# Supplementary material
Source: PubMed Central journal article supplement (PMC5489757)

# Supplementary Figure 1

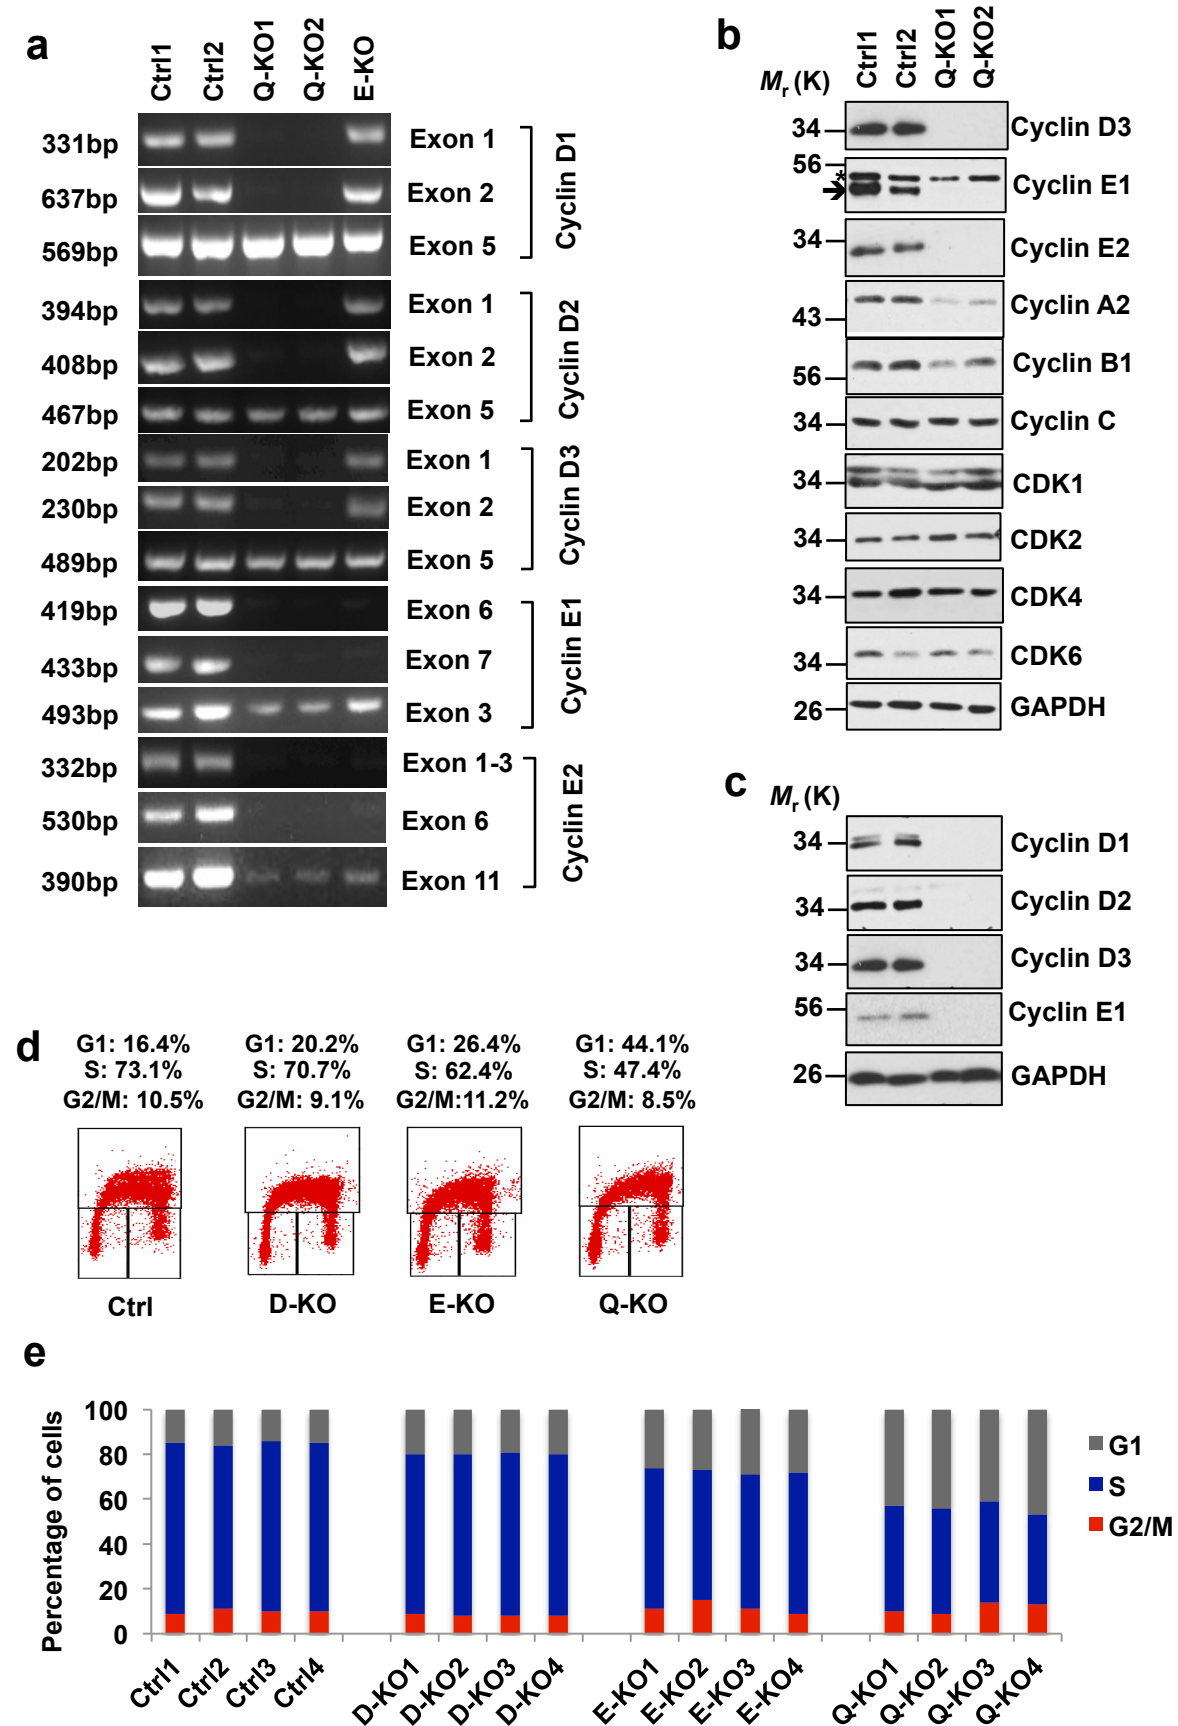

# Supplementary Figure 2

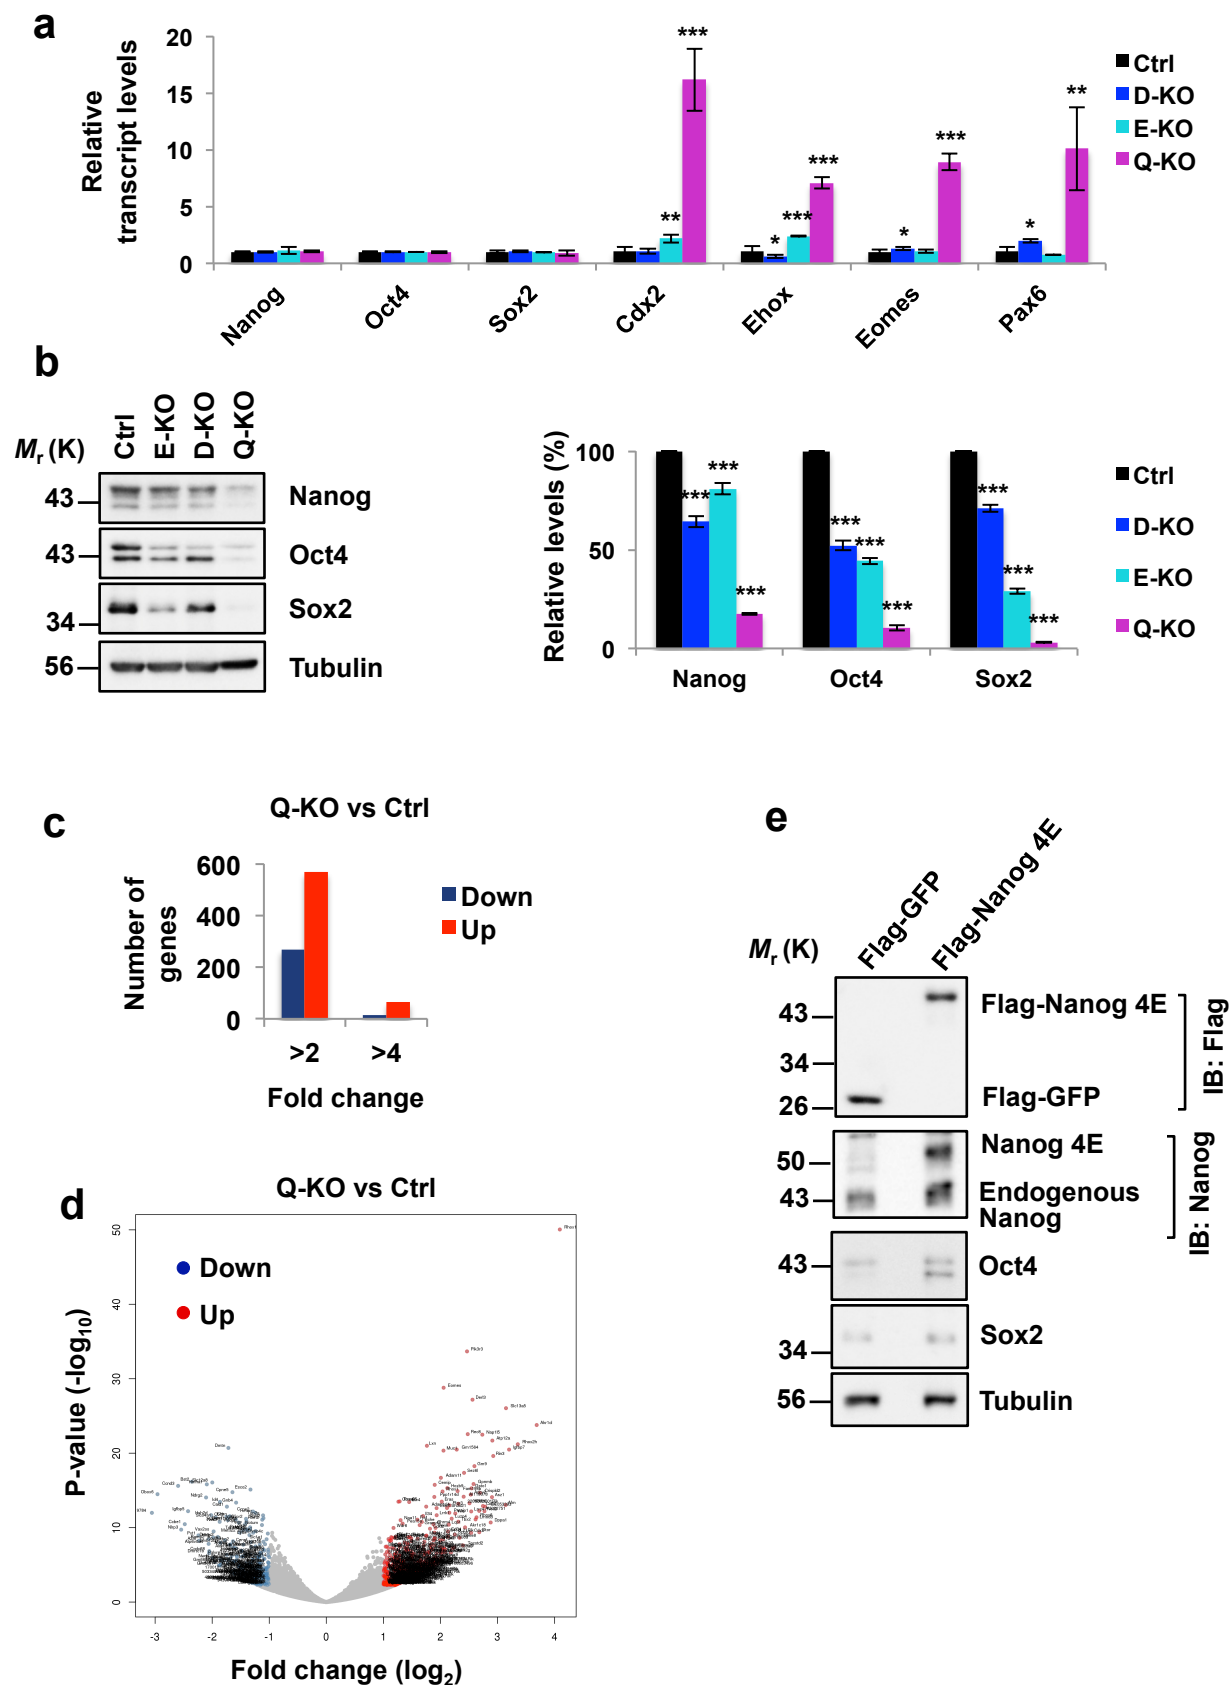

# Supplementary Figure 3

**a**

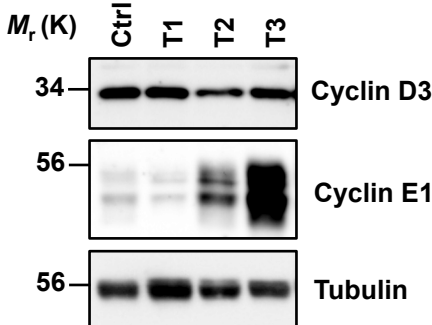

**b**

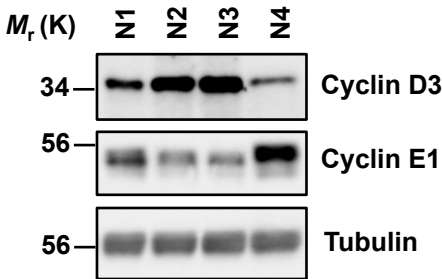

# Supplementary Figure 4

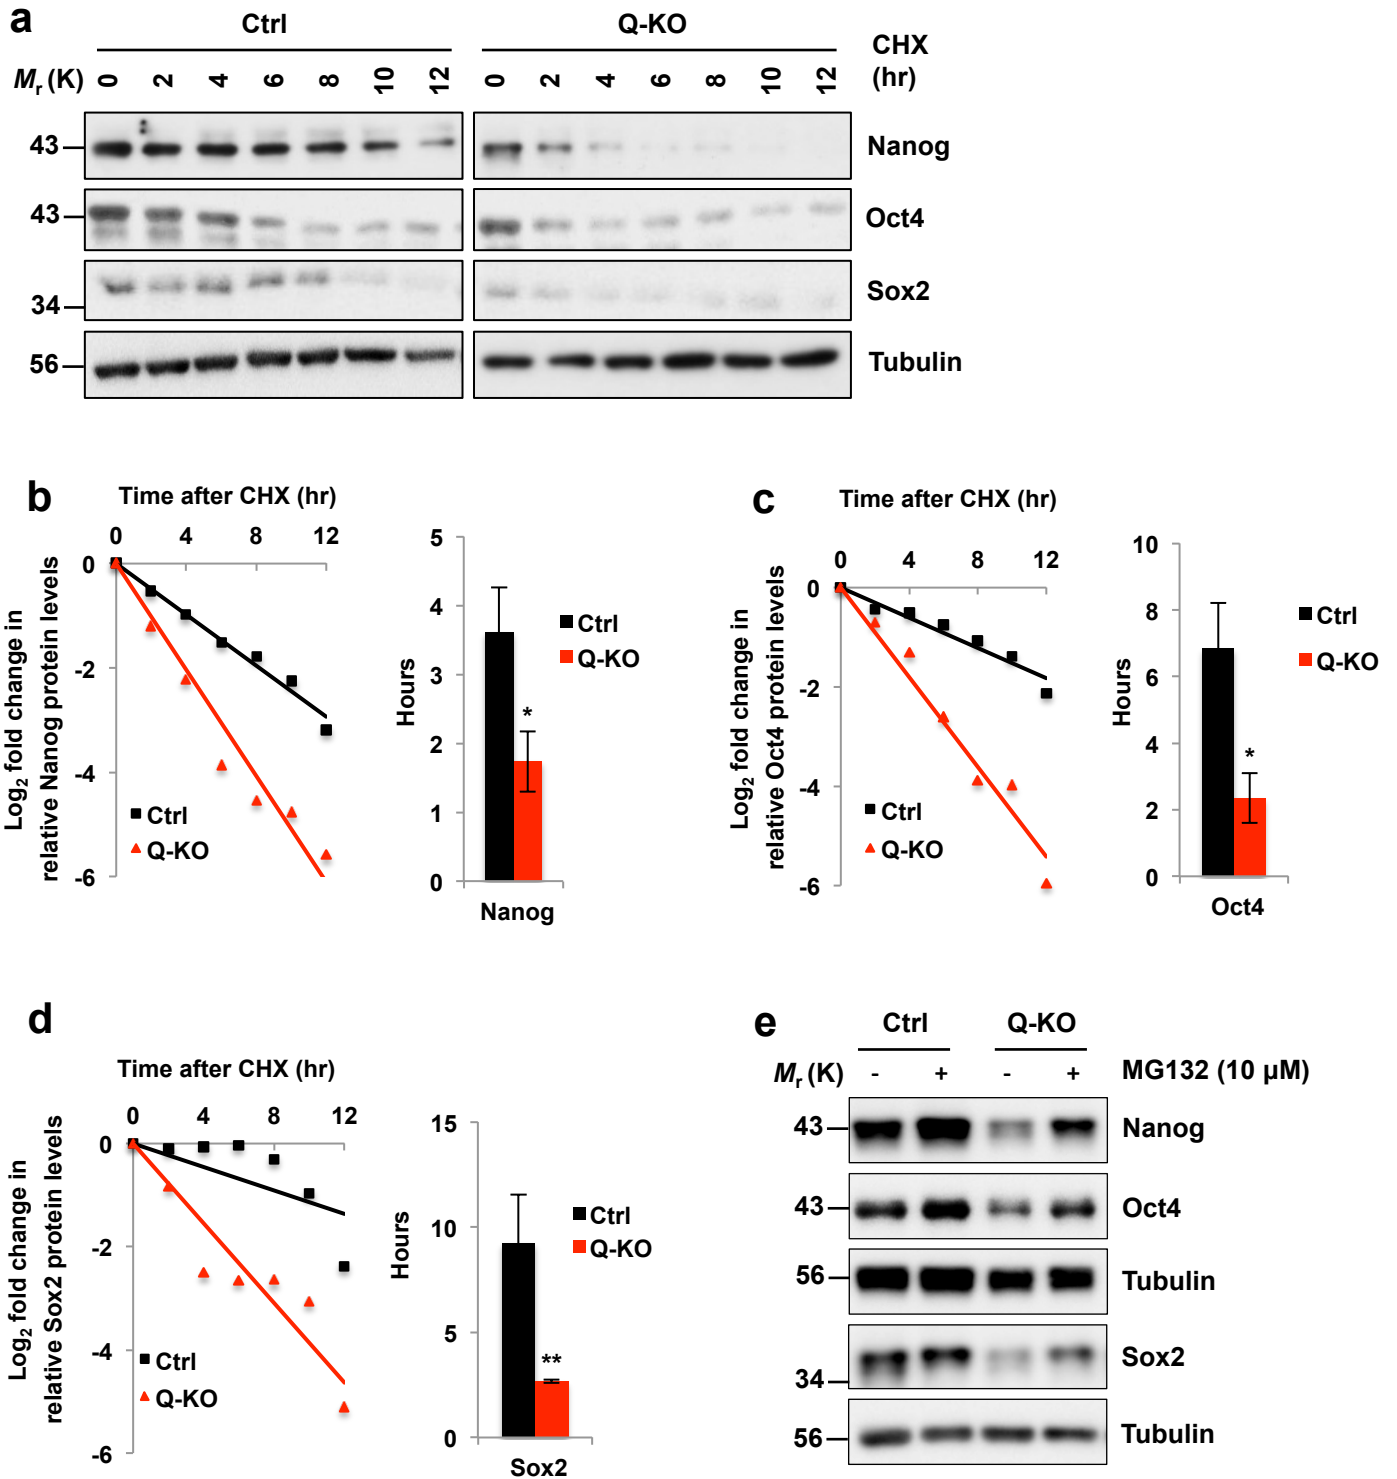

# Supplementary Figure 5

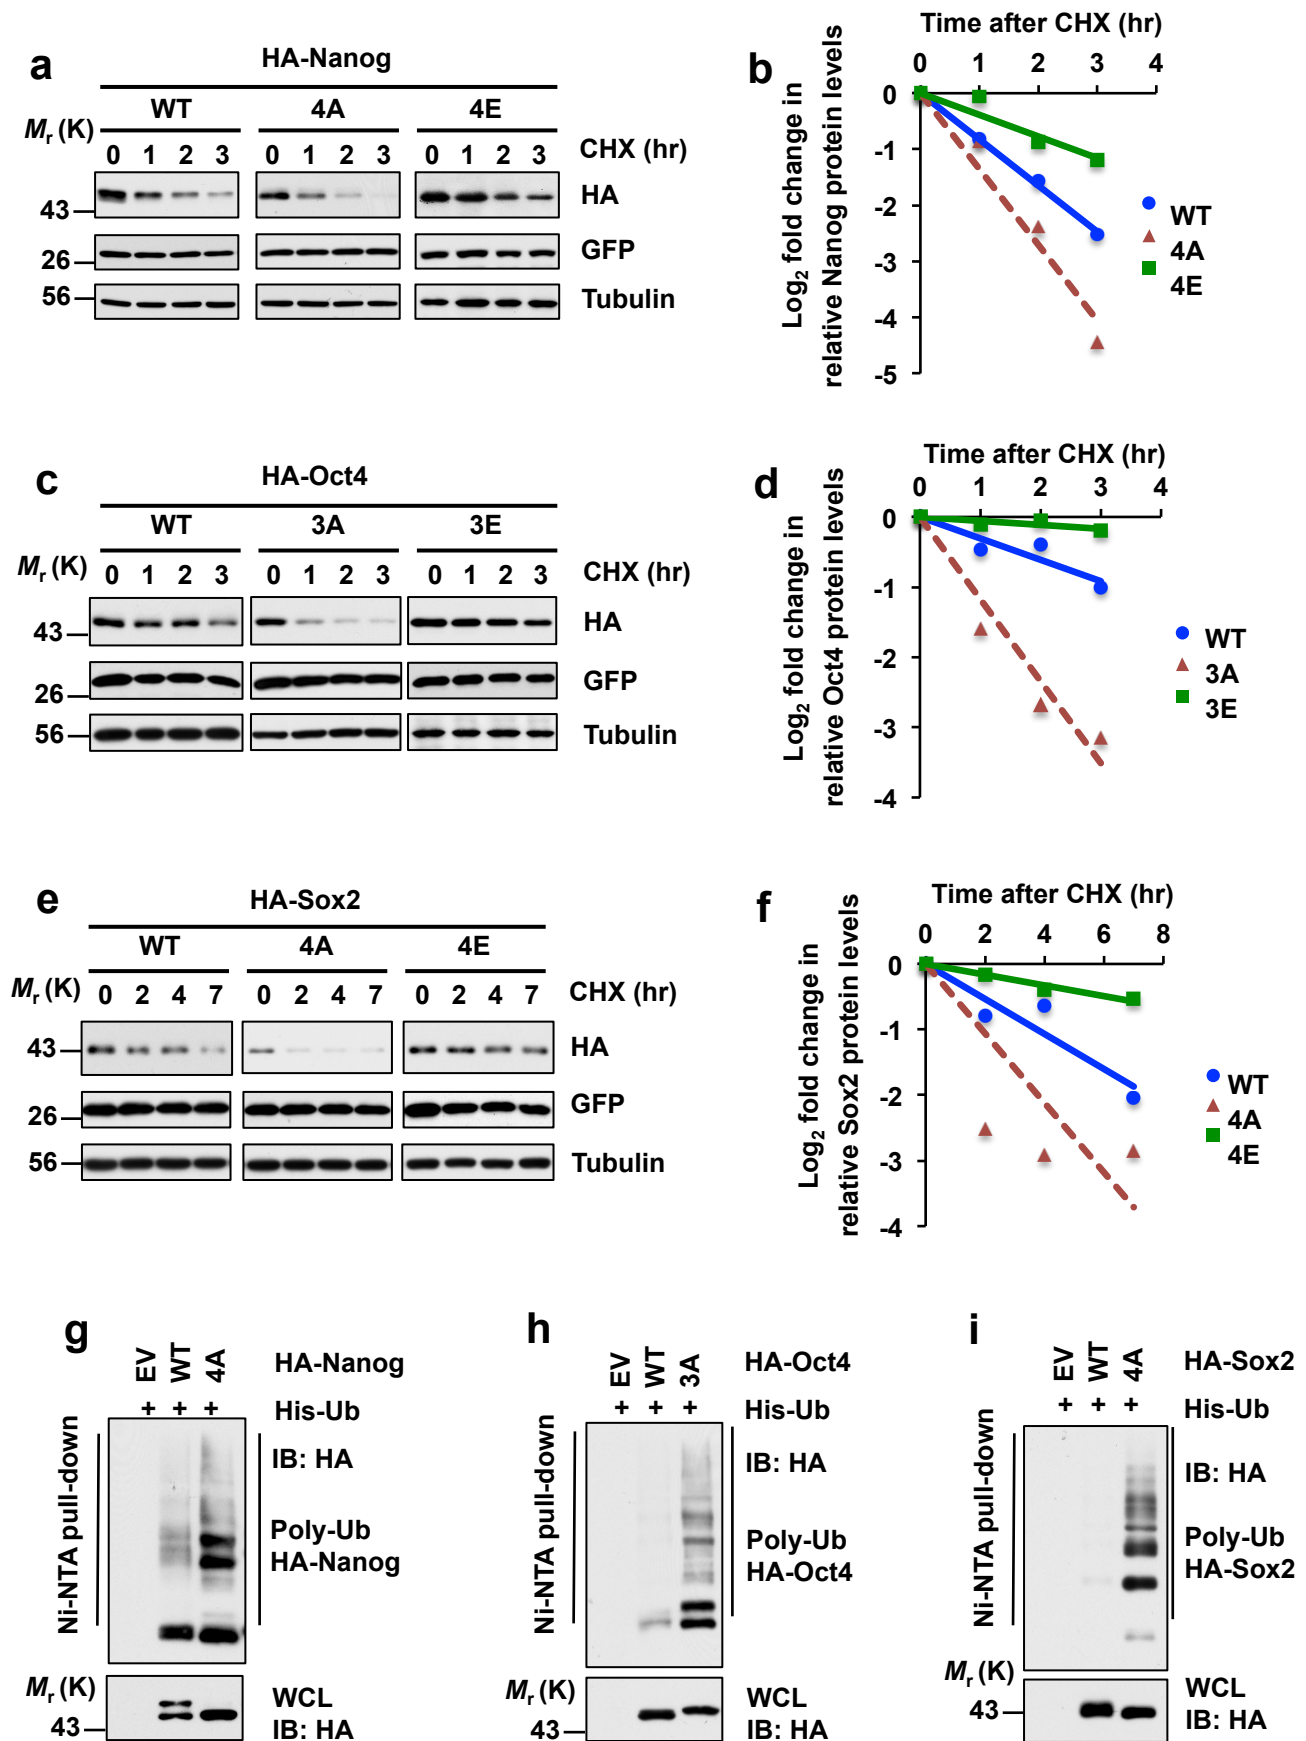

# Supplementary Figure 6

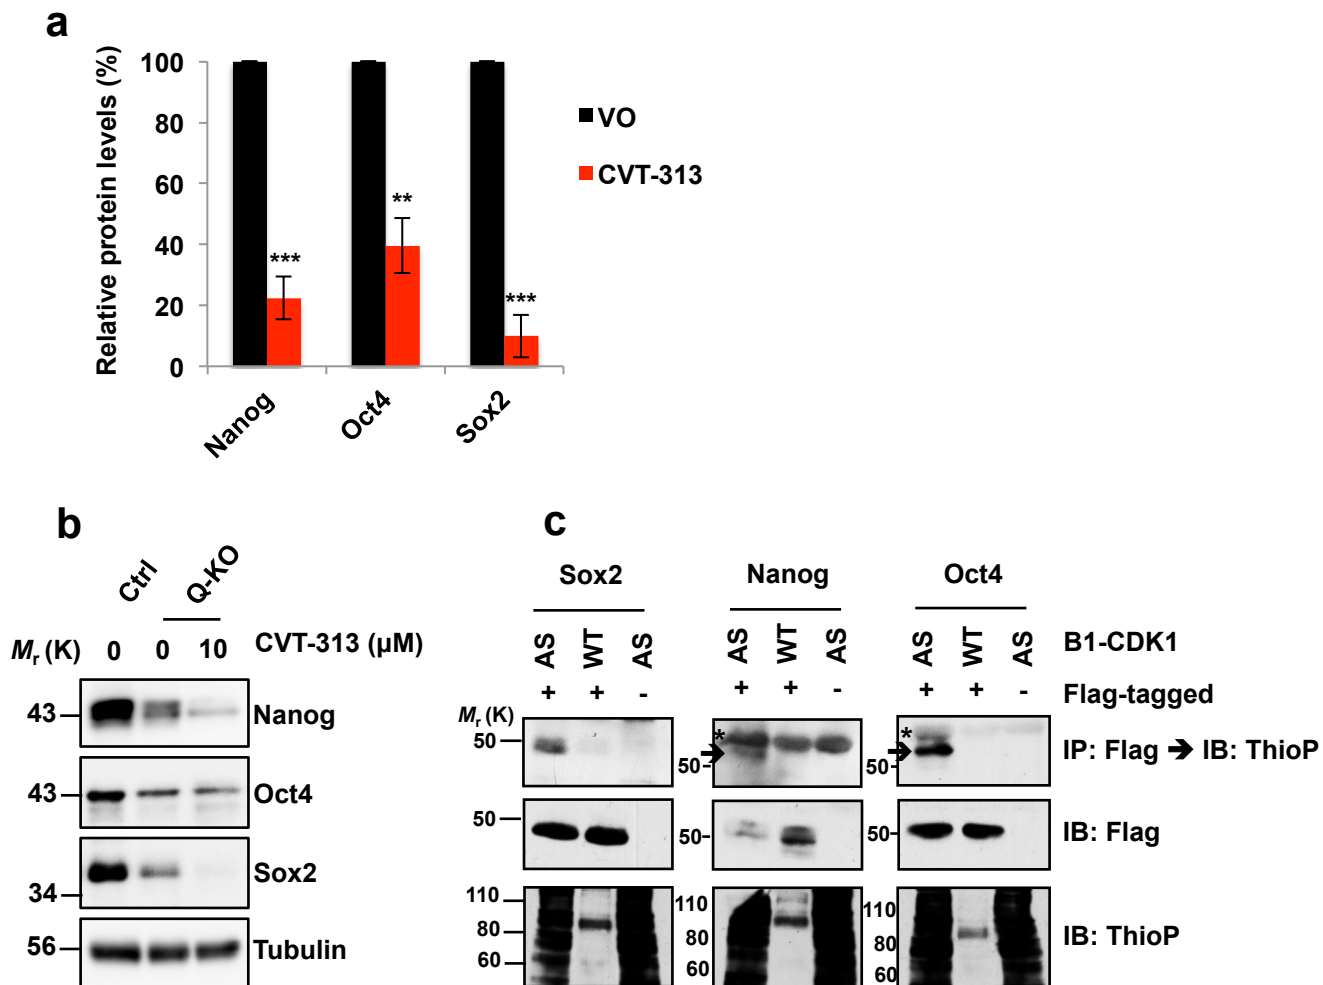

# Supplementary Figure 7

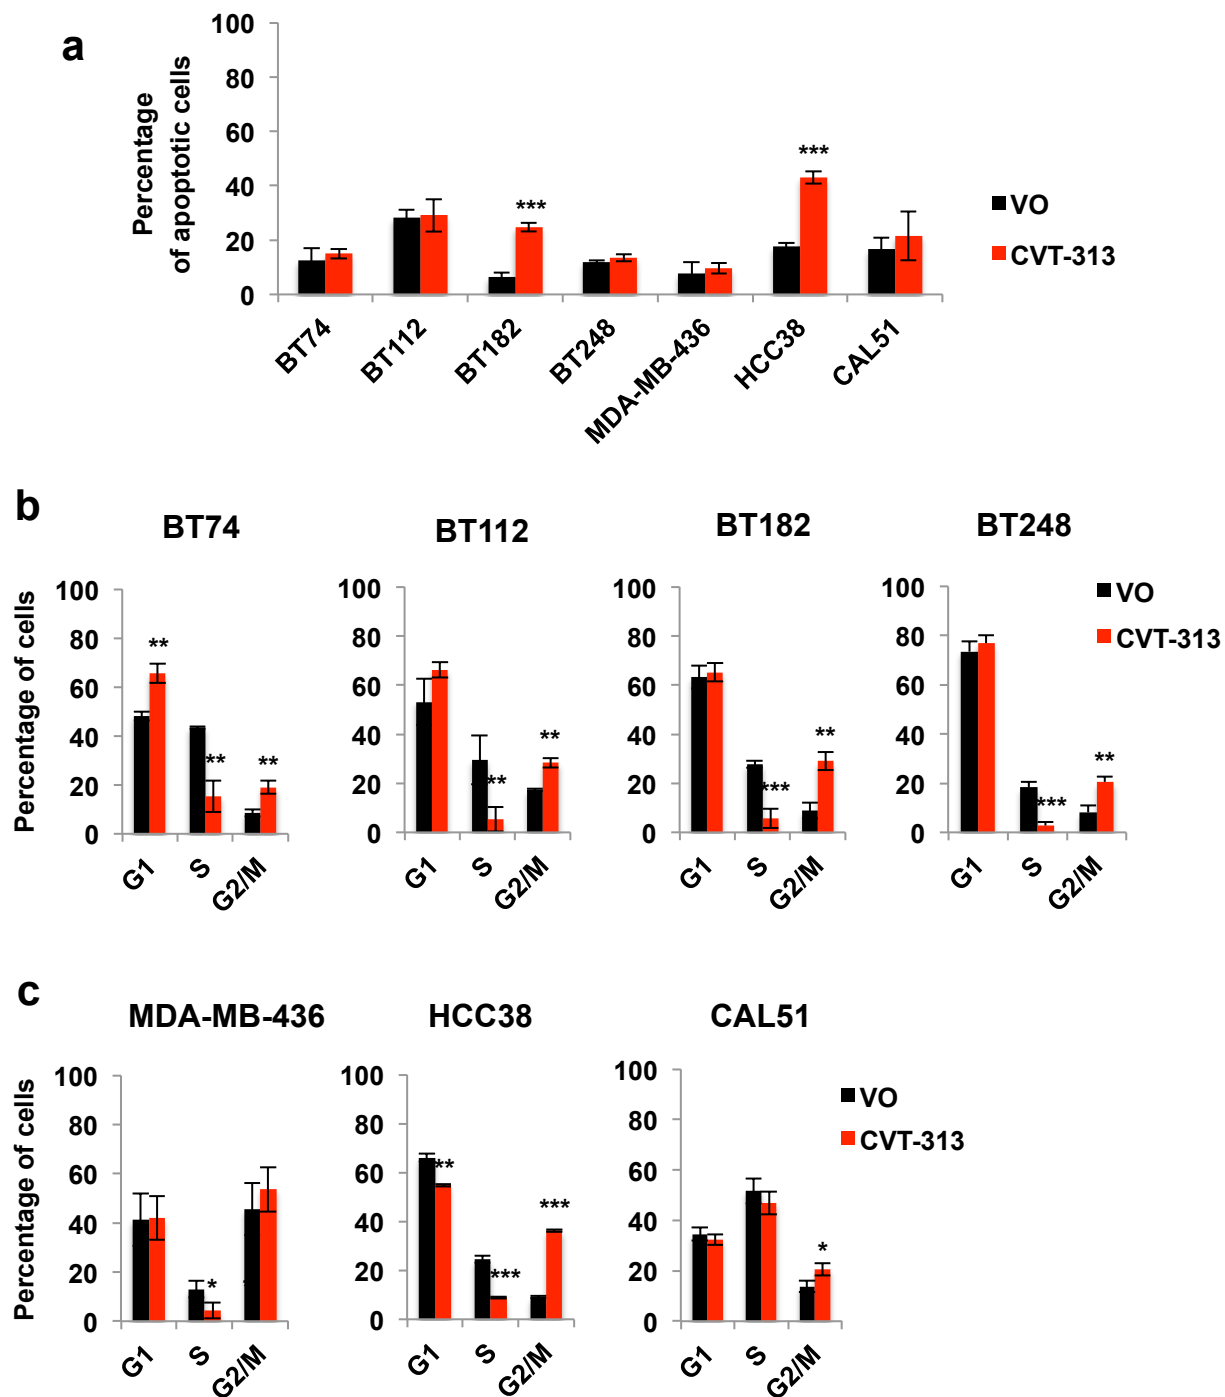

# Supplementary Figure 8

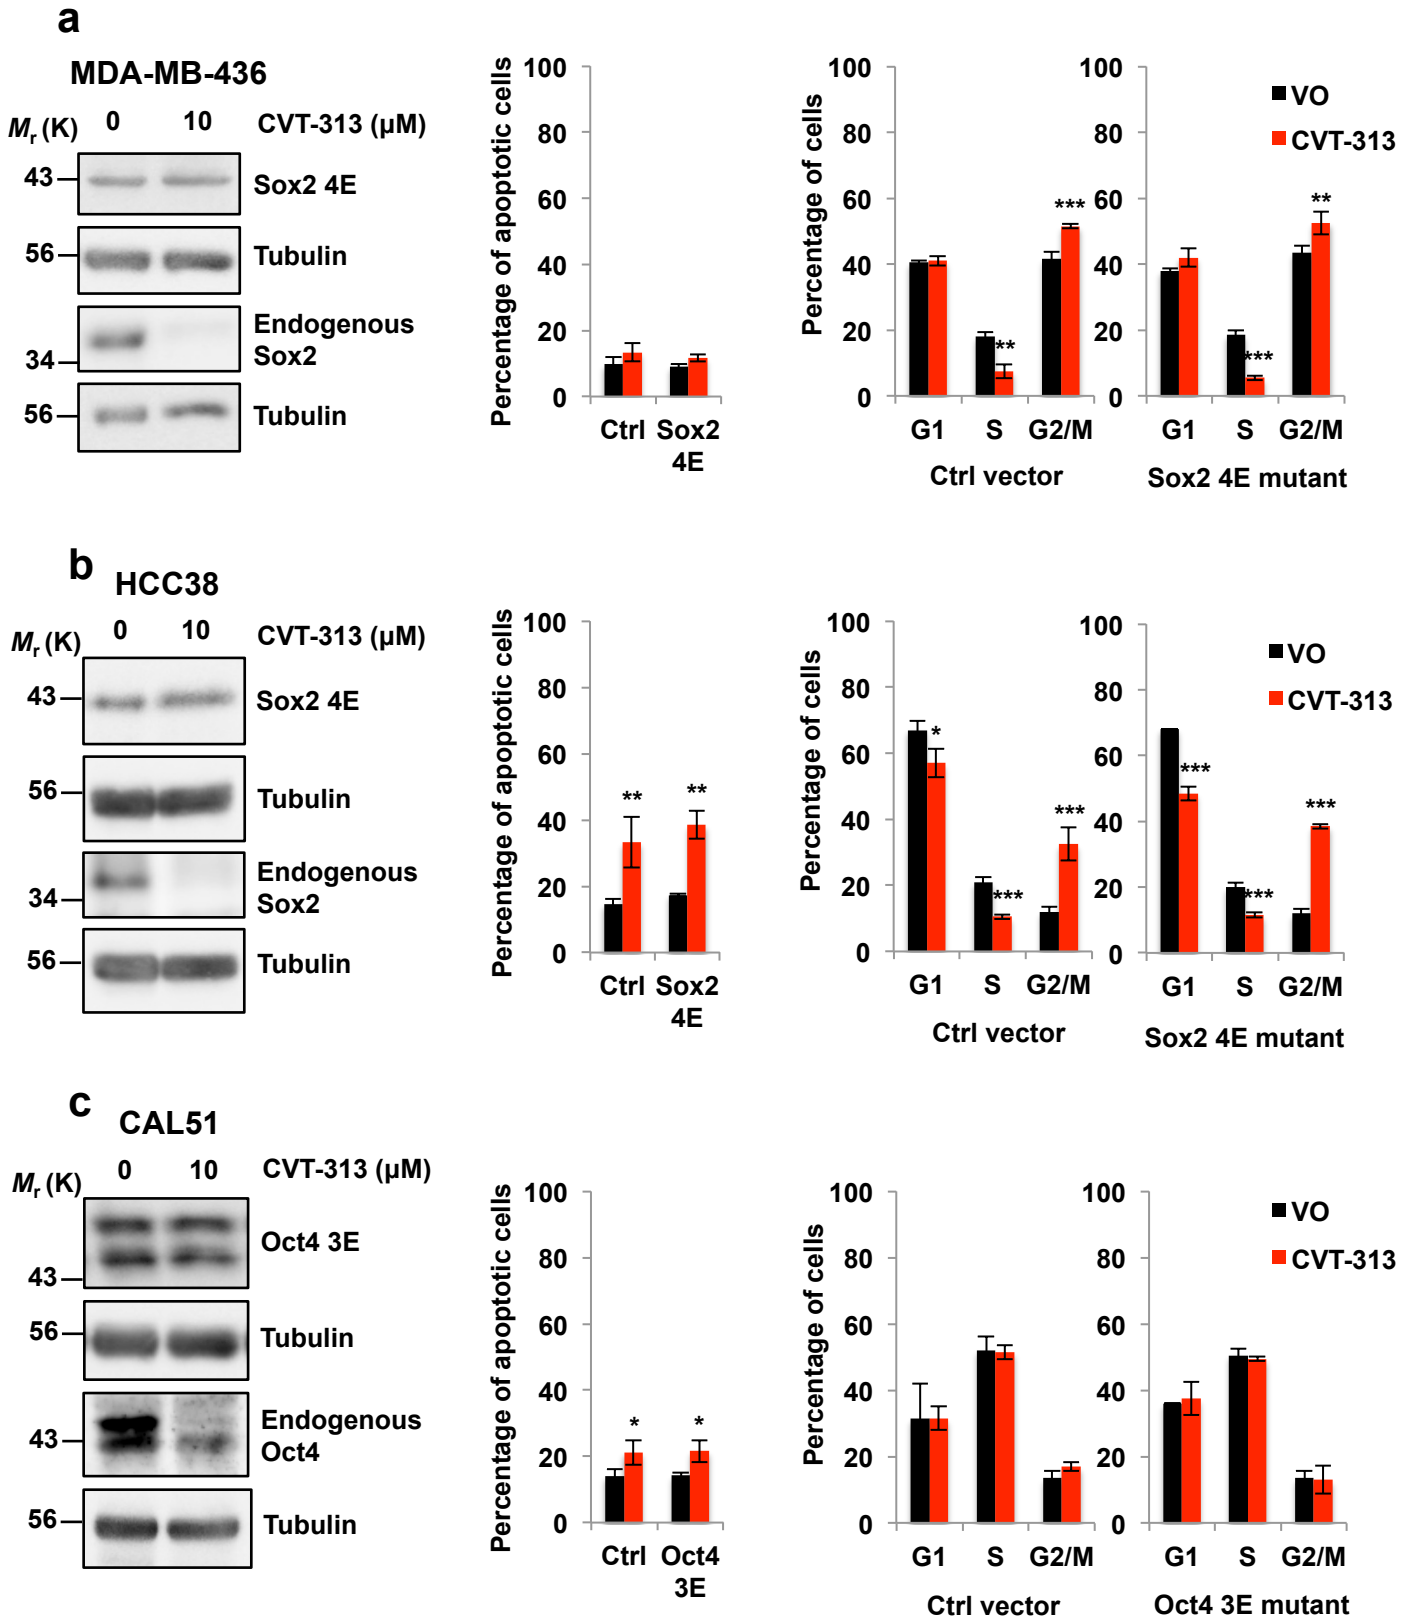

Supplement: NIHMS870431-supplement-Supplemental_Figures.pdf [file NIHMS870431-supplement-Supplemental_Figures.pdf]
