# Supplementary material
Source: PubMed Central journal article supplement (PMC5489757)
Supplement: NIHMS870431-supplement-Supplemental_Tables.pdf [file NIHMS870431-supplement-Supplemental_Tables.pdf]

**Supplementary Table 1: Antibody information.**

|                                                           | Name                                                                             | Catalog/Clone number  | Company name   | Dilution/amount used        |        |
|-----------------------------------------------------------|----------------------------------------------------------------------------------|-----------------------|----------------|-----------------------------|--------|
| <b>For flow cytometry</b>                                 | BrdU                                                                             | 556028                | BD Biosciences | 20 µl/10 <sup>6</sup> cells |        |
|                                                           | SSEA-1                                                                           | 560142                | BD Biosciences | 20 µl/10 <sup>6</sup> cells |        |
|                                                           | Oct4                                                                             | 560794                | BD Biosciences | 20 µl/10 <sup>6</sup> cells |        |
|                                                           | Nanog                                                                            | IC2729G               | R&D            | 5 µl/10 <sup>6</sup> cells  |        |
|                                                           |                                                                                  |                       | LifeSpan       |                             |        |
|                                                           | Hand1                                                                            | LS-C422271            | BioSciences    | 1:50                        |        |
|                                                           | Cdx2                                                                             | MA5-14494             | Thermo Fisher  | 1:10                        |        |
|                                                           | Eomes                                                                            | MAB8889               | R&D            | 1:1000                      |        |
|                                                           | IgG control                                                                      | sc-2027               | Santa Cruz     |                             |        |
|                                                           | Alexa Fluor <sup>®</sup> 488-conjugated goat anti-rabbit IgG polyclonal antibody | A-11034               | Invitrogen     | 1:400                       |        |
| <b>For immunofluorescence staining</b>                    | anti-Cdx2 antibody                                                               | AB4123                | Millipore      | 1:100                       |        |
|                                                           | anti-GFP antibody                                                                | A-1122                | Invitrogen     | 1:1000                      |        |
|                                                           | Alexa Fluor <sup>®</sup> 488-conjugated goat anti-rabbit IgG polyclonal antibody | A-11034               | Invitrogen     | 1:400                       |        |
| <b>For immunohistochemistry and histological staining</b> |                                                                                  |                       | Stemcell       |                             |        |
|                                                           | Primary antibodies                                                               | GFAP                  | 60048          | Technologies                | 1:100  |
|                                                           |                                                                                  | anti-nestin           | MAB353         | Millipore                   | 1:100  |
|                                                           |                                                                                  | anti-beta III tubulin | MMS-435P       | BioLegend                   | 1:2000 |
|                                                           |                                                                                  | anti-NeuN             | MAB377         | Chemicon                    | 1:500  |

|                             |                                  |           |                                                                     |         |
|-----------------------------|----------------------------------|-----------|---------------------------------------------------------------------|---------|
|                             |                                  |           | a gift from Dr. C. Stiles, Dana-Farber Cancer Institute, Boston, MA | 1:10000 |
|                             | anti-Olig2                       |           |                                                                     |         |
|                             | anti-GATA6                       | AF1700    | R&D Systems                                                         | 1:40    |
| Secondary antibodies        |                                  |           |                                                                     |         |
|                             | HRP Envision anti-mouse          | K4001     | Dako                                                                | 1:1     |
|                             | HRP Envision anti-rabbit         | K4003     | Dako                                                                | 1:1     |
|                             | HRP Horse Anti-Goat IgG Antibody | PI-9500   | Vector Labs                                                         | 1:200   |
| <b>For western blotting</b> |                                  |           |                                                                     |         |
|                             | cyclin D1                        | sc-450    | Santa Cruz                                                          | 1:500   |
|                             | cyclin D2                        | MS-213-P0 | Thermo Scientific                                                   | 1:500   |
|                             | cyclin D2                        | K0064-3   | MBL Life Science                                                    | 1:500   |
|                             | cyclin D3                        | C-16      | Santa Cruz                                                          | 1:500   |
|                             | cyclin E1                        | sc-481    | Santa Cruz                                                          | 1:500   |
|                             | cyclin E1                        | BS1085    | Bioworld Technology                                                 | 1:1000  |
|                             | cyclin E2                        | ab32103   | Abcam                                                               | 1:1000  |
|                             | cyclin A2                        | C4710     | Sigma                                                               | 1:1000  |
|                             | cyclin B1                        | C8831     | Sigma                                                               | 1:1000  |
|                             | cyclin C                         | A301-989A | Bethyl Laboratories                                                 | 1:1000  |
|                             | CDK1                             | ab71939   | Abcam                                                               | 1:1000  |
|                             | CDK2                             | sc-6248   | Santa Cruz                                                          | 1:500   |
|                             | CDK4                             | sc-260    | Santa Cruz                                                          | 1:500   |
|                             | CDK6                             | MS-398-P0 | Thermo Scientific                                                   | 1:1000  |

|                     |          |                           |         |
|---------------------|----------|---------------------------|---------|
| GAPDH               | 5174S    | Cell Signaling Technology | 1:5000  |
| Nanog               | AB5731   | Millipore                 | 1:2000  |
| Sox2                | MA1-014  | Invitrogen                | 1:2000  |
| Oct4                | sc-5279  | Santa Cruz                | 1:2000  |
| phospho-S/T-P MPM2  | 05-368MG | Millipore                 | 1:1000  |
| Pin1                | 3722     | Cell Signaling Technology | 1:1000  |
| Flag                | F1804    | Sigma                     | 1:10000 |
| tubulin             | T-5168   | Sigma                     | 1:5000  |
| haemagglutinin      | MMS-101P | Covance                   | 1:4000  |
| GFP                 | 632380   | Invitrogen                | 1:5000  |
| thiophosphate ester | ab92570  | Abcam                     | 1:1000  |
| ubiquitin           | z0458    | Dako                      | 1:2500  |

**For immunoprecipitation**

|       |             |            |                    |
|-------|-------------|------------|--------------------|
| Nanog | sc-30328 AC | Santa Cruz | 30 µl/2 mg protein |
| Sox2  | sc-17320 AC | Santa Cruz | 30 µl/2 mg protein |
| Oct4  | sc-5279 AC  | Santa Cruz | 30 µl/2 mg protein |

**Supplementary Table 2: Sequences of PCR Primers**

| Gene/Primer name   | Primer sequence         |
|--------------------|-------------------------|
| Genotyping primers |                         |
| D1-2-1             | CACGTTGACGGTCAGGGTC     |
| D1-2-2             | CATGGATGGCTGGATCTCCTG   |
| D1-3-1             | GACCTTCTCGAATCAGCCTG    |
| D1-3-2             | GACTGTACTGTATGTAGCTCGTG |
| D1-5-1             | CTAGTCTCTGGCAGCTCTCAC   |
| D1-5-2             | CTCCCTACTCTCAGGGTGATG   |
| D2-1-1             | CTCTCCCAAATCTCCATTGAG   |
| D2-1-2             | GATCTCTGCGTGTTGGAGGTAG  |
| D2-2-1             | GACCCTACCCCACTCTTGATTG  |
| D2-2-2             | CATGAATTTCCATGAGGCACTG  |
| D2-5-1             | CTGAGTGGGCAGGCAAGAAC    |
| D2-5-2             | GCTTACTCAGACTTGCCTAGAC  |
| D3-1-F5            | GATGCTGGCATACTGGATG     |
| D3-1-4             | GAACGCAGGCAGCTGCTTAG    |
| D3-2-1             | CATCCTCCTCGGTTATTGATAC  |
| D3-2-B5            | CAGCCTGGTCCGTATAGATGC   |
| D3-5-1             | CAGACTTCCCAGTGCACAG     |
| D3-5-2             | GAGGAGCTGACTGGCCATG     |
| E1-3-1             | CACCATGTGGACCCATGGTG    |
| E1-3-2             | CTGGGTTTGCAAAGGACTCTG   |
| E1-9-1             | CATGTGGCAGGGACTATGGCTG  |
| E1-9-2             | CACCATGGGTCCACATGGTG    |
| E1-11-1            | GTGGTAGGATTTGCCACCAAG   |
| E1-11-2            | GAGTCCAGTGGGTCAAGTAG    |
| E2-1-F1            | TCAAGACGCAGGTAACAGTG    |
| E2-3-B1            | CATACTGATGCTTCTTGGTGAT  |
| E2-6-F1            | GTATACACTTTCATAGGGAGAC  |
| E2-6-2             | CATTCTTGTGAACTCAGGTGC   |
| E2-6-B2            | CTTGCAATTTGACTGATTAGCAT |
| E2-11-F2           | CTCTGCCTCTCAAGTGCTAAG   |
| E2-11-B2           | GAATGGCAGTGTAACCTTAGA   |
| R26GFP-FF-2        | CTCGGCTAGGTAGGGGATCG    |
| R26GFP/P-B4        | CGTCGCCGTCCAGCTCGACCAG  |
| R26GFP/P-B6        | CACGAACTCCAGCAGGACCATG  |
| R26GFP/P-F2        | CTCCTGGCTTCTGAGGAC      |
| R26GFP-BB-1        | GTGCAGTGTTGAGGGCAATC    |
| R26GFP/P-F7-b      | CTTCTACGAGCGGCTCG       |
| RT-PCR primers     |                         |

|             |                          |
|-------------|--------------------------|
| Nanog_F     | CAGCAGATGCAAGAACTCTCC    |
| Nanog_R     | GGATACTCCACTGGTGCTGAG    |
| Oct4_F      | ATGGCATACTGTGGACCTC      |
| Oct4_R      | AGCAGCTTGGCAAAGTGTTC     |
| Sox2_F      | ATGCACAAGCTCGGAGATCAG    |
| Sox2_R      | TTTATAATCCGGGTGCTCCTTC   |
| Cdx2_F      | AAAAGACAAATACCGGGTGGTG   |
| Cdx2_R      | TGATTTTCCTCTCCTTGGCTCT   |
| Ehox_F      | AACAGCAACCAAGAGGACCAGGAC |
| Ehox_R      | CTCTGGCTTCACTCACACCTATCC |
| Eomes_F     | TGCAAGAGAAAGCGCCTGTCTC   |
| Eomes_R     | CAATCCAGCACCTTGAACGACC   |
| Pax6_F      | TACCAGTGTCTACCAGCCAAT    |
| Pax6_R      | TGCACGAGTATGAGGAGGTCT    |
| Nestin_F    | CCCTGAAGTCGAGGAGCTG      |
| Nestin_R    | CTGCTGCACCTCTAAGCGA      |
| Ngn2_F      | AATGCAAGCGTGGAATTTAGG    |
| Ngn2_R      | ACGTGTGTGGCTGATCCTGG     |
| Fgf5_F      | CTGTATGGACCCACAGGGAGTAAC |
| Fgf5_R      | ATTAAGCTCCTGGGTGCGAAG    |
| Sox1_F      | ATGCACCGCTACGACATGGG     |
| Sox1_R      | GCTCCGACTTGACCAGAGATCC   |
| Brachyury_F | CTCTAATGTCCTCCCTTGTGCC   |
| Brachyury_R | TGCAGATTGTCTTTGGCTACTT   |
| Hand1_F     | GCGTCAGTACCCTGATGCCTTC   |
| Hand1_R     | AAAGAGGAGGTAAGAGGACGGAAG |
| Gooseoid_F  | AAACGCCGAGAAGTGGAACAAG   |
| Gooseoid_R  | AAGGCAGGGTGTGTGCAAGTAG   |
| Runx1_F     | CTCCAATAGCCCTTCTCACTT    |
| Runx1_R     | AGCAAGAGAATGGCTGACTCAC   |
| Sox17_F     | ACAACGCAGAGCTAAGCAAGAT   |
| Sox17_R     | GTACTTGTAGTTGGGGTGGTCCT  |
| Gata4_F     | ATAATCTCCTTCACCCCAGCTC   |
| Gata4_R     | GGGCAGGGCTTCTATGTCTAGT   |
| Gata6_F     | ACAGCCCACTTCTGTGTTCCC    |
| Gata6_R     | GTGGGTTGGTCACGTGGTACAG   |
| Sox9_F      | TCTCCCCCTTTTCTTTGTTGTT   |
| Sox9_R      | ACGCACACATCCACATACAGTC   |

**Supplementary Table 3: Comparisons of transcript abundance between Ctrl and Q-KO ES cells**

| id          | baseMean   | log2 fold cha | lfcSE      | stat       | p-value  | p-adj    |
|-------------|------------|---------------|------------|------------|----------|----------|
| Rhox13      | 1051.60585 | 4.09230298    | 0.27305684 | 14.9870002 | 8.93E-51 | 1.39E-46 |
| Akr1cl      | 1103.11351 | 3.68685325    | 0.36083072 | 10.2176812 | 1.65E-24 | 4.28E-21 |
| Rhox2h      | 103.628217 | 3.35537608    | 0.34866919 | 9.62337982 | 6.37E-22 | 9.91E-19 |
| Igfbp7      | 881.546459 | 3.20320114    | 0.3388073  | 9.45434522 | 3.25E-21 | 3.63E-18 |
| Slc13a5     | 2628.7357  | 3.14898428    | 0.29399032 | 10.7111835 | 9.02E-27 | 2.81E-23 |
| Afm         | 43.6074011 | 3.14303641    | 0.42157241 | 7.45550793 | 8.95E-14 | 2.96E-11 |
| Rin3        | 314.741815 | 2.92585934    | 0.31652124 | 9.24380097 | 2.38E-20 | 2.31E-17 |
| Atp12a      | 562.778586 | 2.90984535    | 0.29872755 | 9.74080017 | 2.02E-22 | 3.49E-19 |
| Asz1        | 712.305439 | 2.90328821    | 0.3737786  | 7.7674009  | 8.01E-15 | 3.37E-12 |
| Dppa1       | 61.4603294 | 2.88065634    | 0.42967763 | 6.70422693 | 2.02E-11 | 3.70E-09 |
| BC053393    | 282.650086 | 2.78470661    | 0.37702789 | 7.3859432  | 1.51E-13 | 4.55E-11 |
| Nell2       | 160.548233 | 2.77174097    | 0.38520434 | 7.19550823 | 6.22E-13 | 1.70E-10 |
| Cd74        | 436.252265 | 2.74526242    | 0.37035132 | 7.41258985 | 1.24E-13 | 3.93E-11 |
| Nap1l5      | 291.609812 | 2.73421477    | 0.27549526 | 9.92472539 | 3.25E-23 | 6.32E-20 |
| Crispld2    | 226.167751 | 2.69342409    | 0.33953671 | 7.93264468 | 2.15E-15 | 1.04E-12 |
| Otor        | 28.2785011 | 2.68141999    | 0.42911292 | 6.2487515  | 4.14E-10 | 6.01E-08 |
| AU022751    | 647.790422 | 2.67967947    | 0.37173328 | 7.20860792 | 5.65E-13 | 1.60E-10 |
| Rhox6       | 447.123946 | 2.63227342    | 0.37965617 | 6.93330859 | 4.11E-12 | 9.13E-10 |
| Lmod3       | 90.3306843 | 2.61638342    | 0.38239611 | 6.84207648 | 7.81E-12 | 1.62E-09 |
| Gm9         | 542.711861 | 2.59571189    | 0.29158509 | 8.90207343 | 5.48E-19 | 5.01E-16 |
| Gpnmb       | 1462.527   | 2.58030471    | 0.31215194 | 8.26618183 | 1.38E-16 | 9.78E-14 |
| Derl3       | 418.925972 | 2.56210295    | 0.23393794 | 10.9520626 | 6.50E-28 | 2.53E-24 |
| Gsto1       | 14423.8207 | 2.54521949    | 0.31395671 | 8.10691231 | 5.19E-16 | 2.99E-13 |
| Lrrc4       | 102.225832 | 2.53948248    | 0.35336528 | 7.18656476 | 6.64E-13 | 1.78E-10 |
| Cdx2        | 47.0771812 | 2.53806029    | 0.40789369 | 6.22235729 | 4.90E-10 | 6.80E-08 |
| Adcy2       | 333.539747 | 2.53098207    | 0.32168886 | 7.8677953  | 3.61E-15 | 1.65E-12 |
| H2bfm       | 121.809433 | 2.51010056    | 0.33364218 | 7.52333106 | 5.34E-14 | 1.85E-11 |
| Rec8        | 8003.94667 | 2.47868208    | 0.24933974 | 9.94098279 | 2.76E-23 | 6.13E-20 |
| Pik3r3      | 6466.42183 | 2.46600561    | 0.2016161  | 12.2311941 | 2.12E-34 | 1.65E-30 |
| Akr1c18     | 51.7511722 | 2.43181775    | 0.37525532 | 6.48043511 | 9.15E-11 | 1.50E-08 |
| Sez6l       | 218.545766 | 2.41413729    | 0.27848038 | 8.6689673  | 4.36E-18 | 3.77E-15 |
| AI118078    | 279.651828 | 2.40715755    | 0.30922827 | 7.7844032  | 7.00E-15 | 3.11E-12 |
| Tacstd2     | 27.1333578 | 2.39778417    | 0.42995583 | 5.57681516 | 2.45E-08 | 2.27E-06 |
| Cpne8       | 172.410098 | 2.33587661    | 0.39103843 | 5.97352181 | 2.32E-09 | 2.82E-07 |
| Tbx2        | 308.383466 | 2.31284206    | 0.3431984  | 6.73908164 | 1.59E-11 | 3.02E-09 |
| 2200002D011 | 297.566729 | 2.3127064     | 0.30814918 | 7.50515195 | 6.14E-14 | 2.07E-11 |
| Fam198b     | 3964.81624 | 2.30067777    | 0.28751677 | 8.00189079 | 1.23E-15 | 6.57E-13 |
| Gm1564      | 5943.91432 | 2.28530579    | 0.24173618 | 9.45371859 | 3.27E-21 | 3.63E-18 |
| Wls         | 1979.18121 | 2.25992156    | 0.31836313 | 7.09856557 | 1.26E-12 | 3.11E-10 |

|         |            |            |            |            |          |            |
|---------|------------|------------|------------|------------|----------|------------|
| Kcnh1   | 118.240821 | 2.25017695 | 0.36644982 | 6.14047762 | 8.23E-10 | 1.12E-07   |
| Rhox2d  | 62.7943794 | 2.24446919 | 0.41007602 | 5.4733003  | 4.42E-08 | 3.84E-06   |
| Slc26a9 | 108.239165 | 2.21408205 | 0.4090818  | 5.41232113 | 6.22E-08 | 5.12E-06   |
| Luzp4   | 119.694545 | 2.19669262 | 0.31955562 | 6.87421054 | 6.23E-12 | 1.33E-09   |
| Rhox2g  | 50.2852088 | 2.18485832 | 0.42128236 | 5.18620893 | 2.15E-07 | 1.48E-05   |
| Ffar3   | 332.218329 | 2.15902602 | 0.29025428 | 7.43839521 | 1.02E-13 | 3.30E-11   |
| Pmaip1  | 3764.28861 | 2.15679488 | 0.30245211 | 7.13102926 | 9.96E-13 | 2.58E-10   |
| Lcp1    | 1525.47099 | 2.14706596 | 0.32499747 | 6.60640827 | 3.94E-11 | 6.73E-09   |
| Prg4    | 52.429348  | 2.1405151  | 0.4321662  | 4.9529902  | NA       | NA         |
| Cyp11a1 | 57.3162529 | 2.13126033 | 0.3533505  | 6.03157574 | 1.62E-09 | 2.10E-07   |
| Cd34    | 154.329039 | 2.1311845  | 0.3394539  | 6.27827367 | 3.42E-10 | 5.02E-08   |
| Hoxb9   | 476.128646 | 2.12078927 | 0.26135616 | 8.11455629 | 4.88E-16 | 2.92E-13   |
| Sh3d21  | 611.433317 | 2.11564699 | 0.28863212 | 7.32990843 | 2.30E-13 | 6.76E-11   |
| C1qtnf9 | 38.6512382 | 2.08494277 | 0.40144231 | 5.19362983 | 2.06E-07 | 1.43E-05   |
| Mrc2    | 216.164522 | 2.08100502 | 0.3868049  | 5.3799862  | 7.45E-08 | 5.94E-06   |
| Mrc1    | 73.9029463 | 2.06140162 | 0.38566186 | 5.34510112 | 9.04E-08 | 7.00E-06   |
| Eomes   | 1009.32322 | 2.05584763 | 0.1822252  | 11.2819064 | 1.61E-29 | 8.36E-26   |
| Muc1    | 331.515239 | 2.05356452 | 0.21799407 | 9.42027691 | 4.50E-21 | 4.66E-18   |
| Gm16063 | 65.0354141 | 2.04916207 | 0.34796067 | 5.88906227 | 3.88E-09 | 4.35E-07   |
| Loxl4   | 208.912258 | 2.04770093 | 0.37584059 | 5.448323   | 5.08E-08 | 4.32E-06   |
| Rhox1   | 803.957581 | 2.03718097 | 0.25509049 | 7.98611102 | 1.39E-15 | 7.22E-13   |
| Rhox2b  | 82.0412765 | 2.02717931 | 0.39443105 | 5.13950242 | 2.75E-07 | 1.83E-05   |
| Rhox9   | 438.190286 | 2.02469142 | 0.41174395 | 4.91735557 | 8.77E-07 | 5.02E-05   |
| Eras    | 426.233089 | 2.02348669 | 0.26659574 | 7.59009381 | 3.20E-14 | 1.24E-11   |
| Parvg   | 122.767446 | 2.02095216 | 0.37655141 | 5.36700194 | 8.01E-08 | 6.32E-06   |
| Adam11  | 1265.73398 | 2.00793539 | 0.23643713 | 8.49247054 | 2.02E-17 | 1.66E-14   |
| Zcchc12 | 53.2861587 | 2.00779308 | 0.38797616 | 5.17504246 | 2.28E-07 | 1.55E-05   |
| Gm12169 | 125.917634 | 2.0032383  | 0.42911118 | 4.66834329 | 3.04E-06 | 0.00014012 |
| Dgkeos  | 52.5626275 | 1.99718491 | 0.36317305 | 5.49926521 | 3.81E-08 | 3.37E-06   |
| Ptgs2   | 79.8559181 | 1.99685055 | 0.34153233 | 5.84673948 | 5.01E-09 | 5.49E-07   |
| Mlkl    | 33.8049148 | 1.99068542 | 0.41569124 | 4.78885588 | 1.68E-06 | 8.61E-05   |
| Cmtm5   | 33.7200242 | 1.96989206 | 0.42191221 | 4.66896191 | 3.03E-06 | 0.00014011 |
| Nxf2    | 87.4908613 | 1.96055695 | 0.42252399 | 4.64010806 | 3.48E-06 | 0.00015742 |
| Tex16   | 19.4149446 | 1.95130927 | 0.43225619 | 4.51424252 | 6.35E-06 | 0.000256   |
| Rhox10  | 40.0885955 | 1.94312085 | 0.40960278 | 4.7439152  | 2.10E-06 | 0.00010284 |
| Espnl   | 25.1049158 | 1.94079993 | 0.42418701 | 4.57534032 | 4.75E-06 | 0.00020146 |
| Lrrk1   | 218.113023 | 1.93408559 | 0.27535307 | 7.02402055 | 2.16E-12 | 5.16E-10   |
| Ecm1    | 241.887122 | 1.93266629 | 0.26382464 | 7.32557157 | 2.38E-13 | 6.85E-11   |
| Fndc1   | 439.263886 | 1.93109762 | 0.37600793 | 5.13578958 | 2.81E-07 | 1.85E-05   |
| Scg3    | 45.9114545 | 1.91771022 | 0.39350951 | 4.87335165 | 1.10E-06 | 6.05E-05   |
| Penk    | 131.379667 | 1.91459568 | 0.2966731  | 6.45355332 | 1.09E-10 | 1.75E-08   |

|             |            |            |            |            |          |            |
|-------------|------------|------------|------------|------------|----------|------------|
| Taf7l       | 268.195792 | 1.90715636 | 0.38818436 | 4.91301696 | 8.97E-07 | 5.11E-05   |
| Smim6       | 26.4797292 | 1.90462427 | 0.42964314 | 4.43303774 | 9.29E-06 | 0.00035589 |
| Gpr85       | 126.092182 | 1.90045629 | 0.31882247 | 5.96086063 | 2.51E-09 | 2.98E-07   |
| Cemip       | 679.95037  | 1.89971563 | 0.23067928 | 8.23531123 | 1.79E-16 | 1.16E-13   |
| 6330410L21F | 585.57738  | 1.89696368 | 0.30447205 | 6.23033777 | 4.65E-10 | 6.64E-08   |
| Ptges       | 3621.28856 | 1.89497939 | 0.31975075 | 5.9264267  | 3.10E-09 | 3.59E-07   |
| Ppp1r14d    | 1553.41033 | 1.8928808  | 0.24344126 | 7.77551351 | 7.51E-15 | 3.25E-12   |
| Mmp23       | 468.725879 | 1.89121635 | 0.33833366 | 5.58979656 | 2.27E-08 | 2.12E-06   |
| Cox6a2      | 49.4046874 | 1.88695177 | 0.40657673 | 4.64107179 | 3.47E-06 | 0.00015715 |
| Aldh1a3     | 568.270127 | 1.87880405 | 0.32146461 | 5.8445128  | 5.08E-09 | 5.52E-07   |
| A730082K24f | 111.378356 | 1.87845627 | 0.40378009 | 4.65217651 | 3.28E-06 | 0.00015023 |
| Chrm4       | 282.527841 | 1.8782498  | 0.28372537 | 6.61995724 | 3.59E-11 | 6.21E-09   |
| LOC10050345 | 19.7818481 | 1.87678141 | 0.42982527 | 4.36638219 | 1.26E-05 | 0.00045684 |
| Gm6406      | 44.3936484 | 1.87614608 | 0.38939974 | 4.81804662 | 1.45E-06 | 7.69E-05   |
| Cr2         | 21.9850567 | 1.87252191 | 0.42197887 | 4.43747791 | 9.10E-06 | 0.00034949 |
| Rhox7       | 39.6115255 | 1.87151587 | 0.4222921  | 4.43180417 | 9.34E-06 | 0.00035705 |
| Mageb4      | 92.4076295 | 1.86782067 | 0.40764218 | 4.58201035 | 4.61E-06 | 0.00019675 |
| Dab2        | 127.852088 | 1.86033438 | 0.40521317 | 4.59100183 | 4.41E-06 | 0.0001895  |
| Avil        | 68.5742396 | 1.85774825 | 0.34788811 | 5.34007406 | 9.29E-08 | 7.15E-06   |
| Rhox2c      | 30.2343693 | 1.84708199 | 0.41523031 | 4.44833129 | 8.65E-06 | 0.00033394 |
| Atxn1       | 652.510529 | 1.84692646 | 0.34136362 | 5.41043723 | 6.29E-08 | 5.12E-06   |
| Alas2       | 18.5896958 | 1.83975611 | 0.43205058 | 4.25819609 | 2.06E-05 | 0.00068333 |
| Cd200       | 233.356346 | 1.83312202 | 0.32547773 | 5.63209654 | 1.78E-08 | 1.72E-06   |
| Nnat        | 240.556139 | 1.8312675  | 0.39347578 | 4.65407936 | 3.25E-06 | 0.00014929 |
| Gm9992      | 33.2082863 | 1.82217466 | 0.41357417 | 4.40591986 | 1.05E-05 | 0.00038939 |
| Psors1c2    | 84.0899139 | 1.82078986 | 0.33103087 | 5.50036274 | 3.79E-08 | 3.37E-06   |
| Cdkl2       | 1119.49676 | 1.81688485 | 0.28318299 | 6.41593932 | 1.40E-10 | 2.22E-08   |
| Sln4        | 182.04793  | 1.80710974 | 0.34666102 | 5.21290139 | 1.86E-07 | 1.30E-05   |
| 1700084C01f | 88.5135535 | 1.80658647 | 0.4023267  | 4.49034694 | 7.11E-06 | 0.00028354 |
| Map3k15     | 871.878727 | 1.79672875 | 0.3490642  | 5.14727297 | 2.64E-07 | 1.76E-05   |
| Lrp2bp      | 19.0219275 | 1.79258019 | 0.42692591 | 4.19880858 | 2.68E-05 | 0.00084639 |
| Brdt        | 289.846449 | 1.78288086 | 0.36465586 | 4.88921489 | 1.01E-06 | 5.67E-05   |
| Trpc6       | 289.8689   | 1.78117258 | 0.34179406 | 5.21124494 | 1.88E-07 | 1.31E-05   |
| 4-Sep       | 312.493927 | 1.77140991 | 0.38537204 | 4.59662279 | 4.29E-06 | 0.00018757 |
| Rbm46       | 41.2321698 | 1.76517428 | 0.39573103 | 4.46054043 | 8.18E-06 | 0.00031784 |
| Lxn         | 1246.52786 | 1.76300257 | 0.1841093  | 9.57584722 | 1.01E-21 | 1.43E-18   |
| Mxd4        | 343.831084 | 1.75424657 | 0.28817386 | 6.08745907 | 1.15E-09 | 1.52E-07   |
| Adamtsl4    | 473.198225 | 1.7507228  | 0.23700191 | 7.38695648 | 1.50E-13 | 4.55E-11   |
| Al661453    | 692.041524 | 1.75037495 | 0.28840509 | 6.06915406 | 1.29E-09 | 1.68E-07   |
| Dbx2        | 61.3921645 | 1.74488526 | 0.38689353 | 4.50998822 | 6.48E-06 | 0.00026051 |
| Sytl4       | 27.5300822 | 1.74190073 | 0.43074401 | 4.0439349  | 5.26E-05 | 0.0014467  |



|             |            |            |            |            |            |            |
|-------------|------------|------------|------------|------------|------------|------------|
| Aqp3        | 19303.572  | 1.73822962 | 0.36905323 | 4.7099699  | 2.48E-06   | 0.00012003 |
| D1Pas1      | 4143.96748 | 1.73052504 | 0.33812106 | 5.11806339 | 3.09E-07   | 2.02E-05   |
| Ddn         | 89.3913294 | 1.72777766 | 0.39893427 | 4.33098325 | 1.48E-05   | 0.00051876 |
| Nnmt        | 865.702966 | 1.7272446  | 0.37415436 | 4.61639571 | 3.90E-06   | 0.00017398 |
| Tspan8      | 35.1136956 | 1.72601911 | 0.40908643 | 4.219204   | 2.45E-05   | 0.00078448 |
| Pianp       | 891.572062 | 1.71971981 | 0.29823762 | 5.76627388 | 8.10E-09   | 8.35E-07   |
| Ccdc169     | 129.926924 | 1.71751859 | 0.34278231 | 5.01052282 | 5.43E-07   | 3.30E-05   |
| Nrcam       | 202.614762 | 1.71687292 | 0.33206807 | 5.17024396 | 2.34E-07   | 1.58E-05   |
| Cyp2r1      | 24.9944592 | 1.71171632 | 0.4183908  | 4.09119014 | 4.29E-05   | 0.00124514 |
| C1ql3       | 66.9873921 | 1.71143305 | 0.38931105 | 4.39605565 | 1.10E-05   | 0.00040431 |
| Cadps2      | 160.663544 | 1.70597256 | 0.30599706 | 5.57512721 | 2.47E-08   | 2.28E-06   |
| Pramel6     | 2734.85579 | 1.70039271 | 0.31728577 | 5.35918367 | 8.36E-08   | 6.55E-06   |
| Il34        | 1182.39129 | 1.69530195 | 0.24250876 | 6.99068331 | 2.74E-12   | 6.35E-10   |
| Slc24a5     | 834.817106 | 1.69270604 | 0.3913385  | 4.32542684 | 1.52E-05   | 0.00052963 |
| H2-T10      | 170.513168 | 1.67959388 | 0.36558369 | 4.59428011 | 4.34E-06   | 0.00018898 |
| Btla        | 103.513748 | 1.67577475 | 0.43034176 | 3.89405564 | 9.86E-05   | 0.0024285  |
| Bche        | 485.67176  | 1.6742957  | 0.24883941 | 6.72841846 | 1.72E-11   | 3.18E-09   |
| Veph1       | 29.9686105 | 1.67389422 | 0.41300133 | 4.05299959 | 5.06E-05   | 0.00140184 |
| BC049715    | 50.1454604 | 1.67264663 | 0.42030971 | 3.97955745 | 6.90E-05   | 0.00182292 |
| Slc25a31    | 231.391635 | 1.66495477 | 0.34820359 | 4.78155544 | 1.74E-06   | 8.84E-05   |
| Rhox2a      | 38.499111  | 1.66329755 | 0.40911644 | 4.06558473 | 4.79E-05   | 0.0013528  |
| Cabs1       | 80.3741971 | 1.66153113 | 0.38001628 | 4.37226305 | 1.23E-05   | 0.00044678 |
| Nefm        | 1134.83115 | 1.65894152 | 0.37213935 | 4.45785036 | 8.28E-06   | 0.00032105 |
| Atp1a4      | 25.1866869 | 1.65122238 | 0.42612447 | 3.8749767  | 0.00010663 | 0.00257098 |
| 1700019A02f | 418.120321 | 1.64953762 | 0.37338348 | 4.41781089 | 9.97E-06   | 0.00037647 |
| Fam124b     | 57.5127985 | 1.64783327 | 0.36224988 | 4.54888565 | 5.39E-06   | 0.00022425 |
| Tlx3        | 84.9675563 | 1.64636165 | 0.31782721 | 5.18005252 | 2.22E-07   | 1.52E-05   |
| Cebpd       | 151.53111  | 1.64418023 | 0.34960701 | 4.70293831 | 2.56E-06   | 0.00012347 |
| Nacad       | 64.064787  | 1.63998027 | 0.40284751 | 4.07097034 | 4.68E-05   | 0.00133802 |
| Gramd2      | 348.266274 | 1.63597283 | 0.24847785 | 6.58397856 | 4.58E-11   | 7.66E-09   |
| Shisa3      | 19.9210017 | 1.63363412 | 0.43202266 | 3.7813621  | 0.00015597 | 0.00348997 |
| 5330417C22f | 28.1320815 | 1.62603609 | 0.41517411 | 3.91651611 | 8.98E-05   | 0.00224248 |
| Rhcg        | 391.366009 | 1.62399748 | 0.41342872 | 3.92811967 | 8.56E-05   | 0.00216482 |
| G630090E17f | 15.612451  | 1.62369853 | 0.43227178 | 3.75619831 | 0.00017251 | 0.00379458 |
| Pcp2        | 57.8144821 | 1.62112281 | 0.41368034 | 3.91878133 | 8.90E-05   | 0.00222867 |
| Cnih2       | 86.2050728 | 1.61585091 | 0.35187844 | 4.59207139 | 4.39E-06   | 0.00018905 |
| Cntn3       | 29.8254858 | 1.61501552 | 0.40610111 | 3.97688032 | 6.98E-05   | 0.00183782 |
| 3830403N18f | 47.4903467 | 1.61435807 | 0.40666263 | 3.96977241 | 7.19E-05   | 0.00188027 |
| Sp9         | 31.0821697 | 1.61165322 | 0.40881234 | 3.94228121 | 8.07E-05   | 0.0020682  |
| Fcer1g      | 43.7512476 | 1.61107838 | 0.38251252 | 4.21183177 | 2.53E-05   | 0.00080352 |
| Slc43a3     | 1770.09968 | 1.61040147 | 0.29209913 | 5.51320176 | 3.52E-08   | 3.17E-06   |

|             |            |            |            |            |            |            |
|-------------|------------|------------|------------|------------|------------|------------|
| Nav3        | 15.7686902 | 1.61036011 | 0.42188137 | 3.81709228 | NA         | NA         |
| Fbxo39      | 85.9995712 | 1.60471114 | 0.35046694 | 4.57878038 | 4.68E-06   | 0.00019872 |
| Tmem82      | 800.847118 | 1.60117773 | 0.2702506  | 5.92478882 | 3.13E-09   | 3.60E-07   |
| Slc4a9      | 141.231995 | 1.59737383 | 0.37805873 | 4.22520025 | 2.39E-05   | 0.00076863 |
| Wnt2b       | 20.111916  | 1.59694512 | 0.4315238  | 3.70071153 | 0.000215   | 0.00451201 |
| Fjx1        | 287.309078 | 1.59678396 | 0.23381786 | 6.82917883 | 8.54E-12   | 1.71E-09   |
| Omp         | 153.601893 | 1.59179219 | 0.32190314 | 4.94494155 | 7.62E-07   | 4.42E-05   |
| F2rl2       | 16.0582649 | 1.57596708 | 0.43038153 | 3.66179072 | 0.00025046 | 0.00507146 |
| Rasl10b     | 302.827056 | 1.56824074 | 0.3971893  | 3.94834586 | 7.87E-05   | 0.00202945 |
| Tspan12     | 74.6857467 | 1.56377721 | 0.40724593 | 3.83988422 | 0.00012309 | 0.00289228 |
| Dyrk4       | 59.9515787 | 1.56257932 | 0.36001128 | 4.34036205 | 1.42E-05   | 0.0005039  |
| Tmem132d    | 64.6831669 | 1.56225016 | 0.39784556 | 3.9267754  | 8.61E-05   | 0.00217341 |
| Synpo2l     | 39.784012  | 1.55784328 | 0.42221836 | 3.68966255 | 0.00022455 | 0.004656   |
| Rhox4a      | 91.5129119 | 1.55157625 | 0.37632442 | 4.12297515 | 3.74E-05   | 0.00110785 |
| Cd180       | 164.46204  | 1.54895823 | 0.39291432 | 3.94222902 | 8.07E-05   | 0.0020682  |
| Zfp521      | 134.824187 | 1.54679872 | 0.34832291 | 4.44070339 | 8.97E-06   | 0.00034514 |
| Klb         | 721.302099 | 1.5449334  | 0.35069699 | 4.40532273 | 1.06E-05   | 0.00038939 |
| Tecrl       | 23.6961243 | 1.54429005 | 0.43223898 | 3.57276903 | 0.00035323 | 0.00662114 |
| Tmem181b-p  | 1243.5575  | 1.54413783 | 0.3606662  | 4.28134884 | 1.86E-05   | 0.00062259 |
| Sp100       | 358.139664 | 1.54336069 | 0.33004675 | 4.67618818 | 2.92E-06   | 0.00013585 |
| BC049762    | 179.18097  | 1.53757166 | 0.38390861 | 4.00504607 | 6.20E-05   | 0.00165111 |
| Junb        | 1009.57354 | 1.5361468  | 0.3004133  | 5.11344465 | 3.16E-07   | 2.06E-05   |
| 1700011H14l | 15.6195331 | 1.53382961 | 0.43054479 | 3.56253201 | 0.0003673  | 0.00685534 |
| Lpo         | 26.7588062 | 1.52794967 | 0.41281345 | 3.70130785 | 0.00021449 | 0.0045075  |
| Adcyap1     | 40.7222489 | 1.52745176 | 0.37687202 | 4.052972   | 5.06E-05   | 0.00140184 |
| Klrg2       | 243.66258  | 1.52510483 | 0.38403222 | 3.97129393 | 7.15E-05   | 0.00187144 |
| Fam186b     | 30.1377974 | 1.52226955 | 0.43123671 | 3.53000915 | 0.00041555 | 0.00754043 |
| Pinlyp      | 91.1422903 | 1.51995937 | 0.3574606  | 4.25210319 | 2.12E-05   | 0.00069625 |
| Klhl32      | 83.6155776 | 1.51590304 | 0.30442133 | 4.9796217  | 6.37E-07   | 3.77E-05   |
| Cidea       | 314.846194 | 1.51113851 | 0.36249596 | 4.16870445 | 3.06E-05   | 0.0009452  |
| Kcnk2       | 41.2920512 | 1.50876558 | 0.39060731 | 3.86261479 | 0.00011218 | 0.00268386 |
| Serp2       | 284.436445 | 1.50780106 | 0.31597289 | 4.77193166 | 1.82E-06   | 9.15E-05   |
| Tbx20       | 98.3262502 | 1.50754452 | 0.42372296 | 3.55785423 | 0.0003739  | 0.0069551  |
| Yipf7       | 29.3614145 | 1.50684858 | 0.42869544 | 3.51496289 | 0.00043982 | 0.00786255 |
| Fosl2       | 134.311094 | 1.50616152 | 0.29530749 | 5.10031604 | 3.39E-07   | 2.19E-05   |
| Hecw2       | 277.406875 | 1.50218632 | 0.31645351 | 4.74694164 | 2.07E-06   | 0.00010163 |
| Tmem59l     | 28.1647665 | 1.50183468 | 0.42640212 | 3.52210886 | 0.00042813 | 0.00772113 |
| Gm773       | 51.5313354 | 1.49802252 | 0.36906723 | 4.05894205 | 4.93E-05   | 0.00138172 |
| Spred3      | 349.306133 | 1.49419293 | 0.25737046 | 5.80561163 | 6.41E-09   | 6.74E-07   |
| Hpca        | 148.083836 | 1.49396945 | 0.37531782 | 3.98054489 | 6.88E-05   | 0.00181845 |
| Cd3e        | 1420.9424  | 1.49274774 | 0.36404799 | 4.10041472 | 4.12E-05   | 0.00120326 |

|            |            |            |            |            |            |            |
|------------|------------|------------|------------|------------|------------|------------|
| Rhox4d     | 16.9448383 | 1.49246745 | 0.43157405 | 3.45819549 | 0.00054381 | 0.00924426 |
| Chrna4     | 650.860108 | 1.4900931  | 0.43210657 | 3.4484389  | 0.00056384 | 0.00951001 |
| Nfe2       | 575.993444 | 1.4892089  | 0.25021441 | 5.95173115 | 2.65E-09   | 3.10E-07   |
| Tspan32    | 450.857122 | 1.48912146 | 0.29900785 | 4.98020853 | 6.35E-07   | 3.77E-05   |
| Ccdc116    | 132.83272  | 1.48903428 | 0.28266183 | 5.26790007 | 1.38E-07   | 1.01E-05   |
| D330045A20 | 30.4057481 | 1.48886594 | 0.40013432 | 3.72091538 | 0.0001985  | 0.00425193 |
| Angptl3    | 13.4931419 | 1.48636317 | 0.42818249 | 3.47133107 | 0.00051789 | 0.00888922 |
| Otx1       | 142.807425 | 1.48599861 | 0.30642366 | 4.84949048 | 1.24E-06   | 6.66E-05   |
| Tktl2      | 247.545983 | 1.48433703 | 0.3971645  | 3.73733564 | 0.00018598 | 0.00405636 |
| Anxa3      | 94.308737  | 1.48215875 | 0.42312329 | 3.5029004  | 0.00046022 | 0.0081421  |
| Ctgf       | 2423.57169 | 1.48179709 | 0.35557264 | 4.16735403 | 3.08E-05   | 0.00094894 |
| Fbln5      | 364.692107 | 1.48037932 | 0.29017609 | 5.10165842 | 3.37E-07   | 2.18E-05   |
| Themis3    | 25.598282  | 1.47240045 | 0.42012491 | 3.50467308 | 0.00045717 | 0.00809729 |
| Gm20756    | 18.6034225 | 1.47214099 | 0.43219681 | 3.40618195 | 0.00065878 | 0.01077258 |
| Lman1l     | 9.46318021 | 1.47174009 | 0.4148068  | 3.54801346 | 0.00038815 | 0.00710965 |
| 1600010M07 | 11.7780266 | 1.46826249 | 0.4308437  | 3.40787737 | 0.0006547  | 0.01074063 |
| Zfp783     | 119.187355 | 1.46531533 | 0.33168929 | 4.41773484 | 9.97E-06   | 0.00037647 |
| Dclk3      | 834.086658 | 1.46314324 | 0.24394278 | 5.99789521 | 2.00E-09   | 2.49E-07   |
| Spint5     | 115.630527 | 1.46045126 | 0.358249   | 4.07663733 | 4.57E-05   | 0.00131098 |
| Prr23a     | 120.135128 | 1.45749742 | 0.36606957 | 3.98147661 | 6.85E-05   | 0.00181442 |
| Bmp1       | 136.849871 | 1.45552924 | 0.33550247 | 4.33835626 | 1.44E-05   | 0.00050644 |
| Dgkk       | 18.8752213 | 1.45456467 | 0.43135529 | 3.37208026 | 0.00074603 | 0.01184554 |
| Wnt6       | 98.0853483 | 1.45410128 | 0.30407305 | 4.78207875 | 1.73E-06   | 8.84E-05   |
| Etv4       | 1864.60281 | 1.45228468 | 0.1917617  | 7.57338248 | 3.64E-14   | 1.32E-11   |
| Ecel1      | 200.422441 | 1.44593377 | 0.39115903 | 3.69653686 | 0.00021856 | 0.00457447 |
| Chrna1     | 19.3482683 | 1.44447621 | 0.42413391 | 3.40570792 | 0.00065993 | 0.01077997 |
| Fgf18      | 29.7827555 | 1.44337657 | 0.40269091 | 3.58432864 | 0.00033795 | 0.00645627 |
| Fkbp6      | 3937.84775 | 1.44133682 | 0.23971649 | 6.01267279 | 1.82E-09   | 2.31E-07   |
| Rnf150     | 21.5430066 | 1.43991448 | 0.43227189 | 3.3310389  | 0.00086523 | 0.01320423 |
| Fam196a    | 44.7344987 | 1.43348566 | 0.40676246 | 3.52413457 | 0.00042487 | 0.00769165 |
| Reep2      | 260.099827 | 1.43283389 | 0.25578292 | 5.60175759 | 2.12E-08   | 2.00E-06   |
| Zbtbd6     | 198.226131 | 1.42864403 | 0.26549555 | 5.38104699 | 7.41E-08   | 5.94E-06   |
| Plat       | 125.141819 | 1.42291713 | 0.34434567 | 4.13223466 | 3.59E-05   | 0.00107437 |
| Scarf2     | 156.841542 | 1.4225441  | 0.34270474 | 4.15093207 | 3.31E-05   | 0.00101364 |
| Calml4     | 169.642582 | 1.42230353 | 0.38618609 | 3.68294858 | 0.00023055 | 0.00474875 |
| S100a13    | 5493.70572 | 1.421287   | 0.33267069 | 4.27235412 | 1.93E-05   | 0.00064547 |
| Stard6     | 46.7932265 | 1.4212792  | 0.38851585 | 3.65822706 | 0.00025397 | 0.00513579 |
| Grk5       | 549.829627 | 1.4197906  | 0.24889348 | 5.70441056 | 1.17E-08   | 1.16E-06   |
| Cnga4      | 571.771483 | 1.41774112 | 0.2684752  | 5.28071543 | 1.29E-07   | 9.62E-06   |
| Snx33      | 148.096517 | 1.41688848 | 0.29555926 | 4.79392346 | 1.64E-06   | 8.42E-05   |
| Nlrp5-ps   | 107.230092 | 1.41641598 | 0.36016641 | 3.93267091 | 8.40E-05   | 0.00213813 |

|             |            |            |            |            |            |            |
|-------------|------------|------------|------------|------------|------------|------------|
| B830017H08I | 81.2324853 | 1.41638647 | 0.39189795 | 3.6141717  | 0.00030131 | 0.00585784 |
| Fbn1        | 342.337664 | 1.41256921 | 0.359143   | 3.93316653 | 8.38E-05   | 0.00213722 |
| Igsf5       | 87.3599053 | 1.41196534 | 0.4123194  | 3.42444554 | 0.00061606 | 0.01024628 |
| Fam115a     | 414.847853 | 1.40822759 | 0.34813451 | 4.04506752 | 5.23E-05   | 0.00144484 |
| Fam154a     | 119.055274 | 1.40760796 | 0.33095109 | 4.25322053 | 2.11E-05   | 0.00069425 |
| Iqcf4       | 10.6922714 | 1.40642744 | 0.4208339  | 3.34200132 | 0.00083177 | 0.01283215 |
| Frrs1l      | 189.284584 | 1.40383712 | 0.31726672 | 4.42478533 | 9.65E-06   | 0.00036796 |
| Arntl2      | 549.550226 | 1.40253199 | 0.25963909 | 5.40185226 | 6.60E-08   | 5.34E-06   |
| Prdm6       | 31.796008  | 1.40152182 | 0.41634831 | 3.36622434 | 0.00076205 | 0.01201886 |
| Stard10     | 815.817682 | 1.39724853 | 0.32215003 | 4.33726023 | 1.44E-05   | 0.00050644 |
| 2900005J15R | 62.0399927 | 1.39616077 | 0.4167222  | 3.35033932 | 0.00080713 | 0.01257677 |
| Hmcn1       | 45.4464457 | 1.395786   | 0.40304577 | 3.46309548 | 0.000534   | 0.00913234 |
| Prkcq       | 24.7863152 | 1.39348329 | 0.42608044 | 3.27047    | 0.00107369 | 0.01540308 |
| Pigz        | 15.8882692 | 1.39277493 | 0.4321487  | 3.22290663 | 0.00126897 | 0.01738655 |
| Lrrc73      | 47.4785467 | 1.38952819 | 0.39138281 | 3.55030455 | 0.00038479 | 0.00707305 |
| Sycp2       | 56.3852584 | 1.38559064 | 0.38500081 | 3.59892918 | 0.00031953 | 0.00616503 |
| BC051019    | 123.707778 | 1.38552835 | 0.37095394 | 3.73504147 | 0.00018768 | 0.00408778 |
| Gp5         | 27.6644132 | 1.3855014  | 0.40069593 | 3.45773761 | 0.00054473 | 0.00924426 |
| Ceacam20    | 243.845349 | 1.38453719 | 0.25416282 | 5.44744195 | 5.11E-08   | 4.32E-06   |
| Prr5l       | 551.056643 | 1.38342484 | 0.37479232 | 3.6911771  | 0.00022322 | 0.00464074 |
| Slc22a14    | 26.8968511 | 1.38227957 | 0.40566079 | 3.40747644 | 0.00065567 | 0.01074063 |
| Dock10      | 69.8567972 | 1.3767269  | 0.40885568 | 3.36726861 | 0.00075917 | 0.01198559 |
| Atg16l2     | 825.128823 | 1.37585335 | 0.26288568 | 5.23365656 | 1.66E-07   | 1.20E-05   |
| Col14a1     | 19.8699882 | 1.37438806 | 0.42229768 | 3.25454801 | 0.00113573 | 0.01605493 |
| Lyn         | 1092.31505 | 1.37135358 | 0.23979246 | 5.71891875 | 1.07E-08   | 1.08E-06   |
| Trpv4       | 290.514149 | 1.36939497 | 0.31422828 | 4.35796223 | 1.31E-05   | 0.00047257 |
| 9630028B13F | 11.3520651 | 1.36376608 | 0.43118231 | 3.16285259 | 0.00156231 | 0.02016379 |
| Rgs9        | 1371.04188 | 1.36320289 | 0.29511866 | 4.61916874 | 3.85E-06   | 0.00017217 |
| Spns3       | 183.349882 | 1.36034819 | 0.33845667 | 4.01926841 | 5.84E-05   | 0.00156678 |
| Sox2ot      | 74.5890144 | 1.35902218 | 0.34943287 | 3.88922248 | 0.00010057 | 0.00244799 |
| Slc7a8      | 2901.43626 | 1.35804693 | 0.42764346 | 3.1756523  | 0.001495   | 0.01955148 |
| Igsf11      | 47.7469592 | 1.35752959 | 0.41153572 | 3.29869201 | 0.00097136 | 0.01424622 |
| Angpt2      | 55.6538296 | 1.35450222 | 0.38077488 | 3.55722575 | 0.00037479 | 0.00696343 |
| Gm7102      | 14.7627563 | 1.35306781 | 0.43087876 | 3.14025182 | 0.00168803 | 0.02133939 |
| Cend1       | 24.9213244 | 1.35235249 | 0.43001007 | 3.14493217 | 0.00166125 | 0.02112359 |
| Car6        | 88.4194384 | 1.35197303 | 0.36331598 | 3.7212044  | 0.00019827 | 0.00425193 |
| Gm15107     | 14.065321  | 1.34430758 | 0.43151441 | 3.11532488 | 0.00183742 | 0.02293241 |
| Rgag4       | 99.5754494 | 1.34350642 | 0.36856292 | 3.64525662 | 0.00026713 | 0.00533256 |
| Unc5cl      | 380.997913 | 1.34324751 | 0.28677141 | 4.6840357  | 2.81E-06   | 0.00013243 |
| Lama4       | 165.41525  | 1.34295528 | 0.32130215 | 4.17972698 | 2.92E-05   | 0.00090956 |
| 2310014L17F | 306.008828 | 1.34136394 | 0.35043143 | 3.82775012 | 0.00012932 | 0.00301507 |

|             |            |            |            |            |            |            |
|-------------|------------|------------|------------|------------|------------|------------|
| Antxr1      | 253.716208 | 1.34078683 | 0.29412294 | 4.55859316 | 5.15E-06   | 0.00021528 |
| Lhb         | 11.3706105 | 1.34056598 | 0.43048471 | 3.11408504 | 0.00184516 | 0.02301053 |
| Plcd4       | 380.756591 | 1.33924785 | 0.28794569 | 4.65104327 | 3.30E-06   | 0.00015061 |
| 1700001C19F | 64.8263211 | 1.33818165 | 0.3926424  | 3.40814354 | 0.00065406 | 0.01074063 |
| Slc39a14    | 628.067014 | 1.33791051 | 0.30762863 | 4.34910919 | 1.37E-05   | 0.00048826 |
| Pea15a      | 725.806665 | 1.33733929 | 0.20096834 | 6.65447757 | 2.84E-11   | 5.08E-09   |
| Cldn15      | 17.3701149 | 1.33566766 | 0.43062955 | 3.10166282 | 0.00192437 | 0.02378846 |
| Gata2       | 679.572158 | 1.3351192  | 0.34295283 | 3.89301114 | 9.90E-05   | 0.0024285  |
| Tmod2       | 830.126344 | 1.33435661 | 0.33716838 | 3.95753777 | 7.57E-05   | 0.0019627  |
| Jph2        | 15.4999033 | 1.33056877 | 0.43208206 | 3.07943537 | 0.00207393 | 0.02501868 |
| Mab21l2     | 9.32095325 | 1.32931665 | 0.4273867  | 3.11033699 | 0.00186874 | 0.0232584  |
| Ebf4        | 90.7941348 | 1.32922083 | 0.39948705 | 3.32731891 | 0.00087686 | 0.01329955 |
| Cdc14a      | 1538.81697 | 1.32910458 | 0.29155435 | 4.55868545 | 5.15E-06   | 0.00021528 |
| Pkhd1       | 352.334781 | 1.32746022 | 0.41292331 | 3.21478638 | 0.00130542 | 0.01772972 |
| Xist        | 32.8489037 | 1.32688814 | 0.42764593 | 3.10277274 | 0.00191717 | 0.02373717 |
| Grip1       | 270.321654 | 1.32566007 | 0.32043125 | 4.13711235 | 3.52E-05   | 0.00105586 |
| Rcsd1       | 287.108257 | 1.325425   | 0.321235   | 4.12602929 | 3.69E-05   | 0.00109534 |
| Pax6        | 26.8101566 | 1.32502253 | 0.4124056  | 3.2129111  | 0.00131397 | 0.0177683  |
| Cryge       | 123.986871 | 1.31833501 | 0.40213072 | 3.27837427 | 0.00104407 | 0.0150755  |
| Lin28b      | 1219.61361 | 1.31787471 | 0.321589   | 4.09800927 | 4.17E-05   | 0.00121356 |
| Gatm        | 41.9473695 | 1.31330543 | 0.38871727 | 3.37856205 | 0.00072866 | 0.01164583 |
| Smim5       | 15.9067378 | 1.31106538 | 0.432272   | 3.03296393 | 0.00242165 | 0.0280201  |
| Ret         | 111.877077 | 1.31100939 | 0.39604954 | 3.3102157  | 0.00093224 | 0.013873   |
| Efcab3      | 12.1388618 | 1.31084497 | 0.4182167  | 3.13436782 | NA         | NA         |
| Rasal3      | 148.325128 | 1.30599319 | 0.40036164 | 3.26203377 | 0.00110616 | 0.01576708 |
| Naa11       | 1405.67158 | 1.30185575 | 0.19126226 | 6.80665235 | 9.99E-12   | 1.94E-09   |
| Lhx2        | 375.95797  | 1.30118568 | 0.33124542 | 3.92816202 | 8.56E-05   | 0.00216482 |
| Fgl1        | 99.038097  | 1.298109   | 0.3051455  | 4.25406566 | 2.10E-05   | 0.0006931  |
| Cacna1s     | 30.5877059 | 1.2979108  | 0.42843199 | 3.02944419 | 0.00245004 | 0.0282618  |
| Col7a1      | 123.868634 | 1.29720862 | 0.29387842 | 4.41409966 | 1.01E-05   | 0.00037917 |
| Tat         | 202.718732 | 1.2962534  | 0.43035383 | 3.01206425 | 0.00259478 | 0.02930383 |
| Gip         | 26.9580334 | 1.29543377 | 0.42141052 | 3.07404234 | 0.00211179 | 0.02532037 |
| Bin1        | 1305.11666 | 1.2934885  | 0.3284921  | 3.93765478 | 8.23E-05   | 0.00210455 |
| Prox1       | 36.9606119 | 1.29255106 | 0.4040885  | 3.19868307 | 0.00138057 | 0.01850795 |
| Hus1b       | 183.487287 | 1.29229848 | 0.36822258 | 3.50955798 | 0.00044885 | 0.00798457 |
| Mir22hg     | 351.919795 | 1.29202115 | 0.25877452 | 4.99284532 | 5.95E-07   | 3.60E-05   |
| Scml2       | 1062.52585 | 1.29050194 | 0.35546634 | 3.63044769 | 0.00028293 | 0.00556238 |
| Adh1        | 227.984967 | 1.28863628 | 0.27508062 | 4.68457668 | 2.81E-06   | 0.00013243 |
| Map3k6      | 404.695016 | 1.28720967 | 0.23412102 | 5.49805251 | 3.84E-08   | 3.37E-06   |
| Slc43a2     | 1537.38836 | 1.28714688 | 0.27760224 | 4.63665879 | 3.54E-06   | 0.00015914 |
| Ica1l       | 83.9542444 | 1.28634753 | 0.30401152 | 4.23124606 | 2.32E-05   | 0.00075622 |

|             |            |            |            |            |            |            |
|-------------|------------|------------|------------|------------|------------|------------|
| Rhox2f      | 31.6670687 | 1.28598173 | 0.43214099 | 2.97583838 | 0.00292189 | 0.03213457 |
| Prss35      | 2551.25991 | 1.28556539 | 0.16919736 | 7.59802255 | 3.01E-14   | 1.20E-11   |
| Pde3a       | 22.2296368 | 1.28148793 | 0.42554519 | 3.01140268 | 0.00260044 | 0.02934283 |
| Mylpf       | 10647.6053 | 1.28087636 | 0.22715328 | 5.63881963 | 1.71E-08   | 1.67E-06   |
| Bag2        | 366.553309 | 1.27996852 | 0.2552163  | 5.01523028 | 5.30E-07   | 3.24E-05   |
| Cftr        | 12.558406  | 1.27972339 | 0.4207729  | 3.04136366 | 0.00235509 | 0.0274543  |
| Parva       | 888.123969 | 1.27708924 | 0.37391918 | 3.41541521 | 0.00063685 | 0.01052458 |
| Fam132a     | 338.015634 | 1.27473053 | 0.32612323 | 3.90873889 | 9.28E-05   | 0.00230481 |
| Hoxa10      | 191.628693 | 1.27288323 | 0.42142002 | 3.02046218 | 0.00252389 | 0.02877496 |
| Hic1        | 141.017714 | 1.27148926 | 0.39297164 | 3.23557507 | 0.00121398 | 0.01683797 |
| A630072M18  | 301.609767 | 1.27087659 | 0.26449458 | 4.80492487 | 1.55E-06   | 8.08E-05   |
| Fam20a      | 26.8250911 | 1.26817678 | 0.41509129 | 3.05517557 | 0.00224929 | 0.02657954 |
| Nanos3      | 218.528012 | 1.26772025 | 0.35813018 | 3.53983087 | 0.00040038 | 0.00730794 |
| Maats1      | 198.047799 | 1.26730932 | 0.31166284 | 4.06628299 | 4.78E-05   | 0.0013528  |
| 4930503E14F | 45.4641548 | 1.2669527  | 0.39055928 | 3.24394465 | 0.00117887 | 0.01656057 |
| Tm6sf2      | 45.21605   | 1.26466073 | 0.36959675 | 3.4217312  | 0.00062224 | 0.01030832 |
| Tagln       | 47.8264447 | 1.26382761 | 0.394572   | 3.20303421 | 0.00135988 | 0.01826206 |
| Ccrn4l      | 3736.59961 | 1.26363624 | 0.166544   | 7.58740195 | 3.26E-14   | 1.24E-11   |
| Plxnc1      | 190.83406  | 1.26179621 | 0.4115724  | 3.06579405 | 0.00217093 | 0.02590952 |
| Cpne2       | 640.917576 | 1.26106496 | 0.33368507 | 3.77920698 | 0.00015733 | 0.00351021 |
| D10Bwg1379  | 321.871124 | 1.25997243 | 0.29879095 | 4.21690298 | 2.48E-05   | 0.00078928 |
| Timp3       | 340.020096 | 1.25921488 | 0.38257304 | 3.2914365  | 0.00099677 | 0.01454108 |
| C2cd4b      | 83.5522079 | 1.25734443 | 0.30888434 | 4.07059945 | 4.69E-05   | 0.00133802 |
| Ptprn       | 89.2710735 | 1.25613412 | 0.33174778 | 3.78641304 | 0.00015284 | 0.0034671  |
| Mapk4       | 414.808044 | 1.25601575 | 0.30782978 | 4.08022823 | 4.50E-05   | 0.00129567 |
| Cyp26c1     | 9.57714554 | 1.25588501 | 0.42732958 | 2.93891432 | 0.00329364 | 0.03491439 |
| Slco1b2     | 20.3461637 | 1.25461593 | 0.43221886 | 2.90273298 | 0.00369922 | 0.03777187 |
| Reep1       | 5484.3374  | 1.2534379  | 0.26492327 | 4.73132432 | 2.23E-06   | 0.00010908 |
| Nr1i2       | 67.7755191 | 1.25322062 | 0.34068902 | 3.67848844 | 0.00023462 | 0.00481771 |
| Sdc3        | 854.687583 | 1.2514306  | 0.27167186 | 4.60640493 | 4.10E-06   | 0.000181   |
| 6030419C18F | 252.528556 | 1.25126723 | 0.39262214 | 3.18695022 | 0.00143782 | 0.01905746 |
| Lrrc4b      | 13.551895  | 1.24888431 | 0.4311944  | 2.89633704 | 0.00377547 | 0.03835929 |
| Plekhd1     | 1104.44166 | 1.24801196 | 0.23579398 | 5.29280661 | 1.20E-07   | 9.18E-06   |
| Gsap        | 50.5444041 | 1.24750171 | 0.42682868 | 2.92272236 | 0.00346986 | 0.03616167 |
| Hmga2       | 3965.72895 | 1.24408483 | 0.28942702 | 4.29844057 | 1.72E-05   | 0.00058402 |
| Rnf219      | 710.097356 | 1.24220433 | 0.27339807 | 4.54357383 | 5.53E-06   | 0.00022814 |
| H2-M3       | 102.815005 | 1.24138874 | 0.38236306 | 3.24662308 | 0.00116783 | 0.01644026 |
| Gm5124      | 87.3739997 | 1.24062967 | 0.31197464 | 3.97670035 | 6.99E-05   | 0.00183782 |
| Dusp14      | 1985.9881  | 1.23702877 | 0.25571277 | 4.8375713  | 1.31E-06   | 7.02E-05   |
| Samd14      | 63.6749344 | 1.23556749 | 0.35331804 | 3.49704044 | 0.00047045 | 0.00827907 |
| Actl7b      | 24.1217839 | 1.23209967 | 0.43108007 | 2.85816896 | 0.00426093 | 0.04162173 |

|              |            |            |            |            |            |            |
|--------------|------------|------------|------------|------------|------------|------------|
| Slc25a24     | 156.307264 | 1.23098205 | 0.38047652 | 3.23536933 | 0.00121485 | 0.01683797 |
| Trf          | 551.028613 | 1.22994571 | 0.38161062 | 3.22303845 | 0.00126839 | 0.01738655 |
| 4933412E12F  | 15.5623546 | 1.22958299 | 0.43227204 | 2.84446566 | 0.00444486 | 0.04299574 |
| Hsbp1l1      | 119.005796 | 1.22518773 | 0.34030179 | 3.60029768 | 0.00031785 | 0.00614029 |
| Slc25a20     | 8895.09912 | 1.22485802 | 0.26627867 | 4.59991038 | 4.23E-06   | 0.00018515 |
| Amn          | 59.3506468 | 1.22435588 | 0.36246307 | 3.37787758 | 0.00073048 | 0.01166287 |
| Mybpc1       | 209.877431 | 1.22370447 | 0.27920771 | 4.38277469 | 1.17E-05   | 0.00042876 |
| Ang          | 24.2069338 | 1.22269902 | 0.40774709 | 2.99867009 | 0.00271161 | 0.03035868 |
| Npr1         | 2347.00763 | 1.22248284 | 0.23799067 | 5.13668395 | 2.80E-07   | 1.85E-05   |
| Gm5          | 40.3507473 | 1.22199797 | 0.387726   | 3.15170502 | 0.0016232  | 0.02077565 |
| Fbxl7        | 39.8732669 | 1.22181807 | 0.42189155 | 2.89604775 | 0.00377895 | 0.03835929 |
| Pla2g4a      | 79.9479511 | 1.22160369 | 0.39534493 | 3.0899693  | 0.00200177 | 0.02445369 |
| Plin2        | 6051.50155 | 1.22063546 | 0.20254167 | 6.02658925 | 1.67E-09   | 2.15E-07   |
| Ttbk1        | 52.2381947 | 1.22037634 | 0.40845323 | 2.98779946 | 0.00280994 | 0.03125705 |
| Gpr20        | 41.1724941 | 1.22015384 | 0.38191536 | 3.19482785 | 0.00139914 | 0.01868178 |
| Aqp8         | 193.413022 | 1.21880632 | 0.37392373 | 3.25950512 | 0.00111607 | 0.0158502  |
| BC021785     | 9.20296244 | 1.2187866  | 0.4125659  | 2.95416221 | 0.00313519 | 0.0338344  |
| 6530402F18F  | 28.7268045 | 1.21873963 | 0.42698407 | 2.85429767 | 0.00431321 | 0.04202677 |
| Guca2a       | 18.5680357 | 1.21789721 | 0.43179033 | 2.82057547 | 0.00479376 | 0.04556709 |
| Snaaip       | 13.2243713 | 1.21777465 | 0.43174682 | 2.82057586 | 0.00479375 | 0.04556709 |
| Cst6         | 10.4868737 | 1.21726491 | 0.43054513 | 2.82726439 | 0.00469475 | 0.0449177  |
| Slc22a13b-ps | 52.0894122 | 1.21700917 | 0.36454041 | 3.33847539 | 0.00084239 | 0.01294475 |
| Nckap5       | 23.4468456 | 1.21426055 | 0.40944123 | 2.96565287 | 0.00302041 | 0.0329617  |
| Slc25a45     | 123.263089 | 1.21294838 | 0.31057795 | 3.90545554 | 9.40E-05   | 0.0023326  |
| Tbc1d5       | 1017.1603  | 1.21188688 | 0.2921034  | 4.14882844 | 3.34E-05   | 0.001017   |
| Bves         | 47.2816702 | 1.21151319 | 0.39112554 | 3.09750464 | 0.00195157 | 0.02401022 |
| Cdh2         | 486.577751 | 1.21093986 | 0.37094037 | 3.26451351 | 0.00109652 | 0.01568723 |
| Nckap1l      | 5306.40743 | 1.209935   | 0.24683806 | 4.90173592 | 9.50E-07   | 5.35E-05   |
| Rufy4        | 43.926141  | 1.20986086 | 0.39448066 | 3.06697132 | 0.0021624  | 0.02584736 |
| Rpgrip1      | 1309.97905 | 1.20778295 | 0.33129893 | 3.64559876 | 0.00026677 | 0.00533231 |
| Trim44       | 4012.52062 | 1.20763207 | 0.23800214 | 5.0740387  | 3.89E-07   | 2.47E-05   |
| Smim9        | 9.34610092 | 1.20700751 | 0.41767158 | 2.8898483  | 0.00385428 | 0.03889544 |
| Sh3bgrl      | 1383.16492 | 1.20640839 | 0.38716346 | 3.11601822 | 0.00183311 | 0.02289694 |
| B3galt5      | 24.7264919 | 1.20496361 | 0.43120183 | 2.79443064 | 0.00519912 | 0.04835616 |
| Rtn1         | 187.047663 | 1.20482779 | 0.37833782 | 3.18452909 | 0.0014499  | 0.01912918 |
| Tenm1        | 32.7336166 | 1.20471908 | 0.42985639 | 2.80260831 | 0.00506912 | 0.04743073 |
| Rhox4g       | 56.4251216 | 1.20316726 | 0.43222701 | 2.78364665 | 0.00537516 | 0.04975538 |
| Cst13        | 14.4694423 | 1.20302916 | 0.42333864 | 2.84176557 | NA         | NA         |
| Prss53       | 58.2052961 | 1.20179789 | 0.35325931 | 3.40202754 | 0.00066888 | 0.01088048 |
| Myh4         | 8.72002037 | 1.20089794 | 0.41853417 | 2.86929485 | 0.00411388 | 0.04055697 |
| Tnfaip8l2    | 83.9377878 | 1.19959002 | 0.3660822  | 3.27683242 | 0.00104979 | 0.01513016 |

|             |            |            |            |            |            |            |
|-------------|------------|------------|------------|------------|------------|------------|
| S100a6      | 533.673963 | 1.19852775 | 0.35407801 | 3.38492566 | 0.00071198 | 0.01143652 |
| Cplx1       | 52.2869481 | 1.1979575  | 0.40248398 | 2.97641041 | 0.00291644 | 0.03213457 |
| Meg3        | 13481.8788 | 1.19696366 | 0.23651201 | 5.06090017 | 4.17E-07   | 2.62E-05   |
| Ccdc152     | 81.7605012 | 1.19520298 | 0.42125195 | 2.83726393 | 0.0045502  | 0.04378721 |
| Xirp1       | 15.5191835 | 1.19295811 | 0.43200458 | 2.76144781 | 0.00575457 | 0.05230236 |
| Rltpr       | 813.767765 | 1.19224209 | 0.19936457 | 5.98021061 | 2.23E-09   | 2.73E-07   |
| Efnb3       | 452.338402 | 1.19029486 | 0.34975525 | 3.40322229 | 0.00066596 | 0.01085572 |
| Cxcl17      | 34.4761374 | 1.18876494 | 0.42896312 | 2.77125208 | 0.00558412 | 0.05125204 |
| Elf1        | 34.0930503 | 1.18772087 | 0.40625928 | 2.92355378 | 0.0034606  | 0.03614228 |
| Mmp2        | 535.875441 | 1.18762153 | 0.21994325 | 5.39967258 | 6.68E-08   | 5.38E-06   |
| Snx7        | 553.834903 | 1.18742111 | 0.29205509 | 4.06574355 | 4.79E-05   | 0.0013528  |
| Hoxc12      | 272.983201 | 1.18458466 | 0.2929695  | 4.04337192 | 5.27E-05   | 0.00144762 |
| Tceal7      | 53.4924412 | 1.1845494  | 0.37138912 | 3.18951026 | 0.00142514 | 0.01894219 |
| Npnt        | 712.055451 | 1.18383097 | 0.36192583 | 3.27092151 | 0.00107198 | 0.01539271 |
| Ptpdc1      | 307.632071 | 1.18378649 | 0.24510246 | 4.8297618  | 1.37E-06   | 7.28E-05   |
| A330102110R | 34.9637587 | 1.18378628 | 0.41189508 | 2.87399955 | 0.0040531  | 0.0401463  |
| Nat1        | 141.397087 | 1.18334814 | 0.3503952  | 3.37718134 | 0.00073233 | 0.01168044 |
| 1810019D21I | 140.068443 | 1.18330405 | 0.28533017 | 4.14713956 | 3.37E-05   | 0.00102252 |
| Hdgfrp3     | 1181.80009 | 1.18286215 | 0.28225223 | 4.19079831 | 2.78E-05   | 0.00086978 |
| Esx1        | 430.415101 | 1.18281376 | 0.36248205 | 3.26309606 | 0.00110202 | 0.01573695 |
| Col6a1      | 39.0577252 | 1.18280064 | 0.43152617 | 2.7409708  | 0.0061258  | 0.05446669 |
| Spef1       | 167.570674 | 1.18195353 | 0.31986425 | 3.69517235 | 0.00021974 | 0.00458088 |
| A330023F24F | 27.0731316 | 1.18079972 | 0.42008985 | 2.81082655 | 0.00494144 | 0.04654413 |
| Pde5a       | 433.402447 | 1.17987744 | 0.26690732 | 4.42055109 | 9.84E-06   | 0.00037341 |
| Tex13       | 611.702123 | 1.17911152 | 0.42967545 | 2.74419101 | 0.00606602 | 0.05418307 |
| B3gnt3      | 502.925454 | 1.17896755 | 0.35659377 | 3.30619226 | 0.00094573 | 0.01398576 |
| Il16        | 22.7914337 | 1.17845039 | 0.43225931 | 2.726258   | 0.00640569 | 0.05622586 |
| Bgn         | 68.9292689 | 1.17827076 | 0.43077254 | 2.73525037 | NA         | NA         |
| Wdr6        | 11574.5995 | 1.17773315 | 0.18249946 | 6.45335148 | 1.09E-10   | 1.75E-08   |
| Sycp1       | 363.778423 | 1.17768355 | 0.41554371 | 2.83407866 | 0.0045958  | 0.04408964 |
| Abcg4       | 48.2217889 | 1.17548563 | 0.37012488 | 3.17591627 | 0.00149364 | 0.01955148 |
| Asphd2      | 169.500518 | 1.1741721  | 0.35256233 | 3.33039579 | 0.00086723 | 0.01321222 |
| Elf1        | 1987.19729 | 1.17359198 | 0.26217553 | 4.47635974 | 7.59E-06   | 0.00029968 |
| Shd         | 25.6902927 | 1.17304936 | 0.40435522 | 2.90103678 | 0.0037193  | 0.03793426 |
| Trpa1       | 307.590573 | 1.17106995 | 0.31795192 | 3.68316679 | 0.00023035 | 0.00474875 |
| Samd9l      | 147.190718 | 1.17026049 | 0.42449058 | 2.75685858 | 0.00583596 | 0.05267266 |
| Boc         | 303.12825  | 1.16969694 | 0.25013033 | 4.67634995 | 2.92E-06   | 0.00013585 |
| Sycp3       | 1308.46136 | 1.16957917 | 0.36682605 | 3.18837542 | 0.00143075 | 0.01898425 |
| 9430018G01I | 22.8330226 | 1.16952096 | 0.42072938 | 2.77974635 | 0.00544014 | 0.05014794 |
| Nup62cl     | 3888.07561 | 1.16921917 | 0.32097012 | 3.6427664  | 0.00026972 | 0.00537064 |
| Zfp467      | 48.3308727 | 1.16918553 | 0.37884088 | 3.08621798 | 0.0020272  | 0.02468677 |



|             |            |            |            |            |            |            |
|-------------|------------|------------|------------|------------|------------|------------|
| Ptpn20      | 71.3343749 | 1.16789501 | 0.42198044 | 2.76765197 | 0.00564617 | 0.05158766 |
| Cd3d        | 1963.16047 | 1.16581448 | 0.43074561 | 2.70650348 | 0.00679959 | 0.05874465 |
| Tcp11       | 463.514627 | 1.16200972 | 0.40028091 | 2.90298562 | 0.00369624 | 0.03777187 |
| Ube2l6      | 1399.00743 | 1.15849168 | 0.31442318 | 3.68449836 | 0.00022915 | 0.00473249 |
| C7          | 16.0236106 | 1.15790217 | 0.4271034  | 2.7110582  | 0.00670689 | 0.05833265 |
| Ffar2       | 212.68543  | 1.15590686 | 0.39313642 | 2.9402182  | 0.00327981 | 0.03481526 |
| Wnt7b       | 226.853459 | 1.15391074 | 0.38646313 | 2.98582361 | 0.00282816 | 0.03139234 |
| Pelo        | 1112.83609 | 1.15299735 | 0.23709036 | 4.86311351 | 1.16E-06   | 6.28E-05   |
| Zfp287      | 123.631661 | 1.1527053  | 0.31231922 | 3.69079204 | 0.00022356 | 0.00464157 |
| Podn        | 87.3239177 | 1.15216847 | 0.39984161 | 2.88156219 | 0.00395709 | 0.03962162 |
| Ttll6       | 1216.16705 | 1.15190324 | 0.26837324 | 4.29216885 | 1.77E-05   | 0.00059816 |
| Clec4a3     | 17.9882823 | 1.15023927 | 0.42768219 | 2.68947198 | 0.00715652 | 0.06104826 |
| 5330411J11R | 330.714359 | 1.14983998 | 0.31815056 | 3.61413785 | 0.00030135 | 0.00585784 |
| Six3os1     | 19.0512744 | 1.14978101 | 0.42889907 | 2.68077296 | 0.00734523 | 0.06214675 |
| Pnma1       | 23.3707841 | 1.1496692  | 0.41401848 | 2.77685479 | 0.00548877 | 0.05054921 |
| A630095N17  | 34.1668262 | 1.14888583 | 0.39040309 | 2.94281955 | 0.00325238 | 0.03461858 |
| Spint1      | 7874.10312 | 1.14873842 | 0.19258745 | 5.96476256 | 2.45E-09   | 2.95E-07   |
| Nhlh1       | 32.8125492 | 1.14741136 | 0.42352168 | 2.70921516 | 0.00674426 | 0.05860383 |
| Eid1        | 1534.52956 | 1.14635442 | 0.21052017 | 5.4453425  | 5.17E-08   | 4.32E-06   |
| Hoxd9       | 231.402419 | 1.14565759 | 0.35458838 | 3.23095071 | 0.00123379 | 0.01697938 |
| Vav3        | 52.8866024 | 1.14527366 | 0.41768039 | 2.74198572 | 0.0061069  | 0.05439198 |
| Irf5        | 248.790445 | 1.14438473 | 0.4095737  | 2.79408742 | 0.00520464 | 0.04837858 |
| Asb14       | 25.9417765 | 1.14431092 | 0.42405674 | 2.69848537 | 0.00696558 | 0.05978021 |
| Smarca2     | 574.335141 | 1.14391502 | 0.38439079 | 2.9759168  | 0.00292114 | 0.03213457 |
| Ptprcap     | 95.3833552 | 1.14209268 | 0.37729438 | 3.02705991 | 0.00246945 | 0.02832037 |
| Naip1       | 18.5686578 | 1.14117112 | 0.43146063 | 2.64490209 | 0.00817146 | 0.06759272 |
| Prph        | 264.497545 | 1.14049265 | 0.30464667 | 3.74365707 | 0.00018136 | 0.00397232 |
| Cspg5       | 282.759479 | 1.13937008 | 0.39946517 | 2.85223889 | 0.00434125 | 0.04225868 |
| Eif4e1b     | 42.4945382 | 1.13928723 | 0.43227008 | 2.6355912  | 0.00839909 | 0.06864892 |
| Fam174b     | 557.089654 | 1.13857056 | 0.1894915  | 6.00855737 | 1.87E-09   | 2.35E-07   |
| Isl2        | 21.4437733 | 1.13731274 | 0.42064317 | 2.70374705 | 0.00685625 | 0.0591356  |
| Gm15455     | 125.182693 | 1.13318866 | 0.30481332 | 3.71764807 | 0.00020109 | 0.00430136 |
| Bco2        | 129.641947 | 1.13318134 | 0.41562999 | 2.72641862 | 0.00640257 | 0.05622586 |
| Csrnp1      | 1311.84125 | 1.13315612 | 0.19477894 | 5.81765202 | 5.97E-09   | 6.31E-07   |
| Hspb7       | 160.870168 | 1.13205408 | 0.36328639 | 3.11614782 | 0.0018323  | 0.02289694 |
| Mixl1       | 105.93962  | 1.13139189 | 0.3714441  | 3.04592778 | 0.00231964 | 0.02723305 |
| Disc1       | 38.3824706 | 1.12984309 | 0.38053767 | 2.96907031 | 0.00298702 | 0.0327121  |
| Gm14458     | 17.5762559 | 1.12915279 | 0.432267   | 2.61216513 | 0.00899708 | 0.071935   |
| Slc7a9      | 111.619919 | 1.12787905 | 0.36474963 | 3.09220063 | 0.00198679 | 0.02430881 |
| Irak4       | 626.382741 | 1.12750901 | 0.19282452 | 5.84733222 | 5.00E-09   | 5.49E-07   |
| 6430411K18F | 41.6518166 | 1.12556052 | 0.40906552 | 2.75154091 | 0.00593156 | 0.0532881  |

|             |            |            |            |            |            |            |
|-------------|------------|------------|------------|------------|------------|------------|
| Btk         | 227.845597 | 1.12408628 | 0.35273538 | 3.18676931 | 0.00143871 | 0.01905746 |
| Setd7       | 1441.15981 | 1.12297943 | 0.34499073 | 3.25510025 | 0.00113352 | 0.01605251 |
| AU015836    | 157.86862  | 1.12181543 | 0.39950168 | 2.8080368  | 0.00498445 | 0.04689246 |
| Vmn1r53     | 172.632803 | 1.12041455 | 0.38894195 | 2.88067293 | 0.00396827 | 0.03963429 |
| Ccdc160     | 1121.73375 | 1.11936112 | 0.25787519 | 4.34070881 | 1.42E-05   | 0.0005039  |
| Piwil2      | 1442.61835 | 1.11825379 | 0.34503641 | 3.24097333 | 0.00119122 | 0.01666516 |
| 1700013H16l | 5604.5119  | 1.11732106 | 0.42780513 | 2.61175239 | 0.00900795 | 0.07198488 |
| Arhgap9     | 1318.5589  | 1.11671244 | 0.22202278 | 5.0297202  | 4.91E-07   | 3.06E-05   |
| Igsf10      | 164.549092 | 1.11619342 | 0.33632007 | 3.31884273 | 0.00090391 | 0.0135683  |
| Rasl11a     | 79.9204811 | 1.11506598 | 0.3776314  | 2.95278939 | 0.00314917 | 0.03389114 |
| Mira        | 59.2432788 | 1.11170647 | 0.39433604 | 2.81918559 | 0.00481457 | 0.04566662 |
| Igll1       | 144.486593 | 1.10902588 | 0.34813037 | 3.18566256 | 0.00144423 | 0.01908174 |
| Slc27a3     | 2200.80024 | 1.10878192 | 0.23441401 | 4.73001566 | 2.25E-06   | 0.00010944 |
| Psemb9      | 129.996845 | 1.10866164 | 0.37756582 | 2.93634008 | 0.0033211  | 0.03512756 |
| Th          | 24.9136387 | 1.10782168 | 0.41501517 | 2.66935223 | 0.00759977 | 0.06393786 |
| Fzd9        | 429.385552 | 1.10711548 | 0.25636445 | 4.31852186 | 1.57E-05   | 0.00054403 |
| Hepacam     | 39.3542751 | 1.10675884 | 0.38267685 | 2.89214994 | 0.00382615 | 0.0386618  |
| 2210417A02f | 133.101512 | 1.1056223  | 0.34817991 | 3.17543391 | 0.00149613 | 0.01955148 |
| H2-Q10      | 197.875893 | 1.1051063  | 0.33427161 | 3.30601307 | 0.00094634 | 0.01398576 |
| Fkbp10      | 307.596807 | 1.10475018 | 0.23157246 | 4.77064588 | 1.84E-06   | 9.17E-05   |
| Tmsb15a     | 25.5701375 | 1.10467459 | 0.40465992 | 2.72988391 | 0.00633566 | 0.05577716 |
| Cpxm1       | 1558.6298  | 1.1044774  | 0.18948867 | 5.82872535 | 5.59E-09   | 5.99E-07   |
| Aard        | 1677.35458 | 1.10447077 | 0.33030612 | 3.34377928 | 0.00082645 | 0.01278825 |
| Sp140       | 41.5302738 | 1.10433527 | 0.40508218 | 2.72620057 | 0.00640681 | 0.05622586 |
| Peg10       | 2059.6608  | 1.10421777 | 0.43163416 | 2.5582261  | 0.01052077 | 0.07999426 |
| Nrp1        | 74.2754956 | 1.10124735 | 0.41995808 | 2.62227921 | 0.00873438 | 0.07048698 |
| Ldoc1       | 25.2623118 | 1.10075191 | 0.42841653 | 2.56934978 | 0.01018896 | 0.07863447 |
| Wfdc15a     | 105.13268  | 1.10050189 | 0.37497721 | 2.93485011 | 0.00333709 | 0.0351851  |
| Hoxd11      | 47.5862721 | 1.10034809 | 0.42234015 | 2.60535991 | 0.00917778 | 0.07289331 |
| Kctd8       | 14.1575644 | 1.09861278 | 0.42067466 | 2.61154971 | 0.00901329 | 0.07199057 |
| Adam33      | 32.0495124 | 1.09702669 | 0.41387756 | 2.65060685 | 0.00803473 | 0.06678145 |
| Atp6v1b1    | 38.3940778 | 1.09610194 | 0.42156253 | 2.60009338 | 0.00931984 | 0.07382402 |
| Mdk         | 7516.45971 | 1.09473887 | 0.20996247 | 5.21397398 | 1.85E-07   | 1.30E-05   |
| Cdrt4       | 19.1756968 | 1.09452557 | 0.43227225 | 2.5320283  | 0.01134048 | 0.08418971 |
| Pabpc6      | 141.794424 | 1.09350577 | 0.41237942 | 2.65169822 | 0.00800881 | 0.0666016  |
| Tdpoz1      | 11.135076  | 1.09294872 | 0.41421786 | 2.63858426 | 0.0083253  | 0.0682911  |
| Csmd2       | 23.9247372 | 1.0922238  | 0.41587474 | 2.6263288  | 0.00863114 | 0.07004594 |
| Al662270    | 2163.95778 | 1.09188115 | 0.28878561 | 3.78094033 | 0.00015624 | 0.00349087 |
| Arhgef16    | 584.512747 | 1.09173834 | 0.32488205 | 3.3604145  | 0.00077826 | 0.01223727 |
| Slc25a10    | 1103.84845 | 1.09022207 | 0.18450837 | 5.90879474 | 3.45E-09   | 3.94E-07   |
| Chst5       | 45.5255615 | 1.0895282  | 0.42742914 | 2.54902646 | 0.01080241 | 0.0813139  |

|           |            |            |            |            |            |            |
|-----------|------------|------------|------------|------------|------------|------------|
| Clcn5     | 799.348798 | 1.08897172 | 0.33456686 | 3.25487026 | 0.00113444 | 0.01605251 |
| Acot2     | 174.621272 | 1.0885485  | 0.27741458 | 3.92390523 | 8.71E-05   | 0.00218882 |
| Fads3     | 26.3590555 | 1.08799162 | 0.429632   | 2.53238032 | 0.0113291  | 0.08417529 |
| Yipf2     | 847.799705 | 1.08698825 | 0.20005993 | 5.43331309 | 5.53E-08   | 4.60E-06   |
| Tmem144   | 783.244775 | 1.08660392 | 0.24299721 | 4.47167239 | 7.76E-06   | 0.00030325 |
| Krtdap    | 109.144863 | 1.08450103 | 0.42914562 | 2.52711662 | 0.01150033 | 0.08475907 |
| Mirg      | 1197.85229 | 1.08397118 | 0.30308894 | 3.5764128  | 0.00034834 | 0.00658209 |
| Fhdc1     | 93.7254628 | 1.08359001 | 0.36523517 | 2.96682819 | 0.00300889 | 0.03288212 |
| Sox6      | 69.8162789 | 1.08316664 | 0.38661437 | 2.80167198 | 0.00508385 | 0.04753999 |
| Sox3      | 139.427445 | 1.08270405 | 0.42475414 | 2.54901354 | 0.01080281 | 0.0813139  |
| Vwce      | 67.0350193 | 1.08270059 | 0.33435019 | 3.23822339 | 0.00120277 | 0.01675001 |
| Rnf144b   | 361.83379  | 1.08028625 | 0.24805141 | 4.35509015 | 1.33E-05   | 0.00047771 |
| Cdk5r1    | 73.1561898 | 1.08027207 | 0.35706459 | 3.02542482 | 0.00248284 | 0.02844122 |
| Ctsk      | 39.3112225 | 1.0793065  | 0.42432554 | 2.5435813  | 0.01097225 | 0.08211236 |
| Gimap1    | 9.91936367 | 1.07830986 | 0.42939961 | 2.51120365 | 0.01203203 | 0.08747547 |
| Nrn1      | 22.5701359 | 1.07810352 | 0.42864881 | 2.51512074 | 0.01189916 | 0.08671222 |
| Gca       | 4785.47418 | 1.07745952 | 0.23665884 | 4.55279635 | 5.29E-06   | 0.00022071 |
| Lax1      | 438.445323 | 1.07686518 | 0.27428336 | 3.92610463 | 8.63E-05   | 0.00217595 |
| Mid1      | 3865.62856 | 1.07663164 | 0.4085348  | 2.63534866 | 0.00840509 | 0.06864892 |
| Dok2      | 212.080441 | 1.07621588 | 0.3042965  | 3.5367344  | 0.00040511 | 0.00738548 |
| Gm715     | 29.2238873 | 1.07602873 | 0.4189487  | 2.56840213 | 0.01021686 | 0.07875048 |
| Slc22a17  | 2670.25577 | 1.0759755  | 0.3291903  | 3.2685517  | 0.00108099 | 0.01549359 |
| Gsta3     | 1132.94641 | 1.07575822 | 0.32063632 | 3.35507286 | 0.00079344 | 0.01242578 |
| Rom1      | 98.7668622 | 1.07491389 | 0.34863556 | 3.08320212 | 0.00204786 | 0.0248799  |
| Nmb       | 401.196911 | 1.07465842 | 0.2399058  | 4.47950163 | 7.48E-06   | 0.00029757 |
| Myom1     | 44.7722572 | 1.07416328 | 0.37285574 | 2.8809085  | 0.00396531 | 0.03963014 |
| Trank1    | 411.70094  | 1.07339661 | 0.35214961 | 3.04812665 | 0.00230273 | 0.02706707 |
| Sohlh2    | 5529.00458 | 1.07268765 | 0.29371532 | 3.65213382 | 0.00026007 | 0.00523202 |
| Gm16861   | 23.5615094 | 1.07255947 | 0.41007534 | 2.6155181  | 0.00890922 | 0.07141612 |
| Lat2      | 79.7570632 | 1.07237532 | 0.33153709 | 3.23455614 | 0.00121832 | 0.01687096 |
| Vnn1      | 73.411946  | 1.07181048 | 0.42374616 | 2.52936917 | 0.01142678 | 0.08457773 |
| Stra8     | 9234.94811 | 1.07133393 | 0.41334857 | 2.59184139 | 0.00954638 | 0.07482647 |
| Klk15     | 14.2594738 | 1.07098484 | 0.43024669 | 2.48923436 | 0.01280185 | 0.09089998 |
| Cmya5     | 18.2188817 | 1.06945652 | 0.42862005 | 2.49511548 | 0.01259161 | 0.0900286  |
| Tshz1     | 122.471678 | 1.06846502 | 0.30337836 | 3.52188941 | 0.00042848 | 0.00772113 |
| Zfp651    | 330.051389 | 1.06750332 | 0.23517573 | 4.53917292 | 5.65E-06   | 0.00023112 |
| Camk2n2   | 232.312105 | 1.06685299 | 0.24781655 | 4.30501103 | 1.67E-05   | 0.0005707  |
| Mlf1      | 152.626087 | 1.06676752 | 0.35352207 | 3.01754147 | 0.00254834 | 0.02893785 |
| Hivep2    | 441.045349 | 1.0664097  | 0.37798437 | 2.82130636 | 0.00478285 | 0.04551904 |
| Best3     | 20.22468   | 1.06505628 | 0.42493247 | 2.50641303 | 0.01219631 | 0.08825721 |
| Ppp1r3fos | 29.5667773 | 1.06429652 | 0.41618278 | 2.55728147 | 0.01054938 | 0.08010422 |

|             |            |            |            |            |            |            |
|-------------|------------|------------|------------|------------|------------|------------|
| Gxylt2      | 42.4534144 | 1.06406769 | 0.42790155 | 2.48671148 | 0.01289299 | 0.0913851  |
| Ccdc177     | 23.0812988 | 1.06346236 | 0.43116183 | 2.46650396 | 0.01364392 | 0.09531744 |
| Clstn2      | 16.1971761 | 1.06337089 | 0.43219581 | 2.46039148 | 0.01387855 | 0.09617887 |
| Ikbke       | 312.87948  | 1.0628451  | 0.37622635 | 2.82501501 | 0.00472784 | 0.04510592 |
| Nbl1        | 40.4333042 | 1.06257991 | 0.41637674 | 2.55196752 | 0.01071165 | 0.08096552 |
| Nipal4      | 51.9413254 | 1.06227148 | 0.36437563 | 2.91531978 | 0.00355324 | 0.03683765 |
| 9130008F23F | 22.6141509 | 1.06203372 | 0.4270315  | 2.48701492 | 0.012882   | 0.09134883 |
| Arpc1b      | 12310.9058 | 1.06183208 | 0.19249102 | 5.51626827 | 3.46E-08   | 3.13E-06   |
| Tchh        | 664.899555 | 1.06175109 | 0.40235004 | 2.63887404 | 0.00831819 | 0.0682911  |
| 1110019D14I | 731.4741   | 1.06160386 | 0.20347409 | 5.21739073 | 1.81E-07   | 1.29E-05   |
| Prob1       | 76.7487237 | 1.06148867 | 0.31941736 | 3.32320281 | 0.0008899  | 0.01342276 |
| Map1lc3a    | 1861.58103 | 1.0598967  | 0.21698999 | 4.88454194 | 1.04E-06   | 5.78E-05   |
| Npff        | 36.095154  | 1.05656423 | 0.37759738 | 2.79812381 | 0.00514004 | 0.04789509 |
| Itga5       | 5863.8855  | 1.05654679 | 0.36885743 | 2.86437717 | 0.0041783  | 0.04099481 |
| Parp12      | 1061.88094 | 1.05553788 | 0.27075796 | 3.89845554 | 9.68E-05   | 0.00238963 |
| Stox2       | 882.105099 | 1.05511273 | 0.31085994 | 3.39417405 | 0.00068836 | 0.01111671 |
| Lcat        | 44.9195042 | 1.05253417 | 0.38521413 | 2.73233533 | 0.00628871 | 0.05550268 |
| Gpr83       | 17.7521201 | 1.05221123 | 0.430473   | 2.4443141  | 0.01451279 | 0.0993907  |
| 1810010H24I | 82.4933452 | 1.05124078 | 0.34540734 | 3.04348127 | 0.00233858 | 0.0273328  |
| Gm13125     | 16.5800187 | 1.0512337  | 0.43010889 | 2.4441106  | 0.01452097 | 0.0993907  |
| Srgap1      | 1157.64462 | 1.0509276  | 0.28436092 | 3.69575253 | 0.00021924 | 0.00458088 |
| 4921531C22F | 49.9089671 | 1.05054552 | 0.37159285 | 2.82714138 | 0.00469656 | 0.0449177  |
| Dgat2       | 283.320414 | 1.05004652 | 0.38036375 | 2.76063776 | 0.00576886 | 0.05240162 |
| Ptpv        | 1254.37928 | 1.04885117 | 0.26582525 | 3.94564165 | 7.96E-05   | 0.00204909 |
| Tusc1       | 153.363573 | 1.04740909 | 0.3003246  | 3.48759005 | 0.00048739 | 0.00845924 |
| Pros1       | 6140.76847 | 1.04705777 | 0.35079882 | 2.98478136 | 0.00283781 | 0.03143219 |
| Phldb2      | 1346.75645 | 1.04583065 | 0.30364865 | 3.44421313 | 0.00057272 | 0.00962857 |
| Specc1      | 871.826906 | 1.04543405 | 0.29879259 | 3.49886204 | 0.00046725 | 0.0082383  |
| Plxna2      | 1033.1406  | 1.04371999 | 0.29387607 | 3.55156506 | 0.00038295 | 0.00706206 |
| Mlana       | 279.945567 | 1.04355175 | 0.26557961 | 3.9293369  | 8.52E-05   | 0.00216091 |
| Tmem179     | 41.5370551 | 1.04303301 | 0.40348794 | 2.58504133 | 0.00973673 | 0.07593577 |
| Vrtn        | 37.37359   | 1.04299624 | 0.42881868 | 2.4322547  | 0.01500515 | 0.10149853 |
| Slc2a6      | 71.6447357 | 1.04181316 | 0.40183636 | 2.59263036 | 0.00952451 | 0.0746927  |
| Btg2        | 7033.62065 | 1.04099428 | 0.1890047  | 5.50776926 | 3.63E-08   | 3.25E-06   |
| Foxd1       | 134.798412 | 1.04089344 | 0.42023685 | 2.47692091 | 0.01325213 | 0.09312418 |
| Asb11       | 64.065595  | 1.03991924 | 0.38959275 | 2.66924692 | 0.00760215 | 0.06393786 |
| Trpv5       | 10.8487956 | 1.03801508 | 0.39100122 | 2.65476172 | NA         | NA         |
| Gfap        | 16.9165673 | 1.03800298 | 0.43018872 | 2.41290143 | 0.0158261  | 0.10540114 |
| Srrd        | 960.443842 | 1.03715876 | 0.22105754 | 4.69180443 | 2.71E-06   | 0.00012918 |
| Adh4        | 25.5751637 | 1.03599114 | 0.40153863 | 2.58005347 | 0.0098785  | 0.07677191 |
| 4930447C04F | 966.537031 | 1.03594702 | 0.35537641 | 2.91506975 | 0.00355609 | 0.03684261 |

|             |            |            |            |            |            |            |
|-------------|------------|------------|------------|------------|------------|------------|
| Magee1      | 269.321165 | 1.03592771 | 0.25013349 | 4.14149945 | 3.45E-05   | 0.00104239 |
| 4933408B17F | 55.3564616 | 1.03455526 | 0.37371914 | 2.76826938 | 0.00563549 | 0.05155143 |
| Ribc2       | 22.7866605 | 1.03342212 | 0.41664249 | 2.480357   | 0.01312509 | 0.09256078 |
| St14        | 9915.40101 | 1.03322646 | 0.20383575 | 5.06891682 | 4.00E-07   | 2.53E-05   |
| Tcf7l2      | 705.38542  | 1.03207084 | 0.2498621  | 4.13056178 | 3.62E-05   | 0.00108015 |
| Ncoa7       | 760.086427 | 1.03200204 | 0.34133887 | 3.02339442 | 0.00249956 | 0.02856039 |
| B2m         | 3249.17212 | 1.03156567 | 0.24699818 | 4.17641    | 2.96E-05   | 0.00091703 |
| Mmp19       | 440.20025  | 1.03024144 | 0.2723089  | 3.7833558  | 0.00015473 | 0.00347211 |
| Arx         | 12.8844683 | 1.02997653 | 0.42964787 | 2.39725741 | 0.01651831 | 0.10849241 |
| Hc          | 72.2874713 | 1.02991398 | 0.38984311 | 2.6418679  | 0.00824502 | 0.06794823 |
| 4930563E22F | 88.0274221 | 1.02936709 | 0.33916886 | 3.03496932 | 0.0024056  | 0.02791754 |
| Cryga       | 94.9517558 | 1.02662121 | 0.3571003  | 2.87488194 | 0.00404179 | 0.04011092 |
| Tanc2       | 466.656856 | 1.02539552 | 0.2865117  | 3.5788958  | 0.00034505 | 0.00654373 |
| Cebpe       | 21.580533  | 1.02472927 | 0.43219914 | 2.37096553 | 0.01774169 | 0.11405579 |
| Ltk         | 867.196163 | 1.02461018 | 0.28815986 | 3.55570056 | 0.00037697 | 0.00698485 |
| Dlx2        | 23.0821417 | 1.02453135 | 0.43140427 | 2.3748753  | 0.01755488 | 0.11322934 |
| Htra1       | 5484.6798  | 1.02358788 | 0.43157326 | 2.37175929 | 0.01770362 | 0.11385814 |
| AU040972    | 82.0893427 | 1.02353462 | 0.39367365 | 2.59995713 | 0.00932354 | 0.07382402 |
| Rbm47       | 1150.00495 | 1.02221452 | 0.22255458 | 4.59309577 | 4.37E-06   | 0.00018898 |
| Dlk2        | 15.823452  | 1.02159765 | 0.43185958 | 2.36557829 | 0.01800194 | 0.11529988 |
| Gpr143      | 93.3586427 | 1.02139612 | 0.32354552 | 3.1568854  | 0.00159464 | 0.02048849 |
| Pde8b       | 154.396838 | 1.02136693 | 0.29610972 | 3.44928534 | 0.00056207 | 0.00949054 |
| Ptprq       | 6.74724893 | 1.02132564 | 0.4181215  | 2.44265274 | 0.01457976 | 0.09966146 |
| Egr4        | 17.8509351 | 1.02107255 | 0.43173586 | 2.36503995 | 0.01802813 | 0.11537259 |
| Inpp4b      | 8.96130566 | 1.02081819 | 0.39753849 | 2.56784742 | 0.01023322 | 0.07875048 |
| Tpm2        | 666.25021  | 1.0207298  | 0.34831952 | 2.93044098 | 0.00338481 | 0.03554168 |
| Slc7a15     | 7.65608539 | 1.02049881 | 0.40711633 | 2.50665163 | 0.01218808 | 0.08825721 |
| Sort1       | 2043.31771 | 1.01970898 | 0.23998106 | 4.24912277 | 2.15E-05   | 0.00070409 |
| Hmga2-ps1   | 41.4228652 | 1.01964476 | 0.4303173  | 2.36951842 | 0.01781127 | 0.11436128 |
| Xkr6        | 23.715775  | 1.01923699 | 0.42347773 | 2.40682546 | 0.01609186 | 0.10653235 |
| 9330020H09I | 81.1404205 | 1.01897188 | 0.35841714 | 2.84297756 | 0.00446942 | 0.04317017 |
| Scap        | 2986.28277 | 1.01861658 | 0.22617016 | 4.50376213 | 6.68E-06   | 0.00026758 |
| Wnt8a       | 10.2230872 | 1.01826816 | 0.41429254 | 2.45784814 | 0.01397723 | 0.09673336 |
| 1700010I14R | 69.9861615 | 1.01803784 | 0.35291054 | 2.8846909  | 0.00391798 | 0.03943956 |
| Arhgap10    | 1065.2569  | 1.01799573 | 0.33760075 | 3.01538346 | 0.00256655 | 0.02909063 |
| Nrip2       | 9.72683835 | 1.01752246 | 0.41401792 | 2.45767733 | 0.01398388 | 0.09673632 |
| P2rx1       | 56.5027534 | 1.01543706 | 0.37111951 | 2.7361457  | 0.00621635 | 0.05492639 |
| Klhl34      | 168.456354 | 1.01426745 | 0.37047906 | 2.73771869 | 0.0061867  | 0.05478638 |
| Vit         | 24.8305035 | 1.0139925  | 0.43151103 | 2.3498646  | 0.01878024 | 0.11844095 |
| Spsb4       | 54.8692936 | 1.01312223 | 0.35671389 | 2.84015359 | 0.00450918 | 0.04341937 |
| Trp53inp2   | 2896.38536 | 1.01244384 | 0.28186631 | 3.59192926 | 0.00032824 | 0.00630957 |

|             |            |            |            |            |            |            |
|-------------|------------|------------|------------|------------|------------|------------|
| E030030I06R | 166.606142 | 1.01175173 | 0.34299214 | 2.94978104 | 0.00317999 | 0.03410659 |
| Gm3230      | 18.7975003 | 1.01168282 | 0.42652664 | 2.37191001 | 0.0176964  | 0.11385814 |
| Tas1r1      | 209.701243 | 1.01109243 | 0.25058577 | 4.03491553 | 5.46E-05   | 0.00149022 |
| Serping1    | 1760.97257 | 1.01108537 | 0.2460456  | 4.10934145 | 3.97E-05   | 0.00116865 |
| Aspa        | 1877.05246 | 1.0092371  | 0.43156044 | 2.3385765  | 0.01935736 | 0.12094269 |
| Ssh2        | 2012.00188 | 1.00885321 | 0.25370935 | 3.97641322 | 7.00E-05   | 0.00183782 |
| Gm694       | 295.642033 | 1.00750964 | 0.34654245 | 2.90731959 | 0.00364541 | 0.03746841 |
| Scarf1      | 482.662276 | 1.00544588 | 0.32392476 | 3.10394885 | 0.00190956 | 0.02366185 |
| Aqp7        | 27.2219453 | 1.00515446 | 0.41690921 | 2.41096724 | 0.01591028 | 0.10573319 |
| Wnk4        | 65.8567417 | 1.00458616 | 0.33350213 | 3.01223313 | 0.00259333 | 0.02930383 |
| Cdkn2d      | 55.4401447 | 1.00097958 | 0.34808568 | 2.87567009 | 0.00403171 | 0.04005276 |
| Tmem198     | 56.3033415 | 1.00093685 | 0.38017462 | 2.6328345  | 0.00846756 | 0.06908658 |
| Oxct2b      | 8.53225938 | 1.00083447 | 0.40953146 | 2.44385248 | 0.01453137 | 0.09941808 |
| Tssk6       | 9.51894633 | 1.00081383 | 0.42635535 | 2.34737015 | 0.01890646 | 0.11898599 |
| Tcp11l2     | 318.493789 | 1.00067512 | 0.27527822 | 3.63514092 | 0.00027783 | 0.00548289 |
| 1700003F12F | 12.5314603 | 1.00066434 | 0.4317574  | 2.31765417 | 0.02046812 | 0.12575418 |
| Coch        | 193.262353 | 1.00001274 | 0.41364688 | 2.41755175 | 0.01562531 | 0.104332   |
| Gdf7        | 25.7373795 | 0.99991934 | 0.43054074 | 2.32247321 | 0.02020747 | 0.12479998 |
| Zscan4d     | 74.2747239 | 0.99989193 | 0.43223878 | 2.31328602 | 0.02070692 | 0.12673885 |
| Cndp2       | 22401.0064 | 0.99898729 | 0.25929614 | 3.85268861 | 0.00011683 | 0.00276528 |
| Spata45     | 10.6453329 | 0.99888946 | 0.40359137 | 2.47500201 | 0.01332354 | 0.09358375 |
| Saa3        | 1351.03377 | 0.9985613  | 0.37835836 | 2.63919448 | 0.00831033 | 0.0682911  |
| Fgd6        | 1618.16153 | 0.99819929 | 0.31957939 | 3.12347828 | 0.00178727 | 0.02241439 |
| Cited2      | 3189.42782 | 0.99774669 | 0.30489291 | 3.27244967 | 0.0010662  | 0.01533807 |
| Mfsd7c      | 733.764727 | 0.99767556 | 0.32314324 | 3.08740963 | 0.00201909 | 0.02460728 |
| Agap2       | 48.7545522 | 0.99755367 | 0.3982392  | 2.50491082 | 0.01224823 | 0.08848489 |
| Grap        | 43.1637476 | 0.99655639 | 0.43227129 | 2.30539575 | 0.02114442 | 0.12859479 |
| Adcy7       | 64.356704  | 0.99471281 | 0.40418597 | 2.46102754 | 0.01385397 | 0.09609417 |
| Rhoc        | 1701.27827 | 0.99349715 | 0.29011295 | 3.42451841 | 0.00061589 | 0.01024628 |
| Gm6583      | 11.277428  | 0.99230569 | 0.42290766 | 2.34638856 | 0.01895633 | 0.11916009 |
| Emilin2     | 139.698702 | 0.99215958 | 0.34610255 | 2.86666361 | 0.00414824 | 0.04075667 |
| Itga1       | 25.3807251 | 0.99215012 | 0.42124003 | 2.35530823 | 0.01850735 | 0.11732888 |
| Cyp1b1      | 46.5653953 | 0.99144866 | 0.42665197 | 2.32378785 | NA         | NA         |
| Mfsd2b      | 285.951317 | 0.99077308 | 0.2458683  | 4.02969016 | 5.59E-05   | 0.00151312 |
| A630001G21  | 119.952735 | 0.99072495 | 0.33738803 | 2.93645555 | 0.00331986 | 0.03512756 |
| Arhgef6     | 190.043097 | 0.9905339  | 0.34740505 | 2.85123633 | 0.00435496 | 0.04227463 |
| Scn1b       | 361.198981 | 0.98949135 | 0.21544702 | 4.59273626 | 4.37E-06   | 0.00018898 |
| Hpse        | 268.553883 | 0.98878719 | 0.41715202 | 2.37032815 | 0.0177723  | 0.11420541 |
| Slc5a8      | 13.7247713 | 0.98862861 | 0.43160703 | 2.29057577 | 0.02198796 | 0.13131136 |
| Tlr2        | 677.81859  | 0.9877732  | 0.20745923 | 4.76128818 | 1.92E-06   | 9.50E-05   |
| Mael        | 302.092925 | 0.985651   | 0.36849464 | 2.67480419 | 0.00747729 | 0.06311104 |

|          |            |            |            |            |            |            |
|----------|------------|------------|------------|------------|------------|------------|
| Tmem151a | 34.3022013 | 0.98564496 | 0.39724349 | 2.48121107 | 0.01309368 | 0.09249001 |
| Tmem88   | 222.616317 | 0.98535313 | 0.28228956 | 3.49057594 | 0.00048198 | 0.00840866 |
| Fam83h   | 535.971305 | 0.98523361 | 0.27732389 | 3.55264602 | 0.00038138 | 0.0070437  |
| Efna5    | 143.376942 | 0.98521998 | 0.39536984 | 2.4918946  | 0.01270637 | 0.09048042 |
| Parp9    | 1703.10948 | 0.9850896  | 0.25114025 | 3.92246803 | 8.76E-05   | 0.00219837 |
| Qrich2   | 43.9052549 | 0.98478448 | 0.39143087 | 2.51585801 | 0.0118743  | 0.08670295 |
| Xlr      | 204.930274 | 0.9839882  | 0.39429278 | 2.49557754 | 0.01257523 | 0.08995278 |
| Aadac    | 36.6547564 | 0.98373377 | 0.41462346 | 2.37259555 | 0.01766359 | 0.11369476 |
| Akr1c12  | 13.3396387 | 0.9831469  | 0.42170865 | 2.33134156 | 0.01973536 | 0.12261467 |
| Vash2    | 190.285694 | 0.98310933 | 0.35654711 | 2.75730557 | 0.00582799 | 0.05265658 |
| Ptger1   | 6.78011836 | 0.98274701 | 0.41564946 | 2.36436492 | 0.01806101 | 0.11548799 |
| Scgb3a1  | 19.1968408 | 0.98136147 | 0.42624486 | 2.30234207 | 0.02131589 | 0.12914425 |
| Foxl2    | 37.3346232 | 0.98120118 | 0.43218377 | 2.27033323 | 0.02318737 | 0.13612187 |
| Fam179a  | 13.19885   | 0.98085195 | 0.42534193 | 2.30603167 | 0.02110886 | 0.12859479 |
| Lysmd2   | 265.518678 | 0.98052881 | 0.28886269 | 3.39444598 | 0.00068768 | 0.01111671 |
| Slc35d3  | 58.6079559 | 0.98045413 | 0.38215015 | 2.56562539 | 0.010299   | 0.07897423 |
| AA415398 | 33.0390711 | 0.98032475 | 0.40894416 | 2.39720934 | 0.01652048 | 0.10849241 |
| Tmem54   | 8.35183406 | 0.97993587 | 0.4140366  | 2.3667856  | 0.01794332 | 0.11501922 |
| Stk32a   | 60.067736  | 0.97982301 | 0.41165921 | 2.38017997 | 0.01730418 | 0.11196948 |
| Lpxn     | 21.5163353 | 0.97885113 | 0.41839768 | 2.3395233  | 0.01930837 | 0.12075076 |
| B3gnt6   | 19.2865403 | 0.97881689 | 0.43102146 | 2.27092381 | 0.02315159 | 0.13596314 |
| Tmem253  | 140.08091  | 0.97865363 | 0.32884983 | 2.97598951 | 0.00292045 | 0.03213457 |
| Cdh24    | 456.596142 | 0.97865352 | 0.25850968 | 3.78575199 | 0.00015324 | 0.0034671  |
| Sct      | 47.8118966 | 0.97864037 | 0.42241886 | 2.3167535  | 0.02051716 | 0.12577215 |
| Ephx4    | 43.9510585 | 0.97795754 | 0.41782775 | 2.34057584 | 0.01925403 | 0.12063633 |
| Grm8     | 55.99507   | 0.97734801 | 0.43210535 | 2.26182808 | 0.02370803 | 0.13792874 |
| Limch1   | 262.364466 | 0.97657712 | 0.27887456 | 3.50185083 | 0.00046204 | 0.00816495 |
| Lgals1   | 4381.56661 | 0.97649667 | 0.28997905 | 3.3674732  | 0.0007586  | 0.01198559 |
| Prmt2    | 186.538208 | 0.97614897 | 0.26754693 | 3.64851496 | 0.00026376 | 0.00528575 |
| Htra4    | 23.8895407 | 0.97594811 | 0.40925036 | 2.38472146 | 0.01709206 | 0.11102697 |
| Crygc    | 89.4176517 | 0.97541932 | 0.43103681 | 2.2629606  | 0.02363812 | 0.13757349 |
| Galnt6   | 9401.15268 | 0.97450949 | 0.37501774 | 2.59856908 | 0.00936132 | 0.07382763 |
| Gm6268   | 6.44746692 | 0.97442464 | 0.40819837 | 2.38713505 | 0.01698025 | 0.1103468  |
| Daam2    | 6.82630785 | 0.97396505 | 0.41533823 | 2.34499254 | 0.01902746 | 0.11950567 |
| Lyl1     | 14.9992958 | 0.9734834  | 0.43226522 | 2.25205117 | 0.02431904 | 0.14006865 |
| Hoxa7    | 44.184265  | 0.97259117 | 0.39942947 | 2.43495097 | 0.01489381 | 0.10106267 |
| Tuba3b   | 407.344636 | 0.97243084 | 0.37861759 | 2.56837205 | 0.01021774 | 0.07875048 |
| Gc       | 808.115509 | 0.9715796  | 0.42014233 | 2.3125011  | 0.02075008 | 0.12684142 |
| Plcg2    | 5766.12765 | 0.97154184 | 0.24451559 | 3.97333291 | 7.09E-05   | 0.00185862 |
| Tlr3     | 21.0818044 | 0.97147163 | 0.42551374 | 2.28305584 | 0.02242708 | 0.13303641 |
| Fcgr2b   | 379.247723 | 0.9711586  | 0.37107544 | 2.61714598 | 0.00886684 | 0.07126008 |

|              |            |            |            |            |            |            |
|--------------|------------|------------|------------|------------|------------|------------|
| 1700042G15I  | 38.7127788 | 0.97082556 | 0.43045129 | 2.2553668  | 0.02411031 | 0.13922744 |
| Arhgap31     | 37.423217  | 0.97016405 | 0.39424762 | 2.46079875 | 0.01386281 | 0.0961126  |
| Tap1         | 394.158863 | 0.97013765 | 0.35283322 | 2.7495644  | 0.00596745 | 0.05348696 |
| Ggn          | 11.0564142 | 0.97004488 | 0.43106398 | 2.25035011 | 0.02442673 | 0.14048079 |
| Lats2        | 442.57694  | 0.96873031 | 0.34283465 | 2.82564882 | 0.0047185  | 0.04507882 |
| Efemp1       | 111.149685 | 0.96871029 | 0.38877755 | 2.4916827  | 0.01271396 | 0.09048042 |
| Mras         | 4168.85806 | 0.96731648 | 0.18350231 | 5.27141312 | 1.35E-07   | 9.98E-06   |
| Hoxb13       | 191.726122 | 0.96722165 | 0.36883362 | 2.62237931 | 0.00873182 | 0.07048698 |
| D730001G18   | 38.0444874 | 0.96694945 | 0.38662239 | 2.50101771 | 0.0123837  | 0.0891569  |
| Celf3        | 18.9983044 | 0.96632848 | 0.43197158 | 2.23701863 | 0.02528512 | 0.14352754 |
| Vpreb1       | 164.569566 | 0.96572402 | 0.30093432 | 3.20908572 | 0.00133158 | 0.01795956 |
| Cnksr2       | 112.172286 | 0.96524693 | 0.39594463 | 2.43783312 | 0.01477559 | 0.10047016 |
| I830077J02Ri | 14.9096247 | 0.96384256 | 0.43101627 | 2.23620923 | 0.02533807 | 0.14362693 |
| Cryaa        | 7.84872568 | 0.96264861 | 0.42053311 | 2.28911489 | 0.02207268 | 0.13171612 |
| Pcsk1n       | 100.638577 | 0.96258592 | 0.30788888 | 3.12640688 | 0.00176957 | 0.02222333 |
| F8           | 107.725041 | 0.9625049  | 0.34558963 | 2.78510933 | 0.00535097 | 0.04959052 |
| Arhgef33     | 115.959696 | 0.96243783 | 0.31056928 | 3.09894731 | 0.0019421  | 0.0239526  |
| Tmem42       | 158.456736 | 0.96230758 | 0.2657819  | 3.6206663  | 0.00029385 | 0.00575541 |
| Lacc1        | 603.729752 | 0.96152787 | 0.37456101 | 2.56707946 | 0.01025591 | 0.07876795 |
| Tmem56       | 198.59609  | 0.96148223 | 0.41168611 | 2.33547408 | 0.01951867 | 0.12165724 |
| Prr15        | 64.5881426 | 0.95967352 | 0.41827423 | 2.29436443 | 0.02176957 | 0.13055868 |
| Dkk1         | 53.8602977 | 0.95940149 | 0.42337628 | 2.26607285 | 0.02344692 | 0.13676785 |
| Spsb2        | 297.812267 | 0.95669134 | 0.28392906 | 3.36947312 | 0.00075312 | 0.01191432 |
| 4930550L24F  | 201.771991 | 0.95663238 | 0.27216257 | 3.51493003 | 0.00043987 | 0.00786255 |
| Ccdc109b     | 10.591275  | 0.95619447 | 0.40230402 | 2.37679569 | 0.01746376 | 0.11278194 |
| Mmp14        | 884.580218 | 0.9556372  | 0.25109653 | 3.80585581 | 0.00014131 | 0.00327253 |
| Lhx5         | 7.70288873 | 0.95522445 | 0.42282802 | 2.25913233 | 0.02387515 | 0.13838335 |
| Ddx4         | 801.089375 | 0.95519422 | 0.336189   | 2.8412417  | 0.00449382 | 0.0432983  |
| Cd68         | 2308.63611 | 0.95507833 | 0.27381811 | 3.48800272 | 0.00048664 | 0.00845563 |
| Hoxc9        | 47.2872119 | 0.95456546 | 0.39423672 | 2.42130023 | 0.0154651  | 0.10349545 |
| Cldn19       | 268.289194 | 0.95424988 | 0.3872052  | 2.46445521 | 0.01372217 | 0.09547055 |
| Dyrk1b       | 499.552188 | 0.95378597 | 0.2434366  | 3.91800559 | 8.93E-05   | 0.00223226 |
| Casr         | 195.145481 | 0.95296028 | 0.35848449 | 2.65830268 | 0.00785353 | 0.06555571 |
| Sox4         | 374.007672 | 0.95215982 | 0.28650149 | 3.3234027  | 0.00088926 | 0.01342276 |
| Elovl7       | 3342.38279 | 0.95208059 | 0.16566062 | 5.74717512 | 9.07E-09   | 9.28E-07   |
| Col5a2       | 299.097796 | 0.95191095 | 0.41004144 | 2.32149937 | 0.02025991 | 0.12502454 |
| 1110006O24I  | 37.7839157 | 0.95152541 | 0.39713701 | 2.39596259 | 0.01657678 | 0.10881618 |
| Il13ra1      | 1169.97951 | 0.95152233 | 0.24038671 | 3.95829848 | 7.55E-05   | 0.00195973 |
| Dsg3         | 9.27536498 | 0.95142322 | 0.42369291 | 2.24554907 | 0.02473291 | 0.1416315  |
| Ppp1r18      | 2057.05435 | 0.95132341 | 0.19771238 | 4.81165327 | 1.50E-06   | 7.89E-05   |
| Fgfr3        | 124.381564 | 0.95008399 | 0.43113008 | 2.20370609 | 0.02754502 | 0.15125446 |



|             |            |            |            |            |            |            |
|-------------|------------|------------|------------|------------|------------|------------|
| Fam214a     | 1026.84585 | 0.94979851 | 0.20914879 | 4.54125743 | 5.59E-06   | 0.00022945 |
| Slit1       | 46.8240174 | 0.94943106 | 0.38555753 | 2.46248869 | 0.01379765 | 0.09574623 |
| Cln6        | 1710.21609 | 0.94922178 | 0.22391177 | 4.23926702 | 2.24E-05   | 0.00073417 |
| Sgce        | 120.781654 | 0.94755554 | 0.40746874 | 2.32546772 | 0.02004696 | 0.12425283 |
| Pdgfrb      | 353.419977 | 0.94753823 | 0.37503602 | 2.52652595 | 0.01151969 | 0.08486152 |
| Gja6        | 10.0291721 | 0.94711796 | 0.42123678 | 2.2484218  | 0.02454931 | 0.14102928 |
| Dnaic2      | 332.264603 | 0.94708812 | 0.33163232 | 2.85583785 | 0.00429234 | 0.04190221 |
| Slc28a3     | 136.502405 | 0.94674314 | 0.42599895 | 2.22240719 | 0.0262558  | 0.14655561 |
| Al317395    | 62.2828389 | 0.94575266 | 0.42868173 | 2.2061884  | 0.02737081 | 0.15061694 |
| Ube2cbp     | 524.114284 | 0.94573289 | 0.23228142 | 4.07149611 | 4.67E-05   | 0.00133779 |
| Unc79       | 6.92164177 | 0.94571212 | 0.4178547  | 2.26325593 | 0.02361992 | 0.13751903 |
| Helz2       | 126.142251 | 0.94563366 | 0.30714479 | 3.07878786 | 0.00207845 | 0.02503634 |
| Zbp1        | 146.6293   | 0.94558792 | 0.36984579 | 2.55670863 | 0.01056677 | 0.08019708 |
| Col9a2      | 3098.43186 | 0.94499559 | 0.42411268 | 2.22817105 | 0.02586911 | 0.14538871 |
| Fgfbp3      | 120.662175 | 0.9444933  | 0.35450127 | 2.66428749 | 0.00771516 | 0.06464356 |
| Hoxd8       | 149.257191 | 0.94421591 | 0.36370627 | 2.59609467 | 0.00942901 | 0.07413069 |
| Pkp1        | 6.2983623  | 0.94335607 | 0.41481779 | 2.27414563 | 0.02295723 | 0.1351279  |
| Miat        | 25.0212342 | 0.94303557 | 0.4267097  | 2.2100167  | 0.027104   | 0.14948249 |
| Smyd1       | 660.562232 | 0.94229843 | 0.2865683  | 3.2882159  | 0.00100824 | 0.01466718 |
| Cyp4v3      | 10.9257591 | 0.94191211 | 0.43129766 | 2.18390264 | 0.0289694  | 0.15607012 |
| Gm3143      | 105.719772 | 0.94151136 | 0.38442859 | 2.44911898 | 0.01432061 | 0.09845545 |
| Slc2a2      | 9.98612848 | 0.94138226 | 0.4209522  | 2.23631627 | 0.02533106 | 0.14362693 |
| Msl3l2      | 288.009561 | 0.9409623  | 0.33181089 | 2.83583911 | 0.00457055 | 0.04395582 |
| Jph4        | 42.7163419 | 0.93953762 | 0.40496342 | 2.32005552 | 0.02033787 | 0.12530677 |
| Rab9b       | 8.30388869 | 0.93894838 | 0.41594059 | 2.25740985 | 0.02398248 | 0.13873104 |
| Cyr61       | 1364.49304 | 0.93861902 | 0.38596458 | 2.43187863 | 0.01502074 | 0.10155979 |
| 3100003L05F | 7.65432952 | 0.93687109 | 0.40612612 | 2.30684766 | 0.02106331 | 0.12840282 |
| Aoah        | 1877.3786  | 0.93670302 | 0.31602455 | 2.96401978 | 0.00303649 | 0.03302127 |
| Cap2        | 741.606903 | 0.93650064 | 0.39188319 | 2.38974433 | 0.0168601  | 0.10998951 |
| Car5b       | 238.100103 | 0.93622833 | 0.34216687 | 2.73617471 | 0.0062158  | 0.05492639 |
| Kctd4       | 7.35975277 | 0.9357929  | 0.41549541 | 2.25223405 | 0.02430749 | 0.14005398 |
| MacroD2     | 709.243558 | 0.93469577 | 0.26140917 | 3.57560431 | 0.00034942 | 0.00658646 |
| Adam8       | 85.5539588 | 0.93459074 | 0.31304128 | 2.98551913 | 0.00283097 | 0.0314012  |
| Dbn1        | 233.511899 | 0.93448379 | 0.27890744 | 3.35051584 | 0.00080661 | 0.01257677 |
| Rian        | 18236.717  | 0.93424719 | 0.22764805 | 4.10391028 | 4.06E-05   | 0.00118778 |
| Bmp15       | 37.0869945 | 0.93413448 | 0.42667273 | 2.18934657 | 0.02857166 | 0.1549824  |
| Ophn1       | 499.932735 | 0.93298111 | 0.220614   | 4.22902032 | 2.35E-05   | 0.00076042 |
| Pcdhgb5     | 50.0467831 | 0.93239953 | 0.40141758 | 2.32276704 | 0.02019167 | 0.12475195 |
| Gpr153      | 220.404795 | 0.93105342 | 0.30528487 | 3.04978567 | 0.00229005 | 0.02697919 |
| Trim30d     | 28.5140076 | 0.93090581 | 0.41412062 | 2.24790983 | NA         | NA         |
| Dcaf12l1    | 1085.56906 | 0.93016659 | 0.319863   | 2.90801557 | 0.0036373  | 0.03740985 |

|             |            |            |            |            |            |            |
|-------------|------------|------------|------------|------------|------------|------------|
| Aamdc       | 1151.07429 | 0.92968142 | 0.28927287 | 3.2138562  | 0.00130965 | 0.01773421 |
| Slc25a40    | 1686.52539 | 0.9283713  | 0.229707   | 4.0415456  | 5.31E-05   | 0.00145636 |
| Six2        | 25.1510653 | 0.92815413 | 0.42930061 | 2.16201444 | 0.03061706 | 0.16156293 |
| Mbnl3       | 423.037199 | 0.92786799 | 0.35112367 | 2.64256747 | 0.00822801 | 0.0679215  |
| Ube2a       | 4710.63612 | 0.9274715  | 0.15577567 | 5.953892   | 2.62E-09   | 3.08E-07   |
| Pik3cd      | 1581.67149 | 0.92703687 | 0.24019847 | 3.85946209 | 0.00011364 | 0.00269797 |
| B930059L03F | 37.2288489 | 0.92682713 | 0.41727928 | 2.22111945 | 0.02634287 | 0.14672565 |
| Als2cr11    | 40.8225038 | 0.92662153 | 0.413753   | 2.23955238 | 0.02512    | 0.14298722 |
| Tbx18       | 369.295264 | 0.92626681 | 0.35694867 | 2.59495798 | 0.00946025 | 0.07433872 |
| Romo1       | 1813.91285 | 0.92602246 | 0.24469163 | 3.78444683 | 0.00015405 | 0.0034671  |
| 9130023H24I | 208.118872 | 0.92586916 | 0.26498861 | 3.49399605 | 0.00047585 | 0.00833324 |
| Topaz1      | 58.5281363 | 0.92454179 | 0.37975044 | 2.4346036  | 0.01490811 | 0.10106267 |
| Clmp        | 788.461171 | 0.92453116 | 0.36131703 | 2.55878102 | 0.01050399 | 0.07998991 |
| Oprl1       | 52.5920763 | 0.92433186 | 0.38800977 | 2.3822386  | 0.01720774 | 0.11162749 |
| Wdr64       | 237.288106 | 0.9241534  | 0.36002529 | 2.56691248 | 0.01026085 | 0.07876795 |
| Fndc5       | 63.4382257 | 0.92339617 | 0.40849946 | 2.26045872 | 0.0237928  | 0.13819502 |
| Slc6a12     | 26.5504318 | 0.92333504 | 0.41901906 | 2.20356336 | 0.02755507 | 0.15125621 |
| Slc16a4     | 95.0658676 | 0.92330016 | 0.42559234 | 2.16944728 | 0.03004874 | 0.15962936 |
| Traf3ip3    | 23.0929085 | 0.92257465 | 0.43215344 | 2.13483122 | 0.0327748  | 0.16899234 |
| Galnt16     | 942.358948 | 0.92252773 | 0.38091797 | 2.42185407 | 0.01544155 | 0.10346038 |
| Agbl2       | 82.5148301 | 0.92135606 | 0.37712041 | 2.44313495 | 0.01456029 | 0.09957216 |
| Ctsf        | 1695.75168 | 0.9212565  | 0.34010033 | 2.70877861 | 0.00675314 | 0.05860383 |
| Bcl2        | 22.092674  | 0.92079037 | 0.42454248 | 2.16890046 | 0.03009024 | 0.15970422 |
| Kcns1       | 16.8471677 | 0.92035368 | 0.42804422 | 2.15013691 | 0.03154439 | 0.16500059 |
| Gpc4        | 3371.19653 | 0.91988491 | 0.22626682 | 4.06548733 | 4.79E-05   | 0.0013528  |
| Tgfb2       | 44.8134452 | 0.91969272 | 0.40020534 | 2.29805212 | 0.02155882 | 0.12989588 |
| Ccdc122     | 110.01205  | 0.91953105 | 0.36774417 | 2.50046397 | 0.01240307 | 0.08917065 |
| Plcx1       | 137.685694 | 0.91870795 | 0.31055614 | 2.9582669  | 0.00309374 | 0.03345672 |
| Btn1a1      | 24.3062364 | 0.91846422 | 0.42841175 | 2.14388196 | 0.03204235 | 0.1664297  |
| Eva1b       | 1178.25943 | 0.91742785 | 0.25674728 | 3.57327195 | 0.00035255 | 0.00662114 |
| Synm        | 613.351033 | 0.91705248 | 0.32233154 | 2.84505972 | 0.00444031 | 0.04294232 |
| Nefl        | 3036.4386  | 0.91646966 | 0.3316018  | 2.7637656  | 0.00571386 | 0.05199309 |
| Atg14       | 7536.77231 | 0.91643706 | 0.19210997 | 4.77037743 | 1.84E-06   | 9.17E-05   |
| Scn11a      | 14.3236077 | 0.91548261 | 0.43144792 | 2.12188441 | 0.03384745 | 0.17252102 |
| Cfh         | 244.502321 | 0.91548184 | 0.28893466 | 3.16847358 | 0.00153242 | 0.01985579 |
| Cdh18       | 17.3791961 | 0.91547041 | 0.42476696 | 2.15522983 | 0.03114385 | 0.16325438 |
| Adcy10      | 6.50384311 | 0.91546287 | 0.4039077  | 2.26651501 | 0.02341987 | 0.13671261 |
| Nefh        | 2534.93637 | 0.91485183 | 0.29990607 | 3.0504612  | 0.0022849  | 0.02693898 |
| Slmo1       | 192.780335 | 0.91456472 | 0.37505278 | 2.43849603 | 0.01474852 | 0.10046178 |
| Atp8b1      | 35.6898796 | 0.91439146 | 0.42285353 | 2.16243071 | 0.03058499 | 0.16144848 |
| Slc30a2     | 3051.64214 | 0.91427824 | 0.28296504 | 3.23106427 | 0.0012333  | 0.01697938 |

|             |            |            |            |            |            |            |
|-------------|------------|------------|------------|------------|------------|------------|
| Sidt2       | 4055.98326 | 0.91419534 | 0.19810326 | 4.61474147 | 3.94E-06   | 0.00017455 |
| Isoc2b      | 79.9507678 | 0.91416439 | 0.41180408 | 2.21990123 | 0.02642547 | 0.14692261 |
| Gm4984      | 133.522166 | 0.91346139 | 0.29665264 | 3.07922895 | 0.00207537 | 0.02501868 |
| Ceacam10    | 270.510047 | 0.91277008 | 0.38151781 | 2.39247042 | 0.01673538 | 0.10950542 |
| Gm15910     | 20.5152378 | 0.91273755 | 0.42569632 | 2.14410485 | 0.03202449 | 0.1664297  |
| Gm10548     | 8.95129553 | 0.9126924  | 0.4281479  | 2.13172226 | 0.03302969 | 0.16974377 |
| Rasgrf2     | 27.7785487 | 0.91169955 | 0.43035058 | 2.11850433 | 0.03413238 | 0.17343717 |
| Prrt2       | 282.561717 | 0.91147511 | 0.30658664 | 2.97297723 | 0.00294926 | 0.03241272 |
| Ccdc79      | 55.6777338 | 0.91062333 | 0.41936924 | 2.17141183 | 0.02990006 | 0.15907484 |
| Rnd1        | 920.54846  | 0.91053743 | 0.25042226 | 3.63600832 | 0.0002769  | 0.00547141 |
| Bmp8a       | 117.868539 | 0.91006178 | 0.36695236 | 2.4800543  | 0.01313624 | 0.09256078 |
| Tmem30b     | 337.357939 | 0.90986941 | 0.31541629 | 2.88466204 | 0.00391834 | 0.03943956 |
| Gm10767     | 60.9567275 | 0.90984049 | 0.36923894 | 2.4640968  | 0.0137359  | 0.09547055 |
| Mmp28       | 41.0366862 | 0.90837027 | 0.39395173 | 2.30579077 | 0.02112233 | 0.12859479 |
| Gstt1       | 108.435421 | 0.90803578 | 0.43097922 | 2.10691314 | NA         | NA         |
| Akap5       | 338.912747 | 0.90761942 | 0.27579691 | 3.29089765 | 0.00099868 | 0.0145553  |
| Tnfrsf8     | 585.692063 | 0.90741663 | 0.35460246 | 2.5589688  | 0.01049832 | 0.07998991 |
| Gsdmd       | 952.524141 | 0.90726493 | 0.24470232 | 3.70762706 | 0.00020921 | 0.00444458 |
| Bpifb5      | 231.593714 | 0.90691296 | 0.30585475 | 2.96517533 | 0.0030251  | 0.03298976 |
| Dlk1        | 77.4406482 | 0.90613893 | 0.43217237 | 2.09670723 | 0.0360195  | 0.18008508 |
| Timd4       | 8.66003807 | 0.90492036 | 0.4246045  | 2.13120764 | 0.03307204 | 0.16974956 |
| 0610038B21F | 8.31371787 | 0.90477207 | 0.41959439 | 2.15630162 | 0.03106012 | 0.16312595 |
| Rab36       | 31.2900746 | 0.90468998 | 0.40427256 | 2.23782186 | 0.02523267 | 0.14341894 |
| Arl14ep1    | 8704.11605 | 0.90174589 | 0.19754047 | 4.56486666 | 5.00E-06   | 0.00021064 |
| Fam212b     | 245.481267 | 0.90131391 | 0.32773321 | 2.75014518 | 0.00595689 | 0.05342303 |
| Zfhx2       | 4925.17398 | 0.90103403 | 0.24907605 | 3.61750569 | 0.00029746 | 0.00580393 |
| Rragd       | 4963.81962 | 0.90089393 | 0.18539081 | 4.85943136 | 1.18E-06   | 6.36E-05   |
| Ankrd45     | 2320.72275 | 0.90027922 | 0.3753125  | 2.39874565 | 0.01645134 | 0.10826693 |
| Cox8c       | 10.9275915 | 0.89975544 | 0.43171968 | 2.08411961 | 0.03714929 | 0.18276134 |
| 1600014K23F | 8.60064632 | 0.89964771 | 0.42803224 | 2.10182233 | 0.03556884 | 0.17860945 |
| Fbxo4       | 152.430813 | 0.89934986 | 0.29156264 | 3.08458544 | 0.00203836 | 0.02480324 |
| Adam12      | 32.2585154 | 0.89915192 | 0.43005604 | 2.09077849 | 0.03654792 | 0.18129403 |
| Drd4        | 21.0255766 | 0.89863295 | 0.43076594 | 2.08612816 | 0.03696702 | 0.18247163 |
| Syt11       | 520.3323   | 0.89860182 | 0.2441461  | 3.68059055 | 0.00023269 | 0.00478655 |
| Rab13       | 474.246455 | 0.89822628 | 0.21397696 | 4.19777105 | 2.70E-05   | 0.00084855 |
| Slc30a4     | 430.675561 | 0.89740383 | 0.23467994 | 3.82394767 | 0.00013133 | 0.0030574  |
| Abca12      | 11.9227634 | 0.89711154 | 0.42961266 | 2.08818691 | 0.03678098 | 0.18215955 |
| Slc30a1     | 2372.85837 | 0.89605209 | 0.1879243  | 4.76815458 | 1.86E-06   | 9.24E-05   |
| Fam184b     | 59.3986434 | 0.8957796  | 0.35612896 | 2.51532365 | 0.01189232 | 0.08670295 |
| 1700030F18F | 21.4769926 | 0.89537475 | 0.42646783 | 2.09951298 | 0.0357717  | 0.17921578 |
| Hapln3      | 175.265446 | 0.89524845 | 0.35246898 | 2.5399354  | 0.01108729 | 0.08281389 |

|             |            |            |            |            |            |            |
|-------------|------------|------------|------------|------------|------------|------------|
| Ntf5        | 329.02729  | 0.89522862 | 0.23565578 | 3.79888252 | 0.00014535 | 0.00334369 |
| Lrp4        | 1362.06626 | 0.89419319 | 0.23979806 | 3.72894257 | 0.00019228 | 0.00416373 |
| Thbs2       | 40.3958008 | 0.89343677 | 0.43202422 | 2.06802476 | 0.0386377  | 0.18764984 |
| Spata22     | 127.06786  | 0.89303709 | 0.37076013 | 2.40866537 | 0.01601097 | 0.10608718 |
| Sag         | 18.039329  | 0.89259539 | 0.42656609 | 2.09251369 | 0.03639259 | 0.18092748 |
| Plip        | 76.004035  | 0.89216094 | 0.41590867 | 2.14508858 | 0.03194577 | 0.16631691 |
| Hdc         | 15.7712609 | 0.89201808 | 0.43197207 | 2.0649902  | 0.03892393 | 0.18833006 |
| Tlx1        | 91.4723018 | 0.89185032 | 0.36339969 | 2.45418569 | 0.0141204  | 0.09750729 |
| Tgfb1i1     | 11.2624071 | 0.89143569 | 0.43157693 | 2.06553136 | 0.03887275 | 0.18832092 |
| Cib1        | 4083.91856 | 0.89137477 | 0.21907214 | 4.06886404 | 4.72E-05   | 0.00134556 |
| Nr0b2       | 23.052778  | 0.89051898 | 0.43019504 | 2.07003544 | 0.03844903 | 0.18720125 |
| Agrp        | 99.8730516 | 0.8903893  | 0.35397525 | 2.51539986 | 0.01188974 | 0.08670295 |
| Ms4a5       | 15.6101476 | 0.89007061 | 0.43190115 | 2.06082018 | 0.0393202  | 0.18954383 |
| Phlda1      | 145.562741 | 0.88916666 | 0.39847927 | 2.23140005 | 0.02565464 | 0.14481137 |
| Gm867       | 325.345906 | 0.88910687 | 0.26704008 | 3.32948848 | 0.00087006 | 0.01323899 |
| AA543401    | 30.9610427 | 0.88867991 | 0.40780572 | 2.17917473 | 0.02931869 | 0.15701257 |
| Hmgn3       | 266.606526 | 0.88828911 | 0.37137251 | 2.39190864 | 0.01676101 | 0.10956306 |
| Abca3       | 1515.45337 | 0.88826615 | 0.35845583 | 2.47803515 | 0.01321081 | 0.09291784 |
| Ambp        | 26.4778531 | 0.88506936 | 0.43208999 | 2.04834496 | 0.04052621 | 0.19278773 |
| Cyp4f39     | 578.882813 | 0.88471999 | 0.30460132 | 2.90451792 | 0.00367819 | 0.03768087 |
| Hsf5        | 111.183423 | 0.88458018 | 0.39749236 | 2.2254017  | 0.02605428 | 0.14612821 |
| Hoxa11      | 14.2287051 | 0.88400018 | 0.41507532 | 2.12973439 | 0.03319355 | 0.17019217 |
| H2-Oa       | 166.977621 | 0.88379082 | 0.38568978 | 2.29145508 | 0.02193711 | 0.13110836 |
| Serpina3n   | 36.4499045 | 0.88312809 | 0.39468469 | 2.23755347 | NA         | NA         |
| Gpx1        | 43210.6959 | 0.88268001 | 0.22624939 | 3.90135857 | 9.57E-05   | 0.0023649  |
| Hap1        | 11735.1363 | 0.88256959 | 0.16872199 | 5.23091041 | 1.69E-07   | 1.21E-05   |
| BC020402    | 67.6114609 | 0.88239807 | 0.39695681 | 2.22290698 | 0.02622207 | 0.14641991 |
| Fos         | 210.005262 | 0.88201595 | 0.42380728 | 2.08117225 | 0.03741814 | 0.18361929 |
| Gm8267      | 17.0306704 | 0.88190078 | 0.42769464 | 2.06198701 | 0.03920897 | 0.1891836  |
| AA792892    | 28.1828103 | 0.88055467 | 0.41402613 | 2.12680939 | 0.03343592 | 0.17115275 |
| Trim62      | 254.137911 | 0.87993838 | 0.42169572 | 2.08666664 | 0.03691828 | 0.18247163 |
| Opalin      | 4.61808845 | 0.87963247 | 0.37157867 | 2.36728462 | 0.01791915 | NA         |
| Mns1        | 2328.54237 | 0.87960617 | 0.281644   | 3.12311353 | 0.00178949 | 0.0224241  |
| Ppef1       | 31.8891425 | 0.87839024 | 0.42614561 | 2.06124436 | 0.03927973 | 0.18946623 |
| C130046K22f | 95.4058577 | 0.8783615  | 0.43222376 | 2.03219164 | 0.04213426 | 0.19725327 |
| Itga10      | 194.212956 | 0.87829392 | 0.27934233 | 3.14414905 | 0.00166571 | 0.02114562 |
| Tnnt1       | 357.87034  | 0.87813392 | 0.29328941 | 2.99408666 | 0.00275268 | 0.03073    |
| Henmt1      | 9.19669239 | 0.87653319 | 0.42137253 | 2.08018588 | 0.03750849 | 0.18394509 |
| Sox18       | 118.256093 | 0.87608593 | 0.39560607 | 2.21454119 | 0.02679157 | 0.14837455 |
| Rnasek      | 2496.76926 | 0.87585093 | 0.16702646 | 5.24378557 | 1.57E-07   | 1.14E-05   |
| Fzd6        | 682.731217 | 0.87450576 | 0.28818377 | 3.03454201 | 0.00240901 | 0.02792043 |

|             |            |            |            |            |            |            |
|-------------|------------|------------|------------|------------|------------|------------|
| Batf        | 46.1121658 | 0.87370159 | 0.37374408 | 2.33770017 | 0.01940281 | 0.12112929 |
| Mbl2        | 74.4562674 | 0.87369439 | 0.39853415 | 2.1922698  | 0.02836003 | 0.15439601 |
| Zglp1       | 190.702256 | 0.8730922  | 0.28219134 | 3.09397235 | 0.00197496 | 0.02422128 |
| Antxr2      | 7.33774518 | 0.87303891 | 0.41640036 | 2.09663343 | 0.03602604 | 0.18008508 |
| Paqr6       | 62.6811666 | 0.8730235  | 0.39458257 | 2.21252424 | 0.02693046 | 0.14882574 |
| Robo4       | 51.7269841 | 0.87219672 | 0.42655232 | 2.04475903 | 0.04087862 | 0.19369391 |
| Col6a2      | 14.5011986 | 0.87215069 | 0.4000411  | 2.18015273 | NA         | NA         |
| Rab39b      | 55.5973432 | 0.8712632  | 0.38661617 | 2.2535612  | 0.02422379 | 0.13982331 |
| D630045M09  | 1347.27322 | 0.87098467 | 0.2975871  | 2.92682261 | 0.00342444 | 0.03587691 |
| Afp         | 5.57135853 | 0.87052972 | 0.36954863 | 2.35565676 | 0.01848999 | NA         |
| 1700030C10F | 1214.55442 | 0.87048423 | 0.35772534 | 2.43338712 | 0.0149583  | 0.1012697  |
| Zfp36l3     | 18.3883403 | 0.87038512 | 0.43044701 | 2.02204942 | 0.04317125 | 0.20028522 |
| Hoxa3       | 46.3142527 | 0.8702991  | 0.43225107 | 2.01341107 | 0.0440714  | 0.20288762 |
| Itln1       | 10.3706774 | 0.86995456 | 0.42142576 | 2.06431273 | 0.03898807 | 0.18837864 |
| Cdh20       | 145.638585 | 0.86969336 | 0.37422919 | 2.32395918 | 0.02012768 | 0.12460413 |
| Gjb2        | 30.1328867 | 0.86964287 | 0.39700581 | 2.19050412 | 0.0284877  | 0.15479111 |
| Ctsg        | 10.8836369 | 0.8694213  | 0.43146406 | 2.01504916 | 0.0438995  | 0.20227588 |
| Pappa       | 6.4047072  | 0.86937547 | 0.3784854  | 2.29698547 | 0.0216196  | 0.13008842 |
| Gm20324     | 59.1231171 | 0.86909657 | 0.34007356 | 2.55561348 | 0.01060008 | 0.08037144 |
| Mroh6       | 30.767877  | 0.86863854 | 0.4251079  | 2.04333661 | 0.04101913 | 0.19406403 |
| B3gnt8      | 29.4949792 | 0.86850899 | 0.42039999 | 2.06591107 | 0.03883688 | 0.18832092 |
| 1700088E04F | 32.4872209 | 0.86811971 | 0.41941243 | 2.06984737 | 0.03846664 | 0.18722839 |
| Trim72      | 19.1529913 | 0.86708974 | 0.42085529 | 2.06030378 | 0.03936951 | 0.18954651 |
| Josd2       | 344.113171 | 0.86690427 | 0.25487085 | 3.40134723 | 0.00067055 | 0.0108962  |
| 4933424G05I | 6.35214604 | 0.8666557  | 0.41404961 | 2.09312042 | 0.03633841 | 0.18083154 |
| Gm5134      | 272.529514 | 0.8660979  | 0.25921257 | 3.34126503 | 0.00083398 | 0.01284075 |
| Gab2        | 166.060974 | 0.8656835  | 0.40346837 | 2.1456044  | 0.03190455 | 0.16626934 |
| Basp1       | 1301.97394 | 0.86534252 | 0.26028964 | 3.32453685 | 0.00088566 | 0.01339769 |
| Wnt10a      | 8.86144843 | 0.86528136 | 0.42468104 | 2.03748525 | 0.04160144 | 0.19562866 |
| Nfasc       | 413.517648 | 0.86473702 | 0.36213392 | 2.38789288 | 0.01694528 | 0.11024069 |
| Cacng8      | 24.9747422 | 0.8646974  | 0.41391759 | 2.0890569  | 0.0367026  | 0.18188724 |
| Zfpm2       | 28.8196305 | 0.86467228 | 0.43175011 | 2.00271466 | 0.04520792 | 0.20622717 |
| Muc13       | 41.946644  | 0.86431801 | 0.40829765 | 2.11688215 | 0.03426985 | 0.17376278 |
| Gm41        | 38.9887158 | 0.86418145 | 0.39509731 | 2.18726232 | 0.02872338 | 0.15542836 |
| Ephx3       | 101.446735 | 0.86417504 | 0.32914845 | 2.62548722 | 0.00865251 | 0.07008079 |
| Fbxl17      | 813.84068  | 0.86391523 | 0.1862439  | 4.63862303 | 3.51E-06   | 0.0001581  |
| Slc16a6     | 3795.9944  | 0.86363075 | 0.19298375 | 4.47514752 | 7.64E-06   | 0.00029986 |
| Slco2a1     | 329.479587 | 0.86315353 | 0.28512672 | 3.02726282 | 0.00246779 | 0.02832037 |
| Camk2a      | 378.103382 | 0.86302214 | 0.3242832  | 2.6613224  | 0.00778344 | 0.06511041 |
| Hist1h1c    | 86.2846786 | 0.86216348 | 0.32572701 | 2.64688972 | 0.00812358 | 0.06734001 |
| Lrrc75a     | 682.718144 | 0.86104834 | 0.34338037 | 2.50756427 | 0.01215665 | 0.08817538 |

|             |            |            |            |            |            |            |
|-------------|------------|------------|------------|------------|------------|------------|
| Crygd       | 247.126401 | 0.8600766  | 0.41637129 | 2.0656482  | 0.03886171 | 0.18832092 |
| A230028O05  | 73.2297692 | 0.85998376 | 0.38064927 | 2.25925501 | 0.02386753 | 0.13838335 |
| Gpr64       | 73.2323735 | 0.85930125 | 0.38523651 | 2.23058105 | 0.02570889 | 0.14501233 |
| Dnah7b      | 20.7365719 | 0.85907834 | 0.41080538 | 2.09120516 | NA         | NA         |
| Abhd11os    | 231.4411   | 0.85875972 | 0.29827204 | 2.87911577 | 0.00398792 | 0.03980496 |
| Fam161a     | 1040.77081 | 0.85871834 | 0.21328612 | 4.02613317 | 5.67E-05   | 0.00153351 |
| Cybb        | 36.2390025 | 0.85845243 | 0.41547075 | 2.0662163  | NA         | NA         |
| 1700018B24f | 94.4726265 | 0.85817576 | 0.3717008  | 2.308781   | 0.02095574 | 0.12784726 |
| Pla2g4c     | 322.48999  | 0.85801354 | 0.34397656 | 2.49439541 | 0.01261719 | 0.09017    |
| Rilp        | 51.0850257 | 0.85776412 | 0.35698024 | 2.4028336  | 0.01626859 | 0.10742776 |
| Jam3        | 3302.98646 | 0.85763427 | 0.2478158  | 3.4607732  | 0.00053863 | 0.00917435 |
| Tph2        | 55.8347835 | 0.85732044 | 0.37492382 | 2.28665238 | 0.02221612 | 0.13211583 |
| Hist3h2ba   | 20.0163665 | 0.85697534 | 0.4256603  | 2.01328462 | 0.0440847  | 0.20288876 |
| Kif1a       | 236.621538 | 0.85616222 | 0.38512563 | 2.22307256 | 0.02621091 | 0.14641014 |
| Adra2b      | 147.951824 | 0.85605366 | 0.30367232 | 2.81900461 | 0.00481728 | 0.04566662 |
| Thrsp       | 314.758371 | 0.85487471 | 0.39948492 | 2.1399424  | 0.03235942 | 0.16757289 |
| Dtx3l       | 1350.00385 | 0.8542576  | 0.218249   | 3.91414205 | 9.07E-05   | 0.00226103 |
| Abca6       | 7.4357669  | 0.85392447 | 0.37551567 | 2.27400491 | NA         | NA         |
| Slc35d1     | 713.639324 | 0.85376206 | 0.24328457 | 3.50931444 | 0.00044926 | 0.00798457 |
| Ntm         | 20.0835775 | 0.85329881 | 0.43125769 | 1.97862862 | 0.04785783 | 0.21367706 |
| Slc26a8     | 18.9472675 | 0.85314978 | 0.43226943 | 1.97365284 | 0.04842123 | 0.21545419 |
| Irf7        | 11.1899704 | 0.85271908 | 0.43049886 | 1.98076967 | 0.04761711 | 0.21296913 |
| Ryr1        | 924.527713 | 0.85150276 | 0.21519144 | 3.95695458 | 7.59E-05   | 0.00196422 |
| Nt5e        | 132.287056 | 0.85066878 | 0.42430582 | 2.00484824 | 0.04497927 | 0.20548551 |
| Icam1       | 9852.59572 | 0.85034991 | 0.26688491 | 3.18620455 | 0.00144153 | 0.01906663 |
| Abhd5       | 1027.70526 | 0.84988597 | 0.1901837  | 4.46876352 | 7.87E-06   | 0.00030663 |
| Sema3f      | 236.090218 | 0.84980659 | 0.30977138 | 2.74333471 | 0.00608187 | 0.05426225 |
| AU021092    | 15.8330539 | 0.84932806 | 0.43227036 | 1.96480753 | 0.04943652 | 0.21809569 |
| Msx2        | 88.0112158 | 0.84847669 | 0.43069066 | 1.97003735 | 0.04883409 | 0.21621299 |
| Tram1l1     | 85.8647537 | 0.84807016 | 0.35898618 | 2.36240337 | 0.01815687 | 0.11599421 |
| Id3         | 508.883633 | 0.84804029 | 0.40376576 | 2.10032738 | 0.03570005 | 0.17902983 |
| Nudt11      | 451.317724 | 0.84801121 | 0.38696203 | 2.19145845 | 0.02841863 | 0.15447924 |
| Gfra4       | 158.680069 | 0.84798849 | 0.35168021 | 2.41124878 | 0.015898   | 0.10570239 |
| Scube1      | 54.1301781 | 0.84753774 | 0.38350578 | 2.20997383 | 0.02710698 | 0.14948249 |
| Crtac1      | 806.327359 | 0.84669077 | 0.34750671 | 2.43647317 | 0.01483127 | 0.10076063 |
| 1700034H15l | 27.1240372 | 0.84573171 | 0.41169548 | 2.05426523 | 0.03995003 | 0.19115781 |
| Zfp36       | 484.723861 | 0.84484448 | 0.2405076  | 3.51275586 | 0.00044348 | 0.00790898 |
| Cnppd1      | 735.659302 | 0.84469878 | 0.22195734 | 3.80568072 | 0.00014141 | 0.00327253 |
| Letmd1      | 855.23031  | 0.84433669 | 0.27305025 | 3.09223916 | 0.00198653 | 0.02430881 |
| Dmrta2      | 164.904108 | 0.84432856 | 0.30159708 | 2.79952498 | 0.00511779 | 0.04777112 |
| Gpr4        | 361.785877 | 0.84420003 | 0.25240893 | 3.34457275 | 0.00082409 | 0.01276443 |

|              |            |            |            |            |            |            |
|--------------|------------|------------|------------|------------|------------|------------|
| Ehox (Rhox4t | 9.11583124 | 0.84371184 | 0.41412539 | 2.03733426 | 0.04161656 | 0.19564059 |
| Pla2g1b      | 4347.94013 | 0.84331088 | 0.22283671 | 3.78443427 | 0.00015406 | 0.0034671  |
| Eme2         | 183.30636  | 0.84255254 | 0.23704381 | 3.55441702 | 0.00037882 | 0.00700476 |
| Cryba2       | 5.89243304 | 0.84234673 | 0.39603405 | 2.1269553  | 0.0334238  | NA         |
| Pcyox1l      | 1592.47395 | 0.84207609 | 0.22426106 | 3.75489218 | 0.00017342 | 0.00380903 |
| Myo5c        | 2789.80172 | 0.84183466 | 0.27549196 | 3.05575036 | 0.00224498 | 0.02657954 |
| Slc16a14     | 213.182087 | 0.84149216 | 0.30500385 | 2.75895585 | 0.00579864 | 0.05257994 |
| Tmc1         | 8.57888792 | 0.84109719 | 0.42991229 | 1.95643902 | 0.05041346 | 0.2207437  |
| Prdm9        | 191.082833 | 0.8407625  | 0.26633979 | 3.15672883 | 0.0015955  | 0.02048849 |
| Fam171b      | 162.587261 | 0.83998001 | 0.4100225  | 2.04861933 | 0.04049935 | 0.19271892 |
| Mir3072      | 23.8101532 | 0.83982819 | 0.42586942 | 1.97203213 | 0.04860594 | 0.21577978 |
| Cntn2        | 299.224119 | 0.83922152 | 0.34192945 | 2.45437042 | 0.01411315 | 0.0975005  |
| Rgs5         | 9.69811326 | 0.83883061 | 0.42719606 | 1.9635729  | 0.04957964 | 0.21860307 |
| Wdfy4        | 538.11703  | 0.83873995 | 0.40029054 | 2.0953279  | 0.03614185 | 0.18048875 |
| Myt1l        | 12.2225653 | 0.83840257 | 0.43031593 | 1.94834194 | 0.05137406 | 0.22303686 |
| Sh3kbp1      | 245.489627 | 0.8381015  | 0.39198585 | 2.1380912  | 0.03250934 | 0.16806941 |
| Gsn          | 526.021763 | 0.83685803 | 0.29187692 | 2.86716067 | 0.00414173 | 0.04073877 |
| Ank2         | 482.827837 | 0.83658234 | 0.38124063 | 2.19436826 | 0.02820895 | 0.15376001 |
| Tex101       | 47.6502868 | 0.835619   | 0.40598305 | 2.05826081 | 0.0395651  | 0.18991988 |
| Dock8        | 89.4139964 | 0.83517118 | 0.37886278 | 2.20441603 | 0.0274951  | 0.15103366 |
| Steap3       | 2293.21122 | 0.83508284 | 0.43226926 | 1.93185803 | 0.05337703 | 0.22892063 |
| Cybrd1       | 51.6657334 | 0.83446532 | 0.38500485 | 2.16741508 | 0.03020322 | 0.16008529 |
| Apobec2      | 1643.37915 | 0.83378886 | 0.30796127 | 2.7074472  | 0.00678029 | 0.05866229 |
| Ltc4s        | 23.8983347 | 0.83305779 | 0.40729719 | 2.04533156 | 0.04082218 | 0.19366252 |
| Smim24       | 31.0250009 | 0.83299949 | 0.41893711 | 1.98836406 | 0.04677144 | 0.2102359  |
| Shank2       | 27.2707433 | 0.83277916 | 0.42445938 | 1.9619761  | 0.04976527 | 0.21905936 |
| Gpx8         | 343.301985 | 0.83241929 | 0.25236188 | 3.2985144  | 0.00097198 | 0.01424622 |
| P4htm        | 665.516549 | 0.83223778 | 0.30773397 | 2.70440657 | 0.00684265 | 0.05905109 |
| Acacb        | 5176.04564 | 0.8319141  | 0.27467606 | 3.02870986 | 0.002456   | 0.0282618  |
| Gm973        | 145.578904 | 0.83131111 | 0.34821484 | 2.38735114 | 0.01697027 | 0.11032806 |
| Dnah10       | 446.262751 | 0.83111161 | 0.24338458 | 3.41480804 | 0.00063827 | 0.01053687 |
| Gja8         | 8.95385984 | 0.8308014  | 0.42762011 | 1.94284924 | 0.05203438 | 0.22506309 |
| Otud1        | 1139.27508 | 0.82913176 | 0.26488128 | 3.13020141 | 0.00174686 | 0.02197856 |
| Higd1b       | 9.01753929 | 0.82809264 | 0.42361918 | 1.95480438 | 0.05060616 | 0.22118506 |
| Chrne        | 34.048674  | 0.82774827 | 0.39294245 | 2.10653818 | 0.03515763 | 0.17728155 |
| P2rx5        | 450.059535 | 0.82745183 | 0.23591136 | 3.50746919 | 0.00045239 | 0.00803097 |
| Olfml3       | 77.0335679 | 0.82715805 | 0.42831722 | 1.93118096 | 0.05346068 | 0.22915298 |
| BC048502     | 4.68392966 | 0.8267026  | 0.37658052 | 2.19528774 | 0.02814296 | NA         |
| Calhm2       | 365.342961 | 0.82635559 | 0.27314589 | 3.02532683 | 0.00248365 | 0.02844122 |
| Extl2        | 672.948261 | 0.82615201 | 0.32409262 | 2.54912321 | 0.01079941 | 0.0813139  |
| Kcng2        | 9.38638284 | 0.8259939  | 0.4274261  | 1.93248352 | 0.05329985 | 0.22884208 |

|             |            |            |            |            |            |            |
|-------------|------------|------------|------------|------------|------------|------------|
| Kremen2     | 238.595284 | 0.82568656 | 0.32330916 | 2.55386066 | 0.01065359 | 0.08065918 |
| Tmem150a    | 1171.46578 | 0.82506178 | 0.20400092 | 4.0444022  | 5.25E-05   | 0.00144638 |
| Dynll2      | 11329.1959 | 0.82504613 | 0.16828605 | 4.90264134 | 9.46E-07   | 5.35E-05   |
| Marveld2    | 502.729617 | 0.8235016  | 0.21289508 | 3.86811005 | 0.00010968 | 0.00264035 |
| Flt3        | 6.0832764  | 0.82250783 | 0.40081371 | 2.05209502 | 0.04016043 | 0.1916927  |
| Kcna7       | 73.6472547 | 0.82179033 | 0.31973826 | 2.57019707 | 0.01016407 | 0.07848134 |
| Cd200r2     | 4.66605941 | 0.82153314 | 0.38923562 | 2.11063197 | 0.03480396 | NA         |
| Krt12       | 6.7049954  | 0.82153246 | 0.4145953  | 1.98152865 | 0.04753202 | 0.21277215 |
| Wdr45       | 2898.64918 | 0.82108798 | 0.24678573 | 3.32712904 | 0.00087746 | 0.01329955 |
| Fam149a     | 34.5637586 | 0.82100842 | 0.41946603 | 1.95727033 | 0.05031569 | 0.22060999 |
| 1300017J02R | 203.208356 | 0.82097806 | 0.39363118 | 2.08565303 | 0.03701006 | 0.1824805  |
| Ak4         | 34853.1751 | 0.82071838 | 0.27522262 | 2.98201644 | 0.00286357 | 0.03167305 |
| Prkd2       | 730.594906 | 0.82042205 | 0.2312674  | 3.54750414 | 0.0003889  | 0.00711503 |
| Bmyc        | 757.662764 | 0.82028655 | 0.21624204 | 3.79337226 | 0.00014862 | 0.0033987  |
| Gm10439     | 27.9932963 | 0.82012657 | 0.42040027 | 1.95082315 | 0.05107809 | 0.2224908  |
| Myc         | 223.161692 | 0.81933128 | 0.42389313 | 1.93287228 | 0.05325193 | 0.22884208 |
| Cpsf4l      | 1481.94836 | 0.81931138 | 0.28094472 | 2.91627256 | 0.00354241 | 0.03677437 |
| Ncmap       | 200.014003 | 0.81814851 | 0.30083035 | 2.7196342  | 0.00653542 | 0.05712887 |
| Lrrn4       | 482.034557 | 0.81710279 | 0.38624162 | 2.11552237 | 0.03438545 | 0.17417855 |
| Cish        | 184.189198 | 0.81619973 | 0.34317855 | 2.37835301 | 0.01739017 | 0.11244678 |
| Ncf2        | 967.740298 | 0.81580002 | 0.22050415 | 3.69970372 | 0.00021585 | 0.00452386 |
| Bex2        | 3074.01741 | 0.81479439 | 0.1562285  | 5.21540175 | 1.83E-07   | 1.30E-05   |
| Caps2       | 136.376509 | 0.8147921  | 0.43088182 | 1.89098739 | 0.05862603 | 0.24234273 |
| Ggt5        | 44.8122135 | 0.81434004 | 0.37129072 | 2.19326795 | 0.02828808 | 0.15413732 |
| Bdnf        | 87.3664358 | 0.81412993 | 0.3508206  | 2.32064463 | 0.02030603 | 0.12525197 |
| Amigo3      | 50.8426839 | 0.81379208 | 0.3889913  | 2.09205725 | 0.03643339 | 0.18101461 |
| Chl1        | 6.06974771 | 0.81304288 | 0.40175372 | 2.02373456 | 0.04299747 | 0.19994243 |
| Exoc3l      | 515.207125 | 0.81269575 | 0.26534017 | 3.06284476 | 0.00219244 | 0.02614616 |
| Akr1c21     | 5.23560899 | 0.81241479 | 0.37520281 | 2.1652684  | 0.03036714 | NA         |
| Rsph3a      | 33.9814491 | 0.81206649 | 0.42203265 | 1.92417927 | 0.05433212 | 0.23090918 |
| Npffr1      | 9.516712   | 0.81159702 | 0.43022059 | 1.88646718 | 0.05923203 | 0.24413488 |
| Cldn18      | 9.48394511 | 0.81157523 | 0.41995392 | 1.93253401 | 0.05329363 | 0.22884208 |
| Fermt1      | 20.3177131 | 0.81090736 | 0.42728635 | 1.8978078  | 0.05772141 | 0.23955847 |
| Samd15      | 37.1168814 | 0.81087039 | 0.37786198 | 2.14594329 | 0.0318775  | 0.16620246 |
| Fam228a     | 18.7148995 | 0.81062551 | 0.4317888  | 1.87736576 | 0.06046798 | 0.24739215 |
| Ssc5d       | 121.993509 | 0.81034674 | 0.27023023 | 2.99872721 | 0.0027111  | 0.03035868 |
| Nxn1l       | 36.7956448 | 0.80984527 | 0.39710534 | 2.03937139 | 0.04141298 | 0.19532548 |
| Sult5a1     | 154.970589 | 0.80938164 | 0.3635783  | 2.226155   | 0.0260038  | 0.14604013 |
| Homez       | 923.853259 | 0.80911184 | 0.31758706 | 2.54768518 | 0.01084403 | 0.08140944 |
| Gucy2c      | 19.0022407 | 0.80882098 | 0.42567565 | 1.90008748 | 0.05742164 | 0.23881336 |
| Mpp4        | 10.0796947 | 0.80873731 | 0.42706244 | 1.89372149 | 0.05826199 | 0.24122262 |



|             |            |            |            |            |            |            |
|-------------|------------|------------|------------|------------|------------|------------|
| Gadd45a     | 862.506918 | 0.80872676 | 0.22973636 | 3.5202384  | 0.00043116 | 0.00776036 |
| Sh3pxd2b    | 481.671206 | 0.80834862 | 0.34122697 | 2.36894706 | 0.01783881 | 0.11449083 |
| Pla2g4f     | 436.37245  | 0.80819304 | 0.30779281 | 2.62576973 | 0.00864533 | 0.07005914 |
| Oaf         | 325.797374 | 0.80765447 | 0.27621739 | 2.92398127 | 0.00345586 | 0.03613847 |
| Moxd1       | 23.3142865 | 0.80742521 | 0.41860419 | 1.92885122 | 0.05374933 | 0.22988336 |
| Lpar6       | 1344.17123 | 0.80733246 | 0.33705257 | 2.39527162 | 0.01660806 | 0.10897548 |
| Pik3ip1     | 616.69024  | 0.80716669 | 0.3424811  | 2.35682115 | 0.01843212 | 0.11699507 |
| Spag4       | 102.128249 | 0.80627494 | 0.34790354 | 2.31752439 | 0.02047518 | 0.12575418 |
| Csf2ra      | 599.848315 | 0.80615686 | 0.21869657 | 3.68618879 | 0.00022764 | 0.00470743 |
| Slc16a2     | 5.84841059 | 0.80604161 | 0.39381573 | 2.04674813 | 0.04068282 | NA         |
| Slc30a10    | 303.818704 | 0.80564533 | 0.27618097 | 2.91709216 | 0.00353311 | 0.03670237 |
| Spata1      | 163.779545 | 0.80394518 | 0.32183123 | 2.49803349 | 0.01248844 | 0.08957921 |
| Gdf11       | 93.021585  | 0.80384761 | 0.33291899 | 2.41454418 | 0.01575491 | 0.1051071  |
| Nagk        | 1383.05796 | 0.80381557 | 0.20801236 | 3.86426831 | 0.00011142 | 0.00266985 |
| Krt79       | 7.74782215 | 0.80365533 | 0.40470387 | 1.98578611 | 0.04705708 | 0.21114854 |
| Prrt4       | 287.154048 | 0.8026765  | 0.30214809 | 2.6565665  | 0.00789409 | 0.0657883  |
| Gpr63       | 57.385336  | 0.80202212 | 0.38403406 | 2.08841402 | 0.0367605  | 0.18211615 |
| Chil1       | 110.079307 | 0.80178439 | 0.37824056 | 2.11977371 | 0.03402513 | 0.17308631 |
| St8sia4     | 29.1860541 | 0.80152488 | 0.40896041 | 1.95990823 | 0.05000652 | 0.21967552 |
| Vsx2        | 13.4651947 | 0.80120209 | 0.43139553 | 1.85723318 | 0.06327799 | 0.25427286 |
| Hoxa9       | 92.4084357 | 0.80069268 | 0.43194312 | 1.85369937 | 0.06378218 | 0.25550662 |
| Lactb       | 838.950175 | 0.80022664 | 0.26851503 | 2.98019307 | 0.00288067 | 0.03183885 |
| P2rx3       | 224.726887 | 0.80014499 | 0.28104845 | 2.84700022 | 0.00441333 | 0.04273459 |
| Gm4858      | 19.6637128 | 0.79980135 | 0.40532677 | 1.97322607 | NA         | NA         |
| C920025E04F | 12.4387647 | 0.79954846 | 0.43225916 | 1.84969696 | 0.06435724 | 0.25681792 |
| Rhov        | 499.94848  | 0.7994101  | 0.21475281 | 3.72246637 | 0.00019729 | 0.00424343 |
| Tescl       | 27.3244872 | 0.7987583  | 0.41986809 | 1.90240294 | 0.0571185  | 0.23832835 |
| Smco3       | 11.7297851 | 0.79762614 | 0.432125   | 1.84582272 | 0.06491795 | 0.25812811 |
| Glb1l       | 524.843136 | 0.79740927 | 0.20517263 | 3.88652855 | 0.00010169 | 0.0024704  |
| Samd4       | 24.8680898 | 0.79687668 | 0.42496287 | 1.87516778 | 0.06076965 | 0.24810416 |
| Mypop       | 356.285889 | 0.79678661 | 0.26175329 | 3.0440366  | 0.00233427 | 0.02731391 |
| Mbp         | 634.409119 | 0.79661772 | 0.22889348 | 3.48029885 | 0.00050085 | 0.00866384 |
| Filip1l     | 59.6191327 | 0.79605885 | 0.38878346 | 2.04756358 | 0.04060278 | 0.19303026 |
| Gal3st4     | 28.4214035 | 0.79590755 | 0.43223394 | 1.84138142 | 0.06556568 | 0.25939598 |
| Rtp4        | 11.1260417 | 0.79561416 | 0.43119802 | 1.84512481 | 0.06501939 | 0.25826729 |
| Adamtsl3    | 7.55148208 | 0.79479975 | 0.42278507 | 1.87991441 | 0.06011974 | 0.24660502 |
| Zhx3        | 73.4527259 | 0.7937062  | 0.34386404 | 2.30819772 | 0.02098814 | 0.12799474 |
| 5330426P16F | 45.6309695 | 0.79253492 | 0.3810154  | 2.08006011 | 0.03752002 | 0.18394509 |
| Gabarapl2   | 6973.65383 | 0.79215937 | 0.27590404 | 2.87114091 | 0.00408993 | 0.04042058 |
| Fam161b     | 398.799645 | 0.79201661 | 0.30745987 | 2.57599992 | 0.00999507 | 0.07748419 |
| Zswim7      | 1445.07963 | 0.7919042  | 0.23617309 | 3.35306708 | 0.00079921 | 0.01247848 |

|             |            |            |            |            |            |            |
|-------------|------------|------------|------------|------------|------------|------------|
| Sh3bp1      | 5654.1673  | 0.79177736 | 0.18846843 | 4.20111401 | 2.66E-05   | 0.00083952 |
| Parvb       | 3322.78048 | 0.79167491 | 0.2210579  | 3.58130104 | 0.00034189 | 0.00650758 |
| Tlr5        | 9.14504111 | 0.79159423 | 0.39223926 | 2.01814125 | NA         | NA         |
| P4ha3       | 11.0392891 | 0.7912438  | 0.42649424 | 1.85522738 | 0.06356376 | 0.25483194 |
| Pcdhga10    | 79.4655122 | 0.79064645 | 0.37606117 | 2.10244109 | 0.03551466 | 0.17852406 |
| Slc39a2     | 47.4398571 | 0.78957317 | 0.39578706 | 1.99494437 | 0.04604895 | 0.20853442 |
| 4930432K21F | 379.763414 | 0.78909034 | 0.31325809 | 2.51897837 | 0.01176959 | 0.08613123 |
| Rab32       | 45.7003675 | 0.78908184 | 0.37210506 | 2.12058884 | 0.03395642 | 0.17290644 |
| Galnt3      | 66.7561023 | 0.78889417 | 0.42832146 | 1.84182733 | 0.06550041 | 0.25931693 |
| Skint8      | 31.4881145 | 0.78882953 | 0.42956175 | 1.83635888 | 0.0663046  | 0.2610228  |
| Ap5z1       | 1469.21161 | 0.78879026 | 0.18285855 | 4.31366359 | 1.61E-05   | 0.0005514  |
| Tfap2c      | 5072.41486 | 0.78878158 | 0.19638839 | 4.01643692 | 5.91E-05   | 0.00157874 |
| Plekhd1os   | 8.7702939  | 0.7885301  | 0.42257287 | 1.86602157 | 0.06203835 | 0.25096937 |
| B430319G15I | 10.4701192 | 0.78832263 | 0.42624548 | 1.84945687 | 0.06439187 | 0.25685896 |
| Fam25c      | 5348.04078 | 0.78786334 | 0.31928456 | 2.46758988 | 0.01360261 | 0.09511427 |
| Icam2       | 63.7192663 | 0.78764323 | 0.38113655 | 2.06656443 | 0.03877522 | 0.18825893 |
| Mfsd11      | 1252.35684 | 0.78716917 | 0.19707955 | 3.99416967 | 6.49E-05   | 0.00172285 |
| Bmper       | 8.94353234 | 0.78665903 | 0.42936279 | 1.83215462 | 0.06692839 | 0.26278979 |
| Mafa        | 219.391512 | 0.78659436 | 0.40931628 | 1.92172753 | 0.05464005 | 0.23178183 |
| Efs         | 3014.49764 | 0.78638733 | 0.36009344 | 2.18384245 | 0.02897383 | 0.15607012 |
| Cd3g        | 2458.68611 | 0.78632955 | 0.42320501 | 1.85803461 | 0.0631641  | 0.25397417 |
| 4930486L24F | 112.200203 | 0.78619137 | 0.36052147 | 2.18070609 | 0.02920516 | 0.15671825 |
| Adck3       | 790.593965 | 0.78614954 | 0.19560773 | 4.01901051 | 5.84E-05   | 0.00156678 |
| Hoxb4       | 97.1149499 | 0.78614155 | 0.36281673 | 2.16677312 | 0.03025216 | 0.16029005 |
| Dpcr1       | 133.174301 | 0.78532318 | 0.39080744 | 2.00948882 | 0.04448532 | 0.20400802 |
| Saa4        | 81.112015  | 0.7853182  | 0.37547873 | 2.09151185 | 0.03648221 | 0.18114137 |
| Ddit3       | 1737.97424 | 0.78476034 | 0.32559431 | 2.41023971 | 0.01594204 | 0.10575075 |
| Tcirg1      | 2006.08541 | 0.78469133 | 0.250765   | 3.12918994 | 0.00175289 | 0.02203653 |
| Slc6a17     | 15.909188  | 0.78437904 | 0.43210522 | 1.8152501  | 0.06948548 | 0.26821738 |
| Prdm12      | 5.41966804 | 0.78429114 | 0.40302287 | 1.94602145 | 0.05165216 | NA         |
| Faxc        | 159.168031 | 0.78393898 | 0.34938729 | 2.24375356 | 0.02484826 | 0.14201225 |
| Pcnxl2      | 39.2681184 | 0.78382283 | 0.39880464 | 1.96543057 | 0.04936442 | 0.21783943 |
| Esam        | 17.5032327 | 0.7835537  | 0.43022946 | 1.82124603 | 0.06856947 | 0.26629597 |
| Nr2f1       | 74.4422714 | 0.78243184 | 0.40143344 | 1.94909482 | 0.0512841  | 0.22283815 |
| Rph3a       | 17.4494656 | 0.78210366 | 0.42731892 | 1.83025752 | 0.06721144 | 0.2633085  |
| Gmip        | 414.560319 | 0.78191819 | 0.24020572 | 3.25520218 | 0.00113312 | 0.01605251 |
| Egfl6       | 883.074808 | 0.78102968 | 0.33945556 | 2.30083044 | 0.02140122 | 0.12925061 |
| Twist1      | 99.2467893 | 0.78058118 | 0.38513276 | 2.02678466 | 0.04268444 | 0.19915563 |
| Adam4       | 16.8852587 | 0.78040947 | 0.42636838 | 1.83036434 | 0.06719548 | 0.2633085  |
| Arsb        | 330.027085 | 0.78024284 | 0.4076273  | 1.91410839 | 0.05560631 | 0.23467483 |
| Al314180    | 5270.58758 | 0.77993361 | 0.22303309 | 3.49694125 | 0.00047063 | 0.00827907 |

|             |            |            |            |            |            |            |
|-------------|------------|------------|------------|------------|------------|------------|
| Pip5kl1     | 128.874058 | 0.77980439 | 0.33163513 | 2.3513926  | 0.01870329 | 0.11804173 |
| Ngb         | 16.7596299 | 0.77969125 | 0.42665124 | 1.82746744 | 0.06762952 | 0.26401773 |
| Lbx1        | 11.5991324 | 0.77964285 | 0.42993334 | 1.81340403 | 0.06976953 | 0.26889366 |
| Gm4890      | 20.3973597 | 0.77958571 | 0.43108481 | 1.8084277  | 0.07053996 | 0.27025546 |
| Myom3       | 630.608891 | 0.77958383 | 0.21471504 | 3.63078352 | 0.00028256 | 0.00556218 |
| Hoxd13      | 246.220521 | 0.77908635 | 0.36641724 | 2.12622735 | 0.03348433 | 0.17123146 |
| Tapbp       | 2945.9755  | 0.7771911  | 0.23218181 | 3.34733836 | 0.00081592 | 0.01267563 |
| Isl1        | 119.756468 | 0.77675783 | 0.34725959 | 2.23682184 | 0.02529799 | 0.14352754 |
| Atf5        | 2509.09447 | 0.77667537 | 0.22116985 | 3.51166921 | 0.0004453  | 0.00793229 |
| Ttll3       | 759.864959 | 0.77653128 | 0.28026111 | 2.77074219 | 0.00559287 | 0.05125204 |
| Tmem79      | 617.544886 | 0.77638512 | 0.22409684 | 3.46450719 | 0.0005312  | 0.00910778 |
| Prkce       | 287.140199 | 0.77634809 | 0.28023609 | 2.77033585 | 0.00559985 | 0.0512858  |
| Snhg9       | 45.5421498 | 0.77524    | 0.38432455 | 2.01714931 | 0.04367993 | 0.2017424  |
| Gm13889     | 145.235612 | 0.77506612 | 0.36448162 | 2.12648887 | 0.03346257 | 0.17123146 |
| Clic6       | 91.5276349 | 0.77468737 | 0.38959456 | 1.98844507 | 0.04676249 | 0.2102359  |
| Cdx1        | 2906.01913 | 0.7746025  | 0.42959631 | 1.80309391 | 0.07137347 | 0.27224155 |
| Tnc         | 23.6576441 | 0.7744732  | 0.39283594 | 1.97149273 | NA         | NA         |
| 2810433D01I | 8.5519655  | 0.77440961 | 0.42172911 | 1.83627262 | 0.06631735 | 0.2610228  |
| Inha        | 31.6792479 | 0.77418888 | 0.43124733 | 1.79523171 | 0.07261679 | 0.27469319 |
| Abo         | 47.3036255 | 0.77362837 | 0.3855105  | 2.00676344 | 0.04477486 | 0.20497316 |
| Acox1       | 3053.18606 | 0.77330181 | 0.17547514 | 4.40690228 | 1.05E-05   | 0.00038918 |
| D430020J02F | 940.887935 | 0.77326744 | 0.20444806 | 3.78221953 | 0.00015544 | 0.00348298 |
| Pxdc1       | 23.793962  | 0.77293023 | 0.43227229 | 1.78806333 | 0.07376579 | 0.2772625  |
| Sdcbp2      | 175.180555 | 0.7724947  | 0.29377539 | 2.62954194 | 0.00855    | 0.06954029 |
| Crym        | 58.0412026 | 0.77225548 | 0.3434559  | 2.24848512 | 0.02454527 | 0.14102928 |
| Dusp22      | 223.55301  | 0.77176607 | 0.30796151 | 2.50604714 | 0.01220893 | 0.08830751 |
| Popdc2      | 15.2981413 | 0.77175556 | 0.42587705 | 1.81215579 | 0.06996213 | 0.26937713 |
| Cdk5r2      | 227.93462  | 0.77068737 | 0.34504447 | 2.23358853 | 0.02551016 | 0.14431011 |
| Aph1b       | 169.250729 | 0.76997506 | 0.30088366 | 2.55904579 | 0.01049599 | 0.07998991 |
| Col6a3      | 35.2582933 | 0.76986752 | 0.42256146 | 1.82190663 | NA         | NA         |
| Stxbp5l     | 75.7462395 | 0.76982963 | 0.43008997 | 1.78992696 | 0.07346565 | 0.27689394 |
| Irak1bp1    | 868.277914 | 0.76969308 | 0.28701117 | 2.68175301 | 0.00732375 | 0.06199872 |
| Cntnap3     | 11.4875785 | 0.76923349 | 0.42881272 | 1.7938682  | 0.07283421 | 0.27518095 |
| Aqp9        | 199.612332 | 0.76871684 | 0.39662077 | 1.93816591 | 0.05260298 | 0.22676332 |
| Gm15401     | 6.2767321  | 0.76846613 | 0.40366601 | 1.90371771 | 0.05694696 | 0.2379318  |
| 4933416C03F | 37.41122   | 0.76826802 | 0.43210044 | 1.77798481 | 0.07540635 | 0.28085917 |
| B4galt4     | 584.223772 | 0.76816785 | 0.24463572 | 3.14004777 | 0.0016892  | 0.02133939 |
| Xylb        | 1508.98962 | 0.76738429 | 0.18190486 | 4.21860255 | 2.46E-05   | 0.00078496 |
| Pcdhgc4     | 14.155194  | 0.766916   | 0.43007654 | 1.78320819 | 0.07455242 | 0.27913565 |
| Pabpc1l     | 11.4884897 | 0.76674416 | 0.43217392 | 1.77415645 | 0.07603727 | 0.28254616 |
| Matn4       | 21.7544027 | 0.7664798  | 0.42609465 | 1.79884867 | 0.07204262 | 0.27371972 |

|             |            |            |            |            |            |            |
|-------------|------------|------------|------------|------------|------------|------------|
| Serinc4     | 15.9465581 | 0.766294   | 0.42857812 | 1.78799142 | 0.07377739 | 0.2772625  |
| Hoxa5       | 55.6357214 | 0.76582398 | 0.43226609 | 1.77164945 | 0.07645277 | 0.28361568 |
| Gm13580     | 1062.88979 | 0.76575548 | 0.20471144 | 3.74065803 | 0.00018354 | 0.00400873 |
| Aoc1        | 9.20020023 | 0.76560531 | 0.40919943 | 1.87098333 | 0.06134739 | 0.24948046 |
| Gng3        | 661.141742 | 0.76554871 | 0.29095789 | 2.63113235 | 0.00851009 | 0.06928816 |
| Ccr4        | 85.3704919 | 0.76553149 | 0.34458376 | 2.22161218 | 0.02630953 | 0.14666206 |
| 1110054M08  | 50.3846046 | 0.76542382 | 0.37654304 | 2.0327658  | 0.04207619 | 0.19720519 |
| Tspan2os    | 50.8681391 | 0.76519555 | 0.41820612 | 1.82970913 | 0.06729345 | 0.26331573 |
| 2610035D17I | 326.03034  | 0.7649677  | 0.30344488 | 2.52094445 | 0.01170403 | 0.0858535  |
| Gm6981      | 40.0320119 | 0.76382636 | 0.36188592 | 2.11068271 | 0.03479959 | 0.17581822 |
| Nr2c1       | 771.203406 | 0.76367682 | 0.26009173 | 2.93618267 | 0.00332279 | 0.03512756 |
| Plekho1     | 163.984321 | 0.76366197 | 0.34746785 | 2.19779176 | 0.02796395 | 0.15285321 |
| lspd        | 187.742564 | 0.76280515 | 0.33220681 | 2.29617554 | 0.02166585 | 0.13018763 |
| Fhl2        | 33.4866953 | 0.76270195 | 0.41504719 | 1.83762709 | 0.06611737 | 0.26043346 |
| Greb1       | 355.942601 | 0.76249337 | 0.42445946 | 1.79638679 | 0.07243302 | 0.27446539 |
| Sfrp5       | 145.632696 | 0.76239336 | 0.41208094 | 1.85010587 | 0.06429829 | 0.25672394 |
| Pdcd4       | 3914.14667 | 0.76206232 | 0.2352217  | 3.23976203 | 0.00119629 | 0.01669981 |
| Nudt10      | 120.532939 | 0.76166439 | 0.41127544 | 1.85195692 | 0.06403201 | 0.25617746 |
| Nap1l2      | 221.487297 | 0.76141298 | 0.31039947 | 2.45300991 | 0.01416664 | 0.09773979 |
| Gm1995      | 25.9840829 | 0.76077035 | 0.41094525 | 1.85126934 | 0.06413081 | 0.2564266  |
| Car2        | 1875.17424 | 0.76032648 | 0.17249287 | 4.40787204 | 1.04E-05   | 0.00038837 |
| 1110032F04F | 284.256228 | 0.75997226 | 0.30630018 | 2.48113554 | 0.01309646 | 0.09249001 |
| Plekhm2     | 1231.11832 | 0.75985889 | 0.18187887 | 4.17782939 | 2.94E-05   | 0.00091352 |
| Cd8a        | 5.30476929 | 0.75945035 | 0.38910765 | 1.95177441 | 0.05096499 | NA         |
| Gm20300     | 388.887387 | 0.7581714  | 0.3301003  | 2.29679097 | 0.0216307  | 0.13008842 |
| Ttc8        | 429.786081 | 0.75747009 | 0.31101884 | 2.43544764 | 0.01487338 | 0.10100257 |
| Eva1c       | 110.822745 | 0.7569556  | 0.39235803 | 1.92924712 | 0.05370019 | 0.22973636 |
| Rhox4c      | 5.69275171 | 0.75664398 | 0.39816636 | 1.90032123 | 0.05739098 | NA         |
| Heph        | 76.343473  | 0.7563095  | 0.4301238  | 1.75835309 | 0.07868745 | 0.28907832 |
| Celf6       | 13.9098953 | 0.75624022 | 0.43086442 | 1.75516978 | 0.07923027 | 0.29038651 |
| Fam163a     | 13.9791397 | 0.75444866 | 0.43224149 | 1.74543323 | 0.08090949 | 0.29397743 |
| Pced1b      | 3497.61446 | 0.75439738 | 0.20223919 | 3.73022357 | 0.00019131 | 0.00414932 |
| Laptm5      | 7627.60934 | 0.75424937 | 0.25442031 | 2.96458003 | 0.00303096 | 0.03302127 |
| F11r        | 4815.21289 | 0.75403641 | 0.24257517 | 3.10846494 | 0.00188062 | 0.02337771 |
| 6330418K02F | 62.896023  | 0.75399771 | 0.3557829  | 2.11926349 | 0.0340682  | 0.17319211 |
| Havcr2      | 22.5292172 | 0.7532017  | 0.43209404 | 1.74314299 | 0.08130864 | 0.29469694 |
| Lca5l       | 11.9934559 | 0.75279654 | 0.43025309 | 1.74965979 | 0.08017704 | 0.29199838 |
| Whamm       | 3184.96854 | 0.75253478 | 0.20203982 | 3.72468535 | 0.00019556 | 0.0042121  |
| Cmc1        | 1209.7703  | 0.75247851 | 0.25632173 | 2.93567974 | 0.00332818 | 0.03515376 |
| Psap        | 29582.8658 | 0.75228538 | 0.17357715 | 4.33401158 | 1.46E-05   | 0.00051282 |
| Evpl        | 197.838357 | 0.75211154 | 0.2736319  | 2.74862521 | 0.00598458 | 0.05359457 |

|             |            |            |            |            |            |            |
|-------------|------------|------------|------------|------------|------------|------------|
| Chka        | 5782.69059 | 0.7520256  | 0.18548724 | 4.05432522 | 5.03E-05   | 0.00139873 |
| Rhox4e      | 6.04393892 | 0.75188382 | 0.40228732 | 1.86902193 | 0.06161976 | 0.24999972 |
| Abca16      | 19.2236701 | 0.75113507 | 0.42484796 | 1.76800913 | 0.07705938 | 0.28511786 |
| Slc38a6     | 597.077862 | 0.75085118 | 0.20265669 | 3.70504018 | 0.00021136 | 0.004466   |
| Svep1       | 7.30903471 | 0.74973812 | 0.36004284 | 2.08235809 | NA         | NA         |
| Jun         | 360.544305 | 0.74971192 | 0.35174281 | 2.13142074 | 0.0330545  | 0.16974956 |
| Spz1        | 6.14962252 | 0.74946404 | 0.40117548 | 1.8681701  | 0.06173836 | 0.25019074 |
| Alcam       | 43.6823094 | 0.74939667 | 0.40620633 | 1.84486701 | 0.06505689 | 0.25835026 |
| Mat1a       | 7.99192821 | 0.74934598 | 0.41212496 | 1.81824943 | 0.06902602 | 0.26716458 |
| Hspa12b     | 22.324928  | 0.74925565 | 0.42433101 | 1.76573391 | 0.0774405  | 0.28570816 |
| Ltb4r1      | 42.6553738 | 0.74924313 | 0.39339567 | 1.9045536  | 0.05683812 | 0.23756811 |
| Kcnip3      | 454.654428 | 0.74908342 | 0.37425507 | 2.00153175 | 0.04533512 | 0.20662555 |
| Gtsf1       | 520.45389  | 0.74901563 | 0.30855127 | 2.42752407 | 0.01520228 | 0.10256424 |
| Amigo2      | 47.4531906 | 0.74855317 | 0.39499093 | 1.89511482 | 0.05807719 | 0.24090648 |
| Exoc3l4     | 22.0767098 | 0.74798251 | 0.4202925  | 1.77967132 | 0.07512977 | 0.28037989 |
| Gm166       | 380.445828 | 0.74755888 | 0.27113481 | 2.75714827 | 0.00583079 | 0.05265658 |
| A930011O12  | 153.235412 | 0.74707992 | 0.36906873 | 2.0242298  | 0.04294651 | 0.19986389 |
| Id2         | 606.753063 | 0.74695435 | 0.30454707 | 2.45267293 | 0.01417992 | 0.09774466 |
| Mmp9        | 56.7551366 | 0.74679439 | 0.37052007 | 2.01553019 | 0.04384913 | 0.20213471 |
| Map7d2      | 1955.1853  | 0.7467128  | 0.29653448 | 2.51813144 | 0.01179793 | 0.08629802 |
| C430049B03f | 35.8622945 | 0.74671053 | 0.37136783 | 2.01070333 | 0.0443568  | 0.20365888 |
| Xlr4c       | 357.903861 | 0.74660532 | 0.35756904 | 2.08800327 | 0.03679754 | 0.18218355 |
| Bsnd        | 13.0391413 | 0.74651298 | 0.42804904 | 1.74398938 | 0.08116094 | 0.29446925 |
| Dcdc2b      | 20.3315456 | 0.74624733 | 0.42778087 | 1.74446165 | 0.08107862 | 0.29438564 |
| Nr1h3       | 44.4143152 | 0.74614911 | 0.38146141 | 1.95602779 | 0.05046188 | 0.22086482 |
| Zfp503      | 37.3940867 | 0.74593606 | 0.42583138 | 1.75171698 | 0.07982249 | 0.29155449 |
| Ccdc78      | 12.4120119 | 0.74570724 | 0.43223731 | 1.72522647 | 0.08448667 | 0.30143234 |
| Zpbp        | 35.3305131 | 0.74534621 | 0.41347475 | 1.80264023 | 0.07144473 | 0.27231301 |
| 2500004C02f | 217.420551 | 0.74464059 | 0.34304003 | 2.1707105  | 0.02995306 | 0.15925205 |
| Bcam        | 10457.538  | 0.74405811 | 0.24311456 | 3.06052463 | 0.0022095  | 0.02628911 |
| Trpd5l3     | 16.3753786 | 0.74390976 | 0.43225494 | 1.72099772 | 0.08525124 | 0.30288828 |
| B3galt4     | 191.324273 | 0.74362205 | 0.25533452 | 2.91234438 | 0.00358727 | 0.03706686 |
| Creb3       | 1060.48493 | 0.74318506 | 0.23835762 | 3.11794129 | 0.00182119 | 0.02278466 |
| Ccnd2       | 139.275118 | 0.74268512 | 0.39081879 | 1.90033114 | 0.05738968 | 0.23881336 |
| Ebf3        | 14.3837834 | 0.74242898 | 0.43045119 | 1.72476926 | 0.08456906 | 0.30156696 |
| Col4a5      | 38.9053465 | 0.74213535 | 0.43153586 | 1.71975362 | 0.08547724 | 0.30334471 |
| Izumo4      | 214.555127 | 0.74144917 | 0.29061742 | 2.55128949 | 0.01073251 | 0.08098075 |
| Postn       | 17.290362  | 0.74118841 | 0.36490229 | 2.03119696 | NA         | NA         |
| Gpr176      | 5.99817645 | 0.74111617 | 0.35195764 | 2.10569707 | 0.03523067 | 0.17747724 |
| Cygb        | 35.6498541 | 0.7410148  | 0.41101411 | 1.80289382 | 0.07140489 | 0.27229463 |
| Rin1        | 344.041688 | 0.74099488 | 0.23979291 | 3.09014512 | 0.00200059 | 0.02445369 |

|             |            |            |            |            |            |            |
|-------------|------------|------------|------------|------------|------------|------------|
| Atp2a1      | 15.9555951 | 0.74093379 | 0.43221527 | 1.71427027 | 0.0864791  | 0.30564466 |
| Fbxl20      | 3535.99601 | 0.74048175 | 0.22052648 | 3.35779066 | 0.00078568 | 0.01232379 |
| Pogk        | 41.1165403 | 0.74004525 | 0.42154921 | 1.75553703 | 0.07916749 | 0.29029325 |
| Cabp4       | 67.5888111 | 0.73990757 | 0.38806859 | 1.90664121 | 0.05656706 | 0.23698126 |
| Klhl10      | 231.023035 | 0.73968375 | 0.25723285 | 2.87554158 | 0.00403335 | 0.04005276 |
| 6430548M08  | 46.3369889 | 0.7390954  | 0.41714779 | 1.77178309 | 0.07643057 | 0.283601   |
| Pyurf       | 724.858547 | 0.7387328  | 0.26115635 | 2.82869938 | 0.00467376 | 0.04475468 |
| Mylk        | 64.8484872 | 0.73870268 | 0.40990715 | 1.80212199 | 0.07152621 | 0.27249    |
| Tmprss11f   | 154.522105 | 0.73847019 | 0.37511632 | 1.9686432  | 0.04899408 | 0.21669707 |
| 1700067K01F | 100.430173 | 0.73842586 | 0.35398048 | 2.08606381 | 0.03697284 | 0.18247163 |
| Dapk1       | 2389.53538 | 0.7377798  | 0.27449252 | 2.68779561 | 0.00719254 | 0.06118775 |
| Anxa1       | 728.009158 | 0.73764026 | 0.28253843 | 2.61076079 | 0.00903411 | 0.07211981 |
| Ccdc19      | 132.572602 | 0.73683676 | 0.37039992 | 1.98930054 | 0.04666804 | 0.20999268 |
| Slc46a1     | 764.749133 | 0.73673083 | 0.20111687 | 3.66319762 | 0.00024909 | 0.00505025 |
| Lrp1b       | 9.63159087 | 0.73664489 | 0.42532449 | 1.73195976 | 0.08328073 | 0.29895739 |
| Snai1       | 105.224006 | 0.73658083 | 0.33247393 | 2.21545439 | 0.02672889 | 0.14813293 |
| Efcab1      | 75.7946942 | 0.73503589 | 0.33535385 | 2.19182179 | 0.02839238 | 0.15443507 |
| D930020B18I | 17.8082915 | 0.73474507 | 0.42867289 | 1.71399938 | 0.08652884 | 0.30575096 |
| Rasgef1c    | 61.788717  | 0.73441623 | 0.34186438 | 2.14826779 | 0.03169249 | 0.16560816 |
| Cdkl1       | 8.22149434 | 0.73407792 | 0.4116764  | 1.78314306 | 0.07456302 | 0.27913565 |
| Fndc7       | 37.8557119 | 0.73377079 | 0.42237746 | 1.73723944 | 0.08234492 | 0.29691219 |
| Nudt17      | 678.593266 | 0.73351904 | 0.25520718 | 2.87421002 | 0.0040504  | 0.0401463  |
| 2700046G09I | 67.9490952 | 0.73341316 | 0.37639886 | 1.94849994 | 0.05135517 | 0.22301711 |
| Mrgprd      | 8.89087064 | 0.73340856 | 0.40317994 | 1.81906013 | 0.06890226 | 0.26700698 |
| Scube3      | 1397.20833 | 0.73328995 | 0.29638759 | 2.47409127 | 0.01335756 | 0.0937803  |
| Dnase1l2    | 42.2655012 | 0.73292285 | 0.37189581 | 1.97077471 | 0.04874965 | 0.21604611 |
| Hip1        | 7775.25494 | 0.73242519 | 0.2307861  | 3.17361047 | 0.00150556 | 0.0196417  |
| Steap4      | 8.48181921 | 0.73242188 | 0.34972463 | 2.09428168 | NA         | NA         |
| 2310061J03R | 83.0329867 | 0.73150627 | 0.32826666 | 2.22839037 | 0.02585449 | 0.14538871 |
| Hoxa2       | 14.6644122 | 0.73109296 | 0.40705642 | 1.79604822 | 0.07248685 | 0.27453555 |
| Morc4       | 455.502899 | 0.73024126 | 0.35897515 | 2.03423903 | 0.0419275  | 0.1967455  |
| Prr18       | 37.7528565 | 0.73021101 | 0.42968628 | 1.69940499 | 0.0892429  | 0.31101075 |
| Pmepa1      | 1587.28904 | 0.72999905 | 0.27187473 | 2.6850566  | 0.00725175 | 0.06152319 |
| Gm6329      | 80.6403632 | 0.72948117 | 0.40180123 | 1.81552745 | 0.06944289 | 0.26821738 |
| Comp        | 43.3638657 | 0.72938513 | 0.43214605 | 1.68782091 | NA         | NA         |
| Cilp2       | 173.06569  | 0.72929115 | 0.32167984 | 2.26713354 | 0.02338207 | 0.13654321 |
| Fam101a     | 6.62242572 | 0.72869591 | 0.40431031 | 1.8023184  | 0.07149533 | 0.27243906 |
| Rnf39       | 41.0267238 | 0.72838522 | 0.38641395 | 1.88498687 | 0.05943161 | 0.24463234 |
| Ccdc96      | 98.1987665 | 0.72821815 | 0.34816863 | 2.09156739 | 0.03647723 | 0.18114137 |
| Spats1      | 526.282706 | 0.72811726 | 0.19810539 | 3.67540361 | 0.00023747 | 0.00485915 |
| Serhl       | 1023.94108 | 0.72807025 | 0.26220023 | 2.77677196 | 0.00549017 | 0.05054921 |

|             |            |            |            |            |            |            |
|-------------|------------|------------|------------|------------|------------|------------|
| MlIt3       | 2046.77634 | 0.72785324 | 0.3282493  | 2.2173794  | 0.02659718 | 0.14761338 |
| Fam184a     | 155.105749 | 0.72759272 | 0.41099734 | 1.77031006 | 0.0766755  | 0.28423856 |
| Il9r        | 5.76638854 | 0.7273069  | 0.39138399 | 1.85829498 | 0.06312714 | NA         |
| Tnfsf11     | 9.43886784 | 0.72685639 | 0.4307106  | 1.68757488 | 0.09149287 | 0.3150588  |
| Pcdhga2     | 61.8795507 | 0.72582596 | 0.36879495 | 1.96810169 | 0.04905634 | 0.2168491  |
| Blvra       | 893.129949 | 0.72564262 | 0.21534989 | 3.36959828 | 0.00075278 | 0.01191432 |
| Epas1       | 3975.68075 | 0.72563318 | 0.31625918 | 2.29442563 | 0.02176606 | 0.13055868 |
| Phtf1os     | 80.7871032 | 0.72535438 | 0.42431259 | 1.70948115 | 0.08736186 | 0.30760242 |
| P2rx4       | 1528.49256 | 0.72509685 | 0.29408059 | 2.46563998 | 0.01367687 | 0.09541904 |
| Stra6       | 34.695252  | 0.72376457 | 0.43131189 | 1.67805386 | 0.09333659 | 0.31823662 |
| 9030404E10F | 20.6958953 | 0.72368787 | 0.4238522  | 1.7074062  | 0.08774658 | 0.30837221 |
| Atp6v0d1    | 6820.78714 | 0.72349113 | 0.14873389 | 4.86433272 | 1.15E-06   | 6.27E-05   |
| Egr1        | 636.693536 | 0.72311639 | 0.3526764  | 2.05036796 | NA         | NA         |
| Spata31d1b  | 82.6894387 | 0.72261681 | 0.40297143 | 1.79322094 | 0.0729376  | 0.27537088 |
| Sfmbt2      | 4229.37578 | 0.72209388 | 0.29802366 | 2.42294146 | 0.01539541 | 0.1033293  |
| Pcdh19      | 432.141688 | 0.72193642 | 0.33344624 | 2.16507588 | 0.03038188 | 0.16059434 |
| Zfp352      | 20.3404447 | 0.72163432 | 0.42489453 | 1.69838458 | 0.0894352  | 0.31119611 |
| Ccdc28b     | 506.684063 | 0.7215953  | 0.3238388  | 2.22825463 | 0.02586354 | 0.14538871 |
| Slc18a3     | 4.37741712 | 0.72020902 | 0.37941943 | 1.89818696 | 0.05767146 | NA         |
| D730045A05  | 4.49400983 | 0.71993382 | 0.3498233  | 2.05799274 | 0.03959083 | NA         |
| Tomm6os     | 34.5157444 | 0.7198599  | 0.41872453 | 1.719173   | 0.08558288 | 0.30351181 |
| Obscn       | 30.9161529 | 0.71945329 | 0.40737554 | 1.76606893 | 0.07738429 | 0.28561324 |
| Pus7l       | 944.440534 | 0.71928471 | 0.18238155 | 3.94384587 | 8.02E-05   | 0.00206109 |
| Cyp7b1      | 300.787376 | 0.71925958 | 0.27876441 | 2.5801701  | 0.00987517 | 0.07677191 |
| Lyzl4       | 3.86672779 | 0.71884274 | 0.36434445 | 1.97297569 | 0.04849833 | NA         |
| Hoxa1       | 312.829119 | 0.71857779 | 0.40331092 | 1.78169681 | 0.07479869 | 0.27981583 |
| Gpr37l1     | 33.3899871 | 0.71803967 | 0.42047707 | 1.70767854 | 0.08769601 | 0.30833385 |
| Mfsd1       | 11307.6611 | 0.71788525 | 0.14514505 | 4.94598519 | 7.58E-07   | 4.41E-05   |
| Aff2        | 103.704451 | 0.71771001 | 0.4310909  | 1.66486932 | 0.09593883 | 0.32370249 |
| Slc39a4     | 5729.06053 | 0.71752952 | 0.23456675 | 3.05895672 | 0.00222109 | 0.02634646 |
| Nek10       | 43.1903767 | 0.71752886 | 0.4167345  | 1.72178897 | 0.08510775 | 0.30251673 |
| Tpsg1       | 18.8878535 | 0.71747099 | 0.41428351 | 1.73183572 | 0.08330282 | 0.29895739 |
| Pdpf        | 1698.20769 | 0.71729449 | 0.2436887  | 2.94348681 | 0.00324538 | 0.03461858 |
| Bcl2l10     | 19.3255068 | 0.7167726  | 0.43161224 | 1.66068647 | 0.09677643 | 0.32506387 |
| Rarres1     | 35.4430777 | 0.71668605 | 0.41560266 | 1.72445013 | 0.08462661 | 0.301703   |
| Pdlim2      | 82.3760721 | 0.71636848 | 0.3909133  | 1.83255078 | 0.0668694  | 0.26268598 |
| Tnfaip2     | 34.4235247 | 0.71610891 | 0.38657211 | 1.85245881 | 0.06395997 | 0.25595508 |
| Rab7l1      | 920.459616 | 0.71586334 | 0.19839394 | 3.60829232 | 0.00030822 | 0.00597645 |
| Mpdz        | 537.317735 | 0.71573502 | 0.36789801 | 1.94547128 | 0.05171828 | 0.224078   |
| Stx11       | 25.3563854 | 0.71531889 | 0.40102954 | 1.78370624 | 0.07447141 | 0.2789942  |
| Vgf         | 9.46621132 | 0.71460677 | 0.42221507 | 1.69251837 | 0.09054718 | 0.31332569 |

|             |            |             |            |            |            |            |
|-------------|------------|-------------|------------|------------|------------|------------|
| Fzd4        | 422.90267  | 0.7145428   | 0.25949919 | 2.7535454  | 0.00589536 | 0.05307714 |
| Slc43a1     | 1200.60623 | 0.71454222  | 0.39576518 | 1.80547014 | 0.07100114 | 0.27115393 |
| Grn         | 13950.6859 | 0.71427658  | 0.20534721 | 3.47838464 | 0.00050445 | 0.00870658 |
| Foxl2os     | 73.8786152 | 0.71422727  | 0.43042996 | 1.65933447 | 0.09704841 | 0.32560947 |
| Oxct2a      | 17.4485215 | 0.71376428  | 0.43172697 | 1.65327703 | 0.0982745  | 0.32795422 |
| H2-Eb2      | 49.0394452 | 0.71341187  | 0.42748111 | 1.66887345 | 0.09514246 | 0.32213378 |
| Entpd5      | 1091.26312 | 0.71287269  | 0.21794235 | 3.27092312 | 0.00107197 | 0.01539271 |
| 2410012M07  | 1103.90649 | 0.71213082  | 0.22296422 | 3.19392429 | 0.00140353 | 0.01871894 |
| Phtf1       | 2160.46442 | 0.71205839  | 0.20377459 | 3.49434339 | 0.00047523 | 0.00833178 |
| Perp        | 855.862621 | 0.71153142  | 0.21447112 | 3.31760942 | 0.00090791 | 0.01360208 |
| Sstr3       | 15.8737912 | 0.711111123 | 0.43171817 | 1.64716537 | 0.09952406 | 0.32999971 |
| Col11a2     | 35.139367  | 0.71109967  | 0.39086136 | 1.8193143  | 0.06886349 | 0.26700698 |
| Cpa4        | 4.88963146 | 0.71098742  | 0.38769107 | 1.833902   | 0.06666854 | NA         |
| Smr3a       | 30.4411578 | 0.71067425  | 0.43119093 | 1.64816607 | 0.0993186  | 0.3298107  |
| Sln3        | 171.497642 | 0.71022298  | 0.32397783 | 2.19219623 | 0.02836534 | 0.15439601 |
| L3hypdh     | 277.184077 | 0.7098023   | 0.34667714 | 2.0474448  | 0.04061443 | 0.19303026 |
| Uba7        | 50.6646178 | 0.70975189  | 0.43161855 | 1.64439617 | 0.1000944  | 0.33125515 |
| Myo5a       | 2464.20312 | 0.70940656  | 0.30887308 | 2.29675751 | 0.02163261 | 0.13008842 |
| Manba       | 7061.19934 | 0.70932158  | 0.32877973 | 2.1574371  | 0.03097162 | 0.16277111 |
| lsg15       | 4.73064387 | 0.70861191  | 0.38623549 | 1.83466287 | 0.06655566 | NA         |
| Sertad3     | 1229.13327 | 0.70813323  | 0.21417486 | 3.30633225 | 0.00094526 | 0.01398576 |
| Adamts10    | 531.267947 | 0.70799797  | 0.28008381 | 2.52780753 | 0.01147773 | 0.08472551 |
| Hoxb8       | 6.71308144 | 0.70794854  | 0.39296462 | 1.80155795 | 0.07161498 | 0.2726443  |
| Lhfp        | 95.4056398 | 0.70782706  | 0.34616011 | 2.04479675 | 0.0408749  | 0.19369391 |
| Lgals9      | 397.966274 | 0.70765845  | 0.37933794 | 1.86550929 | 0.06211005 | 0.25113713 |
| Efcab5      | 13.2665755 | 0.70743689  | 0.43038517 | 1.64372971 | 0.10023205 | 0.33156957 |
| Cpe         | 2699.34157 | 0.7072848   | 0.25647288 | 2.75773718 | 0.0058203  | 0.05263288 |
| Cped1       | 8.80757903 | 0.70699956  | 0.42875875 | 1.6489449  | 0.09915892 | 0.32942115 |
| Dcbld1      | 2730.29663 | 0.70664514  | 0.25887176 | 2.72971119 | 0.00633898 | 0.05577716 |
| Zfp711      | 267.622606 | 0.70644939  | 0.25918834 | 2.72562181 | 0.00641805 | 0.05626104 |
| Tdpoz2      | 3.86539738 | 0.70593927  | 0.34826102 | 2.0270407  | 0.04265825 | NA         |
| Sorbs3      | 206.715808 | 0.70565044  | 0.33891386 | 2.08209376 | 0.03733391 | 0.18326376 |
| Gm2022      | 54.6579469 | 0.70542961  | 0.43119501 | 1.63598743 | 0.10184222 | 0.33511391 |
| 1700106J16R | 7.66180263 | 0.70537319  | 0.42395796 | 1.66378096 | 0.09615621 | 0.32400358 |
| Ropn1l      | 40.3594975 | 0.70513711  | 0.39255551 | 1.79627364 | 0.07245101 | 0.27446666 |
| Map6        | 1148.43464 | 0.70473008  | 0.22050771 | 3.19594295 | 0.00139375 | 0.01865246 |
| Cpb2        | 6.59437858 | 0.70378736  | 0.38206522 | 1.84206078 | 0.06546626 | 0.25931376 |
| Mamld1      | 19.3962358 | 0.70312495  | 0.43219728 | 1.62686113 | 0.1037666  | 0.33917927 |
| Tspyl4      | 505.822579 | 0.70305356  | 0.19463348 | 3.61219228 | 0.00030362 | 0.00589461 |
| Rspo2       | 13.1026958 | 0.70300063  | 0.43019359 | 1.63414947 | 0.10222747 | 0.3358847  |
| Ky          | 32.1941483 | 0.70268861  | 0.43183128 | 1.62722954 | 0.10368836 | 0.33917927 |



|             |            |            |            |            |            |            |
|-------------|------------|------------|------------|------------|------------|------------|
| Rnf128      | 890.199338 | 0.70248951 | 0.4322563  | 1.62516895 | 0.10412657 | 0.33939891 |
| Abca14      | 8.90634713 | 0.70109188 | 0.4254872  | 1.64773906 | 0.09940623 | 0.32995504 |
| Otud6a      | 439.476976 | 0.70106202 | 0.39296881 | 1.78401441 | 0.07442132 | 0.27887373 |
| Actg2       | 4.56259814 | 0.70081819 | 0.3877877  | 1.80722129 | 0.07072778 | NA         |
| 2210013O21I | 812.928398 | 0.69953225 | 0.21236962 | 3.29393749 | 0.00098794 | 0.01445299 |
| 1700001K19F | 6.82482104 | 0.69929422 | 0.40403428 | 1.73077944 | 0.08349111 | 0.29916365 |
| Pqlc2       | 612.749159 | 0.69840235 | 0.21668912 | 3.22306154 | 0.00126828 | 0.01738655 |
| Hapln4      | 146.23128  | 0.69839211 | 0.33228193 | 2.1018059  | 0.03557028 | 0.17860945 |
| Tsix        | 504.481347 | 0.69707724 | 0.31502566 | 2.21276341 | 0.02691396 | 0.14878742 |
| E530011L22R | 29.5549703 | 0.69679011 | 0.43144392 | 1.61501895 | 0.10630659 | 0.34355233 |
| Tma7        | 2351.65478 | 0.69598812 | 0.24965372 | 2.78781397 | 0.0053065  | 0.0492665  |
| Dock3       | 203.989833 | 0.69591564 | 0.37511188 | 1.85522152 | 0.0635646  | 0.25483194 |
| Rrh         | 5.99531921 | 0.6957047  | 0.40880655 | 1.7017944  | 0.08879392 | 0.31002115 |
| Bad         | 1242.86303 | 0.69552932 | 0.26026678 | 2.67237073 | 0.00753174 | 0.06344857 |
| Folr1       | 4105.45841 | 0.69544761 | 0.32390811 | 2.14705221 | 0.03178912 | 0.16589016 |
| Kctd11      | 148.340424 | 0.69509609 | 0.26369777 | 2.63595738 | 0.00839003 | 0.06863404 |
| Slitrk5     | 28.5947291 | 0.6949111  | 0.42918598 | 1.61913745 | 0.10541769 | 0.34181621 |
| Gdpd2       | 33.1418228 | 0.69450752 | 0.43094509 | 1.61159166 | 0.10705083 | 0.34516082 |
| Naprt1      | 328.988986 | 0.69411046 | 0.28990114 | 2.39430053 | 0.0166521  | 0.10917233 |
| Ccdc17      | 54.6856522 | 0.69361596 | 0.3675898  | 1.88692931 | 0.05916983 | 0.24400692 |
| Nsun7       | 9.25943624 | 0.69336649 | 0.40977604 | 1.69206208 | 0.09063414 | 0.31342039 |
| Dnaja4      | 204.650066 | 0.69292871 | 0.30384443 | 2.28053779 | 0.02257581 | 0.13364159 |
| Skida1      | 922.869252 | 0.69288936 | 0.23940479 | 2.89421682 | 0.00380106 | 0.03845818 |
| S100a1      | 1828.14927 | 0.69192641 | 0.43097549 | 1.60548899 | 0.10838623 | 0.34788737 |
| Nckap5l     | 773.871004 | 0.69171422 | 0.30804474 | 2.2454992  | 0.0247361  | 0.1416315  |
| Jpx         | 3.75454373 | 0.69153391 | 0.36048716 | 1.91833159 | 0.05506898 | NA         |
| Agtpbp1     | 2067.34057 | 0.691476   | 0.31257285 | 2.21220752 | 0.02695233 | 0.14889367 |
| Bahd1       | 2318.84182 | 0.69129049 | 0.21767752 | 3.17575502 | 0.00149447 | 0.01955148 |
| 1700001L19F | 34.941802  | 0.69070973 | 0.4118677  | 1.67701843 | 0.09353888 | 0.3186469  |
| Kctd1       | 371.411507 | 0.69054593 | 0.25213415 | 2.73880363 | 0.00616632 | 0.05463956 |
| Ttll13      | 283.655015 | 0.69031814 | 0.238382   | 2.89584839 | 0.00378135 | 0.03835929 |
| Nsf         | 14152.5863 | 0.69013079 | 0.21474334 | 3.21374712 | 0.00131015 | 0.01773421 |
| 0610031J06R | 6951.28508 | 0.68999292 | 0.18230406 | 3.78484674 | 0.0001538  | 0.0034671  |
| Gylt1b      | 1143.34397 | 0.68938528 | 0.22966643 | 3.00168064 | 0.00268494 | 0.0301469  |
| Padi6       | 70.3128987 | 0.68872341 | 0.37688138 | 1.82742753 | 0.06763551 | 0.26401773 |
| Was         | 811.210522 | 0.6886093  | 0.20529355 | 3.35426666 | 0.00079576 | 0.01243699 |
| lp6k2       | 1037.90628 | 0.68830423 | 0.17954403 | 3.83362365 | 0.00012627 | 0.00295725 |
| Tgfbr2      | 231.354101 | 0.68824656 | 0.36863991 | 1.86698874 | 0.06190316 | 0.25069168 |
| Cga         | 29.1053494 | 0.6882458  | 0.42715725 | 1.61122352 | 0.10713101 | 0.34521227 |
| Dlx1        | 29.9069676 | 0.68824268 | 0.43048839 | 1.59874855 | 0.10987649 | 0.35030265 |
| Glt8d2      | 17.7084344 | 0.68781611 | 0.4300801  | 1.59927444 | 0.10975964 | 0.35027131 |

|             |            |            |            |            |            |            |
|-------------|------------|------------|------------|------------|------------|------------|
| Ppp1r10     | 4223.32914 | 0.6874007  | 0.25885363 | 2.65555747 | 0.00791774 | 0.0659501  |
| Eqtn        | 10.5441782 | 0.68696003 | 0.43203694 | 1.5900493  | 0.11182369 | 0.35361429 |
| Pramef25    | 22.4610507 | 0.68692845 | 0.39875104 | 1.72270009 | NA         | NA         |
| Tnfrsf18    | 9.43907932 | 0.68645065 | 0.43079128 | 1.5934646  | 0.111056   | 0.35238358 |
| Kcnc1       | 6.2512012  | 0.68628041 | 0.40163296 | 1.70872532 | 0.08750184 | 0.30785998 |
| Igf2        | 149.901351 | 0.68624448 | 0.42487626 | 1.61516316 | 0.10627537 | 0.3435228  |
| Hk3         | 5.54887243 | 0.68608241 | 0.39994362 | 1.71544781 | 0.08626316 | NA         |
| Cbln1       | 548.651594 | 0.68594356 | 0.37148138 | 1.84650858 | 0.06481839 | 0.25789153 |
| Crtc3       | 404.246871 | 0.68537285 | 0.26589503 | 2.57760684 | 0.00994871 | 0.07718724 |
| F8a         | 335.170116 | 0.68442703 | 0.29993687 | 2.2819036  | 0.02249503 | 0.13331564 |
| Ucp2        | 12647.0986 | 0.68441367 | 0.26820162 | 2.55186261 | 0.01071488 | 0.08096552 |
| 1700028K03F | 11.244794  | 0.68429961 | 0.42738564 | 1.60112916 | 0.10934832 | 0.34938887 |
| Snora31     | 127.356815 | 0.68386523 | 0.28371444 | 2.41039985 | 0.01593505 | 0.10575075 |
| Tcte2       | 38.9913651 | 0.68369945 | 0.38319524 | 1.78420654 | 0.07439011 | 0.27887373 |
| Prss23      | 13.8226851 | 0.68295444 | 0.41111706 | 1.66121648 | NA         | NA         |
| Fmo1        | 37.1461287 | 0.68280245 | 0.43224513 | 1.57966485 | 0.11418364 | 0.35801802 |
| Ap4s1       | 548.73763  | 0.68253258 | 0.18489679 | 3.69142479 | 0.000223   | 0.00464074 |
| Klhl41      | 14.659635  | 0.68250978 | 0.43206751 | 1.57963689 | 0.11419005 | 0.35801802 |
| Zfp212      | 2066.97241 | 0.68244921 | 0.18468745 | 3.69515753 | 0.00021975 | 0.00458088 |
| Ptprm       | 97.0502739 | 0.68233852 | 0.41945771 | 1.6267159  | 0.10379745 | 0.33917927 |
| Tmem62      | 358.348297 | 0.68226859 | 0.36228676 | 1.88322805 | 0.05966947 | 0.24522196 |
| Nanos1      | 1045.14703 | 0.6822192  | 0.22276126 | 3.06255764 | 0.00219454 | 0.02615121 |
| Mthfsd      | 836.32393  | 0.68218715 | 0.22131885 | 3.08237251 | 0.00205358 | 0.02492988 |
| Hnf1b       | 51.1703181 | 0.68185712 | 0.34960631 | 1.95035702 | 0.05113358 | 0.22261431 |
| Lgals3bp    | 198.024261 | 0.68182807 | 0.30261828 | 2.25309609 | 0.02425309 | 0.13982331 |
| Lox         | 63.2654379 | 0.68148861 | 0.34754516 | 1.96086346 | NA         | NA         |
| Grik5       | 476.996453 | 0.68144883 | 0.2597719  | 2.62325849 | 0.00870932 | 0.07036397 |
| Prkcg       | 745.221139 | 0.68134679 | 0.25933249 | 2.62730974 | 0.0086063  | 0.06989043 |
| Zfp133-ps   | 62.5737951 | 0.67988003 | 0.37584366 | 1.80894373 | 0.07045975 | 0.27021443 |
| Grin3a      | 6.2189458  | 0.67969311 | 0.4009283  | 1.69529841 | 0.09001883 | 0.31253583 |
| Daglb       | 361.556813 | 0.6796498  | 0.27013995 | 2.51591738 | 0.0118723  | 0.08670295 |
| Gpr12       | 3.72466401 | 0.67926456 | 0.36023556 | 1.88561218 | 0.05934723 | NA         |
| Armc7       | 369.052818 | 0.67918238 | 0.27539531 | 2.46620899 | 0.01365516 | 0.09535314 |
| Impg2       | 7.09062669 | 0.67897684 | 0.35714295 | 1.90113466 | NA         | NA         |
| Gpatch3     | 776.684216 | 0.67887125 | 0.23126021 | 2.93552988 | 0.00332979 | 0.03515376 |
| Shisa7      | 857.814113 | 0.67857919 | 0.31397047 | 2.16128348 | 0.03067345 | 0.16175069 |
| Trpc1       | 104.136547 | 0.67804096 | 0.40504034 | 1.67400847 | 0.09412893 | 0.3197668  |
| 4930590L20F | 11.5070859 | 0.67803611 | 0.41434911 | 1.63638847 | 0.10175831 | 0.3350505  |
| Trim10      | 36.4482261 | 0.67794981 | 0.42557151 | 1.59303382 | 0.1111526  | 0.35254622 |
| Nt5m        | 344.028903 | 0.67792975 | 0.25158216 | 2.69466547 | 0.00704593 | 0.06030338 |
| Caskin1     | 283.180689 | 0.67776179 | 0.32266389 | 2.10051951 | 0.03568317 | 0.17900288 |

|             |            |            |            |            |            |            |
|-------------|------------|------------|------------|------------|------------|------------|
| Socs2       | 4028.46872 | 0.67717732 | 0.1607931  | 4.21148235 | 2.54E-05   | 0.00080352 |
| Slc38a4     | 25131.8222 | 0.6767766  | 0.27176721 | 2.49028053 | 0.01276423 | 0.09076202 |
| Il20rb      | 113.718897 | 0.67598273 | 0.34312008 | 1.9701054  | 0.04882629 | 0.21621299 |
| Stox1       | 83.9030019 | 0.67585534 | 0.34544994 | 1.95644945 | 0.05041223 | 0.2207437  |
| Amotl2      | 6815.72506 | 0.67544799 | 0.21359243 | 3.16232174 | 0.00156517 | 0.02017579 |
| Bmp2k       | 266.782112 | 0.67493977 | 0.27652895 | 2.44075624 | 0.01465654 | 0.1000544  |
| Gm9926      | 6.50722325 | 0.67449452 | 0.39855455 | 1.69235181 | 0.09057891 | 0.31332569 |
| Dpf3        | 25.7948572 | 0.67378872 | 0.42763591 | 1.57561307 | 0.115115   | 0.36004695 |
| Ndr3        | 2171.75638 | 0.67343818 | 0.1819061  | 3.70211986 | 0.00021381 | 0.00449917 |
| Epn3        | 8.5489028  | 0.6731671  | 0.39492804 | 1.70453104 | 0.08828192 | 0.3092751  |
| Decr2       | 3523.57525 | 0.67249533 | 0.18936638 | 3.55129204 | 0.00038334 | 0.00706206 |
| Oxgr1       | 5.93690505 | 0.67248519 | 0.37161474 | 1.80963003 | 0.07035318 | 0.27004374 |
| 4921507P07F | 23.977666  | 0.67148492 | 0.41090812 | 1.63414858 | 0.10222766 | 0.3358847  |
| Chst2       | 162.808453 | 0.67102579 | 0.34994391 | 1.91752383 | 0.05517142 | 0.23327099 |
| Kcnc4       | 124.955759 | 0.67089708 | 0.29269075 | 2.29217046 | 0.02189581 | 0.13106302 |
| Anxa9       | 76.7616066 | 0.67085621 | 0.36058897 | 1.86044572 | 0.06282249 | 0.25303096 |
| Cyp2b23     | 1002.80086 | 0.67060471 | 0.42676771 | 1.57135765 | 0.1160996  | 0.36215582 |
| Fbxl22      | 11.1232761 | 0.67044689 | 0.43191481 | 1.55226648 | 0.12059848 | 0.36940975 |
| Myh13       | 2163.27384 | 0.67039524 | 0.32815053 | 2.04295035 | 0.04105735 | 0.19412676 |
| Ush2a       | 4.34218456 | 0.67032288 | 0.37171522 | 1.80332375 | 0.07133739 | NA         |
| Tbx3os2     | 62.3705187 | 0.67001461 | 0.3406201  | 1.96704364 | 0.04917818 | 0.21726417 |
| Tnfrsf4     | 64.0933494 | 0.67000485 | 0.35631192 | 1.88038856 | 0.06005514 | 0.24644423 |
| Dnajb4      | 431.009184 | 0.66998768 | 0.21483034 | 3.11868281 | 0.00181661 | 0.02274571 |
| Tiam2       | 1388.53041 | 0.66951217 | 0.34632204 | 1.93320692 | 0.05321071 | 0.22884208 |
| Chmp2b      | 3266.96357 | 0.66939458 | 0.17510145 | 3.82289565 | 0.00013189 | 0.00306589 |
| Clca4       | 474.525323 | 0.66938316 | 0.4287181  | 1.56135968 | 0.11843891 | 0.36580804 |
| Itih4       | 3.7439922  | 0.6692745  | 0.35983869 | 1.85992922 | 0.06289554 | NA         |
| Pla2g2e     | 8.43020925 | 0.66827657 | 0.42578359 | 1.56952169 | 0.11652643 | 0.3624409  |
| Hecw1       | 7.7601759  | 0.66820977 | 0.38907463 | 1.71743342 | 0.08590001 | 0.30438997 |
| Cmtm7       | 6658.72166 | 0.66777959 | 0.22565983 | 2.95923117 | 0.00308408 | 0.03339866 |
| Hdgfl1      | 13.953557  | 0.6674602  | 0.4296445  | 1.55351738 | 0.12029958 | 0.36906269 |
| Saa1        | 134.30098  | 0.66730802 | 0.41900141 | 1.5926152  | 0.11124654 | 0.35271344 |
| Dkk1        | 529.346367 | 0.66712467 | 0.30495986 | 2.18758193 | 0.02870007 | 0.15542836 |
| Pfn4        | 38.1645002 | 0.66706077 | 0.39848839 | 1.67397793 | 0.09413494 | 0.3197668  |
| Prkch       | 108.312905 | 0.66521001 | 0.37371796 | 1.77997873 | 0.07507944 | 0.28025934 |
| Edn1        | 167.915163 | 0.66513059 | 0.36668213 | 1.81391602 | 0.06969066 | 0.26878953 |
| Chrn1       | 571.696701 | 0.66503938 | 0.24975009 | 2.66281936 | 0.0077489  | 0.0648913  |
| Ndn         | 537.394506 | 0.66497395 | 0.22205226 | 2.99467314 | 0.00274739 | 0.03069301 |
| Zfp641      | 5.5025738  | 0.66467003 | 0.39601521 | 1.67839522 | 0.09326997 | NA         |
| Mapt        | 4066.02279 | 0.66378555 | 0.26935874 | 2.46431785 | 0.01372743 | 0.09547055 |
| Phyhd1      | 518.224803 | 0.66321244 | 0.27572167 | 2.40536927 | 0.01615613 | 0.10686686 |

|             |            |            |            |            |            |            |
|-------------|------------|------------|------------|------------|------------|------------|
| Pex2        | 635.377762 | 0.66238342 | 0.29621856 | 2.23613067 | 0.02534321 | 0.14362693 |
| Fxyd4       | 281.908572 | 0.66212867 | 0.41084237 | 1.61163677 | 0.10704101 | 0.34516082 |
| Ccdc125     | 527.126142 | 0.66149146 | 0.22650776 | 2.92039207 | 0.00349591 | 0.0363402  |
| Cdh15       | 15.5129396 | 0.66146966 | 0.43197982 | 1.53125128 | 0.1257073  | 0.37885621 |
| Satb2       | 658.773354 | 0.66142688 | 0.25963772 | 2.54749912 | 0.01084981 | 0.08140944 |
| Gm14295     | 246.791765 | 0.66112327 | 0.25054087 | 2.63878415 | 0.00832039 | 0.0682911  |
| Steap1      | 243.90121  | 0.66093474 | 0.33261694 | 1.98707482 | 0.04691411 | 0.21073405 |
| Lrrc24      | 13.7348101 | 0.66072846 | 0.43028934 | 1.53554459 | 0.12465011 | 0.37720061 |
| Usp17lb     | 58.2728108 | 0.6606026  | 0.42406867 | 1.55777273 | 0.11928713 | 0.3673335  |
| Gusb        | 3165.92031 | 0.66025507 | 0.21437353 | 3.07992807 | 0.00207051 | 0.02500897 |
| Fam212a     | 191.772576 | 0.66014385 | 0.33936002 | 1.94526111 | 0.05174356 | 0.224078   |
| Gpx3        | 1798.54017 | 0.65990146 | 0.2207553  | 2.9892893  | 0.00279627 | 0.03114959 |
| Spi1        | 170.617849 | 0.65967164 | 0.28054189 | 2.35141941 | 0.01870194 | 0.11804173 |
| Iffo1       | 861.110432 | 0.65938544 | 0.19316921 | 3.41351207 | 0.00064131 | 0.01056468 |
| Atp2c2      | 46.8450301 | 0.65924726 | 0.40405351 | 1.63158403 | 0.10276714 | 0.33693244 |
| 3000002C10F | 122.791274 | 0.65909338 | 0.3013678  | 2.18700666 | 0.02874204 | 0.15542836 |
| 1700052K11F | 246.393153 | 0.65887656 | 0.23390546 | 2.8168499  | 0.00484972 | 0.04587468 |
| Ccdc89      | 81.4323283 | 0.65852169 | 0.328841   | 2.00255347 | 0.04522524 | 0.20624566 |
| Kcnk6       | 381.047126 | 0.65831703 | 0.22414619 | 2.93699858 | 0.00331406 | 0.03510687 |
| Ubap1l      | 385.090204 | 0.6582448  | 0.30292566 | 2.17295823 | 0.02978346 | 0.15861733 |
| Slc5a5      | 68.2431253 | 0.65794275 | 0.39578862 | 1.66235892 | 0.09644083 | 0.32441085 |
| Stk31       | 2062.42386 | 0.6573151  | 0.29466298 | 2.23073524 | 0.02569867 | 0.14500727 |
| Tgfb3       | 15.7772658 | 0.65726894 | 0.4269192  | 1.53956283 | 0.12366695 | 0.37554086 |
| Alpk1       | 5.87468427 | 0.65629364 | 0.41621326 | 1.57682059 | 0.11483681 | NA         |
| C030016D13I | 17.8364387 | 0.65624447 | 0.43024793 | 1.52527049 | 0.12719165 | 0.3809625  |
| Slc26a10    | 125.122288 | 0.65578342 | 0.36698355 | 1.7869559  | 0.07394462 | 0.27769291 |
| Gdap1l1     | 15.8529487 | 0.6555781  | 0.43065984 | 1.52226428 | 0.12794288 | 0.38211884 |
| 0610040J01R | 45.9958613 | 0.65542203 | 0.42394143 | 1.54602024 | 0.12209968 | 0.37232555 |
| Ube2h       | 2867.62991 | 0.65518899 | 0.2066279  | 3.17086407 | 0.00151986 | 0.01976202 |
| Gsdma3      | 19.907293  | 0.65483478 | 0.3918549  | 1.67111544 | 0.09469888 | 0.32105129 |
| Fgf22       | 8.87463868 | 0.65482501 | 0.42863789 | 1.52768811 | 0.12658999 | 0.37996545 |
| Gm4971      | 40.3515118 | 0.65477316 | 0.43189263 | 1.51605543 | 0.12950534 | 0.38455938 |
| Mxd1        | 507.841229 | 0.65450847 | 0.21268015 | 3.07743089 | 0.00208793 | 0.02511171 |
| Slc6a13     | 15.6918184 | 0.65425371 | 0.42722804 | 1.53139225 | 0.12567248 | 0.37885621 |
| Ankrd34a    | 21.1920767 | 0.65411739 | 0.43016321 | 1.52062607 | 0.1283537  | 0.3824439  |
| Glcci1      | 749.748823 | 0.65402095 | 0.25001671 | 2.61590898 | 0.00889903 | 0.07140804 |
| Tlx2        | 331.836874 | 0.65397719 | 0.40666513 | 1.60814671 | 0.10780305 | 0.3468029  |
| Rnf151      | 15.1591438 | 0.65389887 | 0.42672238 | 1.5323754  | 0.12542982 | 0.37863766 |
| Tubb4a      | 34.2101103 | 0.6538041  | 0.41253119 | 1.58485981 | 0.11299819 | 0.35614812 |
| Pgam2       | 280.797916 | 0.65321235 | 0.3864257  | 1.69039573 | 0.09095227 | 0.31400004 |
| Adamts1     | 17.3798296 | 0.65316015 | 0.4321343  | 1.51147491 | 0.1306675  | 0.38666893 |

|             |            |            |            |            |            |            |
|-------------|------------|------------|------------|------------|------------|------------|
| Fgd3        | 3.78316669 | 0.65181978 | 0.35350907 | 1.84385588 | 0.06520415 | NA         |
| Rarres2     | 24.0627766 | 0.651735   | 0.43167662 | 1.50977599 | 0.13110059 | 0.38737323 |
| Gm53        | 933.523255 | 0.65168669 | 0.19228735 | 3.38912921 | 0.00070115 | 0.01127568 |
| 4831440E17F | 154.648488 | 0.65135834 | 0.38626913 | 1.68628113 | 0.09174166 | 0.3153569  |
| Cd300e      | 13.2195391 | 0.65129238 | 0.4315088  | 1.50933741 | 0.13121258 | 0.38740968 |
| Socs5       | 679.184604 | 0.6506488  | 0.27084998 | 2.40224793 | 0.01629466 | 0.10746322 |
| Rbp1        | 413.904091 | 0.65061087 | 0.3216339  | 2.02283051 | 0.04309062 | 0.20009027 |
| Reep5       | 1972.3931  | 0.65033178 | 0.22840147 | 2.84731865 | 0.00440892 | 0.04271846 |
| Sdsl        | 17.1021488 | 0.65017777 | 0.42494574 | 1.53002539 | 0.12601044 | 0.37888407 |
| 8030411F24F | 8.6739088  | 0.64973468 | 0.38391096 | 1.69240984 | 0.09056786 | 0.31332569 |
| Esrp2       | 899.255956 | 0.64939957 | 0.31649859 | 2.05182451 | 0.04018672 | 0.19175934 |
| Mirlet7d    | 35.9073966 | 0.64936369 | 0.41719024 | 1.55651697 | 0.11958521 | 0.36801556 |
| 2810029C07F | 72.4832408 | 0.64934873 | 0.33924729 | 1.91408672 | 0.05560908 | 0.23467483 |
| Txnip       | 26837.0403 | 0.64908745 | 0.32397147 | 2.00353276 | 0.04512013 | 0.20600799 |
| Parp4       | 1051.28828 | 0.64875421 | 0.30259091 | 2.14399772 | 0.03203307 | 0.1664297  |
| 5930403L14F | 30.4004329 | 0.64809964 | 0.42010847 | 1.54269596 | 0.12290456 | 0.37417558 |
| Gpd1        | 70.7795312 | 0.64803925 | 0.31295286 | 2.07072482 | 0.03838452 | 0.18700428 |
| Pcdhga7     | 46.6303716 | 0.64795529 | 0.36743123 | 1.76347364 | 0.07782064 | 0.28677459 |
| Mcc         | 526.843782 | 0.64788766 | 0.35584989 | 1.82067686 | 0.06865599 | 0.26645104 |
| Mroh2a      | 3.72737869 | 0.64733789 | 0.37139669 | 1.7429824  | 0.08133669 | NA         |
| Tmem173     | 724.375861 | 0.64721997 | 0.38237425 | 1.6926348  | 0.090525   | 0.31332569 |
| 1700051A21f | 6.22123459 | 0.64705224 | 0.39121875 | 1.65393974 | 0.09813976 | 0.3276452  |
| Lmo7        | 4464.9229  | 0.64702817 | 0.25196011 | 2.56797863 | 0.01022935 | 0.07875048 |
| Dhrs11      | 690.030011 | 0.64691144 | 0.25891319 | 2.49856504 | 0.01246973 | 0.08948625 |
| Ttpal       | 656.71722  | 0.64655782 | 0.2574361  | 2.51152739 | 0.012021   | 0.08747547 |
| Fbp2        | 1066.68164 | 0.64584399 | 0.43227222 | 1.49406775 | 0.13515791 | 0.3927206  |
| Snhg18      | 144.699477 | 0.64581694 | 0.42441677 | 1.52165747 | 0.12809493 | 0.38211884 |
| C230035I16R | 50.972268  | 0.64577177 | 0.36006049 | 1.79350911 | 0.07289156 | 0.27533072 |
| Tax1bp3     | 335.261202 | 0.64551538 | 0.24287878 | 2.65776771 | 0.00786601 | 0.06562463 |
| Ydjc        | 1451.52881 | 0.64550405 | 0.19872032 | 3.24830416 | 0.00116095 | 0.01636804 |
| DQ267102    | 22.7150943 | 0.64504431 | 0.41705173 | 1.54667697 | 0.12194116 | 0.37203601 |
| Mpc2        | 1604.47398 | 0.6447411  | 0.23112925 | 2.78952616 | 0.00527852 | 0.04903603 |
| AY512931    | 34.9202376 | 0.64397852 | 0.41915785 | 1.5363628  | 0.12444943 | 0.37681328 |
| Oxnad1      | 2943.80218 | 0.64349305 | 0.189766   | 3.39098185 | 0.00069643 | 0.01121132 |
| Podnl1      | 11.7236338 | 0.64316683 | 0.43226995 | 1.48788236 | 0.13678192 | 0.39489535 |
| Sgpl1       | 11193.1232 | 0.64301383 | 0.19533778 | 3.29180475 | 0.00099547 | 0.01453569 |
| Igbp1b      | 13.3180122 | 0.64275287 | 0.43223677 | 1.48703886 | 0.13700455 | 0.3952064  |
| Galnt4      | 355.152577 | 0.64264599 | 0.23458406 | 2.7395126  | 0.00615304 | 0.05460836 |
| Lyrn1       | 274.271425 | 0.64238124 | 0.27716707 | 2.31766796 | 0.02046737 | 0.12575418 |
| Sesn3       | 1444.22797 | 0.64225879 | 0.23328888 | 2.75306221 | 0.00590407 | 0.05310246 |
| Crlf2       | 695.594204 | 0.64212411 | 0.2965281  | 2.16547469 | 0.03035135 | 0.16048754 |

|             |            |            |            |            |            |            |
|-------------|------------|------------|------------|------------|------------|------------|
| Scrn1       | 807.982054 | 0.64187004 | 0.3475395  | 1.84689812 | 0.06476191 | 0.25783728 |
| Ston2       | 2055.59871 | 0.6417314  | 0.30494211 | 2.1044368  | 0.03534036 | 0.17785695 |
| Usp17ld     | 8.73520256 | 0.64150532 | 0.41981945 | 1.52805049 | 0.1265     | 0.37981113 |
| Atp1b2      | 1258.4931  | 0.64115529 | 0.20614516 | 3.11021273 | 0.00186953 | 0.0232584  |
| Chad        | 3.99353365 | 0.6409518  | 0.36932473 | 1.73546949 | 0.08265768 | NA         |
| 2610034B18f | 784.926801 | 0.64048418 | 0.21269924 | 3.01121988 | 0.002602   | 0.02934283 |
| Kcnq2       | 308.994074 | 0.6402565  | 0.36406622 | 1.75862647 | 0.07864097 | 0.28897585 |
| Prdm11      | 27.8741668 | 0.64018091 | 0.42650582 | 1.50098985 | 0.13335819 | 0.39033562 |
| Bcl11b      | 58.7799742 | 0.63989472 | 0.40628696 | 1.57498218 | 0.11526056 | 0.3601547  |
| 4430402I18R | 25.6187618 | 0.63969705 | 0.40430857 | 1.58220008 | 0.1136039  | 0.35726072 |
| Col1a1      | 163.042166 | 0.63904094 | 0.40126883 | 1.59255066 | NA         | NA         |
| Nagpa       | 1244.43383 | 0.63900686 | 0.23679896 | 2.6985206  | 0.00696484 | 0.05978021 |
| Dok3        | 20.8115361 | 0.63865998 | 0.43211938 | 1.47797117 | 0.13941549 | 0.39927262 |
| Nxf3        | 2187.99    | 0.63857593 | 0.20297258 | 3.14611919 | 0.00165453 | 0.02105526 |
| Spag6       | 36.1199697 | 0.63815254 | 0.42181759 | 1.51286375 | 0.13031427 | 0.38615039 |
| B3gnt7      | 969.331572 | 0.63801821 | 0.34713825 | 1.83793693 | 0.0660717  | 0.26043013 |
| Mgll        | 186.319614 | 0.63772209 | 0.37133314 | 1.71738533 | 0.08590879 | 0.30438997 |
| Ptpn22      | 44.056044  | 0.63767818 | 0.40910337 | 1.55872141 | 0.11906233 | 0.36689611 |
| Uroc1       | 19.8707838 | 0.63752492 | 0.43197897 | 1.47582397 | 0.13999115 | 0.3999637  |
| Gramd3      | 78.9910274 | 0.63727988 | 0.32668441 | 1.9507508  | 0.0510867  | 0.2224908  |
| Paqr9       | 42.4368219 | 0.63636043 | 0.40856716 | 1.55754178 | 0.11934191 | 0.36742943 |
| Foxa1       | 54.8405717 | 0.63584622 | 0.43226524 | 1.47096309 | 0.1413011  | 0.40171844 |
| Myl4        | 416.566359 | 0.63580108 | 0.36210891 | 1.75582832 | 0.07911773 | 0.29028477 |
| Hoga1       | 44.8930665 | 0.63492158 | 0.37294988 | 1.70243137 | 0.08867453 | 0.30995588 |
| Lrrc39      | 11.0709442 | 0.63477803 | 0.43138748 | 1.47147994 | 0.14116137 | 0.40171844 |
| 1700020D05I | 22.6094239 | 0.63455808 | 0.42134973 | 1.50601278 | 0.13206389 | 0.38852168 |
| AF357359    | 368.646815 | 0.63450226 | 0.26846644 | 2.36343236 | 0.01810653 | 0.11573147 |
| Gm4285      | 31.2240945 | 0.6344137  | 0.38504291 | 1.64764414 | 0.09942572 | 0.32995504 |
| Ipo13       | 1976.074   | 0.63425092 | 0.25547083 | 2.48267447 | 0.01304002 | 0.09222734 |
| 1700012B07f | 21.800436  | 0.63412802 | 0.42935359 | 1.47693657 | 0.13969264 | 0.39961648 |
| Mb21d2      | 1773.00782 | 0.63404354 | 0.36846927 | 1.72075014 | 0.08529617 | 0.30297871 |
| Dip2a       | 1270.99786 | 0.6336866  | 0.25224453 | 2.51219162 | 0.01199839 | 0.08735346 |
| Tdrp        | 4919.08674 | 0.63350049 | 0.17102014 | 3.70424493 | 0.00021202 | 0.00447374 |
| Mmp12       | 22.110336  | 0.6333033  | 0.43002698 | 1.47270597 | 0.14083034 | 0.401182   |
| 1700037H04I | 3592.01609 | 0.63327413 | 0.26043957 | 2.43155876 | 0.01503401 | 0.10160534 |
| Sfrp2       | 265.409799 | 0.63278048 | 0.30218808 | 2.09399549 | 0.03626038 | 0.18058504 |
| AA465934    | 626.570184 | 0.63277962 | 0.28595493 | 2.21286491 | 0.02690696 | 0.14878742 |
| Nat8l       | 158.046954 | 0.63256323 | 0.42151635 | 1.5006849  | 0.13343708 | 0.39041957 |
| Akr1c13     | 38.0412409 | 0.63197263 | 0.38836233 | 1.62727583 | 0.10367853 | 0.33917927 |
| Il3ra       | 247.647154 | 0.63170266 | 0.34517644 | 1.83008628 | 0.06723704 | 0.2633085  |
| Card9       | 157.880055 | 0.63123236 | 0.33579438 | 1.87981814 | 0.06013287 | 0.24660502 |

|            |            |            |            |            |            |            |
|------------|------------|------------|------------|------------|------------|------------|
| Epha6      | 3.63703924 | 0.6306658  | 0.36790013 | 1.71423096 | 0.08648632 | NA         |
| Trhde      | 6.69355847 | 0.63040133 | 0.42031853 | 1.49981808 | 0.13366153 | 0.39085568 |
| C1qtnf4    | 79.5984443 | 0.63027349 | 0.34457073 | 1.82915563 | 0.0673763  | 0.26339085 |
| Pramef17   | 823.093929 | 0.62996723 | 0.28328226 | 2.22381464 | 0.02616092 | 0.14624947 |
| Zak        | 2051.13327 | 0.6296186  | 0.24677095 | 2.55142913 | 0.01072821 | 0.08098075 |
| Slc37a2    | 1261.17769 | 0.62918653 | 0.24692393 | 2.54809864 | 0.01083118 | 0.08140944 |
| Ifitm7     | 74.1653827 | 0.62913568 | 0.33400491 | 1.88361205 | 0.05961747 | 0.24520267 |
| Prss27     | 100.292834 | 0.62899416 | 0.33890396 | 1.85596581 | 0.06345843 | 0.25466892 |
| Tceanc2    | 1088.9265  | 0.62888328 | 0.28873435 | 2.17806883 | 0.02940091 | 0.15717603 |
| Adcy5      | 91.8329562 | 0.62872803 | 0.40153775 | 1.56580056 | 0.11739531 | 0.36395824 |
| Hivep3     | 23.950205  | 0.62861675 | 0.42474083 | 1.48000077 | 0.13887304 | 0.39830591 |
| Tal1       | 33.1509908 | 0.62838007 | 0.40050416 | 1.56897263 | 0.11665432 | 0.36260069 |
| Isyna1     | 7719.11269 | 0.6283747  | 0.15894366 | 3.95344286 | 7.70E-05   | 0.00198998 |
| Arg2       | 43.1340361 | 0.62794414 | 0.43143793 | 1.45546811 | 0.14553971 | 0.4089048  |
| Celf2      | 682.18707  | 0.62753895 | 0.34021004 | 1.84456326 | 0.0651011  | 0.2584176  |
| Dcun1d5    | 6791.69079 | 0.62675451 | 0.1748255  | 3.58502908 | 0.00033704 | 0.00644689 |
| Slc35g2    | 133.629199 | 0.62593783 | 0.31533756 | 1.98497706 | 0.04714702 | 0.21141389 |
| A930004D18 | 581.482615 | 0.62589904 | 0.27938075 | 2.24030839 | 0.02507091 | 0.14276005 |
| Lrrc56     | 426.694082 | 0.62548997 | 0.29538104 | 2.11756982 | 0.03421152 | 0.17358019 |
| Xaf1       | 4290.49247 | 0.62541188 | 0.32473583 | 1.92590969 | 0.05411565 | 0.23056233 |
| Gm4013     | 39.8039875 | 0.62530365 | 0.38525386 | 1.62309509 | 0.10456908 | 0.33994888 |
| Scmh1      | 1475.80795 | 0.62512732 | 0.18130342 | 3.44796211 | 0.00056483 | 0.00951649 |
| Kif21a     | 567.097909 | 0.62477729 | 0.34658858 | 1.80264825 | 0.07144347 | 0.27231301 |
| Tph1       | 9.35823005 | 0.62477364 | 0.42759021 | 1.46115047 | 0.14397415 | 0.40567894 |
| Mbd2       | 1176.55566 | 0.6241516  | 0.17718638 | 3.52257104 | 0.00042738 | 0.00771919 |
| Zc3h12b    | 16.640264  | 0.62410355 | 0.43227167 | 1.44377622 | 0.14880193 | 0.41380881 |
| Limd2      | 2117.42037 | 0.62398614 | 0.19669608 | 3.17233648 | 0.00151218 | 0.01969503 |
| 4930444M15 | 253.983927 | 0.62391244 | 0.30838997 | 2.02312817 | 0.04305994 | 0.20005532 |
| Ticam1     | 574.242024 | 0.62299073 | 0.23189691 | 2.68649869 | 0.00722052 | 0.06132515 |
| Hbegf      | 1084.54882 | 0.62280946 | 0.34295524 | 1.81600801 | 0.06936914 | 0.26819621 |
| Vasn       | 126.364171 | 0.62254572 | 0.29694525 | 2.0965     | 0.03603786 | 0.18008508 |
| Pdha2      | 111.296961 | 0.62232223 | 0.29192871 | 2.13176099 | 0.0330265  | 0.16974377 |
| 2310034G01 | 33.2986633 | 0.6220303  | 0.39918837 | 1.55823753 | 0.11917695 | 0.36713962 |
| Tlr4       | 6.93723565 | 0.62124969 | 0.3921855  | 1.58407102 | 0.11317756 | 0.35655018 |
| N6amt2     | 1512.49203 | 0.62037927 | 0.18206204 | 3.40751566 | 0.00065557 | 0.01074063 |
| Fbxo25     | 2608.717   | 0.6202067  | 0.2215877  | 2.79892211 | 0.00512735 | 0.04783169 |
| Ppm1e      | 132.617836 | 0.61970254 | 0.3543689  | 1.7487498  | 0.08033428 | 0.29222886 |
| Tc2n       | 99.8950249 | 0.61941454 | 0.41617979 | 1.488334   | 0.13666283 | 0.39487991 |
| 1700037C18 | 25.1048432 | 0.61917849 | 0.41520864 | 1.49124664 | 0.13589675 | 0.39361713 |
| Pbx3       | 1217.52655 | 0.61917244 | 0.34400853 | 1.79987525 | 0.07188034 | 0.27330346 |
| Gnas       | 9924.48986 | 0.61906675 | 0.18973433 | 3.26280835 | 0.00110314 | 0.01573848 |

|             |            |            |            |            |            |            |
|-------------|------------|------------|------------|------------|------------|------------|
| Ackr2       | 8.68845078 | 0.61871225 | 0.42040134 | 1.47171807 | 0.14109703 | 0.40171844 |
| Tacr3       | 6.49432472 | 0.6185043  | 0.38679519 | 1.5990486  | 0.1098098  | 0.35030265 |
| C130036L24F | 26.7753013 | 0.61829401 | 0.41266706 | 1.49828775 | 0.13405851 | 0.39131561 |
| Gm12942     | 683.363517 | 0.61811749 | 0.32894695 | 1.87907954 | 0.06023363 | 0.24686878 |
| Fbxw9       | 2671.12924 | 0.61808063 | 0.19519064 | 3.16654847 | 0.0015426  | 0.01994091 |
| Plekhb2     | 5408.83302 | 0.61789742 | 0.18172959 | 3.40009245 | 0.00067363 | 0.0109349  |
| Dbil5       | 74.5656024 | 0.61782875 | 0.38341148 | 1.61139869 | 0.10709285 | 0.34516082 |
| Rhof        | 75.784006  | 0.61778654 | 0.35178613 | 1.75614243 | 0.07906409 | 0.2901878  |
| Hectd2      | 495.452862 | 0.61714382 | 0.36284635 | 1.70084065 | 0.08897291 | 0.31036738 |
| Olfcr3      | 6.0804406  | 0.61627101 | 0.41538256 | 1.48362273 | 0.13790904 | 0.39678509 |
| Prkg2       | 178.845934 | 0.61618446 | 0.34938406 | 1.76363072 | 0.07779417 | 0.28677459 |
| 2210016F16F | 2855.48278 | 0.61613212 | 0.19446919 | 3.16827621 | 0.00153346 | 0.01985579 |
| Dusp2       | 34.0116076 | 0.6160273  | 0.42142213 | 1.46178205 | 0.14380094 | 0.40541126 |
| Creb3l1     | 232.04751  | 0.61596472 | 0.23996974 | 2.56684334 | 0.0102629  | 0.07876795 |
| Gm9776      | 129.316216 | 0.61510268 | 0.30099271 | 2.04358001 | 0.04099506 | 0.19400916 |
| Il33        | 14.8079021 | 0.61473164 | 0.41316922 | 1.48784473 | 0.13679185 | 0.39489535 |
| Ggct        | 2311.63158 | 0.61463181 | 0.30484846 | 2.016188   | 0.04378032 | 0.20199689 |
| 9130230L23F | 14.6271193 | 0.6142553  | 0.43226484 | 1.42101612 | 0.15531207 | 0.42380383 |
| Pih1d2      | 64.6432722 | 0.61414397 | 0.34739502 | 1.76785482 | 0.07708518 | 0.28514548 |
| Map3k5      | 1943.40148 | 0.61395775 | 0.21661772 | 2.83429147 | 0.00459274 | 0.04408749 |
| Ccdc81      | 9.93595597 | 0.61358698 | 0.42797312 | 1.43370448 | 0.15165661 | 0.41871751 |
| Abhd15      | 58.0407604 | 0.61323335 | 0.41515543 | 1.47711749 | 0.13964415 | 0.39955955 |
| Fmn2        | 658.645286 | 0.61281561 | 0.35810217 | 1.71128708 | 0.08702813 | 0.30681806 |
| Stim2       | 1391.69937 | 0.61276893 | 0.22846578 | 2.68210376 | 0.00731608 | 0.06196749 |
| Gm8300      | 81.2344531 | 0.61261107 | 0.42973944 | 1.42554071 | 0.15400096 | 0.42207772 |
| Slc5a1      | 987.611296 | 0.61232844 | 0.33994942 | 1.80123397 | 0.07166601 | 0.27267578 |
| Enpp5       | 496.224606 | 0.61220001 | 0.3403563  | 1.79870333 | 0.07206562 | 0.27374022 |
| Vgll3       | 120.212197 | 0.61214947 | 0.41819318 | 1.46379592 | 0.14324972 | 0.40444379 |
| Adrb3       | 2687.60092 | 0.61177249 | 0.24276321 | 2.52003795 | 0.01173422 | 0.08599379 |
| Tomt        | 3.62242403 | 0.61126321 | 0.38452828 | 1.58964436 | 0.11191499 | NA         |
| Kcnab1      | 3.62242403 | 0.61126321 | 0.38452828 | 1.58964436 | 0.11191499 | NA         |
| Tbx3        | 15119.8034 | 0.61119342 | 0.19701472 | 3.1022729  | 0.00192041 | 0.02375837 |
| Rimkla      | 280.329945 | 0.61099349 | 0.36332641 | 1.6816655  | 0.09263372 | 0.31695204 |
| Cxcl5       | 9.20091843 | 0.61088862 | 0.34340582 | 1.77891165 | 0.07525425 | 0.28064941 |
| Gm2027      | 48.3970807 | 0.61074871 | 0.43029899 | 1.41935894 | 0.1557944  | 0.4243942  |
| E330033B04F | 17.7962254 | 0.61063222 | 0.43180592 | 1.41413582 | 0.15732203 | 0.42689144 |
| Mmgt2       | 483.518737 | 0.61041435 | 0.21245194 | 2.8731879  | 0.00406352 | 0.04019838 |
| Il10rb      | 320.741414 | 0.60972964 | 0.35382906 | 1.72323224 | 0.08484654 | 0.30207154 |
| Cox7a1      | 1738.54427 | 0.60936584 | 0.29986075 | 2.03216272 | 0.04213719 | 0.19725327 |
| Micall1     | 1081.43574 | 0.60906361 | 0.27693878 | 2.19927171 | 0.02785861 | 0.15233095 |
| Ankrd35     | 2803.733   | 0.60837042 | 0.2777759  | 2.19014833 | 0.02851348 | 0.15484434 |



|             |            |            |            |            |            |            |
|-------------|------------|------------|------------|------------|------------|------------|
| Capns1      | 31153.2308 | 0.60809035 | 0.28049883 | 2.16788906 | 0.03016713 | 0.15994852 |
| Parp8       | 61.1101269 | 0.60808328 | 0.42041528 | 1.44638718 | 0.14806863 | 0.41292308 |
| Scand1      | 843.477793 | 0.60803746 | 0.26726469 | 2.27503853 | 0.02290362 | 0.13501674 |
| Rbms3       | 4.35419402 | 0.60782499 | 0.37404449 | 1.62500721 | 0.10416102 | NA         |
| Pnp2        | 267.933741 | 0.6076699  | 0.37032401 | 1.64091414 | 0.10081524 | 0.33279315 |
| Fzd3        | 409.04352  | 0.60763601 | 0.31969899 | 1.90065041 | 0.05734782 | 0.23881336 |
| Ovol3       | 10.6092492 | 0.60716274 | 0.43076385 | 1.40950256 | 0.15868662 | 0.42902218 |
| Pla2g12a    | 781.665204 | 0.60708333 | 0.32455365 | 1.87051765 | 0.06141197 | 0.24957474 |
| Pcdhga5     | 27.8776684 | 0.60702778 | 0.41365079 | 1.46748851 | 0.14224321 | 0.40302949 |
| Gm13128     | 1409.07823 | 0.6061851  | 0.26034629 | 2.32838004 | 0.01989193 | 0.12344853 |
| Tril        | 76.3975419 | 0.60616203 | 0.43219153 | 1.40253101 | 0.16075674 | 0.43208565 |
| Slc6a14     | 3.84634708 | 0.6060437  | 0.33103315 | 1.83076436 | 0.06713572 | NA         |
| Fam115c     | 92.8858644 | 0.60528806 | 0.30916234 | 1.95783245 | 0.05024968 | 0.22043236 |
| Ica1        | 473.189457 | 0.60528359 | 0.35498943 | 1.70507498 | 0.08818044 | 0.30918323 |
| Ttc39c      | 1206.51165 | 0.60514913 | 0.39323867 | 1.53888509 | 0.12383235 | 0.37568579 |
| Rassf9      | 3.42262122 | 0.60459829 | 0.34662227 | 1.74425688 | 0.08111431 | NA         |
| Tmem141     | 292.089099 | 0.60373184 | 0.26883415 | 2.24574085 | 0.02472061 | 0.1416315  |
| Cxcl1       | 4.62535909 | 0.60358598 | 0.34127945 | 1.76859752 | 0.07696107 | NA         |
| Kbtbd13     | 44.2833505 | 0.60310188 | 0.41185469 | 1.46435598 | 0.14309671 | 0.40432552 |
| Sybu        | 5.10836283 | 0.60297519 | 0.4054211  | 1.4872812  | 0.13694056 | NA         |
| Pxdn        | 296.472505 | 0.60292656 | 0.37844229 | 1.59317967 | 0.11111989 | 0.35251437 |
| 4930539J05R | 9.73213086 | 0.60265286 | 0.4312447  | 1.39747307 | 0.16227136 | 0.43365074 |
| Gm364       | 629.640033 | 0.60211806 | 0.31636892 | 1.90321496 | 0.0570125  | 0.23814167 |
| Snta1       | 1480.75436 | 0.60192031 | 0.23544879 | 2.55648083 | 0.01057369 | 0.08021046 |
| Serpinf1    | 374.907203 | 0.60182123 | 0.36465187 | 1.6503994  | 0.09886127 | 0.32887155 |
| Rab40b      | 33.1993983 | 0.60144322 | 0.41328473 | 1.45527566 | 0.14559296 | 0.40898052 |
| Usp17lc     | 34.8154188 | 0.60128086 | 0.42871628 | 1.40251463 | 0.16076162 | 0.43208565 |
| Arhgap27    | 563.218923 | 0.60116316 | 0.21484637 | 2.79810708 | 0.00514031 | 0.04789509 |
| Oacyl       | 17.6300146 | 0.60114384 | 0.4322483  | 1.39073731 | 0.1643051  | 0.43721913 |
| Gm5         | 482.597528 | 0.60114051 | 0.29754254 | 2.02035147 | 0.04334694 | 0.20074101 |
| A630019I02R | 6.75519167 | 0.60064396 | 0.40421544 | 1.48595008 | 0.13729233 | 0.39568649 |
| Smim14      | 3615.65491 | 0.60050339 | 0.27344118 | 2.19609711 | 0.02808499 | 0.15324552 |
| 2010111I01R | 2565.81939 | 0.60043966 | 0.21585209 | 2.78171803 | 0.0054072  | 0.04999249 |
| 1700020L24F | 3.34743138 | 0.6001619  | 0.34614445 | 1.73384812 | 0.08294503 | NA         |
| Pygb        | 4668.66091 | 0.59978254 | 0.24299273 | 2.46831473 | 0.01357509 | 0.09496457 |
| Alg2        | 2375.01475 | 0.59971137 | 0.21294697 | 2.81624757 | 0.00485882 | 0.04593284 |
| 5031414D18I | 13.1609949 | 0.59960741 | 0.43136523 | 1.39002258 | 0.16452202 | 0.43755954 |
| Abca4       | 16.9351997 | 0.59942203 | 0.42586811 | 1.40752976 | 0.15927036 | 0.43014212 |
| Cmb1        | 55.6501187 | 0.59937444 | 0.39891877 | 1.50249746 | 0.13296868 | 0.38977816 |
| Nlrp4f      | 6765.2754  | 0.59927909 | 0.30908025 | 1.93891102 | 0.05251217 | 0.22668842 |
| Fmnl2       | 3758.05069 | 0.59915842 | 0.29923256 | 2.0023169  | 0.04525066 | 0.20630109 |

|             |            |            |            |            |            |            |
|-------------|------------|------------|------------|------------|------------|------------|
| Slc6a7      | 649.321661 | 0.59907257 | 0.22546913 | 2.65700489 | 0.00788383 | 0.06573804 |
| Dfna5       | 133.034772 | 0.59882439 | 0.33660741 | 1.77899944 | 0.07523985 | 0.28064941 |
| Nudt5       | 4439.88367 | 0.59863792 | 0.30278482 | 1.97710679 | 0.04802956 | 0.21432071 |
| Enpp4       | 1141.44265 | 0.59856462 | 0.35110202 | 1.70481681 | 0.0882286  | 0.30918323 |
| Pnoc        | 3.72029661 | 0.59847657 | 0.38038838 | 1.57333032 | 0.11564235 | NA         |
| Abtb2       | 398.910744 | 0.59836757 | 0.34188553 | 1.7501986  | 0.08008405 | 0.29193321 |
| Ptplb       | 3615.52467 | 0.59811009 | 0.18961189 | 3.15439123 | 0.00160833 | 0.0206363  |
| Prr13       | 4070.18609 | 0.59783663 | 0.20137752 | 2.96873571 | 0.00299028 | 0.0327247  |
| lah1        | 2181.14159 | 0.59782328 | 0.23631769 | 2.52974404 | 0.01141458 | 0.08456793 |
| Wfdc10      | 15.3500846 | 0.59781091 | 0.42803135 | 1.39665214 | 0.1625182  | 0.43388979 |
| Dnmt3l      | 3261.76042 | 0.59776738 | 0.32998229 | 1.81151351 | 0.0700614  | 0.26955092 |
| B230217C12f | 285.146938 | 0.59769533 | 0.2658778  | 2.24800768 | 0.0245757  | 0.14107668 |
| Ppa1        | 17180.4444 | 0.59761815 | 0.20702637 | 2.88667642 | 0.00389334 | 0.03923875 |
| Zfp326      | 2518.15244 | 0.59758608 | 0.26545717 | 2.25115817 | 0.02437552 | 0.14032901 |
| Gm13083     | 5.56984655 | 0.59753859 | 0.35762916 | 1.67083297 | 0.09475467 | NA         |
| Abcb9       | 39.5097798 | 0.59751107 | 0.417643   | 1.43067423 | 0.1525236  | 0.42010176 |
| Il17rb      | 24.2369239 | 0.5971295  | 0.40265482 | 1.48298114 | 0.13807942 | 0.39712837 |
| C530008M17  | 164.668456 | 0.59703365 | 0.34004447 | 1.75575167 | 0.07913082 | 0.29028477 |
| Csmd3       | 2.91278257 | 0.59674276 | 0.33034506 | 1.80642254 | 0.07085236 | NA         |
| Hoxa11os    | 8.02348336 | 0.59653072 | 0.3766436  | 1.58380684 | 0.11323768 | 0.35655018 |
| Slc22a13    | 14.5993047 | 0.59634249 | 0.42975814 | 1.38762348 | 0.16525173 | 0.43861233 |
| Noxred1     | 681.088195 | 0.59627924 | 0.20189891 | 2.95335542 | 0.0031434  | 0.03387594 |
| Egf         | 68.9419522 | 0.59622561 | 0.31303969 | 1.90463265 | 0.05682784 | 0.23756811 |
| Hoxc8       | 39.1066434 | 0.59599656 | 0.43178203 | 1.38031813 | 0.16748872 | 0.44231821 |
| Gm15441     | 41.9704977 | 0.59595854 | 0.39937879 | 1.4922138  | 0.13564311 | 0.39328705 |
| Rfx5        | 2811.83735 | 0.59547991 | 0.16621828 | 3.58251761 | 0.0003403  | 0.00648528 |
| Pard3b      | 35.0200205 | 0.59547916 | 0.42672534 | 1.39546237 | 0.16287645 | 0.43462627 |
| C330018D20l | 752.29358  | 0.59493121 | 0.25639509 | 2.32036898 | 0.02032093 | 0.12525197 |
| Plk2        | 3672.6419  | 0.59479268 | 0.2334879  | 2.54742398 | 0.01085215 | 0.08140944 |
| Nudt6       | 96.7254507 | 0.59476678 | 0.29913012 | 1.98832127 | 0.04677617 | 0.2102359  |
| Wbp1l       | 3501.0838  | 0.59411069 | 0.20486201 | 2.90005303 | 0.003731   | 0.03797167 |
| Dpm2        | 2100.73793 | 0.59370437 | 0.2060271  | 2.88168101 | 0.0039556  | 0.03962162 |
| Spata31d1a  | 163.422114 | 0.59353835 | 0.28743639 | 2.06493805 | 0.03892886 | 0.18833006 |
| Kcnt2       | 116.506887 | 0.5934422  | 0.37033532 | 1.6024456  | 0.10905711 | 0.34903212 |
| 4930405A21f | 12.2483596 | 0.59326934 | 0.43227159 | 1.37244581 | 0.1699247  | 0.44511837 |
| Klk9        | 6.05546261 | 0.59319493 | 0.41483076 | 1.42996851 | 0.15272606 | 0.42030588 |
| Kbtbd7      | 1175.39385 | 0.59307566 | 0.25039035 | 2.36860428 | 0.01785535 | 0.11450844 |
| Acsf5       | 1354.15155 | 0.59300477 | 0.21207553 | 2.79619609 | 0.0051708  | 0.04815038 |
| Zfp27       | 614.779496 | 0.5929868  | 0.25595017 | 2.31680563 | 0.02051432 | 0.12577215 |
| Kcnj3       | 9.80036268 | 0.59273816 | 0.40645011 | 1.45832944 | 0.14474976 | 0.40736725 |
| Nutm1       | 74.8549413 | 0.59249622 | 0.36253702 | 1.63430544 | 0.10219473 | 0.3358847  |

|             |            |            |            |            |            |            |
|-------------|------------|------------|------------|------------|------------|------------|
| Wdr5b       | 103.985758 | 0.59249444 | 0.30970848 | 1.91307141 | 0.05573891 | 0.23498367 |
| Glrb        | 215.367946 | 0.59187038 | 0.40014236 | 1.47914951 | 0.13910036 | 0.39888433 |
| B4galnt1    | 861.783462 | 0.59168172 | 0.30914649 | 1.9139202  | 0.05563035 | 0.23470093 |
| Atp13a4     | 14.4049614 | 0.5916326  | 0.40111214 | 1.47498054 | 0.14021778 | 0.4003272  |
| Mep1a       | 2.9486704  | 0.59153779 | 0.32928735 | 1.79641817 | 0.07242804 | NA         |
| Slc44a2     | 4469.4993  | 0.59099228 | 0.15951088 | 3.70502794 | 0.00021137 | 0.004466   |
| Paqr4       | 403.390669 | 0.59098152 | 0.25645173 | 2.30445518 | 0.02119711 | 0.12881446 |
| Gata3       | 51.0694282 | 0.59096566 | 0.4320657  | 1.36776806 | 0.17138469 | 0.44770759 |
| Epb4.1l1    | 3937.95202 | 0.59071288 | 0.19497169 | 3.02973674 | 0.00244767 | 0.02825814 |
| Wdfy1       | 3048.4935  | 0.59041649 | 0.34574037 | 1.70768747 | 0.08769435 | 0.30833385 |
| Tsc22d1     | 20384.6219 | 0.58998379 | 0.1851721  | 3.18613767 | 0.00144186 | 0.01906663 |
| Ly96        | 50.9013587 | 0.589946   | 0.38502463 | 1.53222923 | 0.12546588 | 0.37863766 |
| Dmbt1       | 9.64321122 | 0.58994164 | 0.42235697 | 1.39678442 | 0.16247841 | 0.43388979 |
| Kcnd1       | 278.92486  | 0.58935009 | 0.32801073 | 1.7967403  | 0.07237686 | 0.27431941 |
| Dynlt1b     | 212.324303 | 0.58850581 | 0.30560371 | 1.92571556 | 0.0541399  | 0.23059991 |
| Eva1a       | 301.067792 | 0.58841422 | 0.378173   | 1.55593925 | 0.11972254 | 0.36825776 |
| Slc12a5     | 119.545379 | 0.58819578 | 0.34726231 | 1.69380829 | 0.09030172 | 0.31312835 |
| Casq1       | 54.6462001 | 0.58751716 | 0.42983725 | 1.36683632 | 0.17167661 | 0.4479452  |
| Smarca1     | 455.820639 | 0.58748937 | 0.21733395 | 2.70316421 | 0.00686828 | 0.05917376 |
| Itprp       | 242.545873 | 0.58732936 | 0.25983758 | 2.26037109 | 0.02379823 | 0.13819502 |
| Syt16       | 12.9367507 | 0.58595037 | 0.43226872 | 1.35552344 | 0.17525085 | 0.45309298 |
| Vstm2a      | 31.2777035 | 0.58567919 | 0.42612272 | 1.37443785 | 0.16930579 | 0.44438521 |
| Slc5a4a     | 5.73049467 | 0.58554599 | 0.40444983 | 1.44775926 | 0.14768439 | NA         |
| 1110065P20F | 909.661023 | 0.5851108  | 0.24278018 | 2.41004352 | 0.01595062 | 0.10575075 |
| Pdzd3       | 37.2444687 | 0.58509506 | 0.39149621 | 1.49451017 | 0.13504233 | 0.39257426 |
| Pik3ap1     | 17.2007442 | 0.58484602 | 0.4316306  | 1.35496884 | 0.17542748 | 0.45309298 |
| Etfdh       | 2622.20472 | 0.58484575 | 0.17971415 | 3.25431102 | 0.00113668 | 0.01605493 |
| Gm17801     | 5.06819691 | 0.58441703 | 0.40517059 | 1.44239747 | 0.14919028 | NA         |
| Myh7        | 34.0418242 | 0.5843896  | 0.40776789 | 1.43314275 | 0.15181705 | 0.418749   |
| Ust         | 317.20035  | 0.58432804 | 0.39082068 | 1.49513081 | 0.13488031 | 0.39242882 |
| Prss32      | 7.61544655 | 0.58413674 | 0.42088761 | 1.38786871 | 0.16517703 | 0.43856476 |
| Pi4k2a      | 5183.17939 | 0.58367454 | 0.17449891 | 3.3448606  | 0.00082324 | 0.0127639  |
| Mbnl2       | 2062.27893 | 0.5836398  | 0.23136506 | 2.52259268 | 0.01164932 | 0.08549252 |
| Alox12      | 478.257188 | 0.58346418 | 0.36329528 | 1.60603291 | 0.10826668 | 0.34760762 |
| Capn3       | 460.233375 | 0.58325631 | 0.28276611 | 2.06268106 | 0.03914294 | 0.18892361 |
| Olf1503     | 7.15512312 | 0.58307268 | 0.40137422 | 1.45269091 | 0.14630959 | 0.4103691  |
| Pou4f1      | 416.686467 | 0.58305243 | 0.2133316  | 2.73308053 | 0.0062745  | 0.05540871 |
| Qsox1       | 1038.62179 | 0.58299067 | 0.27795013 | 2.09746497 | 0.03595244 | 0.17992732 |
| Foxd2os     | 16.7656606 | 0.58293777 | 0.42646491 | 1.36690679 | 0.17165452 | 0.4479452  |
| Btbd17      | 14.0321044 | 0.58265085 | 0.43101488 | 1.35181147 | 0.17643563 | 0.45396269 |
| Mir3064     | 251.222678 | 0.5821598  | 0.26103167 | 2.23022665 | 0.0257324  | 0.14503971 |

|             |            |            |            |            |            |            |
|-------------|------------|------------|------------|------------|------------|------------|
| Gm13078     | 14.0248726 | 0.58202511 | 0.36327403 | 1.60216549 | NA         | NA         |
| Clnk        | 12.2940148 | 0.58197885 | 0.43146558 | 1.34884189 | 0.17738776 | 0.45490716 |
| Phyhipl     | 222.835335 | 0.58196588 | 0.27518307 | 2.11483172 | 0.03444429 | 0.1744198  |
| Mdga1       | 352.19106  | 0.58196337 | 0.38425251 | 1.51453366 | 0.12989054 | 0.38540886 |
| Gm10639     | 22.4732237 | 0.58151391 | 0.43097082 | 1.34931157 | 0.17723691 | 0.45473338 |
| Sgcd        | 35.2949227 | 0.58146487 | 0.43212821 | 1.34558416 | 0.17843666 | 0.45619849 |
| Tpo         | 20.2219838 | 0.58107737 | 0.42265076 | 1.37484047 | 0.16918091 | 0.44426415 |
| Gm44        | 42.7608214 | 0.5809745  | 0.42542966 | 1.36561824 | 0.17205882 | 0.44871485 |
| 2300009A05f | 162.615017 | 0.58066907 | 0.29429156 | 1.97310816 | 0.04848324 | 0.21554113 |
| Ankdd1b     | 4.79186123 | 0.58046754 | 0.37546036 | 1.54601552 | 0.12210082 | NA         |
| Pdlim3      | 12.4779648 | 0.58036553 | 0.4283987  | 1.35473225 | 0.17550288 | 0.45313719 |
| Barx1       | 39.4465993 | 0.58030793 | 0.41332205 | 1.40400911 | 0.16031614 | 0.43166    |
| Ccdc71l     | 457.724344 | 0.58011774 | 0.24973163 | 2.32296457 | 0.02018106 | 0.12475195 |
| Tmem185b    | 1764.92111 | 0.58009528 | 0.17025171 | 3.40728013 | 0.00065614 | 0.01074063 |
| Gm14057     | 112.422396 | 0.58008005 | 0.31673893 | 1.83141378 | 0.06703881 | 0.26304109 |
| Mgp         | 4.21404829 | 0.58006984 | 0.32577992 | 1.78055735 | NA         | NA         |
| Vill        | 484.306944 | 0.58003957 | 0.21987005 | 2.63810183 | 0.00833715 | 0.06834533 |
| Angptl6     | 356.833873 | 0.58000141 | 0.27805107 | 2.08595285 | 0.03698289 | 0.18247163 |
| Ksr2        | 68.3354605 | 0.57994678 | 0.35655493 | 1.62652859 | 0.10383726 | 0.33919327 |
| Trerf1      | 1070.47859 | 0.57978012 | 0.23945374 | 2.42126144 | 0.01546675 | 0.10349545 |
| Pnrc1       | 2883.71836 | 0.57920359 | 0.21971367 | 2.63617455 | 0.00838466 | 0.06862623 |
| 4732490B19f | 5.78084735 | 0.5791762  | 0.38999147 | 1.48509966 | 0.13751743 | NA         |
| Mical2      | 43.5104275 | 0.57901952 | 0.39106952 | 1.48060509 | 0.13871184 | 0.39807358 |
| Ttc36       | 3.95556782 | 0.57877244 | 0.38934275 | 1.48653708 | 0.13713712 | NA         |
| Ctsw        | 171.205184 | 0.57838221 | 0.30928023 | 1.87009111 | 0.06147117 | 0.2497226  |
| Plk3        | 907.737829 | 0.57830131 | 0.21295208 | 2.71564058 | 0.00661477 | 0.0576928  |
| Fam122a     | 395.374387 | 0.57807618 | 0.23444648 | 2.46570635 | 0.01367434 | 0.09541904 |
| Clnkb       | 665.234717 | 0.57801689 | 0.24439285 | 2.36511374 | 0.01802453 | 0.11537259 |
| Fbxo44      | 439.270633 | 0.57770556 | 0.32186015 | 1.79489616 | 0.07267025 | 0.27476678 |
| Gm6792      | 1505.26005 | 0.57761417 | 0.31491212 | 1.83420748 | 0.0666232  | 0.26182902 |
| Tmbim1      | 2587.09305 | 0.57756821 | 0.17586029 | 3.28424473 | 0.00102256 | 0.01480619 |
| Thbs1       | 125.115414 | 0.57732158 | 0.3478184  | 1.65983622 | NA         | NA         |
| Adra2a      | 16.8817489 | 0.57721583 | 0.42797415 | 1.34871658 | 0.17742802 | 0.45493538 |
| Lrrc1       | 1250.06973 | 0.57710095 | 0.17316155 | 3.33273149 | 0.00085998 | 0.01313707 |
| Saa2        | 74.5767122 | 0.5766501  | 0.40626628 | 1.4193895  | 0.15578549 | 0.4243942  |
| Erf         | 6979.29772 | 0.57626776 | 0.18935147 | 3.04337624 | 0.0023394  | 0.0273328  |
| Lrrc49      | 627.710458 | 0.57623557 | 0.23387678 | 2.46384255 | 0.01374565 | 0.09547055 |
| Al413582    | 468.566018 | 0.57590086 | 0.30859385 | 1.86620979 | 0.06201202 | 0.25096937 |
| Ociad2      | 537.634321 | 0.57561655 | 0.2294641  | 2.5085255  | 0.01212362 | 0.08801795 |
| Minos1      | 5848.35231 | 0.57561136 | 0.21004435 | 2.7404277  | 0.00613593 | 0.05452561 |
| Dzip1l      | 752.80992  | 0.5751531  | 0.25647333 | 2.24254544 | 0.02492614 | 0.14230045 |

|             |            |            |            |            |            |            |
|-------------|------------|------------|------------|------------|------------|------------|
| Rpl30       | 51.3577842 | 0.57486329 | 0.34175077 | 1.68211267 | 0.09254699 | 0.31679469 |
| Pcdhgb2     | 53.4640416 | 0.57481709 | 0.38588535 | 1.48960589 | 0.13632789 | 0.39420511 |
| Kif5c       | 1504.43627 | 0.57452968 | 0.17698104 | 3.24627821 | 0.00116925 | 0.01644026 |
| Gm19897     | 11.2543507 | 0.57452572 | 0.37842202 | 1.51821427 | 0.12896039 | 0.38379957 |
| 2300002M23  | 1607.93084 | 0.57442338 | 0.34758055 | 1.65263388 | 0.0984054  | 0.32810942 |
| Cd244       | 21.1947318 | 0.57374033 | 0.43091353 | 1.33145117 | 0.1830406  | 0.46313732 |
| Epx         | 71.0991357 | 0.5736666  | 0.38219023 | 1.50099756 | 0.13335619 | 0.39033562 |
| Fuca1       | 3752.26723 | 0.5732676  | 0.19304683 | 2.96957794 | 0.00298209 | 0.03269577 |
| Wscd1       | 271.264761 | 0.57294034 | 0.3860697  | 1.48403344 | 0.13780005 | 0.39657388 |
| A230072C01f | 237.226901 | 0.57285221 | 0.29078448 | 1.97002329 | 0.0488357  | 0.21621299 |
| Tmem200b    | 169.783347 | 0.57264136 | 0.38390202 | 1.49163412 | 0.13579509 | 0.39346924 |
| Cmtm3       | 767.606101 | 0.57178623 | 0.23061637 | 2.47938271 | 0.013161   | 0.09262695 |
| Mccc1os     | 8.75671476 | 0.57171987 | 0.41985537 | 1.36170668 | 0.17329047 | 0.45071973 |
| Hpdl        | 1147.42904 | 0.57170232 | 0.21502971 | 2.65871316 | 0.00784397 | 0.06551106 |
| Ccne1       | 10270.6139 | 0.57153396 | 0.21076099 | 2.7117635  | 0.00669263 | 0.05827387 |
| Gjd3        | 10.7204641 | 0.57124465 | 0.42493585 | 1.34430798 | 0.17884882 | 0.45692097 |
| Smox        | 1954.96293 | 0.57110779 | 0.22700937 | 2.51578949 | 0.01187661 | 0.08670295 |
| Fam159b     | 12.9722209 | 0.57028972 | 0.39705693 | 1.43629205 | NA         | NA         |
| Pgp         | 3017.27644 | 0.56978261 | 0.21044668 | 2.70749152 | 0.00677938 | 0.05866229 |
| Bscl2       | 2192.98212 | 0.5697197  | 0.2250929  | 2.53104253 | 0.01137241 | 0.08433585 |
| 1700028i16R | 39.8113522 | 0.56962502 | 0.4290031  | 1.32778765 | 0.18424827 | 0.4644599  |
| Pkib        | 8.05266272 | 0.56959165 | 0.41346826 | 1.3775946  | 0.16832849 | 0.44322322 |
| 1700113A16f | 68.6355253 | 0.56955338 | 0.3327641  | 1.71158302 | 0.08697354 | 0.30681806 |
| Gm1673      | 49.0526281 | 0.56939529 | 0.41635218 | 1.36758091 | 0.1714433  | 0.44778547 |
| 0610040F04F | 208.575608 | 0.56917615 | 0.38354305 | 1.48399546 | 0.13781012 | 0.39657388 |
| Rab31       | 2320.5808  | 0.56913551 | 0.26207397 | 2.17165983 | 0.02988133 | 0.15907484 |
| Hint3       | 600.26017  | 0.56909608 | 0.23797766 | 2.3913845  | 0.01678496 | 0.10967352 |
| Baz1a       | 4969.18963 | 0.56893974 | 0.27366296 | 2.07897971 | 0.03761922 | 0.18431519 |
| Gys1        | 6595.85352 | 0.56873006 | 0.25574939 | 2.22377874 | 0.02616333 | 0.14624947 |
| Kcnj14      | 18.1487933 | 0.56871088 | 0.43215487 | 1.31598861 | 0.18817787 | 0.46953088 |
| Fbxw4       | 515.28908  | 0.56862634 | 0.25341293 | 2.24387261 | 0.0248406  | 0.14201225 |
| Ppp3ca      | 2489.14437 | 0.56831979 | 0.26430202 | 2.15026657 | 0.03153413 | 0.16500059 |
| Abra        | 13.1867617 | 0.56822531 | 0.43173115 | 1.31615545 | 0.18812187 | 0.46950461 |
| Gpr156      | 10.0643673 | 0.56812215 | 0.42894898 | 1.32445158 | 0.18535311 | 0.46595793 |
| Plac1       | 7.84078337 | 0.5680976  | 0.40025614 | 1.41933515 | 0.15580133 | 0.4243942  |
| Tmem59      | 13201.415  | 0.56806679 | 0.23414481 | 2.42613447 | 0.01526061 | 0.10269053 |
| Otulin      | 1644.55605 | 0.5678713  | 0.17469334 | 3.25067515 | 0.00115131 | 0.01624689 |
| Ttc9b       | 102.687132 | 0.5678195  | 0.30604467 | 1.85534841 | 0.06354649 | 0.25483194 |
| Mt2         | 19423.7766 | 0.56772803 | 0.28548905 | 1.98861578 | 0.04674363 | 0.2102359  |
| Amhr2       | 564.334399 | 0.56765274 | 0.27221614 | 2.08530156 | 0.03704194 | 0.18252191 |
| Myh8        | 3.75224171 | 0.56753341 | 0.35236287 | 1.61065041 | 0.10725594 | NA         |

|             |            |            |            |            |            |            |
|-------------|------------|------------|------------|------------|------------|------------|
| Slc4a4      | 192.212123 | 0.56747593 | 0.42414884 | 1.33791698 | 0.1809235  | 0.45954106 |
| Cdc20b      | 23.5984158 | 0.56722139 | 0.40511643 | 1.40014412 | 0.16147017 | 0.43248752 |
| 1700111N16l | 7.90001858 | 0.56692295 | 0.40040786 | 1.41586367 | 0.15681542 | 0.42609701 |
| Rhoh        | 17.160658  | 0.5668542  | 0.4252591  | 1.33296196 | 0.18254429 | 0.46226123 |
| Strip2      | 998.865103 | 0.56670971 | 0.43221813 | 1.31116598 | 0.18980169 | 0.47143981 |
| Atad3aos    | 24.8948344 | 0.56644645 | 0.41739202 | 1.35710894 | 0.1747466  | 0.45238627 |
| Ctcf1       | 21.4081779 | 0.56626251 | 0.42416012 | 1.33502063 | 0.18186959 | 0.4610031  |
| Adad1       | 9.55558345 | 0.56612865 | 0.4038672  | 1.40176932 | 0.16098414 | 0.43209007 |
| Ltb4r2      | 56.7554717 | 0.56612348 | 0.37941395 | 1.49209979 | 0.13567299 | 0.39328705 |
| Sobp        | 261.882624 | 0.56563984 | 0.40377445 | 1.4008807  | 0.16124975 | 0.43227306 |
| Cul7        | 4755.99373 | 0.56557495 | 0.19343859 | 2.9237958  | 0.00345792 | 0.03613847 |
| Smtnl1      | 1380.26429 | 0.56525233 | 0.39418586 | 1.43397414 | 0.15157964 | 0.41871751 |
| 4930507D05l | 15.2164604 | 0.56517539 | 0.43131716 | 1.31034756 | 0.19007828 | 0.47176806 |
| Hyi         | 116.697321 | 0.56493276 | 0.33061419 | 1.70873719 | 0.08749964 | 0.30785998 |
| Pnmal1      | 15.2162809 | 0.5648944  | 0.431659   | 1.30865892 | 0.19064991 | 0.47277895 |
| Rimbp3      | 239.195718 | 0.56483435 | 0.302706   | 1.86595029 | 0.06204832 | 0.25096937 |
| Fam171a1    | 638.952719 | 0.56434078 | 0.27176819 | 2.076552   | 0.03784293 | 0.1850873  |
| Wnt3        | 31.4345378 | 0.5641816  | 0.42785379 | 1.31863177 | 0.18729225 | 0.46841134 |
| 1600029O15l | 3.77439662 | 0.56397284 | 0.37117005 | 1.51944599 | 0.12865027 | NA         |
| Sgsm3       | 2242.86677 | 0.5637594  | 0.19083559 | 2.95416277 | 0.00313519 | 0.0338344  |
| Dkk4        | 4.69090316 | 0.56237466 | 0.39457918 | 1.42525174 | 0.15408445 | NA         |
| Porcn       | 1015.01312 | 0.56230196 | 0.42750628 | 1.31530689 | 0.18840678 | 0.46953748 |
| 4930579G18l | 13.9333968 | 0.562158   | 0.43187201 | 1.3016773  | 0.19302672 | 0.47565108 |
| Zmat1       | 55.80454   | 0.56211333 | 0.40173965 | 1.39919803 | 0.16175361 | 0.43279944 |
| Amdhd2      | 2567.03013 | 0.56206691 | 0.21759264 | 2.58311548 | 0.00979125 | 0.07624627 |
| Sh3bp2      | 232.53766  | 0.56194488 | 0.247163   | 2.27358008 | 0.02299125 | 0.13522575 |
| Usp18       | 2.96067986 | 0.56182956 | 0.34101752 | 1.64750937 | 0.09945339 | NA         |
| Krt23       | 3.17139178 | 0.56168386 | 0.33952676 | 1.65431398 | 0.09806373 | NA         |
| Tnfrsf11a   | 72.1926577 | 0.56132409 | 0.38088314 | 1.4737436  | 0.14055064 | 0.40079365 |
| Cnm1        | 97.3892832 | 0.56117315 | 0.40612437 | 1.3817766  | 0.16704031 | 0.44162595 |
| Trmt12      | 466.929807 | 0.56115801 | 0.24118387 | 2.32668135 | 0.01998223 | 0.12390099 |
| Gm11544     | 25.8837237 | 0.56084246 | 0.43184463 | 1.29871353 | 0.19404226 | 0.47678166 |
| Sez6l2      | 54.780118  | 0.56079166 | 0.37046739 | 1.51374097 | 0.13009155 | 0.38573995 |
| Lpp         | 897.671822 | 0.56065186 | 0.31342841 | 1.78877167 | 0.0736516  | 0.27716036 |
| Aebp2       | 10805.0263 | 0.56062888 | 0.19419749 | 2.88690073 | 0.00389057 | 0.03923622 |
| Hoxc10      | 88.200232  | 0.5602648  | 0.29971769 | 1.86930845 | 0.06157991 | 0.24996848 |
| LOC1005047l | 90.9771366 | 0.56013574 | 0.33138848 | 1.69026918 | 0.09097647 | 0.31400004 |
| Kcne1l      | 3.92622847 | 0.56006033 | 0.37151234 | 1.50751474 | 0.13167877 | NA         |
| Scd3        | 244.698024 | 0.5600329  | 0.25294294 | 2.21406814 | 0.02682409 | 0.14850176 |
| Lphn2       | 899.74252  | 0.55999585 | 0.31214042 | 1.79405102 | 0.07280503 | 0.27513753 |
| Gas2l2      | 9.39599735 | 0.5597526  | 0.42540687 | 1.31580525 | 0.18823942 | 0.46953088 |

|             |            |            |            |            |            |            |
|-------------|------------|------------|------------|------------|------------|------------|
| Ankef1      | 8.02268641 | 0.55972585 | 0.4143224  | 1.35094275 | 0.17671377 | 0.45422741 |
| Agpat4      | 663.061451 | 0.5591559  | 0.22983808 | 2.43282537 | 0.01498152 | 0.10138281 |
| 4930467D21I | 11.1092558 | 0.55852611 | 0.41692892 | 1.33961951 | 0.18036908 | 0.45896455 |
| Polr2l      | 366.160229 | 0.55846377 | 0.25535989 | 2.18696744 | 0.0287449  | 0.15542836 |
| Mtnr1a      | 7.42437014 | 0.55821864 | 0.40357123 | 1.38319731 | 0.16660437 | 0.44114841 |
| Atp2a2      | 31800.5023 | 0.55798061 | 0.21617026 | 2.58120892 | 0.0098455  | 0.07662515 |
| Nlrp10      | 9.19488924 | 0.55794912 | 0.409455   | 1.36266285 | 0.17298879 | 0.45019458 |
| Nhsl2       | 293.01018  | 0.55794315 | 0.31532114 | 1.76944415 | 0.07681978 | 0.28450213 |
| Piezo2      | 25.5043546 | 0.55788703 | 0.43044535 | 1.29606936 | 0.19495159 | 0.47789096 |
| Dlec1       | 49.4289237 | 0.55765928 | 0.38348707 | 1.45418015 | 0.14589637 | 0.4096848  |
| D630033O11  | 10.7715978 | 0.55758914 | 0.42696877 | 1.3059249  | 0.1915781  | 0.47409787 |
| Gpr87       | 5.73245092 | 0.55720662 | 0.38503752 | 1.44714887 | 0.14785523 | NA         |
| Gmppb       | 1821.11525 | 0.55672875 | 0.21183793 | 2.62808817 | 0.00858663 | 0.06980168 |
| Spa17       | 102.479955 | 0.55667256 | 0.36961363 | 1.50609317 | 0.13204326 | 0.38852168 |
| Snrpn       | 12.4236347 | 0.55662043 | 0.43223493 | 1.28777289 | 0.19782503 | 0.48094783 |
| Fam26e      | 463.535906 | 0.55651855 | 0.23292182 | 2.38929338 | 0.01688082 | 0.10998951 |
| Frmpd3      | 5.10840413 | 0.55645464 | 0.38199157 | 1.45671967 | 0.14519378 | NA         |
| Nfkb2       | 1200.39924 | 0.55607474 | 0.22122685 | 2.51359515 | 0.01195075 | 0.08704739 |
| 7420426K07F | 3.95403623 | 0.55600244 | 0.34819686 | 1.59680488 | 0.11030921 | NA         |
| Il25        | 17.4752542 | 0.55572505 | 0.42850866 | 1.29688173 | 0.19467188 | 0.4775284  |
| Fbxo36      | 334.533383 | 0.55539252 | 0.27589598 | 2.01305043 | 0.04410932 | 0.20290225 |
| Rmrp        | 76.5657119 | 0.55535738 | 0.36494705 | 1.52174783 | 0.12807228 | 0.38211884 |
| Thbd        | 37.215071  | 0.55528316 | 0.39041983 | 1.42227194 | 0.15494732 | 0.42364842 |
| Rnf13       | 4013.92953 | 0.55522818 | 0.25869256 | 2.14628587 | 0.03185018 | 0.16615301 |
| BC031361    | 34.2693354 | 0.55484754 | 0.42312768 | 1.31130052 | 0.18975625 | 0.47143981 |
| B3gnt4      | 17.9419085 | 0.55474917 | 0.42732542 | 1.29818902 | 0.19422239 | 0.47688873 |
| Stat1       | 1532.50223 | 0.55460166 | 0.24411366 | 2.27189938 | 0.02309259 | 0.1357311  |
| Usp17le     | 53.6989729 | 0.55455734 | 0.42539819 | 1.30361941 | 0.19236338 | 0.4751259  |
| Slc25a34    | 113.854191 | 0.55454758 | 0.36751934 | 1.50889359 | 0.13132598 | 0.38745025 |
| Cd63        | 10293.5887 | 0.55438907 | 0.21992837 | 2.52077107 | 0.0117098  | 0.08585531 |
| Atp6v1a     | 29318.732  | 0.55434409 | 0.193081   | 2.87104417 | 0.00409118 | 0.04042058 |
| Mmp21       | 7.45582879 | 0.55432649 | 0.42095925 | 1.31681747 | 0.18789981 | 0.46932702 |
| Sh3gl3      | 1120.78793 | 0.553529   | 0.20438178 | 2.70830888 | 0.0067627  | 0.05862142 |
| Frat1       | 313.934454 | 0.55351399 | 0.32653941 | 1.69509091 | 0.09005818 | 0.31253583 |
| Tmem247     | 3.31430624 | 0.55333499 | 0.34037143 | 1.62567989 | 0.10401777 | NA         |
| Gmpr        | 690.1473   | 0.55318076 | 0.24099279 | 2.29542454 | 0.02170881 | 0.13039538 |
| lqsec2      | 342.264612 | 0.55305673 | 0.24716551 | 2.23759674 | 0.02524736 | 0.14341894 |
| Gm10714     | 4.27463677 | 0.55304006 | 0.39733928 | 1.39185852 | 0.16396524 | NA         |
| Adamts2     | 116.069387 | 0.55299652 | 0.40924996 | 1.35124393 | 0.17661731 | 0.45416588 |
| Dlgap2      | 30.7912803 | 0.5529448  | 0.39291804 | 1.40727772 | 0.15934505 | 0.43014212 |
| Gng11       | 3.15344786 | 0.55283612 | 0.33774609 | 1.63683943 | 0.10166402 | NA         |

|             |            |            |            |            |            |            |
|-------------|------------|------------|------------|------------|------------|------------|
| Lhx9        | 4.39621091 | 0.55280122 | 0.33337881 | 1.65817742 | 0.09728166 | NA         |
| Psmb8       | 8.89661148 | 0.551905   | 0.41194714 | 1.33974716 | 0.18032756 | 0.45896455 |
| Stx4a       | 2571.05024 | 0.55159342 | 0.22958916 | 2.40252377 | 0.01628238 | 0.10742776 |
| Slc2a9      | 66.2651994 | 0.55144282 | 0.42740244 | 1.29021916 | 0.19697458 | 0.48019308 |
| Ciart       | 500.881016 | 0.55144191 | 0.21721122 | 2.53873585 | 0.01112538 | 0.0830186  |
| Nov         | 12.6134628 | 0.55140635 | 0.42300707 | 1.30353932 | 0.1923907  | 0.4751259  |
| 4930502E18F | 234.738783 | 0.55126972 | 0.42223531 | 1.30559836 | 0.19168918 | 0.47424147 |
| Hspa4l      | 365.067568 | 0.55123336 | 0.31270578 | 1.76278594 | 0.0779366  | 0.28706586 |
| Sema5b      | 803.125414 | 0.5511658  | 0.26977526 | 2.04305544 | 0.04104695 | 0.19412676 |
| Gm16853     | 8.74311605 | 0.55104409 | 0.42722106 | 1.28983364 | 0.19710843 | 0.48021826 |
| Rinl        | 2635.77562 | 0.55099832 | 0.24281713 | 2.26919048 | 0.02325675 | 0.1362857  |
| Hrk         | 239.64631  | 0.55078294 | 0.35751801 | 1.54057396 | 0.12342051 | 0.37515879 |
| Adam1a      | 35.3526022 | 0.55075796 | 0.3935107  | 1.39960097 | 0.16163284 | 0.43260337 |
| Rab4a       | 2469.91191 | 0.55029663 | 0.25383596 | 2.16792225 | 0.0301646  | 0.15994852 |
| Camk4       | 16.7349433 | 0.55016558 | 0.43083467 | 1.27697611 | 0.20161068 | 0.48593424 |
| Adamts6     | 7.97653055 | 0.54971516 | 0.32628651 | 1.68476215 | 0.09203447 | 0.31594438 |
| Xrra1       | 19.1356236 | 0.54907439 | 0.43052663 | 1.27535524 | 0.20218353 | 0.48692251 |
| Slc51a      | 461.19563  | 0.54851115 | 0.25103439 | 2.18500405 | 0.02888855 | 0.15582582 |
| Vmn2r84     | 3.15994834 | 0.54828598 | 0.33660005 | 1.62889454 | 0.10333535 | NA         |
| 4732416N19I | 8.76164891 | 0.54827801 | 0.42515646 | 1.28959115 | 0.19719265 | 0.48031705 |
| 4931406H21I | 3.66086959 | 0.54825922 | 0.34897479 | 1.57105681 | 0.11616945 | NA         |
| Cisd3       | 2789.25061 | 0.54824713 | 0.27431194 | 1.99862656 | 0.04564877 | 0.20760832 |
| Ddr1        | 1322.7386  | 0.54821093 | 0.26701087 | 2.05314086 | 0.04005892 | 0.19132821 |
| Scx         | 11.5071637 | 0.54820372 | 0.42715141 | 1.28339437 | 0.19935394 | 0.48250548 |
| Cd97        | 6133.57888 | 0.54818525 | 0.35802731 | 1.5311269  | 0.12573803 | 0.37885621 |
| Faah        | 341.792008 | 0.54809725 | 0.28467678 | 1.9253318  | 0.05418786 | 0.23061725 |
| Rbm20       | 513.784343 | 0.54802641 | 0.37452404 | 1.46326099 | 0.14339598 | 0.40478324 |
| Acaa1b      | 125.336612 | 0.5479166  | 0.35512176 | 1.54289787 | 0.12285556 | 0.37409962 |
| Batf3       | 13.7752097 | 0.54760598 | 0.43031866 | 1.27255923 | 0.20317449 | 0.48758743 |
| Snap91      | 841.259029 | 0.54758577 | 0.22495543 | 2.43419676 | 0.01492488 | 0.10113151 |
| Pcdhga4     | 62.1838146 | 0.54748681 | 0.32895348 | 1.66432896 | 0.09604671 | 0.32385567 |
| Fabp6       | 8.89961014 | 0.5474499  | 0.42021859 | 1.30277411 | 0.19265189 | 0.47546891 |
| Ccdc38      | 148.520246 | 0.54738383 | 0.29401654 | 1.86174504 | 0.06263904 | 0.25248825 |
| B3galt6     | 614.201256 | 0.54716719 | 0.20335069 | 2.69075647 | 0.00712902 | 0.06088051 |
| Apob        | 33.0861587 | 0.54692937 | 0.42333831 | 1.29194395 | 0.19637656 | 0.47933634 |
| Olfml2b     | 42.5471409 | 0.54687156 | 0.43222651 | 1.26524297 | 0.20578424 | 0.49060786 |
| Ripply3     | 57.768939  | 0.54678491 | 0.40702381 | 1.34337328 | 0.17915113 | 0.45716759 |
| Nlrc3       | 46.4121927 | 0.54671615 | 0.39682862 | 1.37771348 | 0.16829177 | 0.44322322 |
| Hoxd4       | 75.4139788 | 0.5466846  | 0.37860534 | 1.44394319 | 0.14875496 | 0.41375216 |
| Rapgef5     | 536.797826 | 0.54639575 | 0.37820463 | 1.44470932 | 0.14853955 | 0.41357758 |
| Gba         | 2674.90591 | 0.54626474 | 0.18041617 | 3.02780367 | 0.00246338 | 0.02829249 |



|             |            |            |            |            |            |            |
|-------------|------------|------------|------------|------------|------------|------------|
| Btbd10      | 3304.82217 | 0.54588082 | 0.20052015 | 2.72232406 | 0.00648245 | 0.05669778 |
| Gm684       | 10.5674527 | 0.54585288 | 0.42853891 | 1.27375337 | 0.20275084 | 0.48733798 |
| Plagl1      | 12125.8492 | 0.54572531 | 0.28945503 | 1.88535437 | 0.05938201 | 0.24449289 |
| Gucy1b2     | 4.33523725 | 0.54566538 | 0.39290173 | 1.38880879 | 0.1648909  | NA         |
| Aifm2       | 1296.82135 | 0.54523719 | 0.24776762 | 2.2005991  | 0.02776442 | 0.15193025 |
| 5830428M24  | 2.81678077 | 0.54520475 | 0.32007834 | 1.70334784 | 0.08850299 | NA         |
| Crip2       | 1677.69144 | 0.54484192 | 0.21023949 | 2.59152992 | 0.00955502 | 0.07485651 |
| Gucy2g      | 23.0838581 | 0.54472665 | 0.42186823 | 1.29122463 | 0.1966258  | 0.47964357 |
| Spns1       | 6924.79265 | 0.54444155 | 0.23126872 | 2.35415129 | 0.01856505 | 0.11740754 |
| Spp1        | 104375.58  | 0.54439997 | 0.24598627 | 2.21313157 | 0.02688858 | 0.14875285 |
| Tifab       | 219.872299 | 0.54436689 | 0.40197437 | 1.35423281 | 0.17566211 | 0.45324731 |
| Evx1        | 22.0185091 | 0.54365807 | 0.43226748 | 1.25768903 | 0.20850424 | 0.49435119 |
| Trp53rk     | 210.856498 | 0.54348611 | 0.25150105 | 2.16096957 | 0.03069769 | 0.16176637 |
| BC080695    | 21.1270245 | 0.54340024 | 0.39056965 | 1.39130175 | NA         | NA         |
| 1700097N02I | 849.419813 | 0.54336118 | 0.21829702 | 2.48909114 | 0.01280701 | 0.09089998 |
| Myot        | 77.3821515 | 0.5432734  | 0.31885557 | 1.70382281 | 0.08841419 | 0.30966373 |
| Rnf217      | 211.685466 | 0.54289518 | 0.39822328 | 1.3632934  | 0.17279006 | 0.44986744 |
| H2-Q4       | 573.102596 | 0.54271524 | 0.31203893 | 1.7392549  | 0.08198994 | 0.29610439 |
| Grin2d      | 60.3856226 | 0.54220316 | 0.35032512 | 1.5477142  | 0.12169112 | 0.37157248 |
| C130074G19I | 3670.15773 | 0.54184277 | 0.2815435  | 1.9245437  | 0.05428647 | 0.23090918 |
| Mycbpap     | 5.39774373 | 0.5418296  | 0.39030782 | 1.388211   | 0.1650728  | NA         |
| Lrfn5       | 4.55066812 | 0.54180289 | 0.3739225  | 1.44897108 | 0.14734566 | NA         |
| Wnt16       | 7.24727205 | 0.54170087 | 0.4159848  | 1.30221314 | 0.19284353 | 0.47556451 |
| Speg        | 65.6723294 | 0.54163049 | 0.37396765 | 1.44833517 | 0.14752334 | 0.4121695  |
| A230070E04F | 103.7785   | 0.54159016 | 0.37625411 | 1.43942656 | 0.1500297  | 0.41610699 |
| Lonrf2      | 96.6381985 | 0.54137259 | 0.40064249 | 1.35126105 | 0.17661183 | 0.45416588 |
| A930001C03I | 69.3951304 | 0.54131602 | 0.34087591 | 1.58801491 | 0.11228297 | 0.3545406  |
| Phactr2     | 1541.60551 | 0.54109744 | 0.17182074 | 3.14919746 | 0.0016372  | 0.02090314 |
| F630042J09R | 94.3510645 | 0.54106819 | 0.30619072 | 1.76709533 | 0.07721226 | 0.28547977 |
| Crybg3      | 360.493363 | 0.54087099 | 0.30226813 | 1.78937483 | 0.07355447 | 0.27714546 |
| Angptl7     | 3.05072156 | 0.54053968 | 0.31880192 | 1.69553461 | 0.08997405 | NA         |
| Tagln3      | 539.54991  | 0.54043169 | 0.39743866 | 1.3597864  | 0.17389753 | 0.45108931 |
| Snx32       | 111.756502 | 0.54004573 | 0.34759127 | 1.55368034 | 0.12026068 | 0.36901616 |
| Trim7       | 519.422814 | 0.5399578  | 0.310592   | 1.73847942 | 0.08212637 | 0.29639063 |
| Dppa2       | 4655.55996 | 0.53987352 | 0.37829155 | 1.42713607 | 0.15354068 | 0.42141036 |
| Gstt3       | 588.274544 | 0.53972816 | 0.26831831 | 2.01152189 | 0.04427036 | 0.20344219 |
| Arl4d       | 635.59482  | 0.53941713 | 0.26445969 | 2.03969511 | 0.0413807  | 0.19532548 |
| Cndp1       | 23.5872093 | 0.53934301 | 0.4293089  | 1.25630523 | 0.20900533 | 0.49516588 |
| Wbscr17     | 94.3237438 | 0.53904308 | 0.42242976 | 1.27605376 | 0.20193651 | 0.48641802 |
| Adamts7     | 654.339486 | 0.53898436 | 0.27010553 | 1.99545845 | 0.0459929  | 0.20850713 |
| Tmem92      | 62.8741527 | 0.53870411 | 0.43083081 | 1.25038436 | 0.21115918 | 0.4978306  |

|             |            |            |            |            |            |            |
|-------------|------------|------------|------------|------------|------------|------------|
| Slc35d2     | 667.597158 | 0.53846585 | 0.37349313 | 1.44170218 | 0.14938641 | 0.41498893 |
| Lcmt2       | 785.653609 | 0.53844506 | 0.20887657 | 2.57781459 | 0.00994273 | 0.07718724 |
| Pm20d1      | 929.18115  | 0.53817919 | 0.23361844 | 2.30366744 | 0.02124132 | 0.12895942 |
| 5430417L22F | 686.450525 | 0.53816152 | 0.35494052 | 1.51620197 | 0.12946829 | 0.38455938 |
| 1700086O06l | 58.983101  | 0.53696511 | 0.3630946  | 1.47885733 | 0.13917845 | 0.39898766 |
| Gm14005     | 27.6867424 | 0.53647744 | 0.41449393 | 1.29429504 | 0.19556353 | 0.47847835 |
| Flnc        | 222.419749 | 0.53644206 | 0.3249445  | 1.65087289 | 0.09876453 | 0.32874299 |
| Ankrd1      | 4.15935406 | 0.53639408 | 0.3423598  | 1.56675543 | 0.11717187 | NA         |
| Mir1291     | 18.0871919 | 0.53619857 | 0.42639309 | 1.25752172 | 0.20856478 | 0.49441934 |
| Srms        | 10.9832147 | 0.53596281 | 0.43064885 | 1.24454716 | 0.21329825 | 0.5002449  |
| Mfsd7b      | 901.564978 | 0.53594917 | 0.23290405 | 2.30115867 | 0.02138266 | 0.12925061 |
| Fam227a     | 49.9335772 | 0.53590239 | 0.35551616 | 1.5073925  | 0.13171008 | 0.38821521 |
| Slamf9      | 39.6598006 | 0.53584245 | 0.42343614 | 1.26546224 | 0.20570567 | 0.49055804 |
| 4930577N17l | 20.1500989 | 0.53487485 | 0.42520114 | 1.2579337  | 0.20841574 | 0.49429207 |
| Ager        | 26.2856156 | 0.53475405 | 0.4222445  | 1.26645594 | 0.20534989 | 0.4903111  |
| Gm8909      | 1442.27349 | 0.53474956 | 0.38552185 | 1.38707975 | 0.16541745 | 0.43892642 |
| Nox4        | 278.738108 | 0.5343084  | 0.26843641 | 1.99044681 | 0.04654174 | 0.20987956 |
| Wif1        | 41.3009931 | 0.53422317 | 0.4075512  | 1.3108124  | 0.18992115 | 0.47164815 |
| Park2       | 15.6087281 | 0.53371262 | 0.43115375 | 1.23787075 | 0.21576399 | 0.50281353 |
| Gnb5        | 382.803599 | 0.53369594 | 0.25990199 | 2.05345076 | 0.04002888 | 0.19132821 |
| Pgc         | 1008.42171 | 0.53365422 | 0.20335129 | 2.62429713 | 0.0086828  | 0.07025298 |
| Myo6        | 2408.72342 | 0.53353469 | 0.24239241 | 2.20111965 | 0.02772755 | 0.15193025 |
| Ndufaf2     | 1917.50042 | 0.53308025 | 0.20931633 | 2.54676856 | 0.01087255 | 0.08148388 |
| Zbtb40      | 1569.94336 | 0.53258262 | 0.24392311 | 2.18340371 | 0.02900609 | 0.15618897 |
| Bmp2        | 17.1005857 | 0.53229101 | 0.43169657 | 1.23302117 | 0.21756787 | 0.50540791 |
| Oaz2        | 2025.60397 | 0.53221875 | 0.17987956 | 2.95875051 | 0.00308889 | 0.03342751 |
| Grem1       | 3.34136214 | 0.53179744 | 0.31662782 | 1.67956635 | 0.09304172 | NA         |
| Ptdss1      | 4950.19314 | 0.53171926 | 0.16894521 | 3.14728822 | 0.00164792 | 0.02100549 |
| A330009N23  | 75.2967744 | 0.53149642 | 0.38780992 | 1.37050754 | 0.17052852 | 0.44607049 |
| Gm5741      | 9.13188269 | 0.53148371 | 0.41303725 | 1.28676943 | 0.19817467 | 0.4811611  |
| Lat         | 381.805515 | 0.53138974 | 0.34501512 | 1.54019261 | 0.12351341 | 0.37529446 |
| Slc16a9     | 809.984716 | 0.53138265 | 0.38242718 | 1.38950024 | 0.16468069 | 0.43784397 |
| Akap3       | 6.50425992 | 0.53115672 | 0.41684167 | 1.27424094 | 0.20257804 | 0.487284   |
| Entpd6      | 2035.16929 | 0.53112142 | 0.16649865 | 3.18994422 | 0.001423   | 0.01892995 |
| Mir3535     | 33.534129  | 0.53099261 | 0.38164443 | 1.39132805 | 0.16412597 | 0.43696678 |
| 0610005C13f | 22.4867878 | 0.53076979 | 0.42524471 | 1.24815142 | 0.21197561 | 0.49862846 |
| Cpeb4       | 1491.88265 | 0.53074129 | 0.27956143 | 1.89847822 | 0.05763311 | 0.2392794  |
| Pqlc1       | 678.046374 | 0.53072    | 0.27373121 | 1.93883629 | 0.05252128 | 0.22668842 |
| Art1        | 55.8095258 | 0.5305099  | 0.40393998 | 1.31333844 | 0.18906893 | 0.47058434 |
| Tll1        | 87.449048  | 0.53028201 | 0.39615791 | 1.33856221 | 0.18071323 | 0.4593448  |
| Ssbp3       | 3038.34958 | 0.52996893 | 0.19868858 | 2.66733464 | 0.00764555 | 0.06417696 |

|             |            |            |            |            |            |            |
|-------------|------------|------------|------------|------------|------------|------------|
| Vstm5       | 203.015969 | 0.5298944  | 0.32857003 | 1.61272896 | 0.10680341 | 0.34479962 |
| Mreg        | 13637.6013 | 0.52983595 | 0.33197782 | 1.59599803 | 0.11048923 | 0.35123019 |
| Igsf21      | 62.0385912 | 0.52957383 | 0.37674435 | 1.40565833 | 0.15982561 | 0.43106542 |
| Fbxl15      | 242.088129 | 0.52919961 | 0.2652607  | 1.99501701 | 0.04604102 | 0.20853442 |
| Tpk1        | 1936.3418  | 0.52912462 | 0.22376311 | 2.36466416 | 0.01804643 | 0.1154422  |
| Epsti1      | 4.07114768 | 0.52908953 | 0.37327782 | 1.41741486 | 0.15636167 | NA         |
| Ptgis       | 1055.57134 | 0.52901748 | 0.22964945 | 2.303587   | 0.02124584 | 0.12895942 |
| Ripk1       | 1610.31784 | 0.52900042 | 0.20362175 | 2.59795634 | 0.00937804 | 0.0738794  |
| Spry2       | 3099.96518 | 0.52856132 | 0.25053598 | 2.10972222 | 0.03488229 | 0.17612158 |
| Mcemp1      | 6.03230325 | 0.52842981 | 0.35967119 | 1.46920251 | 0.14177787 | 0.4024804  |
| B3gat3      | 1949.67483 | 0.52810832 | 0.21184587 | 2.4928894  | 0.01267083 | 0.09038692 |
| Fam189a1    | 73.624131  | 0.52766763 | 0.33742799 | 1.56379333 | 0.11786611 | 0.36454572 |
| Pcsk1       | 483.603203 | 0.52765483 | 0.31748294 | 1.66199427 | 0.09651392 | 0.32451633 |
| Vwa5b2      | 35.3005792 | 0.52730441 | 0.37790223 | 1.39534613 | 0.16291149 | 0.43462627 |
| H13         | 1618.13321 | 0.52724267 | 0.17291763 | 3.04909726 | 0.0022953  | 0.02700504 |
| Naip5       | 23.1537785 | 0.52716345 | 0.42864648 | 1.22983269 | 0.21875976 | 0.50706041 |
| Pbxip1      | 2234.65389 | 0.5269522  | 0.20014208 | 2.63289066 | 0.00846616 | 0.06908658 |
| Zswim8      | 1529.98838 | 0.52666764 | 0.2516854  | 2.09256331 | 0.03638815 | 0.18092748 |
| Trim69      | 3.8207491  | 0.52656831 | 0.34954141 | 1.50645471 | 0.13195049 | NA         |
| A930007I19R | 15.6571179 | 0.52655359 | 0.42967249 | 1.22547662 | 0.22039569 | 0.50895393 |
| Clca2       | 11.5995103 | 0.52650264 | 0.41294838 | 1.27498416 | 0.20231485 | 0.4869577  |
| Il7         | 25.4087829 | 0.52648998 | 0.43000371 | 1.22438473 | 0.22080713 | 0.50898556 |
| Smarca5-ps  | 343.400046 | 0.52644456 | 0.33823614 | 1.55644091 | 0.11960328 | 0.36801556 |
| Tnnt2       | 187.894965 | 0.52641452 | 0.35949175 | 1.4643299  | 0.14310383 | 0.40432552 |
| Fgf1        | 22.2854369 | 0.5262719  | 0.43172239 | 1.21900534 | 0.22284217 | 0.51187866 |
| Tie1        | 33.0853434 | 0.52626551 | 0.42476329 | 1.23896184 | 0.21535963 | 0.5026351  |
| Sgms2       | 165.655947 | 0.52609954 | 0.40165785 | 1.30982014 | 0.19025669 | 0.47210495 |
| Wisp2       | 5.50875794 | 0.52579983 | 0.39384066 | 1.33505725 | 0.18185761 | NA         |
| Usp50       | 131.177699 | 0.52573868 | 0.30399978 | 1.72940482 | 0.08373667 | 0.29969826 |
| Igdcc3      | 1019.33841 | 0.52573424 | 0.27201519 | 1.93273855 | 0.05326841 | 0.22884208 |
| Thsd1       | 214.626708 | 0.52560383 | 0.34341912 | 1.53050253 | 0.12589239 | 0.37885621 |
| Bicc1       | 247.105013 | 0.52555364 | 0.4055288  | 1.29597118 | 0.19498541 | 0.47789096 |
| Cd209d      | 8.13427565 | 0.52532024 | 0.38131211 | 1.3776647  | NA         | NA         |
| D830031N03  | 414.807519 | 0.52529429 | 0.37237661 | 1.41065326 | 0.15834688 | 0.42858888 |
| Arrdc3      | 5631.45252 | 0.52515823 | 0.23900216 | 2.19729492 | 0.02799939 | 0.15293942 |
| Inhbb       | 821.592225 | 0.52511978 | 0.41991591 | 1.25053559 | 0.21110396 | 0.49780377 |
| Ttyh3       | 888.441063 | 0.52497229 | 0.20319449 | 2.58359508 | 0.00977765 | 0.07617848 |
| Wfdc2       | 5730.27494 | 0.52494243 | 0.26779037 | 1.96027371 | 0.04996381 | 0.21956082 |
| Gfpt1       | 4965.91781 | 0.52488562 | 0.19773819 | 2.65444745 | 0.00794384 | 0.06609667 |
| Dnajb13     | 556.059307 | 0.52445891 | 0.3939584  | 1.33125454 | 0.18310527 | 0.46315388 |
| Klhdc7a     | 2062.05544 | 0.52410299 | 0.34242798 | 1.53054955 | 0.12588076 | 0.37885621 |

|             |            |            |            |            |            |            |
|-------------|------------|------------|------------|------------|------------|------------|
| Avpi1       | 4341.99947 | 0.52397285 | 0.26198806 | 1.99998752 | 0.04550161 | 0.20714156 |
| Zic1        | 5.5685778  | 0.52388441 | 0.4101142  | 1.27741103 | 0.20145717 | NA         |
| Spin2c      | 90.6673733 | 0.52362274 | 0.30046952 | 1.74268175 | 0.08138922 | 0.29480621 |
| Neat1       | 5282.78509 | 0.52327838 | 0.29486081 | 1.77466234 | 0.07595366 | 0.2823029  |
| BB283400    | 28.8580093 | 0.52305952 | 0.41520935 | 1.2597489  | 0.20775996 | 0.49332568 |
| Pls1        | 620.67848  | 0.5229391  | 0.25612686 | 2.04171908 | 0.0411794  | 0.19458551 |
| 3110021A11f | 9.89836692 | 0.52237056 | 0.42666026 | 1.22432438 | 0.22082988 | 0.50898556 |
| Zmiz1       | 3863.29056 | 0.52217039 | 0.429487   | 1.21580023 | 0.22406103 | 0.51323805 |
| Ly9         | 5.00457802 | 0.52209168 | 0.39765883 | 1.31291356 | 0.18921208 | NA         |
| Slc5a4b     | 68.8354348 | 0.52193361 | 0.38590019 | 1.35250934 | 0.17621243 | 0.45380054 |
| Hspa5       | 49846.0693 | 0.52193051 | 0.2295587  | 2.27362551 | 0.02298851 | 0.13522575 |
| Tcta        | 369.428505 | 0.52181336 | 0.22931331 | 2.27554767 | 0.0228731  | 0.13501598 |
| A330041J22R | 16.1508576 | 0.52169792 | 0.42365771 | 1.23141373 | 0.21816817 | 0.50622697 |
| Cuzd1       | 5.71990768 | 0.52166737 | 0.40841282 | 1.27730408 | 0.20149491 | NA         |
| Fam19a5     | 178.728437 | 0.52097358 | 0.41708518 | 1.24908198 | 0.21163509 | 0.49812885 |
| Myo1f       | 1852.89514 | 0.52095333 | 0.39263274 | 1.32682091 | 0.18456793 | 0.46455672 |
| E130309D14f | 330.898142 | 0.52045295 | 0.33164852 | 1.56929076 | 0.1165802  | 0.36251525 |
| 1190007I07R | 1001.41672 | 0.52037607 | 0.23839195 | 2.18285929 | 0.02904617 | 0.15629656 |
| Tceal5      | 41.0255356 | 0.52037023 | 0.40343457 | 1.28985037 | 0.19710262 | 0.48021826 |
| Eng         | 4340.85996 | 0.52016617 | 0.21549189 | 2.413855   | 0.01578474 | 0.10521583 |
| Abca13      | 65.5862737 | 0.52010112 | 0.40424493 | 1.28659901 | 0.19823409 | 0.48122491 |
| Prkag2      | 1622.81781 | 0.52005648 | 0.20163489 | 2.57919881 | 0.00990298 | 0.07692368 |
| Ptpn14      | 2860.27257 | 0.51995661 | 0.35991501 | 1.44466497 | 0.14855202 | 0.41357758 |
| Psd         | 68.8393626 | 0.51978248 | 0.34068537 | 1.52569651 | 0.12708546 | 0.38086453 |
| Gdpd5       | 111.087974 | 0.51952378 | 0.3368899  | 1.54211741 | 0.12304507 | 0.37447602 |
| Fxn         | 547.939141 | 0.51949604 | 0.28348834 | 1.83251288 | 0.06687504 | 0.26268598 |
| Reg2        | 33.5373726 | 0.51947365 | 0.42294074 | 1.22824218 | 0.21935607 | 0.50777109 |
| Wdtdc1      | 11922.4468 | 0.51934562 | 0.16921341 | 3.0691752  | 0.00214651 | 0.02567717 |
| Lmx1a       | 25.5878261 | 0.51932151 | 0.42952579 | 1.2090578  | 0.22664064 | 0.51686297 |
| Hoxd10      | 24.7665902 | 0.51930046 | 0.42839151 | 1.21220998 | 0.22543201 | 0.51493731 |
| Trex1       | 394.785343 | 0.51915627 | 0.24305804 | 2.13593544 | 0.03268468 | 0.16880751 |
| Actn3       | 1404.50388 | 0.51878518 | 0.35260318 | 1.47130036 | 0.14120991 | 0.40171844 |
| Celsr2      | 629.206461 | 0.51869897 | 0.27297311 | 1.90018336 | 0.05740906 | 0.23881336 |
| Fam26f      | 92.4755053 | 0.51869372 | 0.35804669 | 1.4486762  | 0.14742803 | 0.41204462 |
| Pla2g10     | 647.921458 | 0.51865919 | 0.31946275 | 1.62353574 | 0.10447493 | 0.3398475  |
| Itm2c       | 2770.31558 | 0.51857651 | 0.20803577 | 2.49272763 | 0.0126766  | 0.09038692 |
| Hs6st2      | 25.9778278 | 0.51847006 | 0.42205542 | 1.22844071 | 0.21928157 | 0.50770735 |
| Idnk        | 678.118572 | 0.51841802 | 0.26094795 | 1.98667212 | 0.04695874 | 0.21087364 |
| 6030443J06R | 89.1113005 | 0.51820345 | 0.41472008 | 1.24952582 | 0.21147281 | 0.49812885 |
| Krt10       | 164.615225 | 0.51780018 | 0.25437007 | 2.03561754 | 0.04178878 | 0.19615371 |
| Dhrs3       | 375.642756 | 0.51775566 | 0.38806655 | 1.33419296 | 0.18214062 | 0.46138929 |

|             |            |            |            |            |            |            |
|-------------|------------|------------|------------|------------|------------|------------|
| 1700128A07F | 4.93052034 | 0.5175988  | 0.3938853  | 1.31408509 | 0.18881757 | NA         |
| Ldhal6b     | 468.269582 | 0.5173269  | 0.29233538 | 1.76963495 | 0.07678797 | 0.28448265 |
| Amz1        | 69.3845752 | 0.51721529 | 0.32729624 | 1.58026652 | 0.11404584 | 0.35801802 |
| Atp6v0b     | 6128.50923 | 0.51707994 | 0.20210609 | 2.55845794 | 0.01051375 | 0.07998991 |
| Pdpn        | 1446.90122 | 0.51692987 | 0.33735479 | 1.53230334 | 0.1254476  | 0.37863766 |
| Ppil6       | 47.5958154 | 0.51667864 | 0.39652198 | 1.30302649 | 0.19256572 | 0.47533167 |
| Wrap53      | 2524.66836 | 0.5164431  | 0.17107498 | 3.01881142 | 0.00253768 | 0.02886871 |
| Adra1d      | 12.9037465 | 0.51634336 | 0.41653446 | 1.23961739 | 0.21511695 | 0.50244572 |
| Adora2a     | 32.9073153 | 0.51607302 | 0.43147825 | 1.19605802 | 0.23167392 | 0.52302118 |
| Zbtb2       | 1237.78826 | 0.51589623 | 0.21592397 | 2.38924944 | 0.01688284 | 0.10998951 |
| Rtn4rl1     | 461.050732 | 0.51584739 | 0.34572674 | 1.49206682 | 0.13568163 | 0.39328705 |
| Gsto2       | 12.8011113 | 0.51534802 | 0.43225836 | 1.1922222  | 0.23317413 | 0.5247835  |
| Camk1       | 809.591191 | 0.51514451 | 0.28267508 | 1.82239098 | 0.06839568 | 0.26583885 |
| 1700120C14F | 25.0918326 | 0.51430855 | 0.43183336 | 1.19098845 | 0.23365812 | 0.52524103 |
| Uckl1os     | 4.47170509 | 0.5142761  | 0.37347284 | 1.37701069 | 0.16850894 | NA         |
| Smim4       | 289.146586 | 0.51391434 | 0.25032732 | 2.05296944 | 0.04007554 | 0.19134625 |
| 3110056K07F | 219.694182 | 0.51372511 | 0.28053214 | 1.83125225 | 0.0670629  | 0.26304109 |
| Cited4      | 195.786725 | 0.51350659 | 0.37562787 | 1.36706202 | 0.17160587 | 0.4479452  |
| Rhbdd2      | 1403.24185 | 0.5134092  | 0.18607109 | 2.75920999 | 0.00579413 | 0.05256972 |
| Krt20       | 7.35313185 | 0.51335212 | 0.39568571 | 1.29737341 | 0.19450274 | 0.47730978 |
| Gm4598      | 14.727572  | 0.51320191 | 0.42861072 | 1.19736137 | 0.23116573 | 0.52281662 |
| Ube2r2      | 6182.39133 | 0.51313009 | 0.21159173 | 2.42509528 | 0.01530437 | 0.10285145 |
| Adcy4       | 14.8362425 | 0.51303121 | 0.43165199 | 1.1885297  | 0.23462478 | 0.5263048  |
| Mzf1        | 85.7049646 | 0.51297393 | 0.31969688 | 1.60456348 | 0.1085899  | 0.34811431 |
| Gm10516     | 14.2491818 | 0.5129092  | 0.42808445 | 1.19814958 | 0.23085879 | 0.52255843 |
| Lhx8        | 9.35789439 | 0.51274055 | 0.42854914 | 1.19645684 | 0.23151833 | 0.52302118 |
| Ltbr        | 252.296912 | 0.51271992 | 0.27262404 | 1.88068493 | 0.06001479 | 0.24638068 |
| Tmem86b     | 68.6470557 | 0.51250781 | 0.32713334 | 1.56666333 | 0.11719341 | 0.36362993 |
| Ftx         | 274.739035 | 0.51239394 | 0.32739761 | 1.56505095 | 0.11757096 | 0.36406732 |
| Hmox1       | 5309.78066 | 0.51225866 | 0.19055783 | 2.68820575 | 0.00718371 | 0.06118588 |
| Micu2       | 924.302952 | 0.51223045 | 0.26197221 | 1.95528544 | 0.05054939 | 0.22106118 |
| 1700011E24F | 4.53235407 | 0.51211504 | 0.39565781 | 1.29433823 | 0.19554862 | NA         |
| Dlg4        | 75.5616416 | 0.51201626 | 0.39311373 | 1.30246343 | 0.19275801 | 0.47556451 |
| Phf11a      | 7.14324769 | 0.51184393 | 0.41523156 | 1.23267104 | 0.21769852 | 0.50558986 |
| Kif19a      | 99.2474752 | 0.51181228 | 0.4133899  | 1.23808606 | 0.21568415 | 0.5027617  |
| Rasl10a     | 321.02968  | 0.51173078 | 0.33966584 | 1.50657122 | 0.1319206  | 0.38843399 |
| Ephb2       | 1070.20357 | 0.51156756 | 0.38672628 | 1.3228156  | 0.18589671 | 0.46656448 |
| Syt6        | 4.85790362 | 0.51140645 | 0.39229492 | 1.30362749 | 0.19236062 | NA         |
| AI507597    | 3.52721831 | 0.51124116 | 0.34188642 | 1.49535382 | 0.13482213 | NA         |
| Wdpcp       | 191.840088 | 0.51121354 | 0.29536378 | 1.73079293 | 0.0834887  | 0.29916365 |
| lft27       | 773.768547 | 0.5111608  | 0.19906501 | 2.56780835 | 0.01023437 | 0.07875048 |

|             |            |            |            |            |            |            |
|-------------|------------|------------|------------|------------|------------|------------|
| Myd88       | 806.933679 | 0.51094269 | 0.28408043 | 1.79858465 | 0.07208441 | 0.27374472 |
| Ptafr       | 8.03811148 | 0.5109413  | 0.42723804 | 1.19591716 | 0.23172889 | 0.52302118 |
| Mir7650     | 40.4817126 | 0.5108483  | 0.42671793 | 1.19715688 | 0.23124541 | 0.52284057 |
| Acot8       | 1298.73836 | 0.51065686 | 0.23143991 | 2.20643391 | 0.02735363 | 0.1505757  |
| Chrna9      | 76.0648508 | 0.51059896 | 0.32506695 | 1.57075015 | 0.1162407  | 0.36215582 |
| Gm9573      | 2.95498205 | 0.51052545 | 0.35312361 | 1.44574149 | 0.14824972 | NA         |
| Trpm3       | 24.4517329 | 0.51007422 | 0.42983169 | 1.1866836  | 0.23535245 | 0.52722067 |
| Ankrd2      | 2.62038033 | 0.5099636  | 0.31264801 | 1.63111094 | 0.10286691 | NA         |
| Cystm1      | 963.746937 | 0.50974637 | 0.26384879 | 1.93196402 | 0.05336395 | 0.22892063 |
| Wdr52       | 16.0477378 | 0.50973833 | 0.42601111 | 1.19653765 | 0.23148682 | 0.52302118 |
| Nlr1        | 614.881224 | 0.50963939 | 0.39021823 | 1.30603685 | 0.19154002 | 0.47409787 |
| Dnajc1      | 1249.13503 | 0.50955007 | 0.20407563 | 2.49686882 | 0.01252953 | 0.08979111 |
| Kcnj10      | 96.9807942 | 0.50954297 | 0.28846795 | 1.76637633 | 0.07733273 | 0.28561324 |
| Col2a1      | 194.206748 | 0.50898842 | 0.31497203 | 1.61597974 | 0.10609869 | 0.34316572 |
| Ift22       | 605.987339 | 0.50895227 | 0.23650939 | 2.15193264 | 0.03140266 | 0.16442517 |
| Xlr5a       | 634.410109 | 0.50873036 | 0.40233306 | 1.26445082 | 0.20606826 | 0.49097098 |
| Gsc         | 439.425958 | 0.50847781 | 0.32585696 | 1.56043256 | 0.11865769 | 0.36626554 |
| Mapk12      | 317.753528 | 0.50825398 | 0.33494453 | 1.51742732 | 0.12915883 | 0.3841907  |
| Dcc         | 15.8463804 | 0.50804856 | 0.39847642 | 1.27497772 | 0.20231713 | 0.4869577  |
| Col28a1     | 3.29050153 | 0.5078127  | 0.36888269 | 1.3766238  | 0.16862859 | NA         |
| Sema5a      | 912.505413 | 0.5076912  | 0.40081519 | 1.26664659 | 0.20528169 | 0.4903111  |
| Ptpn12      | 3621.06582 | 0.50764969 | 0.20555636 | 2.46963753 | 0.013525   | 0.09474203 |
| Sh3tc2      | 521.422911 | 0.50730622 | 0.38536112 | 1.31644372 | 0.18802516 | 0.46937977 |
| Atn1        | 3007.01598 | 0.50716693 | 0.24682    | 2.05480484 | 0.03989786 | 0.19102574 |
| 2610018G03I | 450.184601 | 0.50704074 | 0.32368875 | 1.56644533 | 0.1172444  | 0.36363535 |
| Mir143hg    | 4.82473724 | 0.50689636 | 0.39667831 | 1.27785249 | 0.20130144 | NA         |
| Rtp3        | 22.0659288 | 0.50658086 | 0.41940074 | 1.20786831 | 0.22709792 | 0.51714743 |
| Tysnd1      | 1762.82686 | 0.50656516 | 0.24495018 | 2.06803338 | 0.03863688 | 0.18764984 |
| Lmo2        | 100.997864 | 0.50638052 | 0.43115891 | 1.17446378 | 0.24020931 | 0.53234929 |
| A730017C20I | 16.696332  | 0.50631629 | 0.42929829 | 1.17940441 | 0.23823718 | 0.53019122 |
| Pyroxd2     | 30.0145476 | 0.50621581 | 0.42953196 | 1.17852885 | 0.23858584 | 0.53071461 |
| Sfn         | 1418.86169 | 0.50610278 | 0.36871829 | 1.37260014 | 0.16987669 | 0.44511837 |
| Afmid       | 681.481445 | 0.50589473 | 0.21698509 | 2.33147229 | 0.01972847 | 0.12261467 |
| 5830454E08F | 19.4951116 | 0.50570438 | 0.42329269 | 1.19469199 | 0.23220739 | 0.52387309 |
| Ltbp2       | 79.0204699 | 0.50567025 | 0.32303083 | 1.56539318 | 0.11749075 | 0.36401527 |
| Prokr2      | 2.99676888 | 0.50566447 | 0.35368292 | 1.42971133 | 0.15279989 | NA         |
| Tnnc2       | 20.216856  | 0.50562164 | 0.43156204 | 1.17160824 | 0.24135438 | 0.53389786 |
| Col1a2      | 88.787085  | 0.50546781 | 0.3227133  | 1.5663061  | NA         | NA         |
| Zkscan7     | 190.140436 | 0.50542765 | 0.32313132 | 1.56415559 | 0.11778103 | 0.36435506 |
| Fam229a     | 6.60504856 | 0.50537244 | 0.40113694 | 1.25985016 | 0.20772342 | 0.49332568 |
| Gpc6        | 326.651667 | 0.50536583 | 0.30451417 | 1.65958067 | 0.09699884 | 0.32551337 |

|             |            |            |            |            |            |            |
|-------------|------------|------------|------------|------------|------------|------------|
| Plscr2      | 27.7691082 | 0.50528452 | 0.41813862 | 1.2084139  | 0.2268881  | 0.51708161 |
| Mafb        | 10.0362736 | 0.50516963 | 0.42897363 | 1.17762396 | 0.23894655 | 0.53094189 |
| Crygb       | 4.95822555 | 0.50474849 | 0.40633246 | 1.24220566 | 0.21416069 | NA         |
| Nkx2-5      | 24.3825055 | 0.50463348 | 0.43100553 | 1.17082834 | 0.24166779 | 0.53421167 |
| Arih2       | 16506.4542 | 0.50457724 | 0.17877446 | 2.82242351 | 0.00476622 | 0.04544419 |
| Usp44       | 815.01675  | 0.50455729 | 0.26356721 | 1.91434017 | 0.0555767  | 0.23466558 |
| Tbx4        | 81.7160406 | 0.50454744 | 0.39101966 | 1.2903378  | 0.1969334  | 0.48016797 |
| Oxt         | 4.90502416 | 0.50441563 | 0.35423315 | 1.42396509 | 0.15445658 | NA         |
| Gpr135      | 98.6501924 | 0.50425547 | 0.37919479 | 1.32980591 | 0.18358223 | 0.46376482 |
| Gm2694      | 311.058791 | 0.50405172 | 0.35839459 | 1.40641556 | 0.15960076 | 0.43063997 |
| Hoxa4       | 20.2031287 | 0.50399358 | 0.42445807 | 1.1873813  | 0.23507725 | 0.52698453 |
| Cyp4f14     | 38.7905629 | 0.50386291 | 0.38035506 | 1.32471725 | 0.18526495 | 0.46588862 |
| Nrn1l       | 42.5655915 | 0.50384388 | 0.38044233 | 1.32436335 | 0.1853824  | 0.46595793 |
| Tmem123     | 5625.40633 | 0.5034199  | 0.19910079 | 2.5284677  | 0.01145616 | 0.08472551 |
| Klhl40      | 8.5730565  | 0.50327619 | 0.39338196 | 1.27935758 | 0.20077116 | 0.48451154 |
| Mfhas1      | 203.188049 | 0.50316022 | 0.3701241  | 1.3594365  | 0.17400831 | 0.45122615 |
| 2010109A12f | 2.34757454 | 0.50315766 | 0.31152919 | 1.61512206 | 0.10628426 | NA         |
| Gas2l1      | 2190.92662 | 0.50311468 | 0.26671185 | 1.88636048 | 0.05924639 | 0.24413488 |
| Sox21       | 823.561278 | 0.50277585 | 0.23206493 | 2.16653095 | 0.03027064 | 0.16033334 |
| Rgs19       | 1495.78466 | 0.502591   | 0.16537993 | 3.03900837 | 0.00237358 | 0.02762843 |
| Bnc1        | 5.58393523 | 0.50249023 | 0.38418899 | 1.30792457 | 0.19089889 | NA         |
| Tagln2      | 10908.5546 | 0.50248226 | 0.20096816 | 2.50030777 | 0.01240855 | 0.08917065 |
| Fbxo9       | 1125.22622 | 0.50240878 | 0.1915231  | 2.62322816 | 0.00871009 | 0.07036397 |
| Tnfrsf10b   | 3693.1402  | 0.50228752 | 0.21816456 | 2.30233322 | 0.02131639 | 0.12914425 |
| Gm5577      | 88.2588397 | 0.50215464 | 0.37163884 | 1.35118988 | 0.17663461 | 0.45416588 |
| 4933425L06F | 2.33502471 | 0.50206409 | 0.31129619 | 1.61281796 | 0.10678406 | NA         |
| Slc4a8      | 2799.0838  | 0.50193644 | 0.2842816  | 1.76563111 | 0.07745776 | 0.28570816 |
| Kctd15      | 918.507784 | 0.50193092 | 0.29334502 | 1.71105998 | 0.08707004 | 0.30689624 |
| Sepn1       | 278.573595 | 0.50167239 | 0.35255186 | 1.42297473 | 0.15474348 | 0.42329215 |
| Fam57a      | 252.643271 | 0.50164833 | 0.29703807 | 1.68883516 | 0.09125102 | 0.31450458 |
| Rhbdl1      | 71.989559  | 0.50124905 | 0.33243947 | 1.50779045 | 0.13160817 | 0.38798836 |
| Pkhd1l1     | 18.4399862 | 0.50109498 | 0.34585674 | 1.44885127 | NA         | NA         |
| Phf7        | 288.9144   | 0.50103635 | 0.23133952 | 2.16580527 | 0.03032607 | 0.16046299 |
| Pglyrp2     | 2.32071323 | 0.5009188  | 0.31105307 | 1.61039659 | 0.1073113  | NA         |
| App         | 1112.71784 | 0.50061278 | 0.37082853 | 1.34998453 | 0.17702095 | 0.45462566 |
| C130026l21R | 4.09077958 | 0.50048701 | 0.34884033 | 1.4347166  | 0.15136787 | NA         |
| Al464131    | 2867.82658 | 0.50022304 | 0.20128697 | 2.48512381 | 0.01295064 | 0.0917101  |
| 2700054A10f | 207.57064  | 0.50017674 | 0.39116171 | 1.27869555 | 0.20100429 | 0.48477321 |
| Dzip1       | 2497.53688 | 0.50008043 | 0.21169331 | 2.3622874  | 0.01816256 | 0.11599421 |
| Mlxipl      | 1397.98072 | 0.49989497 | 0.32207525 | 1.55210614 | 0.12063683 | 0.36940975 |
| Gadd45b     | 1772.17685 | 0.49969468 | 0.3352691  | 1.49042867 | 0.13611156 | 0.39394581 |

|             |            |            |            |            |            |            |
|-------------|------------|------------|------------|------------|------------|------------|
| Zfp592      | 3014.16229 | 0.49969177 | 0.18734224 | 2.66726695 | 0.00764709 | 0.06417696 |
| Soga3       | 41.4454308 | 0.49938145 | 0.42304459 | 1.18044637 | 0.23782273 | 0.52993576 |
| 1810024B03F | 8.79898498 | 0.49935788 | 0.42978205 | 1.1618863  | 0.24528165 | 0.53806954 |
| 9530082P21F | 68.8565692 | 0.49925192 | 0.40237683 | 1.24075713 | 0.21469548 | 0.50176277 |
| Cnm2        | 2215.13566 | 0.49902794 | 0.23371031 | 2.13524144 | 0.03274129 | 0.16898306 |
| Invs        | 229.431626 | 0.49860252 | 0.31148274 | 1.60073883 | 0.10943478 | 0.34954524 |
| 4930579K19F | 14.6313307 | 0.4985937  | 0.43217472 | 1.15368547 | 0.24862914 | 0.54187974 |
| Tex264      | 3490.59621 | 0.49847816 | 0.22395578 | 2.22578833 | 0.02602836 | 0.14607256 |
| Gjb3        | 13471.8345 | 0.49827597 | 0.20639806 | 2.4141504  | 0.01577195 | 0.10517564 |
| Gm525       | 30.1385961 | 0.49796443 | 0.41799945 | 1.19130402 | 0.23353426 | 0.52506228 |
| Csf1        | 32.915242  | 0.49782511 | 0.40938206 | 1.21604034 | 0.22396955 | 0.51323805 |
| Nat14       | 36.8756056 | 0.49758935 | 0.41095397 | 1.21081528 | 0.22596621 | 0.51577873 |
| 1700003E16F | 17.8005095 | 0.49746854 | 0.41852506 | 1.18862308 | 0.23458802 | 0.5263048  |
| D130043K22I | 9.25346687 | 0.49729408 | 0.43074507 | 1.15449744 | 0.24829629 | 0.54162653 |
| Pafah2      | 1254.63871 | 0.49700023 | 0.28518028 | 1.74275804 | 0.08137589 | 0.29480621 |
| Olig3       | 16.8967817 | 0.49695605 | 0.4316095  | 1.15140201 | 0.24956689 | 0.54310658 |
| A430035B10I | 8.29811825 | 0.49692052 | 0.41834094 | 1.18783622 | 0.23489794 | 0.52680961 |
| Dlx5        | 3.66990867 | 0.49686329 | 0.34099326 | 1.45710588 | 0.14508715 | NA         |
| Commd9      | 1067.41338 | 0.49683448 | 0.23773304 | 2.08988402 | 0.03662822 | 0.18157649 |
| Sash3       | 465.456527 | 0.49667865 | 0.3109631  | 1.59722699 | 0.11021512 | 0.3509327  |
| Fam53c      | 3245.25092 | 0.49666877 | 0.22396847 | 2.21758343 | 0.02658325 | 0.14758876 |
| Mapkapk2    | 1823.49139 | 0.49611656 | 0.16857839 | 2.94294277 | 0.00325109 | 0.03461858 |
| Bcorl1      | 1501.69915 | 0.49602148 | 0.23968567 | 2.06946661 | 0.03850232 | 0.18734343 |
| C3          | 5.50527464 | 0.49600066 | 0.32722259 | 1.51578978 | 0.12957252 | NA         |
| Dync2h1     | 1397.91679 | 0.49573593 | 0.22226357 | 2.23039668 | 0.02572112 | 0.14502869 |
| Spry4       | 76.9457048 | 0.49566403 | 0.41665333 | 1.18963176 | NA         | NA         |
| Atp6v1h     | 11103.9321 | 0.49564604 | 0.27209722 | 1.82157699 | 0.06851919 | 0.26618586 |
| Slc16a13    | 395.406074 | 0.4955781  | 0.2814546  | 1.76077458 | 0.07827656 | 0.28824979 |
| Ocln        | 1322.88051 | 0.49553243 | 0.25455705 | 1.94664587 | 0.05157721 | 0.22364716 |
| 4930579G24I | 1619.63102 | 0.49547207 | 0.26093506 | 1.89883285 | 0.05758646 | 0.2392794  |
| Snph        | 7.51193435 | 0.49534956 | 0.42623023 | 1.1621643  | 0.24516873 | 0.53789771 |
| Mrpl57      | 2106.09748 | 0.4953483  | 0.21661117 | 2.28680868 | 0.02220699 | 0.13211207 |
| Prrx1       | 8.85667616 | 0.49510125 | 0.30674856 | 1.6140296  | NA         | NA         |
| Fam69a      | 1048.0934  | 0.49508646 | 0.18436725 | 2.6853276  | 0.00724587 | 0.06150688 |
| Ubc         | 3748.11743 | 0.49498561 | 0.35880051 | 1.37955659 | 0.16772321 | 0.44260371 |
| F2r         | 2650.47526 | 0.49463628 | 0.29431586 | 1.68063075 | 0.09283466 | 0.3171511  |
| Hist3h2a    | 96.7835097 | 0.49463367 | 0.36027975 | 1.37291555 | 0.1697786  | 0.44511837 |
| 9330151L19F | 259.674997 | 0.49462926 | 0.39447901 | 1.25387979 | 0.2098857  | 0.49634011 |
| Rtn4rl2     | 12.8222298 | 0.49462835 | 0.43163457 | 1.14594238 | 0.25181899 | 0.54548505 |
| Tspyl3      | 400.692011 | 0.49445049 | 0.25783157 | 1.91772671 | 0.05514567 | 0.23325384 |
| Tulp4       | 1167.50239 | 0.4943711  | 0.32600276 | 1.51646292 | 0.12940234 | 0.38455938 |



|             |            |            |            |            |            |            |
|-------------|------------|------------|------------|------------|------------|------------|
| Gm6787      | 11.6906686 | 0.49417381 | 0.43168625 | 1.14475226 | 0.2523118  | 0.54598821 |
| Dbn1        | 17.5091687 | 0.4941141  | 0.42990992 | 1.14934334 | 0.25041443 | 0.54405045 |
| Gramd1c     | 82.2307871 | 0.49406438 | 0.39959544 | 1.23641146 | 0.21630566 | 0.50358934 |
| Fam159a     | 116.072867 | 0.49400233 | 0.40327867 | 1.22496519 | 0.22058834 | 0.50895393 |
| Foxd2       | 13.2881684 | 0.4937443  | 0.42798954 | 1.15363638 | 0.24864928 | 0.54187974 |
| Ift122      | 1075.7772  | 0.49358296 | 0.18679928 | 2.64231724 | 0.00823409 | 0.0679215  |
| Grik4       | 279.53511  | 0.49286893 | 0.3297881  | 1.49450187 | 0.13504449 | 0.39257426 |
| Itga7       | 160.850318 | 0.49266256 | 0.32215429 | 1.52927522 | 0.12619623 | 0.37922272 |
| Rpl10l      | 13017.5546 | 0.49263646 | 0.26958216 | 1.82740752 | 0.06763852 | 0.26401773 |
| Hs3st4      | 17.101822  | 0.49224067 | 0.42778739 | 1.15066663 | 0.24986941 | 0.54338123 |
| Noxo1       | 147.982473 | 0.49213666 | 0.29796822 | 1.65164143 | 0.09860767 | 0.32850211 |
| Dab1        | 348.785117 | 0.49198439 | 0.26602427 | 1.84939664 | 0.06440056 | 0.25685896 |
| Btbd6       | 752.010486 | 0.49150239 | 0.24693822 | 1.99038603 | 0.04654843 | 0.20987956 |
| Tmem9b      | 624.034573 | 0.49140894 | 0.26300861 | 1.86841388 | 0.0617044  | 0.25017768 |
| 2410021H03I | 174.518721 | 0.49131776 | 0.34882696 | 1.40848562 | 0.15898732 | 0.42961109 |
| 4933407K13F | 212.195936 | 0.49127483 | 0.32974008 | 1.48988511 | 0.13625445 | 0.39419575 |
| Vil1        | 176.748474 | 0.49111496 | 0.30817    | 1.59364946 | 0.11101457 | 0.35232399 |
| Dnah6       | 50.2734452 | 0.49105103 | 0.42981987 | 1.14245771 | 0.25326381 | 0.54616042 |
| Ung         | 8439.04877 | 0.49101123 | 0.16990707 | 2.88988102 | 0.00385388 | 0.03889544 |
| Trim66      | 314.194355 | 0.49087154 | 0.36122869 | 1.35889412 | 0.17418014 | 0.45151891 |
| 8430429K09F | 116.447483 | 0.49082756 | 0.29099942 | 1.68669601 | 0.09166182 | 0.31531296 |
| Amph        | 2030.5349  | 0.49051938 | 0.27171083 | 1.80529932 | 0.07102786 | 0.27118934 |
| 1700021F07F | 8.18941861 | 0.49051484 | 0.40695543 | 1.20532816 | 0.22807664 | 0.51866656 |
| Pkig        | 1073.22844 | 0.49050997 | 0.21562136 | 2.27486729 | 0.02291389 | 0.13502612 |
| Cox14       | 2158.51446 | 0.49033343 | 0.23017717 | 2.13024358 | 0.03315151 | 0.17003269 |
| Flywch2     | 130.059139 | 0.49014133 | 0.32843986 | 1.49233203 | 0.13561213 | 0.39328705 |
| Nfia        | 65.2876312 | 0.49011711 | 0.36476882 | 1.34363764 | 0.17906559 | 0.45711817 |
| Ehd4        | 4174.58341 | 0.48975908 | 0.22631433 | 2.16406566 | 0.03045931 | 0.16089427 |
| Bmp8b       | 64.5164369 | 0.48968213 | 0.39197491 | 1.24926909 | 0.21156667 | 0.49812885 |
| Xlr4b       | 654.095014 | 0.48965598 | 0.31171013 | 1.57086962 | 0.11621294 | 0.36215582 |
| Gm7325      | 1703.06215 | 0.48962864 | 0.25641338 | 1.90952843 | 0.05619396 | 0.23611787 |
| Neu3        | 887.911419 | 0.48956981 | 0.28715475 | 1.70489887 | 0.08821329 | 0.30918323 |
| Nkain4      | 314.977054 | 0.48933343 | 0.3858206  | 1.26829264 | 0.20469346 | 0.49009824 |
| Adora2b     | 211.918961 | 0.489282   | 0.38061765 | 1.28549476 | 0.19861945 | 0.48170581 |
| Pdk3        | 3353.97906 | 0.489192   | 0.21377012 | 2.2884021  | 0.02211412 | 0.13185527 |
| Plekhf1     | 1756.72914 | 0.48913176 | 0.2285288  | 2.14035068 | 0.03232644 | 0.16751364 |
| Rhox3h      | 2.30276931 | 0.4891045  | 0.30832035 | 1.58635163 | 0.11265957 | NA         |
| Zfp282      | 1016.2841  | 0.48883629 | 0.18805506 | 2.59943175 | 0.00933782 | 0.07382763 |
| Vash1       | 1313.26452 | 0.4884937  | 0.38673093 | 1.26313586 | 0.20654036 | 0.49134299 |
| E130218I03R | 4.50475053 | 0.4880448  | 0.39809506 | 1.2259504  | 0.22021734 | NA         |
| E130317F20F | 99.335625  | 0.48785253 | 0.29875222 | 1.63296706 | 0.10247592 | 0.3363451  |

|             |            |            |            |            |            |            |
|-------------|------------|------------|------------|------------|------------|------------|
| Sebox       | 4.34816447 | 0.48759601 | 0.3781882  | 1.28929462 | 0.19729568 | NA         |
| Mid2        | 45.0725285 | 0.48744545 | 0.42409522 | 1.14937737 | 0.25040041 | 0.54405045 |
| Ptx3        | 13.0175401 | 0.48743958 | 0.35024939 | 1.39169286 | NA         | NA         |
| Tead3       | 323.848718 | 0.48741411 | 0.25111709 | 1.9409834  | 0.05226029 | 0.22593822 |
| Fbll1       | 2.60189605 | 0.48713989 | 0.32688836 | 1.49023321 | 0.13616293 | NA         |
| Alx3        | 5.97654151 | 0.48673037 | 0.38917621 | 1.25066834 | 0.2110555  | 0.49780377 |
| Slc25a18    | 9.56182728 | 0.48662597 | 0.42739385 | 1.13858906 | 0.2548746  | 0.54795202 |
| Rhobtb2     | 1425.83696 | 0.48651534 | 0.2170209  | 2.24179029 | 0.02497493 | 0.14236991 |
| Cers5       | 5729.1822  | 0.48642341 | 0.15815441 | 3.07562338 | 0.00210063 | 0.0252254  |
| Rbfox1      | 10.6704275 | 0.48641561 | 0.43094969 | 1.12870626 | 0.25902177 | 0.55124631 |
| 4930509E16F | 69.415507  | 0.48634677 | 0.40415512 | 1.20336658 | 0.22883449 | 0.51962142 |
| Sh3bgrl3    | 4099.04777 | 0.4863035  | 0.22556545 | 2.15593078 | 0.03108907 | 0.16322287 |
| Slc9a1      | 3696.31858 | 0.4857492  | 0.18669016 | 2.6019004  | 0.00927088 | 0.07348186 |
| Pcsk2os1    | 6.7762851  | 0.48462025 | 0.41940206 | 1.15550278 | 0.24788459 | 0.54110799 |
| Wdr63       | 6.24162828 | 0.48456967 | 0.41220944 | 1.1755424  | 0.23977778 | 0.53177186 |
| Rbfox3      | 28.7819886 | 0.4842635  | 0.41517141 | 1.16641823 | 0.24344539 | 0.53577799 |
| Mettl13     | 1196.29563 | 0.48405783 | 0.19637045 | 2.46502382 | 0.01370041 | 0.09547055 |
| Gm5142      | 3.90123117 | 0.48403248 | 0.36724132 | 1.31802295 | 0.18749596 | NA         |
| Col3a1      | 110.896568 | 0.48375398 | 0.3150672  | 1.53539938 | NA         | NA         |
| 1700020N15I | 16.0273569 | 0.48373652 | 0.42985118 | 1.12535811 | 0.26043731 | 0.5523497  |
| B930003M22  | 61.0201341 | 0.48372012 | 0.40392508 | 1.19754911 | 0.2310926  | 0.5227991  |
| Klhl5       | 509.804402 | 0.48352747 | 0.28728145 | 1.68311418 | 0.09235299 | 0.31658914 |
| Ppapdc1b    | 984.486943 | 0.483355   | 0.2086078  | 2.31705143 | 0.02050093 | 0.12577215 |
| Naip6       | 3.28911726 | 0.48331925 | 0.36101516 | 1.33877827 | 0.18064287 | NA         |
| Ano7        | 52.5334272 | 0.48311426 | 0.38991981 | 1.23900927 | 0.21534207 | 0.5026351  |
| Dhrs4       | 791.382176 | 0.48292506 | 0.27150754 | 1.77868012 | 0.07529222 | 0.28064941 |
| Pcdhga9     | 13.7208913 | 0.48279207 | 0.43222797 | 1.11698479 | 0.26400083 | 0.55577053 |
| Fam111a     | 4709.06558 | 0.48268987 | 0.16346776 | 2.95281394 | 0.00314892 | 0.03389114 |
| Ksr1        | 1066.87328 | 0.48246131 | 0.22155152 | 2.17764842 | 0.02943222 | 0.15726601 |
| Hs2st1      | 4105.63956 | 0.48226836 | 0.21106559 | 2.28492183 | 0.02231741 | 0.13256611 |
| Ctsa        | 13535.3131 | 0.48212929 | 0.22148804 | 2.17677349 | 0.02949747 | 0.1574177  |
| 5430421F17F | 5.60010427 | 0.48210667 | 0.38617131 | 1.24842695 | 0.21187475 | NA         |
| Tmem131     | 10926.4442 | 0.48191075 | 0.23395541 | 2.05984018 | 0.03941382 | 0.18964243 |
| Gns         | 3509.141   | 0.48154463 | 0.16701215 | 2.8832909  | 0.00393544 | 0.03948593 |
| Myl9        | 25.0723631 | 0.48152683 | 0.42306915 | 1.13817524 | 0.25504732 | 0.54797381 |
| 9330182O14I | 2.64368287 | 0.48149292 | 0.32751498 | 1.47014015 | 0.1415238  | NA         |
| Lamc2       | 3282.7244  | 0.48126149 | 0.25019565 | 1.92354064 | 0.05441219 | 0.23112918 |
| Stx2        | 489.178009 | 0.48125818 | 0.22664692 | 2.12338289 | 0.03372178 | 0.17199324 |
| Arl6ip5     | 2364.52382 | 0.48117114 | 0.2643149  | 1.82044653 | 0.06869103 | 0.26648321 |
| Klhdc1      | 133.29124  | 0.48097473 | 0.3947119  | 1.21854632 | 0.22301643 | 0.51207347 |
| Trim50      | 159.945161 | 0.4806143  | 0.42470461 | 1.13164371 | 0.25778426 | 0.55025528 |

|             |            |            |            |            |            |            |
|-------------|------------|------------|------------|------------|------------|------------|
| Abcg3       | 36.4133117 | 0.48054685 | 0.40653005 | 1.18206969 | 0.23717805 | 0.52931278 |
| 1810020005l | 35.1821666 | 0.48016968 | 0.43189452 | 1.11177537 | 0.26623475 | 0.55850756 |
| Per2        | 24.1849681 | 0.47950302 | 0.42810733 | 1.12005329 | 0.26269105 | 0.55510278 |
| AA388235    | 69.2644284 | 0.47936914 | 0.34586812 | 1.38598823 | 0.1657505  | 0.43941118 |
| H3f3b       | 40259.0485 | 0.47871874 | 0.17301975 | 2.76684443 | 0.00566018 | 0.05162545 |
| Fam216a     | 1984.96554 | 0.4785707  | 0.21782001 | 2.19709245 | 0.02801384 | 0.15296464 |
| Dazl        | 20804.0286 | 0.47843075 | 0.43191091 | 1.10770703 | 0.26798836 | 0.56067606 |
| Ankrd23     | 210.948337 | 0.47840143 | 0.27188904 | 1.75954658 | 0.07848472 | 0.2887428  |
| Insl3       | 25.1569426 | 0.47819667 | 0.42286172 | 1.13085828 | 0.25811475 | 0.55068493 |
| Hsd11b2     | 24.3498499 | 0.47817327 | 0.41202394 | 1.1605473  | 0.24582605 | 0.53902516 |
| Smoc1       | 3951.70057 | 0.4779135  | 0.16977398 | 2.81499853 | 0.00487775 | 0.04605575 |
| Panx1       | 1019.82388 | 0.47782711 | 0.1873678  | 2.5502093  | 0.01076583 | 0.08119271 |
| Gm7173      | 8.8113006  | 0.47779923 | 0.40786647 | 1.17145995 | 0.24141395 | 0.53395367 |
| Med22       | 2385.91405 | 0.47757063 | 0.20299371 | 2.35263762 | 0.01864079 | 0.11774287 |
| Mrpl17      | 8145.25698 | 0.47730177 | 0.19612504 | 2.43366057 | 0.014947   | 0.10123731 |
| C630028M04  | 2.55289237 | 0.47721758 | 0.30513472 | 1.56395696 | 0.11782768 | NA         |
| Car7        | 60.6711448 | 0.47714428 | 0.3669025  | 1.30046614 | 0.19344125 | 0.47612768 |
| Mir377      | 5.4891128  | 0.47712814 | 0.40522065 | 1.17745268 | 0.23901487 | NA         |
| Nbea        | 346.681228 | 0.47668631 | 0.29463749 | 1.6178739  | 0.10568978 | 0.34245662 |
| Ccdc11      | 31.9360038 | 0.47642034 | 0.3877592  | 1.22865    | 0.21920306 | 0.50770735 |
| Clec18a     | 12.8081582 | 0.47636609 | 0.43149567 | 1.10398811 | 0.26959829 | 0.56260264 |
| Fut11       | 700.361619 | 0.47635184 | 0.21035462 | 2.26451806 | 0.02354227 | 0.13727253 |
| Atg2a       | 4422.75398 | 0.47615889 | 0.25134841 | 1.89441776 | 0.05816958 | 0.24103255 |
| Pkd1l3      | 18.3765574 | 0.47611254 | 0.43169483 | 1.10289146 | 0.2700743  | 0.56314367 |
| Sod2        | 20564.9641 | 0.47574187 | 0.16956417 | 2.80567453 | 0.00502114 | 0.04712355 |
| Rsad1       | 362.806747 | 0.47566641 | 0.2039025  | 2.33281306 | 0.01965796 | 0.12228037 |
| Hs3st1      | 77.2351467 | 0.47566289 | 0.41655023 | 1.14191002 | 0.25349142 | 0.54626394 |
| Gm10638     | 5.55058003 | 0.47539597 | 0.41253195 | 1.15238583 | 0.24916256 | NA         |
| Ildr2       | 14.1695832 | 0.47537805 | 0.42773869 | 1.11137491 | 0.26640701 | 0.55868408 |
| Elf3        | 8613.29315 | 0.47533203 | 0.25645726 | 1.85345517 | 0.06381715 | 0.25555771 |
| Zfp560      | 228.711172 | 0.47516191 | 0.3577878  | 1.32805509 | 0.18415991 | 0.4644599  |
| Cdkl3       | 297.555174 | 0.47506268 | 0.27499671 | 1.72752135 | 0.08407407 | 0.30042186 |
| Tmem74      | 13.4526572 | 0.47504291 | 0.43218515 | 1.09916528 | 0.27169598 | 0.56523668 |
| Dok1        | 909.847388 | 0.47500205 | 0.23753151 | 1.99974327 | 0.04552799 | 0.207201   |
| Tcf19       | 1045.69104 | 0.47488991 | 0.21334558 | 2.22591866 | 0.02601963 | 0.14607256 |
| Gast        | 2.72752185 | 0.47461411 | 0.32704243 | 1.451231   | 0.14671555 | NA         |
| Fst         | 444.706861 | 0.47448889 | 0.27108559 | 1.75032874 | 0.0800616  | 0.29191981 |
| Cisd2       | 1389.40071 | 0.47447411 | 0.22321027 | 2.12568224 | 0.03352973 | 0.17140723 |
| Peril       | 120.938717 | 0.4743903  | 0.35922369 | 1.32059857 | 0.18663525 | 0.46774613 |
| Papss2      | 64.0336841 | 0.47436305 | 0.40557206 | 1.16961471 | 0.24215605 | 0.53454646 |
| 2810429I04R | 94.7757054 | 0.47435585 | 0.4322646  | 1.09737382 | 0.27247801 | 0.56572838 |

|             |            |            |            |            |            |            |
|-------------|------------|------------|------------|------------|------------|------------|
| A3galt2     | 2.30992505 | 0.47428181 | 0.30476337 | 1.5562297  | 0.11965348 | NA         |
| 4933411K16F | 5.30903537 | 0.47427074 | 0.40433868 | 1.17295417 | 0.24081418 | NA         |
| Gde1        | 3480.28132 | 0.47425752 | 0.21346077 | 2.22175493 | 0.02629987 | 0.14666206 |
| 1110008F13F | 6419.88539 | 0.47413197 | 0.18656881 | 2.54132498 | 0.01104332 | 0.08256476 |
| Pdgfb       | 388.905315 | 0.47406649 | 0.3149359  | 1.50527927 | 0.13225229 | 0.38856271 |
| Rap1gds1    | 3130.10511 | 0.47402575 | 0.36478276 | 1.29947411 | 0.19378127 | 0.47646674 |
| Myo1g       | 223.7668   | 0.47391025 | 0.24264219 | 1.95312381 | 0.05080493 | 0.22164643 |
| Dram1       | 26.1378145 | 0.4737391  | 0.4254769  | 1.11343084 | 0.26552344 | 0.55746658 |
| Gm6623      | 17.035767  | 0.47331195 | 0.420293   | 1.1261476  | 0.26010305 | 0.55222808 |
| Msrb3       | 124.018662 | 0.47300665 | 0.33463649 | 1.41349397 | 0.15751053 | 0.42732839 |
| D130040H23  | 568.095575 | 0.4729851  | 0.33537382 | 1.41032208 | 0.1584446  | 0.42874056 |
| Lonrf3      | 913.410153 | 0.47258307 | 0.39273276 | 1.20331972 | 0.22885262 | 0.51962142 |
| A730098P11f | 25.5101235 | 0.47240453 | 0.40253957 | 1.17356047 | 0.24057112 | 0.53277151 |
| 1700019B21f | 75.7663196 | 0.47234965 | 0.42960231 | 1.09950444 | 0.2715481  | 0.56508022 |
| Adam15      | 2176.58588 | 0.47232028 | 0.1789511  | 2.63938178 | 0.00830574 | 0.0682911  |
| Sdpr        | 4.25353309 | 0.47213971 | 0.31559692 | 1.49602126 | NA         | NA         |
| 1700108F19F | 47.4783616 | 0.47210556 | 0.36788822 | 1.28328533 | 0.19939213 | 0.48250548 |
| C030039L03F | 3692.62968 | 0.47186616 | 0.18536131 | 2.54565612 | 0.01090726 | 0.08170461 |
| Zfp202      | 78.0840876 | 0.47150384 | 0.32511321 | 1.45027588 | 0.1469816  | 0.41146911 |
| lqub        | 66.4970827 | 0.47110104 | 0.39978085 | 1.1783982  | 0.2386379  | 0.53071461 |
| 9330179D12l | 43.6597293 | 0.47105464 | 0.42535379 | 1.10744196 | 0.26810289 | 0.56076235 |
| Shpk        | 228.850065 | 0.47090999 | 0.29217523 | 1.61173822 | 0.10701892 | 0.34516082 |
| Dchs1       | 9.36806786 | 0.47089155 | 0.42746118 | 1.10160074 | 0.27063529 | 0.56385977 |
| Gm1123      | 4.35087915 | 0.47088718 | 0.39237198 | 1.20010398 | 0.23009896 | NA         |
| Arhgdig     | 336.635908 | 0.47080586 | 0.31158997 | 1.51097889 | 0.13079383 | 0.38666893 |
| Ptk2b       | 930.343576 | 0.47070114 | 0.30164246 | 1.56046047 | 0.11865111 | 0.36626554 |
| Prepl       | 4057.72565 | 0.47053974 | 0.1631998  | 2.88321269 | 0.00393642 | 0.03948593 |
| Myo19       | 4809.63517 | 0.47052901 | 0.21035322 | 2.23685199 | 0.02529601 | 0.14352754 |
| Mt1         | 12604.6579 | 0.47052754 | 0.26152536 | 1.79916601 | 0.07199242 | 0.27366272 |
| Fam102a     | 4393.91047 | 0.47043219 | 0.20828282 | 2.25862216 | 0.0239069  | 0.13851571 |
| Cetn4       | 67.5114438 | 0.47025571 | 0.3847427  | 1.22226026 | 0.22160922 | 0.50979956 |
| Loxl3       | 162.257194 | 0.47020838 | 0.33524239 | 1.40259223 | 0.16073847 | 0.43208565 |
| Obsl1       | 807.195243 | 0.47003855 | 0.3198647  | 1.46949179 | 0.14169945 | 0.40234221 |
| Pcdhgb1     | 7.97904862 | 0.46986295 | 0.41498787 | 1.13223297 | 0.2575365  | 0.55010645 |
| Ppp1r3d     | 13.7968049 | 0.46984914 | 0.41752878 | 1.12530958 | 0.26045787 | 0.5523497  |
| Akr1a1      | 21258.0227 | 0.46976133 | 0.18439971 | 2.5475166  | 0.01084927 | 0.08140944 |
| Wnt11       | 122.131909 | 0.46974491 | 0.27583455 | 1.7029952  | 0.08856897 | 0.30979218 |
| Gm5176      | 14.8146019 | 0.4695961  | 0.42669687 | 1.10053795 | 0.2710978  | 0.56467211 |
| Fbxl12os    | 19.5969388 | 0.46958513 | 0.41471618 | 1.13230482 | 0.2575063  | 0.55010645 |
| Stab2       | 143.61971  | 0.46955237 | 0.41245804 | 1.13842457 | 0.25494324 | 0.54796018 |
| She         | 1003.58974 | 0.46939701 | 0.2822049  | 1.66331986 | 0.09624843 | 0.32400358 |

|             |            |            |            |            |            |            |
|-------------|------------|------------|------------|------------|------------|------------|
| Casp6       | 1028.85363 | 0.46926222 | 0.29295376 | 1.60183033 | 0.10919313 | 0.34910823 |
| Ly6h        | 7.41606007 | 0.46917453 | 0.42589524 | 1.10161957 | 0.2706271  | 0.56385977 |
| Dlgap4      | 3126.75742 | 0.46909484 | 0.18401555 | 2.54921297 | 0.01079663 | 0.0813139  |
| Nt5c2       | 3073.20069 | 0.46873065 | 0.24690369 | 1.89843519 | 0.05763878 | 0.2392794  |
| Gpr137      | 756.346227 | 0.46870729 | 0.21098674 | 2.22150114 | 0.02631704 | 0.14666206 |
| Tspan9      | 2099.49514 | 0.46853776 | 0.33118076 | 1.41474931 | 0.15714201 | 0.42655183 |
| Crim1       | 388.2686   | 0.468488   | 0.40474785 | 1.15748115 | 0.24707584 | 0.54002478 |
| Egr2        | 5.07467093 | 0.4680906  | 0.33462168 | 1.39886515 | NA         | NA         |
| Cdhr5       | 4.53046422 | 0.46799842 | 0.39483125 | 1.18531251 | 0.23589391 | NA         |
| Map3k9      | 1902.28584 | 0.46795065 | 0.21444511 | 2.1821465  | 0.02909872 | 0.1563629  |
| Als2        | 4369.78318 | 0.46774343 | 0.23595794 | 1.98231698 | 0.04744377 | 0.21243828 |
| Map3k19     | 6.10294706 | 0.46766996 | 0.4167343  | 1.12222575 | 0.26176647 | 0.55406701 |
| Kcng4       | 35.2581219 | 0.46750468 | 0.42763361 | 1.0932365  | 0.27428997 | 0.56699234 |
| Rdh12       | 110.322007 | 0.46732095 | 0.30942563 | 1.5102852  | 0.13097067 | 0.38706287 |
| Ttc17       | 1526.49755 | 0.46732027 | 0.18716142 | 2.49688354 | 0.01252901 | 0.08979111 |
| Dolk        | 713.863179 | 0.46718098 | 0.20679427 | 2.25915819 | 0.02387355 | 0.13838335 |
| 4930470P17F | 3.1154408  | 0.4671549  | 0.35813617 | 1.3044058  | 0.19209526 | NA         |
| LOC10105615 | 4.54865727 | 0.46701082 | 0.3491595  | 1.33752859 | 0.18105016 | NA         |
| Dpp7        | 3264.73076 | 0.46660617 | 0.2085355  | 2.23753833 | 0.02525118 | 0.14341894 |
| Rgs6        | 10.0576008 | 0.46624492 | 0.42125116 | 1.1068098  | 0.26837617 | 0.56110753 |
| Runx2       | 8.749211   | 0.46619349 | 0.3910378  | 1.19219544 | 0.23318462 | 0.5247835  |
| Bcl2l15     | 65.1112688 | 0.4657852  | 0.41491253 | 1.12261058 | 0.26160292 | 0.55387161 |
| Ccdc63      | 382.647384 | 0.46557713 | 0.28654093 | 1.62481895 | 0.10420114 | 0.33956461 |
| Gm7904      | 5.92190045 | 0.46549235 | 0.40911395 | 1.1378061  | 0.25520146 | NA         |
| Elovl4      | 402.132129 | 0.46538334 | 0.25311955 | 1.83859106 | 0.06597536 | 0.2602036  |
| Lrrc16a     | 1424.75929 | 0.46536351 | 0.25672082 | 1.81272212 | 0.06987469 | 0.26916555 |
| Gm16740     | 88.3794306 | 0.46516659 | 0.30206612 | 1.53994955 | 0.12357265 | 0.37540112 |
| Gm2518      | 3.25234713 | 0.46506727 | 0.35657343 | 1.30426788 | 0.19214226 | NA         |
| Akr7a5      | 2086.05712 | 0.46497105 | 0.19630752 | 2.36858499 | 0.01785628 | 0.11450844 |
| Serpind1    | 2.51657329 | 0.46438792 | 0.3220464  | 1.44199068 | 0.149305   | NA         |
| Cdc123      | 5508.15033 | 0.4643354  | 0.18522008 | 2.50693882 | 0.01217818 | 0.08824923 |
| Cd2         | 187.96227  | 0.46426865 | 0.4065373  | 1.14200751 | 0.2534509  | 0.54626394 |
| Scn2b       | 413.32228  | 0.46416526 | 0.27153044 | 1.70944099 | 0.08736929 | 0.30760242 |
| 2810442I21R | 112.932659 | 0.46409052 | 0.36924942 | 1.25684835 | 0.20880855 | 0.49484636 |
| Wdr96       | 176.223503 | 0.46397853 | 0.24913111 | 1.86238693 | 0.06254857 | 0.25225436 |
| Fam217b     | 49.9118921 | 0.46379398 | 0.42330861 | 1.09564033 | 0.27323621 | 0.56626801 |
| Dleu2       | 120.243653 | 0.46319775 | 0.36048334 | 1.28493527 | 0.19881491 | 0.48195956 |
| 1700023L04F | 123.403729 | 0.46267972 | 0.42137881 | 1.09801372 | 0.2721985  | 0.56560113 |
| Ttc30b      | 199.85883  | 0.46258546 | 0.27633215 | 1.67401967 | 0.09412673 | 0.3197668  |
| Gm6639      | 16.6406671 | 0.46251445 | 0.43094874 | 1.07324701 | 0.2831603  | 0.57568648 |
| Adck2       | 339.471124 | 0.46154526 | 0.22642735 | 2.03838123 | 0.04151182 | 0.19544364 |

|             |            |            |            |            |            |            |
|-------------|------------|------------|------------|------------|------------|------------|
| Homer2      | 1186.66334 | 0.46148116 | 0.33098893 | 1.39424953 | 0.16324227 | 0.43524923 |
| Tenc1       | 256.432099 | 0.46131536 | 0.24370631 | 1.89291512 | 0.05836916 | 0.24160201 |
| Shisa5      | 1744.24351 | 0.46040831 | 0.20620336 | 2.23278758 | 0.02556296 | 0.14450364 |
| Cd38        | 2977.30532 | 0.46040635 | 0.29501769 | 1.56060594 | 0.11861676 | 0.36626554 |
| Vmn2r27     | 2.54404864 | 0.46026195 | 0.32319551 | 1.42409759 | 0.15441822 | NA         |
| 4930578M01  | 6.79669743 | 0.46019586 | 0.42125653 | 1.09243615 | 0.27464144 | 0.56715903 |
| Vpreb3      | 32.3033092 | 0.45998591 | 0.4079805  | 1.12747033 | 0.25954368 | 0.55161456 |
| 4933416M07  | 13.2511393 | 0.45995358 | 0.40828407 | 1.12655282 | 0.2599316  | 0.55206177 |
| Rnf113a2    | 1849.41269 | 0.45941315 | 0.2344639  | 1.95941951 | 0.05006368 | 0.21981566 |
| Heg1        | 345.983275 | 0.4593388  | 0.27296586 | 1.68277016 | 0.09241959 | 0.31658914 |
| Tfpi        | 2846.24398 | 0.45920033 | 0.22341784 | 2.0553432  | 0.03984587 | 0.19095318 |
| Prdm13      | 9.77400681 | 0.45907892 | 0.42362088 | 1.08370229 | 0.27849682 | 0.57075699 |
| Zhx2        | 41.8064912 | 0.45905226 | 0.39259522 | 1.16927625 | 0.24229235 | 0.53460391 |
| Spata33     | 25.2687623 | 0.45904601 | 0.41014124 | 1.11923885 | 0.26303826 | 0.55523455 |
| 2610306M01  | 122.85795  | 0.45879946 | 0.28624732 | 1.60280787 | 0.10897708 | 0.34899146 |
| 3632454L22F | 9.94787922 | 0.45877198 | 0.40089979 | 1.14435575 | 0.25247613 | 0.54598821 |
| Rbm24       | 222.155528 | 0.45869897 | 0.37477174 | 1.22394226 | 0.22097401 | 0.50916681 |
| 2810454H06l | 27.2062663 | 0.45866445 | 0.39208476 | 1.16980942 | 0.24207767 | 0.53454646 |
| Tmppe       | 4425.35829 | 0.45862634 | 0.24757437 | 1.85247909 | 0.06395706 | 0.25595508 |
| Slc25a43    | 98.0756064 | 0.4585808  | 0.34510542 | 1.32881368 | 0.18390945 | 0.46440776 |
| 1700003G18l | 2.4723821  | 0.45841861 | 0.32339126 | 1.41753558 | 0.1563264  | NA         |
| Ppm1l       | 621.388375 | 0.45823529 | 0.28381644 | 1.61454812 | 0.10640859 | 0.34381051 |
| Psen1       | 3283.91416 | 0.45805386 | 0.16710573 | 2.74110207 | 0.00612335 | 0.05446669 |
| Irgc1       | 16.9111497 | 0.45800294 | 0.4317721  | 1.0607516  | 0.2888028  | 0.58216601 |
| Ugdh        | 5911.02671 | 0.45771596 | 0.14852828 | 3.08167542 | 0.00205839 | 0.02494937 |
| Prrt3       | 1137.65073 | 0.45756738 | 0.42948661 | 1.06538218 | 0.28670302 | 0.57993218 |
| 2310009B15f | 144.733512 | 0.45754762 | 0.29241169 | 1.56473783 | 0.1176444  | 0.36422218 |
| Crb2        | 129.579234 | 0.45748538 | 0.30969635 | 1.47720624 | 0.13962036 | 0.39955955 |
| Pomc        | 65.5982851 | 0.45727519 | 0.35062838 | 1.30415911 | 0.19217934 | 0.4751259  |
| Pitpnm2     | 1022.83661 | 0.45716393 | 0.24561654 | 1.86129132 | 0.06270305 | 0.25268077 |
| Relt        | 495.369701 | 0.45709053 | 0.22287417 | 2.05089056 | 0.04027761 | 0.19201626 |
| Slc3a1      | 7.63276078 | 0.45683927 | 0.42571274 | 1.07311627 | 0.28321895 | 0.57570918 |
| Serpinf2    | 5.49020657 | 0.45669316 | 0.41145295 | 1.10995233 | 0.26701957 | NA         |
| Rmdn2       | 329.11757  | 0.45601829 | 0.29871091 | 1.52662081 | 0.12685533 | 0.38060552 |
| H2afj       | 2940.58038 | 0.45601439 | 0.20282974 | 2.24826194 | 0.02455949 | 0.14103569 |
| Irx3        | 40.0313033 | 0.45595991 | 0.43213274 | 1.05513853 | 0.29136197 | 0.58507276 |
| Calcoco1    | 2472.00081 | 0.45594537 | 0.20182177 | 2.25914858 | 0.02387414 | 0.13838335 |
| Tpd52l1     | 3175.40421 | 0.45565267 | 0.23453707 | 1.9427746  | 0.0520434  | 0.22506309 |
| Fgf17       | 576.392936 | 0.45563017 | 0.37530522 | 1.21402565 | 0.22473793 | 0.51410702 |
| Gm14327     | 5.19511834 | 0.45551866 | 0.3978293  | 1.14501035 | 0.25220487 | NA         |
| Gpr21       | 14.5745757 | 0.45548641 | 0.42949755 | 1.06050992 | 0.28891268 | 0.58216601 |

|             |            |            |            |            |            |            |
|-------------|------------|------------|------------|------------|------------|------------|
| Cdh12       | 3.30308682 | 0.4554247  | 0.33428406 | 1.3623883  | 0.17307537 | NA         |
| Sirt3       | 1284.21616 | 0.45541966 | 0.20471158 | 2.22468925 | 0.02610211 | 0.14613366 |
| Gm128       | 313.831897 | 0.45539379 | 0.31668748 | 1.43799117 | 0.15043656 | 0.41671517 |
| Rpa2        | 11519.8936 | 0.45538878 | 0.2090801  | 2.17805892 | 0.02940165 | 0.15717603 |
| Mrap2       | 2.67325886 | 0.45537015 | 0.34434304 | 1.32243169 | 0.18602444 | NA         |
| Acsm3       | 11.9168049 | 0.45529778 | 0.43185111 | 1.05429341 | 0.29174861 | 0.58556822 |
| Gdpd3       | 69.8150715 | 0.45521665 | 0.39542848 | 1.15119845 | 0.2496506  | 0.54313326 |
| Daf2        | 5.9643336  | 0.45516775 | 0.39458535 | 1.15353436 | 0.24869112 | 0.54187974 |
| Ido2        | 206.712661 | 0.45511492 | 0.42351519 | 1.07461297 | 0.28254804 | 0.57490302 |
| Gm3219      | 75.3561435 | 0.45502173 | 0.31640048 | 1.4381196  | 0.15040012 | 0.41668845 |
| 1700001G11I | 31.4439047 | 0.45496516 | 0.41289872 | 1.10188078 | 0.2705135  | 0.5637571  |
| Cyb5d1      | 284.152142 | 0.45493918 | 0.27824029 | 1.63505861 | 0.10203676 | 0.33556847 |
| Pias3       | 2339.73725 | 0.45484232 | 0.19778771 | 2.29964907 | 0.02146811 | 0.12955009 |
| Inhbe       | 71.5818386 | 0.45453122 | 0.39142787 | 1.16121323 | 0.2455552  | 0.53851768 |
| Lin37       | 1153.44034 | 0.45452413 | 0.20916301 | 2.17306171 | 0.02977567 | 0.15861733 |
| Bhmt        | 2025.7287  | 0.45452347 | 0.41239555 | 1.10215414 | 0.27039467 | 0.56366052 |
| Ahsg        | 73.767662  | 0.45433939 | 0.35951772 | 1.26374687 | 0.2063209  | 0.49111298 |
| Celsr1      | 3603.80386 | 0.45414147 | 0.24824307 | 1.82942256 | 0.06733633 | 0.26336702 |
| Apol8       | 15.9819576 | 0.45391797 | 0.42877592 | 1.05863681 | 0.28976522 | 0.58316797 |
| Ube2e2      | 447.574242 | 0.45391377 | 0.32929308 | 1.37844916 | 0.16806465 | 0.44308872 |
| Gm16062     | 53.7553859 | 0.45378811 | 0.36663788 | 1.23770111 | 0.21582691 | 0.50281353 |
| Gm7104      | 5.4435336  | 0.45374905 | 0.37928647 | 1.19632278 | 0.23157062 | NA         |
| Asf1a       | 3823.73182 | 0.4535309  | 0.17450556 | 2.59894816 | 0.00935099 | 0.07382763 |
| Prpf2       | 2333.30199 | 0.45352043 | 0.24214055 | 1.87296353 | 0.06107342 | 0.248887   |
| Nr1h4       | 5.31279111 | 0.45349755 | 0.34737316 | 1.30550543 | 0.1917208  | NA         |
| Stk33       | 428.241064 | 0.45346732 | 0.42201887 | 1.07451907 | 0.2825901  | 0.57490302 |
| AA414768    | 485.55226  | 0.45341998 | 0.27432092 | 1.65288156 | 0.09835497 | 0.32810942 |
| Rnd3        | 5224.21104 | 0.45340305 | 0.19426309 | 2.333964   | 0.01959761 | 0.12195374 |
| Pusl1       | 1410.00164 | 0.45340181 | 0.2318713  | 1.95540292 | 0.05053553 | 0.22106118 |
| Mro         | 2.55622108 | 0.4531951  | 0.3233     | 1.40177886 | 0.16098129 | NA         |
| 1810062O18I | 3.86518713 | 0.45291354 | 0.36215258 | 1.25061524 | 0.21107489 | NA         |
| Gal         | 7.50626523 | 0.45285698 | 0.42710433 | 1.06029592 | 0.28901    | 0.58221217 |
| Fndc3b      | 3657.58329 | 0.45278846 | 0.22713264 | 1.99349796 | 0.04620695 | 0.20895868 |
| Nipa1       | 304.615317 | 0.4526245  | 0.27861632 | 1.62454409 | 0.10425974 | 0.33956461 |
| Trpc3       | 7.62715228 | 0.45234439 | 0.41840768 | 1.0811092  | 0.27964854 | 0.57206189 |
| Cyp2u1      | 73.9563144 | 0.45205983 | 0.39720857 | 1.13809182 | 0.25508214 | 0.54797381 |
| Rhog        | 457.578908 | 0.45174877 | 0.22691027 | 1.99086968 | 0.04649522 | 0.20982214 |
| Rnf130      | 2291.52413 | 0.4515807  | 0.2617565  | 1.72519384 | 0.08449255 | 0.30143234 |
| Rsph3b      | 65.2587451 | 0.45142628 | 0.35011048 | 1.28938237 | 0.19726519 | 0.48031705 |
| Pgm2l1      | 1490.94074 | 0.45122575 | 0.32501162 | 1.38833727 | 0.16503437 | 0.43853774 |
| 1700024F13F | 13.37634   | 0.45093911 | 0.41137767 | 1.09616819 | 0.27300518 | 0.56626801 |

|             |            |            |            |            |            |            |
|-------------|------------|------------|------------|------------|------------|------------|
| Ubxn8       | 1362.02066 | 0.45031423 | 0.28416765 | 1.58467801 | 0.11303951 | 0.35620617 |
| Asic3       | 26.1211236 | 0.45009658 | 0.41859248 | 1.07526198 | 0.28225745 | 0.57469219 |
| Apcdd1      | 739.620272 | 0.45009523 | 0.23310696 | 1.93085286 | 0.05350125 | 0.22915812 |
| Tinagl1     | 631.182117 | 0.45006836 | 0.39376259 | 1.14299422 | 0.25304099 | 0.54607863 |
| Hfm1        | 190.558247 | 0.44997501 | 0.31231626 | 1.44076716 | 0.14965047 | 0.41542565 |
| Hps5        | 2865.12632 | 0.44985535 | 0.15292957 | 2.94158517 | 0.00326537 | 0.03473309 |
| Csrp1       | 7957.52539 | 0.44985007 | 0.2120219  | 2.12171514 | 0.03386167 | 0.17253695 |
| Fer1l4      | 52.2201021 | 0.4498111  | 0.39369591 | 1.14253435 | 0.25323198 | 0.54616042 |
| Mmp20       | 3.32299357 | 0.44977821 | 0.35780897 | 1.25703449 | 0.20874115 | NA         |
| Atp8b4      | 3.77497226 | 0.4497615  | 0.36487087 | 1.23265936 | 0.21770288 | NA         |
| Sphkap      | 5.01117794 | 0.44972053 | 0.39322588 | 1.14366972 | 0.25276063 | NA         |
| Ficd        | 481.373908 | 0.44964768 | 0.24151713 | 1.86176311 | 0.06263649 | 0.25248825 |
| Igf2os      | 6.9413759  | 0.44953974 | 0.40265428 | 1.116441   | 0.26423341 | 0.55583648 |
| 9530053A07f | 347.591824 | 0.44934753 | 0.22384728 | 2.00738433 | 0.04470876 | 0.20479112 |
| 4930562C15f | 34.4597303 | 0.44921213 | 0.43128789 | 1.04155981 | 0.29761581 | 0.59197672 |
| Dync1i1     | 33.3182641 | 0.44850118 | 0.40899657 | 1.09658909 | 0.27282106 | 0.56606275 |
| Naip2       | 2.69697426 | 0.44785076 | 0.33969287 | 1.31839908 | 0.18737009 | NA         |
| Zc4h2       | 702.248655 | 0.4476992  | 0.22969714 | 1.94908476 | 0.0512853  | 0.22283815 |
| Tspan1      | 250.766215 | 0.44761542 | 0.39650033 | 1.12891563 | 0.25893343 | 0.55124631 |
| Mettl25     | 1206.21251 | 0.44752921 | 0.20179882 | 2.21769988 | 0.0265753  | 0.14758876 |
| Mavs        | 5110.37412 | 0.4474164  | 0.21290139 | 2.10151941 | 0.0355954  | 0.17867786 |
| 1-Mar       | 11.2826732 | 0.44732467 | 0.43226286 | 1.0348441  | 0.30074172 | 0.59554751 |
| Aff3        | 101.287146 | 0.4472831  | 0.39369229 | 1.13612359 | 0.25590484 | 0.54871314 |
| Il11ra1     | 123.181086 | 0.44727587 | 0.31906448 | 1.40183538 | 0.16096441 | 0.43209007 |
| Zrsr1       | 3416.10775 | 0.44717746 | 0.22838844 | 1.95796886 | 0.05023367 | 0.22042431 |
| Ptp4a1      | 494.246735 | 0.4471535  | 0.31696751 | 1.41072347 | 0.15832617 | 0.42858888 |
| Pld3        | 4492.73843 | 0.44714939 | 0.19535008 | 2.28896447 | 0.02208142 | 0.13171773 |
| Cxx1c       | 40.6212961 | 0.44712038 | 0.42844516 | 1.04358836 | 0.29667588 | 0.59122008 |
| Gm5136      | 3.61974462 | 0.44705304 | 0.36776689 | 1.21558806 | 0.22414189 | NA         |
| Lrif1       | 1214.71813 | 0.44696941 | 0.2004296  | 2.23005693 | 0.02574366 | 0.14505062 |
| Nr4a2       | 62.48384   | 0.44674209 | 0.40307791 | 1.1083269  | 0.26772066 | 0.56056604 |
| 1700091H14l | 12.5247563 | 0.44655416 | 0.42169334 | 1.05895473 | 0.2896204  | 0.58302742 |
| Fgf11       | 437.733162 | 0.44646719 | 0.25822678 | 1.72897324 | 0.08381389 | 0.2998942  |
| Ryr2        | 607.497973 | 0.44637624 | 0.26735052 | 1.66962926 | 0.09499274 | 0.32183418 |
| Sult4a1     | 2361.01591 | 0.44627667 | 0.25627794 | 1.74137758 | 0.08161742 | 0.29530769 |
| Zfp9        | 86.4468969 | 0.44621889 | 0.30839771 | 1.44689427 | 0.14792654 | 0.41286456 |
| Zfand3      | 2954.92613 | 0.44591188 | 0.14848595 | 3.00305783 | 0.00267282 | 0.03005421 |
| Gm11696     | 104.682731 | 0.44572146 | 0.30622703 | 1.45552617 | 0.14552365 | 0.4089048  |
| Necab3      | 771.049265 | 0.44558951 | 0.27626209 | 1.61292311 | 0.10676121 | 0.34473498 |
| Calr4       | 1740.965   | 0.44545889 | 0.43220647 | 1.03066225 | 0.30269923 | 0.59790613 |
| Pcdhgc3     | 979.875547 | 0.44522644 | 0.27925639 | 1.59432857 | 0.11086246 | 0.35191307 |



|             |            |            |            |            |            |            |
|-------------|------------|------------|------------|------------|------------|------------|
| Dcn         | 6.55864567 | 0.44522598 | 0.29539279 | 1.50723373 | NA         | NA         |
| Havcr1      | 6.84551267 | 0.44495291 | 0.37913451 | 1.1736017  | 0.2405546  | 0.53277151 |
| Ier2        | 4891.6511  | 0.44491401 | 0.18412552 | 2.41636257 | 0.01567644 | 0.10462848 |
| Spata17     | 6.2192433  | 0.44478697 | 0.41755003 | 1.06523036 | 0.2867717  | 0.57999566 |
| Amy1        | 5.53427025 | 0.4447294  | 0.40327897 | 1.10278352 | 0.27012119 | NA         |
| Rgs8        | 5.23513029 | 0.44453759 | 0.40392314 | 1.10054993 | 0.27109259 | NA         |
| Btbd16      | 4.95659209 | 0.44450367 | 0.38366241 | 1.15858019 | 0.24662735 | NA         |
| Alox8       | 22.594542  | 0.4444228  | 0.4187307  | 1.0613571  | 0.28852765 | 0.5820921  |
| Ttc39a      | 136.217561 | 0.44440134 | 0.37470889 | 1.18599091 | 0.23562589 | 0.52749347 |
| Hal         | 1394.44723 | 0.44419792 | 0.39353545 | 1.12873674 | 0.25900891 | 0.55124631 |
| Crip3       | 7.67069785 | 0.44414882 | 0.41814833 | 1.06218007 | 0.28815395 | 0.58175514 |
| Gm20748     | 734.394578 | 0.44397087 | 0.23869951 | 1.85995715 | 0.06289159 | 0.25324368 |
| Slc9a7      | 23.5161777 | 0.44382845 | 0.42229823 | 1.05098346 | 0.29326619 | 0.5870231  |
| Trim52      | 270.088116 | 0.44355904 | 0.41808046 | 1.06094182 | 0.28871634 | 0.58216601 |
| 1700023F06F | 44.3511684 | 0.4434958  | 0.38363241 | 1.15604362 | 0.24766331 | 0.54081517 |
| 2700089E24F | 1464.627   | 0.44326646 | 0.2609322  | 1.69878025 | 0.0893606  | 0.31116396 |
| Slc25a14    | 526.080917 | 0.44326027 | 0.211587   | 2.09493151 | 0.03617708 | 0.18049079 |
| 4930590J08R | 12.2590902 | 0.44314207 | 0.43203618 | 1.02570592 | 0.30503022 | 0.59969907 |
| Zfat        | 787.806844 | 0.44309942 | 0.22677448 | 1.95392099 | 0.05071056 | 0.22139246 |
| Frem3       | 11.3719314 | 0.44283797 | 0.42016047 | 1.05397342 | 0.29189509 | 0.58563546 |
| Pdxp        | 1785.06202 | 0.44269534 | 0.33019869 | 1.34069381 | 0.18001989 | 0.45863256 |
| Vat1l       | 12.1499011 | 0.44201101 | 0.43141997 | 1.02454925 | 0.30557592 | 0.6000014  |
| Aox1        | 94.4307012 | 0.44158636 | 0.34233303 | 1.28993208 | 0.19707424 | 0.48021826 |
| Gda         | 2.90398008 | 0.44101903 | 0.31266969 | 1.410495   | 0.15839357 | NA         |
| Gcm1        | 6.33047073 | 0.44032983 | 0.41008551 | 1.07375127 | 0.28293418 | 0.57530196 |
| Snord33     | 25.0558589 | 0.44030386 | 0.41046858 | 1.07268591 | 0.28341207 | 0.57580419 |
| 4931440F15F | 6.30088884 | 0.44020326 | 0.35648144 | 1.23485603 | 0.21688409 | 0.50437632 |
| Gm10190     | 5.22185146 | 0.44003537 | 0.40227001 | 1.09388064 | 0.27400733 | NA         |
| Trim6       | 20252.6438 | 0.43924663 | 0.23853736 | 1.84141649 | 0.06556055 | 0.25939598 |
| Shox2       | 7.94444705 | 0.43913363 | 0.42010216 | 1.04530201 | 0.29588341 | 0.59051371 |
| Zdhhc15     | 1871.74401 | 0.43906935 | 0.26343092 | 1.66673434 | 0.09556724 | 0.3230796  |
| Eef1a2      | 13.5984558 | 0.43885979 | 0.43117649 | 1.01781939 | 0.30876379 | 0.60336589 |
| Ii18        | 8.36242124 | 0.43878737 | 0.42264467 | 1.0381945  | 0.29917951 | 0.59389081 |
| Ubttd2      | 2384.83977 | 0.43871171 | 0.19720091 | 2.22469415 | 0.02610178 | 0.14613366 |
| Ywhag       | 42294.5053 | 0.43867694 | 0.20354271 | 2.15520833 | 0.03114554 | 0.16325438 |
| Ampd2       | 3211.62493 | 0.43859609 | 0.2145563  | 2.04420049 | 0.04093375 | 0.19383699 |
| 1110057K04F | 3976.60997 | 0.43843123 | 0.14678677 | 2.98685799 | 0.00281861 | 0.03133105 |
| Ucn         | 2.34405123 | 0.43821625 | 0.2956736  | 1.48209462 | 0.13831512 | NA         |
| Dusp6       | 383.558148 | 0.43817783 | 0.29663933 | 1.47714005 | 0.1396381  | 0.39955955 |
| Pag1        | 389.070755 | 0.43811479 | 0.25833207 | 1.69593653 | 0.0898979  | 0.31219345 |
| Tnfrsf13b   | 35.0720017 | 0.43788779 | 0.423323   | 1.03440585 | 0.30094647 | 0.59564809 |

|             |            |            |            |            |            |            |
|-------------|------------|------------|------------|------------|------------|------------|
| Foxc1       | 50.4474297 | 0.43782168 | 0.42637408 | 1.02684872 | 0.3044917  | 0.59938614 |
| Dgki        | 27.9597564 | 0.43774868 | 0.40108946 | 1.09139911 | 0.2750973  | 0.5675013  |
| Klf14       | 8.22844932 | 0.43740778 | 0.41730993 | 1.04816048 | 0.29456467 | 0.58901572 |
| Ptpn7       | 267.981006 | 0.43729006 | 0.28702629 | 1.52351919 | 0.12762886 | 0.38168394 |
| Zkscan14    | 358.327855 | 0.43715212 | 0.22683065 | 1.92721804 | 0.05395246 | 0.2301623  |
| Wnt3a       | 46.3971427 | 0.43708606 | 0.40496309 | 1.07932321 | 0.28044367 | 0.57248352 |
| Btn2a2      | 216.537854 | 0.43697125 | 0.3449595  | 1.26673204 | 0.20525112 | 0.4903111  |
| Xlr5b       | 409.403719 | 0.43690857 | 0.4290246  | 1.01837651 | 0.30849906 | 0.60292433 |
| A930006K02F | 17.6770005 | 0.43688866 | 0.42873544 | 1.0190169  | 0.30819494 | 0.60283181 |
| 1600002K03F | 345.971211 | 0.43681999 | 0.24540148 | 1.7800218  | 0.07507239 | 0.28025934 |
| Trappc13    | 7572.01363 | 0.43664024 | 0.19772089 | 2.20836678 | 0.02721872 | 0.15004546 |
| Masp1       | 3.44814609 | 0.43656518 | 0.3476825  | 1.25564323 | 0.20924535 | NA         |
| Casp8       | 342.704548 | 0.43654588 | 0.32418645 | 1.34658891 | 0.17811267 | 0.4556391  |
| Astl        | 4.68629912 | 0.43650017 | 0.39786126 | 1.09711654 | 0.27259045 | NA         |
| Cobll1      | 186.925217 | 0.43631709 | 0.40934452 | 1.0658921  | 0.28647242 | 0.57968137 |
| Tsc22d3     | 523.724828 | 0.436306   | 0.2840835  | 1.53583721 | 0.12457831 | 0.37712751 |
| Rab11a      | 6387.40113 | 0.43629857 | 0.21292536 | 2.04906817 | 0.04045545 | 0.19269956 |
| Nupr1l      | 63.7259665 | 0.43629159 | 0.41367797 | 1.0546648  | 0.29157865 | 0.58530265 |
| D330023K18I | 61.1009749 | 0.43612171 | 0.35058527 | 1.24398184 | 0.21350625 | 0.50028431 |
| Colq        | 10.9502494 | 0.43594471 | 0.43178213 | 1.00964046 | 0.31266758 | 0.60717951 |
| C1qtnf6     | 67.3501437 | 0.4358091  | 0.42465664 | 1.0262623  | 0.30476796 | 0.59961979 |
| Sh3bgr      | 23.29685   | 0.4357293  | 0.41684527 | 1.04530225 | 0.2958833  | 0.59051371 |
| Adrb1       | 20.0340471 | 0.43536585 | 0.42733602 | 1.01879044 | 0.30830246 | 0.60291798 |
| B4galt3     | 2123.46659 | 0.4353532  | 0.22017291 | 1.97732412 | 0.04800501 | 0.21427263 |
| Coq4        | 1071.96099 | 0.43437642 | 0.2299708  | 1.88883295 | 0.05891422 | 0.24308171 |
| Thap1       | 1142.07167 | 0.4340836  | 0.19143257 | 2.26755351 | 0.02335643 | 0.13649424 |
| 4930513N10I | 189.348246 | 0.43408062 | 0.28679929 | 1.51353447 | 0.13014395 | 0.38579272 |
| 3110021N24I | 4.88351544 | 0.43397791 | 0.40266694 | 1.07775898 | 0.28114133 | NA         |
| Gtf2h1      | 14313.1848 | 0.43369025 | 0.18541143 | 2.33906963 | 0.01933183 | 0.12083171 |
| Vwa2        | 42.1611059 | 0.43350457 | 0.37842285 | 1.14555603 | 0.2519789  | 0.54567942 |
| Rprd1b      | 4003.84232 | 0.43348317 | 0.20266758 | 2.13888756 | 0.03244478 | 0.16790307 |
| Kcnc3       | 661.335259 | 0.43334383 | 0.18707119 | 2.31646486 | 0.0205329  | 0.12581054 |
| Arxes2      | 1042.19387 | 0.43299068 | 0.28028042 | 1.5448481  | 0.12238301 | 0.37287974 |
| Dnase1l3    | 3.84043901 | 0.4327729  | 0.38068342 | 1.13683149 | 0.25560873 | NA         |
| Plcl2       | 1023.00746 | 0.43265608 | 0.31320943 | 1.38136351 | 0.16716722 | 0.44179059 |
| Xrcc1       | 9827.79237 | 0.43253904 | 0.21207569 | 2.03955033 | 0.04139513 | 0.19532548 |
| Ikzf3       | 15.8023053 | 0.43246633 | 0.43224277 | 1.00051722 | 0.31706027 | 0.6115864  |
| Itgb1bp2    | 40.7886588 | 0.43234159 | 0.39707993 | 1.08880244 | 0.27624102 | 0.56872206 |
| Slc22a3     | 2.37952621 | 0.43233122 | 0.31972739 | 1.352187   | 0.1763155  | NA         |
| 4930581F22F | 35.5215908 | 0.43224333 | 0.3799566  | 1.13761236 | 0.25528238 | 0.54828787 |
| Nr6a1       | 5164.13095 | 0.432195   | 0.34432603 | 1.2551912  | 0.20940936 | 0.4956659  |

|          |            |            |            |            |            |            |
|----------|------------|------------|------------|------------|------------|------------|
| Ankrd42  | 82.8075005 | 0.43218413 | 0.32024946 | 1.34952335 | 0.17716892 | 0.45464587 |
| Gm15055  | 361.780515 | 0.43196819 | 0.38552512 | 1.12046706 | 0.26251478 | 0.5549512  |
| Nptn     | 7157.13529 | 0.43189583 | 0.14686258 | 2.94081615 | 0.00327349 | 0.03479563 |
| Gm9920   | 15.0908987 | 0.43174436 | 0.42963262 | 1.00491521 | 0.31493768 | 0.6093449  |
| Sema3b   | 822.235526 | 0.4316569  | 0.38107719 | 1.13272823 | 0.2573284  | 0.55006377 |
| Gm5643   | 11.8197187 | 0.43154852 | 0.43178381 | 0.99945506 | 0.3175743  | 0.61159656 |
| Tmem29   | 827.627029 | 0.43109656 | 0.21389425 | 2.01546584 | 0.04385586 | 0.20213471 |
| Snord58b | 25.4806816 | 0.43100781 | 0.40096623 | 1.07492297 | 0.28240922 | 0.57481886 |
| Golga7b  | 21.9943477 | 0.43097788 | 0.43180298 | 0.99808916 | 0.31823612 | 0.61218332 |
| Fam83e   | 63.1335397 | 0.4309247  | 0.42956857 | 1.00315695 | 0.31578514 | 0.61014884 |
| Acat3    | 7.64455292 | 0.43086155 | 0.42404066 | 1.01608547 | 0.30958869 | 0.60444616 |
| Zfp668   | 593.341802 | 0.43065986 | 0.2308874  | 1.8652376  | 0.06214811 | 0.25121514 |
| Arf4     | 13910.0305 | 0.43040807 | 0.18563321 | 2.31859417 | 0.02041705 | 0.12559556 |
| Kirrel3  | 9.90215339 | 0.43016901 | 0.42883312 | 1.00311518 | 0.31580529 | 0.61014884 |
| Lgmn     | 10129.9962 | 0.42995962 | 0.22740744 | 1.89070166 | 0.05866418 | 0.242436   |
| Dnajb9   | 1292.97682 | 0.42995144 | 0.22627386 | 1.90013749 | 0.05741508 | 0.23881336 |
| Mon1a    | 469.881542 | 0.42994736 | 0.2736862  | 1.5709501  | 0.11619424 | 0.36215582 |
| Pcsk7    | 1087.8779  | 0.4296493  | 0.22887645 | 1.87721058 | 0.06048924 | 0.24741403 |
| Gsta2    | 82.7902132 | 0.42935641 | 0.41775857 | 1.02776208 | 0.30406176 | 0.59891886 |
| Itpka    | 2087.53778 | 0.42921547 | 0.23244899 | 1.84649313 | 0.06482064 | 0.25789153 |
| Cdk5     | 1981.84577 | 0.42882334 | 0.20557879 | 2.08593184 | 0.0369848  | 0.18247163 |
| Tnnt3    | 3.960457   | 0.42847326 | 0.35124114 | 1.21988345 | 0.22250906 | NA         |
| Unc80    | 248.561456 | 0.42836755 | 0.42106132 | 1.01735192 | 0.30898604 | 0.60364849 |
| Spin2d   | 19.0635291 | 0.42834842 | 0.42998579 | 0.99619205 | 0.31915684 | 0.61303091 |
| Tmem260  | 512.430856 | 0.42820958 | 0.31702013 | 1.35073309 | 0.17678095 | 0.45432499 |
| Marcksl1 | 23677.5628 | 0.42818536 | 0.1956744  | 2.18825436 | 0.02865108 | 0.15527195 |
| Ephb1    | 36.4664586 | 0.42801043 | 0.39177005 | 1.09250422 | 0.27461154 | 0.56715903 |
| Wdr78    | 92.9895823 | 0.42798099 | 0.383615   | 1.1156524  | 0.26457095 | 0.55625052 |
| Ypel5    | 3957.1599  | 0.42786285 | 0.22222673 | 1.92534377 | 0.05418636 | 0.23061725 |
| Bfsp2    | 9.76551414 | 0.42770477 | 0.41760481 | 1.02418545 | 0.30574769 | 0.60009099 |
| Man2a1   | 8057.01161 | 0.42756693 | 0.30280409 | 1.41202494 | 0.15794262 | 0.42791306 |
| Hcrtr1   | 10.510191  | 0.42750361 | 0.40803851 | 1.04770407 | 0.29477497 | 0.58928469 |
| Spaca6   | 70.3636034 | 0.42741611 | 0.33823428 | 1.2636688  | 0.20634893 | 0.49111298 |
| Hoxc5    | 80.0606101 | 0.4270995  | 0.39237795 | 1.08849008 | 0.27637882 | 0.5688904  |
| Sec61g   | 49.9807061 | 0.42701687 | 0.34982198 | 1.22066908 | 0.22221134 | 0.51090346 |
| Pln      | 2.04438413 | 0.42690215 | 0.29314263 | 1.456295   | 0.14531109 | NA         |
| Gpr75    | 133.245879 | 0.42686552 | 0.29401081 | 1.45187014 | 0.14653772 | 0.41074406 |
| Plekho2  | 1172.05519 | 0.42681096 | 0.23736589 | 1.79811411 | 0.07215893 | 0.27396081 |
| En1      | 16.5913418 | 0.42677311 | 0.42963891 | 0.99332974 | 0.32054929 | 0.61450469 |
| Gm16938  | 118.378454 | 0.42674996 | 0.33839409 | 1.26110347 | 0.20727157 | 0.49270563 |
| Fgfr1    | 6606.71532 | 0.42664199 | 0.25365497 | 1.68197768 | 0.09257317 | 0.31681456 |

|             |            |            |            |            |            |            |
|-------------|------------|------------|------------|------------|------------|------------|
| Uros        | 896.545449 | 0.42660464 | 0.18078094 | 2.35978769 | 0.0182854  | 0.11644398 |
| Gm16023     | 9.33085035 | 0.42650113 | 0.430841   | 0.98992699 | 0.32220981 | 0.61660582 |
| Emc9        | 263.947203 | 0.42642912 | 0.31517944 | 1.35297252 | 0.17606441 | 0.45375831 |
| Trim68      | 223.354804 | 0.42582275 | 0.29052828 | 1.46568432 | 0.14273431 | 0.40394199 |
| Fkbp14      | 678.251646 | 0.42572951 | 0.21728953 | 1.95927301 | 0.05008082 | 0.21981566 |
| Slc15a1     | 2025.49309 | 0.42571545 | 0.30915569 | 1.37702606 | 0.16850419 | 0.44336524 |
| A830052D11  | 1.99242316 | 0.42556598 | 0.29286177 | 1.45312919 | 0.14618789 | NA         |
| Zfp300      | 41.112389  | 0.42555429 | 0.3912937  | 1.08755723 | 0.27679062 | 0.56928593 |
| Oasl1       | 274.896314 | 0.42552216 | 0.33657716 | 1.26426331 | 0.20613553 | 0.49102568 |
| Cav1        | 4.76838845 | 0.42499791 | 0.3138169  | 1.35428627 | NA         | NA         |
| Kif26b      | 65.6435782 | 0.42494894 | 0.40538388 | 1.04826305 | 0.29451743 | 0.58899698 |
| Snx31       | 135.251388 | 0.42483631 | 0.29971923 | 1.41744765 | 0.15635209 | 0.42521829 |
| Nr1i3       | 30.8192246 | 0.42478324 | 0.42671734 | 0.9954675  | 0.31950895 | 0.61311496 |
| Pgrmc1      | 6523.94971 | 0.42434309 | 0.25588341 | 1.6583455  | 0.09724775 | 0.32598491 |
| Epha5       | 3.46615112 | 0.42428064 | 0.36090734 | 1.17559437 | 0.239757   | NA         |
| Arntl       | 2333.87961 | 0.4236773  | 0.20777548 | 2.03911114 | 0.04143894 | 0.19532548 |
| Tbx6        | 23.8830682 | 0.42291711 | 0.41275497 | 1.02462027 | 0.3055424  | 0.6000014  |
| Gabrg1      | 5.45017482 | 0.4227474  | 0.36573371 | 1.15588853 | 0.24772675 | NA         |
| BC064078    | 18.2384511 | 0.42268568 | 0.42025196 | 1.00579109 | 0.31451608 | 0.60909583 |
| Olfml2a     | 4.58037888 | 0.42223849 | 0.39311447 | 1.07408534 | 0.28278444 | NA         |
| Slc18a1     | 28.0085251 | 0.42217226 | 0.41016561 | 1.02927268 | 0.30335156 | 0.59850547 |
| Ino80dos    | 58.1356331 | 0.42216828 | 0.41776322 | 1.01054439 | 0.31223455 | 0.60664161 |
| Atp6v1g2    | 30.0964672 | 0.42209628 | 0.42933822 | 0.9831323  | 0.32554233 | 0.61911566 |
| Csl         | 14.3740157 | 0.42197456 | 0.4282778  | 0.98528234 | 0.3244854  | 0.61869452 |
| Socs3       | 5613.10951 | 0.42194158 | 0.20551085 | 2.05313528 | 0.04005946 | 0.19132821 |
| Cpn1        | 468.401631 | 0.4218906  | 0.37638752 | 1.12089423 | 0.26233289 | 0.55478597 |
| Ak7         | 1666.26345 | 0.42186352 | 0.43226841 | 0.97592956 | 0.32909937 | 0.62234394 |
| C730036E19F | 2.89150391 | 0.42172287 | 0.32895602 | 1.28200382 | 0.19984131 | NA         |
| Ccdc92      | 892.430251 | 0.42172124 | 0.23714042 | 1.77836086 | 0.07534461 | 0.28071011 |
| Smagp       | 1083.48739 | 0.4216173  | 0.32849236 | 1.28349195 | 0.19931978 | 0.48250548 |
| 3110007F17F | 3.20827084 | 0.42130427 | 0.37034804 | 1.13759013 | 0.25529167 | NA         |
| Itgb5       | 4741.23615 | 0.42129934 | 0.28924956 | 1.45652541 | 0.14524743 | 0.40845258 |
| Foxd4       | 3.4270437  | 0.4212486  | 0.33688664 | 1.25041644 | 0.21114746 | NA         |
| Mfsd10      | 4332.37591 | 0.42122338 | 0.21169085 | 1.98980436 | 0.04661249 | 0.20988317 |
| Zfp956      | 793.575747 | 0.42121033 | 0.19131737 | 2.20163142 | 0.02769135 | 0.15189709 |
| Sh3glb1     | 4310.59287 | 0.4210172  | 0.27011297 | 1.5586708  | 0.11907432 | 0.36689611 |
| Gm16515     | 3975.34917 | 0.42088752 | 0.22860751 | 1.8410923  | 0.06560803 | 0.25939598 |
| Gfod2       | 528.347778 | 0.42073781 | 0.21064659 | 1.99736355 | 0.0457857  | 0.20788715 |
| 1600002D24I | 8.62204092 | 0.42053946 | 0.41758186 | 1.00708267 | 0.31389505 | 0.60841899 |
| Prtg        | 918.301526 | 0.42038318 | 0.34320184 | 1.22488614 | 0.22061813 | 0.50895393 |
| Irf8        | 89.4329453 | 0.42028834 | 0.43016578 | 0.97703807 | 0.32855031 | 0.62221988 |

|             |            |            |            |            |            |            |
|-------------|------------|------------|------------|------------|------------|------------|
| Gale        | 1678.57378 | 0.42026873 | 0.21948323 | 1.91481022 | 0.05551671 | 0.23447593 |
| Cuta        | 3174.4366  | 0.42018332 | 0.21675328 | 1.93853265 | 0.05255827 | 0.22676332 |
| 2810459M11  | 62.3685469 | 0.41989902 | 0.43147191 | 0.97317812 | 0.33046479 | 0.62369343 |
| Rsrp1       | 11261.2269 | 0.41974305 | 0.26696473 | 1.57227906 | 0.11588585 | 0.3616578  |
| Zfyve9      | 1847.12313 | 0.41960558 | 0.17335645 | 2.42047857 | 0.01550009 | 0.10358485 |
| Jam2        | 28892.947  | 0.41940529 | 0.16819735 | 2.4935309  | 0.01264796 | 0.09030688 |
| A930012L18f | 3.66404787 | 0.41921005 | 0.35736921 | 1.17304468 | 0.24077789 | NA         |
| Meis2       | 3016.90998 | 0.41876489 | 0.31889513 | 1.31317431 | 0.18912422 | 0.47064662 |
| Scel        | 5.25906009 | 0.41875976 | 0.408012   | 1.0263418  | 0.3047305  | NA         |
| Frmd6       | 2403.7873  | 0.41873845 | 0.1843559  | 2.27135908 | 0.02312525 | 0.13585975 |
| 6230400D17f | 32.3357882 | 0.41864004 | 0.42476408 | 0.98558249 | 0.32433803 | 0.618534   |
| Gm10696     | 3.44267834 | 0.41846845 | 0.32254632 | 1.29739022 | 0.19449696 | NA         |
| Zfp784      | 50.3340285 | 0.4183622  | 0.35543181 | 1.17705334 | 0.23917422 | 0.53119084 |
| Pdc         | 6.92096766 | 0.41825355 | 0.40789564 | 1.02539352 | 0.30517754 | 0.59971168 |
| Kcnmb4      | 8.17278945 | 0.41800894 | 0.42833768 | 0.97588646 | 0.32912073 | 0.62234394 |
| Duox1       | 244.155607 | 0.41798343 | 0.36584211 | 1.14252411 | 0.25323623 | 0.54616042 |
| Lhx6        | 142.828248 | 0.41786678 | 0.35028872 | 1.19292102 | 0.2329003  | 0.52452319 |
| Atg13       | 6487.10181 | 0.41768756 | 0.24358132 | 1.71477667 | 0.08638618 | 0.30559406 |
| 4930591A17f | 497.492266 | 0.41734498 | 0.40171021 | 1.03892051 | 0.29884171 | 0.59352329 |
| Mrap        | 21.6142112 | 0.41692443 | 0.43140895 | 0.9664251  | 0.33383151 | 0.62713382 |
| Zfp213      | 1023.65041 | 0.41644936 | 0.28114299 | 1.48127242 | 0.13853399 | 0.39784712 |
| Pcgf5       | 778.767471 | 0.41644187 | 0.29713297 | 1.4015337  | 0.16105454 | 0.43209007 |
| Ercc4       | 2512.82469 | 0.41602257 | 0.21338571 | 1.94962715 | 0.05122057 | 0.22277806 |
| Fam53a      | 2614.75371 | 0.4158219  | 0.17135755 | 2.42663306 | 0.01523966 | 0.10263148 |
| Ptpla       | 277.006926 | 0.41570124 | 0.26045797 | 1.5960396  | 0.11047995 | 0.35123019 |
| Cetn1       | 2.76913315 | 0.41550139 | 0.32639586 | 1.27299835 | 0.20301863 | NA         |
| Ubald1      | 1339.59005 | 0.41528241 | 0.19518083 | 2.12768036 | 0.03336359 | 0.17089501 |
| Lama3       | 2467.80011 | 0.41472514 | 0.4311008  | 0.96201432 | 0.33604241 | 0.62870495 |
| 4930451G09f | 32.4730655 | 0.41470122 | 0.39116353 | 1.06017352 | 0.28906566 | 0.58221217 |
| Hras        | 2987.28306 | 0.41459347 | 0.20233537 | 2.04904097 | 0.04045811 | 0.19269956 |
| Ttll7       | 22.495458  | 0.41434504 | 0.42087942 | 0.98447446 | 0.32488228 | 0.6188465  |
| Zfp319      | 560.535715 | 0.41418629 | 0.25082054 | 1.65132524 | 0.09867218 | 0.32864663 |
| A330035P11f | 59.079559  | 0.41409511 | 0.33820725 | 1.22438271 | 0.22080789 | 0.50898556 |
| Htra2       | 2758.25329 | 0.41398042 | 0.19207395 | 2.15531791 | 0.03113697 | 0.16325438 |
| Dach1       | 4.48717145 | 0.41378474 | 0.37333022 | 1.10836123 | 0.26770584 | NA         |
| Thap6       | 848.603902 | 0.41361967 | 0.23971604 | 1.72545678 | 0.08444519 | 0.30140167 |
| Dcun1d3     | 2388.71548 | 0.41356455 | 0.19725958 | 2.09654983 | 0.03603344 | 0.18008508 |
| Gm11744     | 88.8810601 | 0.41351798 | 0.36125927 | 1.14465709 | 0.25235123 | 0.54598821 |
| Acaa1a      | 2378.87603 | 0.41347417 | 0.1918468  | 2.15523098 | 0.03114376 | 0.16325438 |
| Lman2l      | 1103.20392 | 0.41335397 | 0.20773758 | 1.9897891  | 0.04661417 | 0.20988317 |
| Dnajc5      | 7417.55809 | 0.41329248 | 0.17199759 | 2.40289689 | 0.01626577 | 0.10742776 |

|             |            |            |            |            |            |            |
|-------------|------------|------------|------------|------------|------------|------------|
| Wdr81       | 1222.69781 | 0.41311015 | 0.30017392 | 1.37623597 | 0.16874859 | 0.44357832 |
| Trim47      | 204.604868 | 0.4129896  | 0.31282151 | 1.32020844 | 0.18676544 | 0.46781595 |
| Gphn        | 1204.60169 | 0.4127876  | 0.22811417 | 1.80956584 | 0.07036314 | 0.27004374 |
| 1700047M11  | 8.71748037 | 0.41277284 | 0.42769764 | 0.96510432 | 0.33449256 | 0.62758652 |
| Tmem117     | 939.08511  | 0.4125731  | 0.38796872 | 1.06341847 | 0.28759222 | 0.58105062 |
| Hkdc1       | 40.2646215 | 0.41241196 | 0.42714599 | 0.96550586 | 0.3342915  | 0.62746736 |
| Clip1       | 2157.88608 | 0.41210687 | 0.17773021 | 2.31872155 | 0.02041014 | 0.12559556 |
| Myoz1       | 8.36479399 | 0.41179498 | 0.41839415 | 0.98422738 | 0.32500373 | 0.6188465  |
| Smim3       | 404.800536 | 0.41170222 | 0.26132419 | 1.57544623 | 0.11515348 | 0.36009487 |
| Slc35g3     | 64.0195968 | 0.41169888 | 0.35926193 | 1.14595745 | 0.25181276 | 0.54548505 |
| Pak1        | 3396.05342 | 0.41160245 | 0.17684271 | 2.32750589 | 0.01993836 | 0.12367825 |
| Uchl5       | 6181.57899 | 0.41134747 | 0.20271069 | 2.02923425 | 0.04243444 | 0.19822707 |
| Xlr4a       | 807.121857 | 0.41134148 | 0.23948477 | 1.71761018 | 0.08586774 | 0.30438324 |
| Susd4       | 325.802922 | 0.41104134 | 0.30380417 | 1.35298125 | 0.17606162 | 0.45375831 |
| Rtkn        | 2752.44579 | 0.41090704 | 0.21750945 | 1.88914568 | 0.05887231 | 0.24297328 |
| Sec63       | 4248.21316 | 0.41086196 | 0.18935719 | 2.16977218 | 0.03002411 | 0.15957106 |
| Bcmo1       | 16.2603371 | 0.41067299 | 0.43168846 | 0.95131797 | 0.34144299 | 0.63476149 |
| Rhod        | 588.481453 | 0.41066126 | 0.24694744 | 1.66295002 | 0.09632244 | 0.32415284 |
| Slc25a21    | 4.01200512 | 0.41052765 | 0.36694921 | 1.11875879 | 0.26324306 | NA         |
| Shh         | 9.6061407  | 0.4105273  | 0.42591311 | 0.9638757  | 0.33510825 | 0.62800397 |
| 3110001I22R | 623.803892 | 0.41052515 | 0.20886122 | 1.96554034 | 0.04935173 | 0.21783943 |
| Prss42      | 316.31157  | 0.41034775 | 0.3953683  | 1.03788732 | 0.29932252 | 0.59404542 |
| Crtc2       | 1396.85475 | 0.41003776 | 0.20927006 | 1.9593713  | 0.05006932 | 0.21981566 |
| Itga11      | 10.0169371 | 0.41003262 | 0.4067399  | 1.00809538 | 0.31340868 | 0.60787966 |
| Herpud2     | 1766.2097  | 0.40998179 | 0.18792265 | 2.18165184 | 0.02913524 | 0.156451   |
| Pramef8     | 1665.16472 | 0.40991746 | 0.23512389 | 1.74341049 | 0.08126194 | 0.29463847 |
| Lrrc8d      | 5188.27031 | 0.40991161 | 0.23009185 | 1.78151294 | 0.07482869 | 0.27986075 |
| Gm6524      | 8.67095412 | 0.40986425 | 0.42546595 | 0.96333032 | 0.33538178 | 0.62800397 |
| Aldh7a1     | 7772.74783 | 0.4098126  | 0.21701744 | 1.88838557 | 0.05897421 | 0.24326469 |
| Ccser1      | 58.9119613 | 0.40975178 | 0.41398103 | 0.98978395 | 0.32227973 | 0.61660582 |
| Pigr        | 3.97024414 | 0.40968426 | 0.34142237 | 1.19993385 | 0.23016503 | NA         |
| Jund        | 4395.28187 | 0.40948996 | 0.26905079 | 1.52198019 | 0.12801404 | 0.38211884 |
| H2-M5       | 2633.177   | 0.40948765 | 0.27183535 | 1.50638116 | 0.13196935 | 0.38846402 |
| Sema4c      | 306.427417 | 0.40947897 | 0.31316467 | 1.30755161 | 0.19102544 | 0.47327941 |
| Gtf2ird2    | 356.594193 | 0.40946393 | 0.24773368 | 1.65283918 | 0.0983636  | 0.32810942 |
| Prox2       | 20.9275201 | 0.40943583 | 0.42171822 | 0.97087536 | 0.33161035 | 0.62484824 |
| Shisa4      | 167.351183 | 0.40927963 | 0.40068144 | 1.02145893 | 0.30703706 | 0.6015791  |
| Sirt4       | 565.754693 | 0.40918751 | 0.26333281 | 1.5538797  | 0.12021312 | 0.36901616 |
| Zfp457      | 12.9232742 | 0.40913215 | 0.43102883 | 0.94919904 | 0.34251939 | 0.63623018 |
| Spata3      | 2.37760158 | 0.4090876  | 0.33541921 | 1.21963081 | 0.22260486 | NA         |
| Bloc1s6     | 1678.79068 | 0.40907262 | 0.18172514 | 2.25105127 | 0.02438229 | 0.14032901 |

|             |            |            |            |            |            |            |
|-------------|------------|------------|------------|------------|------------|------------|
| Spag8       | 12.7006043 | 0.40896511 | 0.43223002 | 0.9461747  | 0.34405949 | 0.63732661 |
| Tmem18      | 2575.77022 | 0.40886604 | 0.16599028 | 2.46319258 | 0.01377059 | 0.09560111 |
| 0610009L18F | 24.3705194 | 0.40877885 | 0.41927658 | 0.97496228 | 0.32957897 | 0.62303576 |
| Crybb3      | 67.4910537 | 0.40847044 | 0.39635201 | 1.03057493 | 0.3027402  | 0.59790613 |
| Cacng7      | 246.166132 | 0.40845428 | 0.36235695 | 1.12721526 | 0.25965148 | 0.55169288 |
| C430002E04F | 855.665581 | 0.40844231 | 0.26361771 | 1.54937355 | 0.12129195 | 0.37070775 |
| 1700028J19R | 39.8124458 | 0.40842938 | 0.37273999 | 1.09574875 | 0.27318874 | 0.56626801 |
| Dio2        | 4.38721077 | 0.40799191 | 0.36191882 | 1.12730227 | 0.2596147  | NA         |
| 2310034O05I | 19.2983831 | 0.40789726 | 0.41557297 | 0.98152982 | 0.32633154 | 0.61957682 |
| Rnf185      | 3695.33037 | 0.40789354 | 0.18737471 | 2.17688677 | 0.02948902 | 0.1574177  |
| Nrip3       | 74.7853309 | 0.40775083 | 0.36151164 | 1.12790511 | 0.25935999 | 0.55144791 |
| Sp110       | 17.9152518 | 0.40770974 | 0.42441879 | 0.96063074 | 0.33673787 | 0.62940031 |
| Parp14      | 386.822394 | 0.40768878 | 0.36163769 | 1.12734041 | 0.25959858 | 0.55165586 |
| Pdia3       | 53570.8498 | 0.4076091  | 0.19104637 | 2.13356104 | 0.03287873 | 0.16924764 |
| Usmg5       | 3903.72284 | 0.40759227 | 0.21881327 | 1.86274017 | 0.06249883 | 0.25214118 |
| C920009B18f | 9.48376947 | 0.40737129 | 0.40739328 | 0.999946   | 0.31733664 | 0.61159656 |
| Esr2        | 7.09807166 | 0.4073373  | 0.42280884 | 0.96340772 | 0.33534296 | 0.62800397 |
| Ptges3l     | 137.945264 | 0.40727983 | 0.27677554 | 1.47151669 | 0.14115144 | 0.40171844 |
| 1700034P13F | 24.5185457 | 0.40696934 | 0.40377507 | 1.00791099 | 0.31349719 | 0.60787966 |
| Klf10       | 9162.83546 | 0.40652455 | 0.1847352  | 2.20057976 | 0.02776579 | 0.15193025 |
| Ubash3b     | 84.3237397 | 0.40651552 | 0.42216362 | 0.96293356 | 0.33558086 | 0.62821934 |
| Ccl27a      | 143.837263 | 0.40644574 | 0.29486716 | 1.37840285 | 0.16807894 | 0.44308872 |
| 9130015A21f | 2.21036448 | 0.40635979 | 0.31220225 | 1.30159149 | 0.19305607 | NA         |
| Spock1      | 89.4566127 | 0.40633778 | 0.35264664 | 1.15225195 | 0.24921756 | 0.54272262 |
| Coprs       | 3532.98859 | 0.4061442  | 0.17944397 | 2.26334826 | 0.02361423 | 0.13751903 |
| Dnal1       | 870.787472 | 0.40604152 | 0.22671749 | 1.79095805 | 0.07330003 | 0.27633666 |
| Zcchc13     | 2.84626744 | 0.40600195 | 0.34745737 | 1.16849429 | 0.24260744 | NA         |
| Apc2        | 36.4057806 | 0.40589582 | 0.41160835 | 0.98612145 | 0.32407352 | 0.618534   |
| Vtcn1       | 2.22053862 | 0.40580853 | 0.30912387 | 1.31276994 | 0.18926048 | NA         |
| Gm10857     | 9.71928444 | 0.40576452 | 0.40689021 | 0.99723343 | 0.31865122 | 0.6124515  |
| Zfp618      | 20.3040991 | 0.40567997 | 0.42710012 | 0.94984747 | 0.34218976 | 0.63584574 |
| Ctf2        | 7.83770787 | 0.40564031 | 0.38010148 | 1.06718951 | 0.28588627 | 0.57903326 |
| Gm2061      | 53.7530279 | 0.40560802 | 0.35788171 | 1.13335777 | 0.25706404 | 0.55002791 |
| Nwd2        | 9.25982239 | 0.40557494 | 0.38588684 | 1.05102041 | 0.29324922 | 0.5870231  |
| Il6ra       | 921.708769 | 0.4054989  | 0.29724147 | 1.36420703 | 0.17250242 | 0.44946602 |
| Ntn3        | 89.733227  | 0.40526832 | 0.32540173 | 1.24543996 | 0.21297007 | 0.4996189  |
| 4930467K11F | 2.67696496 | 0.40523534 | 0.35768867 | 1.13292753 | 0.25724469 | NA         |
| Tpp1        | 7642.75628 | 0.40519063 | 0.16048507 | 2.52478702 | 0.01157684 | 0.08512127 |
| Eps8        | 3428.66549 | 0.40512231 | 0.21901598 | 1.8497386  | 0.06435123 | 0.25681792 |
| Rab43       | 814.44731  | 0.40505545 | 0.22555899 | 1.79578498 | 0.07252872 | 0.27462725 |
| Scrn3       | 2273.35818 | 0.40498783 | 0.2268508  | 1.78526076 | 0.07421903 | 0.27838402 |

|             |            |            |            |            |            |            |
|-------------|------------|------------|------------|------------|------------|------------|
| Olfr1349    | 7.63503696 | 0.40496284 | 0.42022017 | 0.96369205 | 0.33520034 | 0.62800397 |
| Lepre1      | 5051.74082 | 0.40483761 | 0.19572015 | 2.06845136 | 0.0385976  | 0.18763091 |
| Zswim6      | 1081.66438 | 0.4048316  | 0.2705458  | 1.49635144 | 0.1345621  | 0.39216176 |
| Rbm18       | 3086.5138  | 0.40482857 | 0.15467144 | 2.61734528 | 0.00886167 | 0.07126008 |
| Gm19710     | 3.98169417 | 0.40481019 | 0.3883237  | 1.04245552 | 0.29720054 | NA         |
| Sos2        | 1427.01277 | 0.40410572 | 0.26416307 | 1.52975855 | 0.1260765  | 0.37900942 |
| Pank1       | 3638.1037  | 0.40387799 | 0.19872146 | 2.03238236 | 0.04211496 | 0.19725327 |
| Lcn9        | 2.1990714  | 0.40377163 | 0.30874993 | 1.30776269 | 0.19095381 | NA         |
| Ddit4       | 6589.83173 | 0.40363677 | 0.23012158 | 1.75401531 | 0.07942788 | 0.29073126 |
| Slc6a2      | 2.22253692 | 0.40362903 | 0.31361769 | 1.28700979 | 0.19809088 | NA         |
| Cyp2ab1     | 125.497835 | 0.40332562 | 0.32935921 | 1.22457673 | 0.22073474 | 0.50898556 |
| Dnm2        | 7629.26858 | 0.40306531 | 0.18099117 | 2.22698883 | 0.02594802 | 0.1457795  |
| Ttc34       | 34.1179893 | 0.40305878 | 0.41373178 | 0.97420309 | 0.32995571 | 0.6233922  |
| Tstd1       | 112.595204 | 0.40298651 | 0.3282805  | 1.22756761 | 0.21960933 | 0.50805484 |
| Cdk14       | 43.7981509 | 0.40257441 | 0.43134021 | 0.93331063 | 0.35065961 | 0.64260047 |
| AY358078    | 15.9688142 | 0.40221934 | 0.43064272 | 0.93399776 | 0.35030505 | 0.64217774 |
| 1700049E22F | 25.0759872 | 0.40220386 | 0.41997733 | 0.95767994 | 0.33822418 | 0.63149528 |
| Nkx1-1      | 4.85264431 | 0.40185984 | 0.39673385 | 1.01292047 | 0.31109815 | NA         |
| AV320801    | 7.14224739 | 0.40179937 | 0.41787099 | 0.96153929 | 0.33628108 | 0.62900013 |
| Fmnl1       | 519.525259 | 0.40173694 | 0.26090126 | 1.53980451 | 0.12360801 | 0.37543519 |
| Pard3       | 5753.79281 | 0.40166466 | 0.21958413 | 1.82920624 | 0.06736872 | 0.26339085 |
| Hspa2       | 634.59765  | 0.40155434 | 0.23573876 | 1.70338698 | 0.08849567 | 0.30976524 |
| Medag       | 6.44375453 | 0.40146801 | 0.37809543 | 1.06181662 | 0.28831895 | 0.5819794  |
| Pter        | 852.507303 | 0.4012014  | 0.27836968 | 1.44125395 | 0.14951295 | 0.41519213 |
| C330046G13I | 677.097004 | 0.40115935 | 0.27221425 | 1.47368975 | 0.14056514 | 0.40079365 |
| Renbp       | 6972.27314 | 0.40114889 | 0.1736429  | 2.31019464 | 0.02087738 | 0.1275193  |
| Nynrin      | 4539.31437 | 0.40112745 | 0.3578194  | 1.12103327 | 0.2622737  | 0.55478597 |
| Bbx         | 2575.39341 | 0.40108255 | 0.26754362 | 1.49912956 | 0.13384003 | 0.39101    |
| Ocstamp     | 12.5347263 | 0.40094993 | 0.43226899 | 0.92754727 | 0.35364246 | 0.64520848 |
| Xlr5c       | 338.517149 | 0.40070849 | 0.42626958 | 0.94003538 | 0.34719941 | 0.63965147 |
| Tgm2        | 1910.13742 | 0.40059303 | 0.34369187 | 1.16555866 | 0.24379293 | 0.53593778 |
| E030024N20I | 3.51103001 | 0.40053937 | 0.3770985  | 1.06216115 | 0.28816253 | NA         |
| Pknox2      | 1222.77371 | 0.40041126 | 0.43217592 | 0.92650063 | 0.35418587 | 0.64571447 |
| Fam131a     | 103.865944 | 0.40028192 | 0.3264186  | 1.22628406 | 0.2200918  | 0.50864133 |
| Cdc5l       | 22320.6816 | 0.40017211 | 0.15981749 | 2.50393193 | 0.01228217 | 0.08860542 |
| Mboat7      | 2758.90386 | 0.40010632 | 0.16410081 | 2.43817394 | 0.01476167 | 0.10047016 |
| Grm5        | 2.02820186 | 0.40009344 | 0.28580875 | 1.39986423 | 0.16155398 | NA         |
| Capn2       | 1001.78692 | 0.40006709 | 0.31061837 | 1.28796983 | 0.19775647 | 0.48093412 |
| Trim16      | 499.401488 | 0.40001556 | 0.30985152 | 1.29099111 | 0.19670676 | 0.47976582 |
| 4930429B21F | 214.994517 | 0.39956443 | 0.36177448 | 1.10445722 | 0.26939485 | 0.5624056  |
| Gripap1     | 1077.49518 | 0.39938688 | 0.20699327 | 1.92946799 | 0.05367279 | 0.22973636 |



|          |            |            |            |            |            |            |
|----------|------------|------------|------------|------------|------------|------------|
| Tdo2     | 4.44732778 | 0.3993836  | 0.32269381 | 1.23765499 | NA         | NA         |
| Asic1    | 723.796662 | 0.39908652 | 0.21565915 | 1.85054294 | 0.06423534 | 0.25666076 |
| Acad12   | 252.174687 | 0.39895667 | 0.22932759 | 1.7396802  | 0.08191519 | 0.29593522 |
| Fosb     | 24.5671473 | 0.39886502 | 0.43167306 | 0.92399795 | 0.35548738 | 0.64710105 |
| Tmem51   | 1532.74726 | 0.39872747 | 0.23882632 | 1.669529   | 0.09501259 | 0.32183418 |
| Ccdc102a | 355.22265  | 0.39856161 | 0.23641109 | 1.68588373 | 0.0918182  | 0.31542255 |
| Fstl1    | 4919.61759 | 0.3985134  | 0.35221009 | 1.13146502 | 0.25785942 | 0.55029118 |
| Hoxa6    | 3.82825402 | 0.39845777 | 0.36368448 | 1.09561391 | 0.27324777 | NA         |
| Jtb      | 2769.96969 | 0.39812368 | 0.19529756 | 2.03854922 | 0.04149504 | 0.19544364 |
| Pcdhga8  | 32.4349678 | 0.39810583 | 0.42603535 | 0.93444319 | 0.35007533 | 0.64198366 |
| Abcb5    | 15.9880106 | 0.39807805 | 0.43130976 | 0.92295165 | 0.3560324  | 0.64764054 |
| Paqr8    | 1860.35291 | 0.39800803 | 0.25897939 | 1.53683284 | 0.12433425 | 0.37653786 |
| Leprel4  | 382.314372 | 0.39795257 | 0.28885337 | 1.37769753 | 0.16829669 | 0.44322322 |
| Usp17la  | 48.8330247 | 0.39777458 | 0.41950669 | 0.94819606 | 0.34302965 | 0.63670595 |
| Lrrc9    | 220.350618 | 0.39766218 | 0.38102014 | 1.04367759 | 0.29663458 | 0.59122008 |
| Fhl1     | 3257.51965 | 0.39759939 | 0.33741724 | 1.17836119 | 0.23865264 | 0.53071461 |
| Lmtk3    | 659.845144 | 0.39745738 | 0.22257783 | 1.78570066 | 0.07414774 | 0.27825084 |
| Gopc     | 2151.81648 | 0.39742308 | 0.21006375 | 1.89191654 | 0.0585021  | 0.24189476 |
| Hoxc11   | 15.5938643 | 0.39741737 | 0.43032461 | 0.92352926 | 0.35573146 | 0.64739379 |
| Popdc3   | 77.7650454 | 0.39718453 | 0.42504422 | 0.9344546  | 0.35006944 | 0.64198366 |
| Mfap3l   | 163.09815  | 0.39714505 | 0.38535649 | 1.03059131 | 0.30273251 | 0.59790613 |
| Mesdc1   | 2878.44587 | 0.3971267  | 0.24444721 | 1.62459088 | 0.10424976 | 0.33956461 |
| Fam65c   | 5.33851186 | 0.39700271 | 0.40519321 | 0.97978617 | 0.32719168 | NA         |
| Gnb3     | 3.47253662 | 0.39694948 | 0.35282353 | 1.1250652  | 0.2605614  | NA         |
| Tsnax    | 4221.90658 | 0.39689346 | 0.19988846 | 1.98557464 | 0.04708058 | 0.21117682 |
| Gm595    | 9.86837591 | 0.39666032 | 0.42625894 | 0.93056187 | 0.35208024 | 0.64425364 |
| Stmn3    | 341.6489   | 0.39663027 | 0.28694867 | 1.3822342  | 0.1668998  | 0.44143393 |
| Stat3    | 9595.22292 | 0.39659092 | 0.2294192  | 1.72867365 | 0.08386752 | 0.2998942  |
| Wars2    | 811.970651 | 0.39658936 | 0.1987672  | 1.99524553 | 0.04601611 | 0.20850713 |
| Nek5     | 94.1127026 | 0.39643339 | 0.33437734 | 1.1855869  | 0.23578548 | 0.52758273 |
| Zfp612   | 490.93093  | 0.39637758 | 0.21492104 | 1.84429395 | 0.06514031 | 0.2584176  |
| Fancc    | 2091.98232 | 0.3963671  | 0.20733117 | 1.91175841 | 0.05590719 | 0.23548556 |
| Heyl     | 2.20822544 | 0.39630571 | 0.31160162 | 1.27183456 | 0.20343191 | NA         |
| Saysd1   | 352.363746 | 0.39597191 | 0.25515631 | 1.5518797  | 0.12069101 | 0.36940975 |
| Mir3473d | 3.07528743 | 0.39586409 | 0.3483678  | 1.13633951 | 0.2558145  | NA         |
| Pcsk5    | 50.8043778 | 0.39564227 | 0.43082652 | 0.91833314 | 0.35844448 | 0.64959011 |
| Pdf      | 1879.50707 | 0.3956019  | 0.19332731 | 2.04628053 | 0.04072878 | 0.19342449 |
| Aqp6     | 16.0221917 | 0.39523235 | 0.43197603 | 0.91494046 | 0.36022289 | 0.65122369 |
| Ttc21b   | 540.733257 | 0.39505944 | 0.26814141 | 1.47332497 | 0.14066343 | 0.40100037 |
| Zfp385a  | 1948.83075 | 0.39494087 | 0.24155264 | 1.63500953 | 0.10204705 | 0.33556847 |
| Nfkbiz   | 293.766939 | 0.39473046 | 0.22990417 | 1.71693473 | 0.0859911  | 0.3046122  |

|             |            |            |            |            |            |            |
|-------------|------------|------------|------------|------------|------------|------------|
| Dpcd        | 1188.24422 | 0.39463479 | 0.20954551 | 1.88328914 | 0.05966119 | 0.24522196 |
| Gm6548      | 819.626163 | 0.39441421 | 0.1883598  | 2.09394048 | 0.03626528 | 0.18058504 |
| Scarna13    | 7.69569564 | 0.39429558 | 0.4245702  | 0.9286935  | 0.35304795 | 0.64466039 |
| Adig        | 2.18312578 | 0.39378057 | 0.31115738 | 1.26553503 | 0.2056796  | NA         |
| Defb23      | 2.80647891 | 0.39344588 | 0.34684746 | 1.13434845 | 0.25664841 | NA         |
| Cpt1c       | 2081.6804  | 0.39340209 | 0.17719458 | 2.22017004 | 0.02640723 | 0.14687367 |
| Gnai1       | 1710.92493 | 0.39339142 | 0.28972802 | 1.35779558 | 0.17452856 | 0.45195232 |
| 2410114N07I | 25.6130618 | 0.39244691 | 0.40501361 | 0.96897216 | 0.33255908 | 0.62583232 |
| Atg10       | 386.043083 | 0.39229869 | 0.30093912 | 1.30358154 | 0.1923763  | 0.4751259  |
| Nek6        | 2332.54663 | 0.39226943 | 0.24887132 | 1.57619382 | 0.11498114 | 0.35980159 |
| Ap1m2       | 896.008901 | 0.39224467 | 0.34877029 | 1.12465047 | 0.26073718 | 0.55280269 |
| Gm15417     | 47.529027  | 0.39209753 | 0.35641558 | 1.10011334 | 0.27128274 | 0.56486131 |
| Arf3        | 9222.52766 | 0.39164618 | 0.20723766 | 1.88984081 | 0.05877925 | 0.2426967  |
| Snora41     | 115.758028 | 0.39147413 | 0.34703311 | 1.12805989 | 0.25929463 | 0.55144791 |
| Cutal       | 16.0464725 | 0.39142754 | 0.430654   | 0.9089142  | 0.36339542 | 0.65367309 |
| Sdk2        | 80.1012287 | 0.39138307 | 0.33769297 | 1.1589909  | 0.2464599  | 0.53951265 |
| C2cd3       | 2919.79447 | 0.39136132 | 0.23361484 | 1.67524165 | 0.09388683 | 0.31913313 |
| A730017L22F | 25.8139062 | 0.39128613 | 0.41285459 | 0.94775773 | 0.3432528  | 0.63670595 |
| Lin7b       | 94.5824491 | 0.39125429 | 0.37130447 | 1.05372902 | 0.292007   | 0.58578442 |
| Uvrag       | 2277.48167 | 0.39115552 | 0.1954738  | 2.00106367 | 0.04538553 | 0.20673414 |
| Plxdc2      | 459.704772 | 0.39105652 | 0.40149947 | 0.97399012 | 0.33006144 | 0.62344049 |
| Adam3       | 7.01829988 | 0.39087783 | 0.41076867 | 0.95157654 | 0.34131178 | 0.63466932 |
| Adamts5     | 5.92015677 | 0.39056502 | 0.29913385 | 1.30565305 | NA         | NA         |
| Zp2         | 7.42579932 | 0.39037413 | 0.39173351 | 0.99652985 | 0.31899277 | 0.61284294 |
| Bend7       | 273.396666 | 0.39014713 | 0.29059312 | 1.342589   | 0.1794051  | 0.4575904  |
| Rtn3        | 13135.1588 | 0.39007244 | 0.15432269 | 2.52764149 | 0.01148315 | 0.08472551 |
| Zfyve16     | 1220.98272 | 0.39004455 | 0.27538062 | 1.41638344 | 0.15666327 | 0.4258251  |
| Ppef2       | 154.760253 | 0.38994016 | 0.29434636 | 1.32476639 | 0.18524865 | 0.46588862 |
| Echdc1      | 1409.32442 | 0.38975041 | 0.22465006 | 1.73492233 | 0.08275456 | 0.29798916 |
| Hist2h2be   | 65.8502483 | 0.38971464 | 0.35608182 | 1.0944525  | 0.27375657 | 0.56667239 |
| Fyb         | 4.22076372 | 0.38963865 | 0.37899665 | 1.0280794  | 0.30391248 | NA         |
| Dleu7       | 171.623414 | 0.38962536 | 0.40937858 | 0.95174829 | 0.34122465 | 0.63465908 |
| Sfxn4       | 199.450499 | 0.38917636 | 0.27658543 | 1.40707473 | 0.15940523 | 0.43021707 |
| Tbkbp1      | 1659.52957 | 0.38891978 | 0.24527372 | 1.58565612 | 0.11281734 | 0.35572231 |
| Timd2       | 3.7996723  | 0.38890683 | 0.3594975  | 1.08180677 | 0.2793384  | NA         |
| Spag16      | 140.922253 | 0.38877049 | 0.37287105 | 1.04264058 | 0.29711479 | 0.59143953 |
| Vdr         | 215.065524 | 0.38834515 | 0.40523011 | 0.95833241 | 0.33789517 | 0.6311083  |
| Mrps21      | 1527.35076 | 0.38830624 | 0.24188369 | 1.6053428  | 0.10841839 | 0.34791876 |
| Lurap1      | 218.892437 | 0.38810029 | 0.28545573 | 1.35958134 | 0.17396245 | 0.45118246 |
| Zfp160      | 1746.35715 | 0.38786729 | 0.19415951 | 1.99767338 | 0.04575208 | 0.20779516 |
| Fam120b     | 963.721682 | 0.38771532 | 0.17285727 | 2.24297954 | 0.02489813 | 0.14219276 |

|             |            |            |            |            |            |            |
|-------------|------------|------------|------------|------------|------------|------------|
| Cebpb       | 276.05903  | 0.38769833 | 0.31967678 | 1.21278227 | 0.22521308 | 0.51458839 |
| Ezr         | 29932.207  | 0.3876113  | 0.20979397 | 1.84758074 | 0.06466302 | 0.25757546 |
| Tmem88b     | 8.52150148 | 0.38747931 | 0.42489322 | 0.91194517 | 0.36179758 | 0.65254528 |
| Cmpk1       | 7366.07554 | 0.38720504 | 0.18391839 | 2.10530898 | 0.03526442 | 0.1775897  |
| Slc35f4     | 16.6061241 | 0.38716681 | 0.4148914  | 0.93317628 | 0.35072896 | 0.64265182 |
| Slc24a4     | 1.9160178  | 0.38703359 | 0.2822527  | 1.3712308  | 0.17030302 | NA         |
| Pradc1      | 985.38809  | 0.38680609 | 0.17540257 | 2.20524762 | 0.02743672 | 0.15081954 |
| Mir409      | 1.99727688 | 0.38676373 | 0.30625301 | 1.26288958 | 0.20662886 | NA         |
| Abcc3       | 36.6965219 | 0.38632958 | 0.41210016 | 0.93746526 | 0.34851928 | 0.64083073 |
| Klk11       | 160.017116 | 0.38603545 | 0.32436232 | 1.19013654 | 0.23399273 | 0.52565461 |
| Pxn         | 3012.49212 | 0.38598366 | 0.19327429 | 1.99707716 | 0.0458168  | 0.20790694 |
| Mfap2       | 4.52652806 | 0.38593501 | 0.39519867 | 0.97655949 | 0.32878728 | NA         |
| Hipk3       | 2360.36178 | 0.3857114  | 0.23424789 | 1.64659499 | 0.09964132 | 0.33009875 |
| Mog         | 9.74434585 | 0.38568868 | 0.42973388 | 0.89750587 | 0.36944904 | 0.6596971  |
| Gab3        | 54.9419421 | 0.3856453  | 0.36633416 | 1.05271455 | 0.29247184 | 0.58633874 |
| Cyp27b1     | 30.7954219 | 0.38561211 | 0.39327943 | 0.98050414 | 0.32683733 | 0.62013754 |
| Snora7a     | 117.061335 | 0.38560336 | 0.3404115  | 1.13275656 | 0.2573165  | 0.55006377 |
| Oxsm        | 671.023685 | 0.38558897 | 0.26659851 | 1.44632831 | 0.14808514 | 0.41292308 |
| Ube2j1      | 1314.76404 | 0.38558781 | 0.18090742 | 2.13140956 | 0.03305542 | 0.16974956 |
| Gsta4       | 38193.7836 | 0.38554075 | 0.20662223 | 1.86592098 | 0.06205242 | 0.25096937 |
| Scp2        | 7540.49749 | 0.38527595 | 0.24127583 | 1.5968278  | 0.1103041  | 0.35105463 |
| Gsk3b       | 6237.27551 | 0.38525956 | 0.20581278 | 1.87189327 | 0.06122137 | 0.24922868 |
| Asb13       | 480.162481 | 0.38525735 | 0.25123909 | 1.53342917 | 0.12517015 | 0.37825902 |
| Mrpl33      | 3097.44439 | 0.38521922 | 0.23680665 | 1.62672469 | 0.10379558 | 0.33917927 |
| Pax2        | 14.2914203 | 0.38496644 | 0.43074134 | 0.89372997 | 0.37146639 | 0.66164325 |
| Cpeb3       | 469.092003 | 0.38496349 | 0.26207029 | 1.46893222 | 0.14185118 | 0.40253636 |
| Nkx2-4      | 12.1013912 | 0.38477103 | 0.40698616 | 0.94541552 | 0.34444678 | 0.63755825 |
| Ccdc74a     | 128.388582 | 0.38470965 | 0.30626438 | 1.2561358  | 0.20906674 | 0.49516588 |
| Mfi2        | 163.668926 | 0.38470185 | 0.41595391 | 0.92486653 | 0.35503534 | 0.64688395 |
| Dlgap3      | 4319.8344  | 0.3841957  | 0.20531347 | 1.87126402 | 0.0613085  | 0.2493875  |
| Trmt61b     | 788.255729 | 0.38411841 | 0.24367698 | 1.57634262 | 0.11494687 | 0.35980159 |
| Arrdc4      | 3471.40163 | 0.3840994  | 0.18771165 | 2.04622038 | 0.04073469 | 0.19342449 |
| Akt3        | 1711.90526 | 0.38404297 | 0.29407134 | 1.30595169 | 0.19156899 | 0.47409787 |
| Sox30       | 6.03564188 | 0.3839193  | 0.41536129 | 0.92430208 | 0.35532906 | 0.64696432 |
| 1700061117R | 1.72501145 | 0.38389939 | 0.28166455 | 1.36296667 | 0.17289302 | NA         |
| Tifa        | 15.0257774 | 0.38389842 | 0.3878325  | 0.98985624 | 0.32224439 | 0.61660582 |
| Mir434      | 3.65583363 | 0.38368534 | 0.37627538 | 1.01969293 | 0.30787412 | NA         |
| Bhlhe22     | 60.1956211 | 0.38356782 | 0.39816616 | 0.96333606 | 0.3353789  | 0.62800397 |
| Zfp438      | 320.958959 | 0.38341651 | 0.29476869 | 1.30073692 | 0.19334852 | 0.47605581 |
| Atox1       | 5935.75652 | 0.38339649 | 0.26905375 | 1.42498101 | 0.15416269 | 0.42237209 |
| Tspo        | 1074.20372 | 0.38323685 | 0.2746493  | 1.39536801 | 0.16290489 | 0.43462627 |

|             |            |            |            |            |            |            |
|-------------|------------|------------|------------|------------|------------|------------|
| Fam20c      | 119.324415 | 0.38322318 | 0.35066192 | 1.09285657 | 0.27445678 | 0.56715903 |
| Rab27a      | 925.098189 | 0.38297005 | 0.22592367 | 1.69513027 | 0.09005071 | 0.31253583 |
| Pramef6     | 3.85738493 | 0.38271405 | 0.31897505 | 1.19982441 | 0.23020754 | NA         |
| Vps37b      | 1149.96848 | 0.38267357 | 0.17562878 | 2.1788773  | 0.02934078 | 0.15701257 |
| Dnajc12     | 461.33859  | 0.38259449 | 0.25353592 | 1.50903465 | 0.13128993 | 0.38745025 |
| 4930556G01I | 2.0390637  | 0.38235072 | 0.30737096 | 1.24393898 | 0.21352202 | NA         |
| Acox3       | 3005.74346 | 0.38230085 | 0.19349202 | 1.97579645 | 0.04817784 | 0.21479746 |
| Acta2       | 6.66175039 | 0.38205058 | 0.36058907 | 1.05951791 | NA         | NA         |
| Tmem175     | 869.261934 | 0.38197304 | 0.23005788 | 1.66033452 | 0.09684717 | 0.32510718 |
| Gm4980      | 5.2393832  | 0.38192932 | 0.39276049 | 0.97242297 | 0.33084017 | NA         |
| Zfp947      | 480.912762 | 0.38165947 | 0.1914331  | 1.99369638 | 0.04618525 | 0.20895868 |
| Arap2       | 1265.99281 | 0.38135242 | 0.27357142 | 1.39397758 | 0.16332437 | 0.43535436 |
| Zswim5      | 690.351051 | 0.38128768 | 0.26719878 | 1.42698136 | 0.15358527 | 0.42145836 |
| Morn2       | 322.869782 | 0.38128341 | 0.271452   | 1.40460711 | 0.16013814 | 0.43144633 |
| Tmod1       | 5.0575309  | 0.38116695 | 0.40209231 | 0.94795881 | 0.34315042 | NA         |
| Clvs2       | 55.3805756 | 0.38114883 | 0.38435613 | 0.99165539 | 0.32136566 | 0.61561436 |
| Lkaaear1    | 2.18475992 | 0.38107734 | 0.30198211 | 1.26192027 | 0.20697748 | NA         |
| Mmaa        | 315.960098 | 0.38076851 | 0.22928714 | 1.66066233 | 0.09678128 | 0.32506387 |
| Fam89a      | 109.129371 | 0.38067509 | 0.40085262 | 0.94966348 | 0.34228327 | 0.63594351 |
| Aven        | 2493.55145 | 0.38059589 | 0.19408522 | 1.96097303 | 0.04988217 | 0.21943921 |
| L1cam       | 44.7726834 | 0.38051219 | 0.41235141 | 0.9227862  | 0.35611863 | 0.64764054 |
| 1700029J07R | 23.0477119 | 0.38023057 | 0.42380472 | 0.89718342 | 0.36962105 | 0.65992847 |
| Slc9a2      | 8.88634659 | 0.37975527 | 0.4173031  | 0.91002265 | 0.36281057 | 0.65337545 |
| Asap1       | 3357.84351 | 0.37925408 | 0.22901655 | 1.65601171 | 0.09771945 | 0.3266927  |
| Trpv3       | 51.6665866 | 0.379165   | 0.4260953  | 0.88985963 | 0.37354127 | 0.6633372  |
| Fgf5        | 7.7361298  | 0.37906548 | 0.41647733 | 0.91017074 | 0.36273247 | 0.65337545 |
| Apon        | 8.72722503 | 0.37869757 | 0.41407029 | 0.91457314 | 0.36041577 | 0.65134522 |
| Maf         | 3.26171558 | 0.37857752 | 0.35261664 | 1.07362351 | 0.28299146 | NA         |
| 1700007K13F | 1679.99021 | 0.37836417 | 0.27414018 | 1.38018499 | 0.16752969 | 0.44231821 |
| G6pc2       | 4.28192071 | 0.37828317 | 0.34216122 | 1.10556997 | 0.26891269 | NA         |
| Mettl11b    | 4.41911748 | 0.37820283 | 0.34749262 | 1.08837659 | 0.27642889 | NA         |
| Lrrc74      | 16.8800219 | 0.37812286 | 0.42495659 | 0.88979173 | 0.37357773 | 0.6633372  |
| Afap1l1     | 316.074127 | 0.37789772 | 0.33042041 | 1.1436876  | 0.25275322 | 0.54598821 |
| Serf1       | 128.30792  | 0.37777062 | 0.32455356 | 1.16397005 | 0.24443615 | 0.53699054 |
| Vps53       | 1912.18502 | 0.3777138  | 0.25837375 | 1.46188924 | 0.14377156 | 0.40540192 |
| Slc4a1      | 32.0033586 | 0.37761221 | 0.41883337 | 0.901581   | 0.36727949 | 0.65733265 |
| 2810410L24F | 193.922905 | 0.37751975 | 0.37257536 | 1.01327085 | 0.31093081 | 0.60555499 |
| Pacrg       | 21.2278119 | 0.3774975  | 0.4293745  | 0.87918007 | 0.37930365 | 0.66834881 |
| Cdipt       | 3433.97837 | 0.37746841 | 0.17677912 | 2.13525442 | 0.03274023 | 0.16898306 |
| Fam21       | 16772.0177 | 0.37731965 | 0.16633736 | 2.26839989 | 0.02330484 | 0.13636812 |
| Trim65      | 27.8926463 | 0.37724696 | 0.40347947 | 0.93498428 | 0.3497964  | 0.64198366 |

|             |            |            |            |            |            |            |
|-------------|------------|------------|------------|------------|------------|------------|
| Nat3        | 3.28017402 | 0.37717718 | 0.35962022 | 1.04882084 | 0.29426058 | NA         |
| Cmtm2b      | 5.12075626 | 0.37712397 | 0.40720215 | 0.92613452 | 0.35437608 | NA         |
| Lrrc28      | 1894.44549 | 0.37709986 | 0.25737548 | 1.465174   | 0.14287345 | 0.40406505 |
| Pbx4        | 403.843201 | 0.3770922  | 0.26745208 | 1.40994302 | 0.15855651 | 0.4288771  |
| Cggbp1      | 16832.9308 | 0.37707497 | 0.23521665 | 1.6030964  | 0.10891337 | 0.34885929 |
| Tmem106a    | 656.841693 | 0.37697876 | 0.26116374 | 1.44345751 | 0.14889163 | 0.41398423 |
| Spon2       | 54.6373376 | 0.37696688 | 0.35540355 | 1.06067282 | 0.28883862 | 0.58216601 |
| Metap1d     | 1417.36336 | 0.37687151 | 0.21251547 | 1.77338386 | 0.07616512 | 0.28295361 |
| Slc10a6     | 18.0731713 | 0.37673243 | 0.39488496 | 0.95403086 | 0.34006802 | 0.63349279 |
| Gm4532      | 62.2392475 | 0.37667411 | 0.40509908 | 0.92983205 | 0.35245805 | 0.64439796 |
| Tdpoz4      | 5.48531385 | 0.37664813 | 0.32451182 | 1.16066075 | 0.24577989 | NA         |
| Lrriq3      | 32.5672259 | 0.37602361 | 0.38919671 | 0.96615312 | 0.33396757 | 0.62718213 |
| Ppp1r11     | 2557.38342 | 0.37585726 | 0.21371656 | 1.75867164 | 0.0786333  | 0.28897585 |
| Donson      | 2702.45766 | 0.37579804 | 0.19731677 | 1.90454181 | 0.05683966 | 0.23756811 |
| Hoxd12      | 4.68642731 | 0.37569798 | 0.36988139 | 1.01572555 | 0.3097601  | NA         |
| Gpr126      | 688.801941 | 0.37562003 | 0.38427002 | 0.97748982 | 0.32832672 | 0.62193444 |
| Gpsm3       | 241.457788 | 0.37561815 | 0.32505729 | 1.15554444 | 0.24786754 | 0.54110799 |
| 4933421O10I | 31.3259712 | 0.37542504 | 0.41977741 | 0.89434312 | 0.37113833 | 0.66146638 |
| Gm5617      | 286.993634 | 0.3753761  | 0.31475881 | 1.1925833  | 0.23303261 | 0.52474516 |
| 1700094D03I | 424.653717 | 0.37534649 | 0.24278608 | 1.54599676 | 0.12210535 | 0.37232555 |
| Ccdc80      | 14.0816332 | 0.37532956 | 0.33409968 | 1.12340592 | NA         | NA         |
| Syndig1     | 464.39278  | 0.37525008 | 0.37099507 | 1.01146918 | 0.31179193 | 0.60634544 |
| Col12a1     | 44.8353959 | 0.37515282 | 0.29652149 | 1.26517917 | NA         | NA         |
| Rad9b       | 309.680705 | 0.37502985 | 0.30093262 | 1.24622533 | 0.21268168 | 0.49936733 |
| Lrrc14      | 827.570557 | 0.37496782 | 0.23182774 | 1.61744158 | 0.105783   | 0.34250081 |
| Edaradd     | 49.2020697 | 0.37496591 | 0.42499867 | 0.8822755  | 0.37762784 | 0.6672936  |
| Rps6kl1     | 1203.58062 | 0.37492881 | 0.24050706 | 1.55890978 | 0.11901774 | 0.36689611 |
| Ctsd        | 27382.809  | 0.37492838 | 0.20968805 | 1.7880293  | 0.07377128 | 0.2772625  |
| Dmrt3       | 176.73092  | 0.37482237 | 0.33600309 | 1.11553251 | 0.2646223  | 0.55625052 |
| Pak3        | 73.788346  | 0.37472029 | 0.37974019 | 0.98678071 | 0.32375016 | 0.61843    |
| Fgfr2       | 276.766763 | 0.37449874 | 0.39387845 | 0.95079775 | 0.34170705 | 0.63510056 |
| Rell2       | 49.5835191 | 0.37448199 | 0.40013523 | 0.93588857 | 0.34933056 | 0.64174375 |
| Hmgcll1     | 136.283792 | 0.37447433 | 0.41817292 | 0.89550113 | 0.37051926 | 0.66077465 |
| Arrdc5      | 22.6928327 | 0.37441635 | 0.42463182 | 0.8817435  | 0.37791553 | 0.66753344 |
| 1700101I11R | 1.6909944  | 0.37438705 | 0.2788913  | 1.34241208 | 0.17946242 | NA         |
| Stpg2       | 1.6909944  | 0.37438705 | 0.2788913  | 1.34241208 | 0.17946242 | NA         |
| Capsl       | 1264.36716 | 0.37432709 | 0.27819698 | 1.34554692 | 0.17844868 | 0.45619849 |
| Htr1b       | 27.5383832 | 0.37426652 | 0.41919844 | 0.89281468 | 0.37195642 | 0.66204582 |
| Tgfa        | 95.047574  | 0.374241   | 0.31257454 | 1.19728563 | 0.23119524 | 0.52281662 |
| Cd209f      | 7.41966001 | 0.37419699 | 0.35308822 | 1.05978329 | 0.2892432  | 0.5824943  |
| Lurap1l     | 355.487872 | 0.3736395  | 0.32864274 | 1.13691693 | 0.25557301 | 0.54856501 |

|             |            |            |            |            |            |            |
|-------------|------------|------------|------------|------------|------------|------------|
| Dpep1       | 10.6792311 | 0.37358169 | 0.42618972 | 0.87656194 | 0.38072462 | 0.66978428 |
| Dsc2        | 188.051765 | 0.37342223 | 0.33214031 | 1.12429062 | 0.26088976 | 0.55289719 |
| Npm2        | 111.599935 | 0.37340709 | 0.39350744 | 0.94892002 | 0.34266129 | 0.63641774 |
| Nlrp4c      | 450.797221 | 0.37338951 | 0.34609323 | 1.07886973 | 0.2806458  | 0.57267063 |
| Sh3rf3      | 47.2625749 | 0.37330469 | 0.42838793 | 0.87141737 | 0.38352631 | 0.67248981 |
| Zfyve19     | 939.512978 | 0.37325714 | 0.1891207  | 1.97364502 | 0.04842212 | 0.21545419 |
| Zdhhc18     | 4481.90423 | 0.37311385 | 0.24538216 | 1.52054189 | 0.12837484 | 0.3824439  |
| Pde1c       | 18.0022955 | 0.37302823 | 0.43069738 | 0.86610285 | 0.38643376 | 0.67531632 |
| D630023F18f | 815.982171 | 0.37299477 | 0.29073664 | 1.28293006 | 0.19951658 | 0.48250548 |
| B9d1        | 1282.51471 | 0.37296547 | 0.27306338 | 1.36585681 | 0.17198391 | 0.44859473 |
| AU022754    | 1.67844457 | 0.37295418 | 0.27848125 | 1.3392434  | 0.18049145 | NA         |
| 4930549C01f | 9.02794502 | 0.37277308 | 0.41573371 | 0.89666311 | 0.36989871 | 0.66024881 |
| Artn        | 13.8686379 | 0.37264075 | 0.42930319 | 0.868013   | 0.38538722 | 0.67452523 |
| Abcc12      | 25.8657485 | 0.37253852 | 0.43146422 | 0.86342854 | 0.38790189 | 0.67702159 |
| Trnp1       | 228.539284 | 0.37246235 | 0.34243907 | 1.08767481 | 0.27673869 | 0.56928593 |
| Tgm6        | 3.77606603 | 0.37243374 | 0.35669747 | 1.04411658 | 0.29643146 | NA         |
| Rcbtb2      | 2759.65807 | 0.372426   | 0.33372239 | 1.11597548 | 0.26443263 | 0.55607733 |
| Lamb1       | 4657.3422  | 0.3721081  | 0.2018859  | 1.84316046 | 0.06530559 | 0.25887514 |
| Tceb1       | 8551.69975 | 0.37199866 | 0.2120728  | 1.75410832 | 0.07941195 | 0.29073126 |
| Cadm2       | 8.31078956 | 0.37192826 | 0.42585504 | 0.87336824 | 0.3824624  | 0.67137416 |
| Slc7a6      | 5515.14673 | 0.37187668 | 0.15926793 | 2.33491246 | 0.01954799 | 0.12174244 |
| Eif4ebp3    | 972.074903 | 0.37170375 | 0.22444747 | 1.65608348 | 0.09770491 | 0.3266927  |
| Slc39a5     | 5.67264422 | 0.37165716 | 0.38862511 | 0.95633852 | 0.33890123 | NA         |
| Ext1        | 2546.4335  | 0.37148167 | 0.23224425 | 1.59953006 | 0.10970287 | 0.35016203 |
| Acvr1       | 1209.06549 | 0.37133161 | 0.20564475 | 1.8056946  | 0.07096606 | 0.27115311 |
| Fam206a     | 1315.81492 | 0.37132966 | 0.20276137 | 1.83136296 | 0.06704639 | 0.26304109 |
| C030006K11f | 276.991565 | 0.37121552 | 0.25943952 | 1.43083647 | 0.15247709 | 0.42004804 |
| Zfp36l2     | 2422.33552 | 0.37083976 | 0.18258685 | 2.03103211 | 0.04225174 | 0.19756905 |
| Prss41      | 124.462027 | 0.37073318 | 0.32719586 | 1.13306197 | 0.25718823 | 0.55006377 |
| Arhgef5     | 117.421835 | 0.37046326 | 0.39173597 | 0.94569632 | 0.3443035  | 0.63748824 |
| Spry1       | 636.619779 | 0.37042356 | 0.33523651 | 1.10496185 | 0.26917612 | 0.56217537 |
| Smim22      | 176.626685 | 0.3703036  | 0.38349521 | 0.96560164 | 0.33424355 | 0.6274531  |
| 4930413G21f | 3.9777964  | 0.37029977 | 0.38079809 | 0.97243077 | 0.33083629 | NA         |
| Tspan33     | 259.83077  | 0.37027891 | 0.26163182 | 1.4152671  | 0.1569902  | 0.42643748 |
| Gipc1       | 7171.46364 | 0.37024455 | 0.19049619 | 1.94357981 | 0.05194614 | 0.22483007 |
| Mst1r       | 69.4699377 | 0.37023509 | 0.36013592 | 1.02804264 | 0.30392977 | 0.59881058 |
| 1810009A15f | 40.310921  | 0.37006841 | 0.377114   | 0.98131706 | 0.32643641 | 0.61957682 |
| Rhob        | 1282.17678 | 0.37005172 | 0.21117205 | 1.75237076 | 0.07971008 | 0.29132599 |
| Meis3       | 126.684615 | 0.37003895 | 0.36704989 | 1.00814348 | 0.31338559 | 0.60787966 |
| Phf21b      | 384.597367 | 0.36975943 | 0.21338067 | 1.73286286 | 0.08312005 | 0.29872888 |
| Dapk3       | 1585.23528 | 0.36971311 | 0.20811274 | 1.77650397 | 0.07564989 | 0.28151027 |

|             |            |            |            |            |            |            |
|-------------|------------|------------|------------|------------|------------|------------|
| Dnaja1      | 10760.8397 | 0.36930465 | 0.18054057 | 2.04554939 | 0.04080073 | 0.1936198  |
| Asl         | 2330.01946 | 0.36922825 | 0.2125373  | 1.73723974 | 0.08234486 | 0.29691219 |
| Fn1         | 127383.573 | 0.3692222  | 0.23153159 | 1.59469473 | 0.11078052 | 0.35177853 |
| Rnu73b      | 33.3794744 | 0.36904529 | 0.38718835 | 0.95314151 | 0.34051838 | 0.63402793 |
| Lrrd1       | 3.92936836 | 0.36901539 | 0.3871618  | 0.95312966 | 0.34052438 | NA         |
| Pmm2        | 1734.74526 | 0.36898    | 0.21290016 | 1.73311283 | 0.08307562 | 0.29863822 |
| Wdr20rt     | 168.505132 | 0.36890125 | 0.26399213 | 1.39739488 | 0.16229486 | 0.43365074 |
| Serf2       | 9269.27424 | 0.36889984 | 0.19632799 | 1.87899769 | 0.06024481 | 0.24686878 |
| Ptpro       | 19.5484035 | 0.36889591 | 0.43053656 | 0.8568283  | 0.39153978 | 0.67959748 |
| Smap2       | 1821.08375 | 0.36875103 | 0.22546127 | 1.63554043 | 0.10193581 | 0.3353509  |
| Snord43     | 24.997131  | 0.36864066 | 0.43205753 | 0.85322124 | 0.39353663 | 0.68119858 |
| Srp54c      | 963.141866 | 0.36863964 | 0.16793114 | 2.19518336 | 0.02815045 | 0.15349495 |
| Hmgcl       | 2132.54363 | 0.3684487  | 0.20989218 | 1.75541887 | 0.07918769 | 0.29029885 |
| Prdx6       | 17498.0543 | 0.36840077 | 0.37872353 | 0.97274327 | 0.33068091 | 0.62385283 |
| Spire1      | 2741.85037 | 0.36818364 | 0.25679375 | 1.43377184 | 0.15163738 | 0.41871751 |
| Sftpb       | 4.15544429 | 0.36816393 | 0.39728778 | 0.92669332 | 0.35408579 | NA         |
| Apex2       | 1046.92852 | 0.36777303 | 0.25702639 | 1.43087654 | 0.1524656  | 0.42004804 |
| Serpina3i   | 288.22783  | 0.36766816 | 0.286509   | 1.28326914 | 0.1993978  | 0.48250548 |
| Nrxn1       | 17.8305394 | 0.36766811 | 0.42625683 | 0.86255065 | 0.38838457 | 0.67748384 |
| Zfp697      | 79.7236581 | 0.36747063 | 0.33981931 | 1.08137066 | 0.27953227 | 0.57200243 |
| Atf3        | 326.406748 | 0.36727968 | 0.32258881 | 1.13853819 | 0.25489582 | 0.54795202 |
| 9330133O14I | 141.703573 | 0.36722194 | 0.27756677 | 1.323004   | 0.18583405 | 0.46651464 |
| 2310033P09F | 1124.65333 | 0.36717544 | 0.24058237 | 1.5261943  | 0.12696148 | 0.3807865  |
| Znrf2       | 6398.95649 | 0.36715462 | 0.22387562 | 1.63999377 | 0.10100646 | 0.3332806  |
| Atxn7       | 975.397467 | 0.36694203 | 0.23998588 | 1.52901507 | 0.12626071 | 0.3792699  |
| Mir196a-1   | 166.804918 | 0.36687157 | 0.28894384 | 1.26969854 | 0.20419203 | 0.48934971 |
| Gm8817      | 4.61695441 | 0.36681452 | 0.39943311 | 0.91833778 | 0.35844205 | NA         |
| Btnl9       | 1.66589474 | 0.36680984 | 0.27663985 | 1.32594723 | 0.18485718 | NA         |
| Dusp8       | 30.602957  | 0.3666877  | 0.43224958 | 0.84832403 | 0.39625754 | 0.6829437  |
| Tbc1d30     | 22.8934953 | 0.36657935 | 0.43224349 | 0.84808529 | 0.39639048 | 0.68309711 |
| Sema4g      | 1263.77486 | 0.36647075 | 0.23591472 | 1.55340352 | 0.12032676 | 0.36907327 |
| Ncf1        | 26.0963856 | 0.36642435 | 0.42328002 | 0.86567835 | 0.38666657 | 0.6755479  |
| Csn3        | 2.21847325 | 0.36631262 | 0.32864975 | 1.11459883 | 0.26502237 | NA         |
| Zfp219      | 5166.06514 | 0.36613966 | 0.20815594 | 1.75896807 | 0.07858293 | 0.2888991  |
| Tha1        | 32.3016947 | 0.36610348 | 0.39895521 | 0.91765561 | 0.35879919 | 0.64978295 |
| Cand1       | 21863.1021 | 0.36601732 | 0.18142661 | 2.01744007 | 0.04364961 | 0.2017424  |
| Dnajc3      | 5872.59304 | 0.36591274 | 0.25802282 | 1.41814102 | 0.1561496  | 0.42502178 |
| Rcor3       | 1009.07541 | 0.36590535 | 0.23326368 | 1.56863407 | 0.11673323 | 0.36262853 |
| Cdk6        | 1419.6174  | 0.36586609 | 0.25521636 | 1.43355266 | 0.15169996 | 0.41871751 |
| Acot12      | 2.07308075 | 0.36555431 | 0.30154303 | 1.21227911 | 0.22540556 | NA         |
| Nrsn2       | 17.2568207 | 0.36553995 | 0.42604167 | 0.85799108 | 0.39089739 | 0.67903559 |

|             |            |            |            |            |            |            |
|-------------|------------|------------|------------|------------|------------|------------|
| Hexa        | 9979.49425 | 0.36552066 | 0.22251202 | 1.64270075 | 0.10044486 | 0.33206167 |
| Ccdc3       | 262.806429 | 0.36532977 | 0.40610385 | 0.8995969  | 0.36833481 | 0.65876649 |
| Gpr88       | 2.07070507 | 0.36497385 | 0.29840036 | 1.22310126 | 0.22129145 | NA         |
| Magea6      | 11.6627492 | 0.36442225 | 0.43213714 | 0.84330232 | 0.39905938 | 0.68473712 |
| Zdhhc24     | 1271.97671 | 0.36442084 | 0.27429082 | 1.32859291 | 0.18398231 | 0.46444825 |
| Tmem119     | 4.44697679 | 0.36411546 | 0.38996751 | 0.93370717 | 0.35045496 | NA         |
| Fam50a      | 4474.19417 | 0.36399307 | 0.17931642 | 2.02989254 | 0.04236746 | 0.19800363 |
| Nptx1       | 109.979042 | 0.36387669 | 0.37278362 | 0.97610698 | 0.32901145 | 0.62234394 |
| Cmip        | 4353.11199 | 0.36357649 | 0.20894714 | 1.74004053 | 0.0818519  | 0.29588073 |
| 2610203C20F | 6.34763764 | 0.3632378  | 0.40046776 | 0.90703382 | 0.36438891 | 0.65441876 |
| Kcnj9       | 7.4348131  | 0.36314435 | 0.42028088 | 0.86405156 | 0.38755957 | 0.67657598 |
| Pcdhga6     | 3.46964574 | 0.36303117 | 0.3489354  | 1.0403965  | 0.29815573 | NA         |
| Chn1os3     | 4.46718794 | 0.36279846 | 0.37506251 | 0.96730134 | 0.33339342 | NA         |
| Adamts20    | 17.7443014 | 0.36277207 | 0.43198888 | 0.83977177 | 0.40103636 | 0.68630443 |
| Cecr6       | 2.02613649 | 0.36275798 | 0.3038396  | 1.1939128  | 0.23251208 | NA         |
| Cckbr       | 108.837554 | 0.36271737 | 0.36103237 | 1.00466715 | 0.31505715 | 0.6093449  |
| Lrrc51      | 105.713525 | 0.36264615 | 0.38607351 | 0.93931893 | 0.34756702 | 0.63980565 |
| Ndufc1      | 4419.47785 | 0.36262903 | 0.22731727 | 1.5952551  | 0.1106552  | 0.35161403 |
| Odf3l2      | 9.10178912 | 0.36243936 | 0.42291647 | 0.85699987 | 0.39144496 | 0.67959748 |
| Casd1       | 840.365191 | 0.36204184 | 0.21861615 | 1.65606172 | 0.09770932 | 0.3266927  |
| Ndnl2       | 2402.87982 | 0.36202641 | 0.1703659  | 2.12499339 | 0.03358716 | 0.17153169 |
| Rap2a       | 2110.30855 | 0.36195288 | 0.28601172 | 1.26551764 | 0.20568583 | 0.49055804 |
| Tssc4       | 1953.22427 | 0.36193844 | 0.21219499 | 1.70568794 | 0.0880662  | 0.30893693 |
| Ubl7        | 2750.18316 | 0.36148726 | 0.18168443 | 1.98964362 | 0.04663021 | 0.20988317 |
| 3425401B19F | 2.24200585 | 0.36147797 | 0.29513618 | 1.22478366 | 0.22065674 | NA         |
| Lasp1       | 17815.7977 | 0.3613432  | 0.17206421 | 2.10004856 | 0.03572457 | 0.17908433 |
| Zscan4a     | 74.6207239 | 0.36124862 | 0.4314764  | 0.83723843 | 0.40245856 | 0.68708234 |
| Gstt2       | 538.088336 | 0.36123494 | 0.35127149 | 1.02836394 | 0.30377866 | 0.5985887  |
| 3110002H16I | 3395.82568 | 0.36120701 | 0.20482087 | 1.76352638 | 0.07781175 | 0.28677459 |
| 1700092M07  | 15.7591588 | 0.36109354 | 0.42986494 | 0.84001626 | 0.40089927 | 0.68622834 |
| Nrsn1       | 10.3945182 | 0.36102895 | 0.419594   | 0.86042446 | 0.38955511 | 0.67794934 |
| Slc35b1     | 3355.12011 | 0.36098001 | 0.19216082 | 1.87853081 | 0.06030859 | 0.24693492 |
| Acadvl      | 2333.31718 | 0.36095173 | 0.2216544  | 1.62844381 | 0.10343082 | 0.33855033 |
| Vsig8       | 3.93852308 | 0.36078465 | 0.37117229 | 0.97201397 | 0.3310436  | NA         |
| Gm590       | 7.63616354 | 0.36071669 | 0.35599576 | 1.01326121 | 0.31093541 | 0.60555499 |
| Fam105a     | 13.4045316 | 0.36066783 | 0.43225516 | 0.83438642 | 0.40406327 | 0.68846147 |
| Spon1       | 6.91187406 | 0.36060279 | 0.41149581 | 0.8763219  | 0.38085506 | 0.66983455 |
| Grik2       | 2.40239751 | 0.3604498  | 0.3541685  | 1.01773534 | 0.30880375 | NA         |
| 0610010F05F | 2510.06207 | 0.36025042 | 0.22161532 | 1.62556641 | 0.10404193 | 0.33939891 |
| Slc15a4     | 1522.17973 | 0.35968091 | 0.18835584 | 1.90958198 | 0.05618706 | 0.23611787 |
| Tmed9       | 8805.61524 | 0.35960698 | 0.17494023 | 2.05559914 | 0.03982117 | 0.19089366 |



|             |            |            |            |            |            |            |
|-------------|------------|------------|------------|------------|------------|------------|
| Rhbdf1      | 666.215008 | 0.35946204 | 0.22129401 | 1.62436412 | 0.10429812 | 0.33956461 |
| Capn9       | 20.8072049 | 0.35944653 | 0.43181993 | 0.83239911 | 0.4051837  | 0.68916712 |
| Itpa        | 5125.56215 | 0.35899656 | 0.18198924 | 1.97262521 | 0.04853828 | 0.21572414 |
| Dscam       | 30.1802133 | 0.35883078 | 0.4311187  | 0.83232479 | 0.40522564 | 0.68916712 |
| Dcaf5       | 2212.42001 | 0.3587068  | 0.2001129  | 1.79252209 | 0.07304937 | 0.27560749 |
| Nutf2       | 1113.94559 | 0.35847708 | 0.1733235  | 2.06825436 | 0.03861611 | 0.18764984 |
| Jak3        | 4788.73372 | 0.35842675 | 0.29309021 | 1.222923   | 0.22135878 | 0.5096956  |
| Zmynd12     | 9.60660747 | 0.35836043 | 0.42659803 | 0.84004238 | 0.40088463 | 0.68622834 |
| Mdp1        | 2868.97454 | 0.35817876 | 0.20068305 | 1.78479823 | 0.07429405 | 0.27859821 |
| Pced1a      | 842.106898 | 0.35813727 | 0.21209522 | 1.68856833 | 0.09130218 | 0.31461118 |
| Abhd6       | 974.925661 | 0.35808096 | 0.25923541 | 1.38129651 | 0.16718781 | 0.44179059 |
| Catip       | 143.370113 | 0.35804347 | 0.3839241  | 0.93258919 | 0.35103212 | 0.64305577 |
| Dqx1        | 429.244004 | 0.35787724 | 0.26565771 | 1.34713665 | 0.17793623 | 0.45556244 |
| Snhg10      | 98.3407263 | 0.35766669 | 0.32239035 | 1.10942118 | 0.26724853 | 0.55978401 |
| Timmdc1     | 2117.6057  | 0.35759914 | 0.2129229  | 1.67947716 | 0.09305909 | 0.31749931 |
| Tmem28      | 95.8072172 | 0.35757767 | 0.32783348 | 1.09072956 | 0.2753919  | 0.56766083 |
| Tbc1d8b     | 395.071682 | 0.35747608 | 0.27511813 | 1.29935487 | 0.19382217 | 0.47646674 |
| Cyp26b1     | 11.523617  | 0.35733957 | 0.43216868 | 0.82685209 | 0.4083209  | 0.69198369 |
| Gabra1      | 6.37291643 | 0.35733932 | 0.37751188 | 0.94656444 | 0.34386077 | 0.63719957 |
| Ptrf        | 2007.77274 | 0.35714023 | 0.33549523 | 1.06451655 | 0.28709476 | 0.58057356 |
| Ptgfrn      | 17679.6167 | 0.35697672 | 0.21246227 | 1.68018882 | 0.09292058 | 0.31730523 |
| Card6       | 289.062255 | 0.35693512 | 0.27531632 | 1.29645465 | 0.1948189  | 0.47770871 |
| Fam173b     | 275.042646 | 0.35658835 | 0.23285403 | 1.53138148 | 0.12567514 | 0.37885621 |
| Mir7079     | 40.1037121 | 0.35636146 | 0.37978354 | 0.93832781 | 0.34807597 | 0.64035602 |
| Zdhhc19     | 9.89453094 | 0.35632992 | 0.43087142 | 0.82699826 | 0.40823805 | 0.69198369 |
| Cotl1       | 1039.57607 | 0.35607628 | 0.26205101 | 1.35880524 | 0.17420831 | 0.45151891 |
| Gm13238     | 16.4201775 | 0.35600343 | 0.43100319 | 0.82598791 | 0.40881095 | 0.6924459  |
| Nkpd1       | 10.7590772 | 0.35598071 | 0.42956626 | 0.82869803 | 0.4072753  | 0.69113538 |
| Tmsb10      | 25007.5196 | 0.35582214 | 0.17639015 | 2.01724492 | 0.04366996 | 0.2017424  |
| Cenpb       | 3807.11876 | 0.35562849 | 0.19646974 | 1.81009293 | 0.07028138 | 0.26987118 |
| Taf12       | 2646.83253 | 0.35560879 | 0.19663737 | 1.80844968 | 0.07053654 | 0.27025546 |
| D730005E14f | 128.380682 | 0.35547897 | 0.34550667 | 1.02886283 | 0.30354414 | 0.59850576 |
| Ly6d        | 3.79784356 | 0.35537166 | 0.37967726 | 0.93598352 | 0.34928167 | NA         |
| Timm10b     | 1194.7071  | 0.35529908 | 0.21265091 | 1.67080909 | 0.09475939 | 0.32118642 |
| Fam154b     | 13.8742974 | 0.35517157 | 0.43176876 | 0.82259673 | 0.41073736 | 0.69330041 |
| Ltbp1       | 1015.42368 | 0.35500962 | 0.39724743 | 0.89367381 | 0.37149644 | 0.66164325 |
| Nsun4       | 1809.47856 | 0.3544678  | 0.16191345 | 2.1892425  | 0.02857922 | 0.1549824  |
| Acot6       | 20.8370943 | 0.35445988 | 0.42118288 | 0.84158188 | 0.40002203 | 0.68523795 |
| Ldhc        | 459.07347  | 0.35427537 | 0.40258488 | 0.88000167 | 0.3788584  | 0.66806067 |
| Gpr124      | 619.848086 | 0.35427351 | 0.39561534 | 0.89549994 | 0.3705199  | 0.66077465 |
| Pomt2       | 1481.41787 | 0.35426808 | 0.18946277 | 1.86985592 | 0.06150383 | 0.24979003 |

|             |            |            |            |            |            |            |
|-------------|------------|------------|------------|------------|------------|------------|
| Apoc2       | 18.2372455 | 0.35420913 | 0.43024252 | 0.82327783 | 0.41035002 | 0.69309338 |
| Ndnf        | 3.24554294 | 0.35398306 | 0.34990901 | 1.01164317 | 0.31170869 | NA         |
| St3gal5     | 692.836474 | 0.35391523 | 0.36502526 | 0.96956365 | 0.33226404 | 0.62562515 |
| Syt2        | 9.56316787 | 0.3539146  | 0.42552634 | 0.83171102 | 0.40557254 | 0.68944672 |
| Ampd1       | 55.5891377 | 0.35387276 | 0.36538957 | 0.96848075 | 0.33280433 | 0.62603606 |
| 1110008P14F | 863.504704 | 0.3536713  | 0.2376657  | 1.48810408 | 0.13672345 | 0.39489535 |
| Procr       | 50.5154863 | 0.35363284 | 0.37308827 | 0.94785302 | 0.34320428 | 0.63670595 |
| Dhrs13      | 814.142346 | 0.35358567 | 0.24340964 | 1.45263623 | 0.14632478 | 0.4103691  |
| Glis1       | 13.4964949 | 0.3535538  | 0.43226428 | 0.81791121 | 0.41340789 | 0.69566523 |
| Arhgap40    | 10.0622604 | 0.35327309 | 0.43198762 | 0.81778522 | 0.41347984 | 0.69566523 |
| Magea3      | 7.09543417 | 0.35307739 | 0.41333303 | 0.85422013 | 0.39298303 | 0.68084661 |
| Dusp3       | 604.778222 | 0.35256221 | 0.28934627 | 1.21847852 | 0.22304218 | 0.51207347 |
| 9130024F11F | 13.7018421 | 0.35235581 | 0.42719605 | 0.82481055 | 0.40947916 | 0.69283107 |
| Chpt1       | 1992.24969 | 0.35229957 | 0.23119917 | 1.5237925  | 0.12756055 | 0.38162642 |
| Mospd3      | 943.995735 | 0.35221966 | 0.22307828 | 1.57890614 | 0.11435759 | 0.3582544  |
| Acsl6       | 1591.86331 | 0.35219633 | 0.26691388 | 1.31951301 | 0.18699766 | 0.46805096 |
| Pomgnt1     | 3203.67557 | 0.3521704  | 0.15430372 | 2.28231961 | 0.02247048 | 0.13322089 |
| Ly6g5b      | 19.9967996 | 0.35198727 | 0.42986127 | 0.81883922 | 0.41287815 | 0.69515344 |
| Map4k5      | 3783.54355 | 0.35177695 | 0.17269912 | 2.03693537 | 0.04165652 | 0.19571013 |
| Calcoco2    | 16177.6261 | 0.35171535 | 0.33165562 | 1.06048363 | 0.28892463 | 0.58216601 |
| Gabra3      | 5.50386272 | 0.35161426 | 0.40067553 | 0.87755361 | 0.38018601 | NA         |
| 2900092D14I | 4.46413114 | 0.35155085 | 0.39608914 | 0.88755488 | 0.37478024 | NA         |
| Sharpin     | 1360.6328  | 0.35112035 | 0.18834707 | 1.86421988 | 0.06229083 | 0.25167179 |
| Bpifb1      | 13.6463159 | 0.35108824 | 0.43203557 | 0.81263735 | 0.41642601 | 0.69837863 |
| Fam167b     | 2.52981082 | 0.35101156 | 0.31580841 | 1.11146997 | 0.26636611 | NA         |
| Znrf1       | 2266.94864 | 0.35086503 | 0.25034433 | 1.40152979 | 0.1610557  | 0.43209007 |
| Hhat        | 293.551742 | 0.35041673 | 0.23660172 | 1.48104049 | 0.13859578 | 0.39795108 |
| Gria3       | 54.8133695 | 0.35029113 | 0.42035705 | 0.83331808 | 0.40466536 | 0.68911875 |
| Ccdc146     | 2.40415917 | 0.35020212 | 0.3504808  | 0.99920487 | 0.31769546 | NA         |
| Pithd1      | 2816.35687 | 0.35018076 | 0.15640911 | 2.23887701 | 0.02516392 | 0.14318482 |
| Actr1a      | 7003.84238 | 0.34989863 | 0.17295559 | 2.02305476 | 0.0430675  | 0.20005532 |
| Gm13119     | 72.6033753 | 0.34956418 | 0.41955222 | 0.83318396 | 0.40474099 | 0.68911875 |
| Plekhg1     | 5092.41927 | 0.34938283 | 0.20831046 | 1.67722175 | 0.09349913 | 0.3186469  |
| Gm10789     | 23.613749  | 0.34936387 | 0.42624272 | 0.81963599 | 0.41242365 | 0.69501519 |
| E330023G01I | 1.83313184 | 0.34929014 | 0.29665147 | 1.17744281 | 0.23901881 | NA         |
| Gm15127     | 2.04931151 | 0.34926391 | 0.32520842 | 1.07396946 | 0.28283637 | NA         |
| Rims1       | 351.787849 | 0.34902831 | 0.341742   | 1.0213211  | 0.30710233 | 0.60163119 |
| Lrrc8c      | 274.374582 | 0.34895516 | 0.4189306  | 0.83296652 | 0.40486361 | 0.68915154 |
| Chst14      | 231.455261 | 0.34893425 | 0.26288496 | 1.32732679 | 0.18440061 | 0.4644599  |
| Ptprf       | 14841.6372 | 0.34892062 | 0.23594486 | 1.4788227  | 0.13918771 | 0.39898766 |
| Efnb2       | 343.929192 | 0.34888627 | 0.37195562 | 0.93797822 | 0.3482556  | 0.64061071 |

|             |            |            |            |            |            |            |
|-------------|------------|------------|------------|------------|------------|------------|
| Errfi1      | 1190.31008 | 0.34886165 | 0.20543594 | 1.69815299 | 0.08947889 | 0.31119611 |
| Fam229b     | 160.510494 | 0.34850153 | 0.32803519 | 1.06239067 | 0.28805837 | 0.58169013 |
| Tshz2       | 2.44793771 | 0.34835942 | 0.29125961 | 1.19604441 | 0.23167923 | NA         |
| Faim2       | 2.51797737 | 0.34832585 | 0.33847536 | 1.02910251 | 0.30343151 | NA         |
| Hsph1       | 19354.2207 | 0.34806226 | 0.34831023 | 0.9992881  | 0.31765515 | 0.61159656 |
| Mecom       | 25.8928818 | 0.34783954 | 0.4284456  | 0.81186396 | 0.4168697  | 0.69852668 |
| Slco3a1     | 33.584408  | 0.34771707 | 0.43034345 | 0.80799897 | 0.41909118 | 0.69973018 |
| A930018P22f | 1.8582315  | 0.34770812 | 0.295739   | 1.1757263  | 0.23970427 | NA         |
| Spic        | 3828.27748 | 0.34766185 | 0.33209757 | 1.04686659 | 0.29516111 | 0.58982915 |
| Abcf3       | 4428.83514 | 0.34763281 | 0.17048091 | 2.03913045 | 0.04143701 | 0.19532548 |
| Bbs2        | 1067.11476 | 0.34745466 | 0.22120082 | 1.5707657  | 0.11623708 | 0.36215582 |
| Ints3       | 11532.2942 | 0.34738303 | 0.19327696 | 1.79733288 | 0.07228279 | 0.27429691 |
| Hdac8       | 614.506833 | 0.34735505 | 0.22684078 | 1.53127253 | 0.12570205 | 0.37885621 |
| Slc32a1     | 6.81982748 | 0.34734203 | 0.38481901 | 0.90261143 | 0.36673216 | 0.65694132 |
| Farp1       | 1596.3148  | 0.34728371 | 0.25002825 | 1.38897786 | 0.16483948 | 0.43811635 |
| Rraga       | 5958.48792 | 0.34708334 | 0.15649856 | 2.21780527 | 0.02656811 | 0.14758876 |
| Gpr107      | 6729.73447 | 0.34686163 | 0.17597316 | 1.9711053  | 0.04871183 | 0.21604611 |
| Tcea2       | 369.056872 | 0.3467882  | 0.33842303 | 1.02471808 | 0.30549623 | 0.59999644 |
| Pnliprp2    | 12.2341387 | 0.34651026 | 0.41891626 | 0.82715878 | 0.40814707 | 0.69198369 |
| Atp5g3      | 24137.7366 | 0.34617593 | 0.164363   | 2.10616703 | 0.03518985 | 0.17733647 |
| Tor1aip1    | 1485.64748 | 0.3458931  | 0.21282754 | 1.62522717 | 0.10411416 | 0.33939891 |
| Sell        | 4.18973868 | 0.34584981 | 0.29033478 | 1.1912104  | 0.233571   | NA         |
| Usp27x      | 346.032864 | 0.34579359 | 0.22652188 | 1.52653506 | 0.12687667 | 0.38060552 |
| 5830444B04f | 23.0367446 | 0.3456571  | 0.42256656 | 0.81799444 | 0.41336036 | 0.69566523 |
| Chpf2       | 808.422064 | 0.34554889 | 0.23065224 | 1.49813798 | 0.1340974  | 0.39132084 |
| AV039307    | 4.15637751 | 0.34541222 | 0.37000936 | 0.93352292 | 0.35055004 | NA         |
| Zw10        | 5232.03705 | 0.345278   | 0.1781809  | 1.93779475 | 0.05264827 | 0.22685875 |
| Tmem126a    | 2612.76483 | 0.34522521 | 0.16284731 | 2.11993189 | 0.03401179 | 0.17307505 |
| Ermp1       | 7631.02607 | 0.34512286 | 0.25999732 | 1.32740927 | 0.18437334 | 0.4644599  |
| BC030307    | 126.184697 | 0.3450168  | 0.28277456 | 1.22011256 | 0.22242221 | 0.5111405  |
| Wdr95       | 339.87765  | 0.34490984 | 0.37130885 | 0.92890283 | 0.35293945 | 0.64465132 |
| Gm12171     | 20.5207564 | 0.34490372 | 0.40779873 | 0.84576947 | 0.39768136 | 0.68380615 |
| Micall2     | 395.753653 | 0.34473353 | 0.36214664 | 0.95191695 | 0.3411391  | 0.63465177 |
| Tsc22d4     | 2131.52679 | 0.34469992 | 0.16461373 | 2.0939925  | 0.03626065 | 0.18058504 |
| Snord17     | 19.2160427 | 0.34461066 | 0.4179705  | 0.8244856  | 0.40966369 | 0.69284177 |
| Ctdspl      | 157.665633 | 0.34458765 | 0.40334371 | 0.85432757 | 0.39292352 | 0.68081934 |
| Trpm6       | 147.847188 | 0.34451635 | 0.4178453  | 0.82450695 | 0.40965157 | 0.69284177 |
| Bbs1        | 715.349706 | 0.34449175 | 0.33295796 | 1.03464039 | 0.30083689 | 0.59559316 |
| Gm4787      | 7.72215087 | 0.34442403 | 0.41853603 | 0.82292563 | 0.41055029 | 0.69313511 |
| Ooep        | 14319.6394 | 0.34434578 | 0.3029978  | 1.13646295 | 0.25576286 | 0.54856501 |
| Nudt1       | 1990.32101 | 0.34399256 | 0.20366876 | 1.6889805  | 0.09122317 | 0.31447827 |

|             |            |            |            |            |            |            |
|-------------|------------|------------|------------|------------|------------|------------|
| Ap3m2       | 982.397148 | 0.34397411 | 0.24886505 | 1.3821712  | 0.16691914 | 0.44143393 |
| 6330403K07F | 112.932666 | 0.3439234  | 0.28653995 | 1.20026334 | 0.23003708 | 0.52127633 |
| Erich6      | 2.96330522 | 0.34389022 | 0.34768826 | 0.98907631 | 0.32262581 | NA         |
| Ier3        | 327.751598 | 0.34387678 | 0.35400872 | 0.97137941 | 0.33135938 | 0.62452668 |
| AW495222    | 8.30209267 | 0.343754   | 0.4281591  | 0.80286511 | 0.4220527  | 0.70127884 |
| Pde3b       | 1041.81209 | 0.34350443 | 0.43227227 | 0.79464831 | 0.42681811 | 0.70402942 |
| Kdm4d       | 7.83457443 | 0.34344411 | 0.42784415 | 0.8027318  | 0.42212977 | 0.70127884 |
| BC051226    | 224.408461 | 0.34339426 | 0.29389067 | 1.16844219 | 0.24262844 | 0.53481431 |
| Insrr       | 5.27333318 | 0.34312896 | 0.405419   | 0.84635638 | 0.39735396 | NA         |
| Scamp1      | 2074.53967 | 0.34310408 | 0.20462506 | 1.67674517 | 0.09359232 | 0.3186567  |
| 9230105E05F | 3.01526619 | 0.343093   | 0.3457309  | 0.99237009 | 0.32101702 | NA         |
| Msantd1     | 17.4411771 | 0.34285089 | 0.42906734 | 0.7990608  | 0.42425516 | 0.70280233 |
| Mpzl2       | 12976.0837 | 0.34283114 | 0.21676136 | 1.58160637 | 0.11373946 | 0.35754242 |
| Gm13034     | 47.2151516 | 0.34267341 | 0.39594223 | 0.86546315 | 0.38678463 | 0.67567826 |
| Wisp3       | 20.3049279 | 0.34263781 | 0.43225615 | 0.79267307 | 0.42796833 | 0.70472095 |
| Calr        | 56589.9591 | 0.34246614 | 0.18809103 | 1.82074682 | 0.06864535 | 0.26645104 |
| Irf9        | 1480.86941 | 0.34242756 | 0.22118264 | 1.54816657 | 0.1215822  | 0.3713128  |
| Cox16       | 1257.22822 | 0.34236169 | 0.22098006 | 1.54928774 | 0.12131257 | 0.37070775 |
| 4930556M19  | 33.2019582 | 0.34231439 | 0.4222344  | 0.81072122 | 0.41752578 | 0.69868745 |
| Evi2a       | 1.64618917 | 0.34217672 | 0.26895085 | 1.27226487 | 0.20327903 | NA         |
| Desi1       | 2575.44151 | 0.34186898 | 0.16924154 | 2.02000634 | 0.04338273 | 0.20081191 |
| Cutc        | 363.670843 | 0.34150107 | 0.24532863 | 1.39201478 | 0.16391792 | 0.43656236 |
| Slc25a29    | 41.169004  | 0.34124482 | 0.3617391  | 0.94334514 | 0.34550439 | 0.63779826 |
| Thap7       | 738.805493 | 0.34081702 | 0.19954848 | 1.70794097 | 0.0876473  | 0.30830199 |
| 5730420D15I | 2.68897442 | 0.34080126 | 0.36514886 | 0.93332143 | 0.35065403 | NA         |
| Tmco1       | 4953.43382 | 0.34079234 | 0.16337072 | 2.08600625 | 0.03697806 | 0.18247163 |
| Cd14        | 30.8331341 | 0.34073399 | 0.43187125 | 0.78897124 | 0.43012882 | 0.70591345 |
| Ptpmt1      | 1945.59214 | 0.34071902 | 0.24919313 | 1.36728899 | 0.17153474 | 0.4479452  |
| Trim35      | 5711.66679 | 0.34048646 | 0.24800993 | 1.37287431 | 0.16979142 | 0.44511837 |
| Prkab1      | 2786.18681 | 0.34028438 | 0.22114002 | 1.5387734  | 0.12385963 | 0.37568579 |
| Nr2f2       | 38.1956428 | 0.34024599 | 0.42867108 | 0.79372276 | 0.42735685 | 0.70423083 |
| Alk         | 12.2374882 | 0.34023555 | 0.41005745 | 0.82972653 | 0.40669342 | 0.69067264 |
| Smpd2       | 1277.33769 | 0.34012745 | 0.17833137 | 1.90727772 | 0.05648463 | 0.23682732 |
| Nme5        | 22.3988645 | 0.34005093 | 0.41778034 | 0.8139467  | 0.41567548 | 0.69777304 |
| Gm17745     | 16.4484892 | 0.34001701 | 0.42994784 | 0.79083317 | 0.42904135 | 0.7048407  |
| Hgfac       | 2.34120884 | 0.34001589 | 0.31015838 | 1.09626538 | 0.27296266 | NA         |
| Shc2        | 365.373949 | 0.33997236 | 0.27334973 | 1.2437267  | 0.21360017 | 0.5003308  |
| Rab33b      | 619.096184 | 0.33988488 | 0.21875346 | 1.5537349  | 0.12024766 | 0.36901616 |
| Col6a4      | 32.9577407 | 0.33978934 | 0.42019688 | 0.80864319 | 0.41872042 | 0.69948665 |
| Ina         | 357.289556 | 0.33969974 | 0.3780086  | 0.89865612 | 0.36883586 | 0.65913197 |
| Mex3b       | 1146.34917 | 0.33958047 | 0.25339288 | 1.34013423 | 0.18020171 | 0.4587945  |

|             |            |            |            |            |            |            |
|-------------|------------|------------|------------|------------|------------|------------|
| 0610040B10F | 28.6870724 | 0.33922164 | 0.42150403 | 0.8047886  | 0.42094168 | 0.70091929 |
| Il31ra      | 2.92928817 | 0.33913593 | 0.34701434 | 0.9772966  | 0.32842234 | NA         |
| Minpp1      | 3141.91558 | 0.3391311  | 0.18163267 | 1.86712607 | 0.06188399 | 0.2506793  |
| Bola2       | 3340.10035 | 0.33901818 | 0.2337292  | 1.45047421 | 0.14692633 | 0.41138842 |
| Eml3        | 1758.24198 | 0.33894037 | 0.20521114 | 1.65166656 | 0.09860254 | 0.32850211 |
| Pnma3       | 32.5903518 | 0.33891276 | 0.41524023 | 0.81618479 | 0.41439445 | 0.69676294 |
| Rpl29       | 8445.5845  | 0.33872862 | 0.2722855  | 1.24402005 | 0.21349218 | 0.50028431 |
| Acrbp       | 1042.7227  | 0.33872489 | 0.24022928 | 1.41000665 | 0.15853772 | 0.4288771  |
| Mus81       | 914.824131 | 0.33872464 | 0.20284559 | 1.6698644  | 0.09494619 | 0.32174946 |
| BB019430    | 4.54944731 | 0.33871825 | 0.33923954 | 0.99846336 | 0.31805472 | NA         |
| 4931408D14I | 6.99491772 | 0.33864716 | 0.39865276 | 0.84947903 | 0.3956148  | 0.68266819 |
| Map7        | 6799.9445  | 0.33854793 | 0.29785874 | 1.13660569 | 0.25570316 | 0.54856501 |
| Dnajc15     | 2137.54491 | 0.33840869 | 0.21879273 | 1.54670904 | 0.12193342 | 0.37203601 |
| Rogdi       | 2314.26196 | 0.33840245 | 0.18327082 | 1.84646109 | 0.06482528 | 0.25789153 |
| Armc2       | 29.4820734 | 0.33812115 | 0.40392557 | 0.83708775 | 0.40254324 | 0.68709571 |
| Cacna1g     | 19.9801911 | 0.33807273 | 0.43225067 | 0.78212193 | 0.43414292 | 0.70858066 |
| Igf2bp2     | 11738.6207 | 0.33802823 | 0.18018519 | 1.87600456 | 0.06065465 | 0.24782988 |
| Fam19a3     | 7.29956606 | 0.33783563 | 0.40665311 | 0.83077105 | 0.40610298 | 0.68991262 |
| Dact2       | 2668.53424 | 0.33779075 | 0.19312615 | 1.74906784 | 0.08027929 | 0.29214885 |
| Zscan4e     | 21.7022656 | 0.33778087 | 0.40567912 | 0.83263066 | 0.40505306 | 0.68916712 |
| Trim11      | 2390.95878 | 0.33757514 | 0.20064408 | 1.68245751 | 0.09248016 | 0.31670534 |
| 1700019O17I | 12.1487481 | 0.33756733 | 0.40822678 | 0.82691127 | 0.40828736 | 0.69198369 |
| Pex19       | 5601.03279 | 0.33755569 | 0.15715513 | 2.14791395 | 0.03172059 | 0.16564369 |
| Figla       | 2.0547056  | 0.33744393 | 0.32072522 | 1.05212784 | 0.2927409  | NA         |
| Oser1       | 533.956479 | 0.33739957 | 0.18456323 | 1.82809743 | 0.06753493 | 0.26381203 |
| Adtrp       | 45.5290593 | 0.33735354 | 0.43048216 | 0.7836644  | 0.43323706 | 0.7083405  |
| Col16a1     | 73.0793839 | 0.33696106 | 0.41506467 | 0.81182785 | 0.41689042 | 0.69852668 |
| Pzp         | 424.207968 | 0.33679529 | 0.22513613 | 1.4959629  | 0.13466332 | 0.3921628  |
| Carhsp1     | 2886.33506 | 0.33667085 | 0.15193062 | 2.21595126 | 0.02669484 | 0.14799696 |
| 0610043K17F | 60.0819662 | 0.33660159 | 0.36159031 | 0.93089216 | 0.35190935 | 0.64414464 |
| D030025P21I | 22.482462  | 0.33654969 | 0.41799902 | 0.8051447  | 0.42073618 | 0.70091929 |
| AU018091    | 13416.3719 | 0.33647451 | 0.17459636 | 1.92715652 | 0.05396013 | 0.2301623  |
| Bbs7        | 764.126018 | 0.33641551 | 0.23008621 | 1.46212805 | 0.14370612 | 0.40532857 |
| Sertad2     | 3658.4901  | 0.33627143 | 0.22007387 | 1.52799348 | 0.12651416 | 0.37981113 |
| Ssr4        | 4225.13827 | 0.33625288 | 0.18264612 | 1.84100749 | 0.06562046 | 0.25939598 |
| Mlec        | 36985.0438 | 0.33612494 | 0.17392579 | 1.93257673 | 0.05328836 | 0.22884208 |
| Dynll1      | 12720.911  | 0.33609811 | 0.17949082 | 1.87250863 | 0.06113627 | 0.2490126  |
| Akt1s1      | 3078.71862 | 0.33604004 | 0.21133394 | 1.5900903  | 0.11181445 | 0.35361429 |
| Pgap2       | 2725.57442 | 0.33588208 | 0.22059525 | 1.52261703 | 0.12785455 | 0.38199155 |
| Rab3b       | 412.18908  | 0.33582398 | 0.31081874 | 1.08044958 | 0.27994203 | 0.5723512  |
| 1700080O16I | 81.209221  | 0.33555359 | 0.38356812 | 0.87482136 | 0.38167111 | 0.67065405 |

|             |            |            |            |            |            |            |
|-------------|------------|------------|------------|------------|------------|------------|
| Hexim1      | 5739.12551 | 0.33525815 | 0.26148248 | 1.28214383 | 0.1997922  | 0.48279318 |
| Mmp3        | 6.89409148 | 0.33522867 | 0.26466273 | 1.26662591 | NA         | NA         |
| Zfa-ps      | 3.32931844 | 0.33517798 | 0.35934969 | 0.93273486 | 0.35095688 | NA         |
| Wfdc9       | 6.55737578 | 0.33515958 | 0.38789067 | 0.86405682 | 0.38755668 | 0.67657598 |
| AW549542    | 37.1612651 | 0.33488739 | 0.3974691  | 0.8425495  | 0.39948044 | 0.68486983 |
| Ppm1h       | 302.515693 | 0.33476064 | 0.36286626 | 0.92254552 | 0.3562441  | 0.64764054 |
| 5930430L01F | 40.1359877 | 0.33467839 | 0.38601814 | 0.86700171 | 0.38594107 | 0.67503876 |
| Rasd1       | 63.6181103 | 0.33444426 | 0.36606974 | 0.91360806 | 0.36092283 | 0.6518071  |
| Toporsl     | 4.72991468 | 0.33436267 | 0.34189769 | 0.97796119 | 0.32809352 | NA         |
| Slc25a51    | 3241.2492  | 0.33426709 | 0.24175248 | 1.38268321 | 0.16676202 | 0.44135625 |
| Blcap       | 1616.82774 | 0.3342666  | 0.19942488 | 1.67615299 | 0.09370823 | 0.31888596 |
| Heph11      | 1.88885276 | 0.33422743 | 0.29663646 | 1.12672404 | 0.25985918 | NA         |
| Gm2762      | 4.8360308  | 0.33392348 | 0.39532704 | 0.84467655 | 0.39829146 | NA         |
| Elov15      | 9765.36973 | 0.33367603 | 0.24484393 | 1.36281114 | 0.17294204 | 0.45018776 |
| St6gal2     | 2.0632456  | 0.33361998 | 0.32210502 | 1.03574907 | 0.30031922 | NA         |
| Fam209      | 3.16126546 | 0.33357527 | 0.32524243 | 1.02562038 | 0.30507055 | NA         |
| Ano4        | 3.55206206 | 0.33345821 | 0.36054566 | 0.92487095 | 0.35503304 | NA         |
| Morn5       | 2.09072095 | 0.33345554 | 0.32484693 | 1.02650049 | 0.30465573 | NA         |
| Entpd7      | 612.862605 | 0.33343111 | 0.24736521 | 1.34793048 | 0.17768074 | 0.45514757 |
| Hcfc1r1     | 1844.2706  | 0.33321437 | 0.28463966 | 1.17065336 | 0.24173814 | 0.53421167 |
| Trpm2       | 4.94821487 | 0.33306122 | 0.3903679  | 0.85319829 | 0.39354935 | NA         |
| Gkn1        | 1.50890545 | 0.33303377 | 0.26625427 | 1.25081101 | 0.21100344 | NA         |
| Rtl1        | 1.50890545 | 0.33303377 | 0.26625427 | 1.25081101 | 0.21100344 | NA         |
| Tmprss12    | 140.051181 | 0.33300147 | 0.37270355 | 0.89347546 | 0.37160261 | 0.66164325 |
| Gm14023     | 17.0826866 | 0.33258433 | 0.4214697  | 0.78910615 | 0.43004997 | 0.70591084 |
| Tcf15       | 1464.32929 | 0.33258092 | 0.36143762 | 0.92016132 | 0.35748846 | 0.64865412 |
| Pgr15l      | 6.10367599 | 0.33245446 | 0.39912401 | 0.83296031 | 0.40486711 | 0.68915154 |
| Tg          | 7.44132251 | 0.33239251 | 0.42461856 | 0.7828026  | 0.43374304 | 0.70858066 |
| Dtymk       | 13063.2565 | 0.33231054 | 0.17961865 | 1.85008935 | 0.06430067 | 0.25672394 |
| Rbm4        | 123.422438 | 0.33223612 | 0.28410569 | 1.16941028 | 0.24223837 | 0.53458396 |
| Mrps26      | 2116.91746 | 0.33210953 | 0.17998633 | 1.84519306 | 0.06500946 | 0.25826729 |
| Dlx4        | 12.8941874 | 0.33205659 | 0.43225993 | 0.76818732 | 0.44237591 | 0.7159317  |
| 4930550C14F | 47.6144532 | 0.3320371  | 0.37049805 | 0.89619122 | 0.37015065 | 0.66041908 |
| Csnk2b      | 6782.64761 | 0.3320198  | 0.19355859 | 1.7153452  | 0.08628196 | 0.30529481 |
| Map1lc3b    | 6018.64702 | 0.33199296 | 0.24497671 | 1.35520216 | 0.17535316 | 0.45309298 |
| Arpp19      | 8685.82903 | 0.33178753 | 0.15843114 | 2.09420657 | 0.03624158 | 0.18058504 |
| Psmg2       | 3434.16709 | 0.33171339 | 0.20306108 | 1.63356457 | 0.10235031 | 0.33618991 |
| Ptprk       | 4062.33953 | 0.33170726 | 0.18186277 | 1.82394266 | 0.06816074 | 0.26505819 |
| Depdc7      | 1941.68493 | 0.33166151 | 0.16815721 | 1.97233003 | 0.04857194 | 0.21577978 |
| Ric8        | 4000.12452 | 0.33165903 | 0.18032324 | 1.83924732 | 0.06587882 | 0.26008669 |
| Dcakd       | 6910.63241 | 0.33153039 | 0.18901768 | 1.75396499 | 0.07943651 | 0.29073126 |

|             |            |            |            |            |            |            |
|-------------|------------|------------|------------|------------|------------|------------|
| Alyref2     | 241.436397 | 0.33147601 | 0.25259059 | 1.31230543 | 0.1894171  | 0.47114928 |
| Chp1        | 3614.28559 | 0.33128694 | 0.15221269 | 2.17647386 | 0.02951985 | 0.15748306 |
| Hhex        | 737.75939  | 0.33126123 | 0.27043201 | 1.2249335  | 0.22060028 | 0.50895393 |
| Masp2       | 382.8557   | 0.3311793  | 0.24640789 | 1.34402878 | 0.17893908 | 0.45698386 |
| Parp3       | 251.72824  | 0.33117664 | 0.37149611 | 0.89146733 | 0.37267851 | 0.66269681 |
| Fuca2       | 2549.13588 | 0.33116821 | 0.2225693  | 1.48793298 | 0.13676857 | 0.39489535 |
| 4930545H06l | 1.71555369 | 0.33096627 | 0.29250251 | 1.1314989  | 0.25784517 | NA         |
| Rab26       | 318.340319 | 0.33051039 | 0.25348944 | 1.30384286 | 0.19228717 | 0.4751259  |
| Clec3b      | 7.3819094  | 0.33050209 | 0.39014465 | 0.84712706 | 0.3969243  | 0.68311652 |
| Elf4        | 2340.36575 | 0.33033734 | 0.2323608  | 1.42165692 | 0.15512587 | 0.4237087  |
| Irak3       | 1694.85392 | 0.33033464 | 0.26931326 | 1.22658144 | 0.21997995 | 0.5086096  |
| Lamtor4     | 1956.54022 | 0.33029452 | 0.23315736 | 1.4166163  | 0.15659514 | 0.4257362  |
| Fbxo33      | 2684.56119 | 0.33028218 | 0.19540636 | 1.69023249 | 0.09098348 | 0.31400004 |
| Gdpd4       | 1.70839795 | 0.33009931 | 0.29230955 | 1.12927992 | 0.25877977 | NA         |
| Fzd1        | 69.4560672 | 0.33003844 | 0.43055789 | 0.76653672 | 0.44335701 | 0.71677356 |
| Pfn2        | 996.7897   | 0.33003233 | 0.28447446 | 1.16014752 | 0.24598875 | 0.53908837 |
| Igdcc4      | 768.657503 | 0.32991309 | 0.30091534 | 1.09636512 | 0.27291902 | 0.56619046 |
| Ankrd22     | 5.52225402 | 0.32990984 | 0.36446954 | 0.90517808 | 0.36537105 | NA         |
| Gfra2       | 20.5481175 | 0.32986544 | 0.42557135 | 0.77511195 | 0.43827351 | 0.71195982 |
| Arl2bp      | 3594.13253 | 0.3298585  | 0.24391646 | 1.35234211 | 0.1762659  | 0.45380054 |
| Akap7       | 1693.98256 | 0.32969806 | 0.258961   | 1.2731572  | 0.20296227 | 0.48733798 |
| Bcr         | 2254.52108 | 0.32967435 | 0.20868409 | 1.57977708 | 0.11415793 | 0.35801802 |
| Ubd         | 1288.29726 | 0.32952044 | 0.31773607 | 1.03708855 | 0.29969459 | 0.59454027 |
| Frmd4b      | 3424.49818 | 0.32932671 | 0.26389934 | 1.24792548 | 0.21205835 | 0.49874764 |
| Spaca7      | 7.34185193 | 0.32931516 | 0.40529405 | 0.81253391 | 0.41648533 | 0.69837863 |
| Zbtb1       | 2491.35874 | 0.32921411 | 0.22291619 | 1.47685153 | 0.13971544 | 0.39961648 |
| 4930453H23l | 3.92894912 | 0.3290619  | 0.28972485 | 1.13577383 | 0.25605123 | NA         |
| Cttn        | 12505.9297 | 0.32900107 | 0.15759845 | 2.0875908  | 0.03683476 | 0.18223429 |
| Zscan22     | 1136.84176 | 0.3289298  | 0.18684361 | 1.76045516 | 0.07833066 | 0.28826774 |
| Pbp2        | 4.78181583 | 0.32886082 | 0.39891401 | 0.82439025 | 0.40971786 | NA         |
| Neurl1a     | 1060.6143  | 0.32871523 | 0.261291   | 1.25804269 | 0.20837632 | 0.49427397 |
| Tdrd9       | 123.490546 | 0.32869735 | 0.38128484 | 0.86207819 | 0.38864449 | 0.6776332  |
| Map1a       | 1505.45783 | 0.32868149 | 0.32296991 | 1.01768455 | 0.30882789 | 0.60341532 |
| Klhl42      | 1976.71793 | 0.32860851 | 0.24888514 | 1.32032193 | 0.18672756 | 0.46781595 |
| Ppp1r3e     | 85.990787  | 0.32859474 | 0.42711649 | 0.76933284 | 0.44169575 | 0.71556426 |
| Wdr72       | 2.82418619 | 0.32850442 | 0.3185025  | 1.03140297 | 0.30235189 | NA         |
| Gdpgp1      | 1021.96345 | 0.32846724 | 0.21760645 | 1.50945544 | 0.13118243 | 0.38740968 |
| Fbxo32      | 43.0631535 | 0.32824443 | 0.40232905 | 0.81586061 | 0.41457986 | 0.69683651 |
| Nt5dc3      | 3245.83022 | 0.32816607 | 0.2241317  | 1.46416624 | 0.14314853 | 0.40437835 |
| Zbtb45      | 1591.89205 | 0.32795479 | 0.26469152 | 1.23900754 | 0.21534271 | 0.5026351  |
| Cdh5        | 1.86914719 | 0.32777198 | 0.29466021 | 1.11237269 | 0.26597794 | NA         |

|             |            |            |            |            |            |            |
|-------------|------------|------------|------------|------------|------------|------------|
| Tbx15       | 495.05613  | 0.32765052 | 0.41385429 | 0.79170502 | 0.42853269 | 0.7047819  |
| C130021I20R | 7.58428249 | 0.32763769 | 0.40064075 | 0.81778423 | 0.4134804  | 0.69566523 |
| Nck1        | 2282.36454 | 0.32757694 | 0.16640939 | 1.96850033 | 0.0490105  | 0.21670806 |
| Lipo1       | 1043.23656 | 0.32740863 | 0.29427374 | 1.11259887 | 0.26588075 | 0.55798861 |
| Ccdc73      | 374.308433 | 0.32739755 | 0.26521062 | 1.23448129 | 0.21702361 | 0.50454989 |
| Al462493    | 1296.7965  | 0.32709396 | 0.23811044 | 1.37370691 | 0.16953269 | 0.44473733 |
| Mageb3      | 5.57594435 | 0.3270838  | 0.3818496  | 0.85657756 | 0.39167839 | NA         |
| Hdac6       | 6684.30097 | 0.32706262 | 0.21571354 | 1.51618952 | 0.12947144 | 0.38455938 |
| Nacc2       | 900.938702 | 0.32696617 | 0.30565176 | 1.06973429 | 0.28473893 | 0.57768754 |
| Zfp142      | 2223.76499 | 0.32670186 | 0.25940929 | 1.25940693 | 0.20788339 | 0.49345463 |
| Catsper2    | 216.153506 | 0.32659099 | 0.24146705 | 1.35252819 | 0.17620641 | 0.45380054 |
| Top2b       | 6519.39556 | 0.32649234 | 0.25464939 | 1.28212496 | 0.19979881 | 0.48279318 |
| Asxl3       | 53.5912526 | 0.32639209 | 0.41656308 | 0.78353581 | 0.43331253 | 0.7083405  |
| Art4        | 7.5103253  | 0.32619427 | 0.39577136 | 0.82419877 | 0.40982662 | 0.69289126 |
| Vmn1r14     | 2.00103683 | 0.32608662 | 0.29162116 | 1.11818571 | 0.26348769 | NA         |
| Fblim1      | 15638.3638 | 0.32596843 | 0.21376434 | 1.52489623 | 0.12728498 | 0.38116865 |
| lpmk        | 9092.63013 | 0.32589783 | 0.21997231 | 1.48154026 | 0.13846267 | 0.39777094 |
| Cdsn        | 100.804834 | 0.32587015 | 0.29685619 | 1.09773741 | 0.27231917 | 0.56570069 |
| Fgfbp1      | 203.202377 | 0.32584304 | 0.41194606 | 0.79098471 | 0.42895291 | 0.7048133  |
| Grid2ip     | 45.1497038 | 0.32563269 | 0.41989642 | 0.77550718 | 0.43804003 | 0.7119144  |
| Yaf2        | 892.833837 | 0.32555885 | 0.29793578 | 1.09271487 | 0.27451901 | 0.56715903 |
| lvns1abp    | 22009.1922 | 0.32555847 | 0.29024974 | 1.12164947 | 0.26201151 | 0.55435932 |
| Lrrc42      | 4353.09535 | 0.32552413 | 0.21003422 | 1.5498623  | 0.12117457 | 0.37057733 |
| 4930407I10R | 2.23285839 | 0.32536676 | 0.34964479 | 0.93056372 | 0.35207929 | NA         |
| Crlf1       | 70.0622053 | 0.3251733  | 0.42821443 | 0.75937024 | 0.44763111 | 0.72071395 |
| Man1c1      | 604.12855  | 0.32505567 | 0.29900944 | 1.08710837 | 0.27698892 | 0.56941395 |
| Vcp         | 22511.9247 | 0.32499325 | 0.14765858 | 2.2009777  | 0.0277376  | 0.15193025 |
| Gm5039      | 108.193967 | 0.32482247 | 0.43111821 | 0.75344178 | 0.45118448 | 0.72303894 |
| A930005H10  | 247.47607  | 0.32479551 | 0.29085988 | 1.11667346 | 0.26413397 | 0.55578402 |
| Phox2a      | 134.755832 | 0.3247256  | 0.35429514 | 0.91653981 | 0.35938384 | 0.65018613 |
| Krt33a      | 1.72270943 | 0.32470795 | 0.29011058 | 1.1192558  | 0.26303103 | NA         |
| Erich5      | 3.91939607 | 0.32467892 | 0.38810118 | 0.83658316 | 0.40282691 | NA         |
| Chrdl1      | 1.72094778 | 0.32450824 | 0.29006272 | 1.11875197 | 0.26324597 | NA         |
| Nfkbie      | 187.973185 | 0.3244335  | 0.25391435 | 1.27772809 | 0.20134532 | 0.48541272 |
| Slc10a4     | 2.68072491 | 0.32436355 | 0.33563887 | 0.9664064  | 0.33384086 | NA         |
| Atp6v0a2    | 3179.6628  | 0.32433594 | 0.19100036 | 1.6980907  | 0.08949064 | 0.31119611 |
| 1110046J04R | 6.09043318 | 0.32426595 | 0.40030382 | 0.81004961 | 0.41791166 | 0.69881121 |
| Grhl2       | 666.57179  | 0.32418053 | 0.36547373 | 0.88701459 | 0.37507105 | 0.66485009 |
| Amh         | 26.8735227 | 0.32412842 | 0.41302841 | 0.7847606  | 0.43259395 | 0.70789874 |
| Ankrd33b    | 440.27013  | 0.32412737 | 0.3699816  | 0.87606349 | 0.38099552 | 0.66993005 |
| Nfyc        | 2598.32281 | 0.32394214 | 0.20707275 | 1.56438805 | 0.11772646 | 0.3642587  |



|             |            |            |            |            |            |            |
|-------------|------------|------------|------------|------------|------------|------------|
| Wiz         | 4259.99879 | 0.32381739 | 0.25044441 | 1.2929711  | 0.19602106 | 0.47907016 |
| Abhd4       | 4744.76599 | 0.32375531 | 0.15719452 | 2.05958397 | 0.03943833 | 0.18970166 |
| Btbd9       | 1359.07602 | 0.32339606 | 0.21539344 | 1.50142022 | 0.13324691 | 0.39030376 |
| Sult2a3     | 4.59712058 | 0.32334721 | 0.33215527 | 0.97348209 | 0.33031376 | NA         |
| Zfp672      | 215.661101 | 0.32305768 | 0.28931345 | 1.11663553 | 0.26415019 | 0.55578402 |
| 2610035F20F | 26.1777108 | 0.32301885 | 0.42950967 | 0.7520642  | 0.45201245 | 0.72396798 |
| Folh1       | 34.1689816 | 0.32298936 | 0.42833605 | 0.75405598 | 0.45081561 | 0.7229937  |
| Slc44a4     | 637.34268  | 0.32286462 | 0.22209928 | 1.45369506 | 0.14603087 | 0.40984047 |
| Aig1        | 353.483454 | 0.32269729 | 0.29698138 | 1.086591   | 0.2772176  | 0.56955371 |
| Xkr7        | 3.52239675 | 0.32267653 | 0.38153484 | 0.84573282 | 0.39770181 | NA         |
| Lymr2       | 1080.47821 | 0.32266268 | 0.23698703 | 1.36152043 | 0.17334928 | 0.45071973 |
| 1700016H13I | 12.1128374 | 0.32265361 | 0.4317732  | 0.74727569 | 0.45489716 | 0.72540051 |
| Ehd1        | 10351.0809 | 0.32255745 | 0.20882746 | 1.54461225 | 0.12244008 | 0.37298055 |
| 1500004A13F | 2.47554782 | 0.32212413 | 0.33333021 | 0.96638145 | 0.33385334 | NA         |
| Toe1        | 3234.43159 | 0.32199578 | 0.18472583 | 1.74310106 | 0.08131596 | 0.29469694 |
| Lrrc16b     | 57.5331444 | 0.32184769 | 0.37406295 | 0.8604105  | 0.3895628  | 0.67794934 |
| Tmem127     | 2830.35844 | 0.32173405 | 0.19417168 | 1.65695666 | 0.09752824 | 0.32644461 |
| Vgll1       | 2.76286932 | 0.32161592 | 0.3003754  | 1.07071323 | 0.28429839 | NA         |
| Orai1       | 799.504302 | 0.32161453 | 0.20714898 | 1.55257598 | 0.12052447 | 0.36940975 |
| Yipf1       | 2050.45801 | 0.32160734 | 0.22171885 | 1.45051873 | 0.14691392 | 0.41138842 |
| AF251705    | 4.64534751 | 0.32146015 | 0.36341926 | 0.88454352 | 0.37640288 | NA         |
| Sparcl1     | 47.5024446 | 0.3213651  | 0.41012487 | 0.78357867 | 0.43328738 | 0.7083405  |
| Ccpg1       | 5597.40478 | 0.3213292  | 0.26618498 | 1.20716504 | 0.22736859 | 0.51753644 |
| Hes1        | 4032.89166 | 0.32120586 | 0.22568671 | 1.42323782 | 0.15466723 | 0.42315799 |
| Ddx43       | 1008.90546 | 0.32082584 | 0.18419109 | 1.7418098  | 0.08154173 | 0.29523992 |
| Mir541      | 1.57165459 | 0.32080927 | 0.26203431 | 1.22430257 | 0.22083811 | NA         |
| Osbp17      | 2885.2372  | 0.32070668 | 0.21418959 | 1.4973028  | 0.13431449 | 0.39168943 |
| Aldh1l2     | 496.626452 | 0.32066713 | 0.27496098 | 1.1662278  | 0.24352236 | 0.53577799 |
| Trim36      | 201.052658 | 0.32061929 | 0.40832327 | 0.78520946 | 0.43233077 | 0.70770271 |
| Cpm         | 33.7266726 | 0.3205569  | 0.39409867 | 0.81339248 | 0.41599307 | 0.69808009 |
| Lum         | 3.73103671 | 0.32054733 | 0.33977606 | 0.94340761 | 0.34547245 | NA         |
| Mdh2        | 21820.9291 | 0.32030381 | 0.18354851 | 1.74506353 | 0.08097381 | 0.29414243 |
| Med7        | 3943.61544 | 0.32030092 | 0.19342223 | 1.65596747 | 0.09772841 | 0.3266927  |
| Galnt13     | 7.88823953 | 0.3202749  | 0.40038305 | 0.79992124 | 0.42375643 | 0.70246629 |
| Slc41a1     | 4543.43515 | 0.32012884 | 0.21476269 | 1.49061664 | 0.13606217 | 0.39391677 |
| Dcaf6       | 2624.70037 | 0.32012855 | 0.19818128 | 1.61533196 | 0.10623883 | 0.34347609 |
| H2-M10.4    | 8.81863663 | 0.32006402 | 0.36210139 | 0.88390718 | 0.37674632 | 0.66660394 |
| Ptplad2     | 65.2603664 | 0.32005224 | 0.38282161 | 0.83603494 | 0.40313525 | 0.68755826 |
| Avpr2       | 2.34772186 | 0.32003825 | 0.308788   | 1.03643356 | 0.29999992 | NA         |
| 9930104L06F | 1336.35577 | 0.31990767 | 0.18107348 | 1.76672846 | 0.07727371 | 0.28561324 |
| 2610002J02R | 901.577218 | 0.31986894 | 0.21394747 | 1.49508169 | 0.13489312 | 0.39242882 |

|          |            |            |            |            |            |            |
|----------|------------|------------|------------|------------|------------|------------|
| Shroom4  | 179.433077 | 0.31959471 | 0.4001891  | 0.79860925 | 0.42451702 | 0.70293777 |
| Slc4a2   | 1284.33888 | 0.31937873 | 0.26259577 | 1.21623715 | 0.2238946  | 0.51323805 |
| Rhox2e   | 1.67614255 | 0.3191065  | 0.28883784 | 1.10479464 | 0.26924858 | NA         |
| Ctsl     | 21360.8402 | 0.3190495  | 0.22230209 | 1.4352069  | 0.15122815 | 0.41838967 |
| Gfra3    | 35.9417797 | 0.31900802 | 0.4053465  | 0.7870008  | 0.4312814  | 0.70688509 |
| Utf1     | 2522.1499  | 0.31897855 | 0.33834275 | 0.94276751 | 0.34579983 | 0.63790477 |
| Dok4     | 162.861871 | 0.31894841 | 0.27877553 | 1.14410473 | 0.25258021 | 0.54598821 |
| Purg     | 431.886165 | 0.31876904 | 0.25216305 | 1.2641386  | 0.20618028 | 0.49102568 |
| H2-T22   | 5.16357933 | 0.31876871 | 0.37085453 | 0.85955187 | 0.39003612 | NA         |
| Trpv1    | 12.8312026 | 0.31870513 | 0.42432986 | 0.75107874 | 0.45260527 | 0.72421877 |
| Hoxd1    | 27.9350681 | 0.31868984 | 0.42742703 | 0.74560057 | 0.45590874 | 0.72630896 |
| Mycbp2   | 3752.96124 | 0.31865144 | 0.28147341 | 1.13208362 | 0.25759928 | 0.55011348 |
| Fbln7    | 51.4889839 | 0.31863552 | 0.36965312 | 0.8619852  | 0.38869566 | 0.67764644 |
| Lepr     | 85.7709623 | 0.31805675 | 0.41677182 | 0.76314362 | 0.44537775 | 0.71865423 |
| Pi16     | 9.4683712  | 0.31804391 | 0.43121856 | 0.73754689 | 0.46078984 | 0.73116428 |
| Cyp4f17  | 477.666517 | 0.3180073  | 0.2407548  | 1.32087627 | 0.18654262 | 0.46766473 |
| Tpbg     | 1593.16145 | 0.31799411 | 0.25732181 | 1.23578372 | 0.21653897 | 0.50379974 |
| Ppap2b   | 3114.50029 | 0.31793708 | 0.22504264 | 1.41278594 | 0.15771867 | 0.42767192 |
| Scgb1c1  | 18.8576551 | 0.31790541 | 0.43199112 | 0.73590728 | 0.46178713 | 0.73195919 |
| Slc2a13  | 2.33588842 | 0.31790172 | 0.33403932 | 0.95168952 | 0.34125446 | NA         |
| Asphd1   | 4.0676435  | 0.31772239 | 0.36404772 | 0.8727493  | 0.38279974 | NA         |
| Ahcyl2   | 3680.40641 | 0.31748666 | 0.24378117 | 1.30234282 | 0.19279922 | 0.47556451 |
| BC031181 | 3241.10593 | 0.31746617 | 0.18458009 | 1.71993723 | 0.08544385 | 0.30334471 |
| Nkg7     | 6.4463748  | 0.31736593 | 0.36589296 | 0.86737371 | 0.38573728 | 0.67491005 |
| Tusc2    | 1598.85615 | 0.31732223 | 0.18117642 | 1.75145441 | 0.07986767 | 0.29155449 |
| Cxcr5    | 2.01529446 | 0.317317   | 0.31419982 | 1.00992101 | 0.31253313 | NA         |
| Prmt6    | 2188.00915 | 0.31731262 | 0.17943344 | 1.76841406 | 0.07699171 | 0.28493528 |
| Ammecr1l | 3059.69934 | 0.31730872 | 0.20735612 | 1.53025972 | 0.12595245 | 0.37885621 |
| Max      | 5680.26476 | 0.31729985 | 0.15645785 | 2.02802125 | 0.04255808 | 0.19862566 |
| Chuk     | 7406.05109 | 0.31719357 | 0.1784094  | 1.77789721 | 0.07542074 | 0.28085917 |
| Ccdc114  | 367.075357 | 0.31715459 | 0.2477993  | 1.27988496 | 0.2005856  | 0.48436526 |
| Cep76    | 2936.89071 | 0.31707499 | 0.24161632 | 1.31230783 | 0.18941629 | 0.47114928 |
| Rorb     | 1.42358269 | 0.31697677 | 0.26099288 | 1.2145035  | 0.22455551 | NA         |
| Atp13a2  | 2337.64439 | 0.31691344 | 0.19747    | 1.60486881 | 0.10852268 | 0.34810219 |
| Fam222b  | 2025.33172 | 0.31661083 | 0.2611356  | 1.21243838 | 0.22534462 | 0.5148133  |
| Zfp398   | 439.790086 | 0.31655312 | 0.22746921 | 1.39163059 | 0.16403429 | 0.43679747 |
| H1foo    | 2.82388246 | 0.31653069 | 0.34560218 | 0.91588162 | 0.35972899 | NA         |
| Cabp5    | 1.8960085  | 0.31649269 | 0.2900989  | 1.09098205 | 0.27528078 | NA         |
| Gramd1b  | 1752.74828 | 0.31646362 | 0.21401125 | 1.47872424 | 0.13921403 | 0.39898957 |
| Atl1     | 272.252717 | 0.31615087 | 0.27121656 | 1.16567687 | 0.24374512 | 0.53593585 |
| Rarb     | 46.0636272 | 0.31603949 | 0.42231144 | 0.74835644 | 0.45424519 | 0.72512943 |

|             |            |            |            |            |            |            |
|-------------|------------|------------|------------|------------|------------|------------|
| Ltf         | 1.89232222 | 0.31587783 | 0.31853289 | 0.99166472 | 0.32136111 | NA         |
| Tuba4a      | 11371.3496 | 0.31575749 | 0.21764231 | 1.45080933 | 0.14683296 | 0.4113492  |
| Cdpf1       | 869.716551 | 0.31554098 | 0.23264723 | 1.35630659 | 0.17500164 | 0.45297112 |
| Emid1       | 113.663577 | 0.31553765 | 0.34997955 | 0.90158881 | 0.36727534 | 0.65733265 |
| Wispl       | 19.0854169 | 0.31542532 | 0.40444533 | 0.77989607 | NA         | NA         |
| Epb4.1l3    | 1024.90635 | 0.31531739 | 0.32625647 | 0.96647092 | 0.33380859 | 0.62713382 |
| Gulp1       | 432.238945 | 0.31525489 | 0.36360933 | 0.86701539 | 0.38593358 | 0.67503876 |
| Paf1        | 4790.8345  | 0.31515457 | 0.16819063 | 1.87379387 | 0.06095884 | 0.24855888 |
| Tshr        | 3.33372112 | 0.31484961 | 0.35074372 | 0.89766286 | 0.36936532 | NA         |
| Vkorc1      | 1173.9644  | 0.31467558 | 0.20287231 | 1.55110168 | 0.12087732 | 0.36988649 |
| 1700008O03l | 190.849137 | 0.31459606 | 0.25306276 | 1.24315429 | 0.21381098 | 0.50074919 |
| Slc15a2     | 322.845684 | 0.31457346 | 0.32903528 | 0.95604781 | 0.33904808 | 0.63270101 |
| Ano6        | 3416.07179 | 0.31432957 | 0.24868656 | 1.26395884 | 0.2062448  | 0.49102568 |
| Mrps25      | 3117.12336 | 0.31405212 | 0.18410342 | 1.70584615 | 0.08803673 | 0.30890324 |
| Amfr        | 2557.48395 | 0.3140309  | 0.24723677 | 1.27016258 | 0.20402672 | 0.48902891 |
| Airn        | 9.35431703 | 0.3139747  | 0.42738545 | 0.7346406  | 0.4625584  | 0.73263219 |
| Cdhr2       | 39.4103867 | 0.31362285 | 0.40233136 | 0.77951381 | 0.4356771  | 0.70987111 |
| Igflr1      | 131.089044 | 0.31356894 | 0.27026524 | 1.16022667 | 0.24595653 | 0.53908837 |
| Gm6225      | 7.37470497 | 0.31355442 | 0.40812662 | 0.76827731 | 0.44232245 | 0.7159317  |
| Ebp         | 4428.89289 | 0.31325706 | 0.22367673 | 1.40049017 | 0.16136658 | 0.43228454 |
| H2-D1       | 464.87193  | 0.31321889 | 0.28219066 | 1.10995486 | 0.26701848 | 0.55962323 |
| Fcrls       | 1.72332346 | 0.31318367 | 0.28936902 | 1.08229855 | 0.27911989 | NA         |
| Car4        | 6.12061662 | 0.31315232 | 0.37285513 | 0.83987666 | 0.40097755 | 0.68628679 |
| Agbl3       | 49.9115971 | 0.31308816 | 0.38971144 | 0.80338457 | 0.42175249 | 0.70123736 |
| Mettl21a    | 863.057017 | 0.31291627 | 0.18580912 | 1.6840738  | 0.09216741 | 0.3161216  |
| Al182371    | 21.911364  | 0.31286614 | 0.40894537 | 0.76505609 | 0.44423814 | 0.71760126 |
| Ankrd9      | 812.915945 | 0.31284904 | 0.19924902 | 1.57014093 | 0.11638233 | 0.3623426  |
| Fbn2        | 65.3912853 | 0.31278992 | 0.39517831 | 0.79151591 | 0.428643   | 0.7047819  |
| Ap4m1       | 1970.02188 | 0.31264756 | 0.19418007 | 1.61009093 | 0.10737801 | 0.34592519 |
| Aph         | 1.49635562 | 0.3125862  | 0.25932555 | 1.2053814  | 0.2280561  | NA         |
| Ptgs1       | 77.998352  | 0.31251412 | 0.34080959 | 0.91697572 | NA         | NA         |
| Serpinb10   | 2.15196415 | 0.31243982 | 0.30443679 | 1.02628801 | 0.30475585 | NA         |
| Ceacam16    | 53.9873928 | 0.31237994 | 0.41642162 | 0.75015302 | 0.45316255 | 0.72431158 |
| Grcc10      | 3095.01718 | 0.31231396 | 0.24998743 | 1.24931865 | 0.21154855 | 0.49812885 |
| Gm3139      | 2.74468876 | 0.31231311 | 0.292419   | 1.06803289 | 0.28550567 | NA         |
| Ccdc134     | 763.005855 | 0.31224836 | 0.21977891 | 1.42073853 | 0.15539279 | 0.4238164  |
| Pf4         | 9.30266298 | 0.3121469  | 0.41834652 | 0.74614437 | 0.45558021 | 0.72604303 |
| 3830406C13F | 671.138003 | 0.31203176 | 0.1884035  | 1.65618877 | 0.0976836  | 0.3266927  |
| BC022687    | 380.471228 | 0.31171716 | 0.25178477 | 1.23803025 | 0.21570485 | 0.5027617  |
| Reg4        | 2.08895929 | 0.31168372 | 0.31653672 | 0.98466844 | 0.32478696 | NA         |
| 2700094K13F | 14319.9443 | 0.31167292 | 0.2044357  | 1.52455233 | 0.1273708  | 0.38135218 |

|             |            |            |            |            |            |            |
|-------------|------------|------------|------------|------------|------------|------------|
| Mst1        | 921.344216 | 0.31163332 | 0.26504461 | 1.17577686 | 0.23968405 | 0.53163981 |
| Ppcs        | 1958.33975 | 0.31156281 | 0.22217105 | 1.40235556 | 0.1608091  | 0.43208565 |
| A930017M01  | 5.77275446 | 0.31153932 | 0.3492765  | 0.89195614 | 0.37241644 | NA         |
| F12         | 6.7910829  | 0.31144639 | 0.4203057  | 0.74099968 | 0.45869364 | 0.72921128 |
| Tssk4       | 3.03859097 | 0.31105117 | 0.34670364 | 0.89716732 | 0.36962964 | NA         |
| Wbp5        | 9668.25126 | 0.31104849 | 0.16914819 | 1.83891109 | 0.06592826 | 0.26019024 |
| Dennd2a     | 2715.97646 | 0.31053766 | 0.19716194 | 1.57503851 | 0.11524755 | 0.3601547  |
| Zfp423      | 167.289149 | 0.3105308  | 0.40995866 | 0.75746856 | 0.4487692  | 0.72156136 |
| Aak1        | 3583.17227 | 0.31049562 | 0.25670683 | 1.20953391 | 0.22645779 | 0.51667329 |
| Mycbp       | 2147.21225 | 0.31045812 | 0.21112192 | 1.47051575 | 0.14142212 | 0.40183728 |
| Dpf1        | 721.477689 | 0.31041597 | 0.28704715 | 1.0814111  | 0.27951429 | 0.57200243 |
| Atg3        | 2352.98619 | 0.31038406 | 0.17841491 | 1.73967557 | 0.081916   | 0.29593522 |
| C1ql2       | 22.7716759 | 0.31036204 | 0.41835289 | 0.74186661 | 0.45816816 | 0.72882294 |
| Gm11190     | 15.0094299 | 0.31028179 | 0.42466118 | 0.73065728 | 0.46498851 | 0.73410475 |
| Scn4b       | 30.3330946 | 0.3101164  | 0.38662831 | 0.80210473 | 0.42249238 | 0.70164235 |
| 2410017117R | 94.1070025 | 0.30993809 | 0.36356058 | 0.85250741 | 0.39393253 | 0.68150459 |
| Cs          | 27919.4629 | 0.30985947 | 0.18357403 | 1.68792645 | 0.09142535 | 0.31492289 |
| Cxx1a       | 32.5194623 | 0.30976446 | 0.39514175 | 0.78393249 | 0.43307972 | 0.70818326 |
| Gm16039     | 259.700589 | 0.3097546  | 0.22590351 | 1.37118101 | 0.17031854 | 0.44582117 |
| Fsbp        | 157.423587 | 0.30968803 | 0.27510092 | 1.12572519 | 0.26028186 | 0.5523497  |
| Gpr116      | 63.7680309 | 0.30968208 | 0.40531951 | 0.76404435 | 0.44484082 | 0.71820292 |
| Gm15133     | 14.223975  | 0.30947238 | 0.36915954 | 0.83831609 | 0.4018532  | 0.68675204 |
| Wdr35       | 4966.27227 | 0.30943972 | 0.21354069 | 1.4490902  | 0.14731239 | 0.41202429 |
| Neb         | 398.208013 | 0.30943436 | 0.37084901 | 0.83439447 | 0.40405873 | 0.68846147 |
| Tbr1        | 3.90508459 | 0.3094091  | 0.38298325 | 0.80789199 | 0.41915276 | NA         |
| Fam43a      | 1659.76647 | 0.30936947 | 0.1902742  | 1.62591391 | 0.10396797 | 0.33930559 |
| Prkd1       | 244.686315 | 0.30933693 | 0.40374102 | 0.76617664 | 0.44357121 | 0.71689626 |
| Ccdc97      | 2177.8764  | 0.3092763  | 0.20974591 | 1.47452841 | 0.14033938 | 0.4004436  |
| Mir3091     | 16.1245777 | 0.30926594 | 0.42617735 | 0.72567429 | 0.46803847 | 0.7360836  |
| Fam65b      | 5.83801407 | 0.30925449 | 0.38070216 | 0.81232661 | 0.41660425 | NA         |
| BC033916    | 1074.80411 | 0.30912639 | 0.18956495 | 1.63071488 | 0.1029505  | 0.33719106 |
| Chchd7      | 1132.9657  | 0.30909675 | 0.22992261 | 1.34435123 | 0.17883484 | 0.45692097 |
| Fam219b     | 1795.23035 | 0.30898483 | 0.1908309  | 1.61915513 | 0.10541389 | 0.34181621 |
| Smyd2       | 3453.70051 | 0.30889534 | 0.25348259 | 1.21860574 | 0.22299387 | 0.51207347 |
| Irs1        | 83.5287446 | 0.30883457 | 0.36842378 | 0.83825903 | 0.40188524 | 0.68675204 |
| D14Ertd670e | 7.05092553 | 0.30875928 | 0.39249323 | 0.78666143 | 0.43148009 | 0.70688509 |
| D130020L05F | 148.303131 | 0.30875201 | 0.30607468 | 1.00874732 | 0.31309583 | 0.60778346 |
| Gimap9      | 287.013858 | 0.30867685 | 0.22695195 | 1.36009778 | 0.17379898 | 0.45100512 |
| Dio3os      | 32.1905577 | 0.30862877 | 0.4069278  | 0.7584362  | 0.44818989 | 0.72108696 |
| Slx1b       | 1487.54087 | 0.30860757 | 0.20613219 | 1.49713424 | 0.13435833 | 0.39168943 |
| Il27ra      | 126.477424 | 0.30833923 | 0.38792498 | 0.79484241 | 0.42670518 | 0.70402942 |

|             |            |            |            |            |            |            |
|-------------|------------|------------|------------|------------|------------|------------|
| Pam         | 970.816473 | 0.30811233 | 0.29687185 | 1.03786309 | 0.2993338  | 0.59404542 |
| Yipf3       | 1769.8626  | 0.30788964 | 0.20113418 | 1.53076734 | 0.1258269  | 0.37885621 |
| Apbb3       | 791.521001 | 0.30765535 | 0.18923137 | 1.62581583 | 0.10398884 | 0.33930559 |
| Zscan29     | 989.987454 | 0.30750834 | 0.20426231 | 1.50545806 | 0.13220635 | 0.38856271 |
| Zc3h12d     | 2.1859812  | 0.3073423  | 0.30162325 | 1.01896089 | 0.30822153 | NA         |
| Mios        | 2086.77975 | 0.30719156 | 0.2438655  | 1.25967618 | 0.2077862  | 0.49332568 |
| Gng10       | 1564.55334 | 0.30709988 | 0.2933071  | 1.04702505 | 0.29508803 | 0.58975889 |
| Art5        | 139.683509 | 0.30699207 | 0.36501231 | 0.8410458  | 0.40032227 | 0.68539722 |
| Rai1        | 1322.98331 | 0.30691119 | 0.26763388 | 1.1467576  | 0.25148182 | 0.5450894  |
| H19         | 220.926065 | 0.30683045 | 0.40171115 | 0.76380865 | 0.44498128 | 0.71835398 |
| Tbata       | 7.9669956  | 0.30678513 | 0.35929087 | 0.85386286 | 0.39318098 | 0.6808762  |
| Dvl3        | 1817.11538 | 0.30676996 | 0.25460304 | 1.20489512 | 0.22824379 | 0.51887234 |
| Ifi27       | 228.526206 | 0.30673181 | 0.40050196 | 0.76586843 | 0.44375459 | 0.71711081 |
| Tom6        | 7786.37111 | 0.3066442  | 0.23114178 | 1.32664983 | 0.18462455 | 0.46455672 |
| 1600023N17I | 14.5047126 | 0.30603054 | 0.4319675  | 0.70845733 | 0.4786613  | 0.74302874 |
| Prcp        | 3023.02959 | 0.30601538 | 0.19751006 | 1.54936607 | 0.12129374 | 0.37070775 |
| 1700102H20I | 33.7940522 | 0.30594891 | 0.38067359 | 0.80370407 | 0.4215679  | 0.70108061 |
| Cpne4       | 4.28586216 | 0.30594787 | 0.27887357 | 1.09708451 | NA         | NA         |
| Gm12505     | 3.38304107 | 0.3059396  | 0.3457751  | 0.8847936  | 0.37626796 | NA         |
| Dcaf7       | 8117.50723 | 0.30588848 | 0.20470004 | 1.49432547 | 0.13509057 | 0.3925983  |
| Pip4k2c     | 7362.74049 | 0.30577301 | 0.15995499 | 1.91161906 | 0.05592507 | 0.2354971  |
| Tmod3       | 6973.71844 | 0.3056656  | 0.24024499 | 1.27230792 | 0.20326374 | 0.48772633 |
| Phkg2       | 2063.59745 | 0.30565675 | 0.20706252 | 1.47615682 | 0.1399018  | 0.39979382 |
| Vegfc       | 930.032692 | 0.30565419 | 0.33264676 | 0.91885513 | 0.35817135 | 0.64926373 |
| Heatr9      | 2.79162706 | 0.30537656 | 0.34225868 | 0.89223905 | 0.37226482 | NA         |
| Hmox2       | 3366.23809 | 0.3051345  | 0.19295481 | 1.58137811 | 0.11379161 | 0.35761218 |
| Ap5s1       | 421.60918  | 0.30505448 | 0.23273752 | 1.31072325 | 0.18995128 | 0.47164815 |
| Sertm1      | 63.3905718 | 0.3048195  | 0.41517581 | 0.73419379 | 0.46283064 | 0.73275933 |
| Pdcd6ip     | 8516.66441 | 0.30474691 | 0.20690937 | 1.47285216 | 0.1407909  | 0.401182   |
| Cyth2       | 3791.73484 | 0.30464332 | 0.18181149 | 1.67559995 | 0.09381658 | 0.3190125  |
| Fev         | 2.14480841 | 0.30458367 | 0.30148697 | 1.01027141 | 0.31236527 | NA         |
| Sri         | 1390.79116 | 0.30458293 | 0.17389239 | 1.75155992 | 0.07984951 | 0.29155449 |
| Ubqln2      | 4058.0015  | 0.30451212 | 0.25249628 | 1.20600639 | 0.22781503 | 0.51824919 |
| Bcl3        | 2654.05235 | 0.3043746  | 0.18999302 | 1.60203046 | 0.10914887 | 0.34910823 |
| Prss12      | 5.83733295 | 0.30431903 | 0.40320046 | 0.75475863 | 0.45039382 | NA         |
| Pkdcc       | 66.7278896 | 0.30426648 | 0.4251114  | 0.71573353 | 0.47415591 | 0.7401725  |
| Slc6a8      | 11431.4771 | 0.30423597 | 0.18438236 | 1.65002757 | 0.0989373  | 0.32903197 |
| Gm16596     | 2.38483098 | 0.30418462 | 0.33028283 | 0.92098223 | 0.3570597  | NA         |
| Tspyl2      | 2994.45889 | 0.30398952 | 0.16481192 | 1.84446318 | 0.06511567 | 0.2584176  |
| Prl8a9      | 1.76989034 | 0.30398631 | 0.28503513 | 1.06648718 | 0.28620347 | NA         |
| Trmu        | 359.100495 | 0.30395063 | 0.21421615 | 1.41889692 | 0.15592907 | 0.42459341 |

|             |            |            |            |            |            |            |
|-------------|------------|------------|------------|------------|------------|------------|
| Mgst2       | 4.88460921 | 0.303729   | 0.37547508 | 0.80891919 | 0.41856163 | NA         |
| Adra2c      | 13.7538642 | 0.3036485  | 0.42132964 | 0.72069106 | 0.47109962 | 0.73829186 |
| lpo4        | 5756.97728 | 0.30362637 | 0.23581645 | 1.28755382 | 0.19790132 | 0.48094783 |
| Sall2       | 775.79473  | 0.30361628 | 0.24455791 | 1.24149034 | 0.21442466 | 0.50150668 |
| Bach2os     | 1.66898681 | 0.30360767 | 0.28308928 | 1.07248028 | 0.28350437 | NA         |
| Gpr150      | 3.99473635 | 0.30357889 | 0.34935641 | 0.86896615 | 0.38486564 | NA         |
| Kbtbd4      | 1616.34425 | 0.30346938 | 0.17336075 | 1.75050802 | 0.08003069 | 0.29191981 |
| Lama5       | 16700.3172 | 0.30342816 | 0.24181605 | 1.25478917 | 0.20955531 | 0.49577373 |
| Trappc5     | 1502.77078 | 0.30339091 | 0.16767511 | 1.80939745 | 0.07038928 | 0.27007739 |
| Rnf103      | 496.037684 | 0.30336757 | 0.276838   | 1.09583069 | 0.27315287 | 0.56626801 |
| Gng13       | 72.9653589 | 0.3032243  | 0.4145843  | 0.73139359 | 0.46453878 | 0.73397175 |
| Gm10941     | 5.63322046 | 0.30315441 | 0.37904934 | 0.7997756  | 0.42384082 | NA         |
| Jph3        | 83.5620184 | 0.30314184 | 0.31734969 | 0.95522966 | 0.33946157 | 0.63296965 |
| Armc5       | 811.008385 | 0.30306594 | 0.2558687  | 1.18445881 | 0.23623149 | 0.52810283 |
| Rwdd2b      | 883.773335 | 0.30300593 | 0.18951887 | 1.59881665 | 0.10986135 | 0.35030265 |
| Agtrap      | 8019.12336 | 0.30299626 | 0.19245733 | 1.57435549 | 0.11540529 | 0.3603537  |
| Cd300lf     | 28.2165754 | 0.30293408 | 0.4241176  | 0.71426905 | 0.47506083 | 0.7406365  |
| Pnma2       | 1299.85021 | 0.30282848 | 0.31116807 | 0.9731991  | 0.33045436 | 0.62369343 |
| Peli2       | 1374.32683 | 0.30268744 | 0.289346   | 1.04610894 | 0.29551074 | 0.59015984 |
| Dcaf12      | 8293.01002 | 0.30236912 | 0.19891056 | 1.52012602 | 0.12847931 | 0.3826818  |
| Figl12      | 147.041461 | 0.30224479 | 0.41677272 | 0.7252029  | 0.46832756 | 0.73621136 |
| Tex19.1     | 5824.93884 | 0.30219208 | 0.19095039 | 1.58256859 | 0.11351983 | 0.35708809 |
| Mfap5       | 105.972344 | 0.30209225 | 0.39751816 | 0.75994578 | 0.447287   | 0.72045935 |
| Slc27a4     | 2441.7742  | 0.30180858 | 0.17818825 | 1.69376257 | 0.09031041 | 0.31312835 |
| Abcg2       | 3529.14223 | 0.30171439 | 0.2085484  | 1.44673559 | 0.14797099 | 0.41286456 |
| Hpx         | 7.72962045 | 0.30162192 | 0.42549985 | 0.70886492 | 0.4784083  | 0.74302874 |
| Zfand4      | 296.803442 | 0.30155837 | 0.24192127 | 1.24651452 | 0.21257556 | 0.49920909 |
| Tmem135     | 3260.77849 | 0.30113313 | 0.20425066 | 1.47433125 | 0.14039242 | 0.40052148 |
| Hsd3b2      | 2.24716987 | 0.30111539 | 0.3391818  | 0.88776989 | 0.37466454 | NA         |
| 6430531B16f | 30.5210635 | 0.30100059 | 0.39054948 | 0.77071051 | 0.44087854 | 0.71492202 |
| Adck5       | 1711.76285 | 0.30085875 | 0.20870808 | 1.44152901 | 0.14943529 | 0.41505058 |
| Rbbp4       | 49198.8903 | 0.30067659 | 0.18070416 | 1.66391624 | 0.09612917 | 0.32399322 |
| Gm6537      | 2.4217257  | 0.30063681 | 0.33363296 | 0.90110045 | 0.36753492 | NA         |
| Os9         | 2559.27106 | 0.30054652 | 0.18649245 | 1.61157472 | 0.10705452 | 0.34516082 |
| Larp1b      | 1274.15512 | 0.30051868 | 0.31144712 | 0.96491075 | 0.33458951 | 0.62764795 |
| Lyst        | 877.53551  | 0.3004855  | 0.29846729 | 1.0067619  | 0.31404921 | 0.60841899 |
| Xdh         | 2.60500066 | 0.30042689 | 0.2955745  | 1.01641682 | 0.30943094 | NA         |
| Tex38       | 3.79906485 | 0.30014761 | 0.38491919 | 0.77976786 | 0.43552753 | NA         |
| Ccdc150     | 25.1752376 | 0.29996694 | 0.43217098 | 0.6940932  | 0.48762376 | 0.74901592 |
| Gpr173      | 33.6922887 | 0.2998612  | 0.3929467  | 0.7631091  | 0.44539833 | 0.71865423 |
| Defb30      | 14.5341427 | 0.29967749 | 0.43079178 | 0.69564348 | 0.48665213 | 0.74804065 |

|             |            |            |            |            |            |            |
|-------------|------------|------------|------------|------------|------------|------------|
| Tmem252     | 4.43554296 | 0.29966968 | 0.37160178 | 0.80642692 | 0.41999673 | NA         |
| H1f0        | 3582.43097 | 0.29960832 | 0.28051952 | 1.068048   | 0.28549886 | 0.57847462 |
| Lyg1        | 4.74800592 | 0.2991279  | 0.368761   | 0.8111701  | 0.41726799 | NA         |
| Icam5       | 83.2969548 | 0.2990151  | 0.34894047 | 0.85692295 | 0.39148747 | 0.67959748 |
| Dgkz        | 3216.29489 | 0.29890201 | 0.16716052 | 1.78811368 | 0.07375767 | 0.2772625  |
| Pycard      | 4256.92209 | 0.29859724 | 0.22622289 | 1.31992497 | 0.18686007 | 0.46785718 |
| Rbm38       | 4193.57379 | 0.29858128 | 0.20826624 | 1.43365184 | 0.15167164 | 0.41871751 |
| Arhgap17    | 5098.88075 | 0.2985382  | 0.23104729 | 1.29210865 | 0.19631952 | 0.47933634 |
| Ripk4       | 790.829522 | 0.29851277 | 0.37084955 | 0.80494305 | 0.42085255 | 0.70091929 |
| Wdr47       | 1339.95087 | 0.29849948 | 0.22062119 | 1.35299548 | 0.17605707 | 0.45375831 |
| 6720416L17F | 9.96487718 | 0.29831414 | 0.38822276 | 0.76840971 | 0.44224381 | 0.7159317  |
| Kctd12      | 355.559804 | 0.29830063 | 0.36432325 | 0.81878013 | 0.41291187 | 0.69515344 |
| Scly        | 938.239149 | 0.29820634 | 0.23234633 | 1.28345624 | 0.19933228 | 0.48250548 |
| Cdk3-ps     | 75.0864992 | 0.29816141 | 0.36317678 | 0.82098147 | 0.41165682 | 0.69424957 |
| Arhgap24    | 2.59278983 | 0.2980896  | 0.31925611 | 0.93370052 | 0.35045839 | NA         |
| Sfxn2       | 1915.66967 | 0.2980252  | 0.24642396 | 1.20940022 | 0.22650913 | 0.5167146  |
| Phospho2    | 1599.30569 | 0.29778772 | 0.18230721 | 1.63343906 | 0.10237669 | 0.33618991 |
| Arxes1      | 531.654183 | 0.29768943 | 0.30489989 | 0.97635137 | 0.32889037 | 0.62222868 |
| Traf4       | 4851.28849 | 0.29768014 | 0.22054363 | 1.34975625 | 0.17709418 | 0.45462566 |
| Dck         | 5706.64964 | 0.29755174 | 0.19825633 | 1.50084358 | 0.13339602 | 0.39037289 |
| Dusp9       | 3872.83689 | 0.29744208 | 0.43227076 | 0.68809207 | 0.4913948  | 0.75186608 |
| 4933433G19I | 9.81941062 | 0.29740786 | 0.37970796 | 0.78325421 | 0.43347785 | 0.7084618  |
| Ppp2r5b     | 1088.61748 | 0.29724121 | 0.19689149 | 1.50967019 | 0.1311276  | 0.38737943 |
| 4931423N10I | 4.48533303 | 0.2971382  | 0.37847616 | 0.78509094 | 0.43240025 | NA         |
| Magea10     | 20.3428447 | 0.29710689 | 0.41701525 | 0.71246049 | 0.47617967 | 0.74147092 |
| Snord55     | 22.5947635 | 0.29694461 | 0.41465022 | 0.71613277 | 0.47390937 | 0.74015587 |
| Tnrc18      | 5341.59721 | 0.29682892 | 0.20240728 | 1.46649331 | 0.14251394 | 0.40361215 |
| Vtn         | 3.33637183 | 0.2966781  | 0.32543594 | 0.91163285 | 0.36196202 | NA         |
| Phlda2      | 853.811967 | 0.29660852 | 0.38551668 | 0.76937921 | 0.44166823 | 0.71556426 |
| Pcdhgb6     | 19.1486883 | 0.29658602 | 0.42838101 | 0.69234166 | 0.4887228  | 0.74966741 |
| Xpr1        | 2526.06308 | 0.29652736 | 0.26407253 | 1.12290122 | 0.26147945 | 0.55368559 |
| Atp6v1d     | 8569.05466 | 0.29652052 | 0.18507247 | 1.60218606 | 0.10911447 | 0.34910823 |
| Bre         | 3147.25894 | 0.29642335 | 0.22380032 | 1.32449924 | 0.18533729 | 0.46595793 |
| Sun3        | 7.18629833 | 0.29641695 | 0.42485624 | 0.69768764 | 0.48537256 | 0.74773497 |
| Nat6        | 1539.24834 | 0.29640814 | 0.22116568 | 1.34020858 | 0.18017754 | 0.4587945  |
| Kcnk13      | 2.39937911 | 0.29638496 | 0.33332323 | 0.88918182 | 0.37390537 | NA         |
| Fam118b     | 2151.48595 | 0.29632882 | 0.1782741  | 1.66220901 | 0.09647087 | 0.32444173 |
| Col17a1     | 192.048187 | 0.29592433 | 0.36508388 | 0.81056533 | 0.41761534 | 0.69868745 |
| BC024978    | 1052.98867 | 0.29590072 | 0.1804779  | 1.63953991 | 0.10110087 | 0.33352133 |
| Arap1       | 3530.94811 | 0.2956419  | 0.21568063 | 1.37073925 | 0.17045625 | 0.4460315  |
| D2hgdh      | 572.283346 | 0.29563397 | 0.23378799 | 1.26453872 | 0.20603673 | 0.49097098 |

|             |            |            |            |            |            |            |
|-------------|------------|------------|------------|------------|------------|------------|
| Grk4        | 24.0783367 | 0.29556743 | 0.40247566 | 0.73437344 | 0.46272117 | 0.73275933 |
| Fam208b     | 3416.47003 | 0.29554072 | 0.27521161 | 1.07386722 | 0.2828822  | 0.57527148 |
| Nccrp1      | 89.3031578 | 0.29550001 | 0.35584884 | 0.83040881 | 0.40630769 | 0.69009293 |
| Thbs3       | 251.103314 | 0.29520595 | 0.27043059 | 1.09161449 | 0.27500259 | 0.5675013  |
| Acmsd       | 21.0402937 | 0.29518495 | 0.43216396 | 0.68303926 | 0.49458203 | 0.75456149 |
| Nme9        | 1.69106806 | 0.29501    | 0.28294799 | 1.04262978 | 0.29711979 | NA         |
| AA467197    | 47.6397512 | 0.29499847 | 0.42723996 | 0.6904749  | 0.48989559 | 0.75093147 |
| Wars        | 6938.76119 | 0.29499843 | 0.19352667 | 1.52432958 | 0.1274264  | 0.38144523 |
| Bcat1       | 71389.2077 | 0.29498098 | 0.18076105 | 1.63188354 | 0.10270402 | 0.33688045 |
| 5031425E22F | 149.287268 | 0.29487938 | 0.30656499 | 0.96188213 | 0.33610881 | 0.62875354 |
| Pcyt1a      | 2628.92339 | 0.29485295 | 0.16216226 | 1.81825883 | 0.06902458 | 0.26716458 |
| Cuedc1      | 960.310279 | 0.29484924 | 0.24804163 | 1.18870866 | 0.23455433 | 0.5263048  |
| Odf3        | 10.7923011 | 0.29484038 | 0.42737821 | 0.68988164 | 0.49026862 | 0.75122351 |
| Pdlim7      | 891.193541 | 0.29466998 | 0.22977249 | 1.28244241 | 0.1996875  | 0.48279318 |
| Traf3       | 1573.42863 | 0.29447397 | 0.2104942  | 1.39896474 | 0.16182356 | 0.43291212 |
| Gm13446     | 7.31565173 | 0.29442084 | 0.3936041  | 0.74801263 | 0.45445254 | 0.72518943 |
| C4bp-ps1    | 1.78420183 | 0.29440573 | 0.2810537  | 1.04750705 | 0.29486578 | NA         |
| Neurog2     | 1.78420183 | 0.29440573 | 0.2810537  | 1.04750705 | 0.29486578 | NA         |
| Hsd12       | 1768.44128 | 0.2943345  | 0.19540468 | 1.50628172 | 0.13199487 | 0.38846559 |
| Smad7       | 4462.90723 | 0.29420243 | 0.18445765 | 1.59495921 | 0.11072136 | 0.35175236 |
| Uvssa       | 470.476846 | 0.29417355 | 0.21707434 | 1.35517421 | 0.17536206 | 0.45309298 |
| Plcb2       | 3.57508672 | 0.2941283  | 0.36939594 | 0.7962413  | 0.42589179 | NA         |
| Syt13       | 25.9672858 | 0.29411199 | 0.39838791 | 0.73825531 | 0.46035932 | 0.73086774 |
| Alpk3       | 3320.34722 | 0.29410786 | 0.28418426 | 1.0349196  | 0.30070646 | 0.59554751 |
| Tmem215     | 3.16242034 | 0.29396838 | 0.34943308 | 0.84127234 | 0.40019538 | NA         |
| Chd3        | 2073.61188 | 0.29385174 | 0.30186527 | 0.97345327 | 0.33032807 | 0.62369343 |
| Klhl35      | 1.53885882 | 0.29374661 | 0.28214846 | 1.04110656 | 0.2978261  | NA         |
| Morc2b      | 8.33394912 | 0.29368954 | 0.41412745 | 0.70917669 | 0.47821484 | 0.74289758 |
| Hs6st1      | 7936.90209 | 0.29350206 | 0.19807046 | 1.48180633 | 0.13839183 | 0.39777094 |
| Nmbr        | 2.44380695 | 0.29318018 | 0.33334558 | 0.87950823 | 0.37912578 | NA         |
| Irs3        | 28.0606137 | 0.29312128 | 0.40712563 | 0.71997747 | 0.47153887 | 0.73859646 |
| Zfp532      | 2627.39967 | 0.29301834 | 0.26852066 | 1.09123202 | 0.2751708  | 0.5675013  |
| Dxo         | 1280.17095 | 0.29286159 | 0.20526454 | 1.42675199 | 0.15365139 | 0.42148552 |
| Elmo3       | 557.006252 | 0.29279504 | 0.36956871 | 0.79226146 | 0.42820824 | 0.70473768 |
| Tmem128     | 1953.28962 | 0.29277601 | 0.19216344 | 1.52357809 | 0.12761414 | 0.38168394 |
| Epb4.1l5    | 2241.39419 | 0.29254829 | 0.21253199 | 1.37649062 | 0.16866979 | 0.44348648 |
| Mmd2        | 41.8775095 | 0.29247363 | 0.39241355 | 0.7453199  | 0.45607836 | 0.72646466 |
| Heca        | 1482.37135 | 0.29194874 | 0.27497059 | 1.06174533 | 0.28835131 | 0.5819794  |
| Zbtb4       | 373.109657 | 0.29190152 | 0.28960847 | 1.00791777 | 0.31349394 | 0.60787966 |
| Nudt22      | 782.258677 | 0.29182491 | 0.26158547 | 1.11560059 | 0.26459314 | 0.55625052 |
| Adam10      | 7480.39132 | 0.29181154 | 0.22594168 | 1.29153479 | 0.1965183  | 0.47960704 |



|             |            |            |            |            |            |            |
|-------------|------------|------------|------------|------------|------------|------------|
| Rab40c      | 2135.01568 | 0.29168331 | 0.1709443  | 1.70630611 | 0.0879511  | 0.30877503 |
| Ulk3        | 531.86116  | 0.29163921 | 0.21100142 | 1.38216704 | 0.16692042 | 0.44143393 |
| Fam101b     | 248.960886 | 0.29162563 | 0.32219649 | 0.90511736 | 0.36540322 | 0.65548338 |
| Hagl        | 710.5976   | 0.29159929 | 0.26389406 | 1.10498619 | 0.26916557 | 0.56217537 |
| Scnn1b      | 7.12939743 | 0.29157013 | 0.38908116 | 0.74938127 | 0.45362744 | 0.72463799 |
| Arhgef26    | 831.790078 | 0.29123367 | 0.4232669  | 0.68806152 | 0.49141404 | 0.75186608 |
| Trim8       | 6030.62528 | 0.2912105  | 0.22133145 | 1.31572127 | 0.18826761 | 0.46953088 |
| Nrk         | 77.5441527 | 0.29120968 | 0.40473441 | 0.71950809 | 0.47182792 | 0.73859646 |
| Cxx1b       | 95.4864886 | 0.29116928 | 0.32019532 | 0.90934895 | 0.36316596 | 0.65358105 |
| Syt9        | 3312.15883 | 0.29113237 | 0.17023677 | 1.71016146 | 0.08723602 | 0.30727233 |
| Nfkb1       | 1426.844   | 0.29103348 | 0.25673386 | 1.13359988 | 0.25696242 | 0.54996022 |
| Loxl1       | 69.4335592 | 0.29092335 | 0.41215831 | 0.70585342 | 0.4802793  | 0.74407463 |
| Ccdc23      | 1277.442   | 0.29090304 | 0.21284222 | 1.36675442 | 0.1717023  | 0.4479452  |
| Rasgrf1     | 1.85830516 | 0.29064796 | 0.30929988 | 0.93969632 | 0.34737335 | NA         |
| Nppa        | 1.23973209 | 0.29051256 | 0.2519478  | 1.15306647 | 0.2488831  | NA         |
| Srsf12      | 158.811024 | 0.29047846 | 0.35663961 | 0.81448739 | 0.4153658  | 0.69773996 |
| Cpt1b       | 5.46839432 | 0.290444   | 0.40678101 | 0.71400579 | 0.4752236  | NA         |
| Tmprss5     | 168.646588 | 0.2904311  | 0.37758063 | 0.76918962 | 0.44178075 | 0.71556426 |
| Zfp677      | 70.5037182 | 0.29042799 | 0.34283889 | 0.84712673 | 0.39692449 | 0.68311652 |
| Socs1       | 218.186683 | 0.29030476 | 0.25419679 | 1.14204731 | 0.25343436 | 0.54626394 |
| Srcin1      | 670.804941 | 0.29024402 | 0.27146893 | 1.06916112 | 0.28499707 | 0.57788637 |
| 5830473C10F | 1.55680274 | 0.29019233 | 0.28034995 | 1.0351075  | 0.30061871 | NA         |
| Krt7        | 357.071369 | 0.2901379  | 0.4178986  | 0.69427824 | 0.48750774 | 0.74891167 |
| Gng5        | 1885.04336 | 0.29013458 | 0.18759651 | 1.54658832 | 0.12196255 | 0.37203601 |
| Cp          | 5.08849609 | 0.29008308 | 0.24975052 | 1.16149139 | NA         | NA         |
| BC039771    | 17.2698157 | 0.28996889 | 0.42658313 | 0.67974769 | 0.49666423 | 0.75603225 |
| 4933433C11F | 20.2617404 | 0.28995954 | 0.421744   | 0.68752499 | 0.49175196 | 0.75201443 |
| Agl         | 2393.64361 | 0.28985684 | 0.19502321 | 1.48626842 | 0.13720814 | 0.3956469  |
| D3Ertd751e  | 453.370847 | 0.28976499 | 0.19229632 | 1.50686707 | 0.13184473 | 0.38839126 |
| Ccs         | 3165.13083 | 0.28972405 | 0.22284662 | 1.30010519 | 0.19356492 | 0.47620196 |
| Gpr128      | 6.10770853 | 0.28967822 | 0.41621116 | 0.69598861 | 0.48643597 | 0.7479826  |
| Rbm12b1     | 482.84755  | 0.28967065 | 0.18982141 | 1.52601672 | 0.1270057  | 0.38080506 |
| Zbtb10      | 3184.89098 | 0.28952582 | 0.25193918 | 1.14918936 | 0.25047791 | 0.54405045 |
| BC027072    | 1.23257635 | 0.28947974 | 0.2516038  | 1.15053803 | 0.24992234 | NA         |
| S1pr2       | 2299.59801 | 0.28937321 | 0.23618606 | 1.22519172 | 0.22050299 | 0.50895393 |
| Zfyve28     | 498.489314 | 0.28934996 | 0.38785097 | 0.74603389 | 0.45564695 | 0.7260746  |
| Megf8       | 3655.20395 | 0.28918264 | 0.17776282 | 1.62678919 | 0.10378188 | 0.33917927 |
| Pak6        | 130.936696 | 0.28915129 | 0.26770837 | 1.08009809 | 0.2800985  | 0.57238012 |
| Tnfsf12     | 101.412821 | 0.28913845 | 0.28935631 | 0.99924708 | 0.31767501 | 0.61159656 |
| Prickle4    | 99.4476162 | 0.28898949 | 0.30498585 | 0.94755048 | 0.34335835 | 0.63671108 |
| BC029214    | 83.8823121 | 0.28892946 | 0.33032884 | 0.87467223 | 0.38175227 | 0.67065405 |

|             |            |            |            |            |            |            |
|-------------|------------|------------|------------|------------|------------|------------|
| St8sia3     | 4.44931768 | 0.28887569 | 0.37119083 | 0.77824038 | 0.43642731 | NA         |
| Suox        | 480.920762 | 0.28869588 | 0.28073037 | 1.02837422 | 0.30377383 | 0.5985887  |
| Zfp800      | 1152.73921 | 0.28868023 | 0.32923329 | 0.87682575 | 0.38058129 | 0.66965599 |
| Gng12       | 2803.59692 | 0.28865909 | 0.24346026 | 1.18565177 | 0.23575985 | 0.52758273 |
| Ccdc28a     | 266.627538 | 0.28865513 | 0.26935131 | 1.07166782 | 0.28386926 | 0.57623655 |
| Gm11346     | 2.18429321 | 0.28862749 | 0.32903519 | 0.87719338 | 0.38038161 | NA         |
| C86695      | 9.61624044 | 0.28861693 | 0.40093775 | 0.71985471 | 0.47161445 | 0.73859646 |
| Trim39      | 1959.05742 | 0.28857527 | 0.19435233 | 1.48480479 | 0.13759554 | 0.39624968 |
| Tyk2        | 3572.31834 | 0.28844946 | 0.18553788 | 1.5546662  | 0.12002559 | 0.36873132 |
| Cd177       | 15.5575379 | 0.28844144 | 0.42521154 | 0.67834811 | 0.497551   | 0.75633679 |
| Nab1        | 792.697439 | 0.28840898 | 0.29795903 | 0.96794842 | 0.33307013 | 0.62623306 |
| Atg2b       | 4284.54309 | 0.28797989 | 0.21163331 | 1.36074934 | 0.17359292 | 0.45100512 |
| Ap2m1       | 7872.03023 | 0.28779116 | 0.20547661 | 1.40060303 | 0.16133281 | 0.43228454 |
| Icosl       | 629.914673 | 0.28763156 | 0.31435153 | 0.9149997  | 0.36019179 | 0.65122369 |
| Myo3a       | 1.450444   | 0.2876057  | 0.25050217 | 1.14811662 | 0.25092042 | NA         |
| Mcts1       | 2306.64668 | 0.28759919 | 0.16924287 | 1.69932828 | 0.08925735 | 0.31101075 |
| Ctnnal1     | 5132.60771 | 0.28759582 | 0.2493042  | 1.15359395 | 0.24866668 | 0.54187974 |
| Clca1       | 8.85579357 | 0.28752572 | 0.38795933 | 0.74112336 | 0.45861865 | 0.72916661 |
| Magi3       | 2145.71455 | 0.28736061 | 0.23352293 | 1.23054557 | 0.21849287 | 0.506678   |
| ErbB2ip     | 3888.05009 | 0.28730294 | 0.23656577 | 1.21447388 | 0.22456682 | 0.51379458 |
| Vsig2       | 51.7268366 | 0.28729584 | 0.39023328 | 0.73621563 | 0.46159948 | 0.73179789 |
| Pxmp2       | 1679.70312 | 0.28723571 | 0.19886833 | 1.4443512  | 0.14864021 | 0.41372557 |
| Sh3yl1      | 337.419912 | 0.28715716 | 0.23998892 | 1.19654343 | 0.23148456 | 0.52302118 |
| Atp6ap1     | 6453.87452 | 0.28713234 | 0.19500136 | 1.47246323 | 0.14089583 | 0.40129506 |
| Cul1        | 13032.3985 | 0.28705201 | 0.16913222 | 1.69720475 | 0.08965796 | 0.31156892 |
| Neo1        | 7733.7463  | 0.28702065 | 0.22432822 | 1.27946746 | 0.20073249 | 0.4844934  |
| Dock7       | 4760.75708 | 0.28695017 | 0.20699843 | 1.38624323 | 0.16567265 | 0.43935424 |
| Gaa         | 7581.62287 | 0.2869457  | 0.25224378 | 1.13757293 | 0.25529885 | 0.54828787 |
| Fam166b     | 3.09890096 | 0.28694111 | 0.34953437 | 0.82092387 | 0.41168963 | NA         |
| SrpK3       | 13.0736749 | 0.28686977 | 0.42912336 | 0.66850187 | 0.50381329 | 0.76005847 |
| BC026585    | 591.407342 | 0.28682865 | 0.28696775 | 0.99951528 | 0.31754514 | 0.61159656 |
| Ube2dn1     | 15.5194693 | 0.28679487 | 0.4113003  | 0.69728826 | 0.48562241 | 0.74775368 |
| Nespas      | 109.651437 | 0.28671596 | 0.28660068 | 1.00040224 | 0.31711589 | 0.61159656 |
| Pax1        | 6.0046587  | 0.2865414  | 0.38656397 | 0.74125222 | 0.45854053 | 0.72916661 |
| Sox15       | 1203.71953 | 0.28635627 | 0.27138822 | 1.05515366 | 0.29135505 | 0.58507276 |
| Apoo        | 234.079808 | 0.28628354 | 0.26541177 | 1.07863919 | 0.28074861 | 0.5727301  |
| Zfp112      | 80.4152221 | 0.28622351 | 0.37501091 | 0.76324049 | 0.44531999 | 0.71865423 |
| Bex4        | 3620.03126 | 0.28615407 | 0.22594028 | 1.26650311 | 0.20533302 | 0.4903111  |
| Dnajb11     | 6654.69025 | 0.28607218 | 0.16273467 | 1.75790552 | 0.07876359 | 0.28928968 |
| 1810026B05f | 957.343782 | 0.28598586 | 0.24839971 | 1.15131318 | 0.24960341 | 0.54310658 |
| Npc1        | 4650.08974 | 0.28589146 | 0.18619824 | 1.53541441 | 0.12468207 | 0.37722389 |

|             |            |            |            |            |            |            |
|-------------|------------|------------|------------|------------|------------|------------|
| 5031434O11  | 2.13765267 | 0.28588005 | 0.29395653 | 0.97252491 | 0.33078948 | NA         |
| Ngfrap1     | 11920.9417 | 0.28578486 | 0.19138987 | 1.49320789 | 0.13538278 | 0.39321069 |
| Chkb        | 48.7390613 | 0.28563725 | 0.36683678 | 0.77864944 | 0.43618624 | 0.7101063  |
| Ccdc163     | 865.336168 | 0.28563111 | 0.22353641 | 1.27778337 | 0.20132582 | 0.48541272 |
| Snord35a    | 71.5834408 | 0.28562144 | 0.36062558 | 0.79201658 | 0.42835101 | 0.7047819  |
| Clcn7       | 2793.02449 | 0.28553796 | 0.1896827  | 1.50534529 | 0.13223533 | 0.38856271 |
| A230009B12  | 22.9699346 | 0.28544566 | 0.4244069  | 0.67257546 | 0.50121742 | 0.75821324 |
| Slc6a11     | 1.51915325 | 0.28537468 | 0.27915915 | 1.02226521 | 0.30665539 | NA         |
| Tspan5      | 1902.32433 | 0.28534119 | 0.24612703 | 1.15932492 | 0.24632377 | 0.53945517 |
| Mroh2b      | 1.88655074 | 0.28524491 | 0.30943202 | 0.92183387 | 0.35661524 | NA         |
| Il10        | 10.6899363 | 0.28523273 | 0.37993904 | 0.75073288 | 0.45281343 | 0.72423137 |
| Zdhhc4      | 1142.43672 | 0.28520314 | 0.20190122 | 1.41258752 | 0.15777704 | 0.42767192 |
| Krt28       | 4.87654181 | 0.2852014  | 0.39405664 | 0.72375737 | 0.4692147  | NA         |
| Kl          | 1.59081979 | 0.28518217 | 0.27765073 | 1.02712561 | 0.30436132 | NA         |
| A530032D15  | 1.59081979 | 0.28518217 | 0.27765073 | 1.02712561 | 0.30436132 | NA         |
| Pcyt1b      | 3643.69471 | 0.28500684 | 0.30734776 | 0.9273106  | 0.35376529 | 0.64527848 |
| Zfp386      | 1173.01737 | 0.2847061  | 0.27198646 | 1.04676571 | 0.29520765 | 0.58984635 |
| Zfp628      | 634.895603 | 0.28456161 | 0.28044253 | 1.01468778 | 0.31025468 | 0.60486516 |
| Ptprn2      | 34.1711338 | 0.28447694 | 0.40171641 | 0.70815366 | 0.47884984 | 0.74309888 |
| Abhd1       | 443.540993 | 0.28440163 | 0.23542357 | 1.20804232 | 0.22703098 | 0.51714743 |
| Zfp185      | 1336.36999 | 0.28440003 | 0.28847714 | 0.98586676 | 0.3241985  | 0.618534   |
| Scrt1       | 1.22002652 | 0.28432165 | 0.24968594 | 1.1387171  | 0.25482117 | NA         |
| Tmem231     | 6500.69413 | 0.28421899 | 0.15732197 | 1.80660712 | 0.07082356 | 0.27074168 |
| Lypd1       | 5.23135468 | 0.28408271 | 0.41033374 | 0.69232111 | 0.48873569 | NA         |
| Creld2      | 4465.41296 | 0.28406967 | 0.18948277 | 1.4991847  | 0.13382572 | 0.39101    |
| Tex30       | 2872.26309 | 0.28401696 | 0.20641984 | 1.37591887 | 0.16884675 | 0.44376134 |
| Stat5a      | 587.991645 | 0.28385721 | 0.2251504  | 1.26074486 | 0.20740078 | 0.4927868  |
| Ttc16       | 20.4531055 | 0.28384064 | 0.43226753 | 0.65663187 | 0.51141765 | 0.76501865 |
| Snx20       | 675.506877 | 0.28383981 | 0.36782544 | 0.77166989 | 0.44030997 | 0.71437249 |
| Lrp3        | 356.421966 | 0.28382239 | 0.31407366 | 0.90368097 | 0.36616459 | 0.65662195 |
| Pnmal2      | 209.675492 | 0.28379745 | 0.31415144 | 0.90337785 | 0.36632539 | 0.65673734 |
| Mb21d1      | 498.427145 | 0.28378968 | 0.24593576 | 1.1539179  | 0.24853383 | 0.54187974 |
| Arl8a       | 4102.32534 | 0.28367341 | 0.17951942 | 1.58018233 | 0.11406512 | 0.35801802 |
| Nfatc1      | 36.0199582 | 0.28364476 | 0.41105957 | 0.69003322 | 0.4901733  | 0.75115145 |
| Coq10b      | 2110.24859 | 0.28358067 | 0.1751813  | 1.61878387 | 0.10549377 | 0.3419916  |
| Cyp27a1     | 216.311622 | 0.28348081 | 0.36238574 | 0.78226258 | 0.43406027 | 0.70858066 |
| Gan         | 602.029483 | 0.28347954 | 0.27803423 | 1.01958503 | 0.30792531 | 0.60278782 |
| C130060C02F | 6.75201436 | 0.2834429  | 0.41640761 | 0.68068617 | 0.49607009 | 0.7556456  |
| Tmem125     | 59.128505  | 0.28341875 | 0.33029906 | 0.85806706 | 0.39085543 | 0.67903559 |
| Rnf208      | 358.571389 | 0.28336137 | 0.29531483 | 0.95952299 | 0.33729534 | 0.63036653 |
| Gtf2h5      | 3350.41323 | 0.28326303 | 0.21340203 | 1.327368   | 0.18438698 | 0.4644599  |

|             |            |            |            |            |            |            |
|-------------|------------|------------|------------|------------|------------|------------|
| Tbc1d4      | 438.322504 | 0.28323113 | 0.41652487 | 0.67998613 | 0.49651324 | 0.75601768 |
| Meox2       | 5.28713908 | 0.28311819 | 0.39833229 | 0.71075881 | 0.47723371 | NA         |
| Cabp7       | 104.278298 | 0.28295776 | 0.37200955 | 0.76061959 | 0.44688431 | 0.72034128 |
| Ubl5        | 5895.05875 | 0.28292287 | 0.2066428  | 1.36913972 | 0.1709556  | 0.44688697 |
| Fam134a     | 1067.24849 | 0.28282218 | 0.1932025  | 1.46386395 | 0.14323112 | 0.40444379 |
| Tmem39b     | 835.531592 | 0.28272985 | 0.22337172 | 1.26573702 | 0.20560725 | 0.49054899 |
| D030056L22f | 5594.69872 | 0.28260658 | 0.19610888 | 1.44106978 | 0.14956497 | 0.41526243 |
| B4galt5     | 5368.4632  | 0.28259712 | 0.20028802 | 1.4109537  | 0.15825827 | 0.42853462 |
| Pim2        | 898.244868 | 0.28212161 | 0.24419949 | 1.15529156 | 0.24797105 | 0.54122075 |
| Uchl1       | 4966.47108 | 0.28207311 | 0.29083943 | 0.96985857 | 0.33211699 | 0.62548022 |
| Hdhd1a      | 21.7029539 | 0.28205462 | 0.43213443 | 0.6527011  | 0.513949   | 0.76592775 |
| Dnajb3      | 62.8518171 | 0.28191399 | 0.42999124 | 0.65562729 | 0.51206396 | 0.76528308 |
| Mapk15      | 102.305429 | 0.28186691 | 0.33197488 | 0.84906096 | 0.39584737 | 0.68276647 |
| Cyba        | 1694.96073 | 0.28177584 | 0.29094098 | 0.96849828 | 0.33279558 | 0.62603606 |
| Ube2l3      | 6112.30122 | 0.28173296 | 0.18066008 | 1.55946442 | 0.1188865  | 0.36678873 |
| Ttc24       | 2.21617122 | 0.28168254 | 0.32797551 | 0.85885234 | 0.39042199 | NA         |
| Sema4b      | 5225.36958 | 0.28165289 | 0.23466614 | 1.2002281  | 0.23005076 | 0.52127633 |
| H2-DMb2     | 1.578884   | 0.28165009 | 0.28029119 | 1.0048482  | 0.31496995 | NA         |
| Plce1       | 1272.72254 | 0.28158224 | 0.35987296 | 0.78244901 | 0.43395074 | 0.70858066 |
| Folr2       | 103.414013 | 0.28144641 | 0.38561094 | 0.72987144 | 0.46546877 | 0.73450075 |
| Bin2        | 1293.5866  | 0.28142701 | 0.23414363 | 1.20194176 | 0.22938609 | 0.52030092 |
| Fsip1       | 44.9534642 | 0.28138347 | 0.35806472 | 0.78584527 | 0.43195814 | 0.70739059 |
| Bglap3      | 162.082558 | 0.28133871 | 0.33522655 | 0.83924948 | 0.40132932 | 0.68647792 |
| Ubac2       | 3862.97715 | 0.28131587 | 0.16501612 | 1.70477811 | 0.08823582 | 0.30918323 |
| Enox1       | 366.34199  | 0.28126771 | 0.412729   | 0.68148279 | 0.49556606 | 0.75533199 |
| Ppfi1p1     | 5683.82143 | 0.28124784 | 0.18085107 | 1.55513509 | 0.1199139  | 0.3685338  |
| Memo1       | 4007.96502 | 0.28116626 | 0.16891988 | 1.66449478 | 0.09601359 | 0.32385312 |
| Slc35c1     | 832.739642 | 0.28115323 | 0.191839   | 1.4655687  | 0.14276582 | 0.40395767 |
| Nmnat3      | 19.5270578 | 0.28101587 | 0.42910499 | 0.65488838 | 0.51253962 | 0.76536429 |
| Zfp566      | 1388.71871 | 0.28099016 | 0.20330586 | 1.38210556 | 0.16693929 | 0.44143393 |
| Ftsj2       | 1065.44358 | 0.28088929 | 0.2052772  | 1.36834136 | 0.17120525 | 0.44738915 |
| Zfp85os     | 15.2474601 | 0.28087841 | 0.43094807 | 0.65176857 | 0.51455048 | 0.76641122 |
| Sh3bp5      | 103.125448 | 0.28078475 | 0.3568678  | 0.78680327 | 0.43139704 | 0.70688509 |
| 4930529M08  | 18.7644219 | 0.28069419 | 0.4236114  | 0.6626219  | 0.50757274 | 0.76278157 |
| Klk5        | 2.03262434 | 0.28068326 | 0.29495678 | 0.9516081  | 0.34129577 | NA         |
| Snord110    | 10.3698402 | 0.28058335 | 0.42817225 | 0.65530484 | 0.5122715  | 0.76528308 |
| Myog        | 12.5339978 | 0.28053396 | 0.43003918 | 0.65234513 | 0.51417856 | 0.76610648 |
| Ints6       | 4925.19409 | 0.28033486 | 0.21440897 | 1.30747728 | 0.19105067 | 0.47327941 |
| Samd10      | 661.612009 | 0.2802716  | 0.18752134 | 1.49461179 | 0.13501579 | 0.39257426 |
| Itpk1       | 6819.64    | 0.28024224 | 0.16551103 | 1.69319373 | 0.0904186  | 0.31328893 |
| Sh3pxd2a    | 2464.62842 | 0.28009837 | 0.26281317 | 1.06576992 | 0.28652766 | 0.57968137 |

|             |            |            |            |            |            |            |
|-------------|------------|------------|------------|------------|------------|------------|
| Zfp942      | 2404.32085 | 0.28001774 | 0.25758592 | 1.08708481 | 0.27699933 | 0.56941395 |
| Tctn1       | 949.626727 | 0.27988484 | 0.18047116 | 1.55085634 | 0.12093611 | 0.36999361 |
| Uck1        | 1371.56356 | 0.27983584 | 0.23567496 | 1.18738043 | 0.2350776  | 0.52698453 |
| Gpr137c     | 11.2595537 | 0.27971567 | 0.42372567 | 0.66013388 | 0.50916792 | 0.76389826 |
| Spr         | 2697.3933  | 0.27969688 | 0.18615742 | 1.50247505 | 0.13297447 | 0.38977816 |
| Tdrd3       | 1109.94453 | 0.27963082 | 0.21943229 | 1.27433761 | 0.20254379 | 0.487284   |
| Tmem19      | 2570.78755 | 0.27958872 | 0.17088605 | 1.636112   | 0.10181615 | 0.33509904 |
| Gdpd1       | 586.51976  | 0.27954282 | 0.30240409 | 0.92440158 | 0.35527727 | 0.64696432 |
| Adam30      | 3.51550634 | 0.27951042 | 0.36016933 | 0.77605281 | 0.43771781 | NA         |
| Tmem160     | 1724.55747 | 0.27944001 | 0.24281811 | 1.1508203  | 0.24980617 | 0.54331969 |
| Snx25       | 1814.41664 | 0.27927602 | 0.36837882 | 0.75812181 | 0.44837807 | 0.72114255 |
| Ankrd29     | 33.5800324 | 0.27926414 | 0.39856647 | 0.70067142 | 0.48350809 | 0.74623207 |
| Tcte1       | 1.24688783 | 0.27924535 | 0.24772785 | 1.12722632 | 0.25964681 | NA         |
| Serinc3     | 9634.00011 | 0.2792208  | 0.16598498 | 1.6822052  | 0.09252906 | 0.31679469 |
| Ddx19a      | 4830.28381 | 0.27918945 | 0.24909992 | 1.12079305 | 0.26237596 | 0.55478597 |
| Cnot6l      | 2042.09672 | 0.27916987 | 0.25729867 | 1.08500314 | 0.27792027 | 0.57032701 |
| Phf13       | 3563.26733 | 0.27916919 | 0.19814327 | 1.4089259  | 0.15885708 | 0.42940839 |
| Ankib1      | 2428.41044 | 0.27910987 | 0.23280705 | 1.19888923 | 0.23057102 | 0.52215086 |
| Erbp2       | 1078.97458 | 0.27889566 | 0.21552508 | 1.2940288  | 0.19565547 | 0.47862801 |
| Taf6l       | 1977.76229 | 0.27886683 | 0.20582778 | 1.35485517 | 0.17546371 | 0.45311128 |
| Chid1       | 1134.29701 | 0.27873055 | 0.25365979 | 1.09883617 | 0.27183953 | 0.56527591 |
| Ccl2        | 5.93446825 | 0.27854388 | 0.26131745 | 1.06592145 | NA         | NA         |
| Bend4       | 5858.00867 | 0.27851078 | 0.23712123 | 1.17455013 | 0.24017474 | 0.53234855 |
| Fbxw7       | 4111.3637  | 0.27851006 | 0.20290199 | 1.37263344 | 0.16986633 | 0.44511837 |
| Arpc2       | 13884.868  | 0.27842651 | 0.19644003 | 1.41736137 | 0.1563773  | 0.42521829 |
| Tmem132c    | 268.041091 | 0.27837915 | 0.39935093 | 0.697079   | 0.48575336 | 0.74775368 |
| 2310010J17R | 80.3798427 | 0.2782758  | 0.34087718 | 0.81635208 | 0.4142988  | 0.69676294 |
| 3110062M04  | 277.969944 | 0.2781702  | 0.24326666 | 1.14347853 | 0.25283996 | 0.54598821 |
| Sema3d      | 18.7665541 | 0.27792527 | 0.42805882 | 0.64926888 | 0.5161646  | 0.7671677  |
| Acpt        | 2.25018828 | 0.27788561 | 0.3247501  | 0.85569061 | 0.39216893 | NA         |
| Snora5c     | 39.1437234 | 0.27778981 | 0.36989947 | 0.75098732 | 0.45266029 | 0.72421877 |
| Klhl23      | 468.235059 | 0.27776086 | 0.2805093  | 0.99020195 | 0.32207542 | 0.61644244 |
| Ercc6       | 1726.47499 | 0.27768528 | 0.2086589  | 1.33080962 | 0.18325166 | 0.46341272 |
| Manbal      | 2150.05744 | 0.27762905 | 0.18873153 | 1.47102635 | 0.14128399 | 0.40171844 |
| Trim9       | 1.6196794  | 0.27749835 | 0.28095736 | 0.98768852 | 0.32330522 | NA         |
| Gjb4        | 528.002922 | 0.27738165 | 0.32910983 | 0.84282397 | 0.3993269  | 0.68481833 |
| 4933403O08l | 2.0353576  | 0.2772929  | 0.24603728 | 1.12703613 | 0.25972721 | NA         |
| Myo1h       | 29.0629066 | 0.27721472 | 0.39961614 | 0.69370253 | 0.48786878 | 0.74917686 |
| Cd8b1       | 3.9901707  | 0.27719304 | 0.35911725 | 0.77187336 | 0.44018944 | NA         |
| Vps45       | 1283.66125 | 0.27714923 | 0.22079859 | 1.25521283 | 0.20940151 | 0.4956659  |
| Rbmxl2      | 5223.98201 | 0.27707527 | 0.25591501 | 1.08268472 | 0.27894839 | 0.5713085  |

|             |            |            |            |            |            |            |
|-------------|------------|------------|------------|------------|------------|------------|
| Asb5        | 1.2665934  | 0.27702141 | 0.24685164 | 1.12221824 | 0.26176966 | NA         |
| Chrng       | 4.69750965 | 0.27697965 | 0.37135888 | 0.74585439 | 0.45575538 | NA         |
| Cox7c       | 8669.10954 | 0.2769074  | 0.187738   | 1.47496724 | 0.14022135 | 0.4003272  |
| Col6a5      | 34.6402964 | 0.27684461 | 0.42954613 | 0.64450496 | 0.51924804 | 0.76934346 |
| Rnd2        | 829.071779 | 0.27682908 | 0.24940024 | 1.1099792  | 0.26700799 | 0.55962323 |
| Abhd12      | 2407.8102  | 0.27681341 | 0.17889673 | 1.54733634 | 0.12178216 | 0.37177747 |
| Fcrl5       | 3.66782763 | 0.27676891 | 0.35549682 | 0.77854117 | 0.43625004 | NA         |
| Zfp93       | 296.555499 | 0.27676803 | 0.24115233 | 1.14768966 | 0.2510967  | 0.54460318 |
| Usp19       | 9800.4292  | 0.27673265 | 0.21370574 | 1.29492377 | 0.19534653 | 0.47809787 |
| Mir697      | 6.05991969 | 0.2767111  | 0.4105158  | 0.67405712 | 0.500275   | 0.75774583 |
| Hgf         | 3.9468103  | 0.27669979 | 0.34930594 | 0.79214167 | 0.42827808 | NA         |
| Diras2      | 58.1010743 | 0.27663229 | 0.38427056 | 0.71988935 | 0.47159312 | 0.73859646 |
| C2cd4a      | 3.15689806 | 0.27654835 | 0.3596638  | 0.76890794 | 0.44194796 | NA         |
| 3830417A13f | 50.4027987 | 0.27632801 | 0.38424721 | 0.71914124 | 0.4720539  | 0.73859646 |
| Skint11     | 1.2254206  | 0.27624566 | 0.24662377 | 1.12010966 | 0.26266704 | NA         |
| Mgat2       | 4563.79656 | 0.27616458 | 0.17001483 | 1.62435578 | 0.1042999  | 0.33956461 |
| Mrpl20      | 4572.09538 | 0.27612887 | 0.19692181 | 1.40222596 | 0.16084778 | 0.43208565 |
| Hlx         | 12.5630484 | 0.27608701 | 0.41995162 | 0.65742575 | 0.5109072  | 0.76483615 |
| Zhx1        | 1091.44818 | 0.27594229 | 0.22287645 | 1.23809532 | 0.21568072 | 0.5027617  |
| Tctn2       | 1086.40969 | 0.27582997 | 0.24902923 | 1.10762088 | 0.26802558 | 0.56067606 |
| Zxda        | 83.4314362 | 0.27577569 | 0.36852128 | 0.74833042 | 0.45426088 | 0.72512943 |
| Cubn        | 13.1109679 | 0.27543955 | 0.43223909 | 0.63723888 | 0.52396926 | 0.77176852 |
| Hpcal1      | 1602.62464 | 0.27535686 | 0.26858753 | 1.02520347 | 0.30526719 | 0.59977386 |
| Fthl17      | 11.0420443 | 0.27532968 | 0.40841744 | 0.67413791 | 0.50022364 | 0.75774583 |
| Dcaf12l2    | 3.86607952 | 0.27531724 | 0.358086   | 0.76885786 | 0.44197769 | NA         |
| Pop7        | 1091.36253 | 0.27530556 | 0.19903139 | 1.38322686 | 0.16659532 | 0.44114841 |
| Xk          | 514.786461 | 0.27528922 | 0.30857167 | 0.89214032 | 0.37231773 | 0.66246144 |
| Vcam1       | 4.59606099 | 0.27528023 | 0.24444903 | 1.12612526 | NA         | NA         |
| Zeb1        | 2501.59788 | 0.27521538 | 0.30944138 | 0.88939426 | 0.37379123 | 0.6634462  |
| Cmc2        | 1395.49449 | 0.27518184 | 0.20433361 | 1.34672818 | 0.17806779 | 0.4556391  |
| Dusp1       | 2788.53858 | 0.2751645  | 0.21793408 | 1.26260427 | 0.20673143 | 0.49172232 |
| LOC381967   | 4.47617899 | 0.27515833 | 0.36397871 | 0.75597368 | 0.44966497 | NA         |
| Dnah11      | 19.9429329 | 0.27510056 | 0.42573697 | 0.64617494 | 0.51816607 | 0.76808698 |
| Selp        | 3.42966906 | 0.27502881 | 0.35279818 | 0.77956415 | 0.43564746 | NA         |
| Phf8        | 3297.67423 | 0.27500631 | 0.2538733  | 1.08324235 | 0.27870087 | 0.57094943 |
| Zfp389      | 6.74788958 | 0.27482412 | 0.41656158 | 0.65974428 | 0.50941794 | 0.76407778 |
| P2ry6       | 22.0572362 | 0.27468465 | 0.409153   | 0.67134948 | 0.50199792 | 0.75895097 |
| Brms1l      | 3059.59101 | 0.27466554 | 0.15440645 | 1.77884763 | 0.07526475 | 0.28064941 |
| AF357355    | 3.3946319  | 0.27463911 | 0.36422054 | 0.75404619 | 0.45082149 | NA         |
| Flnb        | 23429.6679 | 0.27460428 | 0.26831449 | 1.02344188 | 0.30609897 | 0.60042854 |
| Sac3d1      | 1329.34795 | 0.27438002 | 0.21163052 | 1.29650494 | 0.19480158 | 0.47770871 |

|             |            |            |            |            |            |            |
|-------------|------------|------------|------------|------------|------------|------------|
| 4930543E12F | 5.25472138 | 0.27421712 | 0.39769491 | 0.68951629 | 0.49049842 | NA         |
| Ypel3       | 934.207583 | 0.27413188 | 0.2649679  | 1.03458525 | 0.30086264 | 0.59559316 |
| Nop16       | 4451.29636 | 0.2740719  | 0.18852725 | 1.45375221 | 0.14601502 | 0.40984047 |
| Mkl1        | 1256.11416 | 0.27401071 | 0.22320164 | 1.22763753 | 0.21958307 | 0.50805484 |
| Drd3        | 2.20098038 | 0.2739773  | 0.32579386 | 0.84095294 | 0.4003743  | NA         |
| Diablo      | 4580.26408 | 0.27385606 | 0.17089171 | 1.60251227 | 0.10904238 | 0.34903212 |
| Gm11627     | 258.103733 | 0.27376328 | 0.34423667 | 0.79527634 | 0.42645277 | 0.70402942 |
| Atp5e       | 5860.00547 | 0.27355613 | 0.21281588 | 1.28541221 | 0.19864828 | 0.48170581 |
| Slc16a8     | 2.39110443 | 0.27350929 | 0.31602766 | 0.86545999 | 0.38678637 | NA         |
| 4930598F16F | 3.09614789 | 0.27346975 | 0.34295133 | 0.79740105 | 0.42521815 | NA         |
| Pcdhgc5     | 30.7911157 | 0.27338715 | 0.42023115 | 0.65056375 | 0.51532814 | 0.76673057 |
| Acad8       | 2286.26541 | 0.27326659 | 0.16303368 | 1.67613586 | 0.09371158 | 0.31888596 |
| Vezt        | 901.35843  | 0.27323845 | 0.21789601 | 1.25398555 | 0.20984726 | 0.49632467 |
| Fam19a1     | 2.43538788 | 0.27317156 | 0.26376783 | 1.03565155 | 0.30036473 | NA         |
| Gm6484      | 2.19788831 | 0.27314065 | 0.29372939 | 0.92990577 | 0.35241987 | NA         |
| Fam120aos   | 441.089712 | 0.27313467 | 0.27187625 | 1.00462863 | 0.31507571 | 0.6093449  |
| Dnajb1      | 5688.91209 | 0.27291144 | 0.2041509  | 1.3368123  | 0.18128391 | 0.46004343 |
| Ppp3cc      | 195.637281 | 0.27288026 | 0.38510053 | 0.70859486 | 0.47857593 | 0.74302874 |
| Mtch2       | 18610.3274 | 0.27279781 | 0.19193796 | 1.42128115 | 0.15523504 | 0.4237087  |
| Ggact       | 713.886633 | 0.27273672 | 0.18760259 | 1.45380037 | 0.14600166 | 0.40984047 |
| Pdrg1       | 1981.82279 | 0.27266708 | 0.17236197 | 1.58194458 | 0.11366222 | 0.35737186 |
| Sh2d2a      | 1.73357127 | 0.27261852 | 0.30729512 | 0.88715538 | 0.37499525 | NA         |
| Cpa2        | 40.887885  | 0.27256667 | 0.38650959 | 0.70520029 | 0.4806856  | 0.74425276 |
| Acta1       | 6.80238853 | 0.27247684 | 0.41482872 | 0.6568418  | 0.51128264 | 0.76501865 |
| Myeov2      | 2111.23599 | 0.27247427 | 0.23546064 | 1.15719667 | 0.24719202 | 0.54012689 |
| Srp14       | 6455.59286 | 0.27240887 | 0.22430268 | 1.21446998 | 0.22456831 | 0.51379458 |
| Mfsd8       | 400.755868 | 0.2723831  | 0.23433961 | 1.16234341 | 0.245096   | 0.537854   |
| Nlrc4       | 110.164199 | 0.27216999 | 0.42268058 | 0.64391412 | 0.51963112 | 0.76959844 |
| Mcfd2       | 3125.4253  | 0.27216385 | 0.1803873  | 1.50877499 | 0.13135629 | 0.38745979 |
| Slc5a6      | 2233.69162 | 0.27190479 | 0.22805688 | 1.19226744 | 0.2331564  | 0.5247835  |
| Lrrn4cl     | 224.48018  | 0.27187205 | 0.31266924 | 0.86951965 | 0.38456297 | 0.67384098 |
| H2-Q2       | 51.7052591 | 0.27185067 | 0.43159046 | 0.62988108 | 0.52877239 | 0.7758222  |
| Zfp458      | 84.1185084 | 0.27178426 | 0.30865351 | 0.88054807 | 0.37856247 | 0.66771292 |
| 4931431C16F | 2.61768527 | 0.27177549 | 0.33640084 | 0.80789183 | 0.41915286 | NA         |
| Rcl1        | 6194.17145 | 0.27164823 | 0.18046388 | 1.50527752 | 0.13225274 | 0.38856271 |
| DQ267100    | 9.37043514 | 0.27159663 | 0.43071466 | 0.63057207 | 0.52832037 | 0.77552483 |
| 5033406O09I | 199.44518  | 0.27151848 | 0.27091358 | 1.00223282 | 0.31623116 | 0.61081987 |
| Psenen      | 681.240952 | 0.27125246 | 0.21271433 | 1.27519596 | 0.20223989 | 0.48692251 |
| Adrbk2      | 871.268208 | 0.27123865 | 0.30553144 | 0.8877602  | 0.37466975 | 0.6642902  |
| BC100451    | 5.73430902 | 0.27113449 | 0.40133199 | 0.67558655 | 0.49930318 | NA         |
| Ssbp2       | 432.603435 | 0.27113243 | 0.40968325 | 0.66180989 | 0.50809307 | 0.76319475 |

|             |            |            |            |            |            |            |
|-------------|------------|------------|------------|------------|------------|------------|
| Mrpl41      | 1737.54013 | 0.27074446 | 0.21800104 | 1.24194116 | 0.21425827 | 0.50141917 |
| 4933427D06l | 624.796823 | 0.2707249  | 0.27167871 | 0.9964892  | 0.31901251 | 0.61284294 |
| Mast2       | 4348.41745 | 0.27070536 | 0.20406168 | 1.32658594 | 0.18464569 | 0.46455672 |
| Ticrr       | 12063.9194 | 0.27066733 | 0.24940729 | 1.08524228 | 0.27781436 | 0.5702108  |
| Wscd2       | 363.032213 | 0.27064299 | 0.31821606 | 0.85050073 | 0.39504676 | 0.68236944 |
| Spef2       | 42.5841665 | 0.27064117 | 0.3689927  | 0.7334594  | 0.46327828 | 0.73297798 |
| Tmem181a    | 3391.1062  | 0.27047298 | 0.42855811 | 0.63112322 | 0.52795996 | 0.77536173 |
| Acadl       | 1935.9632  | 0.27038453 | 0.28623486 | 0.94462476 | 0.34485048 | 0.63773152 |
| Col4a6      | 4.40271241 | 0.27035192 | 0.39252965 | 0.68874266 | 0.49098523 | NA         |
| Trem14      | 8.55987753 | 0.27031009 | 0.42481306 | 0.63630362 | 0.52457855 | 0.77236517 |
| Toporsos    | 93.2500769 | 0.27026223 | 0.29484619 | 0.91662108 | 0.35934123 | 0.65018613 |
| BC037704    | 65.3865067 | 0.27023662 | 0.36145716 | 0.74763112 | 0.45468269 | 0.72520723 |
| Map4        | 26612.6366 | 0.27017077 | 0.17767134 | 1.52062101 | 0.12835497 | 0.3824439  |
| Olf20       | 2.08394259 | 0.27015646 | 0.2961077  | 0.91235876 | 0.36157989 | NA         |
| Ybx1        | 71523.4923 | 0.26994945 | 0.19484167 | 1.38548111 | 0.1659054  | 0.43967194 |
| Pi4k2b      | 1762.38657 | 0.26994257 | 0.24768111 | 1.08987949 | 0.27576623 | 0.56820011 |
| Kcnq1ot1    | 218.727533 | 0.26994167 | 0.39065818 | 0.69099199 | 0.48957058 | 0.75067166 |
| Mrps7       | 4429.10558 | 0.26991073 | 0.20156733 | 1.33905993 | 0.18055117 | 0.45930822 |
| Brinp1      | 14.455277  | 0.26979845 | 0.43164236 | 0.62505091 | 0.53193764 | 0.77840121 |
| Leng1       | 701.517855 | 0.26979128 | 0.22070698 | 1.22239577 | 0.221558   | 0.50979956 |
| Pkdrej      | 4.74186432 | 0.26972881 | 0.40201574 | 0.67094092 | 0.50225816 | NA         |
| Ppp1r3c     | 185.985477 | 0.26971944 | 0.41301013 | 0.65305767 | 0.5137191  | 0.76592775 |
| Madcam1     | 98.05782   | 0.26970268 | 0.39891055 | 0.67609814 | 0.49897834 | 0.75696826 |
| Fez2        | 1262.54234 | 0.26959251 | 0.18416566 | 1.46385873 | 0.14323255 | 0.40444379 |
| Rgs10       | 141.541694 | 0.26918281 | 0.3807117  | 0.70705159 | 0.47953442 | 0.74371594 |
| Snora78     | 46.9180394 | 0.26904403 | 0.39305024 | 0.6845029  | 0.49365766 | 0.75389732 |
| Esp6        | 1.54839025 | 0.26901414 | 0.27563271 | 0.97598772 | 0.32907055 | NA         |
| 2810002D19l | 422.506837 | 0.26898127 | 0.35675515 | 0.75396604 | 0.45086961 | 0.7229937  |
| Pard6b      | 1292.00558 | 0.2688152  | 0.26596204 | 1.01072767 | 0.31214679 | 0.60664161 |
| Rsg1        | 74.7349224 | 0.2687759  | 0.32564979 | 0.82535259 | 0.40917144 | 0.69268726 |
| Pitpnc1     | 3479.87132 | 0.26867745 | 0.32750688 | 0.82037193 | 0.41200411 | 0.69453398 |
| Oma1        | 1250.99221 | 0.26853351 | 0.17773017 | 1.5109056  | 0.1308125  | 0.38666893 |
| Phf21a      | 1892.60716 | 0.26846174 | 0.18479487 | 1.45275538 | 0.14629169 | 0.4103691  |
| Ttc9        | 391.662286 | 0.26843968 | 0.37229311 | 0.7210439  | 0.47088251 | 0.73829186 |
| Agrn        | 19689.1318 | 0.26834024 | 0.23499866 | 1.14187988 | 0.25350395 | 0.54626394 |
| Fkbp1b      | 374.120491 | 0.26794001 | 0.31762844 | 0.84356427 | 0.39891294 | 0.68471248 |
| Cry1        | 2871.36621 | 0.26791408 | 0.20812921 | 1.28724885 | 0.19800756 | 0.48105228 |
| Cers3       | 24.3995698 | 0.26787219 | 0.40984848 | 0.65358835 | 0.51337705 | 0.76592775 |
| Zfp369      | 746.900337 | 0.26783072 | 0.30848728 | 0.8682067  | 0.38528119 | 0.67441555 |
| 4930528A17f | 45.0036432 | 0.26781374 | 0.3780662  | 0.7083779  | 0.47871061 | 0.74303112 |
| Col9a1      | 3.14712714 | 0.26779677 | 0.3187054  | 0.8402643  | 0.40076021 | NA         |



|             |            |            |            |            |            |            |
|-------------|------------|------------|------------|------------|------------|------------|
| Cwh43       | 79.8561889 | 0.26774852 | 0.34795434 | 0.76949327 | 0.44160054 | 0.71556426 |
| Camk2d      | 276.765176 | 0.26748121 | 0.3159279  | 0.84665267 | 0.39718875 | 0.6834125  |
| Mir17       | 2.4269568  | 0.26736552 | 0.35114246 | 0.76141609 | 0.44640858 | NA         |
| Tmc2        | 1.60712957 | 0.26720385 | 0.27686602 | 0.96510164 | 0.33449391 | NA         |
| B230118H07I | 972.62269  | 0.26713797 | 0.21494555 | 1.24281697 | 0.21393529 | 0.50085527 |
| Tmem191c    | 1311.06995 | 0.26700226 | 0.3598301  | 0.74202315 | 0.45807331 | 0.72881196 |
| E330020D12I | 499.461854 | 0.26699949 | 0.37835822 | 0.70567912 | 0.48038771 | 0.74407463 |
| Peg12       | 609.242833 | 0.26695012 | 0.43175114 | 0.61829628 | 0.53638005 | 0.78079624 |
| Dus3l       | 3242.11203 | 0.26693901 | 0.20222058 | 1.32003881 | 0.18682206 | 0.46783734 |
| Tac1        | 1.40696919 | 0.26691909 | 0.27447703 | 0.97246422 | 0.33081965 | NA         |
| Synj2bp     | 3475.51335 | 0.26688757 | 0.15682715 | 1.70179448 | 0.0887939  | 0.31002115 |
| Rrbp1       | 17554.7271 | 0.26639029 | 0.31331294 | 0.85023712 | 0.39519327 | 0.68239513 |
| Numbl       | 1698.17141 | 0.26626523 | 0.2298439  | 1.15846116 | 0.24667589 | 0.53953931 |
| Msrb2       | 1250.73182 | 0.26601507 | 0.28458161 | 0.93475847 | 0.34991278 | 0.64198366 |
| Rnf122      | 335.067743 | 0.26595143 | 0.25233181 | 1.05397504 | 0.29189435 | 0.58563546 |
| 5330413P13F | 59.2664406 | 0.26559489 | 0.42560573 | 0.62403973 | 0.53260149 | 0.7787064  |
| Ndufab1     | 723.307152 | 0.26537021 | 0.1866837  | 1.42149642 | 0.15517249 | 0.4237087  |
| Vps18       | 1635.67759 | 0.26535444 | 0.217783   | 1.21843506 | 0.22305869 | 0.51207347 |
| Tlr12       | 1.96271946 | 0.26533863 | 0.29008963 | 0.9146781  | 0.36036065 | NA         |
| Cyb5d2      | 249.569934 | 0.26528009 | 0.24692003 | 1.07435632 | 0.28266301 | 0.57497613 |
| 5830416I19R | 3.73382505 | 0.26515438 | 0.37136628 | 0.71399691 | 0.47522909 | NA         |
| E230016K23F | 6.63441349 | 0.26508744 | 0.38005788 | 0.69749228 | 0.48549477 | 0.74775368 |
| Cbx6        | 4406.79976 | 0.26507605 | 0.19847838 | 1.33554122 | 0.18169927 | 0.46079683 |
| Nudt16      | 134.627129 | 0.26496451 | 0.33274202 | 0.79630612 | 0.42585413 | 0.70402942 |
| Clasp1      | 5577.06433 | 0.26468261 | 0.20581417 | 1.28602716 | 0.19843358 | 0.4814104  |
| Haus4       | 5825.78608 | 0.2646618  | 0.33635536 | 0.78685176 | 0.43136865 | 0.70688509 |
| Nedd8       | 6817.53857 | 0.26463766 | 0.18858076 | 1.40331208 | 0.1605238  | 0.4319432  |
| Fut8        | 2475.74489 | 0.26457914 | 0.20941487 | 1.263421   | 0.20643792 | 0.49117443 |
| Islr2       | 285.250611 | 0.26448598 | 0.31061844 | 0.85148191 | 0.39450171 | 0.68203403 |
| Mob2        | 1041.33033 | 0.26438694 | 0.18296828 | 1.4449878  | 0.14846131 | 0.41357758 |
| Snhg11      | 3379.52351 | 0.26436872 | 0.24843874 | 1.06412034 | 0.28727419 | 0.58077783 |
| Fmo4        | 2.55674579 | 0.26423791 | 0.30926105 | 0.85441703 | 0.39287396 | NA         |
| 8430423G03I | 1.38726362 | 0.26419214 | 0.27376386 | 0.96503659 | 0.33452649 | NA         |
| Tmem30c     | 1.38726362 | 0.26419214 | 0.27376386 | 0.96503659 | 0.33452649 | NA         |
| Efna3       | 717.772154 | 0.26408901 | 0.22195542 | 1.1898291  | 0.23411357 | 0.5258088  |
| Acbd5       | 2925.40742 | 0.26376829 | 0.18381122 | 1.4349956  | 0.15128835 | 0.41838967 |
| Txndc11     | 1513.27162 | 0.26376199 | 0.17231147 | 1.530728   | 0.12583663 | 0.37885621 |
| Ntrk1       | 110.092389 | 0.26366155 | 0.41950506 | 0.62850624 | 0.52967236 | 0.77670296 |
| Morn3       | 18.5836931 | 0.26363822 | 0.43148492 | 0.61100217 | 0.54119815 | 0.7847247  |
| Nedd9       | 55.7748275 | 0.26356741 | 0.38745361 | 0.6802554  | 0.49634276 | 0.75583884 |
| 1700123O20I | 2129.73698 | 0.2631754  | 0.18631859 | 1.41250213 | 0.15780217 | 0.42767192 |

|             |            |            |            |            |            |            |
|-------------|------------|------------|------------|------------|------------|------------|
| Atg4a       | 423.4907   | 0.26300452 | 0.20775732 | 1.26592183 | 0.20554107 | 0.4904873  |
| Nfe2l2      | 11130.5605 | 0.26299365 | 0.19082512 | 1.37819194 | 0.16814403 | 0.44308872 |
| Gm20337     | 66.768742  | 0.26290609 | 0.33639075 | 0.7815497  | 0.43447926 | 0.70860901 |
| Rbm3os      | 41.5297735 | 0.26286851 | 0.38198585 | 0.68816295 | 0.49135017 | 0.75186608 |
| Hoxc6       | 47.3884369 | 0.26283399 | 0.35039373 | 0.75011042 | 0.45318821 | 0.72431158 |
| Ngp         | 1.39981345 | 0.26264775 | 0.27277135 | 0.96288611 | 0.33560468 | NA         |
| Zim3        | 122.19031  | 0.26264033 | 0.38579327 | 0.68077995 | 0.49601074 | 0.75562921 |
| Pigm        | 2700.74221 | 0.26259771 | 0.21991749 | 1.19407377 | 0.23244911 | 0.5242663  |
| Adcy9       | 494.784587 | 0.26258503 | 0.33984375 | 0.77266398 | 0.43972127 | 0.71378972 |
| Arpc5l      | 3637.48066 | 0.26255114 | 0.16046475 | 1.63619201 | 0.10179941 | 0.33509904 |
| Arfgap1     | 3131.39781 | 0.26253955 | 0.17292696 | 1.51821063 | 0.12896131 | 0.38379957 |
| Limk1       | 2387.45879 | 0.26244943 | 0.20429851 | 1.28463703 | 0.19891915 | 0.48213712 |
| Ptpn9       | 937.323414 | 0.26236243 | 0.26537121 | 0.98866197 | 0.32282856 | 0.61735205 |
| Tmem110     | 1268.76764 | 0.26222703 | 0.17122698 | 1.53145859 | 0.12565609 | 0.37885621 |
| Dffa        | 1131.14891 | 0.26218809 | 0.21168263 | 1.23859045 | 0.21549721 | 0.50275397 |
| Akr1c14     | 16.5166023 | 0.26210568 | 0.42999479 | 0.60955547 | 0.54215632 | 0.78508319 |
| Acp6        | 10525.0098 | 0.26204022 | 0.26395696 | 0.99273845 | 0.32083743 | 0.61482969 |
| Sesn1       | 3212.61759 | 0.26203345 | 0.26628006 | 0.9840521  | 0.3250899  | 0.6188465  |
| Ntng2       | 19.2691558 | 0.26197506 | 0.42887487 | 0.61084264 | 0.54130376 | 0.78480466 |
| Safb2       | 4526.1869  | 0.26191278 | 0.21522334 | 1.21693485 | 0.22362901 | 0.51290671 |
| Col15a1     | 7.68682898 | 0.2618041  | 0.42161062 | 0.62096182 | 0.53462474 | 0.77984269 |
| Gyg         | 949.658537 | 0.26177114 | 0.25554424 | 1.02436721 | 0.30566186 | 0.60009099 |
| Tmem74b     | 18.5284031 | 0.26173304 | 0.43219029 | 0.60559675 | 0.54478256 | 0.78639569 |
| Degs2       | 12.4607901 | 0.26154583 | 0.43193044 | 0.60552767 | 0.54482845 | 0.78639569 |
| Lct         | 26.1511752 | 0.26138638 | 0.4309507  | 0.60653429 | 0.54416002 | 0.78623679 |
| Tfeb        | 3182.54605 | 0.26129319 | 0.27695847 | 0.94343816 | 0.34545683 | 0.63779826 |
| Lbx2        | 7.37675786 | 0.26128962 | 0.41996572 | 0.62216893 | 0.5338308  | 0.77957624 |
| Tmem25      | 110.810043 | 0.26115694 | 0.30669836 | 0.85151072 | 0.39448571 | 0.68203403 |
| Ccdc91      | 1049.18879 | 0.26108756 | 0.18550349 | 1.40745363 | 0.15929292 | 0.43014212 |
| Tmed3       | 531.295003 | 0.26106906 | 0.27983619 | 0.93293532 | 0.35085337 | 0.64280404 |
| Hspa1l      | 4.24942873 | 0.2610563  | 0.36069592 | 0.72375728 | 0.46921476 | NA         |
| Fgg         | 93.2128882 | 0.26096055 | 0.42629698 | 0.61215669 | 0.5404341  | 0.78434817 |
| Nhlrc1      | 346.855204 | 0.26093864 | 0.25607684 | 1.01898571 | 0.30820975 | 0.60283181 |
| Alkbh6      | 1042.80911 | 0.26083708 | 0.19038739 | 1.37003335 | 0.17067649 | 0.44638246 |
| Mfsd4       | 118.646617 | 0.26071074 | 0.39446446 | 0.66092328 | 0.50866151 | 0.76360606 |
| Hsd3b7      | 1352.69824 | 0.26059842 | 0.24865937 | 1.04801369 | 0.2946323  | 0.58907519 |
| Ccr8        | 5.97466165 | 0.26050331 | 0.40970222 | 0.63583573 | 0.52488349 | 0.77262188 |
| Timm21      | 328.530029 | 0.26046778 | 0.23469415 | 1.10981797 | 0.26707747 | 0.55963851 |
| 3110009E18F | 280.697342 | 0.2603467  | 0.27528216 | 0.9457449  | 0.34427872 | 0.63748824 |
| Syng2       | 5500.2863  | 0.260151   | 0.21208975 | 1.22660803 | 0.21996995 | 0.5086096  |
| Psd4        | 273.739114 | 0.26014819 | 0.33157621 | 0.78458038 | 0.43269964 | 0.70789874 |

|             |            |            |            |            |            |            |
|-------------|------------|------------|------------|------------|------------|------------|
| Med29       | 775.276407 | 0.25974863 | 0.21066939 | 1.23296807 | 0.21758768 | 0.50540791 |
| Nodal       | 5993.56173 | 0.25970309 | 0.21795838 | 1.19152604 | 0.23344714 | 0.52506228 |
| Myocd       | 1.09529262 | 0.25969964 | 0.24043574 | 1.08012081 | 0.28008839 | NA         |
| Mir30d      | 1.09529262 | 0.25969964 | 0.24043574 | 1.08012081 | 0.28008839 | NA         |
| 5730416F02F | 1.88279079 | 0.25958876 | 0.29053787 | 0.89347652 | 0.37160204 | NA         |
| Trim15      | 8.48485067 | 0.25958492 | 0.41183485 | 0.63031315 | 0.52848972 | 0.77562901 |
| Rpp38       | 1240.56477 | 0.25957959 | 0.18192536 | 1.4268467  | 0.15362409 | 0.42148552 |
| Cd48        | 2.99487951 | 0.25935899 | 0.34897472 | 0.7432028  | 0.45735891 | NA         |
| Kcnma1      | 49.123189  | 0.25932382 | 0.43197018 | 0.60032805 | 0.54828763 | 0.78882606 |
| Hdac1       | 17099.1037 | 0.2592815  | 0.21895715 | 1.1841655  | 0.23634756 | 0.52810283 |
| Mfn2        | 1565.51166 | 0.25916599 | 0.22551551 | 1.1492158  | 0.25046701 | 0.54405045 |
| BC016579    | 1.76181685 | 0.25899044 | 0.3035634  | 0.85316752 | 0.39356641 | NA         |
| Arhgap1     | 6018.83788 | 0.25894666 | 0.19039184 | 1.36007224 | 0.17380706 | 0.45100512 |
| Plin1       | 1.08813688 | 0.25862032 | 0.24001623 | 1.0775118  | 0.28125168 | NA         |
| Aadat       | 1.08813688 | 0.25862032 | 0.24001623 | 1.0775118  | 0.28125168 | NA         |
| Rptn        | 1.91062371 | 0.25857087 | 0.2389424  | 1.08214731 | 0.27918708 | NA         |
| Zfp248      | 375.355166 | 0.25852213 | 0.26871627 | 0.96206355 | 0.33601768 | 0.62870495 |
| Glipr1      | 15.1537356 | 0.25846297 | 0.42870658 | 0.60289015 | 0.54658177 | 0.78775654 |
| Kazald1     | 49.0209129 | 0.25841427 | 0.39941416 | 0.64698325 | 0.51764278 | 0.76807205 |
| Cdon        | 1390.21146 | 0.25832276 | 0.30477819 | 0.84757626 | 0.396674   | 0.68311652 |
| Gabra4      | 2.88566535 | 0.25805367 | 0.3034814  | 0.85031131 | 0.39515203 | NA         |
| Sptb        | 437.27404  | 0.25803674 | 0.34609838 | 0.74555893 | 0.4559339  | 0.72630896 |
| Cycs        | 2769.49288 | 0.25800917 | 0.19733985 | 1.30743574 | 0.19106477 | 0.47327941 |
| Gapdhs      | 2.33351273 | 0.25796048 | 0.30397487 | 0.84862436 | 0.39609035 | NA         |
| Micu3       | 950.917578 | 0.25783872 | 0.20894    | 1.23403237 | 0.21719084 | 0.50478775 |
| B230208H11  | 33.0922367 | 0.25762648 | 0.38592773 | 0.66755111 | 0.50442017 | 0.7604459  |
| Fbxo46      | 612.182449 | 0.25742168 | 0.22676977 | 1.13516753 | 0.25630513 | 0.54923505 |
| Egflam      | 9.00231157 | 0.25735485 | 0.42368026 | 0.60742705 | 0.54356754 | 0.78603486 |
| Tgfbr3      | 615.467312 | 0.25723751 | 0.35978229 | 0.71498103 | 0.47462076 | 0.74052205 |
| Msl3        | 872.210759 | 0.25713422 | 0.23660187 | 1.08678018 | 0.27713397 | 0.56954016 |
| Soga1       | 1269.25888 | 0.25711477 | 0.28558116 | 0.90032119 | 0.36794935 | 0.6582285  |
| Gm10640     | 2.97844154 | 0.25708395 | 0.36171697 | 0.71073235 | 0.47725011 | NA         |
| Aatk        | 35.6047924 | 0.25695561 | 0.41849649 | 0.61399706 | 0.53921727 | 0.78302849 |
| Rusc1       | 1031.65666 | 0.25690572 | 0.22164897 | 1.15906567 | 0.24642942 | 0.53951265 |
| Rad21l      | 2.47087012 | 0.25667624 | 0.3335323  | 0.76956937 | 0.44155538 | NA         |
| Gadd45g     | 77.6289292 | 0.2564363  | 0.36472789 | 0.70308938 | 0.48200005 | 0.74506279 |
| 2610028E06F | 12.2118842 | 0.25637027 | 0.43137565 | 0.59430862 | 0.55230571 | 0.79179683 |
| Oasl2       | 68.3330107 | 0.25624102 | 0.42148129 | 0.60795349 | 0.54321832 | 0.78596222 |
| Cdca7l      | 1961.75567 | 0.256147   | 0.26412388 | 0.96979868 | 0.33214685 | 0.62548022 |
| Aph1a       | 1125.81927 | 0.25599286 | 0.18515788 | 1.38256534 | 0.16679818 | 0.44136099 |
| Plekhb1     | 399.77348  | 0.25593694 | 0.33773965 | 0.75779359 | 0.44857456 | 0.72138397 |

|             |            |            |            |            |            |            |
|-------------|------------|------------|------------|------------|------------|------------|
| Tesc        | 753.784268 | 0.25586272 | 0.42857201 | 0.59701221 | 0.55049923 | 0.79097822 |
| Gramd1a     | 3395.12772 | 0.25582421 | 0.18999629 | 1.34646952 | 0.17815114 | 0.45566257 |
| Cpt1a       | 13282.3683 | 0.25576278 | 0.24066798 | 1.06272045 | 0.28790874 | 0.58147146 |
| Gpr61       | 2.52784779 | 0.25575498 | 0.33366115 | 0.76651113 | 0.44337223 | NA         |
| Csk         | 2638.64624 | 0.25565297 | 0.2021172  | 1.26487486 | 0.20591619 | 0.49075903 |
| Map4k2      | 1381.35424 | 0.25543846 | 0.18847524 | 1.35528921 | 0.17532543 | 0.45309298 |
| Tmem38b     | 1449.50268 | 0.25523514 | 0.17834308 | 1.43114686 | 0.15238813 | 0.4200262  |
| 4930512B01f | 1.73319388 | 0.25522297 | 0.30298799 | 0.84237565 | 0.39957772 | NA         |
| Pax7        | 7.01651002 | 0.25522652 | 0.41048755 | 0.62176435 | 0.53409683 | 0.77966205 |
| Pitpna      | 5935.94864 | 0.25518207 | 0.15340643 | 1.66343795 | 0.0962248  | 0.32400358 |
| C230052112R | 1082.111   | 0.25509596 | 0.23047719 | 1.10681653 | 0.26837326 | 0.56110753 |
| Nek11       | 13.9946732 | 0.25508848 | 0.43180008 | 0.59075599 | 0.55468393 | 0.79393007 |
| Tubb2a      | 1967.37337 | 0.25491405 | 0.22078123 | 1.15460019 | 0.24825419 | 0.54162653 |
| Ifitm10     | 3.54309374 | 0.25479742 | 0.35154065 | 0.72480213 | 0.46857343 | NA         |
| Eps8l1      | 27.611015  | 0.25478003 | 0.42713941 | 0.59647981 | 0.55085474 | 0.79097822 |
| Dtnbp1      | 1064.39771 | 0.25475554 | 0.17572344 | 1.44975276 | 0.14712748 | 0.41165516 |
| Cntn1       | 4.94203725 | 0.25471543 | 0.39734443 | 0.64104442 | 0.52149382 | NA         |
| Tubd1       | 563.041557 | 0.25459159 | 0.19353299 | 1.31549455 | 0.18834375 | 0.46953088 |
| Ppm1n       | 252.191902 | 0.25454185 | 0.25926178 | 0.98179473 | 0.32620099 | 0.61957682 |
| Zfhx2os     | 5.06720965 | 0.25449346 | 0.40807273 | 0.62364732 | 0.53285923 | NA         |
| Msn         | 19362.0589 | 0.25442292 | 0.21083108 | 1.20676193 | 0.22752384 | 0.51773826 |
| Dmrta1      | 9.84238649 | 0.25439077 | 0.40281039 | 0.63153975 | 0.52768767 | 0.77506906 |
| Gjd4        | 4.71778477 | 0.25427754 | 0.38759339 | 0.656042   | 0.5117971  | NA         |
| Fsd1l       | 2266.4128  | 0.25418489 | 0.32300346 | 0.7869417  | 0.431316   | 0.70688509 |
| Pld4        | 75.4568941 | 0.25400244 | 0.4090158  | 0.62100887 | 0.53459379 | 0.77984269 |
| Irgm2       | 221.800185 | 0.25393325 | 0.33807268 | 0.7511203  | 0.45258026 | 0.72421877 |
| 4930599N23l | 2.05416523 | 0.25387994 | 0.32029127 | 0.79265332 | 0.42797983 | NA         |
| Wdfy3       | 4285.60508 | 0.25354775 | 0.30332168 | 0.83590383 | 0.40320901 | 0.68760865 |
| BC017158    | 584.911046 | 0.25351912 | 0.20828959 | 1.21714735 | 0.22354816 | 0.51281862 |
| Plg         | 2.5669936  | 0.25338932 | 0.33526807 | 0.75578126 | 0.44978036 | NA         |
| Zcchc17     | 2196.27367 | 0.25335506 | 0.16858718 | 1.5028133  | 0.13288719 | 0.38977816 |
| Als2cl      | 1224.63423 | 0.25333993 | 0.24955209 | 1.01517854 | 0.31002073 | 0.6047582  |
| Pxk         | 1460.99276 | 0.25332945 | 0.23138032 | 1.09486169 | 0.27357724 | 0.56657339 |
| Slc25a3     | 32068.6268 | 0.25317003 | 0.18444665 | 1.37259219 | 0.16987916 | 0.44511837 |
| Lamtor1     | 4954.70056 | 0.25311481 | 0.19652972 | 1.28792127 | 0.19777337 | 0.48093412 |
| Epb4.2      | 3.27492726 | 0.25299542 | 0.3746479  | 0.67528851 | 0.49949248 | NA         |
| Rtdr1       | 1.42128067 | 0.25295488 | 0.26792095 | 0.94413998 | 0.34509812 | NA         |
| Slc12a4     | 2415.14224 | 0.25289827 | 0.17763006 | 1.42373579 | 0.15452297 | 0.42295308 |
| Mansc1      | 253.045454 | 0.25277456 | 0.32205396 | 0.78488264 | 0.43252238 | 0.70786735 |
| AV051173    | 3.92689081 | 0.25270151 | 0.38565082 | 0.65525987 | 0.51230045 | NA         |
| Snora75     | 38.3132368 | 0.25266989 | 0.40342086 | 0.62631837 | 0.53110614 | 0.77814505 |

|             |            |            |            |            |            |            |
|-------------|------------|------------|------------|------------|------------|------------|
| Adra1a      | 3.89333978 | 0.25263592 | 0.35042215 | 0.72094736 | 0.4709419  | NA         |
| Ogfr        | 2381.84406 | 0.25260469 | 0.2019402  | 1.25088862 | 0.21097512 | 0.49778092 |
| Pitx1       | 99.8199365 | 0.25239288 | 0.40440814 | 0.62410436 | 0.53255905 | 0.7787064  |
| Nfs1        | 3964.74641 | 0.25238776 | 0.16766405 | 1.50531828 | 0.13224227 | 0.38856271 |
| Kdm4a       | 7948.60992 | 0.25236028 | 0.20334806 | 1.24102626 | 0.21459605 | 0.50166747 |
| Slc25a33    | 2363.7004  | 0.25230254 | 0.27132276 | 0.92989817 | 0.35242381 | 0.64439796 |
| Prr5        | 870.88238  | 0.25224175 | 0.24248129 | 1.04025241 | 0.29822265 | 0.59275818 |
| Smad1       | 1626.33209 | 0.25218404 | 0.23211927 | 1.08644165 | 0.27728364 | 0.56955371 |
| Apbb1ip     | 1.92427389 | 0.25218108 | 0.33838331 | 0.74525272 | 0.45611896 | NA         |
| Rcan3       | 3299.39345 | 0.25205149 | 0.233694   | 1.07855353 | 0.28078681 | 0.5727329  |
| Prelp       | 3.64160178 | 0.25198276 | 0.29955135 | 0.84120055 | 0.40023559 | NA         |
| Fcamr       | 4.56611834 | 0.25196737 | 0.31492899 | 0.80007678 | 0.42366631 | NA         |
| Gm20597     | 2.83619565 | 0.25185152 | 0.30976467 | 0.81304147 | 0.41619428 | NA         |
| Aff1        | 16425.9816 | 0.25183522 | 0.2490562  | 1.01115823 | 0.31194071 | 0.60644954 |
| Apom        | 384.490866 | 0.25183498 | 0.35177154 | 0.71590492 | 0.47405006 | 0.74015587 |
| Tgoln1      | 4779.29887 | 0.25177139 | 0.17326571 | 1.45309414 | 0.14619762 | 0.41023442 |
| Marcks      | 4463.99384 | 0.25177075 | 0.29866692 | 0.8429817  | 0.39923868 | 0.68479492 |
| Gpr182      | 47.6236783 | 0.25175618 | 0.41439808 | 0.60752255 | 0.54350418 | 0.78603486 |
| Scn5a       | 6.29125541 | 0.2517354  | 0.41822426 | 0.60191487 | 0.54723081 | 0.78821846 |
| Med28       | 5543.97468 | 0.25163367 | 0.2087776  | 1.20527139 | 0.22809855 | 0.51866656 |
| 1600014C10F | 890.44635  | 0.2516318  | 0.18130823 | 1.38786748 | 0.1651774  | 0.43856476 |
| Mybpc3      | 197.874745 | 0.25154194 | 0.37086626 | 0.67825512 | 0.49760995 | 0.75633679 |
| Bsdc1       | 3368.96242 | 0.25142871 | 0.1912894  | 1.31438911 | 0.18871529 | 0.47007972 |
| Zer1        | 1418.22616 | 0.25113256 | 0.19514117 | 1.28692761 | 0.19811952 | 0.4811611  |
| Trappc3     | 2561.33318 | 0.25110158 | 0.18252385 | 1.37571926 | 0.16890857 | 0.44384879 |
| Polr1d      | 5062.00359 | 0.25106894 | 0.19669268 | 1.2764529  | 0.20179547 | 0.4862289  |
| 1700026D08I | 11.3449347 | 0.25094517 | 0.42206709 | 0.59456229 | 0.55213609 | 0.79179683 |
| Upk3b       | 43.0757488 | 0.25091362 | 0.38269265 | 0.6556531  | 0.51204735 | 0.76528308 |
| Gas8        | 600.531259 | 0.25059636 | 0.28140771 | 0.89050994 | 0.37319213 | 0.66295532 |
| Nod1        | 4436.28726 | 0.25053451 | 0.41214217 | 0.60788371 | 0.54326461 | 0.78596222 |
| Elf5        | 11.1989123 | 0.25042973 | 0.42171215 | 0.59384044 | 0.55261884 | 0.79190707 |
| Tbc1d8      | 2424.95373 | 0.25033432 | 0.29217814 | 0.85678662 | 0.39156282 | 0.67959748 |
| Gm5424      | 282.602624 | 0.25025126 | 0.26107238 | 0.95855127 | 0.33778485 | 0.63097804 |
| Hhipl1      | 21.8373638 | 0.25024262 | 0.41952413 | 0.5964916  | 0.55084686 | 0.79097822 |
| Tmem184c    | 3036.0468  | 0.25022722 | 0.22070108 | 1.13378337 | 0.25688543 | 0.54993313 |
| Abat        | 222.375133 | 0.2502243  | 0.29513176 | 0.84783929 | 0.39652748 | 0.68311652 |
| Spata31d1d  | 3.05950237 | 0.25019667 | 0.34222699 | 0.73108399 | 0.46472785 | NA         |
| BC049635    | 4.74538762 | 0.25018492 | 0.39339429 | 0.63596481 | 0.52479936 | NA         |
| Efcab12     | 208.182233 | 0.25018155 | 0.27786917 | 0.90035738 | 0.3679301  | 0.6582285  |
| Lym7os      | 1.44875601 | 0.25011029 | 0.27019987 | 0.92564917 | 0.35462833 | NA         |
| Gtf3c1      | 12296.6719 | 0.25009753 | 0.21939122 | 1.13996147 | 0.25430235 | 0.54743299 |

|             |            |            |            |            |            |            |
|-------------|------------|------------|------------|------------|------------|------------|
| Pard6a      | 462.553238 | 0.25008987 | 0.2371053  | 1.05476288 | 0.29153378 | 0.58528813 |
| Npb         | 57.9044868 | 0.25003977 | 0.39049581 | 0.64031358 | 0.52196875 | 0.77078493 |
| Trmt44      | 2386.03741 | 0.24993901 | 0.18874768 | 1.32419645 | 0.18543781 | 0.46600774 |
| Tuft1       | 836.329862 | 0.24987017 | 0.30771943 | 0.81200649 | 0.41678791 | 0.69852668 |
| Atp6v1e1    | 9610.94607 | 0.24968178 | 0.207847   | 1.20127677 | 0.22964386 | 0.52065777 |
| C1qtnf2     | 5.51322756 | 0.24951771 | 0.39911183 | 0.62518245 | 0.53185132 | NA         |
| Cst9        | 1.76981668 | 0.24950266 | 0.23542753 | 1.05978538 | 0.28924225 | NA         |
| Ino80c      | 3298.50203 | 0.24937412 | 0.17984321 | 1.38661959 | 0.16555779 | 0.43912489 |
| 6430550D23I | 22.9139499 | 0.24932471 | 0.43042512 | 0.57925225 | 0.56241898 | 0.79942162 |
| Kis2        | 6.24405904 | 0.24900579 | 0.41328475 | 0.60250417 | 0.54683859 | 0.7879178  |
| Rhbdl3      | 80.9664172 | 0.24897802 | 0.39995676 | 0.62251236 | 0.53360502 | 0.77945629 |
| Slc22a23    | 777.141989 | 0.24894618 | 0.25239674 | 0.9863288  | 0.32397179 | 0.618534   |
| Pspc1       | 6887.26476 | 0.24870855 | 0.19201029 | 1.29528761 | 0.19522103 | 0.47806832 |
| Ndufa2      | 4261.49707 | 0.24864578 | 0.24746522 | 1.00477059 | 0.31500733 | 0.6093449  |
| Rb1         | 1546.45503 | 0.24859798 | 0.29486007 | 0.84310492 | 0.39916977 | 0.6847754  |
| Usp13       | 1191.30501 | 0.24857819 | 0.17706583 | 1.40387446 | 0.16035624 | 0.43166    |
| Stim1       | 1565.4678  | 0.24840658 | 0.1923558  | 1.29139117 | 0.19656807 | 0.47963252 |
| Krt71       | 1.06843131 | 0.24831901 | 0.23585447 | 1.05284847 | 0.29241045 | NA         |
| Zfp28       | 927.862373 | 0.24818119 | 0.2220681  | 1.11759045 | 0.26374195 | 0.55545112 |
| Trim46      | 49.7762395 | 0.24817467 | 0.41191258 | 0.60249354 | 0.54684566 | 0.7879178  |
| Dnase1l1    | 137.17794  | 0.24813242 | 0.32128898 | 0.77230292 | 0.43993504 | 0.71398766 |
| 1700029I15R | 10.0659407 | 0.24784096 | 0.43223854 | 0.5733893  | 0.56638113 | 0.80234403 |
| Apba2       | 74.6897022 | 0.24780429 | 0.37765841 | 0.65615987 | 0.51172126 | 0.76525833 |
| 4-Mar       | 3.03076735 | 0.24780132 | 0.34127864 | 0.72609676 | 0.46777946 | NA         |
| Gm11529     | 2.00759835 | 0.24774709 | 0.31965659 | 0.77504141 | 0.43831519 | NA         |
| Itga3       | 2425.37543 | 0.24768512 | 0.23338058 | 1.06129276 | 0.28855688 | 0.5820921  |
| 2610037D02I | 203.057317 | 0.24760262 | 0.42742973 | 0.57928263 | 0.56239848 | 0.79942162 |
| Pde6a       | 32.3842856 | 0.24758292 | 0.4320384  | 0.57305766 | 0.56660565 | 0.80239311 |
| Prrg1       | 176.695934 | 0.24754676 | 0.42586232 | 0.58128355 | 0.56104937 | 0.79905474 |
| Nrg1        | 19.079587  | 0.24752758 | 0.43001757 | 0.57562202 | 0.56487069 | 0.80125038 |
| Ptgs2os     | 1.08098114 | 0.24745461 | 0.23547377 | 1.05087973 | 0.29331383 | NA         |
| Bcan        | 200.597406 | 0.24733031 | 0.32371248 | 0.76404316 | 0.44484152 | 0.71820292 |
| Rpa3        | 4114.01335 | 0.24726448 | 0.19319498 | 1.27987012 | 0.20059082 | 0.48436526 |
| Gpn3        | 5324.2861  | 0.24704594 | 0.15528869 | 1.5908817  | 0.1116362  | 0.35343131 |
| Col9a3      | 262.417092 | 0.24704339 | 0.30130264 | 0.81991779 | 0.41226297 | 0.69481971 |
| Tuba1a      | 7367.61005 | 0.24699415 | 0.22862707 | 1.0803364  | 0.27999241 | 0.5723512  |
| Gm5535      | 22.7762293 | 0.24695893 | 0.42023776 | 0.58766477 | 0.55675732 | 0.79571116 |
| Gpr1        | 5.35709782 | 0.24669836 | 0.36007721 | 0.68512629 | 0.49326423 | NA         |
| Gpaa1       | 2231.73334 | 0.24656988 | 0.20662393 | 1.19332685 | 0.23274139 | 0.52452319 |
| Apip        | 1490.93568 | 0.24655096 | 0.18842748 | 1.30846604 | 0.19071529 | 0.47286566 |
| Rchy1       | 3313.43889 | 0.24633498 | 0.1508114  | 1.63339759 | 0.1023854  | 0.33618991 |

|             |            |            |            |            |            |            |
|-------------|------------|------------|------------|------------|------------|------------|
| Trip12      | 59663.9932 | 0.24625526 | 0.1824601  | 1.34963897 | 0.17713182 | 0.45462566 |
| A430105119R | 112.688762 | 0.2462409  | 0.38353367 | 0.64203203 | 0.52085239 | 0.76986886 |
| H1fx        | 1120.47356 | 0.2461402  | 0.25380053 | 0.96981751 | 0.33213747 | 0.62548022 |
| Nlgn3       | 15.9091246 | 0.2460318  | 0.42357047 | 0.58085212 | 0.56134013 | 0.79905798 |
| Rapgef3     | 677.421375 | 0.24588458 | 0.43022592 | 0.57152434 | 0.56764427 | 0.80306738 |
| Cryba1      | 8.41643558 | 0.24580573 | 0.42375526 | 0.58006533 | 0.56187056 | 0.79905798 |
| Rdh10       | 362.879266 | 0.24563856 | 0.2308533  | 1.0640461  | 0.28730782 | 0.58077783 |
| 2-Mar       | 1550.60364 | 0.24555724 | 0.2216646  | 1.10778735 | 0.26795366 | 0.56067606 |
| Dock5       | 8840.9783  | 0.24552522 | 0.28151445 | 0.87215853 | 0.3831219  | 0.67230069 |
| 2610016A17f | 2.53876348 | 0.2454931  | 0.33572763 | 0.73122697 | 0.46464053 | NA         |
| Tmem229b    | 935.057138 | 0.24548376 | 0.33976405 | 0.72251246 | 0.46997947 | 0.73765956 |
| Mir6955     | 2.82056033 | 0.24531237 | 0.35760106 | 0.68599451 | 0.49271657 | NA         |
| Fyn         | 1377.20338 | 0.2450175  | 0.29636383 | 0.82674565 | 0.40838124 | 0.69198369 |
| Timm8b      | 4743.274   | 0.24497884 | 0.19983895 | 1.22588136 | 0.22024332 | 0.50877701 |
| Apex1       | 19231.9501 | 0.24495374 | 0.20529824 | 1.19316043 | 0.23280655 | 0.52452319 |
| 4833418N02l | 4.95372386 | 0.24491543 | 0.37604253 | 0.65129717 | 0.51485467 | NA         |
| Klhdcl10    | 4980.55852 | 0.24491296 | 0.16745561 | 1.46255454 | 0.14358931 | 0.40525542 |
| Ccl7        | 4.785453   | 0.24488416 | 0.25171135 | 0.9728769  | NA         | NA         |
| Mos         | 7.7470337  | 0.2448281  | 0.41175817 | 0.59459196 | 0.55211625 | 0.79179683 |
| En2         | 1093.14958 | 0.24450054 | 0.22803515 | 1.07220548 | 0.28362775 | 0.57603436 |
| Tekt2       | 154.883138 | 0.24444052 | 0.30510137 | 0.80117805 | 0.42302858 | 0.70208297 |
| Wfdc13      | 3.8549613  | 0.24438827 | 0.34599266 | 0.70633947 | 0.47997705 | NA         |
| Naa50       | 31208.4531 | 0.24429749 | 0.22345318 | 1.09328266 | 0.27426971 | 0.56699234 |
| Scgn        | 4.93223391 | 0.24429618 | 0.33411318 | 0.73117794 | 0.46467047 | NA         |
| Rhpn1       | 164.972932 | 0.24428839 | 0.33890752 | 0.72081134 | 0.4710256  | 0.73829186 |
| Endou       | 5.81172839 | 0.24426442 | 0.37576707 | 0.65004211 | 0.51566502 | NA         |
| Ppme1       | 4001.27417 | 0.24423731 | 0.18258948 | 1.33763078 | 0.18101682 | 0.45966568 |
| Slc27a5     | 66.0540836 | 0.24421091 | 0.35406935 | 0.68972621 | 0.49036638 | 0.75122526 |
| Epha3       | 3.28984619 | 0.24404069 | 0.30012645 | 0.81312622 | 0.4161457  | NA         |
| 1700008J07R | 93.2123686 | 0.24403489 | 0.34485415 | 0.70764667 | 0.4791647  | 0.7432908  |
| Hspb1       | 12265.2181 | 0.24393693 | 0.29610601 | 0.82381619 | 0.410044   | 0.69303275 |
| Setd1b      | 1099.76977 | 0.24383379 | 0.30975773 | 0.78717579 | 0.43117897 | 0.70688509 |
| Mllt11      | 1041.20136 | 0.24374034 | 0.21659678 | 1.12531839 | 0.26045414 | 0.5523497  |
| Slc5a2      | 8.80614487 | 0.24372511 | 0.42892877 | 0.56821816 | 0.56988684 | 0.80449796 |
| Ucp1        | 7.33626326 | 0.24362665 | 0.39365776 | 0.61887933 | 0.53599586 | 0.78060232 |
| Trib1       | 1138.77212 | 0.24356839 | 0.27747487 | 0.87780344 | 0.3800504  | 0.66894892 |
| Ccdc181     | 663.631578 | 0.24350979 | 0.26618863 | 0.9148016  | 0.36029579 | 0.65127023 |
| Slc45a1     | 31.3587636 | 0.24349811 | 0.42455975 | 0.57353083 | 0.56628533 | 0.80232354 |
| Ly6k        | 231.563669 | 0.24344189 | 0.39724855 | 0.61282008 | 0.53999531 | 0.78381188 |
| Fam117a     | 2810.16721 | 0.24343283 | 0.20826778 | 1.16884535 | 0.24246594 | 0.53472044 |
| Ciapin1     | 8928.33838 | 0.24338505 | 0.25828872 | 0.94229841 | 0.34603988 | 0.63804944 |

|             |            |            |            |            |            |            |
|-------------|------------|------------|------------|------------|------------|------------|
| A330076C08I | 2.9228836  | 0.24335062 | 0.32127242 | 0.7574588  | 0.44877504 | NA         |
| Gm11564     | 1.44098624 | 0.24334723 | 0.26304664 | 0.92511058 | 0.35490839 | NA         |
| Pla2g4b     | 4.48729294 | 0.2432302  | 0.38785056 | 0.6271235  | 0.53057828 | NA         |
| 2410016O06I | 1994.91299 | 0.24322817 | 0.1795652  | 1.35453959 | 0.17556429 | 0.45314528 |
| Gnptg       | 1160.8006  | 0.24319537 | 0.20608265 | 1.18008657 | 0.23796578 | 0.52998296 |
| Gm16432     | 1.56403215 | 0.2431734  | 0.30258446 | 0.80365464 | 0.42159646 | NA         |
| Chrn4       | 126.165825 | 0.24313934 | 0.33228502 | 0.73171922 | 0.46433996 | 0.73391104 |
| Sncb        | 30.2373426 | 0.24288616 | 0.4315417  | 0.56283358 | 0.57354821 | 0.80644198 |
| Znhit2      | 623.168709 | 0.24280608 | 0.23419954 | 1.03674873 | 0.29985297 | 0.59469629 |
| Zscan4b     | 6.46929318 | 0.24275099 | 0.36288129 | 0.66895428 | 0.50352464 | 0.75979694 |
| Prr24       | 133.626895 | 0.24267903 | 0.27967207 | 0.8677271  | 0.38554375 | 0.67464733 |
| Hoxd3os1    | 1.90185364 | 0.24248755 | 0.28971079 | 0.83699867 | 0.40259332 | NA         |
| Fam83a      | 11.2269852 | 0.24225505 | 0.43194384 | 0.56084848 | 0.57490083 | 0.80673793 |
| Ranbp9      | 3978.55197 | 0.24215601 | 0.19017523 | 1.27333094 | 0.20290063 | 0.48733798 |
| Sdhaf2      | 2426.28618 | 0.24208795 | 0.16189652 | 1.49532525 | 0.13482958 | 0.39242882 |
| Ermap       | 4.94871325 | 0.24203535 | 0.37456188 | 0.64618256 | 0.51816113 | NA         |
| Cox5a       | 27073.7545 | 0.24194672 | 0.20648787 | 1.17172367 | 0.24130802 | 0.53389786 |
| Srr         | 367.988383 | 0.24188055 | 0.25307768 | 0.95575616 | 0.33919544 | 0.63270101 |
| Reep3       | 1960.38873 | 0.2418619  | 0.2140404  | 1.12998245 | 0.25848362 | 0.55101833 |
| Zfp579      | 94.3572252 | 0.24184041 | 0.36366249 | 0.66501336 | 0.50604195 | 0.76151896 |
| Lrrc23      | 12.4509183 | 0.24182471 | 0.43208569 | 0.55966841 | 0.57570564 | 0.80714793 |
| Clk1        | 9964.98246 | 0.24178903 | 0.20115228 | 1.20201981 | 0.22935585 | 0.52030092 |
| Brf2        | 931.099529 | 0.24168628 | 0.21595146 | 1.11916946 | 0.26306785 | 0.55523455 |
| 2610528J11R | 16.0402693 | 0.24164389 | 0.39868378 | 0.60610414 | 0.5444456  | 0.78623679 |
| Styx1       | 5.01450713 | 0.24162309 | 0.39652419 | 0.6093527  | 0.54229068 | NA         |
| Rasef       | 3.56968002 | 0.24142405 | 0.37033899 | 0.65190016 | 0.51446558 | NA         |
| Prpf6       | 11066.4633 | 0.24138356 | 0.1823985  | 1.32338567 | 0.18570715 | 0.46639728 |
| Gtf2f1      | 8974.84818 | 0.24104233 | 0.17576589 | 1.37138286 | 0.17025564 | 0.44577531 |
| Srd5a2      | 2.68189234 | 0.24102787 | 0.36294409 | 0.66409089 | 0.50663214 | NA         |
| Adam25      | 3.61119077 | 0.24098595 | 0.23125184 | 1.04209313 | NA         | NA         |
| Zdhhc12     | 2891.97858 | 0.2409274  | 0.21628592 | 1.11393009 | 0.26530918 | 0.55724244 |
| Ankrd44     | 398.372442 | 0.24082122 | 0.39022881 | 0.61712824 | 0.53715014 | 0.78111295 |
| Cep19       | 1425.68608 | 0.24071769 | 0.17940396 | 1.3417635  | 0.17967269 | 0.45797246 |
| Susd3       | 54.9220098 | 0.24070434 | 0.38468065 | 0.6257251  | 0.53149527 | 0.7782358  |
| Bmpr2       | 1749.45319 | 0.24070179 | 0.27412263 | 0.87808067 | 0.37989994 | 0.66890318 |
| Ovgp1       | 125.989639 | 0.24067662 | 0.32438154 | 0.74195534 | 0.45811439 | 0.72881196 |
| Nomo1       | 10865.3395 | 0.24058113 | 0.18972701 | 1.2680384  | 0.20478424 | 0.49017049 |
| Rerg        | 661.673444 | 0.24052467 | 0.31719329 | 0.75829053 | 0.44827707 | 0.72108696 |
| Ppa2        | 3863.02504 | 0.24050337 | 0.19704881 | 1.22052684 | 0.22226522 | 0.51090346 |
| Tnn         | 2.06457602 | 0.24049713 | 0.31674041 | 0.7592878  | 0.44768042 | NA         |
| 9430016H08I | 1792.29828 | 0.24037806 | 0.19343863 | 1.242658   | 0.21399389 | 0.50087582 |



|             |            |            |            |            |            |            |
|-------------|------------|------------|------------|------------|------------|------------|
| H2-Eb1      | 1666.17814 | 0.24034633 | 0.43201835 | 0.55633362 | 0.57798281 | 0.80768356 |
| Becn2       | 4.67302687 | 0.24032271 | 0.38310177 | 0.62730776 | 0.53045752 | NA         |
| Fem1a       | 2095.66374 | 0.24026336 | 0.19315825 | 1.243868   | 0.21354815 | 0.50028431 |
| B4galt7     | 838.765132 | 0.24025968 | 0.18402595 | 1.30557502 | 0.19169712 | 0.47424147 |
| Pgm2        | 4524.00313 | 0.23998395 | 0.43043255 | 0.55754136 | 0.57715761 | 0.80734073 |
| 4632427E13F | 17.0453503 | 0.23976921 | 0.42627867 | 0.56247058 | 0.57379545 | 0.80652888 |
| Tcp11l1     | 171.626537 | 0.23963829 | 0.25496867 | 0.93987347 | 0.34728247 | 0.63972138 |
| Ckm         | 21.6055393 | 0.23962648 | 0.42907601 | 0.55847094 | 0.57652284 | 0.80734073 |
| Glrx2       | 1333.00666 | 0.23952968 | 0.20464121 | 1.17048608 | 0.24180541 | 0.53421167 |
| Tlcd1       | 1258.27116 | 0.23940112 | 0.22921271 | 1.04444958 | 0.29627744 | 0.59107253 |
| Tmcc1       | 1688.35779 | 0.23920709 | 0.19064663 | 1.25471445 | 0.20958244 | 0.49577373 |
| Spta1       | 181.041522 | 0.23918853 | 0.41753664 | 0.57285638 | 0.56674194 | 0.80244906 |
| Sirt2       | 1421.61508 | 0.23914095 | 0.23552205 | 1.01536543 | 0.30993167 | 0.60466031 |
| Ift20       | 1508.955   | 0.23909342 | 0.21384818 | 1.11805215 | 0.26354472 | 0.55541671 |
| Nedd4l      | 3011.05353 | 0.23901503 | 0.24246712 | 0.98576265 | 0.3242496  | 0.618534   |
| Snx3        | 11039.7057 | 0.2389819  | 0.15596828 | 1.53224678 | 0.12546155 | 0.37863766 |
| Krt222      | 30.8891746 | 0.23892045 | 0.42645765 | 0.56024428 | 0.57531283 | 0.80709877 |
| Tcf7l1      | 5839.06981 | 0.23888814 | 0.21180026 | 1.12789353 | 0.25936489 | 0.55144791 |
| 4930459C07F | 1.09353097 | 0.23888368 | 0.23185929 | 1.03029594 | 0.3028711  | NA         |
| Rnf41       | 2180.6521  | 0.23883349 | 0.22117283 | 1.07985001 | 0.28020898 | 0.57238012 |
| Dnajc25     | 513.697209 | 0.23875907 | 0.21453118 | 1.11293414 | 0.26573671 | 0.55776375 |
| Chsy3       | 30.9777776 | 0.2387069  | 0.4198963  | 0.56849012 | 0.56970221 | 0.8044622  |
| Atoh8       | 5.76147455 | 0.23864903 | 0.41480103 | 0.57533375 | 0.5650656  | NA         |
| Them4       | 412.637407 | 0.238523   | 0.29119882 | 0.81910703 | 0.41272535 | 0.69515344 |
| Uts2r       | 6.16689891 | 0.23830324 | 0.41783965 | 0.57032223 | 0.56845917 | 0.80350014 |
| Tmem158     | 255.659127 | 0.23829043 | 0.38346621 | 0.62141179 | 0.53432871 | 0.77984269 |
| Hdx         | 216.254644 | 0.23823699 | 0.31546093 | 0.75520284 | 0.45012728 | 0.72275987 |
| Tmem37      | 268.229875 | 0.23821457 | 0.28511629 | 0.83549967 | 0.40343643 | 0.68784563 |
| Cabyr       | 19.668773  | 0.23808698 | 0.42702759 | 0.55754473 | 0.57715531 | 0.80734073 |
| Ap2a2       | 10692.9097 | 0.23797568 | 0.17171881 | 1.38584518 | 0.16579418 | 0.43945208 |
| Rnls        | 77.1219329 | 0.23793116 | 0.32101011 | 0.74119521 | 0.45857509 | 0.72916661 |
| Ralbp1      | 11899.8687 | 0.23790732 | 0.17588656 | 1.35261799 | 0.1761777  | 0.45380054 |
| Snord89     | 7.14661825 | 0.23767358 | 0.42339326 | 0.5613542  | 0.5745561  | 0.806724   |
| Zfp410      | 2924.9762  | 0.23741994 | 0.14769589 | 1.6074918  | 0.10794653 | 0.34704909 |
| Snrpb2      | 10015.1199 | 0.23737632 | 0.17824167 | 1.33176675 | 0.18293685 | 0.46301256 |
| Pigh        | 1224.03981 | 0.23736569 | 0.19523155 | 1.21581624 | 0.22405493 | 0.51323805 |
| Mbd5        | 709.461118 | 0.23734896 | 0.26561927 | 0.89356829 | 0.37155292 | 0.66164325 |
| Gchfr       | 46.1991898 | 0.23730529 | 0.36836935 | 0.64420476 | 0.51944266 | 0.76946589 |
| Npas1       | 4.17054582 | 0.23721491 | 0.40109838 | 0.59141328 | 0.55424354 | NA         |
| Bak1        | 4850.67855 | 0.23721089 | 0.18825459 | 1.26005368 | 0.20765    | 0.49330356 |
| Emb         | 5024.28421 | 0.23717233 | 0.3642514  | 0.65112263 | 0.51496733 | 0.76651865 |

|             |            |            |            |            |            |            |
|-------------|------------|------------|------------|------------|------------|------------|
| Arhgef10l   | 3037.55802 | 0.23685056 | 0.16670914 | 1.42074127 | 0.15539199 | 0.4238164  |
| Ccdc87      | 27.1411058 | 0.2368392  | 0.41755119 | 0.56720998 | 0.57057153 | 0.80487644 |
| Nphp4       | 588.60438  | 0.23681812 | 0.24800118 | 0.95490725 | 0.3396246  | 0.63312181 |
| Rsph4a      | 53.6731759 | 0.23673196 | 0.42521343 | 0.5567368  | 0.57770727 | 0.80754389 |
| Fam120c     | 637.432082 | 0.23657844 | 0.35602647 | 0.66449677 | 0.50637241 | 0.7617875  |
| Rnf111      | 4974.63983 | 0.23639502 | 0.25380158 | 0.93141667 | 0.35163807 | 0.64386244 |
| Nxpe5       | 2.08102654 | 0.23638684 | 0.30979649 | 0.76303911 | 0.44544007 | NA         |
| Fam110c     | 12.8724524 | 0.23637756 | 0.43206965 | 0.54708208 | 0.58432234 | 0.81148483 |
| Mmp13       | 2.97270188 | 0.2363755  | 0.26193802 | 0.90241004 | 0.36683909 | NA         |
| Glrx5       | 1920.43756 | 0.23613019 | 0.2080289  | 1.13508359 | 0.2563403  | 0.54923505 |
| 1700007G11l | 2.37361157 | 0.23608343 | 0.33438221 | 0.70602867 | 0.48017031 | NA         |
| Kcp         | 211.669587 | 0.2360606  | 0.25738444 | 0.91715179 | 0.35906311 | 0.65010948 |
| Nmrk1       | 1342.97565 | 0.23605541 | 0.2311493  | 1.02122489 | 0.3071479  | 0.60163387 |
| Pde4a       | 1208.35255 | 0.23592088 | 0.1834051  | 1.28633761 | 0.19832526 | 0.48126148 |
| Dcbld2      | 5901.96228 | 0.23572118 | 0.19602463 | 1.20250792 | 0.2291668  | 0.52010696 |
| Slc26a6     | 636.864849 | 0.2356988  | 0.21085417 | 1.11782847 | 0.26364026 | 0.55541671 |
| Faim        | 1996.38162 | 0.23560716 | 0.18313633 | 1.2865124  | 0.19826429 | 0.48122491 |
| Itsn1       | 5551.32015 | 0.23557415 | 0.22704145 | 1.0375821  | 0.29946466 | 0.59422928 |
| Gpr160      | 1510.39822 | 0.2354334  | 0.19608656 | 1.20066053 | 0.22988291 | 0.52104783 |
| Chtop       | 15755.1014 | 0.23538044 | 0.17293458 | 1.36109528 | 0.17348358 | 0.45091813 |
| Anxa10      | 4.75818665 | 0.23534534 | 0.39987214 | 0.58855147 | 0.5561622  | NA         |
| Rit1        | 812.813808 | 0.23533981 | 0.20500926 | 1.14794722 | 0.25099035 | 0.54460039 |
| Ano3        | 467.633659 | 0.23531009 | 0.3550244  | 0.66279976 | 0.5074588  | 0.76268405 |
| Card11      | 120.875735 | 0.23525809 | 0.35115229 | 0.6699603  | 0.5028831  | 0.75933521 |
| Cfb         | 22.2532706 | 0.23521897 | 0.43004222 | 0.54696715 | 0.5844013  | 0.81150323 |
| Hmga1       | 76.9106524 | 0.23520584 | 0.34762051 | 0.67661672 | 0.49864917 | 0.75683128 |
| Erp29       | 7848.79906 | 0.23514012 | 0.19661066 | 1.19596833 | 0.23170892 | 0.52302118 |
| Zfp719      | 1222.61421 | 0.23505483 | 0.19372329 | 1.21335345 | 0.22499472 | 0.51439387 |
| Angptl1     | 1.43406714 | 0.23503094 | 0.26714706 | 0.87978112 | 0.3789779  | NA         |
| Lancl3      | 12.9583463 | 0.23494413 | 0.40845537 | 0.57520148 | 0.56515504 | 0.80130617 |
| Gipc2       | 107.337147 | 0.23491557 | 0.42923225 | 0.54729244 | 0.58417784 | 0.81141028 |
| Med21       | 3589.11636 | 0.23484153 | 0.19732159 | 1.19014616 | 0.23398895 | 0.52565461 |
| Gm2016      | 33.7397581 | 0.23482397 | 0.43052816 | 0.54543231 | 0.58545622 | 0.81209791 |
| Slc12a9     | 704.213971 | 0.23475178 | 0.21158798 | 1.10947599 | 0.2672249  | 0.55978401 |
| 1600020E01F | 849.519739 | 0.234695   | 0.23138489 | 1.01430564 | 0.31043693 | 0.604963   |
| Pcdh7       | 3.44704574 | 0.23454303 | 0.22861471 | 1.02593145 | NA         | NA         |
| Ppp1r9b     | 3845.06571 | 0.2344334  | 0.19352971 | 1.21135614 | 0.22575894 | 0.51545695 |
| Sema3a      | 6.59668064 | 0.23425961 | 0.35827351 | 0.65385691 | 0.513204   | 0.76591511 |
| Lrrc19      | 3.41774581 | 0.23425902 | 0.34444697 | 0.68010184 | 0.49643998 | NA         |
| Zpbbp2      | 3.04251147 | 0.23423746 | 0.3750535  | 0.62454412 | 0.53227031 | NA         |
| Twf1        | 11863.2616 | 0.23410839 | 0.16413051 | 1.4263551  | 0.15376587 | 0.42158198 |

|             |            |            |            |            |            |            |
|-------------|------------|------------|------------|------------|------------|------------|
| Rpp25l      | 1772.21834 | 0.23406399 | 0.22921498 | 1.02115486 | 0.30718108 | 0.60163387 |
| Tchp        | 1300.38854 | 0.23373915 | 0.16056855 | 1.45569694 | 0.14547642 | 0.4089048  |
| Cox6a1      | 14247.5781 | 0.23372523 | 0.23933651 | 0.97655487 | 0.32878957 | 0.62222868 |
| 4930469G21f | 3.51733508 | 0.23356065 | 0.30085733 | 0.77631697 | 0.43756186 | NA         |
| Dlx6        | 10.3445488 | 0.23352946 | 0.42793924 | 0.54570705 | 0.58526732 | 0.81209791 |
| Spint4      | 1.89741258 | 0.23352094 | 0.33043466 | 0.70670838 | 0.47974772 | NA         |
| Itih3       | 5.53152085 | 0.23333498 | 0.37668896 | 0.61943675 | 0.53562868 | NA         |
| E230016M11  | 47.7291806 | 0.23325569 | 0.37713245 | 0.61849807 | 0.53624707 | 0.78076585 |
| Tex19.2     | 191.461077 | 0.23317347 | 0.35890367 | 0.64968261 | 0.51589726 | 0.76711938 |
| Dock4       | 1048.63325 | 0.23286955 | 0.35583116 | 0.65443832 | 0.51282945 | 0.76557654 |
| Glmn        | 1878.93272 | 0.23274347 | 0.22779904 | 1.02170524 | 0.30692043 | 0.60142636 |
| Wfs1        | 2470.97234 | 0.23273147 | 0.22022482 | 1.05679038 | 0.29060727 | 0.58458789 |
| Tceb2       | 10483.2938 | 0.23265136 | 0.20663231 | 1.12591956 | 0.26019957 | 0.55228465 |
| 1110020A21f | 25.0417014 | 0.23256918 | 0.41108963 | 0.56573838 | 0.57157164 | 0.80538015 |
| Mex3a       | 5351.774   | 0.23236693 | 0.2026656  | 1.14655341 | 0.25156624 | 0.5450894  |
| AF357399    | 52.2747605 | 0.23236013 | 0.33934476 | 0.68473175 | 0.49351321 | 0.75389233 |
| Trmt6       | 5661.12421 | 0.23228234 | 0.17326716 | 1.34060225 | 0.18004963 | 0.45863256 |
| Trem1       | 1.04333165 | 0.23224121 | 0.22909784 | 1.01372061 | 0.31071609 | NA         |
| Hypk        | 8029.9725  | 0.23221347 | 0.22407107 | 1.03633849 | 0.30004425 | 0.59492391 |
| Gt(ROSA)26S | 559.768213 | 0.23215597 | 0.28797751 | 0.80616008 | 0.42015055 | 0.7004461  |
| Tex261      | 2149.84495 | 0.23215162 | 0.18629421 | 1.24615589 | 0.21270717 | 0.49936733 |
| 2210016L21f | 1865.10035 | 0.23208677 | 0.17351915 | 1.33752828 | 0.18105026 | 0.45967552 |
| Magix       | 10.9677235 | 0.23203237 | 0.43211893 | 0.53696414 | 0.59129239 | 0.81611679 |
| Tmem45b     | 10.7489441 | 0.23191859 | 0.43087213 | 0.53825386 | 0.5904018  | 0.8154987  |
| Tek         | 1717.93853 | 0.23187357 | 0.27708847 | 0.83682141 | 0.40269296 | 0.68718076 |
| Tmem70      | 2613.71036 | 0.23158333 | 0.20897657 | 1.10817843 | 0.26778476 | 0.56062478 |
| Ass1        | 10395.3529 | 0.23124681 | 0.21141507 | 1.09380479 | 0.2740406  | 0.56692432 |
| Styk1       | 10.5143476 | 0.23119134 | 0.41192604 | 0.56124478 | 0.57463068 | 0.806724   |
| Rab20       | 32.4521077 | 0.23108024 | 0.39835687 | 0.58008348 | 0.56185832 | 0.79905798 |
| Esp24       | 2.10035472 | 0.23102499 | 0.30977514 | 0.74578286 | 0.4557986  | NA         |
| Anapc7      | 5000.57257 | 0.2309307  | 0.17503551 | 1.31933626 | 0.18705672 | 0.46812344 |
| Fam26d      | 4.15431213 | 0.23089459 | 0.34859707 | 0.6623538  | 0.50774451 | NA         |
| Tmem251     | 956.631659 | 0.23072929 | 0.19340644 | 1.19297628 | 0.23287866 | 0.52452319 |
| Ulk2        | 598.323895 | 0.23066987 | 0.29974965 | 0.76954173 | 0.44157178 | 0.71556426 |
| Heatr5b     | 3831.87233 | 0.23064972 | 0.22489716 | 1.02557865 | 0.30509024 | 0.59970116 |
| Lgals4      | 11.5712626 | 0.2305686  | 0.43144449 | 0.53441081 | 0.59305734 | 0.81705522 |
| 4932413F04f | 2.11012279 | 0.23053648 | 0.32242439 | 0.71500944 | 0.47460321 | NA         |
| 1810026J23R | 3127.40344 | 0.23045291 | 0.16768802 | 1.37429561 | 0.16934993 | 0.44440782 |
| Ints9       | 3820.63236 | 0.23039268 | 0.21561485 | 1.0685381  | 0.28527785 | 0.57825285 |
| Psmas8      | 3022.2114  | 0.23038963 | 0.25398323 | 0.90710566 | 0.36435093 | 0.65441876 |
| Gm16677     | 2.35566765 | 0.23017092 | 0.33225474 | 0.69275435 | 0.48846372 | NA         |

|             |            |            |            |            |            |            |
|-------------|------------|------------|------------|------------|------------|------------|
| Trpm5       | 8.50404388 | 0.23001767 | 0.42208851 | 0.54495128 | 0.58578702 | 0.81241184 |
| Add1        | 14162.7622 | 0.22995532 | 0.22232394 | 1.03432548 | 0.30098403 | 0.59564809 |
| Gm4763      | 1.79843965 | 0.22979618 | 0.22719144 | 1.01146494 | 0.31179395 | NA         |
| 2510003E04F | 2604.27362 | 0.2297536  | 0.18788933 | 1.22281348 | 0.22140015 | 0.5096956  |
| Fam171a2    | 214.321415 | 0.22972222 | 0.26759355 | 0.85847441 | 0.39063056 | 0.67903559 |
| Tmem217     | 4.50736043 | 0.22962082 | 0.371428   | 0.61821083 | 0.53643637 | NA         |
| Sh2d4b      | 517.639557 | 0.229528   | 0.3689688  | 0.6220797  | 0.53388946 | 0.77957887 |
| Itfg3       | 2260.22268 | 0.2294255  | 0.1611088  | 1.42404077 | 0.15443467 | 0.42289374 |
| Zfyve1      | 3905.44138 | 0.22928823 | 0.16984681 | 1.3499708  | 0.17702535 | 0.45462566 |
| Pex1        | 2543.85695 | 0.22917157 | 0.18523075 | 1.23722207 | 0.21600465 | 0.50300814 |
| Dpt         | 1.78588982 | 0.22886602 | 0.22679949 | 1.00911171 | 0.31292106 | NA         |
| Ccdc149     | 7.98610608 | 0.2287575  | 0.41285991 | 0.5540802  | 0.57952396 | 0.80819901 |
| Gm13939     | 25.5312137 | 0.22868142 | 0.40448163 | 0.56536911 | 0.57182273 | 0.80538015 |
| Anapc10     | 4153.95096 | 0.22854676 | 0.30723191 | 0.74389006 | 0.45694299 | 0.72746933 |
| Mrps12      | 2778.25265 | 0.22849218 | 0.23285473 | 0.98126491 | 0.32646212 | 0.61957682 |
| Gfer        | 3877.56801 | 0.22848041 | 0.18508012 | 1.23449458 | 0.21701867 | 0.50454989 |
| Ndufa3      | 3830.38637 | 0.22823191 | 0.22246718 | 1.02591271 | 0.30493273 | 0.59964705 |
| Frmd4a      | 3502.15978 | 0.22816853 | 0.23612859 | 0.9662893  | 0.33389944 | 0.62718213 |
| 4930524B15F | 29.1380797 | 0.22815121 | 0.42808514 | 0.53295756 | 0.59406296 | 0.81761864 |
| Coro2b      | 1717.28554 | 0.22811927 | 0.3552786  | 0.64208558 | 0.52081762 | 0.76986886 |
| Cklf        | 636.524176 | 0.22810659 | 0.24088794 | 0.94694069 | 0.343669   | 0.63699603 |
| Phtf2       | 4483.99317 | 0.22803577 | 0.20450028 | 1.11508783 | 0.26481279 | 0.5564253  |
| Naif1       | 299.98883  | 0.22800914 | 0.27969859 | 0.8151959  | 0.41496019 | 0.69724969 |
| Zfp572      | 2.86676306 | 0.22778076 | 0.32939788 | 0.69150646 | 0.48924732 | NA         |
| Smpdl3a     | 43.6276257 | 0.22774703 | 0.40689613 | 0.55971786 | 0.57567189 | 0.80714793 |
| 1700061G19I | 5405.39031 | 0.22764516 | 0.27409315 | 0.83053939 | 0.40623388 | 0.69004294 |
| Chgb        | 12.4587527 | 0.22759048 | 0.43043379 | 0.52874677 | 0.59698113 | 0.81955304 |
| Nkx2-9      | 34.5656949 | 0.22749849 | 0.42054702 | 0.54095852 | 0.58853617 | 0.81419144 |
| 1600016N20I | 407.990019 | 0.22743964 | 0.29060772 | 0.78263454 | 0.43384175 | 0.70858066 |
| Sdf2l1      | 2447.31387 | 0.22728854 | 0.20616464 | 1.10246129 | 0.27026118 | 0.56345778 |
| Tmem176b    | 12.3882457 | 0.22726088 | 0.39529646 | 0.57491252 | 0.56535046 | 0.80151017 |
| Frk         | 108.29286  | 0.2272038  | 0.35669206 | 0.63697465 | 0.52414135 | 0.77186763 |
| C630043F03F | 90.6771525 | 0.22717116 | 0.32240857 | 0.70460645 | 0.48105518 | 0.7445399  |
| Olf815      | 1.26968547 | 0.2270613  | 0.26027622 | 0.87238587 | 0.38299791 | NA         |
| Prss44      | 9.52766461 | 0.22687952 | 0.41963163 | 0.54066353 | 0.58873952 | 0.8143171  |
| Rnpep       | 3984.09859 | 0.22680972 | 0.28296403 | 0.80154966 | 0.42281351 | 0.70197732 |
| Tmem164     | 2091.05813 | 0.22670282 | 0.19287947 | 1.17536003 | 0.23985071 | 0.53178192 |
| Ecm2        | 5.00912559 | 0.22665746 | 0.39752576 | 0.57017051 | 0.56856206 | NA         |
| Zar1l       | 1.89293625 | 0.22662176 | 0.28195419 | 0.80375384 | 0.42153915 | NA         |
| Gsg1        | 6.74123513 | 0.22662164 | 0.416295   | 0.54437751 | 0.58618172 | 0.8126129  |
| Atp11a      | 3145.76892 | 0.22656532 | 0.24014506 | 0.94345193 | 0.34544979 | 0.63779826 |

|             |            |            |            |            |            |            |
|-------------|------------|------------|------------|------------|------------|------------|
| Gm9958      | 62.8451098 | 0.22653016 | 0.40796465 | 0.55526911 | 0.57871061 | 0.80792967 |
| Dtx4        | 102.492022 | 0.22644717 | 0.32133207 | 0.70471387 | 0.48098832 | 0.7445399  |
| 4930478L05F | 1.58233364 | 0.22644048 | 0.22590018 | 1.00239174 | 0.31615443 | NA         |
| 4921509C19F | 2.27234319 | 0.22609435 | 0.34758808 | 0.65046637 | 0.51539102 | NA         |
| Chst10      | 323.108233 | 0.2260136  | 0.28612277 | 0.78991827 | 0.4295755  | 0.70542013 |
| Mrpl13      | 4739.12206 | 0.22583809 | 0.1885282  | 1.19790081 | 0.23095564 | 0.52264131 |
| Zfp959      | 492.451854 | 0.22580607 | 0.20427658 | 1.10539383 | 0.26898897 | 0.56201096 |
| Chrna3      | 1.57796624 | 0.2257924  | 0.29710453 | 0.7599763  | 0.44726875 | NA         |
| Chst7       | 52.3810348 | 0.22578788 | 0.42936819 | 0.52586074 | 0.59898497 | 0.8200579  |
| Cthrc1      | 47.5593342 | 0.22560273 | 0.41992876 | 0.53724048 | 0.59110151 | 0.81607063 |
| Pcmt1       | 3485.19663 | 0.22558401 | 0.15238114 | 1.48039324 | 0.13876833 | 0.39807902 |
| Sntb1       | 279.422033 | 0.22553017 | 0.32050745 | 0.70366593 | 0.48164084 | 0.74482882 |
| Synj1       | 2198.39558 | 0.22552797 | 0.25824205 | 0.87332008 | 0.38248864 | 0.67137416 |
| Ripply2     | 3.66503617 | 0.2252512  | 0.36095374 | 0.62404451 | 0.53259836 | NA         |
| Pthr2       | 2496.22145 | 0.2251656  | 0.24271633 | 0.92769036 | 0.35356821 | 0.64520848 |
| Urm1        | 3328.87756 | 0.22510681 | 0.22968617 | 0.98006256 | 0.32705524 | 0.62039456 |
| Fgf12       | 1.25537398 | 0.22508268 | 0.25969843 | 0.86670789 | 0.38610208 | NA         |
| Il3         | 1.25537398 | 0.22508268 | 0.25969843 | 0.86670789 | 0.38610208 | NA         |
| 1810014B01F | 282.159177 | 0.22486875 | 0.2669456  | 0.8423767  | 0.39957713 | 0.68486983 |
| Abcb1a      | 3033.21899 | 0.22482467 | 0.20550079 | 1.09403308 | 0.27394047 | 0.56683453 |
| Galc        | 984.733099 | 0.22480378 | 0.2754942  | 0.81600187 | 0.41449907 | 0.69678703 |
| Synpr       | 29.6300706 | 0.22477416 | 0.42485125 | 0.52906555 | 0.59675998 | 0.81955304 |
| Prr3        | 1173.19557 | 0.22467856 | 0.18626619 | 1.20622301 | 0.22773152 | 0.51813501 |
| Vmp1        | 4781.59227 | 0.22460394 | 0.19371538 | 1.15945334 | 0.24627145 | 0.53945517 |
| Six1        | 1100.20002 | 0.22444986 | 0.24770682 | 0.90611096 | 0.36487713 | 0.6548418  |
| Tpcn2       | 676.558256 | 0.22439438 | 0.30335825 | 0.73970094 | 0.45948148 | 0.73001598 |
| Mir1839     | 8.21388019 | 0.22433997 | 0.42574339 | 0.52693707 | 0.59823729 | 0.81984777 |
| Pex16       | 754.317243 | 0.22431907 | 0.21504531 | 1.0431247  | 0.29689054 | 0.59123381 |
| Oraov1      | 900.354332 | 0.22408371 | 0.19092043 | 1.17370206 | 0.24051439 | 0.53277151 |
| Gabra5      | 44.9975732 | 0.22391999 | 0.41306317 | 0.54209624 | 0.58775221 | 0.81353146 |
| Kif1b       | 5887.39401 | 0.22391362 | 0.22139664 | 1.01136861 | 0.31184004 | 0.60634544 |
| Epha8       | 1.56365476 | 0.2237182  | 0.29675986 | 0.75386948 | 0.4509276  | NA         |
| Sult2a4     | 1.73702091 | 0.22371301 | 0.24762944 | 0.90341846 | 0.36630384 | NA         |
| Scn10a      | 0.95085316 | 0.2234459  | 0.22544547 | 0.99113059 | 0.32162182 | NA         |
| Fam187b     | 3.21944298 | 0.22317747 | 0.36268553 | 0.61534703 | 0.53832557 | NA         |
| Entpd4      | 1795.91029 | 0.22312112 | 0.19798336 | 1.12696906 | 0.25975556 | 0.55183863 |
| Pop5        | 2945.38235 | 0.22310689 | 0.18253481 | 1.22227038 | 0.2216054  | 0.50979956 |
| 1810011O10I | 10.1848545 | 0.22306684 | 0.42179864 | 0.52884674 | 0.59691177 | 0.81955304 |
| Tdrd1       | 15.256002  | 0.22304858 | 0.43195997 | 0.516364   | 0.60560021 | 0.82418428 |
| Mtfr2       | 1467.49787 | 0.22288885 | 0.17152913 | 1.29942275 | 0.19379889 | 0.47646674 |
| Ormdl2      | 4029.34166 | 0.22286856 | 0.17270837 | 1.29043289 | 0.1969004  | 0.48016279 |

|              |            |            |            |            |            |            |
|--------------|------------|------------|------------|------------|------------|------------|
| Cpeb1        | 495.279598 | 0.22277164 | 0.34227237 | 0.6508607  | 0.51513641 | 0.76651865 |
| 4833427G06l  | 2.29204876 | 0.22274036 | 0.34412774 | 0.64726071 | 0.51746323 | NA         |
| Hddc2        | 2426.31145 | 0.2224422  | 0.2201079  | 1.01060528 | 0.31220539 | 0.60664161 |
| Esrrg        | 0.94369742 | 0.22234707 | 0.22497867 | 0.98830292 | 0.32300432 | NA         |
| Tmco2        | 0.94369742 | 0.22234707 | 0.22497867 | 0.98830292 | 0.32300432 | NA         |
| Samd3        | 0.94369742 | 0.22234707 | 0.22497867 | 0.98830292 | 0.32300432 | NA         |
| Thrb         | 75.6251374 | 0.22197309 | 0.42265659 | 0.52518545 | 0.59945428 | 0.8202282  |
| Tpsb2        | 4.00230184 | 0.22181246 | 0.3660541  | 0.60595539 | 0.54454437 | NA         |
| Pak2         | 9547.85553 | 0.22175804 | 0.17295099 | 1.28220161 | 0.19977193 | 0.48279318 |
| Me2          | 7406.70157 | 0.22155913 | 0.16554032 | 1.33839984 | 0.18076613 | 0.45940417 |
| Orm2         | 0.93830333 | 0.22155284 | 0.22462242 | 0.98633449 | 0.323969   | NA         |
| Tmem180      | 2281.67906 | 0.22150899 | 0.19238704 | 1.15137167 | 0.24957937 | 0.54310658 |
| Me1          | 4982.28134 | 0.22141133 | 0.23197123 | 0.95447755 | 0.33984197 | 0.63329927 |
| Wdyhvj1      | 1353.02801 | 0.22113795 | 0.1853349  | 1.19318032 | 0.23279876 | 0.52452319 |
| 4930549G23l  | 2.80151003 | 0.2210753  | 0.3475264  | 0.6361396  | 0.52468544 | NA         |
| Kdm8         | 471.925009 | 0.22086357 | 0.22102171 | 0.99928452 | 0.31765688 | 0.61159656 |
| Gpr35        | 5.03097921 | 0.2208469  | 0.38974692 | 0.5666418  | 0.57095757 | NA         |
| Hcn1         | 5.39904763 | 0.22083897 | 0.32995583 | 0.66929857 | 0.50330504 | NA         |
| Fbxo41       | 244.039406 | 0.22081783 | 0.31415942 | 0.70288466 | 0.48212763 | 0.74506279 |
| Klrb1a       | 3.93972822 | 0.22079284 | 0.35039222 | 0.63013055 | 0.52860917 | NA         |
| Slc10a3-ubl4 | 4.13289633 | 0.22069741 | 0.39555277 | 0.55794682 | 0.5768807  | NA         |
| Mrps6        | 1142.4471  | 0.2206711  | 0.20353138 | 1.08421168 | 0.27827095 | 0.5707454  |
| Mettl5       | 2782.51204 | 0.22064124 | 0.23868296 | 0.92441137 | 0.35527218 | 0.64696432 |
| Rqcd1        | 11718.3754 | 0.22060782 | 0.16040405 | 1.37532577 | 0.16903047 | 0.44394407 |
| Pcdhgb7      | 41.63599   | 0.22059068 | 0.40322764 | 0.54706238 | 0.58433587 | 0.81148483 |
| Il18r1       | 1.96265834 | 0.22054544 | 0.24593536 | 0.89676183 | 0.36984602 | NA         |
| Supt3        | 840.291134 | 0.22043825 | 0.2095099  | 1.05216151 | 0.29272545 | 0.58651459 |
| Hdgfrp2      | 8770.9853  | 0.22040502 | 0.19030494 | 1.15816761 | 0.24679565 | 0.53964777 |
| Stx7         | 2503.32119 | 0.22039299 | 0.2087659  | 1.05569437 | 0.29110787 | 0.58481055 |
| LOC1026341l  | 12.4968916 | 0.22014751 | 0.43211925 | 0.50946009 | 0.61042976 | 0.82628285 |
| Magee2       | 121.401585 | 0.22005875 | 0.33808635 | 0.6508951  | 0.5151142  | 0.76651865 |
| Ptplad1      | 5130.59722 | 0.21980725 | 0.14518656 | 1.51396412 | 0.13003494 | 0.38569013 |
| Mapk11       | 203.400842 | 0.21976313 | 0.27652136 | 0.79474196 | 0.42676362 | 0.70402942 |
| Disp2        | 8.19949145 | 0.21974367 | 0.42233214 | 0.52031007 | 0.60284748 | 0.82248755 |
| Xrcc4        | 967.231649 | 0.21958164 | 0.2408966  | 0.9115182  | 0.3620224  | 0.65273163 |
| Hsd17b4      | 5507.06634 | 0.21955476 | 0.21266809 | 1.03238224 | 0.30189309 | 0.59705597 |
| Gm15663      | 0.92399185 | 0.21941622 | 0.22368779 | 0.98090387 | 0.32664015 | NA         |
| Rtp1         | 0.92399185 | 0.21941622 | 0.22368779 | 0.98090387 | 0.32664015 | NA         |
| 4921517D22l  | 0.92399185 | 0.21941622 | 0.22368779 | 0.98090387 | 0.32664015 | NA         |
| Ldoc1l       | 270.816188 | 0.21936165 | 0.34385664 | 0.63794507 | 0.52350944 | 0.77157293 |
| 2210011C24f  | 476.202284 | 0.21928962 | 0.34143972 | 0.64224988 | 0.52071095 | 0.76986886 |

|             |            |            |            |            |            |            |
|-------------|------------|------------|------------|------------|------------|------------|
| Tacr1       | 2.59656959 | 0.2191254  | 0.36004379 | 0.60860764 | 0.54278454 | NA         |
| Atxn10      | 17707.1179 | 0.21884147 | 0.15207633 | 1.43902387 | 0.15014376 | 0.41633446 |
| Por         | 3212.70727 | 0.21881309 | 0.17569328 | 1.24542665 | 0.21297496 | 0.4996189  |
| Cdh8        | 1.63054124 | 0.21873573 | 0.29558504 | 0.74000948 | 0.45929424 | NA         |
| Galnt7      | 3254.81603 | 0.21871194 | 0.29726421 | 0.73574933 | 0.46188326 | 0.73203695 |
| Al450353    | 223.286475 | 0.21870339 | 0.27381656 | 0.79872227 | 0.42445147 | 0.70293777 |
| Gm8787      | 6.72304881 | 0.21866145 | 0.38948809 | 0.56140728 | 0.57451993 | 0.806724   |
| Adm2        | 149.340136 | 0.21863443 | 0.36413346 | 0.60042389 | 0.54822377 | 0.78882606 |
| Ufsp1       | 280.614447 | 0.21862573 | 0.27565885 | 0.79310253 | 0.42771809 | 0.70467677 |
| Ptgfr       | 1.27684121 | 0.21835348 | 0.25565877 | 0.85408174 | 0.3930597  | NA         |
| Trafd1      | 1265.8707  | 0.21831075 | 0.19536193 | 1.11746823 | 0.26379418 | 0.55548588 |
| Gtf3c5      | 2152.35313 | 0.218307   | 0.2267876  | 0.96260556 | 0.33574551 | 0.62836064 |
| Sh3rf1      | 1270.74843 | 0.21827102 | 0.23317076 | 0.93609942 | 0.349222   | 0.64162941 |
| Tdpoz3      | 7.43569891 | 0.21810998 | 0.36600853 | 0.59591501 | 0.55123201 | 0.7910861  |
| 6820408C15f | 18.1998448 | 0.21808133 | 0.43140804 | 0.50551058 | 0.61320027 | 0.82831257 |
| Rgl2        | 2789.54678 | 0.21800768 | 0.19957075 | 1.09238294 | 0.27466482 | 0.56715903 |
| Prkaca      | 5748.05257 | 0.21776821 | 0.17418096 | 1.25024119 | 0.21121145 | 0.4978306  |
| AW822252    | 7.71182982 | 0.21775948 | 0.39451889 | 0.55196211 | 0.58097432 | 0.80898385 |
| Sfmbt1      | 1624.47211 | 0.21766007 | 0.20610244 | 1.05607712 | 0.29093298 | 0.58476633 |
| Dio1        | 6.87672309 | 0.21765822 | 0.39260996 | 0.55438794 | 0.57931338 | 0.80819076 |
| Ccdc62      | 109.032389 | 0.217575   | 0.31178028 | 0.69784722 | 0.48527274 | 0.74769409 |
| Gm839       | 0.91144202 | 0.21745078 | 0.22282157 | 0.97589646 | 0.32911578 | NA         |
| Defb42      | 219.818628 | 0.21744331 | 0.42060661 | 0.51697551 | 0.60517326 | 0.82379634 |
| Gm805       | 96.3219124 | 0.21740109 | 0.31109569 | 0.69882385 | 0.48466212 | 0.74712338 |
| 5-Mar       | 8156.54123 | 0.21734031 | 0.14810847 | 1.4674401  | 0.14225637 | 0.40302949 |
| Actn4       | 25673.9113 | 0.21720386 | 0.21108039 | 1.02901015 | 0.3034749  | 0.59850576 |
| Ncdn        | 2168.87796 | 0.21719628 | 0.23919343 | 0.90803614 | 0.36385913 | 0.65400074 |
| Mettl7a1    | 498.231622 | 0.21719309 | 0.22819816 | 0.95177404 | 0.34121159 | 0.63465908 |
| Gm7444      | 2.40824265 | 0.21706921 | 0.326144   | 0.66556247 | 0.5056908  | NA         |
| 9430083A17f | 15.5864645 | 0.21706465 | 0.43220302 | 0.50222845 | 0.61550683 | 0.82965647 |
| Pawr        | 5615.5229  | 0.21703272 | 0.16340298 | 1.32820541 | 0.18411026 | 0.4644599  |
| Tigd2       | 2656.76224 | 0.21701982 | 0.17419503 | 1.24584389 | 0.21282171 | 0.49948543 |
| Mrps34      | 1911.57311 | 0.21698115 | 0.21665143 | 1.00152189 | 0.31657456 | 0.61108396 |
| Hsd11b1     | 0.9580089  | 0.21686018 | 0.22246614 | 0.97480083 | 0.32965906 | NA         |
| Lamp1       | 43440.9909 | 0.21685019 | 0.16485865 | 1.3153704  | 0.18838545 | 0.46953748 |
| Mknk2       | 5441.74389 | 0.21667075 | 0.17285965 | 1.25344891 | 0.21004238 | 0.49648412 |
| Orm1        | 1.9108065  | 0.21654019 | 0.24465493 | 0.8850841  | 0.37611128 | NA         |
| Rpp25       | 8881.608   | 0.21651621 | 0.21040052 | 1.0290669  | 0.30344824 | 0.59850576 |
| Nr3c2       | 86.9649438 | 0.21649529 | 0.38042187 | 0.56909265 | 0.56929327 | 0.80418512 |
| Klra7       | 1.27168376 | 0.21647647 | 0.26380787 | 0.8205838  | 0.41188338 | NA         |
| Adam22      | 1369.99619 | 0.21641305 | 0.27782351 | 0.77895875 | 0.43600402 | 0.7099789  |

|             |            |            |            |            |            |            |
|-------------|------------|------------|------------|------------|------------|------------|
| Nupl2       | 929.097043 | 0.21640036 | 0.18278864 | 1.18388298 | 0.23645939 | 0.52810283 |
| Pigp        | 1187.10981 | 0.21634066 | 0.25423973 | 0.85093177 | 0.39480725 | 0.68226374 |
| Ulk1        | 18430.9698 | 0.21623678 | 0.23077925 | 0.93698538 | 0.34876608 | 0.64094319 |
| Sgk2        | 132.38869  | 0.21596076 | 0.31967654 | 0.67556026 | 0.49931988 | 0.75708397 |
| Necab2      | 476.141251 | 0.21593797 | 0.35677479 | 0.60525008 | 0.54501285 | 0.78651585 |
| Kdelc2      | 1691.19382 | 0.21593019 | 0.28771223 | 0.75050751 | 0.4529491  | 0.72429938 |
| Zkscan16    | 83.4471069 | 0.21578384 | 0.35393435 | 0.60967194 | 0.54207915 | 0.78505055 |
| Stau1       | 4019.03993 | 0.21571441 | 0.17947142 | 1.20194295 | 0.22938563 | 0.52030092 |
| Epb4.1      | 6686.66861 | 0.21560676 | 0.17013904 | 1.26723859 | 0.20506999 | 0.4903111  |
| Rab21       | 2504.99148 | 0.21557344 | 0.20414704 | 1.05597144 | 0.29098126 | 0.58476633 |
| Ttc19       | 1578.77925 | 0.21550695 | 0.21330346 | 1.01033032 | 0.31233706 | 0.60676497 |
| Kirrel2     | 1195.34009 | 0.21548481 | 0.43227197 | 0.49849359 | 0.61813619 | 0.83039356 |
| Eny2        | 3745.56041 | 0.21543818 | 0.19878302 | 1.08378563 | 0.27845986 | 0.57075699 |
| Dnmt3b      | 5299.30935 | 0.21542739 | 0.31337254 | 0.68744821 | 0.49180033 | 0.75201444 |
| Nudt16l1    | 3633.35854 | 0.21537255 | 0.19064583 | 1.12969977 | 0.25860275 | 0.55112352 |
| Lrit3       | 2.74888721 | 0.21533312 | 0.26930503 | 0.79958819 | 0.42394943 | NA         |
| Sertad1     | 811.004359 | 0.21532919 | 0.21622241 | 0.99586898 | 0.31931381 | 0.61303091 |
| Slfn5       | 70.5062909 | 0.21513416 | 0.38606499 | 0.55724857 | 0.57735761 | 0.80734073 |
| Lnx2        | 1200.64137 | 0.21502459 | 0.23211267 | 0.92638023 | 0.35424842 | 0.6457528  |
| Efcab8      | 8.8380222  | 0.21497067 | 0.43097938 | 0.49879573 | 0.61792329 | 0.83032275 |
| Klk7        | 13.2374935 | 0.21494842 | 0.42966568 | 0.500269   | 0.61688568 | 0.83032065 |
| Nlrc5       | 29.6609369 | 0.21475369 | 0.41973938 | 0.51163579 | 0.60890593 | 0.82562526 |
| Snx14       | 3472.99549 | 0.21471244 | 0.16864214 | 1.27318379 | 0.20295283 | 0.48733798 |
| Txndc12     | 4788.4084  | 0.21468445 | 0.24718969 | 0.86850083 | 0.38512022 | 0.67428558 |
| Tuba3a      | 7702.88559 | 0.21463659 | 0.29658845 | 0.72368493 | 0.46925919 | 0.73704055 |
| Ube2u       | 1.73770861 | 0.21459651 | 0.28252221 | 0.75957396 | 0.44750929 | NA         |
| Lime1       | 1231.47014 | 0.21450303 | 0.16907861 | 1.26865864 | 0.20456284 | 0.4898609  |
| Soat1       | 1371.30661 | 0.21440617 | 0.23060064 | 0.92977264 | 0.35248882 | 0.64439796 |
| Lrrc57      | 2317.24414 | 0.21433108 | 0.17158824 | 1.24910122 | 0.21162806 | 0.49812885 |
| Osbp19      | 7218.15653 | 0.21430572 | 0.1600724  | 1.33880495 | 0.18063418 | 0.45932388 |
| Lpin2       | 1736.49967 | 0.21428337 | 0.25139491 | 0.85237753 | 0.39400459 | 0.68155343 |
| Kdm6b       | 4621.12663 | 0.21423236 | 0.21554833 | 0.99389478 | 0.3202741  | 0.61412854 |
| Marveld3    | 81.5555422 | 0.21421436 | 0.42165903 | 0.50802744 | 0.6114341  | 0.82681841 |
| 0610011F06F | 917.423164 | 0.2142112  | 0.25642855 | 0.83536409 | 0.40351274 | 0.68790031 |
| Vamp4       | 1213.6795  | 0.21414571 | 0.21403516 | 1.00051651 | 0.31706061 | 0.6115864  |
| Adck4       | 1416.74063 | 0.21404538 | 0.21998558 | 0.97299732 | 0.33055463 | 0.62369343 |
| Sorbs2      | 3.62502355 | 0.21388076 | 0.36255484 | 0.58992666 | 0.55523982 | NA         |
| Adc         | 810.61961  | 0.21382467 | 0.31396464 | 0.68104698 | 0.49584176 | 0.75559385 |
| Gabrd       | 6.24355346 | 0.21379528 | 0.41441615 | 0.51589515 | 0.60592764 | 0.82418428 |
| Ndufa8      | 2898.32292 | 0.21379215 | 0.17805433 | 1.20071297 | 0.22986256 | 0.52104783 |
| Fgf9        | 0.93654168 | 0.21376538 | 0.22108958 | 0.96687227 | 0.33360789 | NA         |



|             |            |            |            |            |            |            |
|-------------|------------|------------|------------|------------|------------|------------|
| Nrap        | 13.2980683 | 0.21370224 | 0.43013809 | 0.49682241 | 0.61931429 | 0.83094942 |
| Tmx1        | 6275.62823 | 0.21368821 | 0.1922816  | 1.1113295  | 0.26642655 | 0.55868408 |
| Tnfrsf13c   | 54.5794435 | 0.21367493 | 0.40950133 | 0.52179299 | 0.60181447 | 0.82174175 |
| Gm16863     | 1.66668478 | 0.21364014 | 0.27580493 | 0.77460594 | 0.43857255 | NA         |
| Fosl1       | 11.989393  | 0.2135084  | 0.42750633 | 0.49942747 | 0.61747827 | 0.83032065 |
| Golm1       | 12157.7766 | 0.21331752 | 0.20288312 | 1.0514306  | 0.29306087 | 0.58676317 |
| Cd79a       | 36.724869  | 0.21310347 | 0.39871973 | 0.53446935 | 0.59301685 | 0.81705522 |
| Rfxank      | 806.242425 | 0.21308556 | 0.22566573 | 0.94425305 | 0.34504035 | 0.63773152 |
| Lrrc32      | 4.82699167 | 0.2130656  | 0.35949691 | 0.59267713 | 0.55339725 | NA         |
| B230216G23I | 14.5480353 | 0.21299328 | 0.42683544 | 0.49900563 | 0.61777542 | 0.83032275 |
| Tes         | 3510.88772 | 0.21297268 | 0.2691628  | 0.79124114 | 0.42880329 | 0.7048133  |
| Isg20       | 26.8210864 | 0.21297119 | 0.39702825 | 0.53641319 | 0.59167302 | 0.81634852 |
| S1pr3       | 116.659932 | 0.21289644 | 0.39940537 | 0.5330335  | 0.59401039 | 0.81761864 |
| Klhl22      | 12375.1811 | 0.212871   | 0.27232784 | 0.78167183 | 0.43440746 | 0.70860901 |
| Cth         | 14528.7313 | 0.21280543 | 0.1608996  | 1.32259768 | 0.18596921 | 0.46656448 |
| Hdhd2       | 2071.54248 | 0.21268783 | 0.17920769 | 1.18682312 | 0.2352974  | 0.52717329 |
| Foxf1       | 7.58708697 | 0.2126652  | 0.37380391 | 0.56892183 | 0.56940919 | 0.80418512 |
| Ephb6       | 175.488507 | 0.21256029 | 0.30491002 | 0.69712466 | 0.48572478 | 0.74775368 |
| H2afy2      | 3505.58949 | 0.21252655 | 0.16501037 | 1.28795876 | 0.19776032 | 0.48093412 |
| Mill2       | 3.32633531 | 0.21250902 | 0.37721788 | 0.56335884 | 0.57319056 | NA         |
| Grhl1       | 378.331142 | 0.21242668 | 0.22261753 | 0.95422259 | 0.33997098 | 0.633415   |
| Tsen15      | 974.04665  | 0.21240552 | 0.17067512 | 1.24450197 | 0.21331488 | 0.5002449  |
| Coa7        | 2457.65244 | 0.21219515 | 0.18567602 | 1.14282475 | 0.25311136 | 0.54607863 |
| Tspyl1      | 4845.11551 | 0.21207959 | 0.17342376 | 1.22289811 | 0.22136818 | 0.5096956  |
| Alx4        | 1.77643205 | 0.21193818 | 0.24130624 | 0.87829548 | 0.37978339 | NA         |
| Gng8        | 12.9588269 | 0.21189347 | 0.42226622 | 0.50180066 | 0.61580775 | 0.82990514 |
| Kpna4       | 8830.25816 | 0.21186337 | 0.21625861 | 0.979676   | 0.32724608 | 0.62053453 |
| Mfap1a      | 1821.22606 | 0.21171246 | 0.18965255 | 1.11631748 | 0.26428626 | 0.5558447  |
| Birc2       | 5448.85257 | 0.21160123 | 0.16316596 | 1.29684667 | 0.19468395 | 0.4775284  |
| Rad54l2     | 7389.88811 | 0.21159412 | 0.23881833 | 0.88600451 | 0.3756151  | 0.6654252  |
| Angpt1      | 4.67930325 | 0.21148978 | 0.36758281 | 0.57535274 | 0.56505276 | NA         |
| Vamp5       | 32.8479568 | 0.21148087 | 0.42407324 | 0.4986895  | 0.61799814 | 0.83035157 |
| Asprv1      | 37.9386124 | 0.2114717  | 0.38201119 | 0.55357463 | 0.57986999 | 0.80831465 |
| Grhpr       | 3763.8374  | 0.2113872  | 0.18909602 | 1.11788288 | 0.26361702 | 0.55541671 |
| Fen1        | 8013.89217 | 0.21136414 | 0.15533429 | 1.36070497 | 0.17360694 | 0.45100512 |
| Fbxw13      | 4.88462834 | 0.21133184 | 0.40572098 | 0.52087974 | 0.60245055 | NA         |
| Fahd2a      | 640.784402 | 0.21109743 | 0.25574229 | 0.82543028 | 0.40912735 | 0.69268726 |
| Snx11       | 1609.14379 | 0.21107559 | 0.19991535 | 1.05582482 | 0.29104826 | 0.58476633 |
| B230217O12  | 41.824853  | 0.21107262 | 0.42281732 | 0.49920523 | 0.61763481 | 0.83032065 |
| Atp1b1      | 23376.6841 | 0.21105457 | 0.20824538 | 1.01348982 | 0.31082626 | 0.60549406 |
| 4930404N11I | 1.7672846  | 0.21101002 | 0.33082457 | 0.63783057 | 0.52358398 | NA         |

|             |            |            |            |            |            |            |
|-------------|------------|------------|------------|------------|------------|------------|
| Snord99     | 228.237952 | 0.21091812 | 0.26538014 | 0.79477733 | 0.42674304 | 0.70402942 |
| Gm4925      | 7.07632697 | 0.21075087 | 0.41929453 | 0.50263206 | 0.61522299 | 0.82953469 |
| Grin3b      | 4.23040475 | 0.21069277 | 0.36683093 | 0.57435933 | 0.56572467 | NA         |
| Lix1l       | 809.291871 | 0.21067915 | 0.20991779 | 1.00362694 | 0.31555847 | 0.60989929 |
| Cass4       | 15.6880522 | 0.21062351 | 0.43044321 | 0.48931776 | 0.62461675 | 0.83334035 |
| F420014N23f | 4.21785492 | 0.21062045 | 0.36758212 | 0.57298883 | 0.56665226 | NA         |
| Clstn3      | 1726.76167 | 0.21059426 | 0.21790114 | 0.96646699 | 0.33381056 | 0.62713382 |
| Ostf1       | 9885.55408 | 0.21039669 | 0.21089529 | 0.99763583 | 0.31845598 | 0.61238106 |
| Ubqln1      | 13375.9898 | 0.21033683 | 0.24789673 | 0.8484857  | 0.39616753 | 0.68293995 |
| Dnm3os      | 2.78100784 | 0.21027978 | 0.23143909 | 0.90857501 | NA         | NA         |
| Slc30a6     | 1557.79837 | 0.21005557 | 0.21523013 | 0.97595802 | 0.32908527 | 0.62234394 |
| Wbp1        | 1823.61676 | 0.20998281 | 0.22821167 | 0.920123   | 0.35750849 | 0.64865412 |
| Gm11545     | 275.527315 | 0.20994422 | 0.31798718 | 0.66022856 | 0.50910717 | 0.76389826 |
| Khdrbs1     | 11045.6118 | 0.20991056 | 0.21561612 | 0.97353835 | 0.33028581 | 0.62369343 |
| Pla2g7      | 44.8831217 | 0.20976763 | 0.42327609 | 0.49558109 | 0.62019    | 0.83138912 |
| Fam178b     | 1463.84359 | 0.20963768 | 0.21674004 | 0.96723097 | 0.33342859 | 0.62667971 |
| Snord57     | 70.5921526 | 0.20954319 | 0.36084571 | 0.58070025 | 0.56144249 | 0.79905798 |
| Eif2ak2     | 2896.54408 | 0.20944516 | 0.23817386 | 0.87937926 | 0.37919567 | 0.66834881 |
| Tmed2       | 1594.3211  | 0.20937612 | 0.2127535  | 0.98412542 | 0.32505385 | 0.6188465  |
| Tnfrsf21    | 3088.4532  | 0.20926556 | 0.2135435  | 0.97996688 | 0.32710247 | 0.62039456 |
| Jkamp       | 2949.2217  | 0.2092119  | 0.21239992 | 0.98499048 | 0.32462874 | 0.61877141 |
| Sufu        | 1747.69505 | 0.20908215 | 0.23470441 | 0.89083179 | 0.37301942 | 0.66287567 |
| Rab15       | 1439.00202 | 0.20890823 | 0.27223516 | 0.76738151 | 0.44285472 | 0.7165424  |
| Sohlh1      | 2.34036475 | 0.208807   | 0.31996918 | 0.65258473 | 0.51402403 | NA         |
| Foxj3       | 3890.59637 | 0.20880304 | 0.20714856 | 1.00798693 | 0.31346074 | 0.60787966 |
| Wdr7        | 1825.18025 | 0.20875822 | 0.23595093 | 0.8847527  | 0.37629002 | 0.66625141 |
| Snord11     | 5.66533493 | 0.20823392 | 0.41713877 | 0.49919579 | 0.61764146 | NA         |
| Zbtb42      | 64.1084591 | 0.20819962 | 0.34690875 | 0.60015672 | 0.5484018  | 0.78891733 |
| Coa4        | 824.253657 | 0.20814602 | 0.23514138 | 0.8851952  | 0.37605136 | 0.66590466 |
| 6430573F11F | 63.9016559 | 0.20814064 | 0.34101066 | 0.61036405 | 0.54162068 | 0.78492088 |
| Lipg        | 187.552866 | 0.20810516 | 0.34692749 | 0.59985204 | 0.54860485 | 0.78906345 |
| Gm13375     | 127.352785 | 0.20805986 | 0.3465501  | 0.60037456 | 0.54825664 | 0.78882606 |
| 4921531P14F | 0.89889219 | 0.20805643 | 0.21851149 | 0.95215326 | 0.34101926 | NA         |
| Urad        | 0.89889219 | 0.20805643 | 0.21851149 | 0.95215326 | 0.34101926 | NA         |
| Ttll2       | 1.90080837 | 0.20800544 | 0.30544388 | 0.68099395 | 0.49587532 | NA         |
| Snx5        | 40617.6419 | 0.20797654 | 0.15274547 | 1.36158888 | 0.17332767 | 0.45071973 |
| Dalrd3      | 2396.13467 | 0.20769085 | 0.20958943 | 0.99094144 | 0.32171418 | 0.61597847 |
| Psd3        | 90.2414159 | 0.20764943 | 0.33526263 | 0.61936347 | 0.53567694 | 0.7803571  |
| Zfp35       | 4101.58109 | 0.20764736 | 0.17643448 | 1.1769092  | 0.23923175 | 0.53124274 |
| Slc35b4     | 1952.33841 | 0.20763682 | 0.21112542 | 0.9834762  | 0.32537313 | 0.61902113 |
| Prep        | 12404.1053 | 0.20754934 | 0.24150936 | 0.85938423 | 0.39012857 | 0.67839532 |

|             |            |            |            |            |            |            |
|-------------|------------|------------|------------|------------|------------|------------|
| Pigl        | 3484.49391 | 0.20754402 | 0.21710625 | 0.95595599 | 0.33909447 | 0.63270101 |
| Bace1       | 1078.77343 | 0.20733475 | 0.26989386 | 0.76820847 | 0.44236334 | 0.7159317  |
| Tmeff2      | 10.0708231 | 0.2073259  | 0.43131003 | 0.4806888  | 0.63073769 | 0.8371257  |
| 4930455B14F | 12.2554327 | 0.20731392 | 0.42118017 | 0.49222146 | 0.6225628  | 0.83247791 |
| B930092H01I | 26.6844342 | 0.20705492 | 0.41741338 | 0.49604285 | 0.61986418 | 0.83138912 |
| 3830408C21F | 45.1223719 | 0.20690826 | 0.37342973 | 0.5540755  | 0.57952718 | 0.80819901 |
| 1810013L24F | 4282.10394 | 0.20690755 | 0.16793471 | 1.23207144 | 0.2179224  | 0.50588315 |
| Ushbp1      | 603.357314 | 0.20686097 | 0.26644882 | 0.77636287 | 0.43753476 | 0.7115571  |
| Pld5        | 1.37877746 | 0.20672015 | 0.21721756 | 0.95167327 | 0.34126271 | NA         |
| Mab21l1     | 1.37877746 | 0.20672015 | 0.21721756 | 0.95167327 | 0.34126271 | NA         |
| Tpgs1       | 1246.40375 | 0.20665761 | 0.24627925 | 0.83911907 | 0.4014025  | 0.68648523 |
| Ccnyl1      | 1229.61604 | 0.20662567 | 0.1702934  | 1.21335104 | 0.22499564 | 0.51439387 |
| Mir6990     | 4.47285326 | 0.20657261 | 0.38834741 | 0.53192735 | 0.59477632 | NA         |
| Atp6v0e2    | 760.675211 | 0.20651029 | 0.18142809 | 1.13824875 | 0.25501663 | 0.54797381 |
| Arfgef2     | 7093.78239 | 0.20640643 | 0.22165266 | 0.93121564 | 0.35174203 | 0.64397696 |
| Habp2       | 3.64381814 | 0.20640543 | 0.36913639 | 0.55915765 | 0.57605414 | NA         |
| Cox8b       | 11.8859201 | 0.20635027 | 0.38758037 | 0.53240641 | 0.59444454 | 0.81778194 |
| Fam214b     | 824.125944 | 0.20609422 | 0.21585695 | 0.95477223 | 0.3396929  | 0.63313658 |
| Myl12b      | 11311.2274 | 0.20604898 | 0.17670285 | 1.16607613 | 0.24358367 | 0.5357807  |
| Trim25      | 16068.0776 | 0.20604107 | 0.20014279 | 1.02947033 | 0.30325871 | 0.59849162 |
| Sost        | 1.25913393 | 0.20597706 | 0.25869806 | 0.79620646 | 0.42591204 | NA         |
| Mme         | 11181.9075 | 0.2058842  | 0.20977912 | 0.98143324 | 0.32637914 | 0.61957682 |
| Pex13       | 4837.21709 | 0.20587789 | 0.16513833 | 1.24669961 | 0.21250766 | 0.49916693 |
| Tyw3        | 1056.49005 | 0.20586003 | 0.21742778 | 0.94679728 | 0.34374209 | 0.63705556 |
| Hepacam2    | 2.90824616 | 0.20583745 | 0.36728728 | 0.56042629 | 0.5751887  | NA         |
| Stac3       | 25.3937331 | 0.20583679 | 0.4139971  | 0.4971938  | 0.6190524  | 0.83090659 |
| Gm13710     | 1.89679855 | 0.20582167 | 0.30897901 | 0.6661348  | 0.50532495 | NA         |
| Zfp105      | 1482.83949 | 0.20576004 | 0.16089493 | 1.27884727 | 0.20095085 | 0.4847195  |
| Smim15      | 4811.69186 | 0.205703   | 0.18147317 | 1.13351741 | 0.25699704 | 0.54996022 |
| Fibcd1      | 4.39187038 | 0.20562451 | 0.3882386  | 0.52963437 | 0.59636546 | NA         |
| Soat2       | 260.942489 | 0.20559504 | 0.28842627 | 0.71281664 | 0.47595923 | 0.74134156 |
| Pax9        | 16.6401999 | 0.20540067 | 0.43224391 | 0.47519622 | 0.63464712 | 0.83934241 |
| Gmnc        | 10.243205  | 0.20536238 | 0.32660203 | 0.62878478 | 0.52948996 | 0.77650872 |
| Ell3        | 1414.23656 | 0.20533226 | 0.27483347 | 0.74711519 | 0.45499403 | 0.72548059 |
| Mob3c       | 880.253772 | 0.20532558 | 0.25850811 | 0.79427135 | 0.42703748 | 0.70407759 |
| Itga2b      | 60.8186115 | 0.20511356 | 0.34561505 | 0.59347403 | 0.55286395 | 0.79208943 |
| Lpcat4      | 774.120653 | 0.20510807 | 0.18158511 | 1.12954233 | 0.25866913 | 0.55112352 |
| Neur12      | 142.65097  | 0.20492761 | 0.30602264 | 0.66964852 | 0.50308188 | 0.75940849 |
| Slc4a3      | 175.559855 | 0.2049167  | 0.28197342 | 0.72672347 | 0.46739537 | 0.73589809 |
| Chmp4b      | 7572.39857 | 0.20490884 | 0.17192621 | 1.19184178 | 0.23332329 | 0.52494365 |
| Ankrd39     | 433.513858 | 0.204863   | 0.20187886 | 1.01478184 | 0.31020983 | 0.60486516 |

|             |            |            |            |            |            |            |
|-------------|------------|------------|------------|------------|------------|------------|
| Scamp3      | 4422.65266 | 0.20477175 | 0.18093109 | 1.1317665  | 0.25773262 | 0.5502471  |
| Rap2c       | 3175.26338 | 0.20470292 | 0.15706576 | 1.30329436 | 0.19247429 | 0.4751814  |
| Terf2       | 3690.49534 | 0.20436226 | 0.16323939 | 1.25191759 | 0.2105999  | 0.49749947 |
| 9330162012F | 7.34384103 | 0.20434713 | 0.41758457 | 0.48935507 | 0.62459034 | 0.83334035 |
| 4921539E11F | 3.7616107  | 0.20432965 | 0.38795285 | 0.52668682 | 0.59841109 | NA         |
| Slc9a3r1    | 5659.67388 | 0.20407851 | 0.25976057 | 0.78564083 | 0.43207794 | 0.70751227 |
| Selk        | 1688.59509 | 0.20395929 | 0.18385321 | 1.10935938 | 0.26727518 | 0.55978401 |
| Mturn       | 740.011167 | 0.20394642 | 0.33420396 | 0.61024539 | 0.54169926 | 0.78493899 |
| Endog       | 923.396076 | 0.20390388 | 0.23209889 | 0.87852157 | 0.37966074 | 0.66879294 |
| Gm12657     | 3.74190513 | 0.20389721 | 0.38928025 | 0.52378    | 0.60043157 | NA         |
| Vsx1        | 28.686157  | 0.20387707 | 0.42691108 | 0.47756332 | 0.63296104 | 0.83857582 |
| Gdap2       | 1297.66293 | 0.20384806 | 0.16126455 | 1.26405996 | 0.20620851 | 0.49102568 |
| Aanat       | 1.73594695 | 0.20383444 | 0.27650768 | 0.73717462 | 0.46101617 | NA         |
| Maged2      | 1925.33769 | 0.20381288 | 0.20235261 | 1.00721643 | 0.31383078 | 0.60837477 |
| Timp1       | 2798.29682 | 0.20373308 | 0.24463592 | 0.83280116 | 0.40495688 | 0.68916712 |
| Ehmt2       | 8506.13087 | 0.20368302 | 0.21734743 | 0.93713104 | 0.34869116 | 0.64088124 |
| Smdt1       | 3208.48291 | 0.20364164 | 0.18331005 | 1.11091365 | 0.26660552 | 0.55898374 |
| Egfr        | 233.6843   | 0.2036297  | 0.27874861 | 0.73051377 | 0.4650762  | 0.73410475 |
| Sardh       | 3.5295141  | 0.20359614 | 0.35845125 | 0.56798836 | 0.57004287 | NA         |
| Fastkd5     | 1939.91937 | 0.20358531 | 0.17737827 | 1.14774662 | 0.25107318 | 0.54460318 |
| Pet100      | 1765.92085 | 0.20348674 | 0.25937095 | 0.78453944 | 0.43272365 | 0.70789874 |
| Mir7089     | 1.56165646 | 0.20346676 | 0.27574473 | 0.73788085 | 0.46058686 | NA         |
| Acaca       | 3019.69209 | 0.20335435 | 0.24097578 | 0.8438788  | 0.39873714 | 0.68457103 |
| Nudt18      | 334.017737 | 0.20335232 | 0.25615967 | 0.79384987 | 0.42728284 | 0.70423083 |
| Tmem120a    | 2288.38203 | 0.2032197  | 0.20558184 | 0.98851001 | 0.32290294 | 0.61736896 |
| Trmt2a      | 3809.95628 | 0.20318851 | 0.17684167 | 1.14898545 | 0.25056198 | 0.54405045 |
| Tmco4       | 867.838167 | 0.20313505 | 0.18139372 | 1.11985715 | 0.26277464 | 0.55510278 |
| Mettl7a3    | 8.22641388 | 0.20307033 | 0.42800325 | 0.47445978 | 0.63517207 | 0.83950033 |
| Sec22a      | 1817.82055 | 0.20294284 | 0.18226143 | 1.11347114 | 0.26550614 | 0.55746658 |
| Zc3h3       | 356.607855 | 0.20290204 | 0.25362766 | 0.79999963 | 0.42371101 | 0.70246588 |
| Tln1        | 11332.0015 | 0.20286593 | 0.2693346  | 0.75321154 | 0.45132281 | 0.72318609 |
| Frmpt1      | 35.7045885 | 0.20286316 | 0.43058001 | 0.47113929 | 0.63754127 | 0.84125743 |
| Igf2bp1     | 24415.3736 | 0.2025378  | 0.24571294 | 0.82428624 | 0.40977693 | 0.69288258 |
| Rab12       | 3258.6175  | 0.20253427 | 0.16974673 | 1.19315567 | 0.23280841 | 0.52452319 |
| Gpr52       | 1.72515878 | 0.20252596 | 0.27623731 | 0.73315932 | 0.46346127 | NA         |
| Pbx2        | 2936.9453  | 0.20232154 | 0.1947988  | 1.03861798 | 0.29898244 | 0.59367833 |
| Ctf1        | 242.774266 | 0.20229453 | 0.3330935  | 0.60732054 | 0.54363821 | 0.78606395 |
| Tbcb        | 4493.27958 | 0.20224518 | 0.20593684 | 0.98207383 | 0.32606348 | 0.61942501 |
| Fam96a      | 4618.41215 | 0.20223651 | 0.20186961 | 1.00181751 | 0.31643174 | 0.6110555  |
| Idh1        | 20903.7074 | 0.2022001  | 0.15876271 | 1.2735994  | 0.20280542 | 0.48733798 |
| Nkrf        | 1494.81218 | 0.20219457 | 0.24262611 | 0.83335866 | 0.40464248 | 0.68911875 |

|             |            |            |            |            |            |            |
|-------------|------------|------------|------------|------------|------------|------------|
| Vps29       | 5382.33602 | 0.2021876  | 0.17727931 | 1.14050313 | 0.25407675 | 0.54723498 |
| Tbxa2r      | 38.6977767 | 0.20215915 | 0.37638847 | 0.53710238 | 0.59119689 | 0.81611679 |
| Ghitm       | 27123.4834 | 0.20215543 | 0.20656317 | 0.97866153 | 0.32774724 | 0.62118189 |
| Zbtb24      | 1714.6986  | 0.2020937  | 0.15539135 | 1.30054666 | 0.19341367 | 0.47612768 |
| 1600025M17  | 1.9391994  | 0.20207932 | 0.31474076 | 0.64205003 | 0.5208407  | NA         |
| Rpp14       | 3101.69795 | 0.20194806 | 0.22108146 | 0.91345545 | 0.36100305 | 0.65183221 |
| Clpp        | 4920.98863 | 0.20187628 | 0.19342974 | 1.04366721 | 0.29663939 | 0.59122008 |
| Atf2        | 5823.70027 | 0.20181953 | 0.18688316 | 1.07992356 | 0.28017622 | 0.57238012 |
| Crb1        | 1.43390416 | 0.20173468 | 0.28917716 | 0.69761621 | 0.48541724 | NA         |
| Arhgef10    | 352.567565 | 0.20171253 | 0.28407554 | 0.71006651 | 0.47766289 | 0.7424775  |
| Trp63       | 17.3841985 | 0.20147314 | 0.4236862  | 0.47552442 | 0.63441323 | 0.83928202 |
| Wdr44       | 960.036104 | 0.20133945 | 0.23284983 | 0.86467512 | 0.38721713 | 0.67614702 |
| Slc35e3     | 789.358242 | 0.20131933 | 0.21541688 | 0.93455569 | 0.3500167  | 0.64198366 |
| Pear1       | 27.8114069 | 0.20130439 | 0.39649035 | 0.50771574 | 0.61165271 | 0.82704211 |
| Olf94       | 2.33265561 | 0.20130255 | 0.2602287  | 0.77356016 | 0.43919094 | NA         |
| Crtc1       | 645.335645 | 0.2012601  | 0.25212546 | 0.79825378 | 0.42472324 | 0.70307615 |
| Ssr2        | 20885.1844 | 0.20114538 | 0.20359547 | 0.98796589 | 0.32316935 | 0.61777586 |
| Neu1        | 1943.43724 | 0.20108402 | 0.27937748 | 0.71975743 | 0.47167436 | 0.73859646 |
| Exog        | 814.442975 | 0.2009493  | 0.23839464 | 0.8429271  | 0.39926922 | 0.68479492 |
| Unc5c       | 17.1640993 | 0.20086682 | 0.42194846 | 0.47604588 | 0.6340417  | 0.83926065 |
| Gm13483     | 1.54195089 | 0.2008322  | 0.2751591  | 0.72987664 | 0.46546559 | NA         |
| Al854517    | 114.710415 | 0.20079866 | 0.42369747 | 0.4739199  | 0.63555703 | 0.83965231 |
| Slc35b3     | 588.124075 | 0.20079424 | 0.24694112 | 0.81312598 | 0.41614583 | 0.6982611  |
| Cd28        | 1.47014958 | 0.20075115 | 0.21435042 | 0.9365559  | 0.34898705 | NA         |
| Hdhd3       | 96.8803193 | 0.2007354  | 0.34886968 | 0.57538794 | 0.56502896 | 0.80125038 |
| Slc25a25    | 1622.49405 | 0.20070743 | 0.18244816 | 1.10007921 | 0.27129761 | 0.56486131 |
| Gm10560     | 50.4870526 | 0.20068482 | 0.36584253 | 0.54855519 | 0.58331074 | 0.81071278 |
| Cacna1a     | 3342.60198 | 0.20066471 | 0.20930296 | 0.95872849 | 0.33769554 | 0.6309628  |
| Pparg       | 1.81784149 | 0.20065374 | 0.24085584 | 0.83308647 | 0.40479596 | NA         |
| Acvr1b      | 2375.13333 | 0.20062684 | 0.23115901 | 0.86791702 | 0.38543976 | 0.67454127 |
| Rhoq        | 1239.27667 | 0.20059538 | 0.34904591 | 0.57469627 | 0.56549673 | 0.80155685 |
| Pitx3       | 28.2416608 | 0.20055178 | 0.42770242 | 0.46890496 | 0.63913757 | 0.84223427 |
| Lym4        | 750.739066 | 0.20053472 | 0.24487755 | 0.81891836 | 0.41283299 | 0.69515344 |
| Ctxn1       | 296.161869 | 0.20051645 | 0.24906637 | 0.80507236 | 0.42077793 | 0.70091929 |
| Cers6       | 1807.53913 | 0.200469   | 0.26217506 | 0.76463794 | 0.44448717 | 0.71785439 |
| Coro7       | 1641.28479 | 0.20044095 | 0.20042769 | 1.00006617 | 0.31727849 | 0.61159656 |
| 1700030J22R | 276.893068 | 0.20030981 | 0.27130776 | 0.73831214 | 0.46032479 | 0.73086774 |
| Ffar1       | 1.22010018 | 0.20029659 | 0.25271787 | 0.79256992 | 0.42802844 | NA         |
| Smco2       | 3.15659501 | 0.20023499 | 0.33144803 | 0.60412182 | 0.54576265 | NA         |
| Tcf12       | 4717.21915 | 0.20013766 | 0.24829563 | 0.80604584 | 0.42021642 | 0.70048081 |
| 4933424G06I | 3.48896789 | 0.20011896 | 0.37530567 | 0.53321592 | 0.59388412 | NA         |

|             |            |            |            |            |            |            |
|-------------|------------|------------|------------|------------|------------|------------|
| Vgll4       | 380.865522 | 0.19998452 | 0.29451206 | 0.67903679 | 0.49711455 | 0.75614418 |
| Atrnl1      | 924.070489 | 0.19996501 | 0.22314781 | 0.89611013 | 0.37019394 | 0.66042056 |
| Slc35e2     | 2315.07322 | 0.19992817 | 0.19309684 | 1.03537774 | 0.30049254 | 0.59541367 |
| 9430060I03R | 6.28110996 | 0.19980216 | 0.38921508 | 0.5133464  | 0.60770903 | 0.82522557 |
| Gak         | 7303.06195 | 0.19972212 | 0.18050254 | 1.10647817 | 0.26851961 | 0.56133195 |
| Wasf1       | 2368.71384 | 0.19969952 | 0.22866857 | 0.87331423 | 0.38249182 | 0.67137416 |
| 4930526L06F | 151.557555 | 0.19969385 | 0.32331256 | 0.61764954 | 0.53680638 | 0.78097821 |
| Resp18      | 1.45759975 | 0.19967693 | 0.21385072 | 0.93372113 | 0.35044776 | NA         |
| Pcdhgb4     | 15.1061415 | 0.19952612 | 0.42166003 | 0.47319192 | 0.63607626 | 0.84003761 |
| Higd1a      | 2739.44969 | 0.19937291 | 0.24063421 | 0.82853104 | 0.40736983 | 0.69121748 |
| Plekha3     | 3241.54306 | 0.19928753 | 0.18504478 | 1.07696924 | 0.28149401 | 0.5737239  |
| Reln        | 10.927512  | 0.19924004 | 0.42596243 | 0.46774088 | 0.6399699  | 0.84254757 |
| Slc35a4     | 2694.17618 | 0.19922526 | 0.24756822 | 0.80472873 | 0.42097624 | 0.70091929 |
| Phldb3      | 210.308018 | 0.19915543 | 0.29293081 | 0.67987192 | 0.49658556 | 0.75601768 |
| 2610027K06F | 1.51375917 | 0.1991388  | 0.23918134 | 0.83258499 | 0.40507883 | NA         |
| Cd79b       | 297.560833 | 0.19909709 | 0.31814125 | 0.62581352 | 0.53143726 | 0.7782358  |
| Pdcd2       | 3733.25189 | 0.19907357 | 0.18810898 | 1.05828852 | 0.28992392 | 0.58341187 |
| D10Jhu81e   | 1745.46245 | 0.1990656  | 0.20871914 | 0.95374864 | 0.34021089 | 0.6336027  |
| Whrn        | 579.2894   | 0.19898726 | 0.23796584 | 0.83620093 | 0.40304188 | 0.68747441 |
| Rabl3       | 1907.09262 | 0.1989167  | 0.15480215 | 1.28497375 | 0.19880146 | 0.48195956 |
| Nptx2       | 2519.34371 | 0.19846342 | 0.30095678 | 0.6594416  | 0.50961223 | 0.76413825 |
| Slc25a16    | 1929.37386 | 0.19842743 | 0.19851189 | 0.99957453 | 0.31751646 | 0.61159656 |
| Il1rl1      | 2.62632056 | 0.19837239 | 0.21273057 | 0.9325053  | NA         | NA         |
| Cdc73       | 4482.5198  | 0.19836368 | 0.20571698 | 0.96425529 | 0.33491795 | 0.62796106 |
| Cnga3       | 386.23221  | 0.19835586 | 0.355615   | 0.55778261 | 0.57699284 | 0.80734073 |
| Mmp15       | 745.768383 | 0.1982603  | 0.3766799  | 0.52633629 | 0.59865457 | 0.82005546 |
| Fam117b     | 4090.10313 | 0.19821454 | 0.21961552 | 0.90255251 | 0.36676344 | 0.65694132 |
| Tada2b      | 1048.82335 | 0.19817273 | 0.22692781 | 0.87328535 | 0.38250756 | 0.67137416 |
| Srp54a      | 238.378398 | 0.19815986 | 0.25187727 | 0.78673181 | 0.43143888 | 0.70688509 |
| Mrps36      | 476.109768 | 0.1979524  | 0.23086992 | 0.85741963 | 0.39121301 | 0.67929361 |
| Erich2      | 11.4966987 | 0.19782926 | 0.43166548 | 0.45829299 | 0.64674196 | 0.84723143 |
| Senp7       | 555.475579 | 0.19777732 | 0.21792105 | 0.90756409 | 0.36410858 | 0.65406636 |
| Proser2     | 207.409323 | 0.19766281 | 0.38369191 | 0.51516022 | 0.60644106 | 0.82429551 |
| Cd55        | 2560.75304 | 0.19764183 | 0.22313584 | 0.88574669 | 0.37575404 | 0.66545395 |
| Mir453      | 1.76552294 | 0.1975964  | 0.32256208 | 0.61258411 | 0.54015137 | NA         |
| Psme1       | 4608.21295 | 0.19753124 | 0.27961148 | 0.70644897 | 0.47990898 | 0.74398871 |
| Dusp23      | 13.8784309 | 0.19736955 | 0.4322641  | 0.45659482 | 0.64796231 | 0.84807194 |
| Gm16523     | 2.70373695 | 0.19731638 | 0.33145211 | 0.59530889 | 0.55163702 | NA         |
| BC030867    | 2898.99705 | 0.1972685  | 0.16737846 | 1.17857757 | 0.23856643 | 0.53071461 |
| Htati2      | 1976.742   | 0.19715903 | 0.22452939 | 0.87809899 | 0.37989    | 0.66890318 |
| a           | 25.0643525 | 0.19692552 | 0.42798876 | 0.46011844 | 0.64543121 | 0.84629525 |

|             |            |            |            |            |            |            |
|-------------|------------|------------|------------|------------|------------|------------|
| Tmem63b     | 3808.53278 | 0.1968326  | 0.17591827 | 1.11888661 | 0.26318852 | 0.5553611  |
| Tex11       | 778.034407 | 0.19667209 | 0.23789651 | 0.82671279 | 0.40839987 | 0.69198369 |
| Gm6432      | 49.360314  | 0.1965928  | 0.4061708  | 0.48401509 | 0.62837516 | 0.83570189 |
| 2210039B01F | 4.9880232  | 0.1965193  | 0.36989758 | 0.53128032 | 0.59522454 | NA         |
| Obfc1       | 1532.62494 | 0.19646199 | 0.272279   | 0.72154661 | 0.47057327 | 0.73806203 |
| S100a4      | 2.3122947  | 0.19645164 | 0.28718397 | 0.684062   | 0.49393602 | NA         |
| Coa6        | 1154.82103 | 0.19638971 | 0.19150122 | 1.0255272  | 0.3051145  | 0.59970116 |
| Lamtor2     | 3555.50856 | 0.19630408 | 0.24301926 | 0.80777172 | 0.41922201 | 0.69987348 |
| Rexo2       | 3365.45117 | 0.19630212 | 0.17949365 | 1.09364377 | 0.27411124 | 0.56692432 |
| Ppp1r37     | 2196.58501 | 0.19614371 | 0.21932725 | 0.89429703 | 0.37116299 | 0.66146638 |
| Cyp26a1     | 20.5802681 | 0.19605889 | 0.41457067 | 0.4729203  | 0.63627004 | 0.84016603 |
| Ptpn23      | 4047.94562 | 0.19603482 | 0.21741825 | 0.90164842 | 0.36724366 | 0.65733265 |
| Polr3d      | 2624.58252 | 0.19603338 | 0.2176664  | 0.9006139  | 0.36779364 | 0.65810136 |
| Arpc5       | 7188.49721 | 0.19593587 | 0.17315107 | 1.13158913 | 0.25780721 | 0.55025528 |
| Wipi2       | 6476.57548 | 0.19589281 | 0.15611748 | 1.25477824 | 0.20955927 | 0.49577373 |
| Upf3b       | 4900.98642 | 0.19587319 | 0.17031007 | 1.15009755 | 0.2501037  | 0.54373865 |
| Mctp1       | 3.48584103 | 0.19585986 | 0.34508093 | 0.5675766  | 0.5703225  | NA         |
| Cav2        | 1.45360973 | 0.19577239 | 0.28420508 | 0.68884197 | 0.49092272 | NA         |
| Gm10653     | 10.8636734 | 0.19576888 | 0.43207499 | 0.45309005 | 0.6504839  | 0.84904399 |
| Dok5        | 1.45147069 | 0.1956744  | 0.28935917 | 0.67623363 | 0.49889232 | NA         |
| Eif2d       | 9517.30733 | 0.19567424 | 0.19026197 | 1.02844644 | 0.30373987 | 0.5985887  |
| Fa2h        | 4.25073982 | 0.19557122 | 0.36629732 | 0.53391387 | 0.59340113 | NA         |
| Nprl3       | 1317.10228 | 0.19545857 | 0.19261229 | 1.01477725 | 0.31021202 | 0.60486516 |
| Pdgfra      | 100.198773 | 0.19543224 | 0.34177001 | 0.57182383 | 0.56744133 | 0.8030103  |
| Cyp1a2      | 11.1429318 | 0.19532845 | 0.41325468 | 0.47265877 | 0.63645665 | 0.84034109 |
| Cul4b       | 30245.3064 | 0.19520833 | 0.23680928 | 0.82432719 | 0.40975367 | 0.69288258 |
| Phf1        | 677.746506 | 0.19501287 | 0.21434739 | 0.90979821 | 0.36292894 | 0.65337545 |
| Narf        | 1595.90712 | 0.19498328 | 0.26991242 | 0.72239461 | 0.4700519  | 0.7376907  |
| Cdkn2a      | 2324.18179 | 0.19495843 | 0.26884759 | 0.72516338 | 0.46835181 | 0.73621136 |
| Uhrf1bp1    | 5200.78634 | 0.19493437 | 0.19504109 | 0.99945286 | 0.31757536 | 0.61159656 |
| Sccpdh      | 3031.0065  | 0.19481294 | 0.25622584 | 0.76031729 | 0.44706495 | 0.72037167 |
| Dusp12      | 2800.596   | 0.19469548 | 0.18738613 | 1.03900688 | 0.29880154 | 0.59351931 |
| Wfdc3       | 1.40035382 | 0.19468465 | 0.21150296 | 0.92048188 | 0.357321   | NA         |
| Rap2b       | 1991.63116 | 0.19462341 | 0.16773322 | 1.16031529 | 0.24592046 | 0.53908837 |
| A430089I19R | 3.32226506 | 0.19456989 | 0.31030162 | 0.62703472 | 0.53063648 | NA         |
| Itgb4       | 1036.22804 | 0.19446192 | 0.24953702 | 0.77929087 | 0.43580839 | 0.70987111 |
| Alox5       | 32.7075701 | 0.19442273 | 0.41986302 | 0.46306228 | 0.64331972 | 0.84490346 |
| Cldn7       | 622.60217  | 0.19441674 | 0.4090409  | 0.47529903 | 0.63457385 | 0.83934241 |
| Man1a       | 167.418682 | 0.19440071 | 0.41304256 | 0.47065539 | 0.63788684 | 0.84137221 |
| Zmym3       | 4213.34868 | 0.19411422 | 0.21316497 | 0.91062907 | 0.36249085 | 0.653349   |
| Il17b       | 27.3050304 | 0.1941053  | 0.42492088 | 0.45680339 | 0.64781237 | 0.84806214 |

|             |            |            |            |            |            |            |
|-------------|------------|------------|------------|------------|------------|------------|
| Dbi         | 10450.2661 | 0.19409442 | 0.21045699 | 0.92225219 | 0.35639705 | 0.64764337 |
| Cbx4        | 755.038586 | 0.19407972 | 0.20292745 | 0.95639954 | 0.33887042 | 0.63247406 |
| Klhdc8a     | 22.8624679 | 0.19404045 | 0.430056   | 0.45119811 | 0.65184677 | 0.84981368 |
| Aph1c       | 146.512442 | 0.19403298 | 0.3339826  | 0.58096734 | 0.56126246 | 0.79905798 |
| Inpp1       | 144.480879 | 0.19392551 | 0.3102889  | 0.62498373 | 0.53198174 | 0.77840121 |
| Mapk14      | 7663.54083 | 0.19381388 | 0.18991786 | 1.02051426 | 0.30748463 | 0.60207674 |
| Gm6083      | 260.327481 | 0.1937136  | 0.33538074 | 0.57759309 | 0.56353887 | 0.80003409 |
| Aldh9a1     | 6078.25635 | 0.19371141 | 0.20899917 | 0.92685253 | 0.35400311 | 0.64545695 |
| Tmem177     | 1108.55166 | 0.19368875 | 0.17524556 | 1.10524198 | 0.26905475 | 0.56207287 |
| Syde1       | 342.492611 | 0.19358163 | 0.23778271 | 0.81411144 | 0.41558111 | 0.69777304 |
| Snap47      | 3519.67737 | 0.19353674 | 0.17769392 | 1.08915794 | 0.27608424 | 0.5685851  |
| Dym         | 3276.55874 | 0.19352916 | 0.15595182 | 1.2409548  | 0.21462245 | 0.50166747 |
| Mrpl36      | 3225.14211 | 0.19346179 | 0.19811974 | 0.97648922 | 0.32882209 | 0.62222868 |
| E130012A19f | 10296.8716 | 0.19340481 | 0.21410423 | 0.90332085 | 0.36635563 | 0.65673734 |
| Gm14634     | 4.7990277  | 0.19334678 | 0.39867763 | 0.48497023 | 0.62769746 | NA         |
| Vav2        | 1170.66169 | 0.19334629 | 0.20805389 | 0.92930869 | 0.35272913 | 0.64439796 |
| Bola1       | 877.541359 | 0.1932911  | 0.23111113 | 0.83635567 | 0.40295484 | 0.68740218 |
| Hmx3        | 1.85023167 | 0.19326373 | 0.30433188 | 0.63504265 | 0.5254006  | NA         |
| E230019M04  | 3.74053632 | 0.19313659 | 0.38635626 | 0.49989247 | 0.61715079 | NA         |
| Smim12      | 1764.45282 | 0.19306667 | 0.21302449 | 0.9063121  | 0.36477069 | 0.6548307  |
| Arhgap25    | 13.2705484 | 0.19305305 | 0.43080167 | 0.44812513 | 0.65406289 | 0.85168012 |
| Tmem208     | 1679.49948 | 0.19291087 | 0.20438213 | 0.94387349 | 0.3452343  | 0.63779826 |
| Tmprss11d   | 45.0055682 | 0.19290538 | 0.43187129 | 0.44667332 | 0.65511095 | 0.85234189 |
| Mir330      | 1.44845229 | 0.19284775 | 0.29405181 | 0.65582917 | 0.51193404 | NA         |
| Lrp2        | 792.498358 | 0.19284749 | 0.36473054 | 0.52873963 | 0.59698608 | 0.81955304 |
| Mrpl44      | 2529.52714 | 0.19262184 | 0.17072387 | 1.1282654  | 0.25920785 | 0.55135294 |
| Prnp        | 1241.80777 | 0.19250918 | 0.3412841  | 0.56407309 | 0.57270439 | 0.80615492 |
| Msc         | 414.778256 | 0.19249893 | 0.41470671 | 0.46418088 | 0.64251816 | 0.84425594 |
| Ten1        | 769.84114  | 0.19245099 | 0.2369245  | 0.81228828 | 0.41662624 | 0.69846427 |
| Itgb1bp1    | 1596.19423 | 0.19227197 | 0.21601585 | 0.89008269 | 0.37342149 | 0.66321123 |
| Pde1a       | 2.78556509 | 0.19223034 | 0.30778235 | 0.62456585 | 0.53225604 | NA         |
| Slc25a19    | 2027.94634 | 0.19206761 | 0.18175139 | 1.05676004 | 0.29062112 | 0.58458789 |
| AY074887    | 5.69208418 | 0.1920309  | 0.40705805 | 0.47175311 | 0.63710302 | NA         |
| Paip2       | 13151.1155 | 0.19201665 | 0.19098981 | 1.00537639 | 0.31471564 | 0.60933055 |
| Isoc2a      | 3898.89278 | 0.19199722 | 0.25273697 | 0.75967208 | 0.44745062 | 0.72061978 |
| Cdk15       | 1.99091118 | 0.19187075 | 0.28385256 | 0.67595215 | 0.49907102 | NA         |
| AU022252    | 1345.47084 | 0.19185806 | 0.20806888 | 0.92208915 | 0.35648207 | 0.64769865 |
| Ghrhr       | 1.07328503 | 0.19181424 | 0.2490736  | 0.77011069 | 0.44123424 | NA         |
| Sord        | 3729.32692 | 0.19173158 | 0.26437377 | 0.72522922 | 0.46831142 | 0.73621136 |
| Cnot8       | 6287.04569 | 0.19161922 | 0.24508564 | 0.781846   | 0.43430508 | 0.70860901 |
| Vsig1       | 4.23982412 | 0.1915549  | 0.3567672  | 0.53691847 | 0.59132393 | NA         |



|             |            |            |            |            |            |            |
|-------------|------------|------------|------------|------------|------------|------------|
| Il23r       | 0.78670812 | 0.19155303 | 0.21082808 | 0.90857452 | 0.36357476 | NA         |
| Bpifc       | 0.78670812 | 0.19155303 | 0.21082808 | 0.90857452 | 0.36357476 | NA         |
| Cyp2b9      | 0.78670812 | 0.19155303 | 0.21082808 | 0.90857452 | 0.36357476 | NA         |
| Tmed4       | 2956.33327 | 0.19154662 | 0.17666557 | 1.08423289 | 0.27826155 | 0.5707454  |
| Mir18b      | 2.00346101 | 0.19132693 | 0.28286453 | 0.67639069 | 0.49879263 | NA         |
| Tmem14a     | 503.848771 | 0.19130537 | 0.22830435 | 0.83794008 | 0.40206436 | 0.68675204 |
| Palld       | 2045.24115 | 0.19126859 | 0.29599904 | 0.64617976 | 0.51816295 | 0.76808698 |
| Zfp553      | 5576.03898 | 0.19091429 | 0.24228954 | 0.78795928 | 0.43072053 | 0.70667088 |
| Dido1       | 8998.16494 | 0.19090879 | 0.26545303 | 0.71918103 | 0.47202938 | 0.73859646 |
| 2510039O18I | 5277.42865 | 0.19082666 | 0.19393891 | 0.98395241 | 0.32513891 | 0.6188465  |
| Phc2        | 1736.29799 | 0.1907458  | 0.16512335 | 1.15517159 | 0.24802017 | 0.54125198 |
| C1qa        | 1.06612929 | 0.19069794 | 0.24871369 | 0.76673682 | 0.44323801 | NA         |
| 4930503B20F | 3.20435449 | 0.19049537 | 0.37792359 | 0.5040579  | 0.61422069 | NA         |
| Rho         | 3.04847462 | 0.19042683 | 0.29984491 | 0.63508441 | 0.52537336 | NA         |
| Plcb1       | 48.6859152 | 0.19031812 | 0.40942597 | 0.46484134 | 0.64204508 | 0.84385084 |
| Vipas39     | 2960.15584 | 0.19022324 | 0.18718026 | 1.01625695 | 0.30950704 | 0.60444616 |
| Polr3gl     | 523.839746 | 0.19019801 | 0.29137017 | 0.65277104 | 0.51390389 | 0.76592775 |
| Gbp7        | 8.09631459 | 0.1901746  | 0.4238981  | 0.44863282 | 0.65369655 | 0.85139323 |
| Tubb3       | 4045.44485 | 0.19014281 | 0.29018096 | 0.65525595 | 0.51230297 | 0.76528308 |
| Khsrp       | 13123.9797 | 0.19013682 | 0.20945189 | 0.9077828  | 0.36399299 | 0.65406636 |
| Hoxd3       | 5.8008509  | 0.19000855 | 0.39589021 | 0.47995264 | 0.63126107 | NA         |
| T           | 70.9579076 | 0.18974577 | 0.38279422 | 0.49568608 | 0.62011591 | 0.83138912 |
| Cox17       | 4884.51099 | 0.18970354 | 0.22248177 | 0.85267004 | 0.39384231 | 0.68150459 |
| Deb1        | 846.940233 | 0.18949217 | 0.22860221 | 0.82891664 | 0.40715158 | 0.69113538 |
| Crtap       | 7434.67271 | 0.18945917 | 0.20695433 | 0.9154637  | 0.35994825 | 0.65095421 |
| Gimap4      | 0.77415829 | 0.18945625 | 0.20980989 | 0.90299006 | 0.36653117 | NA         |
| F10         | 0.77415829 | 0.18945625 | 0.20980989 | 0.90299006 | 0.36653117 | NA         |
| Gm5122      | 0.77415829 | 0.18945625 | 0.20980989 | 0.90299006 | 0.36653117 | NA         |
| 9530068E07F | 3058.50937 | 0.18944738 | 0.17677384 | 1.07169355 | 0.2838577  | 0.57623655 |
| A630023A22I | 18.4800907 | 0.18929045 | 0.41145972 | 0.46004612 | 0.64548312 | 0.84629525 |
| Ppcdc       | 1530.6041  | 0.18926051 | 0.2241612  | 0.84430541 | 0.39849877 | 0.68445486 |
| Vstm2l      | 33.6356394 | 0.18915584 | 0.4076863  | 0.463974   | 0.64266638 | 0.84431062 |
| Sec14l1     | 9327.26234 | 0.18913396 | 0.18931511 | 0.99904314 | 0.31777379 | 0.61159656 |
| Snord34     | 131.944927 | 0.18908742 | 0.32861208 | 0.57541224 | 0.56501253 | 0.80125038 |
| Gbp8        | 10.3612396 | 0.1890743  | 0.41716959 | 0.45323127 | 0.65038222 | 0.84904399 |
| Arhgap30    | 2695.26399 | 0.18902103 | 0.24380232 | 0.77530449 | 0.43815976 | 0.71192377 |
| Lmo4        | 305.010343 | 0.18893091 | 0.35850471 | 0.526997   | 0.59819567 | 0.81984777 |
| Tssk5       | 1.59326914 | 0.18884907 | 0.27559935 | 0.68523046 | 0.49319851 | NA         |
| 4933439K11F | 1.59326914 | 0.18884907 | 0.27559935 | 0.68523046 | 0.49319851 | NA         |
| Zscan10     | 6817.41989 | 0.18884657 | 0.23846177 | 0.79193643 | 0.42839774 | 0.7047819  |
| Mbd1        | 1100.11469 | 0.18875785 | 0.21384652 | 0.88267907 | 0.37740969 | 0.66728175 |

|             |            |            |            |            |            |            |
|-------------|------------|------------|------------|------------|------------|------------|
| Pagr1a      | 2919.1636  | 0.18863578 | 0.18480583 | 1.02072416 | 0.30738515 | 0.60195774 |
| Cuedc2      | 5017.82347 | 0.18847187 | 0.19422926 | 0.97035776 | 0.33186819 | 0.62518259 |
| Cdh22       | 48.7280316 | 0.18842671 | 0.43211464 | 0.43605722 | 0.66279521 | 0.85628715 |
| Sv2a        | 59.9199061 | 0.18832538 | 0.39922535 | 0.47172699 | 0.63712167 | 0.84100493 |
| Slc14a2     | 0.76700255 | 0.18825211 | 0.20922103 | 0.89977622 | 0.36823935 | NA         |
| Gpr37       | 0.79386386 | 0.18823635 | 0.20916498 | 0.899942   | 0.36815112 | NA         |
| H2-M2       | 0.79386386 | 0.18823635 | 0.20916498 | 0.899942   | 0.36815112 | NA         |
| Mettl7b     | 0.79386386 | 0.18823635 | 0.20916498 | 0.899942   | 0.36815112 | NA         |
| 4933402J07R | 0.79386386 | 0.18823635 | 0.20916498 | 0.899942   | 0.36815112 | NA         |
| Agtr2       | 0.79386386 | 0.18823635 | 0.20916498 | 0.899942   | 0.36815112 | NA         |
| Pnpla5      | 0.79386386 | 0.18823635 | 0.20916498 | 0.899942   | 0.36815112 | NA         |
| Mroh5       | 0.79386386 | 0.18823635 | 0.20916498 | 0.899942   | 0.36815112 | NA         |
| Daw1        | 0.79386386 | 0.18823635 | 0.20916498 | 0.899942   | 0.36815112 | NA         |
| Pex14       | 1995.44517 | 0.18821175 | 0.1994205  | 0.94379339 | 0.34527524 | 0.63779826 |
| Exd1        | 310.994444 | 0.1881765  | 0.27638077 | 0.6808596  | 0.49596033 | 0.75562645 |
| Pla2g16     | 1322.84468 | 0.18813835 | 0.29853473 | 0.63020588 | 0.52855989 | 0.77562901 |
| Ankar       | 1.71871942 | 0.18801534 | 0.30841893 | 0.60961023 | 0.54212003 | NA         |
| Tk1         | 5702.26893 | 0.18789402 | 0.15597462 | 1.20464483 | 0.22834044 | 0.51898893 |
| Emilin1     | 296.190488 | 0.18767261 | 0.27424041 | 0.68433609 | 0.49376296 | 0.7539776  |
| Syt12       | 57.5177485 | 0.18767075 | 0.42049303 | 0.44631121 | 0.65537246 | 0.85234189 |
| Elf2        | 4919.49411 | 0.1876668  | 0.15728627 | 1.19315438 | 0.23280892 | 0.52452319 |
| Eps15       | 4839.47441 | 0.18757865 | 0.23444181 | 0.8001075  | 0.42364852 | 0.70243716 |
| Irx1        | 3.44007917 | 0.18748007 | 0.33229229 | 0.56420229 | 0.57261647 | NA         |
| Tec         | 174.925908 | 0.18744097 | 0.28444541 | 0.65896991 | 0.50991509 | 0.76423377 |
| Emc8        | 6100.41836 | 0.18742774 | 0.22766904 | 0.82324649 | 0.41036784 | 0.69309338 |
| Rab35       | 4578.19112 | 0.18728286 | 0.16919337 | 1.10691607 | 0.26833022 | 0.56110753 |
| Slc26a1     | 4.30176757 | 0.18705743 | 0.39021686 | 0.47936789 | 0.63167694 | NA         |
| Mpped1      | 9.29385065 | 0.18701083 | 0.42837615 | 0.43655752 | 0.66243227 | 0.85619416 |
| Kcnq5       | 5.83019634 | 0.18700819 | 0.41990131 | 0.44536225 | 0.65605799 | NA         |
| Ccl6        | 3.24576393 | 0.18698901 | 0.38190063 | 0.4896274  | 0.62439758 | NA         |
| Cds2        | 12855.2868 | 0.18696647 | 0.19372705 | 0.96510259 | 0.33449343 | 0.62758652 |
| Gfy         | 5.7802469  | 0.18696095 | 0.41427426 | 0.45129753 | 0.65177513 | NA         |
| Limk2       | 6634.36904 | 0.1869077  | 0.18547235 | 1.00773889 | 0.31357983 | 0.60796408 |
| Atp5k       | 6632.03904 | 0.18683192 | 0.21961914 | 0.8507087  | 0.39493119 | 0.68233238 |
| Polr2d      | 4112.89431 | 0.18673047 | 0.18038851 | 1.03515719 | 0.30059551 | 0.59548544 |
| Exosc5      | 3586.31613 | 0.18671051 | 0.18254259 | 1.02283263 | 0.30638699 | 0.60075955 |
| Gm20362     | 7.43320161 | 0.18670867 | 0.41181906 | 0.4533755  | 0.65027837 | 0.84900546 |
| Hist1h2bc   | 125.252637 | 0.18669292 | 0.38666213 | 0.48283217 | 0.6292149  | 0.83631803 |
| Rab17       | 211.439653 | 0.18656109 | 0.37092942 | 0.50295577 | 0.61499537 | 0.82953469 |
| Gm1661      | 2.28753404 | 0.18645879 | 0.32076875 | 0.58128729 | 0.56104685 | NA         |
| Gle1        | 3619.31046 | 0.18644335 | 0.18774821 | 0.99304998 | 0.3206856  | 0.61465951 |

|             |            |            |            |            |            |            |
|-------------|------------|------------|------------|------------|------------|------------|
| Timm13      | 4223.18119 | 0.18626827 | 0.22195791 | 0.83920536 | 0.40135408 | 0.68647792 |
| Iqgap1      | 33716.9577 | 0.18622375 | 0.19815231 | 0.93980103 | 0.34731963 | 0.63972138 |
| Ciao1       | 3395.70029 | 0.1861184  | 0.16302681 | 1.14164289 | 0.25360249 | 0.54630452 |
| Aldh5a1     | 1889.16735 | 0.18596583 | 0.25352225 | 0.73352864 | 0.46323606 | 0.73297798 |
| Col27a1     | 303.629707 | 0.18596551 | 0.34779042 | 0.53470568 | 0.59285339 | 0.81705522 |
| Hipk4       | 86.3995244 | 0.18592983 | 0.30758801 | 0.60447684 | 0.54552666 | 0.78674628 |
| Fgf13       | 170.018407 | 0.18590427 | 0.42527113 | 0.43714293 | 0.6620077  | 0.85598085 |
| Ism1        | 3.86289453 | 0.18586296 | 0.36489292 | 0.50936301 | 0.6104978  | NA         |
| D17H6S53E   | 416.08826  | 0.18585918 | 0.23223305 | 0.80031323 | 0.42352934 | 0.70238934 |
| Acsbg2      | 215.515118 | 0.18582757 | 0.30473431 | 0.60980191 | 0.54199303 | 0.78505055 |
| Pde6c       | 1.1272443  | 0.18567624 | 0.25368    | 0.73193095 | 0.46421072 | NA         |
| Slc39a1     | 3891.80701 | 0.1856347  | 0.20315436 | 0.91376183 | 0.36084201 | 0.65179488 |
| Ncoa5       | 2682.76289 | 0.18558834 | 0.22840084 | 0.81255542 | 0.416473   | 0.69837863 |
| Sumf1       | 2232.96243 | 0.18553049 | 0.15288558 | 1.21352516 | 0.2249291  | 0.51439301 |
| Col4a3bp    | 3574.4676  | 0.18549833 | 0.23342383 | 0.79468465 | 0.42679696 | 0.70402942 |
| Gls2        | 2851.99097 | 0.18535945 | 0.18712216 | 0.99057991 | 0.32189075 | 0.61624069 |
| Trim30b     | 1.10076037 | 0.185331   | 0.24980935 | 0.74188974 | 0.45815414 | NA         |
| Rab5c       | 8858.59172 | 0.18528274 | 0.22614416 | 0.81931251 | 0.41260814 | 0.69515344 |
| Tom20l      | 10.4789172 | 0.18518659 | 0.40402792 | 0.45835097 | 0.64670031 | 0.84723143 |
| Manf        | 6723.7092  | 0.18511233 | 0.17878336 | 1.03540022 | 0.30048204 | 0.59541367 |
| Mterfd2     | 1487.87887 | 0.18498051 | 0.17183226 | 1.07651794 | 0.28169568 | 0.57405969 |
| Ppp1r13b    | 1331.67511 | 0.18495983 | 0.24629807 | 0.75095933 | 0.45267713 | 0.72421877 |
| Tinf2       | 4226.27365 | 0.18480454 | 0.18803129 | 0.98283925 | 0.32568656 | 0.6191628  |
| Ccl8        | 1.30600454 | 0.18470112 | 0.20667584 | 0.89367542 | 0.37149558 | NA         |
| Gria2       | 2.50797924 | 0.18468728 | 0.32935624 | 0.56075234 | 0.57496638 | NA         |
| C030046E11F | 3976.51636 | 0.18460429 | 0.21938844 | 0.84144951 | 0.40009616 | 0.68523795 |
| Cdh16       | 2.52446455 | 0.18450548 | 0.31111672 | 0.59304265 | 0.55315261 | NA         |
| Tmem200c    | 1.09536628 | 0.18448459 | 0.24954883 | 0.7392725  | 0.45974154 | NA         |
| Gm14403     | 1204.80415 | 0.18448073 | 0.20941559 | 0.88093125 | 0.37835503 | 0.66771292 |
| Zfp768      | 200.367591 | 0.18435509 | 0.25346922 | 0.72732733 | 0.46702546 | 0.73566899 |
| Bhlha15     | 69.675956  | 0.18428995 | 0.37755227 | 0.48811772 | 0.62546646 | 0.83404467 |
| Lypd6b      | 1.6183688  | 0.18420641 | 0.27133693 | 0.67888439 | 0.49721112 | NA         |
| Nav1        | 4147.66864 | 0.18410362 | 0.25651293 | 0.71771672 | 0.47293197 | 0.73930088 |
| 2610002M06  | 481.690356 | 0.18407759 | 0.25049455 | 0.73485667 | 0.46242679 | 0.73259973 |
| Isca1       | 1735.65213 | 0.18406975 | 0.18693667 | 0.98466366 | 0.32478931 | 0.6188465  |
| Spats2      | 3991.90518 | 0.18401628 | 0.1619738  | 1.13608669 | 0.25592029 | 0.54871314 |
| Inhbc       | 6.46340619 | 0.1839975  | 0.40581793 | 0.45339913 | 0.65026136 | 0.84900546 |
| Mbnl1       | 1392.9231  | 0.18393611 | 0.32575429 | 0.56464678 | 0.57231404 | 0.80572656 |
| Nt5c        | 1859.40868 | 0.18379183 | 0.26705027 | 0.68822934 | 0.49130837 | 0.75186608 |
| Mir302a     | 1.13477743 | 0.1836686  | 0.24739345 | 0.74241498 | 0.45783595 | NA         |
| 1700105P06F | 3.57387847 | 0.18357802 | 0.37182017 | 0.49372797 | 0.62149831 | NA         |

|             |            |            |            |            |            |            |
|-------------|------------|------------|------------|------------|------------|------------|
| Fbxl19      | 4656.77302 | 0.18352614 | 0.22620959 | 0.8113102  | 0.41718755 | 0.69868745 |
| Olf307      | 1.29345471 | 0.18352091 | 0.20609331 | 0.89047486 | 0.37321096 | NA         |
| Pip5k1a     | 2816.50901 | 0.18350527 | 0.22677048 | 0.80921146 | 0.41839352 | 0.69924102 |
| Mfsd2a      | 40.3990798 | 0.18342164 | 0.36807014 | 0.49833337 | 0.61824909 | 0.83047349 |
| Bnpl        | 210.345416 | 0.18328518 | 0.40294756 | 0.45486112 | 0.64920916 | 0.84869184 |
| Amotl1      | 2595.36232 | 0.18305731 | 0.20204314 | 0.90603084 | 0.36491953 | 0.65484233 |
| Esd         | 6912.19843 | 0.18303478 | 0.1863329  | 0.98229989 | 0.32595213 | 0.61928913 |
| Oas2        | 245.672075 | 0.18295594 | 0.23890871 | 0.76579854 | 0.44379618 | 0.71711081 |
| Rnf183      | 2.94525292 | 0.18286601 | 0.35988851 | 0.5081185  | 0.61137024 | NA         |
| Gfi1        | 2.92241689 | 0.18282843 | 0.36611445 | 0.49937506 | 0.61751518 | NA         |
| Stoml1      | 1952.6481  | 0.18264278 | 0.20122056 | 0.90767455 | 0.36405019 | 0.65406636 |
| Ddx25       | 227.775571 | 0.182595   | 0.29117234 | 0.62710286 | 0.53059181 | 0.77760181 |
| Sstr1       | 1.6303046  | 0.18245908 | 0.26463263 | 0.68948068 | 0.49052083 | NA         |
| 2900076A07F | 199.671808 | 0.18230588 | 0.27235085 | 0.66937876 | 0.5032539  | 0.75952071 |
| 5730508B09F | 191.034537 | 0.18225845 | 0.40589859 | 0.44902458 | 0.65341392 | 0.85120495 |
| Ubr3        | 10599.5874 | 0.18225511 | 0.21331306 | 0.854402   | 0.39288229 | 0.68081934 |
| Nsg1        | 67.6237579 | 0.18216193 | 0.33671925 | 0.54099054 | 0.5885141  | 0.81419144 |
| Pramel3     | 9.28998476 | 0.18208506 | 0.42674858 | 0.42667994 | 0.66961246 | 0.86052797 |
| Agpat2      | 2809.6052  | 0.18207516 | 0.22464793 | 0.81049117 | 0.41765794 | 0.69868745 |
| Timm22      | 2038.82108 | 0.18205653 | 0.21134562 | 0.86141614 | 0.38900889 | 0.67794934 |
| Atxn7l3b    | 5342.24203 | 0.182026   | 0.18619771 | 0.97759528 | 0.32827453 | 0.62193444 |
| C5ar2       | 1.60042488 | 0.18192957 | 0.27084504 | 0.67171091 | 0.50176775 | NA         |
| Zic4        | 0.75445272 | 0.18192789 | 0.2060362  | 0.88298993 | 0.37724171 | NA         |
| Scarletltr  | 0.75445272 | 0.18192789 | 0.2060362  | 0.88298993 | 0.37724171 | NA         |
| Olf658      | 0.75445272 | 0.18192789 | 0.2060362  | 0.88298993 | 0.37724171 | NA         |
| Exoc8       | 1529.76915 | 0.18181108 | 0.22007794 | 0.82612133 | 0.40873527 | 0.69240111 |
| Casp7       | 983.838015 | 0.18170726 | 0.2709213  | 0.67070128 | 0.50241085 | 0.75924357 |
| Rbx1        | 6353.45108 | 0.18168923 | 0.18185751 | 0.9990747  | 0.31775851 | 0.61159656 |
| Ankrd53     | 1.42874672 | 0.18167116 | 0.28835204 | 0.63003251 | 0.52867331 | NA         |
| Wdr26       | 7862.91095 | 0.18167112 | 0.18796378 | 0.96652194 | 0.33378307 | 0.62713382 |
| Kcnd3os     | 1.13440004 | 0.18161739 | 0.25093246 | 0.72377001 | 0.46920694 | NA         |
| Caln1       | 1.13440004 | 0.18161739 | 0.25093246 | 0.72377001 | 0.46920694 | NA         |
| Pml         | 9238.35478 | 0.18159981 | 0.20839856 | 0.87140623 | 0.38353238 | 0.67248981 |
| Prss48      | 15.3190891 | 0.18159554 | 0.43220704 | 0.42015868 | 0.67436954 | 0.86375836 |
| Igsf9       | 326.537854 | 0.18151601 | 0.34506792 | 0.52602979 | 0.59886751 | 0.82005546 |
| Atf7ip      | 5200.95394 | 0.18137629 | 0.27734164 | 0.65398146 | 0.51312375 | 0.76586884 |
| Fkbp9       | 19526.2287 | 0.18134026 | 0.16717863 | 1.08470959 | 0.2780503  | 0.5704433  |
| 4930453L07F | 2.39802353 | 0.18133773 | 0.25973002 | 0.69817779 | 0.48506602 | NA         |
| Daxx        | 5060.59499 | 0.18127641 | 0.21187911 | 0.85556527 | 0.39223829 | 0.68016253 |
| Col4a1      | 1991.68139 | 0.18124934 | 0.4322697  | 0.41929689 | 0.67499917 | 0.86408562 |
| Napa        | 5608.49638 | 0.18103568 | 0.18606044 | 0.97299394 | 0.33055631 | 0.62369343 |

|             |            |            |            |            |            |            |
|-------------|------------|------------|------------|------------|------------|------------|
| ErbB3       | 1844.33542 | 0.1810309  | 0.29016035 | 0.62389951 | 0.53269358 | 0.77871009 |
| Ehd3        | 174.939777 | 0.18098394 | 0.3032771  | 0.59676099 | 0.55066697 | 0.79097822 |
| Tfpt        | 1049.113   | 0.18094491 | 0.22742347 | 0.79562985 | 0.42624721 | 0.70402942 |
| Plod2       | 7042.84517 | 0.18093922 | 0.25274029 | 0.71590967 | 0.47404713 | 0.74015587 |
| Ufc1        | 4294.81019 | 0.18083246 | 0.19440047 | 0.93020585 | 0.35226452 | 0.64439796 |
| Gpr114      | 98.294075  | 0.18076664 | 0.4113503  | 0.43944697 | 0.6603377  | 0.85504245 |
| Sema6d      | 2.0708524  | 0.1806951  | 0.28174651 | 0.64133926 | 0.52130229 | NA         |
| Mrpl37      | 4628.36727 | 0.18066347 | 0.17265909 | 1.04635947 | 0.2953951  | 0.59006926 |
| Prr7        | 113.095037 | 0.18065977 | 0.32053518 | 0.56361916 | 0.57301335 | 0.80618651 |
| Ugt3a2      | 1.1133102  | 0.18055597 | 0.24641286 | 0.7327376  | 0.46371848 | NA         |
| Zdhhc16     | 2150.48092 | 0.18052076 | 0.16207241 | 1.1138278  | 0.26535307 | 0.55725936 |
| Gm7030      | 26.6635943 | 0.1804372  | 0.41850602 | 0.43114601 | 0.66636221 | 0.8585804  |
| Robo3       | 14.3925968 | 0.18023866 | 0.4315277  | 0.41767575 | 0.67618421 | 0.864488   |
| Snora69     | 34.2099913 | 0.18021226 | 0.39036041 | 0.46165609 | 0.64432796 | 0.84549356 |
| Mrps18c     | 3572.65233 | 0.18019503 | 0.20592995 | 0.87503072 | 0.38155719 | 0.67053858 |
| 4933411E08F | 1.64447534 | 0.1801272  | 0.27618361 | 0.65220093 | 0.51427156 | NA         |
| Brap        | 2231.79826 | 0.18008505 | 0.19794227 | 0.90978574 | 0.36293552 | 0.65337545 |
| Thoc6       | 4336.74252 | 0.18008125 | 0.1631104  | 1.10404519 | 0.26957354 | 0.56260264 |
| Gmfg        | 504.659614 | 0.1800377  | 0.266711   | 0.67502915 | 0.49965724 | 0.75725268 |
| Krtcap2     | 3201.48227 | 0.18001515 | 0.21240967 | 0.84749036 | 0.39672186 | 0.68311652 |
| Pcdhga12    | 128.549891 | 0.17985924 | 0.35393782 | 0.50816619 | 0.6113368  | 0.82680328 |
| Bloc1s2     | 2817.74941 | 0.17976798 | 0.17069795 | 1.05313496 | 0.29227914 | 0.58609887 |
| 2610206C17F | 4.60503164 | 0.17970665 | 0.39926076 | 0.45009845 | 0.65263946 | NA         |
| Lrrn3       | 4.69381299 | 0.179688   | 0.38902633 | 0.46189162 | 0.64415905 | NA         |
| Accs        | 505.506743 | 0.17966618 | 0.19594013 | 0.91694427 | 0.35917184 | 0.65015497 |
| Igf2r       | 13031.1551 | 0.17955702 | 0.22475988 | 0.79888374 | 0.42435783 | 0.70286384 |
| Fam160a2    | 4476.63382 | 0.17952885 | 0.1767692  | 1.0156116  | 0.30981438 | 0.60461696 |
| 2610028H24I | 11.283474  | 0.17933232 | 0.4316248  | 0.41548196 | 0.67778912 | 0.86555439 |
| Rgcc        | 674.115701 | 0.17927809 | 0.42130815 | 0.42552722 | 0.67045238 | 0.86110051 |
| Dcaf10      | 1278.64784 | 0.17925568 | 0.18570757 | 0.9652578  | 0.3344157  | 0.62758652 |
| Chrm3       | 5.8450421  | 0.17918503 | 0.3821737  | 0.46885756 | 0.63917145 | NA         |
| Dctn5       | 3284.191   | 0.17884061 | 0.15280624 | 1.17037505 | 0.24185007 | 0.53423444 |
| Zscan4c     | 55.9572794 | 0.17881003 | 0.42416538 | 0.42155735 | 0.67334815 | 0.86318004 |
| Banp        | 3165.97841 | 0.17871452 | 0.19331721 | 0.92446256 | 0.35524553 | 0.64696432 |
| Ikzf5       | 1602.37507 | 0.17858087 | 0.20079711 | 0.88935977 | 0.37380976 | 0.6634462  |
| Mthfd1      | 26691.736  | 0.17857351 | 0.17294242 | 1.03256048 | 0.30180963 | 0.59697807 |
| Ypel4       | 2.08577791 | 0.17854569 | 0.28419349 | 0.62825398 | 0.52983757 | NA         |
| Mir6907     | 1.44814198 | 0.17853369 | 0.22941121 | 0.77822564 | 0.436436   | NA         |
| Arhgap36    | 1.44814198 | 0.17853369 | 0.22941121 | 0.77822564 | 0.436436   | NA         |
| Nudt19      | 4238.80199 | 0.17838367 | 0.16687667 | 1.06895513 | 0.28508989 | 0.57794718 |
| Nlrp4e      | 2.84104937 | 0.17835527 | 0.29536917 | 0.60383846 | 0.54595105 | NA         |

|             |            |            |            |            |            |            |
|-------------|------------|------------|------------|------------|------------|------------|
| Ubr4        | 26200.2728 | 0.17811461 | 0.25610747 | 0.69546822 | 0.48676192 | 0.74813547 |
| Tmem243     | 1194.43845 | 0.17799013 | 0.17406867 | 1.02252822 | 0.30653096 | 0.60096608 |
| Acnat1      | 4.10604099 | 0.17786613 | 0.30144963 | 0.59003598 | 0.55516653 | NA         |
| Myo7a       | 651.515691 | 0.17771304 | 0.37284348 | 0.47664247 | 0.63361674 | 0.83901345 |
| Trp53i13    | 501.788322 | 0.17768206 | 0.2410658  | 0.73706871 | 0.46108057 | 0.73142754 |
| Mir3058     | 6.43765187 | 0.17766312 | 0.40959349 | 0.43375473 | 0.66446656 | 0.85719825 |
| Med18       | 1285.90326 | 0.17749364 | 0.19448623 | 0.91262833 | 0.36143805 | 0.65221104 |
| Dnaaf3      | 1304.53165 | 0.17744503 | 0.20572119 | 0.86255105 | 0.38838435 | 0.67748384 |
| Adat2       | 2143.59804 | 0.17736627 | 0.21966364 | 0.80744485 | 0.41941024 | 0.70003741 |
| Wbscr25     | 3.86674138 | 0.17730078 | 0.39244882 | 0.45178064 | 0.65142702 | NA         |
| Abhd17b     | 2441.34403 | 0.1772618  | 0.18911814 | 0.93730721 | 0.34860056 | 0.64086621 |
| Trim30a     | 10.2352306 | 0.1770692  | 0.39815741 | 0.4447216  | 0.65652096 | 0.85271673 |
| Tmem115     | 1116.67948 | 0.17705818 | 0.20945552 | 0.84532595 | 0.39792888 | 0.68393999 |
| Dph3        | 2503.33253 | 0.17688592 | 0.19180294 | 0.92222735 | 0.35641    | 0.64764337 |
| Abhd11      | 2371.41015 | 0.1767653  | 0.19571005 | 0.90319987 | 0.36641983 | 0.65677671 |
| 4930412C18F | 16.0489467 | 0.17671512 | 0.4253368  | 0.41547103 | 0.67779712 | 0.86555439 |
| Rer1        | 7185.73704 | 0.17654915 | 0.18674917 | 0.94538118 | 0.34446431 | 0.63755825 |
| Nfib        | 1369.69536 | 0.17654359 | 0.22179403 | 0.79597992 | 0.42604371 | 0.70402942 |
| Fam166a     | 4.11771511 | 0.17652849 | 0.38070936 | 0.46368309 | 0.64287481 | NA         |
| Rnf114      | 7097.25641 | 0.17652539 | 0.18830884 | 0.93742487 | 0.34854005 | 0.64083073 |
| Tmem199     | 3787.91768 | 0.17647597 | 0.21502751 | 0.82071346 | 0.4118095  | 0.69435645 |
| Frrs1       | 3325.55528 | 0.17638753 | 0.2660661  | 0.66294626 | 0.50736497 | 0.76261673 |
| Smtnl2      | 7794.94574 | 0.17633917 | 0.17758193 | 0.99300175 | 0.3207091  | 0.61465951 |
| Mgarp       | 904.20432  | 0.17626401 | 0.32599369 | 0.54069762 | 0.58871602 | 0.8143171  |
| Ablim3      | 18.9994319 | 0.17624005 | 0.4316059  | 0.40833558 | 0.68302732 | 0.86824483 |
| Adamtsl1    | 87.0407961 | 0.17618688 | 0.34863899 | 0.50535622 | 0.61330866 | 0.82834489 |
| 1700013F07F | 4.01868528 | 0.17607856 | 0.38568723 | 0.45653199 | 0.64800747 | NA         |
| Dstyk       | 2226.3333  | 0.17602351 | 0.1958349  | 0.89883625 | 0.36873989 | 0.65913197 |
| C330022C24F | 2.30923791 | 0.17596205 | 0.32219553 | 0.54613437 | 0.58497358 | NA         |
| Uqcr11      | 5722.82277 | 0.17591149 | 0.24489172 | 0.71832355 | 0.47255781 | 0.73916179 |
| Mir761      | 8.42151917 | 0.17579092 | 0.42950641 | 0.4092859  | 0.68232986 | 0.86782626 |
| Irf2bp1     | 1441.51342 | 0.17572301 | 0.24078708 | 0.72978586 | 0.46552109 | 0.73450877 |
| Ackr3       | 1440.85865 | 0.17571515 | 0.32761821 | 0.53634122 | 0.59172275 | 0.81634852 |
| LOC10050328 | 16.9793701 | 0.17570628 | 0.43199757 | 0.40672979 | 0.68420646 | 0.86900479 |
| Ift46       | 5313.73272 | 0.17569595 | 0.19023794 | 0.92355896 | 0.35571599 | 0.64739379 |
| Tmem203     | 281.02186  | 0.17567962 | 0.27111485 | 0.64798965 | 0.51699165 | 0.76793048 |
| Gltp        | 5450.37976 | 0.17563845 | 0.18520818 | 0.94832989 | 0.34296154 | 0.63667123 |
| Zfp324      | 516.312095 | 0.17554533 | 0.24023519 | 0.73072281 | 0.46494848 | 0.73410475 |
| BC089491    | 11.0827601 | 0.17550979 | 0.42800741 | 0.4100625  | 0.6817601  | 0.86734737 |
| Kcnv2       | 1.8930386  | 0.17550017 | 0.27959066 | 0.62770399 | 0.53019787 | NA         |
| 4921509O07I | 2.36553807 | 0.17545067 | 0.35096823 | 0.49990469 | 0.61714219 | NA         |

|             |            |            |            |            |            |            |
|-------------|------------|------------|------------|------------|------------|------------|
| Fat1        | 13527.9188 | 0.17539199 | 0.36877866 | 0.47560234 | 0.63435771 | 0.83928202 |
| Clcf1       | 11.8757289 | 0.17538235 | 0.43210247 | 0.40588138 | 0.68482976 | 0.86944308 |
| Sprn        | 10.8422132 | 0.17538096 | 0.37304704 | 0.47013095 | 0.63826146 | 0.84172354 |
| Med9os      | 11.7416105 | 0.1753141  | 0.43201723 | 0.40580349 | 0.684887   | 0.86944308 |
| Tor3a       | 701.806318 | 0.1750639  | 0.3313696  | 0.52830405 | 0.59728832 | 0.81955501 |
| Mtfr1l      | 4009.91333 | 0.1749576  | 0.16056091 | 1.08966493 | 0.27586077 | 0.56820011 |
| Gabrg3      | 17.2399392 | 0.17485072 | 0.41769374 | 0.41860985 | 0.67550129 | 0.86437262 |
| Mir688      | 2.8488928  | 0.17484991 | 0.34093217 | 0.51285834 | 0.60805041 | NA         |
| Optc        | 4.60330478 | 0.17481053 | 0.38534347 | 0.45364861 | 0.65008176 | NA         |
| Peli1       | 2938.43615 | 0.17476093 | 0.18935943 | 0.92290586 | 0.35605627 | 0.64764054 |
| Gypc        | 2.0881152  | 0.17475612 | 0.34034897 | 0.51346158 | 0.60762848 | NA         |
| Atp5s       | 751.154696 | 0.17447102 | 0.26616073 | 0.65551    | 0.51213945 | 0.76528308 |
| Gm5662      | 60.4161355 | 0.17445243 | 0.43226925 | 0.40357354 | 0.68652635 | 0.87055301 |
| Nckipsd     | 1010.09988 | 0.17443943 | 0.2156303  | 0.80897456 | 0.41852978 | 0.69931842 |
| Snord35b    | 22.6007983 | 0.17442933 | 0.41599601 | 0.4193053  | 0.67499302 | 0.86408562 |
| Mtr         | 5443.18072 | 0.17439748 | 0.20601784 | 0.84651639 | 0.39726474 | 0.68346763 |
| E230025N22I | 50.7658992 | 0.17437622 | 0.39466232 | 0.4418365  | 0.65860752 | 0.85392743 |
| Mapre2      | 2619.2896  | 0.17423187 | 0.25858836 | 0.67378077 | 0.5004507  | 0.75785125 |
| Cct8l1      | 28.2037723 | 0.17409947 | 0.4115121  | 0.42307254 | 0.67224234 | 0.86226003 |
| Ttc32       | 377.734185 | 0.17393316 | 0.24313242 | 0.71538448 | 0.4743715  | 0.74043056 |
| Nxpe2       | 2.07933855 | 0.17389887 | 0.3223389  | 0.53949079 | 0.58954825 | NA         |
| Ang2        | 1.48277307 | 0.17383542 | 0.22981828 | 0.75640379 | 0.44940714 | NA         |
| Lgr6        | 52.7174737 | 0.17382928 | 0.41112147 | 0.42281733 | 0.67242854 | 0.86235661 |
| Ywhab       | 16969.9294 | 0.17380147 | 0.17305636 | 1.00430559 | 0.31523134 | 0.60949429 |
| Mrpl35      | 6356.32704 | 0.17379439 | 0.16659074 | 1.04324161 | 0.29683641 | 0.59122008 |
| Pin1        | 7250.87138 | 0.17377303 | 0.16653635 | 1.04345405 | 0.29673805 | 0.59122008 |
| H2-DMb1     | 502.988212 | 0.17363494 | 0.30963012 | 0.5607818  | 0.57494629 | 0.80673793 |
| Gsta1       | 1.12039228 | 0.17362854 | 0.20117915 | 0.86305434 | 0.38810759 | NA         |
| Aste1       | 1050.87611 | 0.17358797 | 0.18817006 | 0.92250579 | 0.35626481 | 0.64764054 |
| Gm7157      | 2.03755173 | 0.17356132 | 0.31958455 | 0.5430842  | 0.58707183 | NA         |
| Ccdc175     | 7.52629123 | 0.17353634 | 0.40321651 | 0.43038005 | 0.66691921 | 0.85904585 |
| Gm17769     | 3.56421885 | 0.17343138 | 0.38861166 | 0.44628454 | 0.65539172 | NA         |
| Pam16       | 1125.05859 | 0.17336849 | 0.23159539 | 0.7485835  | 0.45410828 | 0.72503469 |
| 5730559C18F | 573.072183 | 0.17329879 | 0.31976632 | 0.5419545  | 0.58784985 | 0.81353146 |
| Tmem159     | 417.024416 | 0.17329372 | 0.25351783 | 0.68355633 | 0.49425537 | 0.75435914 |
| Dclre1b     | 1207.17163 | 0.17329175 | 0.22152864 | 0.78225441 | 0.43406507 | 0.70858066 |
| Rgs2        | 3.92836196 | 0.17326407 | 0.36212779 | 0.47846112 | 0.63232204 | NA         |
| Ptpn18      | 94.1216766 | 0.17325238 | 0.33772012 | 0.51300581 | 0.60794726 | 0.82540491 |
| Nrbf2       | 670.145199 | 0.17324278 | 0.18350559 | 0.94407359 | 0.34513205 | 0.63773152 |
| Lgr5        | 2.63024765 | 0.17319742 | 0.28838423 | 0.60057868 | 0.54812064 | NA         |
| Gad1os      | 2.66259285 | 0.17312181 | 0.30285095 | 0.57164032 | 0.56756568 | NA         |

|             |            |            |            |            |            |            |
|-------------|------------|------------|------------|------------|------------|------------|
| Mospd4      | 3.87451115 | 0.17310212 | 0.39418732 | 0.43913671 | 0.66056248 | NA         |
| Zfp346      | 2879.03519 | 0.17307443 | 0.17977781 | 0.96271299 | 0.33569157 | 0.62835095 |
| Phf23       | 7327.68783 | 0.17306865 | 0.17154603 | 1.00887588 | 0.31303417 | 0.60773961 |
| Pygo2       | 3990.73473 | 0.17306283 | 0.24336675 | 0.71111945 | 0.47701022 | 0.7420212  |
| Runx3       | 64.4993379 | 0.17282292 | 0.34266393 | 0.50435106 | 0.6140147  | 0.8287946  |
| Fam189a2    | 687.341579 | 0.17281079 | 0.24869925 | 0.69485849 | 0.48714399 | 0.74857472 |
| Dock2       | 108.152582 | 0.17280461 | 0.37992023 | 0.45484445 | 0.64922115 | 0.84869184 |
| Fam65a      | 1982.46114 | 0.17279954 | 0.21235503 | 0.81372943 | 0.41579997 | 0.69783135 |
| Rftn1       | 539.870351 | 0.17274708 | 0.31555578 | 0.54743754 | 0.58407817 | 0.81141028 |
| Asic4       | 1.80631835 | 0.17272134 | 0.30745653 | 0.56177484 | 0.57426944 | NA         |
| Arfrp1      | 1832.74259 | 0.17267242 | 0.15876822 | 1.08757545 | 0.27678257 | 0.56928593 |
| Etfb        | 7766.26398 | 0.17263237 | 0.2544067  | 0.67856847 | 0.49741132 | 0.75628114 |
| Ndor1       | 2846.00321 | 0.17256128 | 0.19527368 | 0.88368943 | 0.37686389 | 0.6667361  |
| Ltbp4       | 6336.38034 | 0.17254717 | 0.24280244 | 0.71064842 | 0.47730213 | 0.74223918 |
| Tbcc        | 1267.52742 | 0.17249316 | 0.21525108 | 0.80135792 | 0.42292447 | 0.7019851  |
| Milr1       | 2.43781864 | 0.17244248 | 0.34739358 | 0.49638938 | 0.61961972 | NA         |
| Itga4       | 5.57250773 | 0.1724254  | 0.39849516 | 0.43269133 | 0.66523903 | NA         |
| Psmc8       | 13589.0643 | 0.17223954 | 0.18153381 | 0.94880145 | 0.3427216  | 0.63645375 |
| Smndc1      | 6832.54792 | 0.17218909 | 0.1921935  | 0.89591529 | 0.37029801 | 0.66053043 |
| Ubxn4       | 6623.55659 | 0.17216011 | 0.16779726 | 1.02600074 | 0.30489124 | 0.59964128 |
| Kctd17      | 1054.74078 | 0.17212829 | 0.21477251 | 0.80144468 | 0.42287426 | 0.70197732 |
| Syvn1       | 1734.03937 | 0.1719699  | 0.26093747 | 0.65904638 | 0.50986598 | 0.76423377 |
| Ptk2        | 5454.17928 | 0.17192541 | 0.16370558 | 1.05021104 | 0.2936211  | 0.58743107 |
| 4930596l21R | 2.45450581 | 0.17191788 | 0.35192317 | 0.48850971 | 0.62518885 | NA         |
| Epb4.1l4b   | 2713.23215 | 0.17191175 | 0.21418309 | 0.80263921 | 0.4221833  | 0.70127884 |
| Rspo3       | 1.63908125 | 0.17189883 | 0.27108555 | 0.63411285 | 0.52600717 | NA         |
| Tom1l2      | 1180.20207 | 0.17181067 | 0.23776468 | 0.72260802 | 0.46992074 | 0.73765956 |
| Mir6236     | 12368.1901 | 0.17164564 | 0.22384567 | 0.7668035  | 0.44319836 | 0.71664974 |
| Apoe        | 29429.8299 | 0.17163097 | 0.23492283 | 0.73058446 | 0.465033   | 0.73410475 |
| Khdc3       | 3006.13278 | 0.17161617 | 0.4322596  | 0.39702107 | 0.69135192 | 0.87379826 |
| Dennd5b     | 1305.77982 | 0.17140127 | 0.27770294 | 0.61721087 | 0.53709564 | 0.78110674 |
| Il1r1       | 69.3019597 | 0.17130851 | 0.35197645 | 0.48670445 | 0.62646779 | 0.83466421 |
| Ypel2       | 3334.71441 | 0.17124342 | 0.24632923 | 0.69518108 | 0.48694183 | 0.74833801 |
| Ap4b1       | 1760.32926 | 0.17106472 | 0.16286442 | 1.05035044 | 0.29355702 | 0.58737844 |
| 1110032A03f | 243.776065 | 0.17101442 | 0.30255351 | 0.56523695 | 0.57191261 | 0.80538015 |
| Ensa        | 6698.32591 | 0.17074636 | 0.18504403 | 0.92273372 | 0.35614599 | 0.64764054 |
| 2210404O09l | 759.9573   | 0.17074155 | 0.25476245 | 0.67019905 | 0.50273091 | 0.75933521 |
| Rab33a      | 148.043161 | 0.17055441 | 0.34092005 | 0.50027685 | 0.61688015 | 0.83032065 |
| Zfp119a     | 245.59119  | 0.17054302 | 0.24077832 | 0.7082989  | 0.47875966 | 0.74303308 |
| Ak5         | 32.71319   | 0.1705379  | 0.43087486 | 0.3957945  | 0.69225663 | 0.87437321 |
| 1700022A21f | 51.9950782 | 0.17049107 | 0.35534446 | 0.47979099 | 0.63137602 | 0.83751629 |



|             |            |            |            |            |            |            |
|-------------|------------|------------|------------|------------|------------|------------|
| Man1a2      | 4927.39218 | 0.17047135 | 0.20634932 | 0.82612993 | 0.40873039 | 0.69240111 |
| Nudt8       | 738.330845 | 0.17045321 | 0.27927561 | 0.61034048 | 0.54163629 | 0.78492088 |
| Rasgef1a    | 758.022539 | 0.1704464  | 0.18988978 | 0.89760706 | 0.36939507 | 0.65967648 |
| Sult2a5     | 1.65678852 | 0.17031653 | 0.2596398  | 0.65597234 | 0.51184192 | NA         |
| 5430402O13I | 4.32712294 | 0.17023747 | 0.36104591 | 0.47151196 | 0.63727518 | NA         |
| Gal3st2     | 1.10960411 | 0.17022476 | 0.19939783 | 0.85369413 | 0.39327449 | NA         |
| Akr1d1      | 1.10960411 | 0.17022476 | 0.19939783 | 0.85369413 | 0.39327449 | NA         |
| Mir6929     | 1.3849616  | 0.17018347 | 0.26589164 | 0.64004823 | 0.52214124 | NA         |
| Prm2        | 1.3849616  | 0.17018347 | 0.26589164 | 0.64004823 | 0.52214124 | NA         |
| Ankrd13a    | 8642.93832 | 0.17010322 | 0.15643764 | 1.0873548  | 0.27688004 | 0.56939453 |
| Mir7026     | 4.66098921 | 0.16990496 | 0.40520206 | 0.41930922 | 0.67499016 | NA         |
| Scara3      | 2.59958799 | 0.1697825  | 0.32102429 | 0.52887743 | 0.59689048 | NA         |
| Dgat1       | 1266.04238 | 0.16976093 | 0.17781029 | 0.9547306  | 0.33971395 | 0.63313658 |
| Chfr        | 6711.56916 | 0.16970423 | 0.18296663 | 0.92751466 | 0.35365938 | 0.64520848 |
| Scamp2      | 2445.04997 | 0.16967886 | 0.17653413 | 0.96116742 | 0.336468   | 0.6291874  |
| 4933427E11F | 4.96703504 | 0.16964972 | 0.40444168 | 0.41946647 | 0.67487525 | NA         |
| Dhx32       | 6604.86198 | 0.16958724 | 0.17927538 | 0.94595946 | 0.34416926 | 0.63739147 |
| Phf11d      | 8887.99641 | 0.16952434 | 0.26546522 | 0.63859341 | 0.52308747 | 0.77134419 |
| Gm5622      | 97.3503417 | 0.1695051  | 0.42896533 | 0.39514871 | 0.69273314 | 0.87461511 |
| Slc29a4     | 735.083433 | 0.16947955 | 0.2834988  | 0.59781399 | 0.54996406 | 0.79043355 |
| Uox         | 35.4875252 | 0.16945624 | 0.43219046 | 0.39208695 | 0.69499397 | 0.87520052 |
| Itga2       | 2.0250019  | 0.16933805 | 0.31761666 | 0.53315228 | 0.59392817 | NA         |
| Nfu1        | 5930.45184 | 0.16929113 | 0.17029846 | 0.99408494 | 0.32018151 | 0.61412854 |
| 1700110C19F | 2.8236524  | 0.16924469 | 0.35527149 | 0.47638128 | 0.63380277 | NA         |
| 1700065D16I | 1.0949889  | 0.16922083 | 0.24509646 | 0.69042543 | 0.48992669 | NA         |
| Chrna2      | 1.0949889  | 0.16922083 | 0.24509646 | 0.69042543 | 0.48992669 | NA         |
| 0610010B08F | 1.0949889  | 0.16922083 | 0.24509646 | 0.69042543 | 0.48992669 | NA         |
| Alox15      | 6.97875098 | 0.16920353 | 0.39005709 | 0.43379171 | 0.6644397  | 0.85719825 |
| Glce        | 4036.10292 | 0.16917083 | 0.17912427 | 0.9444328  | 0.34494853 | 0.63773152 |
| Zkscan4     | 72.2615422 | 0.16908956 | 0.34453634 | 0.49077424 | 0.62358613 | 0.83265488 |
| Prdm2       | 6334.88031 | 0.16901973 | 0.2224189  | 0.7599162  | 0.44730467 | 0.72045935 |
| 2610203C22F | 2.73633135 | 0.16898045 | 0.35594625 | 0.47473587 | 0.63497525 | NA         |
| Zscan4f     | 23.3300402 | 0.16897199 | 0.40883018 | 0.41330606 | 0.67938239 | 0.86613179 |
| Krt14       | 1.42437274 | 0.16896956 | 0.26259862 | 0.6434518  | 0.51993098 | NA         |
| Hadhb       | 2663.31312 | 0.16896955 | 0.15518495 | 1.08882688 | 0.27623024 | 0.56872206 |
| Mrgpre      | 13.7606144 | 0.168888   | 0.43226822 | 0.39070186 | 0.69601763 | 0.87578041 |
| Tfr2        | 15.6328602 | 0.16888129 | 0.43008582 | 0.39266881 | 0.69456411 | 0.87496374 |
| 9030612E09F | 4.14947144 | 0.1688307  | 0.36499375 | 0.46255778 | 0.64368138 | NA         |
| 2210416O15I | 1.63539496 | 0.16878882 | 0.31972839 | 0.52791316 | 0.59755961 | NA         |
| Gpr27       | 29.4581733 | 0.16864461 | 0.4192935  | 0.40221136 | 0.68752848 | 0.87088718 |
| C330007P06F | 1941.87679 | 0.16863429 | 0.17952978 | 0.93931099 | 0.3475711  | 0.63980565 |

|             |            |            |            |            |            |            |
|-------------|------------|------------|------------|------------|------------|------------|
| Lpin3       | 727.670573 | 0.16861415 | 0.29918278 | 0.5635824  | 0.57303837 | 0.80618651 |
| Hspa1a      | 60.223836  | 0.16860827 | 0.35286346 | 0.47782865 | 0.63277217 | 0.83846625 |
| Tacc2       | 9734.80991 | 0.16857083 | 0.22099162 | 0.76279286 | 0.44558694 | 0.71882993 |
| Nkiras1     | 886.230221 | 0.16855166 | 0.22539439 | 0.74780769 | 0.45457616 | 0.72518943 |
| Lrpap1      | 8984.27507 | 0.16844167 | 0.23118744 | 0.72859353 | 0.46625034 | 0.73498824 |
| Kctd6       | 2957.00864 | 0.16843516 | 0.1613771  | 1.04373647 | 0.29660733 | 0.59122008 |
| Rbm15b      | 3256.96439 | 0.16831319 | 0.22819686 | 0.73757892 | 0.46077037 | 0.73116428 |
| Shroom3     | 3996.58517 | 0.16831211 | 0.25353451 | 0.66386273 | 0.50677817 | 0.76210302 |
| Slco1a5     | 2.7926663  | 0.16826507 | 0.36795451 | 0.45729858 | 0.64745645 | NA         |
| 4833428L15F | 2.62091447 | 0.16819964 | 0.33349344 | 0.50435668 | 0.61401076 | NA         |
| Papolb      | 297.124535 | 0.16811775 | 0.32831492 | 0.51206247 | 0.60860729 | 0.82562526 |
| Trim34a     | 259.489096 | 0.16810618 | 0.41900488 | 0.4012034  | 0.68827038 | 0.8714925  |
| Man2b2      | 2178.95627 | 0.16809287 | 0.21378519 | 0.78626994 | 0.43170936 | 0.70705763 |
| Pdcd1       | 1.28223529 | 0.16808854 | 0.22742995 | 0.73907829 | 0.45985946 | NA         |
| Wdr54       | 115.508759 | 0.16794719 | 0.331192   | 0.50709918 | 0.61208523 | 0.82733919 |
| Sbson       | 2.79520496 | 0.1679108  | 0.32731594 | 0.51299303 | 0.6079562  | NA         |
| Fam129a     | 5798.74261 | 0.16782362 | 0.24758852 | 0.67783281 | 0.49787771 | 0.75642242 |
| Txnl4a      | 13078.4658 | 0.16779266 | 0.18298047 | 0.91699764 | 0.35914388 | 0.65015497 |
| Arhgap8     | 923.034576 | 0.16770713 | 0.38836163 | 0.43183239 | 0.66586323 | 0.85846785 |
| Traf6       | 2709.08987 | 0.16769127 | 0.22147498 | 0.75715673 | 0.44895597 | 0.72177342 |
| Tns4        | 33.6137695 | 0.16764562 | 0.42347649 | 0.3958794  | 0.692194   | 0.87436511 |
| Abcd1       | 730.437021 | 0.16762325 | 0.27587587 | 0.6076039  | 0.54345022 | 0.78603486 |
| Nptxr       | 16.4402076 | 0.16756161 | 0.43191103 | 0.38795399 | 0.69805009 | 0.87663546 |
| Supt7l      | 1590.48072 | 0.1674193  | 0.2096481  | 0.79857297 | 0.42453807 | 0.70293777 |
| Irgq        | 1081.93567 | 0.16733989 | 0.23678819 | 0.70670705 | 0.47974855 | 0.74388599 |
| Mirlet7bhg  | 1.88642322 | 0.16721012 | 0.24005407 | 0.69655193 | 0.48608325 | NA         |
| Trex2       | 10.5391277 | 0.16703776 | 0.40340773 | 0.41406684 | 0.67882516 | 0.86604267 |
| Mir7063     | 3.45711856 | 0.16703661 | 0.33573891 | 0.49751937 | 0.61882285 | NA         |
| Gspt2       | 994.967192 | 0.16690285 | 0.17404793 | 0.95894761 | 0.33758514 | 0.63083231 |
| Akap8l      | 3857.96279 | 0.16683376 | 0.20997133 | 0.79455493 | 0.42687244 | 0.70402942 |
| Olig2       | 1722.57663 | 0.16665902 | 0.30651282 | 0.54372609 | 0.58662998 | 0.81285599 |
| Pla2g10os   | 8.02780359 | 0.16648657 | 0.42406753 | 0.39259447 | 0.69461902 | 0.87496374 |
| 2410131K14F | 1190.26329 | 0.1664574  | 0.19038449 | 0.87432228 | 0.38194277 | 0.67083714 |
| Tjp2        | 13822.6887 | 0.16637267 | 0.22053102 | 0.75441847 | 0.45059799 | 0.72293741 |
| Stab1       | 11.4426953 | 0.16632331 | 0.430032   | 0.38676962 | 0.69892677 | 0.87724054 |
| 6720468P15F | 6.7629911  | 0.16626894 | 0.41110541 | 0.40444357 | 0.68588657 | 0.87014375 |
| Dnajc9      | 4706.78517 | 0.16621544 | 0.15942806 | 1.04257328 | 0.29714597 | 0.59143953 |
| Rhoj        | 1.12930968 | 0.16619623 | 0.19723094 | 0.84264786 | 0.39942542 | NA         |
| Unc5a       | 44.6832567 | 0.1661701  | 0.42103454 | 0.39467094 | 0.69308576 | 0.87461511 |
| Unc45a      | 1834.83061 | 0.16615253 | 0.2141787  | 0.77576586 | 0.43788725 | 0.71185287 |
| Atp8a2      | 16.4337492 | 0.16604639 | 0.43120695 | 0.38507354 | 0.70018293 | 0.87785127 |

|              |            |            |            |            |            |            |
|--------------|------------|------------|------------|------------|------------|------------|
| Nap1l4       | 13950.4842 | 0.16603966 | 0.13969872 | 1.18855534 | 0.23461469 | 0.5263048  |
| Ido1         | 1.82877699 | 0.16596995 | 0.30145993 | 0.55055393 | 0.5819395  | NA         |
| Il12rb2      | 1.82877699 | 0.16596995 | 0.30145993 | 0.55055393 | 0.5819395  | NA         |
| Otud7b       | 3175.90101 | 0.16584902 | 0.16849846 | 0.98427617 | 0.32497974 | 0.6188465  |
| Capza2       | 16046.8425 | 0.16582857 | 0.16619142 | 0.9978167  | 0.31836825 | 0.61236174 |
| Tomm7        | 10135.1876 | 0.16581036 | 0.19954971 | 0.83092259 | 0.40601736 | 0.68991262 |
| Nme3         | 1008.86617 | 0.16577823 | 0.20442501 | 0.81094888 | 0.41739503 | 0.69868745 |
| Piga         | 5822.5475  | 0.16574813 | 0.19595228 | 0.84585964 | 0.39763105 | 0.68379525 |
| Jak1         | 5641.75329 | 0.1656648  | 0.23075221 | 0.71793373 | 0.47279815 | 0.73930088 |
| Timp2        | 147.161013 | 0.16563531 | 0.3969654  | 0.41725377 | 0.6764928  | 0.8645032  |
| Olfr1372-ps1 | 47.9827542 | 0.16562148 | 0.40028156 | 0.41376245 | 0.67904809 | 0.86604267 |
| Mcoln3       | 10.0247079 | 0.1655481  | 0.42192309 | 0.39236559 | 0.6947881  | 0.875083   |
| Mir7028      | 1.04872574 | 0.1655196  | 0.19693796 | 0.84046569 | 0.40064733 | NA         |
| Rabl2        | 531.014752 | 0.16548025 | 0.19462618 | 0.8502466  | 0.395188   | 0.68239513 |
| Zrsr2        | 6117.90866 | 0.1654459  | 0.18876316 | 0.87647346 | 0.3807727  | 0.66978428 |
| S100a11      | 1661.13303 | 0.16520288 | 0.24597048 | 0.67163705 | 0.50181478 | 0.75882164 |
| Traf2        | 1057.71376 | 0.16517588 | 0.18507778 | 0.89246733 | 0.3721425  | 0.66226853 |
| Nit1         | 1628.86533 | 0.1650763  | 0.1873166  | 0.88126894 | 0.37817228 | 0.66769396 |
| Gp1bb        | 2.67721464 | 0.16504391 | 0.35971285 | 0.45882129 | 0.6463625  | NA         |
| Eif5         | 29261.6708 | 0.16502125 | 0.20649458 | 0.79915538 | 0.42420032 | 0.70280233 |
| Zzef1        | 2079.82139 | 0.16493439 | 0.27214297 | 0.6060579  | 0.54447631 | 0.78623679 |
| C330024D21l  | 766.19626  | 0.1649232  | 0.32534722 | 0.50691443 | 0.61221486 | 0.82744249 |
| Cul3         | 10378.4996 | 0.16490222 | 0.19391674 | 0.85037642 | 0.39511584 | 0.68239513 |
| Wipi1        | 887.867269 | 0.16483184 | 0.23173155 | 0.71130514 | 0.47689517 | 0.7420212  |
| Capns2       | 1.28193157 | 0.16481892 | 0.28511189 | 0.57808505 | 0.5632067  | NA         |
| Slc25a44     | 1831.28749 | 0.16451912 | 0.25703434 | 0.6400667  | 0.52212924 | 0.77084692 |
| G630025P09l  | 29.3194471 | 0.16449468 | 0.41461693 | 0.39673894 | 0.69155998 | 0.87391917 |
| Nme2         | 32617.2386 | 0.1643428  | 0.20438849 | 0.80407075 | 0.42135611 | 0.70108061 |
| Twsg1        | 5655.14177 | 0.16427859 | 0.24080989 | 0.68219205 | 0.49511752 | 0.75514952 |
| Lamtor3      | 1687.88558 | 0.16426314 | 0.17224265 | 0.95367288 | 0.34024925 | 0.6336027  |
| Riad1        | 14.1108385 | 0.16425017 | 0.43147012 | 0.38067567 | 0.70344393 | 0.87928906 |
| Mirlet7f-1   | 4.24241421 | 0.16417476 | 0.36992301 | 0.44380791 | 0.65718147 | NA         |
| E230008N13l  | 1.81622716 | 0.1641716  | 0.3012517  | 0.5449649  | 0.58577766 | NA         |
| Tatdn3       | 468.388397 | 0.16416099 | 0.30882293 | 0.53156995 | 0.59502388 | 0.81807236 |
| Senp3        | 23725.3918 | 0.1641145  | 0.1578237  | 1.0398597  | 0.29840509 | 0.59295905 |
| Rab24        | 2389.36728 | 0.16406887 | 0.22797941 | 0.71966532 | 0.47173108 | 0.73859646 |
| Aebp1        | 151.808382 | 0.16400582 | 0.30452226 | 0.53856759 | 0.59018526 | 0.81538476 |
| Dgkg         | 35.1080908 | 0.16390728 | 0.40356764 | 0.40614574 | 0.68463552 | 0.86933674 |
| Hoxa13       | 14.8028402 | 0.16381369 | 0.42892796 | 0.38191423 | 0.70252498 | 0.87879687 |
| Elovl1       | 1125.55693 | 0.16374257 | 0.20191324 | 0.81095509 | 0.41739146 | 0.69868745 |
| Polg         | 4965.76722 | 0.16363585 | 0.17260641 | 0.94802884 | 0.34311477 | 0.63670595 |

|             |            |            |            |            |            |            |
|-------------|------------|------------|------------|------------|------------|------------|
| Aar2        | 1979.37494 | 0.16355325 | 0.2098919  | 0.77922612 | 0.43584653 | 0.70987111 |
| Gamt        | 170.239371 | 0.16353444 | 0.27936273 | 0.58538388 | 0.55828962 | 0.79658335 |
| Mia2        | 1.9341827  | 0.16346532 | 0.28425837 | 0.57505895 | 0.56525143 | NA         |
| Snrpg       | 5000.32103 | 0.16346325 | 0.19466843 | 0.83970089 | 0.40107612 | 0.68630443 |
| Gm6525      | 1.30163714 | 0.16343463 | 0.28221909 | 0.57910549 | 0.56251799 | NA         |
| 2310069G16l | 2.68260872 | 0.16340733 | 0.35773863 | 0.45677853 | 0.64783024 | NA         |
| Copz1       | 14590.7    | 0.163375   | 0.18290184 | 0.89323865 | 0.37172938 | 0.6617932  |
| Mettl6      | 3004.96382 | 0.16332285 | 0.16298513 | 1.00207208 | 0.31630878 | 0.61089392 |
| Tex21       | 321.978532 | 0.16327366 | 0.32060179 | 0.50927244 | 0.61056128 | 0.82628478 |
| Nrp         | 74.3029771 | 0.16327134 | 0.35038312 | 0.46597947 | 0.6412302  | 0.84346082 |
| Abr         | 6822.99037 | 0.16320713 | 0.20869583 | 0.78203348 | 0.4341949  | 0.70859113 |
| Cideb       | 39.294107  | 0.16320523 | 0.42955718 | 0.3799383  | 0.70399122 | 0.87942876 |
| 1700029J03R | 0.9413954  | 0.16311608 | 0.23880399 | 0.68305422 | 0.49457258 | NA         |
| Slc24a3     | 0.9413954  | 0.16311608 | 0.23880399 | 0.68305422 | 0.49457258 | NA         |
| Mir1930     | 0.9413954  | 0.16311608 | 0.23880399 | 0.68305422 | 0.49457258 | NA         |
| C130060K24f | 2.54399459 | 0.16306202 | 0.32063866 | 0.50855383 | 0.611065   | NA         |
| Oscp1       | 179.023776 | 0.16302466 | 0.29933542 | 0.544622   | 0.58601352 | 0.81258103 |
| Cldn13      | 2.70200399 | 0.1629772  | 0.29276855 | 0.55667591 | 0.57774888 | NA         |
| Ccp110      | 6836.03306 | 0.16292361 | 0.21821781 | 0.74661007 | 0.45529897 | 0.72574357 |
| Maml3       | 19.5666473 | 0.16280304 | 0.4204162  | 0.38724254 | 0.69857666 | 0.87701346 |
| Ppp1r15a    | 2478.67168 | 0.16279587 | 0.21823761 | 0.74595698 | 0.4556934  | 0.7260746  |
| Six3        | 4.85460178 | 0.16279315 | 0.39153298 | 0.41578401 | 0.67756806 | NA         |
| Chat        | 1.95388827 | 0.16273981 | 0.28237273 | 0.57632978 | 0.5643923  | NA         |
| Stambp      | 535.565472 | 0.16261549 | 0.2359757  | 0.68911966 | 0.49074797 | 0.75166175 |
| A230103J11R | 4.69700456 | 0.16246968 | 0.40595765 | 0.40021336 | 0.68899938 | NA         |
| Gltpd1      | 624.800038 | 0.16230011 | 0.19361907 | 0.83824444 | 0.40189343 | 0.68675204 |
| Dnaaf2      | 2016.95807 | 0.16215337 | 0.1566597  | 1.03506753 | 0.30063738 | 0.59549253 |
| Mslnl       | 45.3668493 | 0.16203259 | 0.42702264 | 0.3794473  | 0.70435573 | 0.87942876 |
| Ubfd1       | 9300.3991  | 0.16199039 | 0.20700748 | 0.78253399 | 0.43390082 | 0.70858066 |
| Vipr1       | 31.1799026 | 0.16191747 | 0.4187326  | 0.38668466 | 0.69898967 | 0.87724868 |
| Sdk1        | 19.5957183 | 0.16182882 | 0.4322142  | 0.3744181  | 0.70809328 | 0.88119581 |
| Dll4        | 5.71726111 | 0.16180745 | 0.39637008 | 0.40822316 | 0.68310984 | NA         |
| Chmp1b      | 3354.82857 | 0.16179567 | 0.16203699 | 0.99851072 | 0.31803177 | 0.61194161 |
| Rbfa        | 2728.92024 | 0.16177564 | 0.22227485 | 0.72781799 | 0.46672501 | 0.73543831 |
| 2610307P16f | 2.34023656 | 0.16171217 | 0.31485247 | 0.51361253 | 0.60752292 | NA         |
| C920006O11l | 235.488805 | 0.16168598 | 0.32755817 | 0.49360999 | 0.62158165 | 0.83196874 |
| Wnt9a       | 70.2182671 | 0.16152632 | 0.36307164 | 0.44488829 | 0.65640048 | 0.85271673 |
| Itgbl1      | 1.97528183 | 0.16148501 | 0.24099839 | 0.67006678 | 0.50281522 | NA         |
| Uqcrq       | 8056.85302 | 0.16146216 | 0.23100387 | 0.69895867 | 0.48457786 | 0.74712338 |
| Tle3        | 8343.71161 | 0.16145314 | 0.20920439 | 0.77174834 | 0.44026349 | 0.71437162 |
| Ank         | 1671.65847 | 0.16115061 | 0.24095321 | 0.66880458 | 0.50362014 | 0.75985222 |

|             |            |            |            |            |            |            |
|-------------|------------|------------|------------|------------|------------|------------|
| Gpr111      | 5.6475156  | 0.16113017 | 0.39864079 | 0.40419891 | 0.68606645 | NA         |
| Plbd2       | 3477.07841 | 0.16112207 | 0.18786937 | 0.85762816 | 0.39109782 | 0.67916942 |
| Sgsm2       | 1702.47215 | 0.16106089 | 0.20701502 | 0.7780155  | 0.43655988 | 0.7104377  |
| Agxt        | 0.92884557 | 0.16099713 | 0.23807325 | 0.6762504  | 0.49888168 | NA         |
| Asb18       | 3.21177556 | 0.16089301 | 0.34881426 | 0.46125697 | 0.64461425 | NA         |
| Slc10a3     | 462.067939 | 0.16081355 | 0.21875361 | 0.73513553 | 0.46225696 | 0.7324053  |
| Mtss1l      | 2098.09706 | 0.16075262 | 0.19630684 | 0.81888444 | 0.41285235 | 0.69515344 |
| Arhgef19    | 471.11159  | 0.16074583 | 0.26148882 | 0.61473311 | 0.53873099 | 0.78260679 |
| Foxi3       | 15.759578  | 0.16064088 | 0.4291153  | 0.37435366 | 0.70814122 | 0.88119581 |
| Uckl1       | 1181.12151 | 0.16060364 | 0.24889348 | 0.64527056 | 0.51875187 | 0.76880876 |
| Chmp7       | 4432.6671  | 0.16060239 | 0.17609345 | 0.91202933 | 0.36175328 | 0.65254528 |
| Mpped2      | 496.616751 | 0.16058442 | 0.30336861 | 0.52933764 | 0.59657125 | 0.81955304 |
| Samd5       | 2.67437176 | 0.16056033 | 0.32942192 | 0.48740024 | 0.62597472 | NA         |
| Map7d1      | 2129.78045 | 0.16055575 | 0.24930045 | 0.64402511 | 0.51955915 | 0.76956514 |
| Tmem167     | 6296.75056 | 0.16051533 | 0.17860488 | 0.8987175  | 0.36880315 | 0.65913197 |
| Dnajb2      | 919.599019 | 0.16042893 | 0.20458346 | 0.7841735  | 0.43293831 | 0.70817541 |
| 1600015110R | 0.94855114 | 0.16031212 | 0.23655856 | 0.67768471 | 0.49797162 | NA         |
| Tspan31     | 6017.93323 | 0.16014185 | 0.17603618 | 0.90970986 | 0.36297554 | 0.65337545 |
| Mir677      | 33.8839555 | 0.16013847 | 0.39383088 | 0.40661736 | 0.68428905 | 0.86903871 |
| Mgat1       | 1327.13456 | 0.15998957 | 0.26105237 | 0.61286388 | 0.53996635 | 0.78381188 |
| Stard7      | 5465.78338 | 0.15997234 | 0.18125893 | 0.88256254 | 0.37747267 | 0.66728175 |
| Fbf1        | 1633.91842 | 0.15988114 | 0.2232863  | 0.71603652 | 0.4739688  | 0.74015587 |
| Igfn1       | 0.92168982 | 0.15979135 | 0.23764997 | 0.67238114 | 0.50134109 | NA         |
| Aknad1      | 0.92168982 | 0.15979135 | 0.23764997 | 0.67238114 | 0.50134109 | NA         |
| Trpv2       | 139.418877 | 0.15971698 | 0.3384401  | 0.47192097 | 0.6369832  | 0.84089352 |
| Vasp        | 9817.46687 | 0.15966346 | 0.17134617 | 0.93181805 | 0.35143057 | 0.64355826 |
| Pde1b       | 1771.44788 | 0.1596135  | 0.31296088 | 0.51001104 | 0.61004373 | 0.82596711 |
| AW011738    | 2.38562103 | 0.1595855  | 0.33045427 | 0.48292763 | 0.62914712 | NA         |
| Tecpr2      | 1875.09671 | 0.1595747  | 0.21944694 | 0.72716759 | 0.4671233  | 0.73569317 |
| Anapc16     | 1849.11931 | 0.15947984 | 0.16133818 | 0.98848169 | 0.3229168  | 0.61736896 |
| Ndufa1      | 3023.18252 | 0.15945212 | 0.21159626 | 0.75356775 | 0.45110882 | 0.72303079 |
| Cck         | 4.16416099 | 0.15945041 | 0.32264094 | 0.49420389 | 0.62116219 | NA         |
| Fscn3       | 1.83555535 | 0.15923223 | 0.30131879 | 0.52845107 | 0.5971863  | NA         |
| Csnk1g1     | 3460.71133 | 0.15913667 | 0.2355797  | 0.67551097 | 0.49935119 | 0.75708397 |
| Rab11fip5   | 7724.14469 | 0.15906794 | 0.20798752 | 0.76479562 | 0.44439326 | 0.71777727 |
| G3bp2       | 43094.0788 | 0.15899869 | 0.22618811 | 0.7029489  | 0.48208759 | 0.74506279 |
| 9230116L04F | 2.52150726 | 0.15896626 | 0.3370488  | 0.47164168 | 0.63718257 | NA         |
| Clgn        | 1899.27856 | 0.158813   | 0.4172586  | 0.38061049 | 0.7034923  | 0.87928906 |
| Ccdc172     | 263.413101 | 0.15865574 | 0.394568   | 0.40209987 | 0.68761053 | 0.87089586 |
| S1pr5       | 32.0942647 | 0.15853729 | 0.4302342  | 0.36849067 | 0.7125074  | 0.88374769 |
| Srprb       | 2630.37414 | 0.15847314 | 0.15473993 | 1.02412571 | 0.3057759  | 0.60009099 |

|             |            |            |            |            |            |            |
|-------------|------------|------------|------------|------------|------------|------------|
| Hilpda      | 742.302078 | 0.15834982 | 0.22648144 | 0.6991735  | 0.48444361 | 0.74712338 |
| Cdk9        | 6227.30859 | 0.15832948 | 0.15114061 | 1.04756412 | 0.29483948 | 0.58933788 |
| Letm2       | 71.439666  | 0.15829912 | 0.33000099 | 0.47969288 | 0.63144579 | 0.83751629 |
| 2900011O08I | 1695.17173 | 0.15824745 | 0.32541597 | 0.48629284 | 0.62675955 | 0.83469537 |
| Laptm4a     | 11832.93   | 0.15809374 | 0.157913   | 1.00114454 | 0.31675694 | 0.61130393 |
| Mir3076     | 1.28637263 | 0.15803251 | 0.22550981 | 0.70077888 | 0.48344102 | NA         |
| Rhobtb3     | 2347.93044 | 0.15802087 | 0.35519838 | 0.44488061 | 0.65640604 | 0.85271673 |
| Zfp57       | 35356.1189 | 0.15798248 | 0.1723885  | 0.91643284 | 0.35943992 | 0.65018613 |
| Dux         | 4.77058963 | 0.15791341 | 0.35777109 | 0.44138114 | 0.6589371  | NA         |
| Tmem129     | 758.940689 | 0.15787144 | 0.22458279 | 0.70295432 | 0.48208421 | 0.74506279 |
| Snapc1      | 1444.25884 | 0.15784414 | 0.26755522 | 0.58994978 | 0.55522432 | 0.7945425  |
| 1700095B10F | 1.46137951 | 0.1578363  | 0.26412708 | 0.5975771  | 0.55012215 | NA         |
| Pcdh17      | 1.74218494 | 0.15783352 | 0.29657736 | 0.53218331 | 0.59459904 | NA         |
| Jarid2      | 17951.5966 | 0.15782835 | 0.2021056  | 0.78092022 | 0.43484942 | 0.709064   |
| Fitm2       | 390.642683 | 0.15782042 | 0.2456938  | 0.64234595 | 0.52064859 | 0.76986886 |
| Tmprss2     | 23.682395  | 0.15753833 | 0.43156851 | 0.36503666 | 0.71508404 | 0.88470138 |
| Rbpms2      | 14788.6154 | 0.15752568 | 0.17593262 | 0.89537503 | 0.37058665 | 0.6608179  |
| Tspan3      | 4176.94704 | 0.15745501 | 0.1601408  | 0.98322856 | 0.32549496 | 0.61910129 |
| Onecut1     | 6.21867112 | 0.1574308  | 0.40444053 | 0.38925574 | 0.69708697 | 0.87645821 |
| 4931409K22F | 25.1183862 | 0.15727487 | 0.43210508 | 0.36397367 | 0.71587767 | 0.88472721 |
| Synb        | 2.47521168 | 0.15708457 | 0.24747737 | 0.63474317 | 0.52559594 | NA         |
| Parp11      | 761.19164  | 0.15704686 | 0.22466492 | 0.6990271  | 0.4845351  | 0.74712338 |
| Ube2f       | 2049.7227  | 0.15699341 | 0.17830026 | 0.88050019 | 0.3785884  | 0.66771292 |
| Atp6v1f     | 5312.81932 | 0.15695867 | 0.23193196 | 0.67674447 | 0.4985681  | 0.75683128 |
| Akap6       | 17.8536773 | 0.15694978 | 0.43223237 | 0.36311436 | 0.71651946 | 0.88475417 |
| Fcna        | 5.58751729 | 0.1568269  | 0.37492981 | 0.41828335 | 0.67573996 | NA         |
| Trim23      | 2939.3007  | 0.15676817 | 0.21467571 | 0.73025576 | 0.46523387 | 0.73427909 |
| Rxfp2       | 9.59023395 | 0.15667135 | 0.42603979 | 0.36773878 | 0.71306802 | 0.88397496 |
| Mgat4c      | 40.2157647 | 0.15656219 | 0.42634512 | 0.36721937 | 0.71345539 | 0.88418475 |
| 2810403D21I | 65.3938217 | 0.15655794 | 0.35703267 | 0.43849752 | 0.66102567 | 0.85541281 |
| Blzf1       | 2178.3257  | 0.15654242 | 0.16789786 | 0.932367   | 0.35114689 | 0.64318216 |
| Mir6976     | 0.62971883 | 0.15651483 | 0.19265504 | 0.81240975 | 0.41655655 | NA         |
| 2210407C18F | 0.62971883 | 0.15651483 | 0.19265504 | 0.81240975 | 0.41655655 | NA         |
| Olf1389     | 0.62971883 | 0.15651483 | 0.19265504 | 0.81240975 | 0.41655655 | NA         |
| Pdxdc1      | 9424.79752 | 0.15651431 | 0.16841463 | 0.92933915 | 0.35271335 | 0.64439796 |
| Prorsd1     | 1098.19026 | 0.15641235 | 0.18513812 | 0.84484144 | 0.39819938 | 0.68409175 |
| Tnfrsf9     | 27.8298205 | 0.15640915 | 0.41584893 | 0.37612012 | 0.7068276  | 0.88068873 |
| Slc4a11     | 2035.39376 | 0.1563928  | 0.20159041 | 0.77579483 | 0.43787014 | 0.71185287 |
| AU019990    | 8.59391372 | 0.1563183  | 0.42803162 | 0.36520269 | 0.71496011 | 0.88465505 |
| Rassf8      | 224.440981 | 0.15629055 | 0.31982271 | 0.48867871 | 0.62506918 | 0.83380089 |
| Aicda       | 16.6529763 | 0.15620525 | 0.42934698 | 0.36382055 | 0.71599201 | 0.88472721 |

|             |            |            |            |            |            |            |
|-------------|------------|------------|------------|------------|------------|------------|
| Olfr1393    | 0.96347665 | 0.15610775 | 0.23951104 | 0.65177683 | 0.51454515 | NA         |
| Wnt2        | 0.96347665 | 0.15610775 | 0.23951104 | 0.65177683 | 0.51454515 | NA         |
| Duoxa2      | 0.96347665 | 0.15610775 | 0.23951104 | 0.65177683 | 0.51454515 | NA         |
| Fntb        | 6587.01242 | 0.15601015 | 0.22871291 | 0.68212217 | 0.49516171 | 0.75514952 |
| Ttc30a2     | 10.9188733 | 0.15600774 | 0.4318412  | 0.36126182 | 0.71790373 | 0.88547913 |
| Deptor      | 5384.14268 | 0.15600441 | 0.27303013 | 0.57138167 | 0.56774095 | 0.80306738 |
| A230065H16  | 3.55127617 | 0.15593182 | 0.37293236 | 0.41812361 | 0.67585674 | NA         |
| Tpst2       | 2974.06693 | 0.15591079 | 0.17267501 | 0.90291461 | 0.36657121 | 0.65694132 |
| Bri3        | 831.082662 | 0.15589382 | 0.22774974 | 0.68449616 | 0.49366192 | 0.75389732 |
| Eif4e2      | 13577.2052 | 0.15583182 | 0.19917208 | 0.7823979  | 0.43398077 | 0.70858066 |
| Imp4        | 5404.71537 | 0.15558073 | 0.19961385 | 0.77940849 | 0.43573913 | 0.70987111 |
| Adamts4     | 195.091316 | 0.15549739 | 0.30337074 | 0.51256555 | 0.60825526 | 0.82562526 |
| Taz         | 1534.16353 | 0.15542282 | 0.22319811 | 0.69634469 | 0.48621299 | 0.7479571  |
| Twist2      | 2.37571222 | 0.155406   | 0.3270161  | 0.4752243  | 0.63462711 | NA         |
| Rep15       | 5.65793894 | 0.15539887 | 0.40764444 | 0.38121179 | 0.7030461  | NA         |
| Mc1r        | 7.23913271 | 0.15536191 | 0.41405357 | 0.37522176 | 0.70749555 | 0.88112271 |
| Peo1        | 3495.79592 | 0.15529134 | 0.1756253  | 0.88421963 | 0.37657767 | 0.66655796 |
| Sh3glb2     | 2346.83007 | 0.15527241 | 0.17715985 | 0.87645375 | 0.38078341 | 0.66978428 |
| Btg3        | 0.62256309 | 0.15524721 | 0.1919502  | 0.808789   | 0.41863652 | NA         |
| 1700029F12F | 0.62256309 | 0.15524721 | 0.1919502  | 0.808789   | 0.41863652 | NA         |
| Ppil2       | 6635.37325 | 0.15521203 | 0.1642981  | 0.94469763 | 0.34481327 | 0.63773152 |
| Terf2ip     | 1790.37299 | 0.15519256 | 0.20283604 | 0.76511337 | 0.44420404 | 0.71760126 |
| Micalcl     | 1.45422376 | 0.15518672 | 0.26265972 | 0.59082802 | 0.55463566 | NA         |
| Brca2       | 7833.0921  | 0.1551216  | 0.27170094 | 0.57092774 | 0.56804862 | 0.80306738 |
| Kcnv1       | 2.74792815 | 0.15507268 | 0.29286653 | 0.52949948 | 0.596459   | NA         |
| Bud31       | 5181.5209  | 0.15487566 | 0.18230786 | 0.84952813 | 0.39558749 | 0.68266819 |
| Gm6607      | 2.83821375 | 0.15483791 | 0.32585215 | 0.47517842 | 0.63465981 | NA         |
| Cgrrf1      | 143.135581 | 0.15477315 | 0.31798396 | 0.48673257 | 0.62644786 | 0.83466421 |
| Tob2        | 1659.87688 | 0.15463539 | 0.26324308 | 0.58742434 | 0.55691875 | 0.7957956  |
| Dnajb14     | 491.236189 | 0.15462294 | 0.20461475 | 0.75567838 | 0.44984205 | 0.72252568 |
| Fchsd2      | 1913.2663  | 0.15462125 | 0.21282547 | 0.72651669 | 0.46752208 | 0.735927   |
| Gramd4      | 863.341887 | 0.1544078  | 0.26022207 | 0.59336936 | 0.55293399 | 0.79208943 |
| Ttyh2       | 3425.972   | 0.15432645 | 0.24203079 | 0.6376315  | 0.52371359 | 0.77166962 |
| Tmsb15b1    | 69.9397059 | 0.15431449 | 0.36709963 | 0.42036133 | 0.67422152 | 0.86375836 |
| Col8a1      | 14.116473  | 0.15414437 | 0.18976333 | 0.81229798 | NA         | NA         |
| Slc35b2     | 2307.61041 | 0.15408716 | 0.1925813  | 0.80011488 | 0.42364424 | 0.70243716 |
| Serp1       | 9924.37003 | 0.15405022 | 0.18672384 | 0.82501635 | 0.40936231 | 0.69272876 |
| Zfp865      | 980.344589 | 0.15399577 | 0.22684331 | 0.67886406 | 0.497224   | 0.75614418 |
| Nkx6-1      | 1.57427995 | 0.15398653 | 0.30050588 | 0.51242434 | 0.60835406 | NA         |
| Nos1        | 697.561713 | 0.15392197 | 0.38156408 | 0.40339743 | 0.68665588 | 0.87055301 |
| Galnt14     | 0.90914    | 0.15382122 | 0.2342741  | 0.65658656 | 0.51144679 | NA         |

|             |            |            |            |            |            |            |
|-------------|------------|------------|------------|------------|------------|------------|
| Tmem248     | 7176.8291  | 0.15380778 | 0.17973916 | 0.85572773 | 0.3921484  | 0.68008249 |
| Gm648       | 11.4109638 | 0.15379855 | 0.43160332 | 0.35634238 | 0.72158417 | 0.88692345 |
| Gm10125     | 1.64697921 | 0.15377944 | 0.2394504  | 0.64221837 | 0.52073141 | NA         |
| Mir7036b    | 3.25203738 | 0.15358455 | 0.35571876 | 0.43175835 | 0.66591705 | NA         |
| Gm7609      | 0.97063239 | 0.1534162  | 0.23724298 | 0.64666277 | 0.51785023 | NA         |
| Dppa5a      | 114086.724 | 0.15339161 | 0.26176415 | 0.58599168 | 0.5578811  | 0.79640795 |
| Slc38a1     | 8582.02762 | 0.15332312 | 0.20791623 | 0.73742741 | 0.46086247 | 0.73116428 |
| Nostrin     | 5.48539824 | 0.15322898 | 0.37706112 | 0.40637702 | 0.6844656  | NA         |
| Gnaq        | 2292.82571 | 0.15322862 | 0.20515484 | 0.74689254 | 0.45512843 | 0.72562049 |
| Gm5878      | 23.2801136 | 0.15311177 | 0.4305919  | 0.35558442 | 0.72215181 | 0.8872265  |
| Fabp1       | 0.61001326 | 0.15302128 | 0.19070392 | 0.80240239 | 0.42232023 | NA         |
| Mir494      | 0.61001326 | 0.15302128 | 0.19070392 | 0.80240239 | 0.42232023 | NA         |
| Hamp        | 0.61001326 | 0.15302128 | 0.19070392 | 0.80240239 | 0.42232023 | NA         |
| 9230102004l | 0.61001326 | 0.15302128 | 0.19070392 | 0.80240239 | 0.42232023 | NA         |
| Rpusd3      | 999.266275 | 0.1529606  | 0.20212937 | 0.75674604 | 0.44920202 | 0.7220415  |
| Csmd1       | 4.56287998 | 0.15293596 | 0.39652493 | 0.38569066 | 0.69972578 | NA         |
| Usp46       | 6875.76073 | 0.15292205 | 0.16595421 | 0.92147136 | 0.35680439 | 0.64797736 |
| Rbck1       | 5031.16156 | 0.15291001 | 0.17415524 | 0.87800983 | 0.37993838 | 0.66890318 |
| Mfge8       | 13622.7906 | 0.15290765 | 0.32018456 | 0.47756099 | 0.6329627  | 0.83857582 |
| Ccdc71      | 3391.31668 | 0.15288766 | 0.18772796 | 0.81441069 | 0.41540972 | 0.69773996 |
| Psmb11      | 1.96375869 | 0.15288184 | 0.33667134 | 0.45409818 | 0.64975816 | NA         |
| Acer2       | 2123.71859 | 0.15286453 | 0.19083787 | 0.80101781 | 0.42312134 | 0.70209373 |
| Ceacam19    | 30.013627  | 0.15285615 | 0.42476854 | 0.3598575  | 0.7189537  | 0.88576059 |
| Pou5f2      | 0.94377108 | 0.15281889 | 0.23839535 | 0.64103133 | 0.52150233 | NA         |
| Mir5098     | 0.94377108 | 0.15281889 | 0.23839535 | 0.64103133 | 0.52150233 | NA         |
| Hps6        | 630.310255 | 0.15280798 | 0.20830854 | 0.7335656  | 0.46321353 | 0.73297798 |
| Snord83b    | 113.46374  | 0.15265595 | 0.31741935 | 0.4809283  | 0.63056746 | 0.83704264 |
| Cyb561d2    | 412.607899 | 0.15254406 | 0.23696753 | 0.64373402 | 0.51974792 | 0.76969812 |
| Spred1      | 2239.95796 | 0.15254368 | 0.26032107 | 0.58598286 | 0.55788704 | 0.79640795 |
| Samd1       | 5328.75657 | 0.15252957 | 0.19205994 | 0.7941769  | 0.42709245 | 0.70409358 |
| Capn8       | 1.59398552 | 0.1525206  | 0.29704648 | 0.51345701 | 0.60763167 | NA         |
| Zfp362      | 383.036651 | 0.1523739  | 0.32517011 | 0.4685975  | 0.63935737 | 0.84236323 |
| Mpdu1       | 5909.00612 | 0.15235792 | 0.20213886 | 0.75372899 | 0.45101197 | 0.7229937  |
| Xylt1       | 113.494835 | 0.15234325 | 0.41596757 | 0.36623829 | 0.71418728 | 0.88425449 |
| Spryd3      | 1147.83245 | 0.1523402  | 0.19251049 | 0.79133454 | 0.42874879 | 0.7048133  |
| Sra1        | 3724.71246 | 0.1523163  | 0.21190803 | 0.71878493 | 0.47227344 | 0.73886562 |
| Erh         | 1859.14145 | 0.15229844 | 0.19217199 | 0.79251112 | 0.42806271 | 0.70472095 |
| Bcdin3d     | 543.112555 | 0.15224219 | 0.23683391 | 0.64282262 | 0.5203392  | 0.76986886 |
| Upp1        | 33951.5748 | 0.15210947 | 0.22972985 | 0.66212321 | 0.50789227 | 0.76297979 |
| Dirc2       | 3131.03383 | 0.15210685 | 0.22907256 | 0.66401164 | 0.50668286 | 0.76203338 |
| Rdh5        | 32.5604707 | 0.1520731  | 0.3883515  | 0.39158623 | 0.69536396 | 0.87541586 |



|             |            |            |            |            |            |            |
|-------------|------------|------------|------------|------------|------------|------------|
| Cerk        | 499.973966 | 0.15194652 | 0.25612256 | 0.59325708 | 0.55300912 | 0.79210139 |
| Plek        | 2.86079991 | 0.1518324  | 0.33312729 | 0.45577892 | 0.64854897 | NA         |
| Ppp4r1      | 6127.88013 | 0.15182453 | 0.19904327 | 0.76277151 | 0.44559968 | 0.71882993 |
| Llph        | 1157.67062 | 0.151769   | 0.20181712 | 0.7520125  | 0.45204354 | 0.72396798 |
| Letm1       | 3056.26939 | 0.15176794 | 0.16342799 | 0.92865333 | 0.35306878 | 0.64466039 |
| Epha4       | 9240.03238 | 0.1517633  | 0.31225988 | 0.48601603 | 0.6269558  | 0.83488523 |
| Sik1        | 5579.58464 | 0.15169742 | 0.20126469 | 0.75372098 | 0.45101678 | 0.7229937  |
| 1700028P15F | 1.28284932 | 0.15166167 | 0.22145698 | 0.68483581 | 0.49344753 | NA         |
| Gpr39       | 2.31443374 | 0.15152159 | 0.25354628 | 0.59760921 | 0.55010072 | NA         |
| Rel         | 238.714666 | 0.15147    | 0.28669946 | 0.52832328 | 0.59727498 | 0.81955501 |
| Macc1       | 1.47569099 | 0.15140672 | 0.25841945 | 0.58589521 | 0.55794594 | NA         |
| D3Bwg0562e  | 1.22725592 | 0.1513197  | 0.22292753 | 0.67878425 | 0.49727457 | NA         |
| Stpg1       | 157.665369 | 0.15131634 | 0.25968241 | 0.5826977  | 0.56009682 | 0.79814554 |
| 1700048O20I | 127.232248 | 0.15131103 | 0.34866629 | 0.4339709  | 0.66430957 | 0.85719825 |
| Fundc2      | 2781.47379 | 0.15130788 | 0.18160905 | 0.83315162 | 0.40475922 | 0.68911875 |
| Mir19a      | 4.19195919 | 0.15130077 | 0.38217535 | 0.3958936  | 0.69218353 | NA         |
| Nxpe3       | 1160.42285 | 0.15127529 | 0.27141602 | 0.55735579 | 0.57728436 | 0.80734073 |
| Foxo1       | 1620.39355 | 0.15125991 | 0.21372493 | 0.70773173 | 0.47911187 | 0.7432908  |
| Mir211      | 1.291463   | 0.15117402 | 0.28156272 | 0.53691065 | 0.59132934 | NA         |
| Camkmt      | 524.368404 | 0.15116916 | 0.21518198 | 0.70251776 | 0.48235633 | 0.74506649 |
| Hmx1        | 16.8597679 | 0.15111313 | 0.43165823 | 0.35007587 | 0.72628176 | 0.88950597 |
| Rgs20       | 5.99068378 | 0.15108642 | 0.40268864 | 0.37519416 | 0.70751608 | 0.88112271 |
| Man2b1      | 5495.98542 | 0.15106733 | 0.21917333 | 0.68925963 | 0.4906599  | 0.75160088 |
| Serpinb6c   | 2617.40644 | 0.15097583 | 0.18477808 | 0.81706568 | 0.41389089 | 0.69620522 |
| Abcb1b      | 4356.46472 | 0.15077927 | 0.28575288 | 0.52765617 | 0.597738   | 0.81972425 |
| Prpf40b     | 2300.45704 | 0.15072737 | 0.21418278 | 0.70373242 | 0.48159943 | 0.74482882 |
| 4930453N24I | 3294.90838 | 0.15062258 | 0.16355583 | 0.92092455 | 0.35708982 | 0.64819701 |
| Gm6588      | 1.94944721 | 0.15045749 | 0.33656904 | 0.44703308 | 0.65485118 | NA         |
| Sec22c      | 1050.07399 | 0.15032752 | 0.19291131 | 0.77925719 | 0.43582823 | 0.70987111 |
| Alg1        | 1533.9941  | 0.15026395 | 0.1795362  | 0.83695627 | 0.40261715 | 0.68712679 |
| BC005537    | 9808.35684 | 0.15022475 | 0.23221586 | 0.64691856 | 0.51768465 | 0.76807205 |
| Wdr60       | 673.667695 | 0.1501589  | 0.20833163 | 0.7207686  | 0.4710519  | 0.73829186 |
| Ccndbp1     | 1795.32162 | 0.15003097 | 0.18681528 | 0.80309794 | 0.42191813 | 0.70127884 |
| Chst4       | 2.48413633 | 0.15003081 | 0.29875448 | 0.50218766 | 0.61553552 | NA         |
| BC048609    | 1.60076388 | 0.15002742 | 0.30085652 | 0.49866766 | 0.61801353 | NA         |
| 5730457N03I | 1.96782237 | 0.14997472 | 0.27632947 | 0.54273877 | 0.58730968 | NA         |
| Gm5434      | 0.94545907 | 0.14996662 | 0.1883856  | 0.796062   | 0.425996   | NA         |
| Atg101      | 3142.46251 | 0.14996436 | 0.20836444 | 0.71972144 | 0.47169652 | 0.73859646 |
| Cox6c       | 12840.3453 | 0.14986718 | 0.20966904 | 0.71477971 | 0.47474517 | 0.74052205 |
| Csdc2       | 29.7463737 | 0.14986195 | 0.40171503 | 0.37305537 | 0.70910723 | 0.88153317 |
| Atp6v0d2    | 4.90755417 | 0.1497602  | 0.37694209 | 0.39730294 | 0.69114408 | NA         |

|             |            |            |            |            |            |            |
|-------------|------------|------------|------------|------------|------------|------------|
| Rrm2b       | 1967.27884 | 0.14958841 | 0.19783451 | 0.75612898 | 0.44957187 | 0.72235184 |
| Hpse2       | 3.25908467 | 0.14955292 | 0.31340207 | 0.47719188 | 0.63322549 | NA         |
| Suds3       | 6329.4659  | 0.1495187  | 0.14876713 | 1.00505202 | 0.3148718  | 0.6093449  |
| Nol6        | 10796.0771 | 0.14949705 | 0.23575574 | 0.63411839 | 0.52600356 | 0.77387714 |
| Hoxb1       | 1.32540639 | 0.14947268 | 0.22258396 | 0.67153389 | 0.50188047 | NA         |
| Sphk2       | 1881.36615 | 0.14941811 | 0.24425251 | 0.61173622 | 0.54071229 | 0.78460548 |
| Phldb1      | 590.181053 | 0.14926777 | 0.31797728 | 0.46942906 | 0.63876298 | 0.84195653 |
| Abt1        | 2423.08536 | 0.14922962 | 0.17363553 | 0.85944174 | 0.39009685 | 0.67839532 |
| Slc6a1      | 890.396422 | 0.14916809 | 0.39775826 | 0.37502197 | 0.70764412 | 0.88112271 |
| Tctex1d4    | 8.20226725 | 0.14910027 | 0.42849004 | 0.34796671 | 0.72786519 | 0.88986097 |
| BC003965    | 3069.71904 | 0.14908858 | 0.2019558  | 0.7382238  | 0.46037847 | 0.73086774 |
| Ogdhl       | 13277.9248 | 0.14899211 | 0.16011337 | 0.93054133 | 0.35209087 | 0.64425364 |
| Zfyve26     | 4049.71603 | 0.14898147 | 0.24058831 | 0.61923819 | 0.53575946 | 0.78040421 |
| A530088E08F | 2.63006851 | 0.14893707 | 0.32855546 | 0.45330876 | 0.65032643 | NA         |
| Gm6578      | 2.50560355 | 0.14888005 | 0.2960892  | 0.50282162 | 0.61508969 | NA         |
| Gbp11       | 0.97771447 | 0.14884383 | 0.18770754 | 0.79295604 | 0.42780344 | NA         |
| Srpx        | 0.97771447 | 0.14884383 | 0.18770754 | 0.79295604 | 0.42780344 | NA         |
| Pdia2       | 10.9652718 | 0.14877921 | 0.42855299 | 0.34716642 | 0.7284663  | 0.8900505  |
| Ogn         | 2.32158948 | 0.14873049 | 0.25119356 | 0.59209515 | 0.55378688 | NA         |
| Msto1       | 6487.65325 | 0.14870671 | 0.1988778  | 0.74772906 | 0.4546236  | 0.72518943 |
| Gm16793     | 0.9257535  | 0.14870509 | 0.18768146 | 0.79232701 | 0.42817003 | NA         |
| Rdh16       | 0.9257535  | 0.14870509 | 0.18768146 | 0.79232701 | 0.42817003 | NA         |
| Htr7        | 0.9257535  | 0.14870509 | 0.18768146 | 0.79232701 | 0.42817003 | NA         |
| A830082K12F | 4.1232654  | 0.14847326 | 0.35248142 | 0.42122295 | 0.67359229 | NA         |
| A330040F15F | 0.970255   | 0.148401   | 0.23947535 | 0.61969218 | 0.53546047 | NA         |
| Mtx1        | 4086.8428  | 0.14837999 | 0.20051726 | 0.73998611 | 0.45930842 | 0.72986186 |
| Eef2k       | 2707.55211 | 0.14828919 | 0.24867406 | 0.5963195  | 0.55096181 | 0.79097822 |
| Jdp2        | 1311.18646 | 0.14822032 | 0.24443978 | 0.60636743 | 0.54427079 | 0.78623679 |
| Fbxo28      | 3478.08712 | 0.14819188 | 0.18305775 | 0.80953618 | 0.4182068  | 0.6990579  |
| A630066F11F | 46.9837043 | 0.14793621 | 0.34854384 | 0.42444076 | 0.6712444  | 0.86169074 |
| Fancg       | 2159.35164 | 0.1478589  | 0.19576536 | 0.75528633 | 0.4500772  | 0.72275987 |
| Dna2        | 8425.01376 | 0.14782673 | 0.16956697 | 0.87178968 | 0.38332312 | 0.67244726 |
| 10-Mar      | 1.96853875 | 0.14777474 | 0.32336739 | 0.45698714 | 0.64768029 | NA         |
| Per3        | 201.262558 | 0.14769705 | 0.32595943 | 0.45311482 | 0.65046606 | 0.84904399 |
| Cog7        | 3346.28535 | 0.14767109 | 0.19566352 | 0.75471958 | 0.45041726 | 0.7229269  |
| Sel1l3      | 2.88453076 | 0.14764361 | 0.33148196 | 0.44540468 | 0.65602733 | NA         |
| Rln1        | 88.5280881 | 0.14754815 | 0.29038096 | 0.50811921 | 0.61136974 | 0.82680328 |
| Akirin1     | 3980.6013  | 0.14753838 | 0.15862762 | 0.93009261 | 0.35232314 | 0.64439796 |
| Ppp2r1b     | 7235.53485 | 0.14751743 | 0.20895254 | 0.70598532 | 0.48019727 | 0.74407463 |
| Tspan11     | 6.09746121 | 0.14748909 | 0.37924512 | 0.38890173 | 0.69734884 | 0.87645821 |
| Xcr1        | 0.96516464 | 0.14747947 | 0.18692827 | 0.7889629  | 0.43013369 | NA         |

|             |            |            |            |            |            |            |
|-------------|------------|------------|------------|------------|------------|------------|
| Srpx2       | 0.96516464 | 0.14747947 | 0.18692827 | 0.7889629  | 0.43013369 | NA         |
| Mmp25       | 48.5645636 | 0.14742034 | 0.38909718 | 0.37887794 | 0.70477851 | 0.87942876 |
| Fam151b     | 57.4365079 | 0.14739079 | 0.40414782 | 0.36469526 | 0.7153389  | 0.88470138 |
| Rab26os     | 537.838165 | 0.14737698 | 0.32129082 | 0.45870274 | 0.64644764 | 0.84705994 |
| Txndc15     | 2602.87964 | 0.14728577 | 0.17773217 | 0.82869503 | 0.407277   | 0.69113538 |
| Clptm1l     | 3543.94665 | 0.14726522 | 0.18259132 | 0.80652915 | 0.41993781 | 0.70031666 |
| Eci1        | 2785.24013 | 0.14718569 | 0.21769293 | 0.67611604 | 0.49896697 | 0.75696826 |
| Zfp667      | 1397.02541 | 0.14713024 | 0.19291489 | 0.76266916 | 0.44566073 | 0.71885385 |
| Tstd3       | 2507.11381 | 0.14706094 | 0.21645395 | 0.67940981 | 0.49687823 | 0.7560535  |
| Abcb10      | 2730.34529 | 0.14705385 | 0.17518938 | 0.83939932 | 0.40124526 | 0.6864738  |
| Frmd8       | 3434.25634 | 0.14704517 | 0.20299109 | 0.72439225 | 0.46882495 | 0.73665726 |
| Serpina3g   | 17.1541056 | 0.14700135 | 0.43189171 | 0.34036623 | 0.73358075 | 0.892514   |
| Mir700      | 0.93122125 | 0.1469913  | 0.23503413 | 0.62540404 | 0.53170591 | NA         |
| Krt27       | 0.93122125 | 0.1469913  | 0.23503413 | 0.62540404 | 0.53170591 | NA         |
| 4930552P12F | 20.1497457 | 0.14692073 | 0.43207055 | 0.34003876 | 0.73382734 | 0.892514   |
| Syna        | 14.2555581 | 0.14687977 | 0.43157457 | 0.34033462 | 0.73360455 | 0.892514   |
| Ctdsp1      | 2238.17049 | 0.14686256 | 0.21173786 | 0.69360558 | 0.48792959 | 0.74917686 |
| Pdss2       | 722.74173  | 0.1467694  | 0.21588828 | 0.67983957 | 0.49660605 | 0.75601768 |
| Gm20750     | 38.1890466 | 0.14663627 | 0.19016332 | 0.77110705 | NA         | NA         |
| St7         | 260.468222 | 0.14659978 | 0.2375852  | 0.61704087 | 0.53720777 | 0.78112371 |
| B3gat2      | 1.59391186 | 0.14658148 | 0.23709553 | 0.61823804 | 0.53641844 | NA         |
| Siah3       | 0.9168361  | 0.14657895 | 0.18644929 | 0.78615989 | 0.43177382 | NA         |
| Ptpr        | 2.68061043 | 0.14638791 | 0.33058178 | 0.44281904 | 0.65789663 | NA         |
| Ptgr2       | 3206.26717 | 0.14638266 | 0.20271954 | 0.72209449 | 0.47023639 | 0.73786621 |
| Gm13498     | 17.6029136 | 0.14637614 | 0.43202027 | 0.33881775 | 0.73474703 | 0.89307887 |
| B020004J07R | 6.20630395 | 0.14621588 | 0.35537906 | 0.41143638 | 0.68075258 | 0.86681269 |
| Araf        | 3715.16429 | 0.14621526 | 0.14714698 | 0.9936681  | 0.32038448 | 0.61426445 |
| Tdrd6       | 1.42460938 | 0.14614782 | 0.2569524  | 0.56877391 | 0.56950958 | NA         |
| Rhox3a      | 0.90428628 | 0.14611264 | 0.18618916 | 0.78475376 | 0.43259796 | NA         |
| Clp1        | 3522.71706 | 0.14601933 | 0.16445333 | 0.88790742 | 0.37459055 | 0.6642255  |
| Rnf34       | 5660.07035 | 0.1459452  | 0.15619763 | 0.93436242 | 0.35011697 | 0.64198433 |
| 5830416P10F | 45.634172  | 0.14593432 | 0.43190024 | 0.33788896 | 0.73544687 | 0.89343006 |
| B130034C11F | 5.92590765 | 0.14587277 | 0.40954114 | 0.35618587 | 0.72170137 | 0.8869273  |
| 1110058L19F | 1008.48455 | 0.1458638  | 0.22534907 | 0.64727936 | 0.51745116 | 0.76803758 |
| Prkcsh      | 11034.6421 | 0.1457999  | 0.18875705 | 0.77242095 | 0.43986515 | 0.71394875 |
| Insm1       | 10.5993896 | 0.14571515 | 0.41195172 | 0.353719   | 0.72354948 | 0.88807561 |
| Nlrp12      | 28.0405179 | 0.14569557 | 0.41408458 | 0.35184979 | 0.72495092 | 0.88888368 |
| Lrp10       | 2104.94002 | 0.14566024 | 0.22306684 | 0.65298923 | 0.51376322 | 0.76592775 |
| Mbd6        | 2328.5724  | 0.14563159 | 0.20895671 | 0.69694626 | 0.48583643 | 0.74775368 |
| Txlnb       | 570.687321 | 0.14552998 | 0.35136601 | 0.41418342 | 0.67873978 | 0.86604267 |
| 4930412O13I | 0.90604793 | 0.14526949 | 0.18569314 | 0.78230939 | 0.43403277 | NA         |

|             |            |            |            |            |            |            |
|-------------|------------|------------|------------|------------|------------|------------|
| Vipr2       | 0.90604793 | 0.14526949 | 0.18569314 | 0.78230939 | 0.43403277 | NA         |
| Anks3       | 1377.52342 | 0.14518166 | 0.16753347 | 0.86658301 | 0.38617053 | 0.67521226 |
| Fam13a      | 102.75497  | 0.14514293 | 0.33130104 | 0.43809983 | 0.66131392 | 0.85550654 |
| Bcl2l1      | 2904.52592 | 0.14512735 | 0.18527193 | 0.78332076 | 0.43343877 | 0.7084618  |
| Polr2i      | 3418.75194 | 0.14504483 | 0.21389033 | 0.67812711 | 0.4976911  | 0.75633679 |
| Snora62     | 23.8453906 | 0.14491743 | 0.41920202 | 0.34569831 | 0.72956946 | 0.89040454 |
| Avpr1a      | 1.125246   | 0.14482953 | 0.2175872  | 0.66561604 | 0.50565655 | NA         |
| Zfp384      | 3088.82543 | 0.14472188 | 0.20350539 | 0.71114522 | 0.47699425 | 0.7420212  |
| Gm12238     | 9.58680947 | 0.144717   | 0.43031157 | 0.33630749 | 0.736639   | 0.89391128 |
| Ahrr        | 70.4032909 | 0.14456325 | 0.32090167 | 0.45049078 | 0.6523566  | 0.85029773 |
| Rab27b      | 2.85646072 | 0.14446853 | 0.29931034 | 0.48267135 | 0.62932911 | NA         |
| E330011O21l | 11.2780055 | 0.14444571 | 0.43016976 | 0.33578768 | 0.73703098 | 0.89391803 |
| Cd247       | 5.46644384 | 0.14436108 | 0.39457774 | 0.36586221 | 0.7144679  | NA         |
| Serinc2     | 223.368303 | 0.14433183 | 0.31921625 | 0.45214437 | 0.65116498 | 0.8494066  |
| Cdc6        | 6452.59916 | 0.14416696 | 0.19698284 | 0.73187573 | 0.46424442 | 0.73383462 |
| Atp6v0e     | 4408.53893 | 0.14412997 | 0.19441703 | 0.74134436 | 0.45848467 | 0.72916661 |
| Dclk1       | 11.9749211 | 0.14411286 | 0.42599514 | 0.33829695 | 0.73513942 | 0.89329078 |
| Rnaseh2c    | 1280.30863 | 0.14409203 | 0.24660128 | 0.58431177 | 0.55901057 | 0.79717317 |
| Fam192a     | 4257.17104 | 0.14405865 | 0.18872897 | 0.7633097  | 0.44527872 | 0.71865423 |
| Mkxn1       | 20275.6702 | 0.14405729 | 0.2479929  | 0.5808928  | 0.56131271 | 0.79905798 |
| Tmem223     | 813.91639  | 0.14401147 | 0.22513281 | 0.63967341 | 0.52238494 | 0.77084692 |
| Cc2d1b      | 5196.28668 | 0.14385005 | 0.20666022 | 0.69607031 | 0.4863848  | 0.7479826  |
| Fancm       | 8129.81144 | 0.14377941 | 0.28543839 | 0.50371434 | 0.61446213 | 0.82915219 |
| Prrg2       | 409.298371 | 0.14373601 | 0.3317665  | 0.43324449 | 0.66483716 | 0.85750043 |
| Zfp64       | 4205.63703 | 0.14364499 | 0.1891704  | 0.75934178 | 0.44764813 | 0.72071395 |
| Ndufb2      | 2985.5342  | 0.14362809 | 0.21918073 | 0.65529524 | 0.51227769 | 0.76528308 |
| Eid2b       | 444.61881  | 0.14357199 | 0.20982127 | 0.68425848 | 0.49381196 | 0.75397838 |
| Ssr1        | 16486.8687 | 0.14348187 | 0.17818346 | 0.80524797 | 0.4206766  | 0.70091929 |
| Fam133b     | 2578.61606 | 0.14347937 | 0.17029266 | 0.84254584 | 0.39948249 | 0.68486983 |
| Thbs4       | 4.26801517 | 0.14323274 | 0.39304091 | 0.36442197 | 0.71554293 | NA         |
| 2810408M09  | 608.180381 | 0.14315328 | 0.21971285 | 0.65154715 | 0.51469335 | 0.76641122 |
| Cep95       | 1986.47917 | 0.14290363 | 0.17554802 | 0.81404299 | 0.41562032 | 0.69777304 |
| Klf4        | 18827.536  | 0.14289721 | 0.17955953 | 0.79582077 | 0.42613622 | 0.70402942 |
| Adpgk       | 6848.96833 | 0.14289197 | 0.15131012 | 0.94436495 | 0.34498319 | 0.63773152 |
| Abhd10      | 1887.75453 | 0.14288867 | 0.16559953 | 0.86285674 | 0.38821624 | 0.67734216 |
| 2700038G22l | 549.335515 | 0.14288154 | 0.26933073 | 0.53050591 | 0.59576122 | 0.81869046 |
| Olr1        | 1.31316028 | 0.14281985 | 0.18395042 | 0.77640402 | 0.43751047 | NA         |
| Hao1        | 1.31316028 | 0.14281985 | 0.18395042 | 0.77640402 | 0.43751047 | NA         |
| Inpp5a      | 1432.75769 | 0.14279313 | 0.22560151 | 0.63294405 | 0.52677018 | 0.77441889 |
| Tsg101      | 4048.13674 | 0.14271514 | 0.18497943 | 0.77151899 | 0.44039937 | 0.71440317 |
| Actg1       | 13354.2321 | 0.14263372 | 0.21686894 | 0.65769546 | 0.51073384 | 0.76473508 |

|             |            |            |            |            |            |            |
|-------------|------------|------------|------------|------------|------------|------------|
| Bcap31      | 9106.72568 | 0.14261479 | 0.15784757 | 0.90349688 | 0.36626224 | 0.65672134 |
| Dnttip1     | 1627.53105 | 0.14245039 | 0.16868816 | 0.84445991 | 0.39841246 | 0.68438221 |
| Dnah17      | 532.52604  | 0.14244763 | 0.37394269 | 0.38093438 | 0.70325194 | 0.87926282 |
| Tm2d1       | 1140.24038 | 0.14242113 | 0.25824866 | 0.55148838 | 0.58129893 | 0.80936339 |
| Zbtb34      | 3130.05649 | 0.14240619 | 0.23941483 | 0.59480939 | 0.55197089 | 0.79170811 |
| 2410015M20  | 4244.00135 | 0.14239865 | 0.21940344 | 0.64902651 | 0.51632124 | 0.76725386 |
| Ybey        | 418.854708 | 0.1423956  | 0.20461074 | 0.69593415 | 0.48647007 | 0.7479826  |
| Kcmf1       | 7793.73306 | 0.14238766 | 0.15559698 | 0.91510559 | 0.3601362  | 0.65121838 |
| Prkc        | 2035.11091 | 0.14237679 | 0.20503014 | 0.69441884 | 0.48741958 | 0.74885022 |
| Pgam5       | 6048.3901  | 0.14235494 | 0.16421284 | 0.86689285 | 0.38600072 | 0.67506716 |
| Dab2ip      | 5990.4553  | 0.14233475 | 0.23692755 | 0.60075221 | 0.54800504 | 0.78881129 |
| DQ267101    | 2.28798509 | 0.14223762 | 0.34554446 | 0.41163334 | 0.68060819 | NA         |
| Atat1       | 815.376103 | 0.14210622 | 0.2078443  | 0.68371478 | 0.49415529 | 0.75428042 |
| Asgr1       | 3.41161676 | 0.14197162 | 0.3746992  | 0.37889492 | 0.70476589 | NA         |
| Flot1       | 1317.47655 | 0.14194896 | 0.2548057  | 0.55708707 | 0.57746794 | 0.80735449 |
| Pdzd9       | 1.57967404 | 0.14186494 | 0.28950248 | 0.49003014 | 0.62411257 | NA         |
| Trpt1       | 339.603593 | 0.14184233 | 0.26085047 | 0.54376872 | 0.58660063 | 0.81285599 |
| Zc3h4       | 5454.21618 | 0.14173365 | 0.27320072 | 0.51878943 | 0.60390759 | 0.82288924 |
| Ubt1        | 1126.11768 | 0.1416281  | 0.18004983 | 0.78660506 | 0.4315131  | 0.70688509 |
| Zfp78       | 441.877855 | 0.14158334 | 0.22495409 | 0.62938769 | 0.52909527 | 0.77604138 |
| Ino80b      | 756.861762 | 0.14154259 | 0.23609081 | 0.59952603 | 0.54882216 | 0.78930301 |
| E130201H02I | 4.80075097 | 0.14149437 | 0.40780076 | 0.34696937 | 0.72861433 | NA         |
| Etnk1       | 13345.6032 | 0.14140819 | 0.24285403 | 0.58227646 | 0.56038048 | 0.79834183 |
| Zadh2       | 429.137086 | 0.14138463 | 0.23803253 | 0.59397186 | 0.55253093 | 0.79185407 |
| H2afb1      | 1.79000857 | 0.14135141 | 0.27252516 | 0.51867289 | 0.60398887 | NA         |
| Mllt6       | 14906.1956 | 0.14132156 | 0.18369962 | 0.76930786 | 0.44171057 | 0.71556426 |
| Nfkbil1     | 692.984896 | 0.14131897 | 0.22015966 | 0.6418931  | 0.5209426  | 0.76986886 |
| Sorbs1      | 1739.39483 | 0.14127608 | 0.30077904 | 0.46970054 | 0.63856898 | 0.84187189 |
| Ube2d2b     | 3.57312078 | 0.14122396 | 0.35262442 | 0.40049399 | 0.68879271 | NA         |
| Ifi202b     | 1.14901525 | 0.14120628 | 0.1830899  | 0.77124014 | 0.44056461 | NA         |
| Galnt16     | 1.14901525 | 0.14120628 | 0.1830899  | 0.77124014 | 0.44056461 | NA         |
| Mndal       | 1.14901525 | 0.14120628 | 0.1830899  | 0.77124014 | 0.44056461 | NA         |
| S100z       | 1.43414081 | 0.14110501 | 0.25857054 | 0.54571187 | 0.58526401 | NA         |
| Lzic        | 2862.83525 | 0.14103229 | 0.15968302 | 0.88320156 | 0.37712738 | 0.66712636 |
| Pth2r       | 2.2876077  | 0.14087562 | 0.35160909 | 0.40065978 | 0.68867062 | NA         |
| Pdzd8       | 4447.93247 | 0.1408273  | 0.22376705 | 0.62934779 | 0.52912139 | 0.77604138 |
| Cox11       | 1850.11232 | 0.1408026  | 0.16912353 | 0.83254293 | 0.40510255 | 0.68916712 |
| Ppp1r1a     | 1319.32382 | 0.140777   | 0.32328848 | 0.4354532  | 0.6632335  | 0.85649761 |
| Col25a1     | 2.43882552 | 0.1407637  | 0.3331155  | 0.42256724 | 0.67261103 | NA         |
| Csnk1g3     | 2854.85823 | 0.14060438 | 0.18528732 | 0.75884514 | 0.4479452  | 0.7208937  |
| Dnase1      | 3.33821726 | 0.14049662 | 0.36168446 | 0.38845081 | 0.69768245 | NA         |

|             |            |            |            |            |            |            |
|-------------|------------|------------|------------|------------|------------|------------|
| Mtor        | 6858.57849 | 0.14046727 | 0.21257495 | 0.66078937 | 0.5087474  | 0.76362746 |
| Wfdc1       | 3.50069946 | 0.14037446 | 0.37113046 | 0.37823481 | 0.70525617 | NA         |
| Al646519    | 1.2602277  | 0.14033407 | 0.25444984 | 0.55151958 | 0.58127755 | NA         |
| Rps6kb2     | 889.848968 | 0.14028404 | 0.20816828 | 0.67389727 | 0.50037663 | 0.75782595 |
| Tatdn2      | 3209.87829 | 0.14020766 | 0.21459531 | 0.65335844 | 0.51352523 | 0.76592775 |
| Mir668      | 1.91519351 | 0.14020628 | 0.31657849 | 0.44288001 | 0.65785253 | NA         |
| Def6        | 2247.50619 | 0.14002816 | 0.17879828 | 0.78316277 | 0.43353153 | 0.70847508 |
| Trim2       | 2092.79238 | 0.13993735 | 0.27715512 | 0.50490624 | 0.61362469 | 0.82850171 |
| Pomgnt2     | 169.42749  | 0.13989781 | 0.319961   | 0.43723393 | 0.66194171 | 0.8559667  |
| Tm4sf19     | 3.79921217 | 0.13979703 | 0.37677567 | 0.37103519 | 0.71061132 | NA         |
| Pfdn1       | 11020.2549 | 0.13968988 | 0.23103002 | 0.60463952 | 0.54541854 | 0.78666331 |
| Rhox4f      | 1.14017151 | 0.13956122 | 0.21849277 | 0.63874527 | 0.52298865 | NA         |
| Flywch1     | 1350.1716  | 0.1395058  | 0.23797866 | 0.5862114  | 0.55773346 | 0.79637435 |
| Umps        | 10941.9449 | 0.13947753 | 0.21382996 | 0.65228244 | 0.51421898 | 0.76610648 |
| Slc35f2     | 6341.40001 | 0.13941777 | 0.27880993 | 0.50004593 | 0.61704274 | 0.83032065 |
| Olf787      | 1.11985191 | 0.13939077 | 0.21398503 | 0.65140432 | 0.51478552 | NA         |
| Usf1        | 4179.66969 | 0.13938291 | 0.19514028 | 0.71427032 | 0.47506004 | 0.7406365  |
| Sod1        | 33492.1061 | 0.13931793 | 0.20025816 | 0.69569163 | 0.48662197 | 0.74804065 |
| Cdc42bpb    | 5442.73173 | 0.13929767 | 0.21701338 | 0.64188519 | 0.52094773 | 0.76986886 |
| Phox2b      | 1.14732726 | 0.13925386 | 0.21800644 | 0.63876032 | 0.52297886 | NA         |
| Gli3        | 922.218644 | 0.13912035 | 0.26988144 | 0.51548692 | 0.60621281 | 0.8242033  |
| Ctla2a      | 0.98487021 | 0.1391178  | 0.18196363 | 0.76453628 | 0.44454773 | NA         |
| Mmp1b       | 0.98487021 | 0.1391178  | 0.18196363 | 0.76453628 | 0.44454773 | NA         |
| Adam20      | 0.98487021 | 0.1391178  | 0.18196363 | 0.76453628 | 0.44454773 | NA         |
| Obox2       | 0.98487021 | 0.1391178  | 0.18196363 | 0.76453628 | 0.44454773 | NA         |
| Olf837      | 0.98487021 | 0.1391178  | 0.18196363 | 0.76453628 | 0.44454773 | NA         |
| Mnda        | 0.98487021 | 0.1391178  | 0.18196363 | 0.76453628 | 0.44454773 | NA         |
| 4933428C19F | 0.98487021 | 0.1391178  | 0.18196363 | 0.76453628 | 0.44454773 | NA         |
| 2900052N01I | 9.65427588 | 0.1391119  | 0.41864582 | 0.33229019 | 0.73967015 | 0.89521445 |
| Prss39      | 3.05076099 | 0.13907223 | 0.3452492  | 0.40281695 | 0.68708289 | NA         |
| 2610001J05R | 2205.30123 | 0.13900176 | 0.16979798 | 0.81863025 | 0.4129974  | 0.69515344 |
| Adal        | 2416.86097 | 0.13871967 | 0.16846923 | 0.82341249 | 0.41027346 | 0.69309338 |
| Snord92     | 1.80707312 | 0.13871921 | 0.26982702 | 0.51410424 | 0.60717911 | NA         |
| Mul1        | 1680.49689 | 0.13868746 | 0.22008344 | 0.63015857 | 0.52859085 | 0.77562901 |
| Gm20753     | 0.88634236 | 0.13864779 | 0.1817658  | 0.76278257 | 0.44559308 | NA         |
| Pinx1       | 1603.32558 | 0.13863758 | 0.21807413 | 0.63573604 | 0.52494848 | 0.77262188 |
| Nos2        | 17.9944798 | 0.13858341 | 0.43058541 | 0.32184883 | 0.74756722 | 0.90028791 |
| Sqrdl       | 1.56850848 | 0.13857361 | 0.29479313 | 0.47007068 | 0.63830452 | NA         |
| Pax3        | 14.2394261 | 0.13855354 | 0.42207051 | 0.32827107 | 0.74270672 | 0.89701854 |
| Stx5a       | 2880.96452 | 0.13848979 | 0.16971987 | 0.81599042 | 0.41450561 | 0.69678703 |
| Ece2        | 1812.75099 | 0.13846533 | 0.25163194 | 0.5502693  | 0.58213468 | 0.81000763 |

|             |            |            |            |            |            |            |
|-------------|------------|------------|------------|------------|------------|------------|
| Lta4h       | 5926.2202  | 0.13827148 | 0.16921853 | 0.81711784 | 0.41386109 | 0.69620522 |
| Mterf1a     | 343.198625 | 0.13823175 | 0.26280074 | 0.5259945  | 0.59889203 | 0.82005546 |
| Hoxc13      | 1061.19278 | 0.13812079 | 0.19830997 | 0.69648938 | 0.4861224  | 0.7479571  |
| Rapsn       | 599.501583 | 0.13811687 | 0.22145819 | 0.6236702  | 0.5328442  | 0.77885705 |
| Gm4832      | 3.83398107 | 0.13797979 | 0.3583832  | 0.38500631 | 0.70023274 | NA         |
| Sumo1       | 10696.5944 | 0.13795882 | 0.17234542 | 0.80047858 | 0.42343357 | 0.7023054  |
| Htr6        | 12.5882894 | 0.1379417  | 0.42896759 | 0.32156671 | 0.74778097 | 0.9004756  |
| Scfd2       | 781.704617 | 0.13790983 | 0.2047463  | 0.67356445 | 0.50058826 | 0.75785125 |
| 2210409E12F | 4260.24816 | 0.13786774 | 0.4322721  | 0.3189374  | 0.74977398 | 0.90092221 |
| Cmpk2       | 67.5785285 | 0.1377249  | 0.40837636 | 0.33724993 | 0.7359285  | 0.89366094 |
| Tlr6        | 3.69781628 | 0.13772278 | 0.39154461 | 0.35174224 | 0.72503158 | NA         |
| Arf2        | 2396.09051 | 0.13765434 | 0.23070645 | 0.59666446 | 0.55073143 | 0.79097822 |
| Ndufb6      | 4709.19992 | 0.13758286 | 0.17761148 | 0.77462819 | 0.43855939 | 0.71220104 |
| 1110051M20  | 719.155838 | 0.13744977 | 0.28801551 | 0.47723043 | 0.63319804 | 0.83875001 |
| Zc3hc1      | 6441.09253 | 0.13742891 | 0.21170716 | 0.64914624 | 0.51624385 | 0.76721217 |
| Tspan6      | 433.034492 | 0.13736902 | 0.26176132 | 0.52478733 | 0.59973104 | 0.82033754 |
| Ube2m       | 5536.34914 | 0.13728745 | 0.18214222 | 0.75373764 | 0.45100677 | 0.7229937  |
| Chic2       | 1377.79035 | 0.13722107 | 0.16091481 | 0.85275603 | 0.39379461 | 0.68150459 |
| Meaf6       | 2011.26881 | 0.13713094 | 0.20154742 | 0.68039043 | 0.49625728 | 0.75578268 |
| Spata2      | 1633.99363 | 0.13668167 | 0.23940417 | 0.57092434 | 0.56805093 | 0.80306738 |
| Olfr1344    | 1.50253975 | 0.13644472 | 0.23357564 | 0.58415645 | 0.55911506 | NA         |
| Casp12      | 0.82072518 | 0.13630775 | 0.1804256  | 0.75547899 | 0.44996163 | NA         |
| Ccl20       | 0.82072518 | 0.13630775 | 0.1804256  | 0.75547899 | 0.44996163 | NA         |
| Serpib9e    | 0.82072518 | 0.13630775 | 0.1804256  | 0.75547899 | 0.44996163 | NA         |
| Ch25h       | 0.82072518 | 0.13630775 | 0.1804256  | 0.75547899 | 0.44996163 | NA         |
| Adcy3       | 1568.56269 | 0.13627284 | 0.26083297 | 0.52245249 | 0.60135532 | 0.82154763 |
| Cd52        | 12.619113  | 0.13624804 | 0.37196748 | 0.36629019 | 0.71414855 | 0.88425449 |
| Ifi205      | 0.81356943 | 0.136178   | 0.18035395 | 0.75505973 | 0.45021314 | NA         |
| Naa40       | 9459.17495 | 0.13611175 | 0.18995179 | 0.71655942 | 0.47364599 | 0.73992114 |
| Acsm4       | 3.12566935 | 0.13610151 | 0.37195494 | 0.3659086  | 0.71443328 | NA         |
| Cyb561      | 2065.30957 | 0.13606495 | 0.20540915 | 0.6624094  | 0.50770888 | 0.76283872 |
| Sh3bgrl2    | 3612.82754 | 0.13605918 | 0.2074382  | 0.65590224 | 0.51188703 | 0.76528308 |
| Crisp2      | 0.80641369 | 0.13604669 | 0.18028137 | 0.75463532 | 0.45046783 | NA         |
| Mttr11      | 186.753445 | 0.13602037 | 0.32044012 | 0.42447983 | 0.67121591 | 0.86169074 |
| Nipa2       | 3550.87864 | 0.13601201 | 0.19661882 | 0.6917548  | 0.48909132 | 0.75015871 |
| Lrrtm1      | 0.80101961 | 0.13594357 | 0.18022434 | 0.75430195 | 0.45066793 | NA         |
| Mgam        | 0.80101961 | 0.13594357 | 0.18022434 | 0.75430195 | 0.45066793 | NA         |
| 4933406I18R | 0.80101961 | 0.13594357 | 0.18022434 | 0.75430195 | 0.45066793 | NA         |
| Cst7        | 0.80101961 | 0.13594357 | 0.18022434 | 0.75430195 | 0.45066793 | NA         |
| Mrpl28      | 4771.56717 | 0.13594326 | 0.20150309 | 0.67464601 | 0.49990069 | 0.75754781 |
| Wdr1        | 9822.62258 | 0.13590832 | 0.20390466 | 0.66652878 | 0.50507317 | 0.7607897  |

|             |            |            |            |            |            |            |
|-------------|------------|------------|------------|------------|------------|------------|
| Rad52       | 781.858435 | 0.13580717 | 0.19218604 | 0.70664427 | 0.47978757 | 0.74388599 |
| Sel1l2      | 0.79210221 | 0.13577403 | 0.18013342 | 0.75374151 | 0.45100445 | NA         |
| Mir496      | 0.78494647 | 0.13563791 | 0.18005798 | 0.7533013  | 0.45126888 | NA         |
| Gfral       | 0.78131403 | 0.13556167 | 0.1800157  | 0.7530547  | 0.45141704 | NA         |
| lqck        | 30.4212622 | 0.13555761 | 0.43215132 | 0.3136809  | 0.75376341 | 0.90191816 |
| Mgmt        | 1432.14594 | 0.13539127 | 0.29423358 | 0.46014895 | 0.64540931 | 0.84629525 |
| Gpr22       | 0.76160846 | 0.1351771  | 0.17979929 | 0.75182218 | 0.452158   | NA         |
| Crnn        | 0.76160846 | 0.1351771  | 0.17979929 | 0.75182218 | 0.452158   | NA         |
| Snord82     | 2.32162476 | 0.1351631  | 0.34111613 | 0.39623777 | 0.69192963 | NA         |
| Cntf        | 15.5756609 | 0.1351531  | 0.43020109 | 0.31416262 | 0.75339753 | 0.90191816 |
| Dhh         | 30.98998   | 0.13509663 | 0.40065321 | 0.33719093 | 0.73597297 | 0.89366094 |
| Lmln        | 376.116355 | 0.1350254  | 0.2732818  | 0.49408851 | 0.62124367 | 0.83196874 |
| C8a         | 4.23458333 | 0.13499794 | 0.30956341 | 0.43609141 | 0.66277041 | NA         |
| Snhg12      | 3035.03472 | 0.13499661 | 0.18983083 | 0.71114169 | 0.47699644 | 0.7420212  |
| Ubap1       | 4240.57931 | 0.13498477 | 0.1678512  | 0.80419307 | 0.42128548 | 0.70106052 |
| Gsdmcl-ps   | 1.10252203 | 0.13493546 | 0.21662384 | 0.62290218 | 0.5333488  | NA         |
| Mir412      | 0.74729698 | 0.13488809 | 0.17963851 | 0.75088629 | 0.45272109 | NA         |
| Mir26b      | 0.74729698 | 0.13488809 | 0.17963851 | 0.75088629 | 0.45272109 | NA         |
| Zfp597      | 1331.60458 | 0.1348437  | 0.18735905 | 0.71970744 | 0.47170515 | 0.73859646 |
| Uap1l1      | 3852.26881 | 0.13481091 | 0.25945423 | 0.51959419 | 0.60334645 | 0.82274997 |
| Arl14       | 0.74190289 | 0.13477367 | 0.17957477 | 0.75051561 | 0.45294423 | NA         |
| Bhlhe41     | 82.0512257 | 0.13471589 | 0.43212533 | 0.3117519  | 0.75522908 | 0.90191816 |
| Terc        | 10.3411668 | 0.13470907 | 0.4196531  | 0.32100102 | 0.74820962 | 0.90057336 |
| Alg5        | 2196.1387  | 0.13467864 | 0.2094431  | 0.6430321  | 0.52020327 | 0.76986886 |
| Slc13a2os   | 5.5586473  | 0.13467634 | 0.411421   | 0.32734435 | 0.74340746 | NA         |
| Slc25a42    | 643.632704 | 0.1346715  | 0.23502838 | 0.573001   | 0.56664402 | 0.80239311 |
| Kifc2       | 502.076688 | 0.13462029 | 0.27060081 | 0.49748663 | 0.61884593 | 0.83090659 |
| Uchl4       | 115.889841 | 0.13459666 | 0.30836715 | 0.43648183 | 0.66248718 | 0.85619416 |
| Pitpnm1     | 102.697682 | 0.13458005 | 0.34484826 | 0.39025876 | 0.69634522 | 0.87602538 |
| Mmp11       | 1988.74911 | 0.13452687 | 0.23416961 | 0.57448476 | 0.56563981 | 0.80162806 |
| Msln        | 976.803037 | 0.13445881 | 0.43221212 | 0.31109449 | 0.75572879 | 0.90203956 |
| 1810055G02I | 2055.78835 | 0.13444965 | 0.18486898 | 0.7272699  | 0.46706064 | 0.73566899 |
| Trib3       | 2600.93896 | 0.13444886 | 0.21116715 | 0.63669401 | 0.52432417 | 0.77206375 |
| Arhgef2     | 4297.62834 | 0.13444384 | 0.1991042  | 0.6752436  | 0.49952101 | 0.75725268 |
| 4930570G19I | 1.88771817 | 0.13437992 | 0.30644294 | 0.43851531 | 0.66101278 | NA         |
| Lrrc14b     | 1.64078905 | 0.13435502 | 0.29032244 | 0.46277862 | 0.64352306 | NA         |
| Fth1        | 23605.3749 | 0.13432832 | 0.1836769  | 0.73132943 | 0.46457796 | 0.73397175 |
| Sytl1       | 135.179676 | 0.13431648 | 0.31135332 | 0.43139568 | 0.66618069 | 0.8585804  |
| Mir7036     | 3.04763053 | 0.13420449 | 0.34592153 | 0.38796223 | 0.69804399 | NA         |
| Etfa        | 8420.16761 | 0.13415597 | 0.17456649 | 0.76850929 | 0.44218467 | 0.7159317  |
| Furin       | 2169.11768 | 0.13413403 | 0.17841116 | 0.75182532 | 0.45215612 | 0.72407371 |



|             |            |            |            |            |            |            |
|-------------|------------|------------|------------|------------|------------|------------|
| Ing2        | 1913.01419 | 0.13407004 | 0.16910434 | 0.7928244  | 0.42788014 | 0.70472095 |
| Ankrd34b    | 82.5300079 | 0.13404116 | 0.39446329 | 0.33980643 | 0.73400231 | 0.89252476 |
| Baalc       | 5.27934178 | 0.13395005 | 0.36194866 | 0.37008026 | 0.71132269 | NA         |
| G730013B05I | 6.30182968 | 0.13394614 | 0.40544886 | 0.33036506 | 0.74112414 | 0.89614524 |
| Ccl9        | 1.14193317 | 0.13392242 | 0.21436241 | 0.6247477  | 0.53213666 | NA         |
| Sntb2       | 3928.44276 | 0.1338988  | 0.22081845 | 0.60637507 | 0.54426572 | 0.78623679 |
| Cbll1       | 2561.76702 | 0.13385624 | 0.21391771 | 0.62573708 | 0.53148741 | 0.7782358  |
| 4931440P22F | 9.60396383 | 0.13382044 | 0.43193776 | 0.30981416 | 0.75670228 | 0.90276004 |
| Kpna1       | 7958.44223 | 0.1337548  | 0.19625039 | 0.68155178 | 0.49552242 | 0.75533199 |
| Zfp787      | 370.325128 | 0.13372413 | 0.26918737 | 0.4967697  | 0.61935147 | 0.83094942 |
| Syde2       | 2258.86574 | 0.13350114 | 0.25945141 | 0.5145516  | 0.6068664  | 0.82465741 |
| Cdcp1       | 124.202056 | 0.13346248 | 0.38859955 | 0.34344476 | 0.73126389 | 0.89152719 |
| E130309D02I | 1568.95813 | 0.13341017 | 0.21155921 | 0.63060439 | 0.52829923 | 0.77552483 |
| Nfat5       | 2394.11478 | 0.13319514 | 0.29922833 | 0.44512879 | 0.65622668 | 0.85271673 |
| Ap2s1       | 4245.03098 | 0.13314569 | 0.20050304 | 0.66405821 | 0.50665305 | 0.76203338 |
| Necap2      | 2619.09542 | 0.13313772 | 0.17718184 | 0.75141856 | 0.4524008  | 0.72418447 |
| Slc38a8     | 79.5297428 | 0.13311978 | 0.41693315 | 0.31928327 | 0.74951172 | 0.90084943 |
| Xlr3c       | 1528.48745 | 0.13310595 | 0.43112495 | 0.308741   | 0.75751855 | 0.90301693 |
| Prr22       | 13.5369734 | 0.13308937 | 0.43217458 | 0.30795278 | 0.75811826 | 0.90307174 |
| Synpo       | 27.0987879 | 0.133085   | 0.41916309 | 0.31750171 | 0.75086294 | 0.90104712 |
| Slfn11      | 1.7503321  | 0.13288292 | 0.27600559 | 0.48145012 | 0.63019662 | NA         |
| Cdan1       | 2600.11798 | 0.13279142 | 0.20377724 | 0.65164991 | 0.51462704 | 0.76641122 |
| Ndfip2      | 2028.892   | 0.13276727 | 0.17035578 | 0.77935287 | 0.43577188 | 0.70987111 |
| Dact3       | 511.13755  | 0.13268464 | 0.2640989  | 0.50240513 | 0.61538257 | 0.8296328  |
| 2310015A10F | 107.664157 | 0.13265542 | 0.36889187 | 0.35960516 | 0.71914243 | 0.88581258 |
| Shroom2     | 2541.04323 | 0.13262942 | 0.25720491 | 0.51565666 | 0.60609423 | 0.82418428 |
| Mccc1       | 3781.9576  | 0.1325342  | 0.30466118 | 0.43502162 | 0.66354674 | 0.85668869 |
| Nup35       | 872.180604 | 0.13252261 | 0.19126358 | 0.69287948 | 0.48838519 | 0.74944524 |
| Hrh1        | 18.1418651 | 0.13250578 | 0.43151624 | 0.3070702  | 0.75878994 | 0.90331943 |
| Shf         | 1355.35293 | 0.13250192 | 0.23836522 | 0.55587772 | 0.57829445 | 0.80771125 |
| Atp1a3      | 447.043693 | 0.13237223 | 0.32093348 | 0.41246002 | 0.68000228 | 0.86642486 |
| Cyp2c66     | 0.65658014 | 0.13232197 | 0.17819826 | 0.74255479 | 0.45775127 | NA         |
| Ccdc110     | 0.65658014 | 0.13232197 | 0.17819826 | 0.74255479 | 0.45775127 | NA         |
| Aspn        | 0.65658014 | 0.13232197 | 0.17819826 | 0.74255479 | 0.45775127 | NA         |
| Adamts12    | 0.65658014 | 0.13232197 | 0.17819826 | 0.74255479 | 0.45775127 | NA         |
| Gm2115      | 0.65658014 | 0.13232197 | 0.17819826 | 0.74255479 | 0.45775127 | NA         |
| Tnfsf15     | 0.65658014 | 0.13232197 | 0.17819826 | 0.74255479 | 0.45775127 | NA         |
| Gm9125      | 0.65658014 | 0.13232197 | 0.17819826 | 0.74255479 | 0.45775127 | NA         |
| Vmn2r117    | 0.65658014 | 0.13232197 | 0.17819826 | 0.74255479 | 0.45775127 | NA         |
| Npas4       | 0.65658014 | 0.13232197 | 0.17819826 | 0.74255479 | 0.45775127 | NA         |
| Spam1       | 0.65658014 | 0.13232197 | 0.17819826 | 0.74255479 | 0.45775127 | NA         |

|             |            |            |            |            |            |            |
|-------------|------------|------------|------------|------------|------------|------------|
| Al607873    | 0.65658014 | 0.13232197 | 0.17819826 | 0.74255479 | 0.45775127 | NA         |
| Inhba       | 0.65658014 | 0.13232197 | 0.17819826 | 0.74255479 | 0.45775127 | NA         |
| Stx19       | 0.65658014 | 0.13232197 | 0.17819826 | 0.74255479 | 0.45775127 | NA         |
| Krt86       | 0.65658014 | 0.13232197 | 0.17819826 | 0.74255479 | 0.45775127 | NA         |
| Gtf2a2      | 4030.65989 | 0.13227687 | 0.18505833 | 0.71478474 | 0.47474206 | 0.74052205 |
| Cc2d1a      | 2068.0919  | 0.13223774 | 0.28817873 | 0.45887405 | 0.64632461 | 0.84705994 |
| Nop10       | 7363.20065 | 0.13222988 | 0.19410128 | 0.68124165 | 0.4957186  | 0.75548019 |
| Nkapl       | 19.9582238 | 0.13221603 | 0.41247653 | 0.32054194 | 0.74855754 | 0.900659   |
| Mgat4b      | 2064.96834 | 0.132175   | 0.1590535  | 0.8310097  | 0.40596815 | 0.68991262 |
| Tbx10       | 0.6494244  | 0.13213675 | 0.17809342 | 0.7419519  | 0.45811648 | NA         |
| Fndc8       | 0.6494244  | 0.13213675 | 0.17809342 | 0.7419519  | 0.45811648 | NA         |
| Slc26a7     | 0.6494244  | 0.13213675 | 0.17809342 | 0.7419519  | 0.45811648 | NA         |
| Chrna6      | 0.6494244  | 0.13213675 | 0.17809342 | 0.7419519  | 0.45811648 | NA         |
| Dgke        | 2653.40196 | 0.13199863 | 0.22970855 | 0.57463523 | 0.56553802 | 0.80155685 |
| Reg1        | 1.43552507 | 0.13195809 | 0.25651429 | 0.51442784 | 0.6069529  | NA         |
| Adat1       | 1791.11804 | 0.13183909 | 0.18121562 | 0.72752608 | 0.46690375 | 0.73559557 |
| Zxdb        | 114.307592 | 0.13182121 | 0.35929991 | 0.36688349 | 0.71370593 | 0.88418475 |
| Trp53inp1   | 32345.6505 | 0.13180985 | 0.20819533 | 0.63310668 | 0.52666398 | 0.77433597 |
| Gm10390     | 0.63687457 | 0.13179637 | 0.17790268 | 0.74083408 | 0.45879405 | NA         |
| Gm6377      | 0.63687457 | 0.13179637 | 0.17790268 | 0.74083408 | 0.45879405 | NA         |
| Fap         | 0.63687457 | 0.13179637 | 0.17790268 | 0.74083408 | 0.45879405 | NA         |
| Anks4b      | 0.63687457 | 0.13179637 | 0.17790268 | 0.74083408 | 0.45879405 | NA         |
| Atp1b4      | 0.63687457 | 0.13179637 | 0.17790268 | 0.74083408 | 0.45879405 | NA         |
| Fscb        | 0.63687457 | 0.13179637 | 0.17790268 | 0.74083408 | 0.45879405 | NA         |
| Grem2       | 0.63687457 | 0.13179637 | 0.17790268 | 0.74083408 | 0.45879405 | NA         |
| Rnf133      | 0.63687457 | 0.13179637 | 0.17790268 | 0.74083408 | 0.45879405 | NA         |
| Tlr9        | 0.63687457 | 0.13179637 | 0.17790268 | 0.74083408 | 0.45879405 | NA         |
| Olf1056     | 0.63511292 | 0.13175469 | 0.17787902 | 0.74069829 | 0.4588764  | NA         |
| Fam150b     | 0.63511292 | 0.13175469 | 0.17787902 | 0.74069829 | 0.4588764  | NA         |
| Mogat1      | 0.63511292 | 0.13175469 | 0.17787902 | 0.74069829 | 0.4588764  | NA         |
| Mirlet7a-1  | 0.63511292 | 0.13175469 | 0.17787902 | 0.74069829 | 0.4588764  | NA         |
| 4921504E06F | 0.63511292 | 0.13175469 | 0.17787902 | 0.74069829 | 0.4588764  | NA         |
| Far2        | 2.01007638 | 0.13168395 | 0.28053086 | 0.46940987 | 0.6387767  | NA         |
| Rela        | 1246.86186 | 0.13162288 | 0.19971084 | 0.65906726 | 0.50985258 | 0.76423377 |
| R74862      | 160.42239  | 0.13157246 | 0.32341016 | 0.40682847 | 0.68413398 | 0.8689837  |
| 4933433H22I | 0.62795718 | 0.13156563 | 0.17776939 | 0.74009156 | 0.45924444 | NA         |
| Htr3b       | 0.62795718 | 0.13156563 | 0.17776939 | 0.74009156 | 0.45924444 | NA         |
| Ms4a4d      | 1.67340203 | 0.13155557 | 0.20177209 | 0.65200085 | 0.51440063 | NA         |
| Klhl18      | 482.558648 | 0.13154927 | 0.24669405 | 0.53324866 | 0.59386146 | 0.81755839 |
| Fmnl3       | 1812.35267 | 0.13153791 | 0.20891127 | 0.62963532 | 0.52893321 | 0.77598494 |
| Rrm2        | 25980.3939 | 0.13151169 | 0.2678276  | 0.49103112 | 0.62340444 | 0.83265488 |

|             |            |            |            |            |            |            |
|-------------|------------|------------|------------|------------|------------|------------|
| 4933422A05f | 3.32302641 | 0.13134989 | 0.3557668  | 0.36920221 | 0.71197701 | NA         |
| Ttll9       | 29.4015256 | 0.1312879  | 0.41522488 | 0.31618506 | 0.75186205 | 0.90161989 |
| Sod3        | 0.617169   | 0.13125805 | 0.17759441 | 0.73908887 | 0.45985303 | NA         |
| Unc13c      | 0.617169   | 0.13125805 | 0.17759441 | 0.73908887 | 0.45985303 | NA         |
| Gpr151      | 0.617169   | 0.13125805 | 0.17759441 | 0.73908887 | 0.45985303 | NA         |
| Ren2        | 0.617169   | 0.13125805 | 0.17759441 | 0.73908887 | 0.45985303 | NA         |
| Ubb         | 18908.013  | 0.1312418  | 0.15835487 | 0.82878285 | 0.40722729 | 0.69113538 |
| Gm10549     | 0.61540735 | 0.13121487 | 0.17756982 | 0.73894803 | 0.45993856 | NA         |
| Slamf1      | 0.61540735 | 0.13121487 | 0.17756982 | 0.73894803 | 0.45993856 | NA         |
| Gpr183      | 0.61540735 | 0.13121487 | 0.17756982 | 0.73894803 | 0.45993856 | NA         |
| Gm20554     | 13.3464001 | 0.13121029 | 0.43194154 | 0.30376863 | 0.76130417 | 0.90466935 |
| Phf2        | 1184.19022 | 0.1311975  | 0.21902163 | 0.59901617 | 0.5491621  | 0.78964585 |
| Tarbp2      | 2304.57886 | 0.13108539 | 0.20408402 | 0.6423109  | 0.52067134 | 0.76986886 |
| Lgals3      | 493.940223 | 0.1310315  | 0.34805848 | 0.37646405 | 0.70657194 | 0.88063557 |
| Arl9        | 1.68106993 | 0.13092359 | 0.26722654 | 0.48993485 | 0.62418    | NA         |
| Aspdh       | 0.60285752 | 0.13085517 | 0.17736471 | 0.73777457 | 0.46065145 | NA         |
| Isx         | 0.60285752 | 0.13085517 | 0.17736471 | 0.73777457 | 0.46065145 | NA         |
| Ucn2        | 0.60285752 | 0.13085517 | 0.17736471 | 0.73777457 | 0.46065145 | NA         |
| Mir7005     | 0.59746343 | 0.13069425 | 0.1772728  | 0.73724932 | 0.46097075 | NA         |
| A230057D06f | 0.59746343 | 0.13069425 | 0.1772728  | 0.73724932 | 0.46097075 | NA         |
| Lcn12       | 1.28770304 | 0.1306334  | 0.25104199 | 0.52036474 | 0.60280938 | NA         |
| Spen        | 5321.43605 | 0.13061571 | 0.28169624 | 0.46367572 | 0.6428801  | 0.84452005 |
| Caskin2     | 1421.94934 | 0.1304868  | 0.27567805 | 0.47333038 | 0.63597749 | 0.83999371 |
| Gm9054      | 0.59030769 | 0.13048627 | 0.17715387 | 0.73657023 | 0.46138375 | NA         |
| Slco1c1     | 0.59030769 | 0.13048627 | 0.17715387 | 0.73657023 | 0.46138375 | NA         |
| Mir369      | 0.59030769 | 0.13048627 | 0.17715387 | 0.73657023 | 0.46138375 | NA         |
| Insig2      | 1441.0956  | 0.1304746  | 0.17802893 | 0.73288428 | 0.46362901 | 0.73330907 |
| Creg1       | 2130.08401 | 0.13039108 | 0.2555686  | 0.51019994 | 0.60991139 | 0.82596711 |
| Gm933       | 8.38549412 | 0.13031916 | 0.4217893  | 0.30896743 | 0.7573463  | 0.90301693 |
| 4933412E24f | 1.11816392 | 0.13028003 | 0.27223172 | 0.47856303 | 0.63224953 | NA         |
| Fgf2        | 1.96100562 | 0.13015976 | 0.31504183 | 0.41315072 | 0.67949619 | NA         |
| Cldn10      | 0.57775786 | 0.13010788 | 0.17693712 | 0.73533403 | 0.46213609 | NA         |
| Bpifb6      | 0.57775786 | 0.13010788 | 0.17693712 | 0.73533403 | 0.46213609 | NA         |
| Smco1       | 0.57775786 | 0.13010788 | 0.17693712 | 0.73533403 | 0.46213609 | NA         |
| Adh6-ps1    | 0.57775786 | 0.13010788 | 0.17693712 | 0.73533403 | 0.46213609 | NA         |
| C1qbp       | 22999.0189 | 0.12995683 | 0.16352031 | 0.79474429 | 0.42676226 | 0.70402942 |
| Ckmt1       | 3412.5791  | 0.12988617 | 0.32234598 | 0.40294024 | 0.68699219 | 0.87068415 |
| Lpar4       | 180.609425 | 0.12984949 | 0.34154948 | 0.38017768 | 0.70381353 | 0.87942876 |
| Lpar3       | 5.48939123 | 0.12968959 | 0.40770492 | 0.31809671 | 0.75041158 | NA         |
| Duox2       | 4.33425893 | 0.12965441 | 0.39226541 | 0.33052726 | 0.7410016  | NA         |
| Lypla2      | 2008.49703 | 0.12957211 | 0.24253136 | 0.5342489  | 0.59316934 | 0.81705522 |

|             |            |            |            |            |            |            |
|-------------|------------|------------|------------|------------|------------|------------|
| Ptpn3       | 1970.98125 | 0.12951489 | 0.1929424  | 0.67126193 | 0.50205368 | 0.75896148 |
| Ppard       | 1826.83114 | 0.1295106  | 0.19155791 | 0.6760911  | 0.49898281 | 0.75696826 |
| Ttll5       | 1476.80765 | 0.12932754 | 0.24581863 | 0.52610958 | 0.59881207 | 0.82005546 |
| Psmc1       | 16792.6797 | 0.12932081 | 0.1526506  | 0.84716872 | 0.39690109 | 0.68311652 |
| Thyn1       | 8796.22747 | 0.12930632 | 0.23314331 | 0.55462161 | 0.5791535  | 0.80818522 |
| Prkcdbp     | 74.4859682 | 0.12923306 | 0.39384622 | 0.32813077 | 0.74281279 | 0.89706312 |
| Zfp593      | 1841.50065 | 0.12917716 | 0.20250648 | 0.6378915  | 0.52354431 | 0.77157293 |
| Dusp5       | 129.663233 | 0.12901717 | 0.36896712 | 0.34967118 | 0.72658548 | 0.88950597 |
| Zbtb7b      | 1910.3152  | 0.12899694 | 0.29842242 | 0.4322629  | 0.66555035 | 0.8581356  |
| Hscb        | 1464.49848 | 0.12896048 | 0.22969369 | 0.56144548 | 0.57449388 | 0.806724   |
| Ppp2r5e     | 4373.08979 | 0.12888312 | 0.20079065 | 0.64187808 | 0.52095235 | 0.76986886 |
| Pde11a      | 11.4839834 | 0.12884218 | 0.40540489 | 0.31781112 | 0.75062821 | 0.90097402 |
| 3-Mar       | 43.9376993 | 0.12880268 | 0.39725551 | 0.32423131 | 0.74576292 | 0.89888072 |
| Chac2       | 270.39755  | 0.12877736 | 0.26191206 | 0.49168168 | 0.62294439 | 0.83253766 |
| Ube2d2a     | 3848.54125 | 0.12870985 | 0.16704438 | 0.77051289 | 0.44099571 | 0.71503747 |
| Mir7059     | 2.3287805  | 0.12869179 | 0.33364737 | 0.38571199 | 0.69970998 | NA         |
| Atp2b4      | 4448.80274 | 0.12867407 | 0.17770095 | 0.72410457 | 0.46900154 | 0.73676921 |
| 5430440P10F | 2.58887348 | 0.12862417 | 0.35144245 | 0.36598927 | 0.71437308 | NA         |
| Cdc23       | 14523.2646 | 0.12851205 | 0.18976226 | 0.67722659 | 0.4982622  | 0.75670871 |
| Ryr3        | 187.060589 | 0.12844489 | 0.37244943 | 0.34486532 | 0.73019563 | 0.89067944 |
| Hk1os       | 24.9241503 | 0.12841724 | 0.41900657 | 0.30648025 | 0.75923902 | 0.90370654 |
| Tns1        | 2556.8651  | 0.12834294 | 0.31181714 | 0.41159681 | 0.68063497 | 0.86680489 |
| U2af1l4     | 1551.39203 | 0.12832298 | 0.19269226 | 0.66594779 | 0.50544447 | 0.76107404 |
| Scin        | 4.92035611 | 0.12831247 | 0.37440286 | 0.34271232 | 0.73181489 | NA         |
| Sytl5       | 1.92472494 | 0.12824723 | 0.31224103 | 0.41073151 | 0.68126942 | NA         |
| Hmces       | 4854.07676 | 0.1282467  | 0.19798781 | 0.64775047 | 0.51714636 | 0.76794869 |
| Akt2        | 4250.21763 | 0.12823818 | 0.18386539 | 0.69745685 | 0.48551693 | 0.74775368 |
| Cd53        | 1.12531966 | 0.12819526 | 0.26934695 | 0.47594845 | 0.6341111  | NA         |
| Klk12       | 1.12531966 | 0.12819526 | 0.26934695 | 0.47594845 | 0.6341111  | NA         |
| Vstm4       | 1.12531966 | 0.12819526 | 0.26934695 | 0.47594845 | 0.6341111  | NA         |
| Gon4l       | 4596.70749 | 0.1281396  | 0.2113371  | 0.60632802 | 0.54429696 | 0.78623679 |
| Kcnmb1      | 4.30403052 | 0.12805731 | 0.38733355 | 0.3306125  | 0.74093721 | NA         |
| Fam73b      | 1275.43097 | 0.12804163 | 0.21185014 | 0.60439718 | 0.54557961 | 0.78674968 |
| Zmpste24    | 4290.46171 | 0.12803755 | 0.1729965  | 0.7401164  | 0.45922937 | 0.72986186 |
| Fdxr        | 1142.5341  | 0.12802221 | 0.20637382 | 0.62034132 | 0.5350331  | 0.78005097 |
| Magel2      | 8.79430714 | 0.12793607 | 0.42933152 | 0.297989   | 0.76571156 | 0.90618168 |
| Gtpbp2      | 1213.96402 | 0.12791523 | 0.18649011 | 0.68590892 | 0.49277055 | 0.75290575 |
| Ubtfl1      | 27.0816458 | 0.12789079 | 0.42590626 | 0.3002792  | 0.7639642  | 0.9056569  |
| Lhx4        | 3.31288096 | 0.12778362 | 0.33922286 | 0.37669519 | 0.70640014 | NA         |
| Ankrd16     | 786.215359 | 0.12776425 | 0.19398408 | 0.65863264 | 0.51013169 | 0.76433741 |
| Zfp13       | 1294.27709 | 0.12771956 | 0.24750159 | 0.5160353  | 0.60582975 | 0.82418428 |

|             |            |            |            |            |            |            |
|-------------|------------|------------|------------|------------|------------|------------|
| Plcd1       | 619.447637 | 0.12769352 | 0.38313713 | 0.33328412 | 0.73891982 | 0.8948635  |
| Pspn        | 1.14518821 | 0.12767038 | 0.2140074  | 0.59656995 | 0.55079454 | NA         |
| Tex12       | 51.7576945 | 0.12765506 | 0.36784957 | 0.34703062 | 0.72856832 | 0.8900505  |
| Mir568      | 1.2572093  | 0.12747416 | 0.25100151 | 0.5078621  | 0.61155005 | NA         |
| Rras2       | 5220.09995 | 0.1274382  | 0.287347   | 0.44349933 | 0.6574046  | 0.85307902 |
| Lmbrd1      | 1058.40758 | 0.12742846 | 0.2381279  | 0.53512612 | 0.59256265 | 0.81685504 |
| Mepce       | 2799.4244  | 0.12742667 | 0.20847419 | 0.61123476 | 0.54104417 | 0.7846986  |
| Scarb1      | 5892.51906 | 0.12732475 | 0.1910715  | 0.6663723  | 0.50517316 | 0.76086662 |
| Cacng4      | 20.9409697 | 0.12731598 | 0.43080123 | 0.29553299 | 0.76758675 | 0.90649963 |
| Pank2       | 4493.20965 | 0.12724299 | 0.17439446 | 0.72962746 | 0.46561793 | 0.73458704 |
| Slc1a7      | 15.3043202 | 0.12722319 | 0.43025007 | 0.29569591 | 0.76746232 | 0.90649963 |
| Ocel1       | 388.739343 | 0.12721741 | 0.33803576 | 0.37634304 | 0.70666188 | 0.88063557 |
| Ambra1      | 3874.74569 | 0.12710324 | 0.21776886 | 0.58366122 | 0.55944826 | 0.79765105 |
| Caml        | 1348.98285 | 0.12706352 | 0.16627606 | 0.76417206 | 0.44476471 | 0.71820292 |
| Tnni3       | 567.477987 | 0.12695599 | 0.32168141 | 0.39466376 | 0.69309105 | 0.87461511 |
| Ncbp2       | 6451.84785 | 0.12690152 | 0.17699588 | 0.71697441 | 0.47338989 | 0.73971926 |
| Foxd3       | 1418.84566 | 0.12687804 | 0.22763807 | 0.55736743 | 0.57727641 | 0.80734073 |
| Hcst        | 1.96639971 | 0.12683967 | 0.31096632 | 0.40788877 | 0.68335534 | NA         |
| Ovca2       | 1085.36568 | 0.12683857 | 0.20085148 | 0.63150431 | 0.52771083 | 0.77506906 |
| Acad11      | 2403.53705 | 0.12683751 | 0.18366461 | 0.69059311 | 0.48982128 | 0.750908   |
| Fam134c     | 4085.39103 | 0.12683654 | 0.16805769 | 0.75472025 | 0.45041686 | 0.7229269  |
| Gm11110     | 27.5651683 | 0.12682631 | 0.42611985 | 0.2976306  | 0.76598512 | 0.90618168 |
| Gm11837     | 203.209856 | 0.12679276 | 0.28763476 | 0.44081168 | 0.65934934 | 0.8543906  |
| 1110038F14F | 1802.17943 | 0.1267625  | 0.21496458 | 0.5896902  | 0.55539836 | 0.79464532 |
| Mark3       | 8344.78304 | 0.12673398 | 0.14230632 | 0.89057171 | 0.37315898 | 0.66295532 |
| Tmco5b      | 1.46784755 | 0.12665405 | 0.1958916  | 0.64655172 | 0.51792211 | NA         |
| Barhl2      | 8.03055957 | 0.12663823 | 0.39546441 | 0.32022661 | 0.74879655 | 0.9007559  |
| Plcx2       | 314.61001  | 0.12653123 | 0.32013367 | 0.39524498 | 0.6926621  | 0.8746012  |
| Zdhhc2      | 1573.2711  | 0.12650985 | 0.24279137 | 0.52106401 | 0.60232218 | 0.82215213 |
| Tmem165     | 7212.78998 | 0.12648615 | 0.17296782 | 0.73126983 | 0.46461436 | 0.73397175 |
| 4930448K20F | 8.55939108 | 0.12642404 | 0.43059935 | 0.29360016 | 0.76906345 | 0.90747742 |
| Cdc42ep3    | 1368.5897  | 0.12623618 | 0.18399467 | 0.68608607 | 0.49265884 | 0.75285423 |
| Ednrb       | 0.49243511 | 0.12622059 | 0.17468029 | 0.72258064 | 0.46993756 | NA         |
| G630093K05I | 0.49243511 | 0.12622059 | 0.17468029 | 0.72258064 | 0.46993756 | NA         |
| Cacng3      | 0.49243511 | 0.12622059 | 0.17468029 | 0.72258064 | 0.46993756 | NA         |
| Gzmf        | 0.49243511 | 0.12622059 | 0.17468029 | 0.72258064 | 0.46993756 | NA         |
| Col19a1     | 0.49243511 | 0.12622059 | 0.17468029 | 0.72258064 | 0.46993756 | NA         |
| P2ry14      | 0.49243511 | 0.12622059 | 0.17468029 | 0.72258064 | 0.46993756 | NA         |
| Cnga1       | 0.49243511 | 0.12622059 | 0.17468029 | 0.72258064 | 0.46993756 | NA         |
| Fibin       | 0.49243511 | 0.12622059 | 0.17468029 | 0.72258064 | 0.46993756 | NA         |
| 1700063O14I | 0.49243511 | 0.12622059 | 0.17468029 | 0.72258064 | 0.46993756 | NA         |

|             |            |            |            |            |            |            |
|-------------|------------|------------|------------|------------|------------|------------|
| H2-T24      | 0.49243511 | 0.12622059 | 0.17468029 | 0.72258064 | 0.46993756 | NA         |
| A930003A15I | 0.49243511 | 0.12622059 | 0.17468029 | 0.72258064 | 0.46993756 | NA         |
| Ndp         | 0.49243511 | 0.12622059 | 0.17468029 | 0.72258064 | 0.46993756 | NA         |
| Sh2d1b2     | 0.49243511 | 0.12622059 | 0.17468029 | 0.72258064 | 0.46993756 | NA         |
| Cyp2c65     | 0.49243511 | 0.12622059 | 0.17468029 | 0.72258064 | 0.46993756 | NA         |
| Lrrc26      | 0.49243511 | 0.12622059 | 0.17468029 | 0.72258064 | 0.46993756 | NA         |
| Ssxb9       | 0.49243511 | 0.12622059 | 0.17468029 | 0.72258064 | 0.46993756 | NA         |
| Clrn3       | 0.49243511 | 0.12622059 | 0.17468029 | 0.72258064 | 0.46993756 | NA         |
| Asb17       | 0.49243511 | 0.12622059 | 0.17468029 | 0.72258064 | 0.46993756 | NA         |
| Casp4       | 0.49243511 | 0.12622059 | 0.17468029 | 0.72258064 | 0.46993756 | NA         |
| Ranbp3l     | 0.49243511 | 0.12622059 | 0.17468029 | 0.72258064 | 0.46993756 | NA         |
| Prl2c2      | 0.49243511 | 0.12622059 | 0.17468029 | 0.72258064 | 0.46993756 | NA         |
| Olf340      | 0.49243511 | 0.12622059 | 0.17468029 | 0.72258064 | 0.46993756 | NA         |
| Banf2       | 0.49243511 | 0.12622059 | 0.17468029 | 0.72258064 | 0.46993756 | NA         |
| Olf1196     | 0.49243511 | 0.12622059 | 0.17468029 | 0.72258064 | 0.46993756 | NA         |
| Btg4        | 0.49243511 | 0.12622059 | 0.17468029 | 0.72258064 | 0.46993756 | NA         |
| Trdn        | 0.49243511 | 0.12622059 | 0.17468029 | 0.72258064 | 0.46993756 | NA         |
| Gm6696      | 0.49243511 | 0.12622059 | 0.17468029 | 0.72258064 | 0.46993756 | NA         |
| Mir1945     | 0.49243511 | 0.12622059 | 0.17468029 | 0.72258064 | 0.46993756 | NA         |
| Olf1342     | 0.49243511 | 0.12622059 | 0.17468029 | 0.72258064 | 0.46993756 | NA         |
| Mpzl1       | 7112.67905 | 0.12620714 | 0.17378044 | 0.72624481 | 0.46768871 | 0.735927   |
| Gdf3        | 9835.29347 | 0.12617951 | 0.16467523 | 0.7662325  | 0.44353798 | 0.71689626 |
| Uqcrh       | 12855.4982 | 0.12611495 | 0.21294546 | 0.5922406  | 0.55368948 | 0.79271084 |
| Yipf4       | 3750.03721 | 0.12610372 | 0.24676088 | 0.51103612 | 0.60932577 | 0.82590648 |
| Commd6      | 1275.60943 | 0.126066   | 0.20181388 | 0.62466464 | 0.53219119 | 0.77856116 |
| Tnfsf9      | 63.6841523 | 0.12606218 | 0.42610355 | 0.29584871 | 0.76734562 | 0.90649963 |
| 1700039E15F | 0.7844061  | 0.1260159  | 0.22364485 | 0.56346438 | 0.57311871 | NA         |
| Gucy1a3     | 0.7844061  | 0.1260159  | 0.22364485 | 0.56346438 | 0.57311871 | NA         |
| 2310007B03F | 0.7844061  | 0.1260159  | 0.22364485 | 0.56346438 | 0.57311871 | NA         |
| Lrrc18      | 153.476957 | 0.1259613  | 0.39914923 | 0.31557446 | 0.75232553 | 0.90182644 |
| Vcpkmt      | 953.859125 | 0.1259507  | 0.18678375 | 0.67431298 | 0.50011236 | 0.7577302  |
| Fndc9       | 0.48527936 | 0.12593278 | 0.17451247 | 0.72162623 | 0.47052431 | NA         |
| Zdhhc22     | 0.48527936 | 0.12593278 | 0.17451247 | 0.72162623 | 0.47052431 | NA         |
| 7420700N18I | 0.48527936 | 0.12593278 | 0.17451247 | 0.72162623 | 0.47052431 | NA         |
| Pde7b       | 0.48527936 | 0.12593278 | 0.17451247 | 0.72162623 | 0.47052431 | NA         |
| Cmtm2a      | 0.48527936 | 0.12593278 | 0.17451247 | 0.72162623 | 0.47052431 | NA         |
| Vmn1r15     | 0.48527936 | 0.12593278 | 0.17451247 | 0.72162623 | 0.47052431 | NA         |
| A630075F10F | 0.48527936 | 0.12593278 | 0.17451247 | 0.72162623 | 0.47052431 | NA         |
| Tex43       | 0.48527936 | 0.12593278 | 0.17451247 | 0.72162623 | 0.47052431 | NA         |
| Ntf3        | 0.48527936 | 0.12593278 | 0.17451247 | 0.72162623 | 0.47052431 | NA         |
| Mcoln1      | 2501.80807 | 0.12592033 | 0.19750284 | 0.63756209 | 0.52375878 | 0.77166962 |

|             |            |            |            |            |            |            |
|-------------|------------|------------|------------|------------|------------|------------|
| Gm10364     | 33.7770077 | 0.12590238 | 0.38354949 | 0.32825588 | 0.7427182  | 0.89701854 |
| Syn2        | 4.13875761 | 0.12577249 | 0.33857902 | 0.37147161 | 0.7102863  | NA         |
| Mterf1b     | 146.670779 | 0.1257457  | 0.29233638 | 0.43014045 | 0.66709347 | 0.859128   |
| Slc23a3     | 2.18508326 | 0.12570572 | 0.31990689 | 0.39294471 | 0.69436032 | NA         |
| Ift80       | 2724.81425 | 0.12564572 | 0.17010356 | 0.73864251 | 0.46012411 | 0.73073835 |
| A730043L09F | 0.47812362 | 0.12564547 | 0.17434168 | 0.72068523 | 0.4711032  | NA         |
| 3110079O15I | 0.47812362 | 0.12564547 | 0.17434168 | 0.72068523 | 0.4711032  | NA         |
| Tespa1      | 0.47812362 | 0.12564547 | 0.17434168 | 0.72068523 | 0.4711032  | NA         |
| Fcer2a      | 0.47812362 | 0.12564547 | 0.17434168 | 0.72068523 | 0.4711032  | NA         |
| Gsdmc2      | 0.47812362 | 0.12564547 | 0.17434168 | 0.72068523 | 0.4711032  | NA         |
| Cnfn        | 0.47812362 | 0.12564547 | 0.17434168 | 0.72068523 | 0.4711032  | NA         |
| Mir302c     | 0.47812362 | 0.12564547 | 0.17434168 | 0.72068523 | 0.4711032  | NA         |
| 2310015B20F | 1.11100818 | 0.12559402 | 0.26879705 | 0.46724479 | 0.64032475 | NA         |
| Get4        | 3797.53347 | 0.12558541 | 0.16522455 | 0.76008925 | 0.44720124 | 0.72045935 |
| Rpa1        | 26140.4988 | 0.12553889 | 0.14997467 | 0.83706727 | 0.40255476 | 0.68709571 |
| Lzts2       | 2204.32851 | 0.12553404 | 0.25784637 | 0.48685597 | 0.6263604  | 0.83466421 |
| Timm10      | 1705.20419 | 0.12546923 | 0.21886172 | 0.57328082 | 0.56645457 | 0.80234403 |
| Rmdn3       | 2945.91412 | 0.12543992 | 0.19318992 | 0.64930886 | 0.51613876 | 0.7671677  |
| C86187      | 0.47272954 | 0.12541318 | 0.17420456 | 0.719919   | 0.47157487 | NA         |
| Mir7655     | 0.47272954 | 0.12541318 | 0.17420456 | 0.719919   | 0.47157487 | NA         |
| Serpina1e   | 0.47272954 | 0.12541318 | 0.17420456 | 0.719919   | 0.47157487 | NA         |
| Ncam2       | 0.47272954 | 0.12541318 | 0.17420456 | 0.719919   | 0.47157487 | NA         |
| ERCC-00074  | 0.47272954 | 0.12541318 | 0.17420456 | 0.719919   | 0.47157487 | NA         |
| Kmo         | 0.47272954 | 0.12541318 | 0.17420456 | 0.719919   | 0.47157487 | NA         |
| Il15ra      | 0.47272954 | 0.12541318 | 0.17420456 | 0.719919   | 0.47157487 | NA         |
| Hcar1       | 0.47272954 | 0.12541318 | 0.17420456 | 0.719919   | 0.47157487 | NA         |
| Fam71b      | 0.47272954 | 0.12541318 | 0.17420456 | 0.719919   | 0.47157487 | NA         |
| 1700019G24I | 0.47272954 | 0.12541318 | 0.17420456 | 0.719919   | 0.47157487 | NA         |
| Zswim2      | 0.47272954 | 0.12541318 | 0.17420456 | 0.719919   | 0.47157487 | NA         |
| C730027H18I | 0.47272954 | 0.12541318 | 0.17420456 | 0.719919   | 0.47157487 | NA         |
| Mpeg1       | 14.7624756 | 0.12538699 | 0.41322888 | 0.30343229 | 0.76156044 | 0.90466935 |
| Upp2        | 0.47096788 | 0.12535109 | 0.17416788 | 0.71971415 | 0.47170101 | NA         |
| Dntt        | 0.47096788 | 0.12535109 | 0.17416788 | 0.71971415 | 0.47170101 | NA         |
| Cyp4a14     | 0.47096788 | 0.12535109 | 0.17416788 | 0.71971415 | 0.47170101 | NA         |
| Fbxw14      | 0.47096788 | 0.12535109 | 0.17416788 | 0.71971415 | 0.47170101 | NA         |
| Kcnd2       | 3.31789766 | 0.12526228 | 0.34187211 | 0.36640099 | 0.71406588 | NA         |
| 1700030A11F | 1.46585584 | 0.12519174 | 0.31203717 | 0.40120779 | 0.68826715 | NA         |
| Lim2        | 8.07189969 | 0.12516723 | 0.41921729 | 0.29857364 | 0.76526538 | 0.90610594 |
| 1700010D01I | 0.46557379 | 0.12511501 | 0.17402827 | 0.71893496 | 0.472181   | NA         |
| 1700055C04F | 0.46557379 | 0.12511501 | 0.17402827 | 0.71893496 | 0.472181   | NA         |
| Rem1        | 0.46557379 | 0.12511501 | 0.17402827 | 0.71893496 | 0.472181   | NA         |

|             |            |            |            |            |            |            |
|-------------|------------|------------|------------|------------|------------|------------|
| Tm4sf1      | 0.46557379 | 0.12511501 | 0.17402827 | 0.71893496 | 0.472181   | NA         |
| Prss57      | 0.46557379 | 0.12511501 | 0.17402827 | 0.71893496 | 0.472181   | NA         |
| Gys2        | 0.46557379 | 0.12511501 | 0.17402827 | 0.71893496 | 0.472181   | NA         |
| Kcne2       | 0.46557379 | 0.12511501 | 0.17402827 | 0.71893496 | 0.472181   | NA         |
| Adam1b      | 1.5521987  | 0.12505314 | 0.26932902 | 0.46431366 | 0.64242304 | NA         |
| Sgcg        | 2.32362305 | 0.12500509 | 0.34718605 | 0.36005216 | 0.71880812 | NA         |
| Ankrd13c    | 5051.58813 | 0.12497637 | 0.20167972 | 0.61967745 | 0.53547016 | 0.7803571  |
| Cebpz05     | 4353.34591 | 0.12495928 | 0.21719181 | 0.57534066 | 0.56506093 | 0.80125038 |
| Snord49b    | 50.145296  | 0.12489129 | 0.34184757 | 0.36534205 | 0.71485609 | 0.88459673 |
| Tsr3        | 1482.79419 | 0.12483716 | 0.21491488 | 0.58086792 | 0.56132948 | 0.79905798 |
| Myh1        | 0.45841805 | 0.12481213 | 0.17384885 | 0.71793474 | 0.47279753 | NA         |
| Mir200a     | 0.45841805 | 0.12481213 | 0.17384885 | 0.71793474 | 0.47279753 | NA         |
| Gm3376      | 0.45841805 | 0.12481213 | 0.17384885 | 0.71793474 | 0.47279753 | NA         |
| Cnih3       | 0.45841805 | 0.12481213 | 0.17384885 | 0.71793474 | 0.47279753 | NA         |
| Clec4a2     | 0.45841805 | 0.12481213 | 0.17384885 | 0.71793474 | 0.47279753 | NA         |
| 2900057B20F | 0.45841805 | 0.12481213 | 0.17384885 | 0.71793474 | 0.47279753 | NA         |
| Gm11978     | 0.45841805 | 0.12481213 | 0.17384885 | 0.71793474 | 0.47279753 | NA         |
| Foxb2       | 0.45841805 | 0.12481213 | 0.17384885 | 0.71793474 | 0.47279753 | NA         |
| Acox2       | 0.77725036 | 0.12472824 | 0.22314458 | 0.55895707 | 0.57619102 | NA         |
| Mir7229     | 0.77725036 | 0.12472824 | 0.22314458 | 0.55895707 | 0.57619102 | NA         |
| Hoxb3       | 2.3199913  | 0.12463752 | 0.29187552 | 0.42702285 | 0.66936268 | NA         |
| Mrps11      | 1660.18669 | 0.12459021 | 0.18440351 | 0.67563902 | 0.49926986 | 0.75708397 |
| Htr2b       | 0.45302396 | 0.12456902 | 0.17370459 | 0.71713143 | 0.47329301 | NA         |
| 4930468A15f | 0.45302396 | 0.12456902 | 0.17370459 | 0.71713143 | 0.47329301 | NA         |
| Gm10791     | 0.45302396 | 0.12456902 | 0.17370459 | 0.71713143 | 0.47329301 | NA         |
| Pcdhb11     | 0.45302396 | 0.12456902 | 0.17370459 | 0.71713143 | 0.47329301 | NA         |
| Kctd18      | 1187.74778 | 0.12456802 | 0.20430668 | 0.60971093 | 0.54205331 | 0.78505055 |
| 3010001F23F | 4.37764511 | 0.12454281 | 0.39209356 | 0.31763544 | 0.75076149 | NA         |
| H2-M10.1    | 2.22411701 | 0.12438311 | 0.32011961 | 0.38855199 | 0.69760759 | NA         |
| Cd82        | 73.3466734 | 0.12437746 | 0.359422   | 0.34604854 | 0.72930623 | 0.89036279 |
| LOC1026344f | 0.44586822 | 0.1242574  | 0.17351934 | 0.71610114 | 0.4739289  | NA         |
| 4930471G03f | 0.44586822 | 0.1242574  | 0.17351934 | 0.71610114 | 0.4739289  | NA         |
| Krt6a       | 0.44586822 | 0.1242574  | 0.17351934 | 0.71610114 | 0.4739289  | NA         |
| 1700030N03f | 0.44586822 | 0.1242574  | 0.17351934 | 0.71610114 | 0.4739289  | NA         |
| Oit3        | 0.44586822 | 0.1242574  | 0.17351934 | 0.71610114 | 0.4739289  | NA         |
| Ctrc        | 0.44586822 | 0.1242574  | 0.17351934 | 0.71610114 | 0.4739289  | NA         |
| Cx3cl1      | 179.899558 | 0.1242447  | 0.37502118 | 0.33130048 | 0.74041753 | 0.89565792 |
| Gna12       | 1545.14388 | 0.12416867 | 0.22777253 | 0.54514333 | 0.58565494 | 0.81230111 |
| Lrrc10b     | 12.6727363 | 0.12411997 | 0.42023018 | 0.29536187 | 0.76771746 | 0.90649963 |
| Wdr91       | 1965.14109 | 0.12405416 | 0.17609195 | 0.70448513 | 0.48113071 | 0.7445399  |
| Dnajb12     | 1846.97636 | 0.12398392 | 0.18569636 | 0.66767019 | 0.50434414 | 0.76042813 |



|             |            |            |            |            |            |            |
|-------------|------------|------------|------------|------------|------------|------------|
| Spata2l     | 73.7831556 | 0.12391069 | 0.41105528 | 0.30144532 | 0.76307494 | 0.90522666 |
| Ucp3        | 22.969473  | 0.12390166 | 0.43091631 | 0.28753067 | 0.77370602 | 0.9098882  |
| 2410004I01R | 22.1906708 | 0.12384977 | 0.42428432 | 0.29190278 | 0.77036096 | 0.90826254 |
| Gm12794     | 33.3845293 | 0.12378582 | 0.41407321 | 0.2989467  | 0.76498072 | 0.90610594 |
| Samd12      | 47.3475153 | 0.12371672 | 0.39651127 | 0.31201311 | 0.75503056 | 0.90191816 |
| Tmem190     | 0.43331839 | 0.12368643 | 0.17317897 | 0.71421161 | 0.47509634 | NA         |
| Krtap5-5    | 0.43331839 | 0.12368643 | 0.17317897 | 0.71421161 | 0.47509634 | NA         |
| Col4a4      | 0.43331839 | 0.12368643 | 0.17317897 | 0.71421161 | 0.47509634 | NA         |
| Gm13807     | 0.43331839 | 0.12368643 | 0.17317897 | 0.71421161 | 0.47509634 | NA         |
| Krt24       | 0.43331839 | 0.12368643 | 0.17317897 | 0.71421161 | 0.47509634 | NA         |
| Ddx56       | 7160.84165 | 0.12356822 | 0.19227358 | 0.64266873 | 0.52043908 | 0.76986886 |
| Ptpra       | 2807.731   | 0.12345424 | 0.1919176  | 0.64326688 | 0.52005095 | 0.76986886 |
| Anxa13      | 1.93628335 | 0.1233514  | 0.3044058  | 0.40522026 | 0.68531561 | NA         |
| Fam188b     | 288.392254 | 0.12333978 | 0.28825694 | 0.4278814  | 0.66873747 | 0.8600411  |
| Wipf3       | 85.8407651 | 0.12333579 | 0.34207768 | 0.36054909 | 0.71843656 | 0.88550762 |
| Gm13178     | 2.0160845  | 0.12332406 | 0.27843749 | 0.44291471 | 0.65782743 | NA         |
| Cecr5       | 2036.10983 | 0.12331396 | 0.17403176 | 0.70857157 | 0.47859038 | 0.74302874 |
| A230020J21R | 2.65500519 | 0.12319914 | 0.35911713 | 0.34306116 | 0.73155245 | NA         |
| 4933440J02R | 1.41897865 | 0.12313152 | 0.22793758 | 0.54019842 | 0.5890602  | NA         |
| Hcls1       | 3.75490601 | 0.12294394 | 0.37816452 | 0.32510703 | 0.74510007 | NA         |
| Ythdc1      | 8164.99474 | 0.12289452 | 0.2230843  | 0.55088824 | 0.58171029 | 0.80984021 |
| Bcas2       | 12941.1956 | 0.12289333 | 0.17294663 | 0.71058529 | 0.47734126 | 0.74223918 |
| Ttn         | 2231.95323 | 0.12287925 | 0.33477858 | 0.36704634 | 0.71358445 | 0.88418475 |
| Fkbp5       | 13939.9742 | 0.12276671 | 0.18392056 | 0.66749857 | 0.50445372 | 0.7604459  |
| Casp14      | 58.949474  | 0.12268825 | 0.35925287 | 0.34150945 | 0.73272009 | 0.89214924 |
| Casz1       | 375.215055 | 0.12256956 | 0.29633124 | 0.41362348 | 0.67914987 | 0.86604267 |
| Prph2       | 7.5242036  | 0.12250244 | 0.41507841 | 0.29513083 | 0.76789394 | 0.90649963 |
| Ccdc115     | 2320.7728  | 0.1224838  | 0.26699323 | 0.45875246 | 0.64641194 | 0.84705994 |
| Cacul1      | 6185.28817 | 0.12246624 | 0.15972267 | 0.76674299 | 0.44323434 | 0.71664974 |
| Ldlrad2     | 0.76470053 | 0.12242389 | 0.22225083 | 0.55083658 | 0.58174571 | NA         |
| Arl15       | 6038.40157 | 0.12240745 | 0.15926466 | 0.76857888 | 0.44214335 | 0.7159317  |
| Oc90        | 213.82843  | 0.12240204 | 0.38704182 | 0.31625016 | 0.75181264 | 0.90161989 |
| Tmem51os1   | 45.7205203 | 0.12240185 | 0.37933065 | 0.32267852 | 0.74693872 | 0.89975744 |
| Mien1       | 2032.88676 | 0.12229721 | 0.23562033 | 0.51904355 | 0.60373037 | 0.82288924 |
| Phf12       | 5059.14722 | 0.12214761 | 0.26550882 | 0.46005107 | 0.64547957 | 0.84629525 |
| Snx18       | 8493.22746 | 0.12214223 | 0.22058775 | 0.55371265 | 0.57977552 | 0.80831465 |
| Abcc10      | 872.003878 | 0.12212296 | 0.23374785 | 0.52245596 | 0.6013529  | 0.82154763 |
| D5Ertd605e  | 513.611508 | 0.12200025 | 0.43075915 | 0.28322149 | 0.77700705 | 0.91146087 |
| Ptprs       | 4966.97281 | 0.12194625 | 0.19247338 | 0.63357464 | 0.52635846 | 0.77414646 |
| Eln         | 16.0332133 | 0.12190429 | 0.42758172 | 0.28510173 | 0.7755662  | 0.91038874 |
| Ston1       | 622.83964  | 0.12183302 | 0.22617429 | 0.53866874 | 0.59011544 | 0.81536075 |

|             |            |            |            |            |            |            |
|-------------|------------|------------|------------|------------|------------|------------|
| Pcnx        | 1902.22865 | 0.12182892 | 0.24003055 | 0.50755588 | 0.61176484 | 0.8270499  |
| Bet1l       | 1624.40041 | 0.12182076 | 0.20757329 | 0.5868807  | 0.55728383 | 0.79587849 |
| Zfp687      | 4406.72031 | 0.12180599 | 0.20655043 | 0.5897155  | 0.5553814  | 0.79464532 |
| Msemb       | 1.78044846 | 0.12179426 | 0.26867459 | 0.45331514 | 0.65032183 | NA         |
| Kcnk7       | 7.84140787 | 0.12173377 | 0.42672805 | 0.28527249 | 0.77543539 | 0.91030389 |
| Ier5l       | 1371.98589 | 0.12170815 | 0.23101853 | 0.52683285 | 0.59830967 | 0.81984777 |
| Sntg1       | 2.482374   | 0.12168563 | 0.31672601 | 0.38419841 | 0.7008314  | NA         |
| Srp9        | 3103.85072 | 0.12168493 | 0.1882427  | 0.64642579 | 0.51800365 | 0.76808698 |
| Uqcr10      | 13516.6054 | 0.12160758 | 0.23875717 | 0.5093358  | 0.61051687 | 0.82628478 |
| Tmem258     | 5262.77762 | 0.12159834 | 0.19961976 | 0.6091498  | 0.54242515 | 0.78520513 |
| Trim29      | 5.792493   | 0.12156595 | 0.41556531 | 0.29253152 | 0.76988027 | NA         |
| Accsl       | 4098.47745 | 0.12154101 | 0.29102294 | 0.41763378 | 0.67621489 | 0.864488   |
| Ndufaf7     | 2039.61114 | 0.12136328 | 0.2151977  | 0.56396181 | 0.57278012 | 0.80616379 |
| Ect2l       | 1.44615027 | 0.12131303 | 0.31164547 | 0.38926614 | 0.69707928 | NA         |
| Ppp2r3c     | 2392.90609 | 0.12128227 | 0.16406303 | 0.73924195 | 0.45976009 | 0.73030941 |
| Lims2       | 34.5719198 | 0.12094321 | 0.4243707  | 0.28499425 | 0.77564855 | 0.91041668 |
| Cnpy4       | 2016.42009 | 0.12093873 | 0.20133273 | 0.60069085 | 0.54804591 | 0.78881129 |
| Mppe1       | 1210.3777  | 0.12092796 | 0.26166471 | 0.46214854 | 0.6439748  | 0.84524411 |
| 8430427H17l | 2432.17506 | 0.12089495 | 0.24585188 | 0.49173897 | 0.62290389 | 0.83253766 |
| Neurl1b     | 39.3328575 | 0.12088359 | 0.42927957 | 0.28159643 | 0.77825298 | 0.91216552 |
| Llg12       | 10669.1133 | 0.12062844 | 0.18384405 | 0.65614548 | 0.51173053 | 0.76525833 |
| Plekhj1     | 2370.56102 | 0.12061835 | 0.17989318 | 0.67049987 | 0.50253919 | 0.7592526  |
| E2f3        | 3983.00344 | 0.12061779 | 0.22863454 | 0.52755714 | 0.59780674 | 0.81972425 |
| Npepl1      | 1864.26959 | 0.12059062 | 0.2431367  | 0.49597871 | 0.61990943 | 0.83138912 |
| Mfap1b      | 404.268374 | 0.12057816 | 0.19431468 | 0.62053036 | 0.53490867 | 0.78004171 |
| Ssmem1      | 14.2211762 | 0.12052282 | 0.43220024 | 0.27885876 | 0.78035322 | 0.91308099 |
| Klk10       | 321.40058  | 0.12048433 | 0.36801294 | 0.32739156 | 0.74337175 | 0.89745937 |
| Nphs1os     | 203.70145  | 0.12045355 | 0.39228236 | 0.30705829 | 0.75879901 | 0.90331943 |
| Corin       | 4.2982088  | 0.12040441 | 0.39198577 | 0.30716526 | 0.75871758 | NA         |
| Zfp408      | 1220.56001 | 0.12031295 | 0.24298429 | 0.49514703 | 0.62049634 | 0.83154492 |
| Sfpq        | 31346.1784 | 0.12026715 | 0.21877697 | 0.54972492 | 0.58250806 | 0.81000763 |
| Sp5         | 587.982999 | 0.12021163 | 0.38338365 | 0.3135544  | 0.7538595  | 0.90191816 |
| Al846148    | 2905.91489 | 0.12018395 | 0.19707128 | 0.60985017 | 0.54196106 | 0.78505055 |
| Abrac1      | 2074.86735 | 0.12014545 | 0.20433095 | 0.58799438 | 0.55653607 | 0.7956143  |
| AU015228    | 12.5917867 | 0.12012693 | 0.39734619 | 0.3023231  | 0.76240577 | 0.90498047 |
| Atad2b      | 7591.05755 | 0.12004855 | 0.23257344 | 0.51617482 | 0.60573232 | 0.82418428 |
| Bora        | 2985.90853 | 0.12004195 | 0.1591097  | 0.75446026 | 0.4505729  | 0.72293741 |
| 1600012H06l | 1905.16758 | 0.11998117 | 0.1652654  | 0.72599085 | 0.46784438 | 0.7360089  |
| Evl         | 1710.88688 | 0.11992062 | 0.15771229 | 0.76037587 | 0.44702994 | 0.72037167 |
| Tle6        | 576.426578 | 0.11991947 | 0.28846515 | 0.41571561 | 0.67761812 | 0.86555439 |
| Baiap2l2    | 60.7583007 | 0.11974048 | 0.34097373 | 0.35117215 | 0.7254592  | 0.88922398 |

|             |            |            |            |            |            |            |
|-------------|------------|------------|------------|------------|------------|------------|
| Ncstn       | 4668.71343 | 0.11966893 | 0.21363222 | 0.5601633  | 0.57536806 | 0.80710344 |
| Drc1        | 26.5900277 | 0.11966311 | 0.4146516  | 0.28858713 | 0.77289735 | 0.90962818 |
| Dyrk3       | 4083.75992 | 0.11964465 | 0.22543378 | 0.53073079 | 0.59560534 | 0.8185823  |
| Flt4        | 174.275573 | 0.11957633 | 0.35144398 | 0.34024295 | 0.73367358 | 0.892514   |
| As3mt       | 1012.45407 | 0.11955611 | 0.24042275 | 0.49727453 | 0.61899547 | 0.83090659 |
| Kcnj15      | 1.96344839 | 0.11951217 | 0.23650724 | 0.5053214  | 0.61333312 | NA         |
| Mir7049     | 0.80648736 | 0.11945666 | 0.2246971  | 0.53163418 | 0.59497939 | NA         |
| Hectd1      | 8192.15795 | 0.11936543 | 0.221442   | 0.53903701 | 0.58986132 | 0.81515448 |
| Cryba4      | 3.46895859 | 0.11935728 | 0.37930561 | 0.31467312 | 0.75300986 | NA         |
| Lemd3       | 3518.34761 | 0.11931426 | 0.19078958 | 0.62537097 | 0.53172761 | 0.7783431  |
| Cir1        | 456.244542 | 0.119276   | 0.18702156 | 0.63776607 | 0.52362597 | 0.77162015 |
| Gm20751     | 39.1593835 | 0.1190898  | 0.42780751 | 0.2783724  | 0.78072651 | 0.9131063  |
| Zyg11b      | 7600.23923 | 0.11908453 | 0.23691763 | 0.50264107 | 0.61521665 | 0.82953469 |
| Sco2        | 177.230807 | 0.11906833 | 0.26572786 | 0.44808372 | 0.65409277 | 0.85168012 |
| Hesx1       | 1015.83259 | 0.11904494 | 0.26205612 | 0.45427269 | 0.64963257 | 0.84900546 |
| D630039A03  | 678.093126 | 0.11903031 | 0.31980578 | 0.37219562 | 0.70974721 | 0.88183819 |
| Fam181a     | 5.8624356  | 0.11896903 | 0.39559164 | 0.30073697 | 0.76361507 | NA         |
| Lrrfip1     | 1395.1292  | 0.1189564  | 0.36016826 | 0.33028007 | 0.74118835 | 0.89614524 |
| Gm8994      | 28.2521362 | 0.11889032 | 0.40177556 | 0.29591227 | 0.76729708 | 0.90649963 |
| Ccdc166     | 389.408738 | 0.11876795 | 0.24663796 | 0.48154771 | 0.63012728 | 0.83674403 |
| Fadd        | 432.150385 | 0.118737   | 0.21886148 | 0.54252125 | 0.58745947 | 0.81340776 |
| Cenpj       | 1677.55182 | 0.11870224 | 0.17196634 | 0.69026437 | 0.49002795 | 0.75100272 |
| Fads6       | 472.888958 | 0.11870062 | 0.2574362  | 0.46108754 | 0.6447358  | 0.84574327 |
| H2-Ke2      | 4326.99082 | 0.11864971 | 0.19003492 | 0.62435742 | 0.53239288 | 0.77863648 |
| Rpap2       | 2861.36611 | 0.1186469  | 0.16525398 | 0.71796694 | 0.47277767 | 0.73930088 |
| Arl13a      | 0.96825671 | 0.11863215 | 0.20502888 | 0.57861191 | 0.56285107 | NA         |
| Gabbr1      | 4778.70596 | 0.11860523 | 0.18171544 | 0.65269758 | 0.51395127 | 0.76592775 |
| Nr2e3       | 32.6295248 | 0.11845158 | 0.4322477  | 0.27403634 | 0.7840567  | 0.9146936  |
| D4Ertd617e  | 1.15957336 | 0.11841549 | 0.27331019 | 0.4332641  | 0.66482291 | NA         |
| Mrpl34      | 2348.19232 | 0.11840515 | 0.2118005  | 0.55904093 | 0.57613379 | 0.80734073 |
| Gm5635      | 88.0707806 | 0.11830822 | 0.38291549 | 0.30896693 | 0.75734669 | 0.90301693 |
| Card14      | 67.0278788 | 0.1182526  | 0.42404906 | 0.27886537 | 0.78034814 | 0.91308099 |
| Mia         | 243.53464  | 0.1182466  | 0.30954725 | 0.38199855 | 0.70246244 | 0.87879687 |
| Lbp         | 36.0844261 | 0.11796802 | 0.41776341 | 0.28237996 | 0.77765218 | 0.91194246 |
| 1810044D09I | 91.9414745 | 0.11777867 | 0.31690332 | 0.3716549  | 0.7101498  | 0.88195802 |
| Nkd1        | 99.1801913 | 0.11776783 | 0.38899172 | 0.30275151 | 0.76207924 | 0.9048709  |
| Edf1        | 5848.14375 | 0.11776439 | 0.20593033 | 0.57186522 | 0.56741329 | 0.8030103  |
| Vps33a      | 2807.09991 | 0.11772988 | 0.21320356 | 0.55219469 | 0.58081497 | 0.80883439 |
| Ano5        | 0.93600131 | 0.11770719 | 0.20580694 | 0.57193011 | 0.56736932 | NA         |
| Arhgef25    | 1873.26124 | 0.11769891 | 0.29631604 | 0.39720735 | 0.69121456 | 0.87369566 |
| Ublcp1      | 2603.22745 | 0.11761697 | 0.17314898 | 0.67928193 | 0.49695925 | 0.7560535  |

|            |            |            |            |            |            |            |
|------------|------------|------------|------------|------------|------------|------------|
| Snai2      | 44.5548488 | 0.11747826 | 0.39771775 | 0.29538099 | 0.76770285 | 0.90649963 |
| Cnrip1     | 1.29861874 | 0.11743095 | 0.25185947 | 0.46625587 | 0.64103236 | NA         |
| Eif2b5     | 28125.9124 | 0.11725552 | 0.19951919 | 0.58769045 | 0.55674009 | 0.79571116 |
| Raet1d     | 7.35053616 | 0.11724661 | 0.42699448 | 0.27458577 | 0.7836345  | 0.91442498 |
| Ebpl       | 1403.11659 | 0.11714913 | 0.2756235  | 0.42503317 | 0.6708125  | 0.86149188 |
| Pcdhb18    | 0.95570688 | 0.11703844 | 0.20432129 | 0.57281569 | 0.5667695  | NA         |
| Pnkp       | 2109.58571 | 0.11701546 | 0.20290628 | 0.57669708 | 0.5641441  | 0.80062448 |
| Frzb       | 9.2986957  | 0.11700344 | 0.38874202 | 0.30097964 | 0.76343002 | 0.90530857 |
| Emilin3    | 174.544716 | 0.11689358 | 0.38664997 | 0.30232404 | 0.76240505 | 0.90498047 |
| Arhgef37   | 15.6827335 | 0.11683232 | 0.42964269 | 0.27192904 | 0.78567658 | 0.91560784 |
| Plxnb1     | 959.214886 | 0.11681775 | 0.2967096  | 0.39371071 | 0.69379463 | 0.87496374 |
| Psmc3      | 19472.8783 | 0.11674669 | 0.16672414 | 0.70023865 | 0.48377828 | 0.74650089 |
| Clvs1      | 13.9529569 | 0.11665917 | 0.43154426 | 0.27032957 | 0.78690672 | 0.9162057  |
| Slc45a4    | 4771.52518 | 0.1164687  | 0.24029839 | 0.48468365 | 0.62790077 | 0.83543543 |
| Ramp1      | 2.32538538 | 0.1164394  | 0.28280338 | 0.41173271 | 0.68053534 | NA         |
| Cnih4      | 4133.06292 | 0.11640028 | 0.20928483 | 0.55618114 | 0.57808703 | 0.80771125 |
| Eepd1      | 219.540919 | 0.11639683 | 0.40603628 | 0.28666609 | 0.77436801 | 0.91001261 |
| 4930471M09 | 2.27807628 | 0.11628072 | 0.31933256 | 0.36413674 | 0.7157559  | NA         |
| Rpph1      | 57.9325658 | 0.11623782 | 0.3513633  | 0.33081947 | 0.74078085 | 0.89593118 |
| Elmod1     | 4.73427056 | 0.11623033 | 0.3624993  | 0.32063601 | 0.74848625 | NA         |
| Prosc      | 4672.55181 | 0.11608382 | 0.16327812 | 0.71095762 | 0.4771105  | 0.74210296 |
| Cyp2w1     | 1.14702353 | 0.11605028 | 0.27285278 | 0.42532197 | 0.67060198 | NA         |
| 1-Mar      | 1.14702353 | 0.11605028 | 0.27285278 | 0.42532197 | 0.67060198 | NA         |
| Vaultrc5   | 2.23327105 | 0.116007   | 0.32610634 | 0.35573365 | 0.72204004 | NA         |
| Ngdn       | 6109.50988 | 0.11582813 | 0.19591812 | 0.5912068  | 0.55438186 | 0.79362905 |
| Scd1       | 31367.2082 | 0.11580059 | 0.1645856  | 0.70358885 | 0.48168886 | 0.74482882 |
| Polr2k     | 433.291237 | 0.11579747 | 0.34551264 | 0.33514683 | 0.73751433 | 0.89415198 |
| Slbp       | 9432.20312 | 0.11576875 | 0.16093951 | 0.71933083 | 0.4719371  | 0.73859646 |
| Mpv17      | 3344.8277  | 0.11568402 | 0.15335569 | 0.754351   | 0.45063849 | 0.72293741 |
| Npy5r      | 0.32829007 | 0.11568031 | 0.16827265 | 0.68745761 | 0.49179441 | NA         |
| Mmp27      | 0.32829007 | 0.11568031 | 0.16827265 | 0.68745761 | 0.49179441 | NA         |
| Gm15471    | 0.32829007 | 0.11568031 | 0.16827265 | 0.68745761 | 0.49179441 | NA         |
| Nrg3       | 0.32829007 | 0.11568031 | 0.16827265 | 0.68745761 | 0.49179441 | NA         |
| Tex29      | 0.32829007 | 0.11568031 | 0.16827265 | 0.68745761 | 0.49179441 | NA         |
| Ces1d      | 0.32829007 | 0.11568031 | 0.16827265 | 0.68745761 | 0.49179441 | NA         |
| Trpm8      | 0.32829007 | 0.11568031 | 0.16827265 | 0.68745761 | 0.49179441 | NA         |
| Txk        | 0.32829007 | 0.11568031 | 0.16827265 | 0.68745761 | 0.49179441 | NA         |
| Hapln2     | 0.32829007 | 0.11568031 | 0.16827265 | 0.68745761 | 0.49179441 | NA         |
| Gpr123     | 0.32829007 | 0.11568031 | 0.16827265 | 0.68745761 | 0.49179441 | NA         |
| Ace2       | 0.32829007 | 0.11568031 | 0.16827265 | 0.68745761 | 0.49179441 | NA         |
| Sva        | 0.32829007 | 0.11568031 | 0.16827265 | 0.68745761 | 0.49179441 | NA         |

|             |            |            |            |            |            |    |
|-------------|------------|------------|------------|------------|------------|----|
| S100a9      | 0.32829007 | 0.11568031 | 0.16827265 | 0.68745761 | 0.49179441 | NA |
| Hsd3b6      | 0.32829007 | 0.11568031 | 0.16827265 | 0.68745761 | 0.49179441 | NA |
| Mlip        | 0.32829007 | 0.11568031 | 0.16827265 | 0.68745761 | 0.49179441 | NA |
| ERCC-00171  | 0.32829007 | 0.11568031 | 0.16827265 | 0.68745761 | 0.49179441 | NA |
| Rfpl4b      | 0.32829007 | 0.11568031 | 0.16827265 | 0.68745761 | 0.49179441 | NA |
| Tmprss11a   | 0.32829007 | 0.11568031 | 0.16827265 | 0.68745761 | 0.49179441 | NA |
| 2900079G21l | 0.32829007 | 0.11568031 | 0.16827265 | 0.68745761 | 0.49179441 | NA |
| A230108P19f | 0.32829007 | 0.11568031 | 0.16827265 | 0.68745761 | 0.49179441 | NA |
| A630033H20  | 0.32829007 | 0.11568031 | 0.16827265 | 0.68745761 | 0.49179441 | NA |
| P2ry10      | 0.32829007 | 0.11568031 | 0.16827265 | 0.68745761 | 0.49179441 | NA |
| 2610207O16l | 0.32829007 | 0.11568031 | 0.16827265 | 0.68745761 | 0.49179441 | NA |
| Grip1os2    | 0.32829007 | 0.11568031 | 0.16827265 | 0.68745761 | 0.49179441 | NA |
| Krt4        | 0.32829007 | 0.11568031 | 0.16827265 | 0.68745761 | 0.49179441 | NA |
| Serpib9g    | 0.32829007 | 0.11568031 | 0.16827265 | 0.68745761 | 0.49179441 | NA |
| 4930428D18l | 0.32829007 | 0.11568031 | 0.16827265 | 0.68745761 | 0.49179441 | NA |
| Serpib9f    | 0.32829007 | 0.11568031 | 0.16827265 | 0.68745761 | 0.49179441 | NA |
| Muc15       | 0.32829007 | 0.11568031 | 0.16827265 | 0.68745761 | 0.49179441 | NA |
| Pcdh11x     | 0.32829007 | 0.11568031 | 0.16827265 | 0.68745761 | 0.49179441 | NA |
| Zfp804a     | 0.32829007 | 0.11568031 | 0.16827265 | 0.68745761 | 0.49179441 | NA |
| Gsdmc3      | 0.32829007 | 0.11568031 | 0.16827265 | 0.68745761 | 0.49179441 | NA |
| Rfpl4       | 0.32829007 | 0.11568031 | 0.16827265 | 0.68745761 | 0.49179441 | NA |
| Gm16287     | 0.32829007 | 0.11568031 | 0.16827265 | 0.68745761 | 0.49179441 | NA |
| Adarb2      | 0.32829007 | 0.11568031 | 0.16827265 | 0.68745761 | 0.49179441 | NA |
| Gm10584     | 0.32829007 | 0.11568031 | 0.16827265 | 0.68745761 | 0.49179441 | NA |
| ligp1       | 0.32829007 | 0.11568031 | 0.16827265 | 0.68745761 | 0.49179441 | NA |
| C530044C16f | 0.32829007 | 0.11568031 | 0.16827265 | 0.68745761 | 0.49179441 | NA |
| 9930111J21R | 0.32829007 | 0.11568031 | 0.16827265 | 0.68745761 | 0.49179441 | NA |
| Gm19277     | 0.32829007 | 0.11568031 | 0.16827265 | 0.68745761 | 0.49179441 | NA |
| Calm4       | 0.32829007 | 0.11568031 | 0.16827265 | 0.68745761 | 0.49179441 | NA |
| Cd200r1     | 0.32829007 | 0.11568031 | 0.16827265 | 0.68745761 | 0.49179441 | NA |
| Cxcl2       | 0.32829007 | 0.11568031 | 0.16827265 | 0.68745761 | 0.49179441 | NA |
| Ifit3       | 0.32829007 | 0.11568031 | 0.16827265 | 0.68745761 | 0.49179441 | NA |
| Cyp17a1     | 0.32829007 | 0.11568031 | 0.16827265 | 0.68745761 | 0.49179441 | NA |
| Slitrk6     | 0.32829007 | 0.11568031 | 0.16827265 | 0.68745761 | 0.49179441 | NA |
| Serpib9d    | 0.32829007 | 0.11568031 | 0.16827265 | 0.68745761 | 0.49179441 | NA |
| Gm17359     | 0.32829007 | 0.11568031 | 0.16827265 | 0.68745761 | 0.49179441 | NA |
| Adam18      | 0.32829007 | 0.11568031 | 0.16827265 | 0.68745761 | 0.49179441 | NA |
| Fcgr4       | 0.32829007 | 0.11568031 | 0.16827265 | 0.68745761 | 0.49179441 | NA |
| 4932411N23l | 0.32829007 | 0.11568031 | 0.16827265 | 0.68745761 | 0.49179441 | NA |
| Skint7      | 0.32829007 | 0.11568031 | 0.16827265 | 0.68745761 | 0.49179441 | NA |
| Mef2c       | 0.32829007 | 0.11568031 | 0.16827265 | 0.68745761 | 0.49179441 | NA |

|             |            |            |            |            |            |            |
|-------------|------------|------------|------------|------------|------------|------------|
| 4921515E04F | 0.32829007 | 0.11568031 | 0.16827265 | 0.68745761 | 0.49179441 | NA         |
| 9830107B12F | 0.32829007 | 0.11568031 | 0.16827265 | 0.68745761 | 0.49179441 | NA         |
| Satl1       | 0.32829007 | 0.11568031 | 0.16827265 | 0.68745761 | 0.49179441 | NA         |
| Akap14      | 0.32829007 | 0.11568031 | 0.16827265 | 0.68745761 | 0.49179441 | NA         |
| Sln2        | 0.32829007 | 0.11568031 | 0.16827265 | 0.68745761 | 0.49179441 | NA         |
| Mcpt8       | 0.32829007 | 0.11568031 | 0.16827265 | 0.68745761 | 0.49179441 | NA         |
| Clec4n      | 0.32829007 | 0.11568031 | 0.16827265 | 0.68745761 | 0.49179441 | NA         |
| Olf601      | 0.32829007 | 0.11568031 | 0.16827265 | 0.68745761 | 0.49179441 | NA         |
| Nt5c1a      | 0.32829007 | 0.11568031 | 0.16827265 | 0.68745761 | 0.49179441 | NA         |
| Mir7073     | 0.32829007 | 0.11568031 | 0.16827265 | 0.68745761 | 0.49179441 | NA         |
| Slc15a5     | 0.32829007 | 0.11568031 | 0.16827265 | 0.68745761 | 0.49179441 | NA         |
| Apol9a      | 0.32829007 | 0.11568031 | 0.16827265 | 0.68745761 | 0.49179441 | NA         |
| P4ha2       | 531.696338 | 0.11566875 | 0.30168506 | 0.38340896 | 0.70141656 | 0.87816834 |
| Mrps18a     | 1927.65455 | 0.11565538 | 0.18776269 | 0.61596571 | 0.53791715 | 0.78149754 |
| Psm13       | 11317.7911 | 0.11563026 | 0.1810098  | 0.63880662 | 0.52294874 | 0.77134419 |
| Spata25     | 1.62800258 | 0.11552891 | 0.25948445 | 0.44522479 | 0.65615731 | NA         |
| Astn1       | 9.64422006 | 0.1155277  | 0.36971285 | 0.31247953 | 0.75467612 | 0.90191816 |
| Gpr45       | 1.76212715 | 0.11551936 | 0.27031629 | 0.42734887 | 0.66912524 | NA         |
| Mir181c     | 1.76212715 | 0.11551936 | 0.27031629 | 0.42734887 | 0.66912524 | NA         |
| Ncan        | 89.9498426 | 0.11538897 | 0.40207916 | 0.28698072 | 0.77412708 | 0.90992938 |
| Ube2d3      | 17988.6287 | 0.11531028 | 0.17469034 | 0.66008387 | 0.50920001 | 0.76389826 |
| Rnf115      | 5895.49577 | 0.1152813  | 0.16803895 | 0.68603916 | 0.49268841 | 0.75285423 |
| Slit2       | 1595.79739 | 0.1152731  | 0.37807239 | 0.30489689 | 0.76044468 | 0.90431969 |
| Prl8a1      | 0.32113433 | 0.1151884  | 0.16796203 | 0.68580026 | 0.49283907 | NA         |
| Fam19a2     | 0.32113433 | 0.1151884  | 0.16796203 | 0.68580026 | 0.49283907 | NA         |
| Hrasls      | 0.32113433 | 0.1151884  | 0.16796203 | 0.68580026 | 0.49283907 | NA         |
| Adra1b      | 0.32113433 | 0.1151884  | 0.16796203 | 0.68580026 | 0.49283907 | NA         |
| Otp         | 0.32113433 | 0.1151884  | 0.16796203 | 0.68580026 | 0.49283907 | NA         |
| Abca9       | 0.32113433 | 0.1151884  | 0.16796203 | 0.68580026 | 0.49283907 | NA         |
| Gm17660     | 0.32113433 | 0.1151884  | 0.16796203 | 0.68580026 | 0.49283907 | NA         |
| 4930430D24I | 0.32113433 | 0.1151884  | 0.16796203 | 0.68580026 | 0.49283907 | NA         |
| Mir365-1    | 0.32113433 | 0.1151884  | 0.16796203 | 0.68580026 | 0.49283907 | NA         |
| B3galt2     | 0.32113433 | 0.1151884  | 0.16796203 | 0.68580026 | 0.49283907 | NA         |
| Impg1       | 0.32113433 | 0.1151884  | 0.16796203 | 0.68580026 | 0.49283907 | NA         |
| Mir200b     | 0.32113433 | 0.1151884  | 0.16796203 | 0.68580026 | 0.49283907 | NA         |
| Tmem181c-p  | 0.32113433 | 0.1151884  | 0.16796203 | 0.68580026 | 0.49283907 | NA         |
| Rgs4        | 0.32113433 | 0.1151884  | 0.16796203 | 0.68580026 | 0.49283907 | NA         |
| Gja10       | 0.32113433 | 0.1151884  | 0.16796203 | 0.68580026 | 0.49283907 | NA         |
| A530099J19R | 0.32113433 | 0.1151884  | 0.16796203 | 0.68580026 | 0.49283907 | NA         |
| Ang4        | 0.32113433 | 0.1151884  | 0.16796203 | 0.68580026 | 0.49283907 | NA         |
| Mir26a-2    | 0.32113433 | 0.1151884  | 0.16796203 | 0.68580026 | 0.49283907 | NA         |

|             |            |            |            |            |            |            |
|-------------|------------|------------|------------|------------|------------|------------|
| B230312C02F | 0.32113433 | 0.1151884  | 0.16796203 | 0.68580026 | 0.49283907 | NA         |
| Crtam       | 0.32113433 | 0.1151884  | 0.16796203 | 0.68580026 | 0.49283907 | NA         |
| Wbscr28     | 0.32113433 | 0.1151884  | 0.16796203 | 0.68580026 | 0.49283907 | NA         |
| 8430426J06R | 0.32113433 | 0.1151884  | 0.16796203 | 0.68580026 | 0.49283907 | NA         |
| Sh2d1b1     | 0.32113433 | 0.1151884  | 0.16796203 | 0.68580026 | 0.49283907 | NA         |
| Serpina3f   | 0.32113433 | 0.1151884  | 0.16796203 | 0.68580026 | 0.49283907 | NA         |
| Ptprt       | 10.5431409 | 0.11514273 | 0.41641874 | 0.27650708 | 0.78215862 | 0.91378174 |
| Hs6st3      | 37.6866802 | 0.11505355 | 0.42187734 | 0.27271801 | 0.78506999 | 0.9153312  |
| Rnf167      | 5166.05077 | 0.11502828 | 0.22983838 | 0.50047465 | 0.6167409  | 0.83032065 |
| 1700042G07I | 5.87858308 | 0.11500674 | 0.40200412 | 0.28608349 | 0.77481417 | NA         |
| Stx17       | 593.853027 | 0.11494625 | 0.23006734 | 0.49962005 | 0.61734264 | 0.83032065 |
| Nxn         | 6426.97238 | 0.11493434 | 0.26267269 | 0.43755727 | 0.66170725 | 0.85575442 |
| 3010033K07F | 0.91453408 | 0.11481795 | 0.20449322 | 0.56147557 | 0.57447338 | NA         |
| Abca1       | 1346.05528 | 0.11479632 | 0.36685304 | 0.31292181 | 0.75434007 | 0.90191816 |
| Mir7051     | 5.69230469 | 0.1147749  | 0.38186679 | 0.30056267 | 0.763748   | NA         |
| Slc38a9     | 806.314167 | 0.11474631 | 0.25931338 | 0.44250052 | 0.65812705 | 0.85360887 |
| Mrpl43      | 3516.87169 | 0.1147451  | 0.17694678 | 0.64847235 | 0.51667949 | 0.767621   |
| Olfr472     | 0.31397859 | 0.11468681 | 0.16764496 | 0.68410535 | 0.49390864 | NA         |
| Mir6939     | 0.31397859 | 0.11468681 | 0.16764496 | 0.68410535 | 0.49390864 | NA         |
| 6030466F02F | 0.31397859 | 0.11468681 | 0.16764496 | 0.68410535 | 0.49390864 | NA         |
| D830013O20  | 0.31397859 | 0.11468681 | 0.16764496 | 0.68410535 | 0.49390864 | NA         |
| Opn1mw      | 0.31397859 | 0.11468681 | 0.16764496 | 0.68410535 | 0.49390864 | NA         |
| Gm19461     | 0.31397859 | 0.11468681 | 0.16764496 | 0.68410535 | 0.49390864 | NA         |
| Sln         | 0.31397859 | 0.11468681 | 0.16764496 | 0.68410535 | 0.49390864 | NA         |
| Slc22a8     | 0.31397859 | 0.11468681 | 0.16764496 | 0.68410535 | 0.49390864 | NA         |
| Cd5l        | 0.31397859 | 0.11468681 | 0.16764496 | 0.68410535 | 0.49390864 | NA         |
| Gpr17       | 0.31397859 | 0.11468681 | 0.16764496 | 0.68410535 | 0.49390864 | NA         |
| A530013C23I | 0.31397859 | 0.11468681 | 0.16764496 | 0.68410535 | 0.49390864 | NA         |
| Shbg        | 0.31397859 | 0.11468681 | 0.16764496 | 0.68410535 | 0.49390864 | NA         |
| Obox1       | 0.31397859 | 0.11468681 | 0.16764496 | 0.68410535 | 0.49390864 | NA         |
| 2310002D06I | 0.31397859 | 0.11468681 | 0.16764496 | 0.68410535 | 0.49390864 | NA         |
| 4930519G04I | 0.31397859 | 0.11468681 | 0.16764496 | 0.68410535 | 0.49390864 | NA         |
| Olfr1058    | 0.31397859 | 0.11468681 | 0.16764496 | 0.68410535 | 0.49390864 | NA         |
| Cd72        | 0.31397859 | 0.11468681 | 0.16764496 | 0.68410535 | 0.49390864 | NA         |
| Gm5087      | 0.31397859 | 0.11468681 | 0.16764496 | 0.68410535 | 0.49390864 | NA         |
| Defb19      | 0.31397859 | 0.11468681 | 0.16764496 | 0.68410535 | 0.49390864 | NA         |
| Prg2        | 0.31397859 | 0.11468681 | 0.16764496 | 0.68410535 | 0.49390864 | NA         |
| Nt5c1b      | 0.31397859 | 0.11468681 | 0.16764496 | 0.68410535 | 0.49390864 | NA         |
| Krtap4-16   | 0.31397859 | 0.11468681 | 0.16764496 | 0.68410535 | 0.49390864 | NA         |
| Lpcat2b     | 0.31397859 | 0.11468681 | 0.16764496 | 0.68410535 | 0.49390864 | NA         |
| Armc3       | 0.31397859 | 0.11468681 | 0.16764496 | 0.68410535 | 0.49390864 | NA         |

|             |            |            |            |            |            |            |
|-------------|------------|------------|------------|------------|------------|------------|
| Alb         | 0.31397859 | 0.11468681 | 0.16764496 | 0.68410535 | 0.49390864 | NA         |
| Gm16336     | 0.31397859 | 0.11468681 | 0.16764496 | 0.68410535 | 0.49390864 | NA         |
| Rmst        | 0.31397859 | 0.11468681 | 0.16764496 | 0.68410535 | 0.49390864 | NA         |
| Mir6903     | 0.31397859 | 0.11468681 | 0.16764496 | 0.68410535 | 0.49390864 | NA         |
| Mir1936     | 0.31397859 | 0.11468681 | 0.16764496 | 0.68410535 | 0.49390864 | NA         |
| Slc46a2     | 0.31397859 | 0.11468681 | 0.16764496 | 0.68410535 | 0.49390864 | NA         |
| Gm11780     | 0.31397859 | 0.11468681 | 0.16764496 | 0.68410535 | 0.49390864 | NA         |
| Map3k11     | 1376.46248 | 0.11467685 | 0.22794511 | 0.50308976 | 0.61490116 | 0.82951097 |
| Ube2n       | 4009.15384 | 0.11452903 | 0.16284704 | 0.7032921  | 0.48187373 | 0.74500838 |
| Tacc1       | 5497.14111 | 0.11449914 | 0.22869892 | 0.50065449 | 0.6166143  | 0.83032065 |
| Myo1d       | 233.12637  | 0.11445224 | 0.32314166 | 0.35418595 | 0.72319953 | 0.88771615 |
| Sox9        | 4.37111886 | 0.11444672 | 0.40133012 | 0.28516853 | 0.77551503 | NA         |
| Usp14       | 15459.3623 | 0.11434117 | 0.20153159 | 0.56736105 | 0.57046891 | 0.80487644 |
| Vav1        | 21.6534907 | 0.1143311  | 0.41342804 | 0.27654414 | 0.78213016 | 0.91378174 |
| Cdc25a      | 8956.23398 | 0.11429856 | 0.17139941 | 0.66685508 | 0.50486471 | 0.76069674 |
| Mir7042     | 0.3085845  | 0.1142766  | 0.16738486 | 0.68271766 | 0.49478527 | NA         |
| Lrrtm2      | 0.3085845  | 0.1142766  | 0.16738486 | 0.68271766 | 0.49478527 | NA         |
| Vmn1r227    | 0.3085845  | 0.1142766  | 0.16738486 | 0.68271766 | 0.49478527 | NA         |
| 4930449E01F | 0.3085845  | 0.1142766  | 0.16738486 | 0.68271766 | 0.49478527 | NA         |
| Olfr329-ps  | 0.3085845  | 0.1142766  | 0.16738486 | 0.68271766 | 0.49478527 | NA         |
| Vgll2       | 0.3085845  | 0.1142766  | 0.16738486 | 0.68271766 | 0.49478527 | NA         |
| C230079O03  | 0.3085845  | 0.1142766  | 0.16738486 | 0.68271766 | 0.49478527 | NA         |
| Poteg       | 0.3085845  | 0.1142766  | 0.16738486 | 0.68271766 | 0.49478527 | NA         |
| Vmn1r29     | 0.3085845  | 0.1142766  | 0.16738486 | 0.68271766 | 0.49478527 | NA         |
| 1700007J10R | 0.3085845  | 0.1142766  | 0.16738486 | 0.68271766 | 0.49478527 | NA         |
| Gm16894     | 0.3085845  | 0.1142766  | 0.16738486 | 0.68271766 | 0.49478527 | NA         |
| Lhfpl1      | 0.3085845  | 0.1142766  | 0.16738486 | 0.68271766 | 0.49478527 | NA         |
| Eppin       | 0.3085845  | 0.1142766  | 0.16738486 | 0.68271766 | 0.49478527 | NA         |
| Mir6937     | 0.3085845  | 0.1142766  | 0.16738486 | 0.68271766 | 0.49478527 | NA         |
| 4933432I09R | 0.3085845  | 0.1142766  | 0.16738486 | 0.68271766 | 0.49478527 | NA         |
| Olfr330     | 0.3085845  | 0.1142766  | 0.16738486 | 0.68271766 | 0.49478527 | NA         |
| 1700030O20  | 0.3085845  | 0.1142766  | 0.16738486 | 0.68271766 | 0.49478527 | NA         |
| Gm16390     | 0.3085845  | 0.1142766  | 0.16738486 | 0.68271766 | 0.49478527 | NA         |
| Marco       | 0.3085845  | 0.1142766  | 0.16738486 | 0.68271766 | 0.49478527 | NA         |
| Dspp        | 0.3085845  | 0.1142766  | 0.16738486 | 0.68271766 | 0.49478527 | NA         |
| Pgk2        | 0.3085845  | 0.1142766  | 0.16738486 | 0.68271766 | 0.49478527 | NA         |
| Klra2       | 0.3085845  | 0.1142766  | 0.16738486 | 0.68271766 | 0.49478527 | NA         |
| Mir324      | 0.3085845  | 0.1142766  | 0.16738486 | 0.68271766 | 0.49478527 | NA         |
| Gm2030      | 0.3085845  | 0.1142766  | 0.16738486 | 0.68271766 | 0.49478527 | NA         |
| Mcoln2      | 0.3085845  | 0.1142766  | 0.16738486 | 0.68271766 | 0.49478527 | NA         |
| Cd84        | 0.3085845  | 0.1142766  | 0.16738486 | 0.68271766 | 0.49478527 | NA         |



|             |            |            |            |            |            |            |
|-------------|------------|------------|------------|------------|------------|------------|
| Adamts18    | 0.3085845  | 0.1142766  | 0.16738486 | 0.68271766 | 0.49478527 | NA         |
| Col24a1     | 1.46314116 | 0.11425833 | 0.22858832 | 0.49984326 | 0.61718545 | NA         |
| Ntsr1       | 4.94804585 | 0.11422979 | 0.40416892 | 0.28262884 | 0.77746137 | NA         |
| C130050O18  | 0.82581554 | 0.11416698 | 0.22562283 | 0.5060081  | 0.61285096 | NA         |
| Rab10       | 7986.55484 | 0.11414978 | 0.16971409 | 0.67260045 | 0.50120151 | 0.75821324 |
| Ogg1        | 1165.92145 | 0.11414413 | 0.1731095  | 0.65937528 | 0.50965481 | 0.76413825 |
| Rgs7bp      | 3.38694474 | 0.11413721 | 0.3392249  | 0.33646472 | 0.73652045 | NA         |
| Cldn12      | 2742.50352 | 0.11412702 | 0.17423794 | 0.65500674 | 0.51246342 | 0.76532398 |
| Pip5k1b     | 1567.47525 | 0.11412666 | 0.16461813 | 0.69328126 | 0.48813306 | 0.74925614 |
| Bckdha      | 3715.79215 | 0.11395328 | 0.21125508 | 0.53941083 | 0.58960341 | 0.8149429  |
| Ppp1r14c    | 20.2766108 | 0.11394307 | 0.42965794 | 0.26519484 | 0.79085937 | 0.91829081 |
| B430212C06f | 8.43750976 | 0.11389792 | 0.42798237 | 0.26612759 | 0.79014095 | 0.91812832 |
| Car3        | 4.39200684 | 0.11378948 | 0.37450436 | 0.30384021 | 0.76124963 | NA         |
| lqcd        | 10.6835164 | 0.11378523 | 0.42972946 | 0.2647834  | 0.79117633 | 0.91829081 |
| Olf95       | 0.30142876 | 0.11375894 | 0.16705562 | 0.68096442 | 0.495894   | NA         |
| Olf372      | 0.30142876 | 0.11375894 | 0.16705562 | 0.68096442 | 0.495894   | NA         |
| C2cd4d      | 0.30142876 | 0.11375894 | 0.16705562 | 0.68096442 | 0.495894   | NA         |
| Tppp2       | 0.30142876 | 0.11375894 | 0.16705562 | 0.68096442 | 0.495894   | NA         |
| Il10ra      | 0.30142876 | 0.11375894 | 0.16705562 | 0.68096442 | 0.495894   | NA         |
| Ppp3r2      | 0.30142876 | 0.11375894 | 0.16705562 | 0.68096442 | 0.495894   | NA         |
| Nphs2       | 0.30142876 | 0.11375894 | 0.16705562 | 0.68096442 | 0.495894   | NA         |
| Mir1940     | 0.30142876 | 0.11375894 | 0.16705562 | 0.68096442 | 0.495894   | NA         |
| Foxe3       | 0.30142876 | 0.11375894 | 0.16705562 | 0.68096442 | 0.495894   | NA         |
| Ldlrad1     | 0.30142876 | 0.11375894 | 0.16705562 | 0.68096442 | 0.495894   | NA         |
| Ppp1r1c     | 0.30142876 | 0.11375894 | 0.16705562 | 0.68096442 | 0.495894   | NA         |
| Gpr141      | 0.30142876 | 0.11375894 | 0.16705562 | 0.68096442 | 0.495894   | NA         |
| Cxcr6       | 0.30142876 | 0.11375894 | 0.16705562 | 0.68096442 | 0.495894   | NA         |
| Trp53tg5    | 0.30142876 | 0.11375894 | 0.16705562 | 0.68096442 | 0.495894   | NA         |
| 4930452G13l | 0.30142876 | 0.11375894 | 0.16705562 | 0.68096442 | 0.495894   | NA         |
| Gm16982     | 0.30142876 | 0.11375894 | 0.16705562 | 0.68096442 | 0.495894   | NA         |
| Mapre1      | 12473.6165 | 0.1134226  | 0.1929872  | 0.58772081 | 0.5567197  | 0.79571116 |
| Cdh17       | 9.15569109 | 0.11340963 | 0.39515638 | 0.28699936 | 0.77411281 | 0.90992938 |
| Gbp5        | 0.99033796 | 0.11340658 | 0.2056828  | 0.5513664  | 0.58138253 | NA         |
| Adgb        | 0.99033796 | 0.11340658 | 0.2056828  | 0.5513664  | 0.58138253 | NA         |
| Dtx3        | 2078.69734 | 0.11339107 | 0.25188805 | 0.45016454 | 0.6525918  | 0.85045295 |
| Gm16701     | 2.62990553 | 0.11338216 | 0.35293433 | 0.32125568 | 0.74801664 | NA         |
| Fam102b     | 139.583372 | 0.11336475 | 0.34320346 | 0.33031355 | 0.74116305 | 0.89614524 |
| Helz        | 7371.56137 | 0.11330753 | 0.29847902 | 0.3796164  | 0.70423018 | 0.87942876 |
| Cops8       | 5670.93623 | 0.11327856 | 0.1875504  | 0.60398994 | 0.54585033 | 0.78706709 |
| Ptchd4      | 1.49539656 | 0.1132781  | 0.22573074 | 0.50182843 | 0.61578821 | NA         |
| Stard13     | 23.8289076 | 0.11319567 | 0.42364223 | 0.26719638 | 0.78931796 | 0.91766475 |

|             |            |            |            |            |            |            |
|-------------|------------|------------|------------|------------|------------|------------|
| Allc        | 1.80439372 | 0.1131332  | 0.31975669 | 0.35381025 | 0.72348109 | NA         |
| Tmem169     | 4.60212169 | 0.11310639 | 0.3919311  | 0.28858743 | 0.77289711 | NA         |
| Ppp1r3g     | 29.9125198 | 0.11293545 | 0.42923376 | 0.26310942 | 0.79246624 | 0.918989   |
| Gorasp1     | 1169.65602 | 0.11292541 | 0.18126039 | 0.62300104 | 0.53328384 | 0.77920671 |
| Apaf1       | 5197.5635  | 0.11290439 | 0.22830974 | 0.49452286 | 0.62093697 | 0.83171324 |
| St18        | 0.8186598  | 0.11290277 | 0.2251563  | 0.50144175 | 0.61606027 | NA         |
| Vhl         | 3675.95947 | 0.11282038 | 0.17605543 | 0.64082307 | 0.52163764 | 0.7704423  |
| Dydc1       | 0.28887893 | 0.11280103 | 0.16644339 | 0.67771407 | 0.497953   | NA         |
| Mir1966     | 0.28887893 | 0.11280103 | 0.16644339 | 0.67771407 | 0.497953   | NA         |
| A930041C12I | 0.28887893 | 0.11280103 | 0.16644339 | 0.67771407 | 0.497953   | NA         |
| Gm7538      | 0.28887893 | 0.11280103 | 0.16644339 | 0.67771407 | 0.497953   | NA         |
| Csf2        | 0.28887893 | 0.11280103 | 0.16644339 | 0.67771407 | 0.497953   | NA         |
| Gm5483      | 0.28887893 | 0.11280103 | 0.16644339 | 0.67771407 | 0.497953   | NA         |
| Olfrc631    | 0.28887893 | 0.11280103 | 0.16644339 | 0.67771407 | 0.497953   | NA         |
| Tenm2       | 0.28887893 | 0.11280103 | 0.16644339 | 0.67771407 | 0.497953   | NA         |
| Mir3473e    | 0.28887893 | 0.11280103 | 0.16644339 | 0.67771407 | 0.497953   | NA         |
| Spata32     | 0.28887893 | 0.11280103 | 0.16644339 | 0.67771407 | 0.497953   | NA         |
| A4gnt       | 0.28887893 | 0.11280103 | 0.16644339 | 0.67771407 | 0.497953   | NA         |
| Actl7a      | 0.28887893 | 0.11280103 | 0.16644339 | 0.67771407 | 0.497953   | NA         |
| Lce3a       | 0.28887893 | 0.11280103 | 0.16644339 | 0.67771407 | 0.497953   | NA         |
| Gdnf        | 0.28887893 | 0.11280103 | 0.16644339 | 0.67771407 | 0.497953   | NA         |
| Rhox3f      | 0.28887893 | 0.11280103 | 0.16644339 | 0.67771407 | 0.497953   | NA         |
| Ccl4        | 0.28887893 | 0.11280103 | 0.16644339 | 0.67771407 | 0.497953   | NA         |
| Gm9961      | 0.28887893 | 0.11280103 | 0.16644339 | 0.67771407 | 0.497953   | NA         |
| Ly86        | 0.28887893 | 0.11280103 | 0.16644339 | 0.67771407 | 0.497953   | NA         |
| Mir6909     | 0.28887893 | 0.11280103 | 0.16644339 | 0.67771407 | 0.497953   | NA         |
| Mir665      | 0.28887893 | 0.11280103 | 0.16644339 | 0.67771407 | 0.497953   | NA         |
| Gla4        | 0.28887893 | 0.11280103 | 0.16644339 | 0.67771407 | 0.497953   | NA         |
| Defb48      | 0.28887893 | 0.11280103 | 0.16644339 | 0.67771407 | 0.497953   | NA         |
| Cactin      | 3166.84661 | 0.11273899 | 0.2321184  | 0.48569604 | 0.62718269 | 0.83498616 |
| Nbeal2      | 842.867411 | 0.11271463 | 0.24836324 | 0.45382974 | 0.64995138 | 0.84900546 |
| Acad9       | 4302.85972 | 0.11268834 | 0.19492779 | 0.57810298 | 0.56319459 | 0.79991224 |
| Enpp2       | 2.53477347 | 0.1126803  | 0.35130914 | 0.320744   | 0.7484044  | NA         |
| Fubp3       | 14093.9806 | 0.11259099 | 0.18214092 | 0.61815318 | 0.53647437 | 0.78079716 |
| Safb        | 9387.2326  | 0.11249279 | 0.21079142 | 0.53366874 | 0.59357074 | 0.81730286 |
| Ghrl        | 1.30225117 | 0.11237409 | 0.24661829 | 0.45566    | 0.64863449 | NA         |
| Tango2      | 1018.41927 | 0.11234674 | 0.19958499 | 0.56290174 | 0.5735018  | 0.80644198 |
| Psm14       | 12238.7024 | 0.11234165 | 0.14172644 | 0.79266545 | 0.42797276 | 0.70472095 |
| Ilk         | 3271.10132 | 0.11228828 | 0.17338709 | 0.64761612 | 0.51723327 | 0.76794869 |
| 2410004P03F | 75.2474855 | 0.11227799 | 0.37305398 | 0.30096983 | 0.7634375  | 0.90530857 |
| Traf3ip2    | 1717.80375 | 0.11226279 | 0.16831625 | 0.66697534 | 0.50478789 | 0.76065469 |

|            |            |            |            |            |            |            |
|------------|------------|------------|------------|------------|------------|------------|
| Impa2      | 7040.3669  | 0.11218871 | 0.18032169 | 0.62215869 | 0.53383753 | 0.77957624 |
| Cpz        | 73.365782  | 0.11214608 | 0.33427021 | 0.33549529 | 0.7372515  | 0.89402667 |
| Tmem245    | 1963.32387 | 0.1121081  | 0.26736028 | 0.41931474 | 0.67498613 | 0.86408562 |
| Pcdhga1    | 190.173441 | 0.11205458 | 0.30886934 | 0.36278957 | 0.71676208 | 0.88475711 |
| Tmem102    | 1040.38679 | 0.11182349 | 0.21299987 | 0.52499325 | 0.59958789 | 0.82028602 |
| Hyal6      | 0.97778813 | 0.11182344 | 0.20499325 | 0.54549818 | 0.58541093 | NA         |
| Ppm1f      | 5271.54113 | 0.11178577 | 0.19892439 | 0.56195107 | 0.57414936 | 0.80656634 |
| Diap3      | 4072.40444 | 0.11173062 | 0.21556066 | 0.51832565 | 0.60423108 | 0.82301809 |
| Wbscr22    | 4118.19699 | 0.11168665 | 0.18670365 | 0.59820279 | 0.54970463 | 0.79013372 |
| AF357426   | 10.7381841 | 0.11161378 | 0.4285161  | 0.26046578 | 0.79450451 | 0.91975523 |
| lqcg       | 1966.5011  | 0.1116133  | 0.1967341  | 0.5673307  | 0.57048952 | 0.80487644 |
| Tbpl1      | 2260.5172  | 0.11148225 | 0.15242638 | 0.7313842  | 0.46454451 | 0.73397175 |
| Rnf11      | 2907.8432  | 0.11141918 | 0.22279215 | 0.50010371 | 0.61700205 | 0.83032065 |
| Gm9047     | 1.0025104  | 0.11138379 | 0.20860439 | 0.5339475  | 0.59337786 | NA         |
| Frmd3      | 2.59867024 | 0.11133806 | 0.32940976 | 0.33799261 | 0.73536876 | NA         |
| Sel1l      | 4634.87228 | 0.11130649 | 0.19690893 | 0.56526887 | 0.5718909  | 0.80538015 |
| Fez1       | 873.925639 | 0.11116809 | 0.36458898 | 0.30491347 | 0.76043206 | 0.90431969 |
| Sdc1       | 2759.65084 | 0.11115758 | 0.19638755 | 0.56601135 | 0.57138607 | 0.80538015 |
| Midn       | 5850.78652 | 0.11113921 | 0.22035104 | 0.50437342 | 0.61399899 | 0.8287946  |
| Cyb5rl     | 136.464071 | 0.11113332 | 0.26609667 | 0.41764267 | 0.67620839 | 0.864488   |
| Dapk2      | 89.8943161 | 0.11111739 | 0.37412371 | 0.29700707 | 0.76646111 | 0.90621355 |
| Epc1       | 2606.94656 | 0.11105861 | 0.21680878 | 0.51224221 | 0.6084815  | 0.82562526 |
| Daam1      | 2839.42197 | 0.11077724 | 0.21476456 | 0.51580783 | 0.60598863 | 0.82418428 |
| BC051628   | 3.19313507 | 0.11076934 | 0.3734026  | 0.29664855 | 0.76673484 | NA         |
| Sec23b     | 9215.45385 | 0.1106865  | 0.15287248 | 0.72404462 | 0.46903834 | 0.73676921 |
| N4bp2      | 4270.56729 | 0.11064671 | 0.30707566 | 0.36032394 | 0.7186049  | 0.88550762 |
| Al197445   | 0.80610997 | 0.11063893 | 0.22432347 | 0.49321157 | 0.6218631  | NA         |
| F2rl3      | 2.87946021 | 0.11052733 | 0.3424037  | 0.3227983  | 0.746848   | NA         |
| Elac2      | 3580.93353 | 0.1104232  | 0.20572141 | 0.53676084 | 0.59143282 | 0.81623818 |
| Inpp5k     | 2423.28911 | 0.11038604 | 0.22181461 | 0.49764997 | 0.61873078 | 0.83090659 |
| Nqo2       | 2776.351   | 0.11038486 | 0.19638226 | 0.56209181 | 0.57405346 | 0.80656634 |
| Zmynd8     | 9767.53238 | 0.11035054 | 0.15888204 | 0.69454385 | 0.48734121 | 0.74880379 |
| 6-Mar      | 4490.69441 | 0.11028556 | 0.23569194 | 0.4679225  | 0.63984002 | 0.84244789 |
| Comtd1     | 941.409087 | 0.11021567 | 0.20034672 | 0.55012465 | 0.58223388 | 0.81000763 |
| Mnt        | 3150.44956 | 0.11019379 | 0.20405249 | 0.54002671 | 0.58917861 | 0.81457242 |
| Gla        | 2033.43719 | 0.11009132 | 0.2238706  | 0.49176319 | 0.62288676 | 0.83253766 |
| Speer5-ps1 | 13.5981994 | 0.11007593 | 0.42329279 | 0.26004678 | 0.79482769 | 0.91980692 |
| Ubxn11     | 866.163118 | 0.10998155 | 0.24134993 | 0.45569331 | 0.64861054 | 0.84862854 |
| Brsk1      | 1056.4126  | 0.10987014 | 0.20642193 | 0.53226    | 0.59454593 | 0.81784068 |
| Rgl3       | 6.98977087 | 0.10986253 | 0.39307741 | 0.27949337 | 0.77986622 | 0.91295541 |
| Spaca1     | 0.93837699 | 0.10978908 | 0.20538024 | 0.53456494 | 0.59295073 | NA         |

|             |            |            |            |            |            |            |
|-------------|------------|------------|------------|------------|------------|------------|
| Ccm2        | 1634.13106 | 0.10971401 | 0.20631613 | 0.53177622 | 0.59488099 | 0.81794822 |
| Tigd5       | 80.6838604 | 0.10970982 | 0.32134539 | 0.34140778 | 0.73279662 | 0.89216077 |
| Sptlc2      | 8202.12235 | 0.10967192 | 0.15493589 | 0.70785358 | 0.47903619 | 0.7432908  |
| Ints5       | 4151.31236 | 0.10966861 | 0.22737324 | 0.48232857 | 0.62957256 | 0.83647285 |
| Ppm1m       | 1875.66545 | 0.10944443 | 0.21891372 | 0.49994323 | 0.61711505 | 0.83032065 |
| Vax1        | 0.89659017 | 0.10930627 | 0.20078235 | 0.54440179 | 0.58616501 | NA         |
| Narfl       | 1431.97048 | 0.10919327 | 0.2088399  | 0.52285634 | 0.60107423 | 0.82152446 |
| Spink3      | 1.00966614 | 0.10913859 | 0.2062729  | 0.52909805 | 0.59673744 | NA         |
| Pcdhb17     | 1.32578377 | 0.10911771 | 0.18935919 | 0.57624724 | 0.56444808 | NA         |
| Gins3       | 1682.2579  | 0.10909914 | 0.1909807  | 0.5712574  | 0.56782517 | 0.80306738 |
| Gm20199     | 3.29779856 | 0.10897935 | 0.37903342 | 0.2875191  | 0.77371488 | NA         |
| Ppargc1a    | 2.39917774 | 0.10892244 | 0.29197907 | 0.37304879 | 0.70911213 | NA         |
| Siah2       | 1176.37777 | 0.10851845 | 0.37516071 | 0.28925857 | 0.77238351 | 0.90953627 |
| Cdv3        | 17073.8194 | 0.10842458 | 0.18621487 | 0.5822552  | 0.5603948  | 0.79834183 |
| Skor1       | 1.46623323 | 0.10839447 | 0.28475319 | 0.38066113 | 0.70345471 | NA         |
| Gm4871      | 0.88943442 | 0.10835305 | 0.20033503 | 0.54085922 | 0.58860462 | NA         |
| Gm14137     | 0.88943442 | 0.10835305 | 0.20033503 | 0.54085922 | 0.58860462 | NA         |
| Hspa8       | 147010.21  | 0.10826408 | 0.27533382 | 0.39321024 | 0.69416421 | 0.87496374 |
| St5         | 4513.07866 | 0.10824332 | 0.19135742 | 0.56566044 | 0.57162463 | 0.80538015 |
| Cxxc4       | 0.97741075 | 0.1081053  | 0.2072056  | 0.5217296  | 0.60185861 | NA         |
| Asun        | 5629.48224 | 0.10799221 | 0.16172486 | 0.66775273 | 0.50429145 | 0.76042241 |
| Gcnt3       | 113.204743 | 0.10782817 | 0.38325193 | 0.28135064 | 0.77844147 | 0.91231768 |
| Tmem38a     | 1343.41211 | 0.10773936 | 0.23789887 | 0.4528788  | 0.65063602 | 0.84904399 |
| Doc2b       | 72.4543976 | 0.10772406 | 0.43214423 | 0.24927803 | 0.80314572 | 0.92352256 |
| Tsn         | 11039.4867 | 0.10771499 | 0.14778999 | 0.72883817 | 0.46610066 | 0.73498824 |
| Rasl12      | 4.78569726 | 0.10769886 | 0.40806716 | 0.26392435 | 0.79183821 | NA         |
| Gpatch2     | 1746.84766 | 0.10769172 | 0.2166732  | 0.49702372 | 0.61917233 | 0.83092413 |
| 1110028F18F | 8.79725021 | 0.10763221 | 0.40073474 | 0.26858716 | 0.78824739 | 0.91710573 |
| Stt3b       | 12061.534  | 0.10757416 | 0.15862801 | 0.67815364 | 0.49767428 | 0.75633679 |
| Pcdha12     | 0.99711632 | 0.10756506 | 0.20559932 | 0.52317812 | 0.60085031 | NA         |
| Vwa7        | 19.6212662 | 0.10754495 | 0.41922257 | 0.25653426 | 0.79753833 | 0.9212691  |
| Ccdc126     | 544.21847  | 0.10753947 | 0.22189809 | 0.48463452 | 0.62793562 | 0.83543543 |
| Rrp8        | 3451.78989 | 0.10752719 | 0.15628634 | 0.68801403 | 0.49144395 | 0.75186608 |
| Dcaf8       | 7569.23084 | 0.10745962 | 0.15027237 | 0.71509901 | 0.47454787 | 0.74052205 |
| Dhx57       | 2645.67361 | 0.10728514 | 0.16020246 | 0.66968473 | 0.50305879 | 0.75940849 |
| Tspear      | 34.0211711 | 0.10721012 | 0.39868566 | 0.26890889 | 0.7879998  | 0.91705183 |
| Lhfp13      | 1.10323841 | 0.10719296 | 0.24207024 | 0.44281758 | 0.65789768 | NA         |
| Crhr2       | 198.122061 | 0.1070811  | 0.29649462 | 0.36115697 | 0.71798211 | 0.88550557 |
| Cdx4        | 10.7003215 | 0.10697321 | 0.37029765 | 0.28888437 | 0.77266986 | 0.90962818 |
| Cnr1        | 11.4172922 | 0.1069316  | 0.42107267 | 0.25395046 | 0.79953383 | 0.92216499 |
| Arl4c       | 346.794238 | 0.10686863 | 0.31845993 | 0.33557951 | 0.73718798 | 0.89401936 |

|             |            |            |            |            |            |            |
|-------------|------------|------------|------------|------------|------------|------------|
| Pde6h       | 1.73612297 | 0.10678618 | 0.30485309 | 0.35028735 | 0.72612306 | NA         |
| Psmf1       | 2270.48159 | 0.10672622 | 0.169241   | 0.63061682 | 0.5282911  | 0.77552483 |
| Itgam       | 47.099477  | 0.10672128 | 0.41255741 | 0.25868225 | 0.79588042 | 0.92054566 |
| Cdk2ap1     | 804.182713 | 0.10670375 | 0.21638645 | 0.49311659 | 0.62193021 | 0.83196874 |
| C030034I22R | 76.225629  | 0.10667756 | 0.40121586 | 0.2658857  | 0.79032724 | 0.91812832 |
| Kif9        | 92.2356125 | 0.10663033 | 0.36813425 | 0.28965067 | 0.7720835  | 0.90945845 |
| Supt6       | 12433.8875 | 0.10652008 | 0.27428307 | 0.38835821 | 0.69775096 | 0.87647215 |
| Taf11       | 2439.68434 | 0.10640625 | 0.16844517 | 0.63169662 | 0.52758514 | 0.77506906 |
| Olf376      | 3.57893641 | 0.1063699  | 0.30149724 | 0.35280557 | 0.72423421 | NA         |
| Zfp335      | 2129.40319 | 0.10633517 | 0.22698543 | 0.46846694 | 0.63945071 | 0.84236323 |
| Tlr1        | 3.1441027  | 0.10625403 | 0.3336632  | 0.31844696 | 0.75014592 | NA         |
| Sfta2       | 5.80481229 | 0.1061606  | 0.39417873 | 0.26932097 | 0.78768269 | NA         |
| Pramel5     | 5.30693202 | 0.10605869 | 0.38196544 | 0.27766567 | 0.78126902 | NA         |
| Spdya       | 16.6898873 | 0.10602117 | 0.4321226  | 0.24534974 | 0.80618564 | 0.92517105 |
| AK010878    | 548.319562 | 0.10598512 | 0.26271571 | 0.40342131 | 0.68663831 | 0.87055301 |
| Fytd1       | 12629.5474 | 0.10592724 | 0.17511121 | 0.6049141  | 0.54523607 | 0.78661205 |
| Phf11c      | 122.914648 | 0.105878   | 0.27502642 | 0.38497393 | 0.70025673 | 0.87785127 |
| Ifi204      | 1.83084237 | 0.10582156 | 0.20335193 | 0.5203863  | 0.60279436 | NA         |
| Thumpd1     | 8327.24425 | 0.10582016 | 0.15255431 | 0.69365562 | 0.4878982  | 0.74917686 |
| Plvap       | 88.8347199 | 0.10579848 | 0.32678479 | 0.32375582 | 0.74612291 | 0.89917524 |
| Cdk2        | 13196.0076 | 0.10575663 | 0.15821478 | 0.66843715 | 0.50385459 | 0.76005847 |
| Fam71d      | 1.75582854 | 0.10562786 | 0.29975799 | 0.35237714 | 0.72455545 | NA         |
| Olf143      | 1.0763771  | 0.10548273 | 0.24358369 | 0.43304514 | 0.66498198 | NA         |
| A730020E08F | 3.28048481 | 0.10543458 | 0.33810744 | 0.31183752 | 0.75516401 | NA         |
| Zfp169      | 324.659263 | 0.10530129 | 0.25273046 | 0.41665451 | 0.67693113 | 0.86492121 |
| Klhl9       | 3455.08321 | 0.10528908 | 0.33569604 | 0.31364408 | 0.75379138 | 0.90191816 |
| Ggt1        | 1615.50894 | 0.10513813 | 0.36974859 | 0.28435032 | 0.77614193 | 0.91080372 |
| Tmem106c    | 692.538984 | 0.10508236 | 0.27725193 | 0.37901399 | 0.70467748 | 0.87942876 |
| Kdsr        | 2682.71049 | 0.10505303 | 0.16973142 | 0.61893683 | 0.53595798 | 0.78060232 |
| Icmt        | 3050.48027 | 0.10498669 | 0.1831198  | 0.57332245 | 0.56642639 | 0.80234403 |
| Pcyox1      | 4298.1504  | 0.10496215 | 0.19197347 | 0.54675341 | 0.58454816 | 0.81156222 |
| Bhlha9      | 6.98838592 | 0.10485884 | 0.42055336 | 0.2493354  | 0.80310135 | 0.92352256 |
| C330024C12F | 11.2903543 | 0.10483391 | 0.43086051 | 0.24331288 | 0.80776303 | 0.92616109 |
| Mapre3      | 248.375624 | 0.10482974 | 0.27498718 | 0.38121683 | 0.70304236 | 0.8791919  |
| Mocs3       | 795.325667 | 0.10479078 | 0.22498085 | 0.46577644 | 0.64137553 | 0.84346082 |
| Btg1        | 2909.81251 | 0.10473887 | 0.26540421 | 0.39463905 | 0.69310929 | 0.87461511 |
| Serpina3m   | 896.792758 | 0.10452656 | 0.39397613 | 0.26531191 | 0.79076919 | 0.91829081 |
| Clpsl2      | 1.41966634 | 0.10451596 | 0.28843172 | 0.36235945 | 0.71708343 | NA         |
| Atg4b       | 4710.17965 | 0.10439489 | 0.19467148 | 0.53626184 | 0.5917776  | 0.81635177 |
| Pik3r1      | 1731.79039 | 0.10436145 | 0.22562896 | 0.4625357  | 0.64369721 | 0.84502239 |
| Acsbg1      | 15.9079929 | 0.10433969 | 0.42866859 | 0.2434041  | 0.80769237 | 0.92614835 |

|             |            |            |            |            |            |            |
|-------------|------------|------------|------------|------------|------------|------------|
| Hdlbp       | 31382.2691 | 0.10433106 | 0.18596692 | 0.56101944 | 0.57478429 | 0.80673793 |
| Ace         | 466.078892 | 0.10418184 | 0.39019059 | 0.26700244 | 0.78946728 | 0.91776973 |
| Otud7a      | 25.6428873 | 0.10417532 | 0.41021858 | 0.25395077 | 0.79953359 | 0.92216499 |
| Nfatc2ip    | 24616.7213 | 0.1041281  | 0.18402988 | 0.56582169 | 0.571515   | 0.80538015 |
| Mustn1      | 5.10552098 | 0.10405961 | 0.41123873 | 0.25303943 | 0.80023774 | NA         |
| Atf6        | 3429.23877 | 0.10404931 | 0.16070918 | 0.64743851 | 0.51734818 | 0.76797266 |
| Lipt2       | 552.574621 | 0.10394594 | 0.24028006 | 0.43260328 | 0.66530301 | 0.85788782 |
| Smim1       | 190.996236 | 0.10387298 | 0.37429045 | 0.27751972 | 0.78138107 | 0.91337854 |
| 1700066B19F | 106.874927 | 0.10380573 | 0.42433103 | 0.24463383 | 0.80673996 | 0.92559319 |
| Ppt2        | 992.223302 | 0.10377887 | 0.22619673 | 0.45879915 | 0.64637841 | 0.84705994 |
| Zfp280b     | 5770.09708 | 0.10376808 | 0.24339058 | 0.42634387 | 0.66985729 | 0.86069163 |
| Srek1       | 5484.7672  | 0.10376457 | 0.1698262  | 0.61100449 | 0.54119661 | 0.7847247  |
| Tulp2       | 671.147023 | 0.10370606 | 0.21431191 | 0.48390243 | 0.62845511 | 0.83573631 |
| Nucb2       | 747.400325 | 0.10369532 | 0.22650627 | 0.45780331 | 0.64709376 | 0.84762087 |
| Tfcp2l1     | 76159.193  | 0.10368959 | 0.21684901 | 0.47816491 | 0.63253284 | 0.83829198 |
| Pgbd5       | 715.308351 | 0.10365521 | 0.19285977 | 0.53746414 | 0.59094705 | 0.81592982 |
| Tiparp      | 3245.08946 | 0.10352512 | 0.25330605 | 0.4086958  | 0.68276292 | 0.86812434 |
| Vps13c      | 3463.29286 | 0.10350248 | 0.26052985 | 0.39727683 | 0.69116333 | 0.87369566 |
| 6030458C11F | 6907.95047 | 0.10349583 | 0.16180349 | 0.63963905 | 0.52240729 | 0.77084692 |
| Ppp2r2b     | 1.7164174  | 0.10347159 | 0.30453408 | 0.33977014 | 0.73402964 | NA         |
| Cnpy2       | 5330.65902 | 0.10344622 | 0.2138082  | 0.48382717 | 0.62850853 | 0.83573631 |
| Uggt2       | 968.48432  | 0.1034295  | 0.41818465 | 0.24732974 | 0.80465305 | 0.92395773 |
| Rnf38       | 3914.95677 | 0.10337686 | 0.20204606 | 0.51164996 | 0.60889601 | 0.82562526 |
| Hoxb7       | 39.6020779 | 0.10333739 | 0.39249308 | 0.26328461 | 0.79233122 | 0.918989   |
| Apobr       | 277.460242 | 0.10331699 | 0.26396882 | 0.39139846 | 0.69550273 | 0.87541586 |
| Kcnj12      | 1535.87529 | 0.10329972 | 0.20595571 | 0.5015628  | 0.61597509 | 0.82999989 |
| Pfn1        | 31236.0782 | 0.10326922 | 0.21493638 | 0.48046412 | 0.63089741 | 0.83726622 |
| Gm7534      | 0.91151568 | 0.10325307 | 0.20115495 | 0.51330117 | 0.60774066 | NA         |
| Krt75       | 0.91151568 | 0.10325307 | 0.20115495 | 0.51330117 | 0.60774066 | NA         |
| Sp6         | 763.604841 | 0.10318967 | 0.21594613 | 0.47784912 | 0.63275759 | 0.83846625 |
| Il1r2       | 29.2315201 | 0.10317388 | 0.39852037 | 0.25889237 | 0.79571828 | 0.92042659 |
| 2410137M14  | 902.895243 | 0.10302888 | 0.16978323 | 0.60682599 | 0.5439664  | 0.78623679 |
| Rnf121      | 1347.64318 | 0.10301507 | 0.16060467 | 0.64142016 | 0.52124974 | 0.77003139 |
| Efhc2       | 1471.2914  | 0.10299335 | 0.26470376 | 0.38908911 | 0.69721023 | 0.87645821 |
| Dancr       | 1186.83376 | 0.10287258 | 0.20203693 | 0.50917714 | 0.61062806 | 0.82630326 |
| Krt19       | 190.35421  | 0.10283485 | 0.37604242 | 0.2734661  | 0.78449495 | 0.91499895 |
| Ehbp1l1     | 262.062558 | 0.10281002 | 0.22576023 | 0.45539474 | 0.64882528 | 0.84862854 |
| Zmym5       | 2440.52598 | 0.1027552  | 0.20125898 | 0.51056206 | 0.60965775 | 0.82596491 |
| 1500015O10I | 7.15178873 | 0.1024631  | 0.4201635  | 0.24386483 | 0.80733551 | 0.9258757  |
| Phf14       | 4074.78384 | 0.10244395 | 0.15921163 | 0.64344516 | 0.51993529 | 0.76982897 |
| Dnajc11     | 9481.25614 | 0.10241092 | 0.17594196 | 0.58207219 | 0.56051806 | 0.79840677 |

|             |            |            |            |            |            |            |
|-------------|------------|------------|------------|------------|------------|------------|
| 2310030G06I | 584.914355 | 0.10239958 | 0.21919214 | 0.46716811 | 0.6403796  | 0.84294424 |
| Gbp6        | 3.37368566 | 0.10238258 | 0.25876088 | 0.39566485 | 0.69235229 | NA         |
| Tnfsf13     | 32.9442515 | 0.1023803  | 0.39221052 | 0.26103405 | 0.79406625 | 0.91975523 |
| Fam207a     | 2193.28052 | 0.10234591 | 0.22239862 | 0.46019127 | 0.64537893 | 0.84629525 |
| Ube2e3      | 3298.72369 | 0.10232358 | 0.17158088 | 0.59635773 | 0.55093627 | 0.79097822 |
| 1700047E10F | 6.34499717 | 0.10211534 | 0.4177975  | 0.24441347 | 0.80691061 | 0.92559319 |
| lp6k1       | 6274.46508 | 0.10210284 | 0.16773523 | 0.60871433 | 0.54271381 | 0.78543607 |
| Ccdc32      | 803.891097 | 0.10204361 | 0.20923033 | 0.48770946 | 0.62575565 | 0.8342157  |
| B3gat1      | 1.49773385 | 0.10200489 | 0.28999169 | 0.35175108 | 0.72502495 | NA         |
| 9630028H03I | 1.16576353 | 0.10193515 | 0.18339808 | 0.55581362 | 0.57833827 | NA         |
| Sumf2       | 5170.78713 | 0.10185808 | 0.20376225 | 0.4998869  | 0.61715472 | 0.83032065 |
| Zfp513      | 1662.66653 | 0.1018497  | 0.19063991 | 0.53425172 | 0.59316739 | 0.81705522 |
| Ubp1        | 8532.09769 | 0.10178925 | 0.17039295 | 0.59737948 | 0.55025405 | 0.79070419 |
| Arhgef9     | 23.9267662 | 0.10175491 | 0.42550481 | 0.23913927 | 0.81099759 | 0.92781752 |
| Keap1       | 2745.29112 | 0.10172925 | 0.1974489  | 0.51521811 | 0.60640062 | 0.82429551 |
| Pcdh9       | 1.67619037 | 0.10172895 | 0.25989377 | 0.39142511 | 0.69548303 | NA         |
| Ube2j2      | 291.299483 | 0.10171772 | 0.24363305 | 0.4175038  | 0.67630995 | 0.864488   |
| Lsm2        | 4559.51325 | 0.10165003 | 0.16773008 | 0.60603342 | 0.54449256 | 0.78623679 |
| Sh3gl1      | 4600.32193 | 0.10164829 | 0.1951876  | 0.52077225 | 0.60252543 | 0.8223515  |
| Atp6v1c2    | 172.530321 | 0.10164739 | 0.27270736 | 0.37273433 | 0.70934618 | 0.8816794  |
| Loh12cr1    | 465.796617 | 0.10158128 | 0.20329124 | 0.4996835  | 0.61729795 | 0.83032065 |
| Vps26b      | 3125.83552 | 0.10153879 | 0.17520921 | 0.57952887 | 0.56223238 | 0.79934866 |
| Pex6        | 1448.37598 | 0.10151267 | 0.21163071 | 0.47966891 | 0.63146284 | 0.83751629 |
| Sec1        | 245.680847 | 0.10149321 | 0.3361608  | 0.30191864 | 0.76271409 | 0.90517207 |
| lqch        | 2.61910189 | 0.1014802  | 0.32561032 | 0.31166149 | 0.75529779 | NA         |
| Nkx2-3      | 3.91275534 | 0.10144769 | 0.35471611 | 0.28599684 | 0.77488054 | NA         |
| Apba1       | 6.14359617 | 0.10135381 | 0.40737246 | 0.24879887 | 0.80351637 | 0.92367556 |
| Srsf11      | 17289.425  | 0.10135257 | 0.15602552 | 0.64958968 | 0.5159573  | 0.76711938 |
| Psg17       | 1.77515672 | 0.10133189 | 0.29995798 | 0.33782027 | 0.73549863 | NA         |
| Gnpda1      | 8883.68617 | 0.10130744 | 0.17780391 | 0.5697706  | 0.5688333  | 0.8038345  |
| Dlx6os1     | 2.10589614 | 0.10129836 | 0.34084683 | 0.29719614 | 0.76631677 | NA         |
| Inadl       | 728.594421 | 0.10129208 | 0.3357027  | 0.30173151 | 0.76285674 | 0.90517207 |
| Trpc7       | 2.8556173  | 0.10124749 | 0.32553057 | 0.31102297 | 0.75578316 | NA         |
| Dzank1      | 124.291368 | 0.10112674 | 0.38454846 | 0.26297527 | 0.79256964 | 0.91904038 |
| Zfp622      | 4422.808   | 0.10105995 | 0.16350976 | 0.61806679 | 0.53653132 | 0.78079716 |
| Orc6        | 10084.4756 | 0.10089723 | 0.19556967 | 0.51591453 | 0.60591411 | 0.82418428 |
| Rassf7      | 2072.45768 | 0.10078906 | 0.22847369 | 0.44114075 | 0.6591111  | 0.85421847 |
| Coro2a      | 42.3575574 | 0.10068485 | 0.39000673 | 0.25816183 | 0.79628202 | 0.92066778 |
| Spopl       | 793.20054  | 0.10056191 | 0.22204236 | 0.45289517 | 0.65062423 | 0.84904399 |
| Mesdc2      | 10468.0543 | 0.10053248 | 0.17560173 | 0.57250277 | 0.56698141 | 0.80254878 |
| Edem1       | 4214.57716 | 0.10046566 | 0.19116929 | 0.52553243 | 0.59921311 | 0.8201599  |

|             |            |            |            |            |            |            |
|-------------|------------|------------|------------|------------|------------|------------|
| Glb1l3      | 1.13955748 | 0.10046395 | 0.18319716 | 0.54839252 | 0.58342241 | NA         |
| Drd5        | 10.0200331 | 0.10034821 | 0.3890919  | 0.25790362 | 0.79648129 | 0.92070321 |
| Nup50       | 8695.95486 | 0.10032737 | 0.19514311 | 0.51412201 | 0.60716669 | 0.82475941 |
| Zbtb8os     | 2287.59974 | 0.10029647 | 0.21913577 | 0.457691   | 0.64717445 | 0.84765518 |
| Fam46a      | 47.1429329 | 0.10020179 | 0.38531072 | 0.26005451 | 0.79482173 | 0.91980692 |
| Dydc2       | 2.28018663 | 0.10010179 | 0.31988621 | 0.31292937 | 0.75433432 | NA         |
| Pvrl1       | 1361.68218 | 0.10006586 | 0.19600819 | 0.51051875 | 0.60968808 | 0.82596491 |
| Rreb1       | 3588.18314 | 0.10006433 | 0.251594   | 0.39772143 | 0.69083554 | 0.87364263 |
| Rwdd2a      | 480.629829 | 0.09987877 | 0.2143868  | 0.46588116 | 0.64130057 | 0.84346082 |
| Mob3b       | 924.831002 | 0.09987162 | 0.27260537 | 0.36635971 | 0.71409668 | 0.88425449 |
| Ldb1        | 10763.6729 | 0.09976893 | 0.20819008 | 0.47922039 | 0.63178185 | 0.8377965  |
| 4930515G01l | 11.2086025 | 0.09975745 | 0.40757216 | 0.24476021 | 0.8066421  | 0.92559319 |
| Ptms        | 9168.10107 | 0.09970689 | 0.20132582 | 0.49525138 | 0.62042269 | 0.83152574 |
| Irf2bpl     | 5650.09504 | 0.09968926 | 0.27956319 | 0.35658938 | 0.72139923 | 0.88683632 |
| Snord73a    | 45.8359753 | 0.09968331 | 0.42283732 | 0.23574861 | 0.81362775 | 0.92878688 |
| Jmjd4       | 1727.80315 | 0.09967652 | 0.19272388 | 0.51719861 | 0.60501753 | 0.82372855 |
| Tmem101     | 1835.46694 | 0.0995926  | 0.21967022 | 0.45337326 | 0.65027999 | 0.84900546 |
| Vps33b      | 1522.03607 | 0.09957872 | 0.18253914 | 0.54551983 | 0.58539605 | 0.81209791 |
| Spop        | 3726.196   | 0.09955965 | 0.17868032 | 0.55719425 | 0.57739472 | 0.80734073 |
| Elk3        | 509.500304 | 0.09939184 | 0.32476461 | 0.30604272 | 0.75957212 | 0.90393112 |
| Il18bp      | 160.988066 | 0.09938382 | 0.27237189 | 0.3648828  | 0.7151989  | 0.88470138 |
| Psm7        | 15797.3216 | 0.09919477 | 0.20858377 | 0.47556323 | 0.63438557 | 0.83928202 |
| Aup1        | 3812.33171 | 0.09912469 | 0.1833858  | 0.54052545 | 0.58883472 | 0.8143171  |
| Pigx        | 2402.49764 | 0.09912282 | 0.24901384 | 0.3980615  | 0.69058486 | 0.87353873 |
| Chmp1a      | 5241.80317 | 0.09903591 | 0.22263494 | 0.44483543 | 0.65643869 | 0.85271673 |
| Ccar1       | 13077.037  | 0.09901064 | 0.19001853 | 0.52105783 | 0.60232649 | 0.82215213 |
| 2010012O05l | 367.878807 | 0.09897141 | 0.23500451 | 0.42114685 | 0.67364785 | 0.86321737 |
| Padi4       | 577.71078  | 0.09896322 | 0.24048849 | 0.41150918 | 0.68069921 | 0.86681269 |
| Hps4        | 1473.20988 | 0.09892522 | 0.19640858 | 0.50367057 | 0.6144929  | 0.82915219 |
| Cox5b       | 8951.15334 | 0.09890855 | 0.20891387 | 0.47344176 | 0.63589804 | 0.83996011 |
| Tmem136     | 1203.09032 | 0.09887929 | 0.22404534 | 0.44133605 | 0.65896973 | 0.8541834  |
| Gbx2        | 973.86963  | 0.09883524 | 0.39539245 | 0.24996745 | 0.80261252 | 0.92349559 |
| Itih1       | 1.22621065 | 0.09879067 | 0.21919127 | 0.45070531 | 0.65220195 | NA         |
| G6pc        | 1.22621065 | 0.09879067 | 0.21919127 | 0.45070531 | 0.65220195 | NA         |
| Pick1       | 2415.1666  | 0.0987903  | 0.18975941 | 0.52060817 | 0.60263976 | 0.82236318 |
| 2410088K16f | 228.986313 | 0.098703   | 0.38595169 | 0.25573926 | 0.79815218 | 0.92164102 |
| 4930506M07  | 387.88075  | 0.09868776 | 0.33042378 | 0.29867025 | 0.76519166 | 0.90610594 |
| Psme2b      | 42.7429264 | 0.09860214 | 0.39801042 | 0.24773759 | 0.80433745 | 0.92393645 |
| Ppp6r1      | 6138.22768 | 0.09858938 | 0.18389931 | 0.53610521 | 0.59188584 | 0.81637641 |
| Jmy         | 2220.91689 | 0.09852018 | 0.24661487 | 0.39949    | 0.68953219 | 0.87262736 |
| Brk1        | 7082.5006  | 0.09848062 | 0.1897648  | 0.51896148 | 0.6037876  | 0.82288924 |



|             |            |            |            |            |            |            |
|-------------|------------|------------|------------|------------|------------|------------|
| Ccdc101     | 1744.35712 | 0.09833613 | 0.17548667 | 0.56036239 | 0.57523228 | 0.80705857 |
| Plekhs1     | 39.0635513 | 0.09827187 | 0.4080868  | 0.24081119 | 0.80970146 | 0.92748171 |
| Map2k2      | 4955.46463 | 0.09825662 | 0.17238427 | 0.56998602 | 0.56868718 | 0.80374937 |
| Sys1        | 1333.75869 | 0.09819321 | 0.18792711 | 0.5225069  | 0.60131745 | 0.82154763 |
| Bex1        | 12272.8547 | 0.09812421 | 0.18030761 | 0.54420447 | 0.58630078 | 0.81262032 |
| Snord15a    | 11.2386651 | 0.09799432 | 0.43090381 | 0.22741575 | 0.82010047 | 0.930536   |
| Cox4i1      | 25580.3077 | 0.09779166 | 0.2166218  | 0.45143961 | 0.65167274 | 0.84981368 |
| 2310047M10  | 437.688838 | 0.09777417 | 0.27010836 | 0.36198126 | 0.71736603 | 0.88502651 |
| Sik3        | 2406.1603  | 0.09774516 | 0.22466957 | 0.43506185 | 0.66351753 | 0.85668869 |
| Gprasp1     | 6586.07741 | 0.09760671 | 0.21137165 | 0.46177768 | 0.64424076 | 0.84545047 |
| Cdh11       | 82.6089559 | 0.09753504 | 0.37777923 | 0.25817999 | 0.796268   | 0.92066778 |
| Hr          | 284.068142 | 0.09750946 | 0.33567847 | 0.29048469 | 0.77144546 | 0.90884457 |
| Lpar5       | 479.849694 | 0.09744746 | 0.26424195 | 0.3687812  | 0.71229082 | 0.88367248 |
| Serpina3h   | 147.156518 | 0.09720626 | 0.38168892 | 0.25467404 | 0.79897487 | 0.92171351 |
| Hpgd        | 235.947489 | 0.09719176 | 0.34593909 | 0.2809505  | 0.77874837 | 0.91247106 |
| Galk1       | 6149.45884 | 0.0971199  | 0.25328869 | 0.38343558 | 0.70139683 | 0.87816834 |
| Anks1       | 2515.77624 | 0.09697065 | 0.18857153 | 0.51423803 | 0.60708558 | 0.82473904 |
| Rdh14       | 413.678447 | 0.09694938 | 0.26052135 | 0.37213603 | 0.70979157 | 0.88183819 |
| ltpkc       | 1735.01738 | 0.09693983 | 0.17873257 | 0.54237358 | 0.58756117 | 0.81340776 |
| Dnajc24     | 850.834302 | 0.09685378 | 0.17720683 | 0.54655784 | 0.58468254 | 0.81167633 |
| Slc35a2     | 739.058824 | 0.09680731 | 0.21122697 | 0.45830943 | 0.64673015 | 0.84723143 |
| Asb3        | 1368.81781 | 0.09677108 | 0.18903171 | 0.5119304  | 0.60869972 | 0.82562526 |
| Fcrl1       | 5.02095592 | 0.09676915 | 0.40074187 | 0.24147503 | 0.80918697 | NA         |
| Capn15      | 850.465245 | 0.09675616 | 0.27388211 | 0.35327666 | 0.72388104 | 0.88829071 |
| Cdc42se2    | 8246.04622 | 0.09656801 | 0.1513501  | 0.63804393 | 0.52344508 | 0.77157293 |
| Gja4        | 191.99724  | 0.09655498 | 0.30750377 | 0.3139961  | 0.753524   | 0.90191816 |
| 2700070H01I | 10.7718449 | 0.09653187 | 0.42903739 | 0.22499641 | 0.82198207 | 0.93079758 |
| Eif5b       | 21406.6845 | 0.09642424 | 0.16378773 | 0.58871469 | 0.55605268 | 0.79522766 |
| Nova1       | 517.778014 | 0.0962701  | 0.22804828 | 0.42214787 | 0.67291709 | 0.86279388 |
| Mylk4       | 2.3049089  | 0.09626082 | 0.319045   | 0.3017155  | 0.76286895 | NA         |
| Mir3057     | 3.93068312 | 0.09620589 | 0.39377532 | 0.24431672 | 0.80698553 | NA         |
| Spink10     | 25.5325223 | 0.09616303 | 0.4299973  | 0.22363635 | 0.82304027 | 0.93107393 |
| Bex6        | 6.82796841 | 0.09615968 | 0.38794345 | 0.24787036 | 0.80423472 | 0.92388669 |
| Map2k3      | 3456.64242 | 0.09609771 | 0.19511073 | 0.49252908 | 0.62234537 | 0.83238091 |
| Atp5l       | 48.8845405 | 0.09609061 | 0.38390214 | 0.25029974 | 0.80235556 | 0.92349342 |
| 1500009L16F | 1006.38282 | 0.09601282 | 0.26769112 | 0.35867016 | 0.71984186 | 0.88597235 |
| Stx1b       | 35.8353579 | 0.09600689 | 0.40954445 | 0.23442362 | 0.81465613 | 0.92896417 |
| Laptm4b     | 4384.4996  | 0.09599073 | 0.32744677 | 0.2931491  | 0.76940819 | 0.90764437 |
| Tmco3       | 745.991847 | 0.09590534 | 0.22604045 | 0.42428397 | 0.67135873 | 0.86169525 |
| A730036I17R | 217.014637 | 0.09582058 | 0.30628976 | 0.31284293 | 0.7544     | 0.90191816 |
| Cited1      | 610.113762 | 0.09579255 | 0.43062423 | 0.22245044 | 0.82396325 | 0.93107393 |

|             |            |            |            |            |            |            |
|-------------|------------|------------|------------|------------|------------|------------|
| Atp9a       | 4624.48868 | 0.09576794 | 0.1789248  | 0.5352413  | 0.59248301 | 0.81685504 |
| LOC1026324  | 2.0352497  | 0.09576707 | 0.31483733 | 0.30417953 | 0.76099112 | NA         |
| Klk1b22     | 18.9815368 | 0.09573952 | 0.41456852 | 0.23093775 | 0.81736316 | 0.93024054 |
| Myl12a      | 12005.47   | 0.09569814 | 0.18750632 | 0.51037285 | 0.60979027 | 0.82596491 |
| Taf1d       | 9245.53294 | 0.09563525 | 0.21950104 | 0.43569384 | 0.66305887 | 0.85645621 |
| Cenpm       | 4513.77542 | 0.09560308 | 0.24540053 | 0.38957978 | 0.6968473  | 0.87645821 |
| Snora20     | 5.66362177 | 0.09554082 | 0.40433046 | 0.2362939  | 0.81320462 | NA         |
| Crhbp       | 3.97560331 | 0.09551772 | 0.37791478 | 0.25274936 | 0.8004619  | NA         |
| Taf13       | 1202.8281  | 0.09551487 | 0.19632221 | 0.48652094 | 0.62659786 | 0.83469537 |
| Nat10       | 9060.31022 | 0.09548187 | 0.18912193 | 0.50486938 | 0.61365058 | 0.82850171 |
| Ctdnep1     | 2361.51279 | 0.09546236 | 0.18710057 | 0.5102195  | 0.60989769 | 0.82596711 |
| Trim67      | 46.5040331 | 0.09545578 | 0.42327623 | 0.22551651 | 0.82157749 | 0.93076517 |
| Znrf4       | 1.40775923 | 0.09537285 | 0.25831504 | 0.36921136 | 0.71197019 | NA         |
| Myo15       | 97.1196535 | 0.0953626  | 0.38276133 | 0.24914376 | 0.80324958 | 0.92355442 |
| Extl1       | 591.001254 | 0.0952258  | 0.23444038 | 0.40618343 | 0.68460783 | 0.86933674 |
| Ajuba       | 6492.31965 | 0.09519166 | 0.19978567 | 0.47646891 | 0.63374035 | 0.83910568 |
| C920021L13F | 8.13197236 | 0.09516758 | 0.42863802 | 0.2220232  | 0.82429583 | 0.93107393 |
| Rrp12       | 6420.2419  | 0.09508668 | 0.21031649 | 0.45211233 | 0.65118806 | 0.8494066  |
| Btbd18      | 178.969198 | 0.09508643 | 0.32582817 | 0.29182998 | 0.77041662 | 0.90826254 |
| Atp5g1      | 8981.20421 | 0.09506704 | 0.20093119 | 0.47313234 | 0.63611877 | 0.84003761 |
| Dock11      | 2767.72145 | 0.0950485  | 0.30838426 | 0.3082145  | 0.75791912 | 0.90307174 |
| Lsp1        | 12.5836986 | 0.09504182 | 0.43000514 | 0.22102484 | 0.82507309 | 0.9313139  |
| Me3         | 1.77312973 | 0.09502254 | 0.30511107 | 0.31143588 | 0.75546928 | NA         |
| Glis2       | 1861.78443 | 0.09500599 | 0.25416591 | 0.37379515 | 0.70855673 | 0.88125982 |
| 1700001G17I | 4.20497553 | 0.09498835 | 0.39807987 | 0.23861631 | 0.81140312 | NA         |
| Wdr27       | 3.63959148 | 0.09495756 | 0.37611225 | 0.25247132 | 0.80067678 | NA         |
| Atxn2       | 4690.63583 | 0.0949222  | 0.20848687 | 0.45529103 | 0.64889988 | 0.84862854 |
| 1700086L19F | 0.79695593 | 0.09487671 | 0.19488473 | 0.48683499 | 0.62637527 | NA         |
| Aplnr       | 0.79695593 | 0.09487671 | 0.19488473 | 0.48683499 | 0.62637527 | NA         |
| Azin1       | 10505.2967 | 0.09485831 | 0.20848563 | 0.45498727 | 0.6491184  | 0.84869184 |
| Plcx3       | 3.7188834  | 0.09485745 | 0.2602893  | 0.36443083 | 0.71553632 | NA         |
| H2-Aa       | 15.6697158 | 0.0946271  | 0.43224551 | 0.21891979 | 0.82671253 | 0.93181174 |
| Atpaf2      | 2115.836   | 0.09461366 | 0.23704056 | 0.39914546 | 0.68978603 | 0.87274124 |
| Six5        | 256.115904 | 0.09458653 | 0.26055688 | 0.36301681 | 0.71659233 | 0.88475711 |
| Dpep2       | 18.5342456 | 0.09448039 | 0.43064527 | 0.2193926  | 0.82634424 | 0.93166673 |
| Megf11      | 674.914915 | 0.09434681 | 0.39906212 | 0.23642136 | 0.81310572 | 0.92878688 |
| Smap1       | 5473.64122 | 0.09431973 | 0.16256442 | 0.58019912 | 0.56178035 | 0.79905798 |
| Mycl        | 2784.36998 | 0.09430742 | 0.1969449  | 0.47885182 | 0.63204405 | 0.83803418 |
| Btrc        | 4143.74025 | 0.09429986 | 0.15200591 | 0.62036967 | 0.53501444 | 0.78005097 |
| Zgpat       | 1670.75438 | 0.09429614 | 0.17527131 | 0.53800101 | 0.59057635 | 0.81563524 |
| Myoz3       | 33.5593989 | 0.09429148 | 0.40146351 | 0.23486936 | 0.81431013 | 0.92878688 |

|             |            |            |            |            |            |            |
|-------------|------------|------------|------------|------------|------------|------------|
| Lrrc8b      | 319.33192  | 0.09427122 | 0.35678238 | 0.2642261  | 0.7916057  | 0.91860434 |
| Cd3eap      | 3593.42167 | 0.09423077 | 0.20052346 | 0.46992393 | 0.63840937 | 0.8418472  |
| Hsd17b1     | 59.4512332 | 0.09421872 | 0.3985455  | 0.23640644 | 0.8131173  | 0.92878688 |
| Yipf5       | 3767.35033 | 0.09419824 | 0.16108289 | 0.58478119 | 0.55869485 | 0.79686909 |
| Hgsnat      | 2656.85713 | 0.0941651  | 0.22080362 | 0.42646536 | 0.66976879 | 0.86064902 |
| Mdfic       | 2971.89457 | 0.09412489 | 0.16422643 | 0.57314092 | 0.56654929 | 0.80239311 |
| Fgd5        | 201.00075  | 0.09401848 | 0.27978713 | 0.33603576 | 0.7368439  | 0.89391803 |
| Tmem14c     | 5539.17771 | 0.09391831 | 0.19802175 | 0.47428281 | 0.63529825 | 0.83955149 |
| Uba5        | 3683.1038  | 0.09379009 | 0.16290806 | 0.57572407 | 0.5648017  | 0.8012435  |
| Map3k12     | 1773.80191 | 0.09374275 | 0.1796097  | 0.52192477 | 0.60172271 | 0.82168861 |
| Gm10336     | 2160.97768 | 0.09363903 | 0.17166682 | 0.54546963 | 0.58543056 | 0.81209791 |
| Adam21      | 6.54941948 | 0.09362081 | 0.40841347 | 0.22923047 | 0.81868979 | 0.93036217 |
| Sec61a2     | 3566.44221 | 0.09362081 | 0.1795785  | 0.52133642 | 0.60213243 | 0.82203156 |
| Gid8        | 7256.99429 | 0.09360413 | 0.18824851 | 0.497237   | 0.61902193 | 0.83090659 |
| Myrip       | 28.3805908 | 0.09358909 | 0.39733411 | 0.23554255 | 0.81378766 | 0.92878688 |
| Fam107b     | 2781.9526  | 0.09347244 | 0.17740444 | 0.52688894 | 0.59827071 | 0.81984777 |
| Slc25a2     | 22.5330393 | 0.09344646 | 0.42652017 | 0.21909037 | 0.82657965 | 0.93181174 |
| Asb6        | 1877.77474 | 0.09323592 | 0.20988517 | 0.44422345 | 0.65688104 | 0.85275541 |
| Vti1b       | 3104.92061 | 0.09321452 | 0.17970555 | 0.51870698 | 0.60396509 | 0.82288924 |
| Sh3tc1      | 1958.62335 | 0.09309735 | 0.1963681  | 0.47409608 | 0.63543139 | 0.83955765 |
| Dffb        | 675.216451 | 0.09308419 | 0.1894246  | 0.491405   | 0.62314003 | 0.83265488 |
| Alpl        | 22871.0676 | 0.09301915 | 0.17333971 | 0.5366292  | 0.59152377 | 0.81629125 |
| Med10       | 2707.44315 | 0.09291469 | 0.15676814 | 0.59268863 | 0.55338955 | 0.79250032 |
| Arfgap2     | 3588.69072 | 0.09288585 | 0.17478038 | 0.53144319 | 0.5951117  | 0.81809904 |
| Slc30a8     | 0.16414504 | 0.09287588 | 0.15274532 | 0.60804404 | 0.54315827 | NA         |
| Kynu        | 0.16414504 | 0.09287588 | 0.15274532 | 0.60804404 | 0.54315827 | NA         |
| Kncn        | 0.16414504 | 0.09287588 | 0.15274532 | 0.60804404 | 0.54315827 | NA         |
| Olf214      | 0.16414504 | 0.09287588 | 0.15274532 | 0.60804404 | 0.54315827 | NA         |
| Olf1453     | 0.16414504 | 0.09287588 | 0.15274532 | 0.60804404 | 0.54315827 | NA         |
| Opcml       | 0.16414504 | 0.09287588 | 0.15274532 | 0.60804404 | 0.54315827 | NA         |
| Gm10636     | 0.16414504 | 0.09287588 | 0.15274532 | 0.60804404 | 0.54315827 | NA         |
| Mptx2       | 0.16414504 | 0.09287588 | 0.15274532 | 0.60804404 | 0.54315827 | NA         |
| Adh6a       | 0.16414504 | 0.09287588 | 0.15274532 | 0.60804404 | 0.54315827 | NA         |
| 4933431G14I | 0.16414504 | 0.09287588 | 0.15274532 | 0.60804404 | 0.54315827 | NA         |
| Tchhl1      | 0.16414504 | 0.09287588 | 0.15274532 | 0.60804404 | 0.54315827 | NA         |
| 1700095A21f | 0.16414504 | 0.09287588 | 0.15274532 | 0.60804404 | 0.54315827 | NA         |
| Smlr1       | 0.16414504 | 0.09287588 | 0.15274532 | 0.60804404 | 0.54315827 | NA         |
| 1700003P14F | 0.16414504 | 0.09287588 | 0.15274532 | 0.60804404 | 0.54315827 | NA         |
| Cyp3a59     | 0.16414504 | 0.09287588 | 0.15274532 | 0.60804404 | 0.54315827 | NA         |
| Mir6994     | 0.16414504 | 0.09287588 | 0.15274532 | 0.60804404 | 0.54315827 | NA         |
| Gm3086      | 0.16414504 | 0.09287588 | 0.15274532 | 0.60804404 | 0.54315827 | NA         |

|             |            |            |            |            |            |    |
|-------------|------------|------------|------------|------------|------------|----|
| Gm6213      | 0.16414504 | 0.09287588 | 0.15274532 | 0.60804404 | 0.54315827 | NA |
| Gldn        | 0.16414504 | 0.09287588 | 0.15274532 | 0.60804404 | 0.54315827 | NA |
| Slco6c1     | 0.16414504 | 0.09287588 | 0.15274532 | 0.60804404 | 0.54315827 | NA |
| 1700030L20F | 0.16414504 | 0.09287588 | 0.15274532 | 0.60804404 | 0.54315827 | NA |
| 1700012B09F | 0.16414504 | 0.09287588 | 0.15274532 | 0.60804404 | 0.54315827 | NA |
| 4921524L21F | 0.16414504 | 0.09287588 | 0.15274532 | 0.60804404 | 0.54315827 | NA |
| Lgals6      | 0.16414504 | 0.09287588 | 0.15274532 | 0.60804404 | 0.54315827 | NA |
| Mir1b       | 0.16414504 | 0.09287588 | 0.15274532 | 0.60804404 | 0.54315827 | NA |
| Sorbs2os    | 0.16414504 | 0.09287588 | 0.15274532 | 0.60804404 | 0.54315827 | NA |
| Zc2hc1b     | 0.16414504 | 0.09287588 | 0.15274532 | 0.60804404 | 0.54315827 | NA |
| Olf361      | 0.16414504 | 0.09287588 | 0.15274532 | 0.60804404 | 0.54315827 | NA |
| Olf705      | 0.16414504 | 0.09287588 | 0.15274532 | 0.60804404 | 0.54315827 | NA |
| Cd226       | 0.16414504 | 0.09287588 | 0.15274532 | 0.60804404 | 0.54315827 | NA |
| Gfra2       | 0.16414504 | 0.09287588 | 0.15274532 | 0.60804404 | 0.54315827 | NA |
| Cd209c      | 0.16414504 | 0.09287588 | 0.15274532 | 0.60804404 | 0.54315827 | NA |
| Acsm2       | 0.16414504 | 0.09287588 | 0.15274532 | 0.60804404 | 0.54315827 | NA |
| Raly1       | 0.16414504 | 0.09287588 | 0.15274532 | 0.60804404 | 0.54315827 | NA |
| I13ra2      | 0.16414504 | 0.09287588 | 0.15274532 | 0.60804404 | 0.54315827 | NA |
| Ctsm        | 0.16414504 | 0.09287588 | 0.15274532 | 0.60804404 | 0.54315827 | NA |
| Mdga2       | 0.16414504 | 0.09287588 | 0.15274532 | 0.60804404 | 0.54315827 | NA |
| Olf834      | 0.16414504 | 0.09287588 | 0.15274532 | 0.60804404 | 0.54315827 | NA |
| Fam162b     | 0.16414504 | 0.09287588 | 0.15274532 | 0.60804404 | 0.54315827 | NA |
| Oog4        | 0.16414504 | 0.09287588 | 0.15274532 | 0.60804404 | 0.54315827 | NA |
| Gm1553      | 0.16414504 | 0.09287588 | 0.15274532 | 0.60804404 | 0.54315827 | NA |
| Pcdha10     | 0.16414504 | 0.09287588 | 0.15274532 | 0.60804404 | 0.54315827 | NA |
| Gm7337      | 0.16414504 | 0.09287588 | 0.15274532 | 0.60804404 | 0.54315827 | NA |
| Tas2r139    | 0.16414504 | 0.09287588 | 0.15274532 | 0.60804404 | 0.54315827 | NA |
| 1810046K07F | 0.16414504 | 0.09287588 | 0.15274532 | 0.60804404 | 0.54315827 | NA |
| Nlrp1a      | 0.16414504 | 0.09287588 | 0.15274532 | 0.60804404 | 0.54315827 | NA |
| Gm9999      | 0.16414504 | 0.09287588 | 0.15274532 | 0.60804404 | 0.54315827 | NA |
| 4930443O20I | 0.16414504 | 0.09287588 | 0.15274532 | 0.60804404 | 0.54315827 | NA |
| Msr1        | 0.16414504 | 0.09287588 | 0.15274532 | 0.60804404 | 0.54315827 | NA |
| Ugt2b38     | 0.16414504 | 0.09287588 | 0.15274532 | 0.60804404 | 0.54315827 | NA |
| Olf267      | 0.16414504 | 0.09287588 | 0.15274532 | 0.60804404 | 0.54315827 | NA |
| Kcnh5       | 0.16414504 | 0.09287588 | 0.15274532 | 0.60804404 | 0.54315827 | NA |
| 1700025M24  | 0.16414504 | 0.09287588 | 0.15274532 | 0.60804404 | 0.54315827 | NA |
| Fam187a     | 0.16414504 | 0.09287588 | 0.15274532 | 0.60804404 | 0.54315827 | NA |
| Krt82       | 0.16414504 | 0.09287588 | 0.15274532 | 0.60804404 | 0.54315827 | NA |
| Gm5485      | 0.16414504 | 0.09287588 | 0.15274532 | 0.60804404 | 0.54315827 | NA |
| Tnfrsf11b   | 0.16414504 | 0.09287588 | 0.15274532 | 0.60804404 | 0.54315827 | NA |
| Lyg2        | 0.16414504 | 0.09287588 | 0.15274532 | 0.60804404 | 0.54315827 | NA |

|             |            |            |            |            |            |    |
|-------------|------------|------------|------------|------------|------------|----|
| Trim58      | 0.16414504 | 0.09287588 | 0.15274532 | 0.60804404 | 0.54315827 | NA |
| Spata9      | 0.16414504 | 0.09287588 | 0.15274532 | 0.60804404 | 0.54315827 | NA |
| Ncr1        | 0.16414504 | 0.09287588 | 0.15274532 | 0.60804404 | 0.54315827 | NA |
| Ifi47       | 0.16414504 | 0.09287588 | 0.15274532 | 0.60804404 | 0.54315827 | NA |
| Abhd12b     | 0.16414504 | 0.09287588 | 0.15274532 | 0.60804404 | 0.54315827 | NA |
| Cd93        | 0.16414504 | 0.09287588 | 0.15274532 | 0.60804404 | 0.54315827 | NA |
| Slamf8      | 0.16414504 | 0.09287588 | 0.15274532 | 0.60804404 | 0.54315827 | NA |
| 3110039M20  | 0.16414504 | 0.09287588 | 0.15274532 | 0.60804404 | 0.54315827 | NA |
| Tfec        | 0.16414504 | 0.09287588 | 0.15274532 | 0.60804404 | 0.54315827 | NA |
| Krt73       | 0.16414504 | 0.09287588 | 0.15274532 | 0.60804404 | 0.54315827 | NA |
| Krt85       | 0.16414504 | 0.09287588 | 0.15274532 | 0.60804404 | 0.54315827 | NA |
| Serpinb13   | 0.16414504 | 0.09287588 | 0.15274532 | 0.60804404 | 0.54315827 | NA |
| Pet117      | 0.16414504 | 0.09287588 | 0.15274532 | 0.60804404 | 0.54315827 | NA |
| Vsig4       | 0.16414504 | 0.09287588 | 0.15274532 | 0.60804404 | 0.54315827 | NA |
| Tmem26      | 0.16414504 | 0.09287588 | 0.15274532 | 0.60804404 | 0.54315827 | NA |
| Pcdhb16     | 0.16414504 | 0.09287588 | 0.15274532 | 0.60804404 | 0.54315827 | NA |
| Mir16-1     | 0.16414504 | 0.09287588 | 0.15274532 | 0.60804404 | 0.54315827 | NA |
| Olf293      | 0.16414504 | 0.09287588 | 0.15274532 | 0.60804404 | 0.54315827 | NA |
| Klri1       | 0.16414504 | 0.09287588 | 0.15274532 | 0.60804404 | 0.54315827 | NA |
| Slc5a7      | 0.16414504 | 0.09287588 | 0.15274532 | 0.60804404 | 0.54315827 | NA |
| Gm10494     | 0.16414504 | 0.09287588 | 0.15274532 | 0.60804404 | 0.54315827 | NA |
| Zcchc5      | 0.16414504 | 0.09287588 | 0.15274532 | 0.60804404 | 0.54315827 | NA |
| Tigd4       | 0.16414504 | 0.09287588 | 0.15274532 | 0.60804404 | 0.54315827 | NA |
| Slc17a8     | 0.16414504 | 0.09287588 | 0.15274532 | 0.60804404 | 0.54315827 | NA |
| Trhr2       | 0.16414504 | 0.09287588 | 0.15274532 | 0.60804404 | 0.54315827 | NA |
| Myct1       | 0.16414504 | 0.09287588 | 0.15274532 | 0.60804404 | 0.54315827 | NA |
| Pate4       | 0.16414504 | 0.09287588 | 0.15274532 | 0.60804404 | 0.54315827 | NA |
| A630012P03f | 0.16414504 | 0.09287588 | 0.15274532 | 0.60804404 | 0.54315827 | NA |
| Lsmem1      | 0.16414504 | 0.09287588 | 0.15274532 | 0.60804404 | 0.54315827 | NA |
| Gm11166     | 0.16414504 | 0.09287588 | 0.15274532 | 0.60804404 | 0.54315827 | NA |
| Evx2        | 0.16414504 | 0.09287588 | 0.15274532 | 0.60804404 | 0.54315827 | NA |
| Fbxw18      | 0.16414504 | 0.09287588 | 0.15274532 | 0.60804404 | 0.54315827 | NA |
| Tmem150cos  | 0.16414504 | 0.09287588 | 0.15274532 | 0.60804404 | 0.54315827 | NA |
| Reg3b       | 0.16414504 | 0.09287588 | 0.15274532 | 0.60804404 | 0.54315827 | NA |
| Grxcr1      | 0.16414504 | 0.09287588 | 0.15274532 | 0.60804404 | 0.54315827 | NA |
| Gm12185     | 0.16414504 | 0.09287588 | 0.15274532 | 0.60804404 | 0.54315827 | NA |
| Olf45       | 0.16414504 | 0.09287588 | 0.15274532 | 0.60804404 | 0.54315827 | NA |
| Gpr15       | 0.16414504 | 0.09287588 | 0.15274532 | 0.60804404 | 0.54315827 | NA |
| Nlrp2       | 0.16414504 | 0.09287588 | 0.15274532 | 0.60804404 | 0.54315827 | NA |
| Dmrtc1a     | 0.16414504 | 0.09287588 | 0.15274532 | 0.60804404 | 0.54315827 | NA |
| Tctex1d1    | 0.16414504 | 0.09287588 | 0.15274532 | 0.60804404 | 0.54315827 | NA |

|             |            |            |            |            |            |    |
|-------------|------------|------------|------------|------------|------------|----|
| 1110036E04F | 0.16414504 | 0.09287588 | 0.15274532 | 0.60804404 | 0.54315827 | NA |
| Olfr70      | 0.16414504 | 0.09287588 | 0.15274532 | 0.60804404 | 0.54315827 | NA |
| Ifnk        | 0.16414504 | 0.09287588 | 0.15274532 | 0.60804404 | 0.54315827 | NA |
| Enpp6       | 0.16414504 | 0.09287588 | 0.15274532 | 0.60804404 | 0.54315827 | NA |
| 1700092C10F | 0.16414504 | 0.09287588 | 0.15274532 | 0.60804404 | 0.54315827 | NA |
| Ceacam13    | 0.16414504 | 0.09287588 | 0.15274532 | 0.60804404 | 0.54315827 | NA |
| Vmn2r72     | 0.16414504 | 0.09287588 | 0.15274532 | 0.60804404 | 0.54315827 | NA |
| Olfr128     | 0.16414504 | 0.09287588 | 0.15274532 | 0.60804404 | 0.54315827 | NA |
| Mir6345     | 0.16414504 | 0.09287588 | 0.15274532 | 0.60804404 | 0.54315827 | NA |
| Slc39a12    | 0.16414504 | 0.09287588 | 0.15274532 | 0.60804404 | 0.54315827 | NA |
| Gpr174      | 0.16414504 | 0.09287588 | 0.15274532 | 0.60804404 | 0.54315827 | NA |
| Mir6963     | 0.16414504 | 0.09287588 | 0.15274532 | 0.60804404 | 0.54315827 | NA |
| Tnf         | 0.16414504 | 0.09287588 | 0.15274532 | 0.60804404 | 0.54315827 | NA |
| Pcdha1      | 0.16414504 | 0.09287588 | 0.15274532 | 0.60804404 | 0.54315827 | NA |
| Defb34      | 0.16414504 | 0.09287588 | 0.15274532 | 0.60804404 | 0.54315827 | NA |
| 4930579F01F | 0.16414504 | 0.09287588 | 0.15274532 | 0.60804404 | 0.54315827 | NA |
| Cpne6       | 0.16414504 | 0.09287588 | 0.15274532 | 0.60804404 | 0.54315827 | NA |
| Mir3474     | 0.16414504 | 0.09287588 | 0.15274532 | 0.60804404 | 0.54315827 | NA |
| Mrgprh      | 0.16414504 | 0.09287588 | 0.15274532 | 0.60804404 | 0.54315827 | NA |
| Ctla2b      | 0.16414504 | 0.09287588 | 0.15274532 | 0.60804404 | 0.54315827 | NA |
| Lipm        | 0.16414504 | 0.09287588 | 0.15274532 | 0.60804404 | 0.54315827 | NA |
| Vwde        | 0.16414504 | 0.09287588 | 0.15274532 | 0.60804404 | 0.54315827 | NA |
| Dok6        | 0.16414504 | 0.09287588 | 0.15274532 | 0.60804404 | 0.54315827 | NA |
| Mir6969     | 0.16414504 | 0.09287588 | 0.15274532 | 0.60804404 | 0.54315827 | NA |
| ERCC-00046  | 0.16414504 | 0.09287588 | 0.15274532 | 0.60804404 | 0.54315827 | NA |
| 4933416M06  | 0.16414504 | 0.09287588 | 0.15274532 | 0.60804404 | 0.54315827 | NA |
| Spaca3      | 0.16414504 | 0.09287588 | 0.15274532 | 0.60804404 | 0.54315827 | NA |
| Gm6408      | 0.16414504 | 0.09287588 | 0.15274532 | 0.60804404 | 0.54315827 | NA |
| Cyp4b1      | 0.16414504 | 0.09287588 | 0.15274532 | 0.60804404 | 0.54315827 | NA |
| Mir7075     | 0.16414504 | 0.09287588 | 0.15274532 | 0.60804404 | 0.54315827 | NA |
| Kcnj8       | 0.16414504 | 0.09287588 | 0.15274532 | 0.60804404 | 0.54315827 | NA |
| Apol9b      | 0.16414504 | 0.09287588 | 0.15274532 | 0.60804404 | 0.54315827 | NA |
| Rxrg        | 0.16414504 | 0.09287588 | 0.15274532 | 0.60804404 | 0.54315827 | NA |
| Krt9        | 0.16414504 | 0.09287588 | 0.15274532 | 0.60804404 | 0.54315827 | NA |
| 1700080E11F | 0.16414504 | 0.09287588 | 0.15274532 | 0.60804404 | 0.54315827 | NA |
| Trpc4       | 0.16414504 | 0.09287588 | 0.15274532 | 0.60804404 | 0.54315827 | NA |
| Dupd1       | 0.16414504 | 0.09287588 | 0.15274532 | 0.60804404 | 0.54315827 | NA |
| Pcdh15      | 0.16414504 | 0.09287588 | 0.15274532 | 0.60804404 | 0.54315827 | NA |
| Mir146      | 0.16414504 | 0.09287588 | 0.15274532 | 0.60804404 | 0.54315827 | NA |
| 4732456N10I | 0.16414504 | 0.09287588 | 0.15274532 | 0.60804404 | 0.54315827 | NA |
| Gabrb1      | 0.16414504 | 0.09287588 | 0.15274532 | 0.60804404 | 0.54315827 | NA |

|             |            |            |            |            |            |            |
|-------------|------------|------------|------------|------------|------------|------------|
| Mir30c-1    | 0.16414504 | 0.09287588 | 0.15274532 | 0.60804404 | 0.54315827 | NA         |
| Defb45      | 0.16414504 | 0.09287588 | 0.15274532 | 0.60804404 | 0.54315827 | NA         |
| 4930595M18  | 0.16414504 | 0.09287588 | 0.15274532 | 0.60804404 | 0.54315827 | NA         |
| 4932702P03F | 0.16414504 | 0.09287588 | 0.15274532 | 0.60804404 | 0.54315827 | NA         |
| Olf960      | 0.16414504 | 0.09287588 | 0.15274532 | 0.60804404 | 0.54315827 | NA         |
| Dcx         | 0.16414504 | 0.09287588 | 0.15274532 | 0.60804404 | 0.54315827 | NA         |
| Arhgap20os  | 0.16414504 | 0.09287588 | 0.15274532 | 0.60804404 | 0.54315827 | NA         |
| Rprl2       | 0.16414504 | 0.09287588 | 0.15274532 | 0.60804404 | 0.54315827 | NA         |
| Ccdc185     | 0.16414504 | 0.09287588 | 0.15274532 | 0.60804404 | 0.54315827 | NA         |
| Arhgap15    | 0.16414504 | 0.09287588 | 0.15274532 | 0.60804404 | 0.54315827 | NA         |
| 1700066N21I | 0.16414504 | 0.09287588 | 0.15274532 | 0.60804404 | 0.54315827 | NA         |
| Mir199a-1   | 0.16414504 | 0.09287588 | 0.15274532 | 0.60804404 | 0.54315827 | NA         |
| Erp27       | 0.16414504 | 0.09287588 | 0.15274532 | 0.60804404 | 0.54315827 | NA         |
| Gm10790     | 0.16414504 | 0.09287588 | 0.15274532 | 0.60804404 | 0.54315827 | NA         |
| Rfx6        | 0.16414504 | 0.09287588 | 0.15274532 | 0.60804404 | 0.54315827 | NA         |
| Skint5      | 0.16414504 | 0.09287588 | 0.15274532 | 0.60804404 | 0.54315827 | NA         |
| Tmem174     | 0.16414504 | 0.09287588 | 0.15274532 | 0.60804404 | 0.54315827 | NA         |
| Tnmd        | 0.16414504 | 0.09287588 | 0.15274532 | 0.60804404 | 0.54315827 | NA         |
| 1700027I24R | 0.16414504 | 0.09287588 | 0.15274532 | 0.60804404 | 0.54315827 | NA         |
| Mycs        | 0.16414504 | 0.09287588 | 0.15274532 | 0.60804404 | 0.54315827 | NA         |
| Gprc6a      | 0.16414504 | 0.09287588 | 0.15274532 | 0.60804404 | 0.54315827 | NA         |
| Gm15008     | 0.16414504 | 0.09287588 | 0.15274532 | 0.60804404 | 0.54315827 | NA         |
| Dsg1b       | 0.16414504 | 0.09287588 | 0.15274532 | 0.60804404 | 0.54315827 | NA         |
| 4930455F16F | 0.16414504 | 0.09287588 | 0.15274532 | 0.60804404 | 0.54315827 | NA         |
| Cstl1       | 0.16414504 | 0.09287588 | 0.15274532 | 0.60804404 | 0.54315827 | NA         |
| Grm7        | 0.16414504 | 0.09287588 | 0.15274532 | 0.60804404 | 0.54315827 | NA         |
| Cyp3a44     | 0.16414504 | 0.09287588 | 0.15274532 | 0.60804404 | 0.54315827 | NA         |
| 4930542D17I | 0.16414504 | 0.09287588 | 0.15274532 | 0.60804404 | 0.54315827 | NA         |
| Olf1406     | 0.16414504 | 0.09287588 | 0.15274532 | 0.60804404 | 0.54315827 | NA         |
| Angptl2     | 96.943566  | 0.09287149 | 0.29090843 | 0.31924646 | 0.74953963 | 0.90084943 |
| Muc20       | 12.1271279 | 0.09279793 | 0.43226962 | 0.21467604 | 0.8300199  | 0.93350976 |
| Il2ra       | 1.18096692 | 0.09276354 | 0.18343813 | 0.50569387 | 0.61307157 | NA         |
| Tmem240     | 4.12954904 | 0.09271389 | 0.39217902 | 0.23640707 | 0.81311681 | NA         |
| Snx19       | 1168.83712 | 0.09271013 | 0.20549813 | 0.4511483  | 0.65188267 | 0.84981368 |
| Tomm5       | 2677.6846  | 0.09257395 | 0.22038405 | 0.42005739 | 0.67444353 | 0.86375836 |
| Rsph6a      | 4.83199881 | 0.09253227 | 0.39340575 | 0.23520823 | 0.81404712 | NA         |
| Plb1        | 58.7320946 | 0.09249571 | 0.36218486 | 0.25538259 | 0.79842761 | 0.92164102 |
| Htr2a       | 0.97541245 | 0.09246289 | 0.18209566 | 0.50777098 | 0.61161396 | NA         |
| Vmn2r18     | 0.97541245 | 0.09246289 | 0.18209566 | 0.50777098 | 0.61161396 | NA         |
| Notch3      | 3933.63633 | 0.09246015 | 0.25625774 | 0.36080919 | 0.71824209 | 0.88550762 |
| Phlda3      | 3792.96789 | 0.09237664 | 0.16171251 | 0.57123992 | 0.56783702 | 0.80306738 |

|             |            |            |            |            |            |            |
|-------------|------------|------------|------------|------------|------------|------------|
| Pkd2        | 2202.9433  | 0.09230142 | 0.24786359 | 0.37238795 | 0.70960402 | 0.88174608 |
| Al747448    | 1.33565419 | 0.09227314 | 0.2160025  | 0.4271855  | 0.66924422 | NA         |
| Crygn       | 19.5487328 | 0.09216503 | 0.42509829 | 0.21680875 | 0.82835739 | 0.93256314 |
| Csmd2os     | 0.78980019 | 0.09210473 | 0.19266453 | 0.47805754 | 0.63260925 | NA         |
| Ctcflos     | 0.78980019 | 0.09210473 | 0.19266453 | 0.47805754 | 0.63260925 | NA         |
| Ing4        | 2332.71254 | 0.09208762 | 0.19193762 | 0.47977889 | 0.63138462 | 0.83751629 |
| Coro6       | 123.870661 | 0.09199189 | 0.4141038  | 0.22214695 | 0.82419949 | 0.93107393 |
| Gm3458      | 0.15698929 | 0.09186002 | 0.15199284 | 0.60437069 | 0.54559722 | NA         |
| Il21        | 0.15698929 | 0.09186002 | 0.15199284 | 0.60437069 | 0.54559722 | NA         |
| Muc5b       | 0.15698929 | 0.09186002 | 0.15199284 | 0.60437069 | 0.54559722 | NA         |
| Gm5105      | 0.15698929 | 0.09186002 | 0.15199284 | 0.60437069 | 0.54559722 | NA         |
| Mir758      | 0.15698929 | 0.09186002 | 0.15199284 | 0.60437069 | 0.54559722 | NA         |
| 1700034O15I | 0.15698929 | 0.09186002 | 0.15199284 | 0.60437069 | 0.54559722 | NA         |
| Calcb       | 0.15698929 | 0.09186002 | 0.15199284 | 0.60437069 | 0.54559722 | NA         |
| Olfr464     | 0.15698929 | 0.09186002 | 0.15199284 | 0.60437069 | 0.54559722 | NA         |
| 2810049E08F | 0.15698929 | 0.09186002 | 0.15199284 | 0.60437069 | 0.54559722 | NA         |
| Olfr972     | 0.15698929 | 0.09186002 | 0.15199284 | 0.60437069 | 0.54559722 | NA         |
| Mir92b      | 0.15698929 | 0.09186002 | 0.15199284 | 0.60437069 | 0.54559722 | NA         |
| 4931430N09I | 0.15698929 | 0.09186002 | 0.15199284 | 0.60437069 | 0.54559722 | NA         |
| Al314278    | 0.15698929 | 0.09186002 | 0.15199284 | 0.60437069 | 0.54559722 | NA         |
| Gm19522     | 0.15698929 | 0.09186002 | 0.15199284 | 0.60437069 | 0.54559722 | NA         |
| 2310061N02I | 0.15698929 | 0.09186002 | 0.15199284 | 0.60437069 | 0.54559722 | NA         |
| Gm19299     | 0.15698929 | 0.09186002 | 0.15199284 | 0.60437069 | 0.54559722 | NA         |
| Slc9c1      | 0.15698929 | 0.09186002 | 0.15199284 | 0.60437069 | 0.54559722 | NA         |
| Gm19990     | 0.15698929 | 0.09186002 | 0.15199284 | 0.60437069 | 0.54559722 | NA         |
| 1700109K24F | 0.15698929 | 0.09186002 | 0.15199284 | 0.60437069 | 0.54559722 | NA         |
| Mir6989     | 0.15698929 | 0.09186002 | 0.15199284 | 0.60437069 | 0.54559722 | NA         |
| 4930524O05I | 0.15698929 | 0.09186002 | 0.15199284 | 0.60437069 | 0.54559722 | NA         |
| Rhox11      | 0.15698929 | 0.09186002 | 0.15199284 | 0.60437069 | 0.54559722 | NA         |
| Bc1         | 0.15698929 | 0.09186002 | 0.15199284 | 0.60437069 | 0.54559722 | NA         |
| 1700113H08I | 0.15698929 | 0.09186002 | 0.15199284 | 0.60437069 | 0.54559722 | NA         |
| Grm1        | 0.15698929 | 0.09186002 | 0.15199284 | 0.60437069 | 0.54559722 | NA         |
| B230319C09F | 0.15698929 | 0.09186002 | 0.15199284 | 0.60437069 | 0.54559722 | NA         |
| Vmn2r111    | 0.15698929 | 0.09186002 | 0.15199284 | 0.60437069 | 0.54559722 | NA         |
| Olfr699     | 0.15698929 | 0.09186002 | 0.15199284 | 0.60437069 | 0.54559722 | NA         |
| Rag1        | 0.15698929 | 0.09186002 | 0.15199284 | 0.60437069 | 0.54559722 | NA         |
| Tex37       | 0.15698929 | 0.09186002 | 0.15199284 | 0.60437069 | 0.54559722 | NA         |
| Tlr13       | 0.15698929 | 0.09186002 | 0.15199284 | 0.60437069 | 0.54559722 | NA         |
| Cyp2j5      | 0.15698929 | 0.09186002 | 0.15199284 | 0.60437069 | 0.54559722 | NA         |
| Olfr324     | 0.15698929 | 0.09186002 | 0.15199284 | 0.60437069 | 0.54559722 | NA         |
| Pcdhb20     | 0.15698929 | 0.09186002 | 0.15199284 | 0.60437069 | 0.54559722 | NA         |



|             |            |            |            |            |            |    |
|-------------|------------|------------|------------|------------|------------|----|
| 4933438B17F | 0.15698929 | 0.09186002 | 0.15199284 | 0.60437069 | 0.54559722 | NA |
| Gdf2        | 0.15698929 | 0.09186002 | 0.15199284 | 0.60437069 | 0.54559722 | NA |
| Tigit       | 0.15698929 | 0.09186002 | 0.15199284 | 0.60437069 | 0.54559722 | NA |
| Olf281      | 0.15698929 | 0.09186002 | 0.15199284 | 0.60437069 | 0.54559722 | NA |
| Olf281      | 0.15698929 | 0.09186002 | 0.15199284 | 0.60437069 | 0.54559722 | NA |
| 1700003G13I | 0.15698929 | 0.09186002 | 0.15199284 | 0.60437069 | 0.54559722 | NA |
| A530065N20  | 0.15698929 | 0.09186002 | 0.15199284 | 0.60437069 | 0.54559722 | NA |
| Gjb6        | 0.15698929 | 0.09186002 | 0.15199284 | 0.60437069 | 0.54559722 | NA |
| Lipk        | 0.15698929 | 0.09186002 | 0.15199284 | 0.60437069 | 0.54559722 | NA |
| Mir1955     | 0.15698929 | 0.09186002 | 0.15199284 | 0.60437069 | 0.54559722 | NA |
| Mir320      | 0.15698929 | 0.09186002 | 0.15199284 | 0.60437069 | 0.54559722 | NA |
| Olf373      | 0.15698929 | 0.09186002 | 0.15199284 | 0.60437069 | 0.54559722 | NA |
| Gm5415      | 0.15698929 | 0.09186002 | 0.15199284 | 0.60437069 | 0.54559722 | NA |
| Atp4b       | 0.15698929 | 0.09186002 | 0.15199284 | 0.60437069 | 0.54559722 | NA |
| 5430401F13F | 0.15698929 | 0.09186002 | 0.15199284 | 0.60437069 | 0.54559722 | NA |
| Cela3b      | 0.15698929 | 0.09186002 | 0.15199284 | 0.60437069 | 0.54559722 | NA |
| Hist1h2ba   | 0.15698929 | 0.09186002 | 0.15199284 | 0.60437069 | 0.54559722 | NA |
| Slurp1      | 0.15698929 | 0.09186002 | 0.15199284 | 0.60437069 | 0.54559722 | NA |
| Defb36      | 0.15698929 | 0.09186002 | 0.15199284 | 0.60437069 | 0.54559722 | NA |
| Mir8116     | 0.15698929 | 0.09186002 | 0.15199284 | 0.60437069 | 0.54559722 | NA |
| Avp         | 0.15698929 | 0.09186002 | 0.15199284 | 0.60437069 | 0.54559722 | NA |
| Gm10409     | 0.15698929 | 0.09186002 | 0.15199284 | 0.60437069 | 0.54559722 | NA |
| Mepe        | 0.15698929 | 0.09186002 | 0.15199284 | 0.60437069 | 0.54559722 | NA |
| Hs3st2      | 0.15698929 | 0.09186002 | 0.15199284 | 0.60437069 | 0.54559722 | NA |
| Il1a        | 0.15698929 | 0.09186002 | 0.15199284 | 0.60437069 | 0.54559722 | NA |
| Ang6        | 0.15698929 | 0.09186002 | 0.15199284 | 0.60437069 | 0.54559722 | NA |
| Cd27        | 0.15698929 | 0.09186002 | 0.15199284 | 0.60437069 | 0.54559722 | NA |
| 1700065O20I | 0.15698929 | 0.09186002 | 0.15199284 | 0.60437069 | 0.54559722 | NA |
| Gm5893      | 0.15698929 | 0.09186002 | 0.15199284 | 0.60437069 | 0.54559722 | NA |
| 1700060C16F | 0.15698929 | 0.09186002 | 0.15199284 | 0.60437069 | 0.54559722 | NA |
| Mir141      | 0.15698929 | 0.09186002 | 0.15199284 | 0.60437069 | 0.54559722 | NA |
| Obp2a       | 0.15698929 | 0.09186002 | 0.15199284 | 0.60437069 | 0.54559722 | NA |
| 1700122O11I | 0.15698929 | 0.09186002 | 0.15199284 | 0.60437069 | 0.54559722 | NA |
| 4930444F02F | 0.15698929 | 0.09186002 | 0.15199284 | 0.60437069 | 0.54559722 | NA |
| Gm6756      | 0.15698929 | 0.09186002 | 0.15199284 | 0.60437069 | 0.54559722 | NA |
| Pdcd1lg2    | 0.15698929 | 0.09186002 | 0.15199284 | 0.60437069 | 0.54559722 | NA |
| Tekt4       | 0.15698929 | 0.09186002 | 0.15199284 | 0.60437069 | 0.54559722 | NA |
| Il1f6       | 0.15698929 | 0.09186002 | 0.15199284 | 0.60437069 | 0.54559722 | NA |
| Nepn        | 0.15698929 | 0.09186002 | 0.15199284 | 0.60437069 | 0.54559722 | NA |
| Mir8106     | 0.15698929 | 0.09186002 | 0.15199284 | 0.60437069 | 0.54559722 | NA |
| Gm11149     | 0.15698929 | 0.09186002 | 0.15199284 | 0.60437069 | 0.54559722 | NA |

|              |            |            |            |            |            |            |
|--------------|------------|------------|------------|------------|------------|------------|
| Hrh4         | 0.15698929 | 0.09186002 | 0.15199284 | 0.60437069 | 0.54559722 | NA         |
| Ccl22        | 0.15698929 | 0.09186002 | 0.15199284 | 0.60437069 | 0.54559722 | NA         |
| 6430584L05F  | 0.15698929 | 0.09186002 | 0.15199284 | 0.60437069 | 0.54559722 | NA         |
| Cst11        | 0.15698929 | 0.09186002 | 0.15199284 | 0.60437069 | 0.54559722 | NA         |
| Hist3h2bb-ps | 0.15698929 | 0.09186002 | 0.15199284 | 0.60437069 | 0.54559722 | NA         |
| Gm14151      | 0.15698929 | 0.09186002 | 0.15199284 | 0.60437069 | 0.54559722 | NA         |
| Fbxw28       | 0.15698929 | 0.09186002 | 0.15199284 | 0.60437069 | 0.54559722 | NA         |
| Prop1        | 0.15698929 | 0.09186002 | 0.15199284 | 0.60437069 | 0.54559722 | NA         |
| Ccdc27       | 0.15698929 | 0.09186002 | 0.15199284 | 0.60437069 | 0.54559722 | NA         |
| Vmn2r55      | 0.15698929 | 0.09186002 | 0.15199284 | 0.60437069 | 0.54559722 | NA         |
| Ascl3        | 0.15698929 | 0.09186002 | 0.15199284 | 0.60437069 | 0.54559722 | NA         |
| Cx3cr1       | 0.15698929 | 0.09186002 | 0.15199284 | 0.60437069 | 0.54559722 | NA         |
| 5830403L16F  | 0.15698929 | 0.09186002 | 0.15199284 | 0.60437069 | 0.54559722 | NA         |
| Pah          | 0.15698929 | 0.09186002 | 0.15199284 | 0.60437069 | 0.54559722 | NA         |
| Prss43       | 0.15698929 | 0.09186002 | 0.15199284 | 0.60437069 | 0.54559722 | NA         |
| Mir5107      | 0.15698929 | 0.09186002 | 0.15199284 | 0.60437069 | 0.54559722 | NA         |
| Wfdc12       | 0.15698929 | 0.09186002 | 0.15199284 | 0.60437069 | 0.54559722 | NA         |
| Emr1         | 0.15698929 | 0.09186002 | 0.15199284 | 0.60437069 | 0.54559722 | NA         |
| Olfir875     | 0.15698929 | 0.09186002 | 0.15199284 | 0.60437069 | 0.54559722 | NA         |
| Mir370       | 0.15698929 | 0.09186002 | 0.15199284 | 0.60437069 | 0.54559722 | NA         |
| Mir3094      | 0.15698929 | 0.09186002 | 0.15199284 | 0.60437069 | 0.54559722 | NA         |
| Cts7         | 0.15698929 | 0.09186002 | 0.15199284 | 0.60437069 | 0.54559722 | NA         |
| Mir6417      | 0.15698929 | 0.09186002 | 0.15199284 | 0.60437069 | 0.54559722 | NA         |
| ERCC-00130   | 0.15698929 | 0.09186002 | 0.15199284 | 0.60437069 | 0.54559722 | NA         |
| Mir224       | 0.15698929 | 0.09186002 | 0.15199284 | 0.60437069 | 0.54559722 | NA         |
| Krt26        | 0.15698929 | 0.09186002 | 0.15199284 | 0.60437069 | 0.54559722 | NA         |
| Mn1          | 216.232587 | 0.09177996 | 0.42223477 | 0.21736714 | 0.82792224 | 0.93249937 |
| Pkp3         | 480.817462 | 0.09177867 | 0.27578528 | 0.33279032 | 0.73929257 | 0.89510578 |
| Gm14322      | 665.182746 | 0.09177705 | 0.20862711 | 0.43990951 | 0.66000265 | 0.8548098  |
| Slc25a22     | 1198.06364 | 0.09164948 | 0.20650678 | 0.44380858 | 0.65718098 | 0.85293118 |
| Mir6905      | 1.38265958 | 0.09164678 | 0.25752591 | 0.35587403 | 0.7219349  | NA         |
| Mir296       | 2.29062611 | 0.09159118 | 0.28713507 | 0.3189829  | 0.74973948 | NA         |
| Zfp36l1      | 3444.6364  | 0.09148047 | 0.28810501 | 0.31752473 | 0.75084548 | 0.90104712 |
| Arf6         | 12084.8632 | 0.09144198 | 0.14762157 | 0.61943511 | 0.53562976 | 0.7803571  |
| D8Ertd738e   | 4140.82284 | 0.09142621 | 0.24540056 | 0.37255907 | 0.70947664 | 0.8816794  |
| Orai3        | 1378.38727 | 0.09137771 | 0.19519518 | 0.46813505 | 0.63968802 | 0.84238903 |
| Mrpl46       | 2825.53179 | 0.09137739 | 0.18516478 | 0.49349229 | 0.62166479 | 0.83196874 |
| D630003M21   | 152.068282 | 0.09134448 | 0.3618351  | 0.25244782 | 0.80069494 | 0.92295657 |
| Rcan1        | 2712.47958 | 0.09124193 | 0.24392638 | 0.37405521 | 0.70836324 | 0.88125982 |
| 4933434I20R  | 17.3993725 | 0.09123222 | 0.39876189 | 0.22878871 | 0.81903314 | 0.93036217 |
| Nkain2       | 0.77185627 | 0.09120632 | 0.19308809 | 0.47235601 | 0.63667269 | NA         |

|             |            |            |            |            |            |            |
|-------------|------------|------------|------------|------------|------------|------------|
| Dap         | 608.063989 | 0.09112675 | 0.36676423 | 0.24846139 | 0.80377744 | 0.9238391  |
| Rmnd5a      | 10911.6733 | 0.09111535 | 0.19218191 | 0.47410993 | 0.63542152 | 0.83955765 |
| Eif1ad      | 4768.16258 | 0.09108734 | 0.17014731 | 0.53534401 | 0.592412   | 0.81685504 |
| 3110082J24R | 1.12318062 | 0.09099338 | 0.2388596  | 0.38094922 | 0.70324093 | NA         |
| Fip1l1      | 6079.26551 | 0.09099091 | 0.1772932  | 0.51322278 | 0.60779549 | 0.82527091 |
| 2900009J06R | 33.5381712 | 0.09094982 | 0.38527044 | 0.23606748 | 0.81338031 | 0.92878688 |
| Rbm11       | 6.18319371 | 0.09083197 | 0.40634183 | 0.22353586 | 0.82311848 | 0.93107393 |
| Cpn2        | 10.51776   | 0.0908196  | 0.42557676 | 0.21340356 | 0.8310122  | 0.93388284 |
| Tmx4        | 778.501637 | 0.09073828 | 0.28801099 | 0.31505144 | 0.7527226  | 0.90191816 |
| 9230116N13I | 40.1926231 | 0.09072015 | 0.37398567 | 0.24257653 | 0.80833346 | 0.92667849 |
| Ubxn1       | 15797.6881 | 0.0906744  | 0.2058251  | 0.44054102 | 0.65954531 | 0.854457   |
| Synrg       | 2314.74764 | 0.09066791 | 0.21275002 | 0.42617111 | 0.66998316 | 0.86078224 |
| Btbd19      | 2112.79975 | 0.09065967 | 0.208574   | 0.43466429 | 0.66380612 | 0.85688129 |
| 3110043O21I | 2204.43875 | 0.09064554 | 0.22207905 | 0.40816791 | 0.6831504  | 0.86824483 |
| Der1l       | 3402.98377 | 0.09059418 | 0.15135812 | 0.5985419  | 0.54947841 | 0.78995459 |
| Ddx20       | 6867.31318 | 0.09058424 | 0.18451995 | 0.4909184  | 0.62348416 | 0.83265488 |
| Tm9sf1      | 2664.03401 | 0.09055122 | 0.18082724 | 0.50076094 | 0.61653938 | 0.83032065 |
| Zdhhc8      | 1414.90066 | 0.09049195 | 0.21766725 | 0.41573527 | 0.67760373 | 0.86555439 |
| Lars2       | 22971.4923 | 0.09044051 | 0.23674654 | 0.38201409 | 0.70245091 | 0.87879687 |
| Coa3        | 2334.59127 | 0.09037172 | 0.19912529 | 0.45384353 | 0.64994145 | 0.84900546 |
| Mirlet7i    | 1.27037316 | 0.09029182 | 0.22030539 | 0.40984844 | 0.68191713 | NA         |
| Pdlim5      | 4499.80267 | 0.0902594  | 0.25448032 | 0.35468124 | 0.7228284  | 0.88761091 |
| Gtf3c6      | 2737.7482  | 0.09024537 | 0.18973202 | 0.47564651 | 0.63432624 | 0.83928202 |
| Ttc33       | 1909.56889 | 0.09020757 | 0.15395156 | 0.58594774 | 0.55791063 | 0.79640795 |
| Ercc5       | 3495.12469 | 0.09018075 | 0.18052402 | 0.49954988 | 0.61739205 | 0.83032065 |
| Cd36        | 4.82886835 | 0.0901588  | 0.39684056 | 0.22719151 | 0.82027483 | NA         |
| Cisd1       | 5683.49253 | 0.09015524 | 0.21989023 | 0.41000111 | 0.68180513 | 0.86734737 |
| 2210408I21R | 335.750891 | 0.09015187 | 0.22658876 | 0.39786556 | 0.69072929 | 0.87364263 |
| Mir7-2      | 0.14443946 | 0.08995891 | 0.15056924 | 0.59745875 | 0.55020114 | NA         |
| Mir7213     | 0.14443946 | 0.08995891 | 0.15056924 | 0.59745875 | 0.55020114 | NA         |
| Ccr9        | 0.14443946 | 0.08995891 | 0.15056924 | 0.59745875 | 0.55020114 | NA         |
| Cntn5       | 0.14443946 | 0.08995891 | 0.15056924 | 0.59745875 | 0.55020114 | NA         |
| Pcdha6      | 0.14443946 | 0.08995891 | 0.15056924 | 0.59745875 | 0.55020114 | NA         |
| Sbpl        | 0.14443946 | 0.08995891 | 0.15056924 | 0.59745875 | 0.55020114 | NA         |
| Olf5        | 0.14443946 | 0.08995891 | 0.15056924 | 0.59745875 | 0.55020114 | NA         |
| Nxph1       | 0.14443946 | 0.08995891 | 0.15056924 | 0.59745875 | 0.55020114 | NA         |
| Gm6568      | 0.14443946 | 0.08995891 | 0.15056924 | 0.59745875 | 0.55020114 | NA         |
| Mptx1       | 0.14443946 | 0.08995891 | 0.15056924 | 0.59745875 | 0.55020114 | NA         |
| E030002O03I | 0.14443946 | 0.08995891 | 0.15056924 | 0.59745875 | 0.55020114 | NA         |
| 4933430M04  | 0.14443946 | 0.08995891 | 0.15056924 | 0.59745875 | 0.55020114 | NA         |
| Hoxb6       | 0.14443946 | 0.08995891 | 0.15056924 | 0.59745875 | 0.55020114 | NA         |

|             |            |            |            |            |            |    |
|-------------|------------|------------|------------|------------|------------|----|
| Gm5148      | 0.14443946 | 0.08995891 | 0.15056924 | 0.59745875 | 0.55020114 | NA |
| Pcdh20      | 0.14443946 | 0.08995891 | 0.15056924 | 0.59745875 | 0.55020114 | NA |
| B930025P03f | 0.14443946 | 0.08995891 | 0.15056924 | 0.59745875 | 0.55020114 | NA |
| Stmn4       | 0.14443946 | 0.08995891 | 0.15056924 | 0.59745875 | 0.55020114 | NA |
| Six6        | 0.14443946 | 0.08995891 | 0.15056924 | 0.59745875 | 0.55020114 | NA |
| Gm10389     | 0.14443946 | 0.08995891 | 0.15056924 | 0.59745875 | 0.55020114 | NA |
| Gm1993      | 0.14443946 | 0.08995891 | 0.15056924 | 0.59745875 | 0.55020114 | NA |
| Olf980      | 0.14443946 | 0.08995891 | 0.15056924 | 0.59745875 | 0.55020114 | NA |
| Mir136      | 0.14443946 | 0.08995891 | 0.15056924 | 0.59745875 | 0.55020114 | NA |
| Rn4.5s      | 0.14443946 | 0.08995891 | 0.15056924 | 0.59745875 | 0.55020114 | NA |
| Gabra2      | 0.14443946 | 0.08995891 | 0.15056924 | 0.59745875 | 0.55020114 | NA |
| S100b       | 0.14443946 | 0.08995891 | 0.15056924 | 0.59745875 | 0.55020114 | NA |
| Krtap14     | 0.14443946 | 0.08995891 | 0.15056924 | 0.59745875 | 0.55020114 | NA |
| Bsx         | 0.14443946 | 0.08995891 | 0.15056924 | 0.59745875 | 0.55020114 | NA |
| Clca6       | 0.14443946 | 0.08995891 | 0.15056924 | 0.59745875 | 0.55020114 | NA |
| Rnf148      | 0.14443946 | 0.08995891 | 0.15056924 | 0.59745875 | 0.55020114 | NA |
| Dlx6as2     | 0.14443946 | 0.08995891 | 0.15056924 | 0.59745875 | 0.55020114 | NA |
| Snord90     | 0.14443946 | 0.08995891 | 0.15056924 | 0.59745875 | 0.55020114 | NA |
| Olf9564     | 0.14443946 | 0.08995891 | 0.15056924 | 0.59745875 | 0.55020114 | NA |
| Rhox12      | 0.14443946 | 0.08995891 | 0.15056924 | 0.59745875 | 0.55020114 | NA |
| 6330407A03f | 0.14443946 | 0.08995891 | 0.15056924 | 0.59745875 | 0.55020114 | NA |
| Lrit1       | 0.14443946 | 0.08995891 | 0.15056924 | 0.59745875 | 0.55020114 | NA |
| Gm19466     | 0.14443946 | 0.08995891 | 0.15056924 | 0.59745875 | 0.55020114 | NA |
| Gm15880     | 0.14443946 | 0.08995891 | 0.15056924 | 0.59745875 | 0.55020114 | NA |
| Acvr1c      | 0.14443946 | 0.08995891 | 0.15056924 | 0.59745875 | 0.55020114 | NA |
| Lyzl4os     | 0.14443946 | 0.08995891 | 0.15056924 | 0.59745875 | 0.55020114 | NA |
| Ms4a8a      | 0.14443946 | 0.08995891 | 0.15056924 | 0.59745875 | 0.55020114 | NA |
| Sult2a7     | 0.14443946 | 0.08995891 | 0.15056924 | 0.59745875 | 0.55020114 | NA |
| Olf91195    | 0.14443946 | 0.08995891 | 0.15056924 | 0.59745875 | 0.55020114 | NA |
| Tgm7        | 0.14443946 | 0.08995891 | 0.15056924 | 0.59745875 | 0.55020114 | NA |
| Vmn2r26     | 0.14443946 | 0.08995891 | 0.15056924 | 0.59745875 | 0.55020114 | NA |
| Gm13003     | 0.14443946 | 0.08995891 | 0.15056924 | 0.59745875 | 0.55020114 | NA |
| Scgb2b3     | 0.14443946 | 0.08995891 | 0.15056924 | 0.59745875 | 0.55020114 | NA |
| Defb13      | 0.14443946 | 0.08995891 | 0.15056924 | 0.59745875 | 0.55020114 | NA |
| Gm10865     | 0.14443946 | 0.08995891 | 0.15056924 | 0.59745875 | 0.55020114 | NA |
| Mir431      | 0.14443946 | 0.08995891 | 0.15056924 | 0.59745875 | 0.55020114 | NA |
| Mir6902     | 0.14443946 | 0.08995891 | 0.15056924 | 0.59745875 | 0.55020114 | NA |
| Olf9328     | 0.14443946 | 0.08995891 | 0.15056924 | 0.59745875 | 0.55020114 | NA |
| Tbc1d21     | 0.14443946 | 0.08995891 | 0.15056924 | 0.59745875 | 0.55020114 | NA |
| Trim55      | 0.14443946 | 0.08995891 | 0.15056924 | 0.59745875 | 0.55020114 | NA |
| 4930567H12l | 0.14443946 | 0.08995891 | 0.15056924 | 0.59745875 | 0.55020114 | NA |

|             |            |            |            |            |            |    |
|-------------|------------|------------|------------|------------|------------|----|
| D630010B17I | 0.14443946 | 0.08995891 | 0.15056924 | 0.59745875 | 0.55020114 | NA |
| Abca15      | 0.14443946 | 0.08995891 | 0.15056924 | 0.59745875 | 0.55020114 | NA |
| Ttc39d      | 0.14443946 | 0.08995891 | 0.15056924 | 0.59745875 | 0.55020114 | NA |
| 4930448I18R | 0.14443946 | 0.08995891 | 0.15056924 | 0.59745875 | 0.55020114 | NA |
| Acss2os     | 0.14443946 | 0.08995891 | 0.15056924 | 0.59745875 | 0.55020114 | NA |
| Nr1h5       | 0.14443946 | 0.08995891 | 0.15056924 | 0.59745875 | 0.55020114 | NA |
| AA387883    | 0.14443946 | 0.08995891 | 0.15056924 | 0.59745875 | 0.55020114 | NA |
| 2310005E17F | 0.14443946 | 0.08995891 | 0.15056924 | 0.59745875 | 0.55020114 | NA |
| Gm8884      | 0.14443946 | 0.08995891 | 0.15056924 | 0.59745875 | 0.55020114 | NA |
| Gm12633     | 0.14443946 | 0.08995891 | 0.15056924 | 0.59745875 | 0.55020114 | NA |
| Cyp7a1      | 0.14443946 | 0.08995891 | 0.15056924 | 0.59745875 | 0.55020114 | NA |
| 4933417E11F | 0.14443946 | 0.08995891 | 0.15056924 | 0.59745875 | 0.55020114 | NA |
| 1700120K04F | 0.14443946 | 0.08995891 | 0.15056924 | 0.59745875 | 0.55020114 | NA |
| Gm5166      | 0.14443946 | 0.08995891 | 0.15056924 | 0.59745875 | 0.55020114 | NA |
| Pcdhb10     | 0.14443946 | 0.08995891 | 0.15056924 | 0.59745875 | 0.55020114 | NA |
| Msx1os      | 0.14443946 | 0.08995891 | 0.15056924 | 0.59745875 | 0.55020114 | NA |
| Hmgb4       | 0.14443946 | 0.08995891 | 0.15056924 | 0.59745875 | 0.55020114 | NA |
| Trem1       | 0.14443946 | 0.08995891 | 0.15056924 | 0.59745875 | 0.55020114 | NA |
| Mir103-2    | 0.14443946 | 0.08995891 | 0.15056924 | 0.59745875 | 0.55020114 | NA |
| Smpx        | 0.14443946 | 0.08995891 | 0.15056924 | 0.59745875 | 0.55020114 | NA |
| Gm6878      | 0.14443946 | 0.08995891 | 0.15056924 | 0.59745875 | 0.55020114 | NA |
| Ankub1      | 0.14443946 | 0.08995891 | 0.15056924 | 0.59745875 | 0.55020114 | NA |
| Rbp3        | 0.14443946 | 0.08995891 | 0.15056924 | 0.59745875 | 0.55020114 | NA |
| C030034L19F | 0.14443946 | 0.08995891 | 0.15056924 | 0.59745875 | 0.55020114 | NA |
| Vmn2r39     | 0.14443946 | 0.08995891 | 0.15056924 | 0.59745875 | 0.55020114 | NA |
| Slco1a4     | 0.14443946 | 0.08995891 | 0.15056924 | 0.59745875 | 0.55020114 | NA |
| Mir6960     | 0.14443946 | 0.08995891 | 0.15056924 | 0.59745875 | 0.55020114 | NA |
| Mir219-2    | 0.14443946 | 0.08995891 | 0.15056924 | 0.59745875 | 0.55020114 | NA |
| Pvalb       | 0.14443946 | 0.08995891 | 0.15056924 | 0.59745875 | 0.55020114 | NA |
| Mir154      | 0.14443946 | 0.08995891 | 0.15056924 | 0.59745875 | 0.55020114 | NA |
| Mir6357     | 0.14443946 | 0.08995891 | 0.15056924 | 0.59745875 | 0.55020114 | NA |
| Ifne        | 0.14443946 | 0.08995891 | 0.15056924 | 0.59745875 | 0.55020114 | NA |
| H2-M10.6    | 0.14443946 | 0.08995891 | 0.15056924 | 0.59745875 | 0.55020114 | NA |
| Pth2        | 0.14443946 | 0.08995891 | 0.15056924 | 0.59745875 | 0.55020114 | NA |
| Wdr38       | 0.14443946 | 0.08995891 | 0.15056924 | 0.59745875 | 0.55020114 | NA |
| Adora3      | 0.14443946 | 0.08995891 | 0.15056924 | 0.59745875 | 0.55020114 | NA |
| 4930563E18F | 0.14443946 | 0.08995891 | 0.15056924 | 0.59745875 | 0.55020114 | NA |
| Ccdc183     | 0.14443946 | 0.08995891 | 0.15056924 | 0.59745875 | 0.55020114 | NA |
| Wap         | 0.14443946 | 0.08995891 | 0.15056924 | 0.59745875 | 0.55020114 | NA |
| Hoxb5       | 0.14443946 | 0.08995891 | 0.15056924 | 0.59745875 | 0.55020114 | NA |
| 4933425B07F | 0.14443946 | 0.08995891 | 0.15056924 | 0.59745875 | 0.55020114 | NA |

|             |            |            |            |            |            |    |
|-------------|------------|------------|------------|------------|------------|----|
| Mir3081     | 0.14443946 | 0.08995891 | 0.15056924 | 0.59745875 | 0.55020114 | NA |
| Klra17      | 0.14443946 | 0.08995891 | 0.15056924 | 0.59745875 | 0.55020114 | NA |
| Lao1        | 0.14443946 | 0.08995891 | 0.15056924 | 0.59745875 | 0.55020114 | NA |
| Mir669i     | 0.14443946 | 0.08995891 | 0.15056924 | 0.59745875 | 0.55020114 | NA |
| Gm5476      | 0.14443946 | 0.08995891 | 0.15056924 | 0.59745875 | 0.55020114 | NA |
| Mir6987     | 0.14443946 | 0.08995891 | 0.15056924 | 0.59745875 | 0.55020114 | NA |
| Trpc5       | 0.14443946 | 0.08995891 | 0.15056924 | 0.59745875 | 0.55020114 | NA |
| Gm9767      | 0.14443946 | 0.08995891 | 0.15056924 | 0.59745875 | 0.55020114 | NA |
| Mir3102     | 0.14443946 | 0.08995891 | 0.15056924 | 0.59745875 | 0.55020114 | NA |
| Syt10       | 0.14443946 | 0.08995891 | 0.15056924 | 0.59745875 | 0.55020114 | NA |
| ERCC-00096  | 0.14443946 | 0.08995891 | 0.15056924 | 0.59745875 | 0.55020114 | NA |
| Azgp1       | 0.14443946 | 0.08995891 | 0.15056924 | 0.59745875 | 0.55020114 | NA |
| 1700012P22F | 0.14443946 | 0.08995891 | 0.15056924 | 0.59745875 | 0.55020114 | NA |
| Gcnt7       | 0.14443946 | 0.08995891 | 0.15056924 | 0.59745875 | 0.55020114 | NA |
| LOC10105576 | 0.14443946 | 0.08995891 | 0.15056924 | 0.59745875 | 0.55020114 | NA |
| Olf1325     | 0.14443946 | 0.08995891 | 0.15056924 | 0.59745875 | 0.55020114 | NA |
| 4933432K03F | 0.14443946 | 0.08995891 | 0.15056924 | 0.59745875 | 0.55020114 | NA |
| Slc22a29    | 0.14443946 | 0.08995891 | 0.15056924 | 0.59745875 | 0.55020114 | NA |
| Pthlh       | 0.14443946 | 0.08995891 | 0.15056924 | 0.59745875 | 0.55020114 | NA |
| Mir5620     | 0.14443946 | 0.08995891 | 0.15056924 | 0.59745875 | 0.55020114 | NA |
| Gm20125     | 0.14443946 | 0.08995891 | 0.15056924 | 0.59745875 | 0.55020114 | NA |
| Mir7038     | 0.14443946 | 0.08995891 | 0.15056924 | 0.59745875 | 0.55020114 | NA |
| Pcdha5      | 0.14443946 | 0.08995891 | 0.15056924 | 0.59745875 | 0.55020114 | NA |
| 1700017G19I | 0.14443946 | 0.08995891 | 0.15056924 | 0.59745875 | 0.55020114 | NA |
| Klkb1       | 0.14443946 | 0.08995891 | 0.15056924 | 0.59745875 | 0.55020114 | NA |
| Vmn2r108    | 0.14443946 | 0.08995891 | 0.15056924 | 0.59745875 | 0.55020114 | NA |
| Gm20063     | 0.14443946 | 0.08995891 | 0.15056924 | 0.59745875 | 0.55020114 | NA |
| Prm3        | 0.14443946 | 0.08995891 | 0.15056924 | 0.59745875 | 0.55020114 | NA |
| Mbl1        | 0.14443946 | 0.08995891 | 0.15056924 | 0.59745875 | 0.55020114 | NA |
| A130077B15I | 0.14443946 | 0.08995891 | 0.15056924 | 0.59745875 | 0.55020114 | NA |
| Plcz1       | 0.14443946 | 0.08995891 | 0.15056924 | 0.59745875 | 0.55020114 | NA |
| Olf1975     | 0.14443946 | 0.08995891 | 0.15056924 | 0.59745875 | 0.55020114 | NA |
| Olf157      | 0.14443946 | 0.08995891 | 0.15056924 | 0.59745875 | 0.55020114 | NA |
| Psap1       | 0.14443946 | 0.08995891 | 0.15056924 | 0.59745875 | 0.55020114 | NA |
| Lmod2       | 0.14443946 | 0.08995891 | 0.15056924 | 0.59745875 | 0.55020114 | NA |
| Gm7854      | 0.14443946 | 0.08995891 | 0.15056924 | 0.59745875 | 0.55020114 | NA |
| Scg2        | 0.14443946 | 0.08995891 | 0.15056924 | 0.59745875 | 0.55020114 | NA |
| 4930522H14I | 0.14443946 | 0.08995891 | 0.15056924 | 0.59745875 | 0.55020114 | NA |
| Uchl1os     | 0.14443946 | 0.08995891 | 0.15056924 | 0.59745875 | 0.55020114 | NA |
| Lrrc4c      | 0.14443946 | 0.08995891 | 0.15056924 | 0.59745875 | 0.55020114 | NA |
| Cdh7        | 0.14443946 | 0.08995891 | 0.15056924 | 0.59745875 | 0.55020114 | NA |

|             |            |            |            |            |            |            |
|-------------|------------|------------|------------|------------|------------|------------|
| Chil4       | 0.14443946 | 0.08995891 | 0.15056924 | 0.59745875 | 0.55020114 | NA         |
| 1810008I18R | 0.14443946 | 0.08995891 | 0.15056924 | 0.59745875 | 0.55020114 | NA         |
| 1700013D24I | 0.14443946 | 0.08995891 | 0.15056924 | 0.59745875 | 0.55020114 | NA         |
| Sh2d7       | 4.20019547 | 0.08993115 | 0.40216626 | 0.22361685 | 0.82305545 | NA         |
| Mta2        | 15390.1832 | 0.0899305  | 0.17838575 | 0.50413504 | 0.61416649 | 0.82892753 |
| 4930523C07F | 1.43160214 | 0.08991696 | 0.25761987 | 0.34902961 | 0.72706708 | NA         |
| Grm3        | 0.81903718 | 0.08982505 | 0.1959231  | 0.45847097 | 0.64661412 | NA         |
| Arhgap27os3 | 5.00373809 | 0.08976724 | 0.40555505 | 0.22134416 | 0.82482447 | NA         |
| Psemb5      | 3069.51564 | 0.0896819  | 0.28072853 | 0.31946129 | 0.74937674 | 0.90084943 |
| Rere        | 6258.79883 | 0.08965528 | 0.22291202 | 0.40220031 | 0.68753661 | 0.87088718 |
| Eif6        | 6367.52784 | 0.08962567 | 0.20787688 | 0.43114786 | 0.66636086 | 0.8585804  |
| Mrpl49      | 5785.75216 | 0.08960877 | 0.19268543 | 0.46505215 | 0.64189411 | 0.84385084 |
| Mir134      | 2.00015143 | 0.08960862 | 0.27330669 | 0.32786838 | 0.74301118 | NA         |
| Rps27       | 85.9513642 | 0.08955894 | 0.30342893 | 0.29515623 | 0.76787454 | 0.90649963 |
| Cirh1a      | 16146.6698 | 0.08953479 | 0.22208959 | 0.40314719 | 0.68683995 | 0.87068415 |
| Sox7        | 27.6999521 | 0.08945619 | 0.4293846  | 0.20833581 | 0.83496678 | 0.93631091 |
| Tstd2       | 2910.69562 | 0.0893439  | 0.17442494 | 0.51221977 | 0.60849721 | 0.82562526 |
| Gpank1      | 1103.70304 | 0.08930041 | 0.21250928 | 0.42021889 | 0.67432556 | 0.86375836 |
| Irx6        | 0.77009462 | 0.08928747 | 0.19126956 | 0.46681486 | 0.64063234 | NA         |
| Tbc1d10b    | 6157.95547 | 0.08928317 | 0.20460794 | 0.43636217 | 0.66257398 | 0.85619416 |
| Xkr9        | 19.3125441 | 0.08928051 | 0.4113307  | 0.21705288 | 0.82816713 | 0.93250504 |
| Cd300ld     | 38.4526151 | 0.08927124 | 0.43225675 | 0.20652365 | 0.8363819  | 0.93698697 |
| Mtfmt       | 1083.11012 | 0.08922298 | 0.17452419 | 0.51123559 | 0.6091861  | 0.82586113 |
| Krt2        | 0.82619293 | 0.08913232 | 0.19466529 | 0.45787476 | 0.64704242 | NA         |
| Ppp1r2-ps3  | 0.82619293 | 0.08913232 | 0.19466529 | 0.45787476 | 0.64704242 | NA         |
| Slc10a1     | 0.75754479 | 0.0890985  | 0.192031   | 0.46397977 | 0.64266224 | NA         |
| Numb        | 2325.88781 | 0.08903098 | 0.16674492 | 0.53393519 | 0.59338637 | 0.81712136 |
| Ddhd1       | 2452.5554  | 0.089026   | 0.21294204 | 0.4180762  | 0.67589141 | 0.864488   |
| Mansc4      | 98.2578504 | 0.08902265 | 0.37335396 | 0.23844035 | 0.81153957 | 0.92823271 |
| Actn2       | 116.469558 | 0.08896201 | 0.38705341 | 0.22984426 | 0.81821279 | 0.93032296 |
| Stag1       | 10243.4624 | 0.08878625 | 0.18695901 | 0.47489685 | 0.63486049 | 0.83934241 |
| Ihh         | 6.64235615 | 0.08878201 | 0.40581418 | 0.21877504 | 0.82682529 | 0.9318713  |
| Il2rg       | 284.78646  | 0.08876385 | 0.38556394 | 0.23021823 | 0.8179222  | 0.93032296 |
| Ufd1l       | 4326.25176 | 0.08860889 | 0.17236909 | 0.51406486 | 0.60720664 | 0.82475941 |
| Gpr68       | 58.7368037 | 0.08858653 | 0.38388479 | 0.23076333 | 0.81749867 | 0.93024054 |
| Ptpn21      | 1007.14644 | 0.08846796 | 0.22742572 | 0.38899717 | 0.69727824 | 0.87645821 |
| Cacnb4      | 37.2096691 | 0.08845463 | 0.4322716  | 0.20462745 | 0.83786321 | 0.93751696 |
| 1700003M07  | 188.867254 | 0.08843402 | 0.31637274 | 0.27952478 | 0.77984212 | 0.91295541 |
| Wsb2        | 2261.63811 | 0.08840153 | 0.17706505 | 0.49926018 | 0.6175961  | 0.83032065 |
| Rpgrip1l    | 889.760744 | 0.08839953 | 0.25400109 | 0.34802815 | 0.72781904 | 0.88986097 |
| Cyb5r1      | 5631.30981 | 0.08836688 | 0.19100561 | 0.46264021 | 0.64362228 | 0.84499536 |

|             |            |            |            |            |            |            |
|-------------|------------|------------|------------|------------|------------|------------|
| Zc3hav1l    | 3478.8586  | 0.08835854 | 0.24514694 | 0.36043092 | 0.71852491 | 0.88550762 |
| Snrnp35     | 860.71442  | 0.08832232 | 0.2055055  | 0.4297808  | 0.6673551  | 0.85916281 |
| Cyb5r3      | 10567.068  | 0.08829675 | 0.21350742 | 0.41355353 | 0.67920111 | 0.86604267 |
| Cmtm8       | 48.3437448 | 0.08817152 | 0.40697552 | 0.21665067 | 0.8284806  | 0.93256314 |
| Cetn2       | 3018.71948 | 0.08813823 | 0.21100609 | 0.41770467 | 0.67616305 | 0.864488   |
| Eml6        | 164.420083 | 0.08804781 | 0.2822813  | 0.31191515 | 0.75510501 | 0.90191816 |
| Depdc5      | 4508.37939 | 0.08790219 | 0.1790406  | 0.49096232 | 0.6234531  | 0.83265488 |
| Ereg        | 0.9974937  | 0.08788018 | 0.18226659 | 0.4821519  | 0.62969805 | NA         |
| Gm5168      | 0.9974937  | 0.08788018 | 0.18226659 | 0.4821519  | 0.62969805 | NA         |
| Ddb1        | 79374.3225 | 0.0878503  | 0.19689375 | 0.44618126 | 0.65546632 | 0.85234189 |
| Sec61a1     | 14154.2066 | 0.08784267 | 0.17678163 | 0.49689932 | 0.61926005 | 0.83094942 |
| Sh2b1       | 4316.00608 | 0.08775964 | 0.19600361 | 0.44774501 | 0.65433723 | 0.85187093 |
| Sele        | 0.96117463 | 0.08772085 | 0.25921499 | 0.33840965 | 0.7350545  | NA         |
| Cd164       | 20710.4773 | 0.08757833 | 0.2277876  | 0.38447364 | 0.70062743 | 0.87785127 |
| Slc38a11    | 1.53788722 | 0.08754374 | 0.23035964 | 0.38003074 | 0.7039226  | NA         |
| Slc35a1     | 2205.09619 | 0.08743254 | 0.15130643 | 0.57785079 | 0.56336486 | 0.79999829 |
| Tsen34      | 4434.35039 | 0.08729769 | 0.20410325 | 0.42771336 | 0.66885982 | 0.86004954 |
| Gch1        | 208.100123 | 0.08727619 | 0.37374255 | 0.23351955 | 0.81535799 | 0.92939072 |
| Madd        | 1201.57351 | 0.08723022 | 0.24429316 | 0.3570719  | 0.72103798 | 0.88656328 |
| Mir363      | 31.2318282 | 0.08722346 | 0.40167744 | 0.21714801 | 0.828093   | 0.93250504 |
| Ctrb1       | 0.81188144 | 0.08714431 | 0.1937147  | 0.44985906 | 0.65281207 | NA         |
| Tmprss4     | 3.12653617 | 0.08712337 | 0.30402278 | 0.28656856 | 0.77444269 | NA         |
| Vat1        | 13238.1228 | 0.08710649 | 0.15840887 | 0.54988393 | 0.58239899 | 0.81000763 |
| Wdr77       | 14196.4776 | 0.0870112  | 0.19110442 | 0.45530708 | 0.64888834 | 0.84862854 |
| Tmsb15b2    | 2.39410718 | 0.08696993 | 0.32209951 | 0.27000949 | 0.78715295 | NA         |
| Nr4a3       | 1.16635171 | 0.08693915 | 0.24638964 | 0.35285227 | 0.72419919 | NA         |
| Qpctl       | 731.562623 | 0.08689843 | 0.1957481  | 0.44392989 | 0.65709328 | 0.85288854 |
| Col13a1     | 165.731306 | 0.08687245 | 0.32972516 | 0.26346926 | 0.79218891 | 0.918989   |
| Awat2       | 58.7273365 | 0.0868124  | 0.37227326 | 0.23319536 | 0.81560971 | 0.92946992 |
| Meig1       | 1.13271205 | 0.0868033  | 0.24250808 | 0.35793982 | 0.72038835 | NA         |
| Rai2        | 0.62026107 | 0.08679309 | 0.20658811 | 0.42012623 | 0.67439324 | NA         |
| Pcdhb1      | 0.62026107 | 0.08679309 | 0.20658811 | 0.42012623 | 0.67439324 | NA         |
| Stk11ip     | 2124.11952 | 0.08678415 | 0.18644744 | 0.46546177 | 0.64160081 | 0.84362342 |
| Ldlrap1     | 1586.44932 | 0.08668747 | 0.16972792 | 0.51074376 | 0.6095305  | 0.82596491 |
| Scarna17    | 0.7521507  | 0.08666793 | 0.18995971 | 0.45624373 | 0.64821472 | NA         |
| Rbm19       | 3784.39566 | 0.08663339 | 0.24845652 | 0.34868632 | 0.72732482 | 0.88975993 |
| Smim11      | 667.265326 | 0.08660128 | 0.23904389 | 0.36228194 | 0.71714136 | 0.88488973 |
| Sec62       | 9505.04861 | 0.08658967 | 0.16298665 | 0.53126849 | 0.59523274 | 0.81814251 |
| 4732491K20F | 12.6788145 | 0.08650093 | 0.43141427 | 0.20050549 | 0.84108526 | 0.93940315 |
| Clpb        | 6805.39072 | 0.08646102 | 0.18427758 | 0.46918901 | 0.63893454 | 0.84211128 |
| Chp2        | 1.4859388  | 0.08639703 | 0.2543697  | 0.33965144 | 0.73411904 | NA         |



|             |            |            |            |            |            |            |
|-------------|------------|------------|------------|------------|------------|------------|
| Dag1        | 13746.0478 | 0.08637412 | 0.21546868 | 0.40086626 | 0.68851859 | 0.871705   |
| Nanos2      | 0.95401889 | 0.08625921 | 0.25887947 | 0.33320221 | 0.73898165 | NA         |
| Cab39l      | 3377.92432 | 0.08625354 | 0.2368775  | 0.3641272  | 0.71576303 | 0.88472721 |
| Lysmd1      | 54.9329031 | 0.08623621 | 0.34449143 | 0.25032904 | 0.8023329  | 0.92349342 |
| 2810025M15  | 4411.98483 | 0.08620861 | 0.2199375  | 0.39196867 | 0.69508136 | 0.8752397  |
| Wnt9b       | 0.79393753 | 0.08619484 | 0.1941922  | 0.44386354 | 0.65714124 | NA         |
| Ccdc67      | 0.79393753 | 0.08619484 | 0.1941922  | 0.44386354 | 0.65714124 | NA         |
| C6          | 0.79393753 | 0.08619484 | 0.1941922  | 0.44386354 | 0.65714124 | NA         |
| Kti12       | 1907.58018 | 0.08610376 | 0.20540463 | 0.41919093 | 0.6750766  | 0.86411361 |
| Clec2l      | 28.2642961 | 0.08607861 | 0.40072453 | 0.21480744 | 0.82991746 | 0.93346205 |
| Rab30       | 434.5068   | 0.08603328 | 0.32462845 | 0.26502075 | 0.79099347 | 0.91829081 |
| 4933434E20F | 2017.12432 | 0.08598946 | 0.16372544 | 0.52520528 | 0.59944049 | 0.8202282  |
| 9030624J02R | 7153.46028 | 0.08597156 | 0.17365917 | 0.49505916 | 0.62055836 | 0.83154492 |
| E430016F16F | 2.49361322 | 0.08597135 | 0.35595982 | 0.24151982 | 0.80915226 | NA         |
| Snord8      | 3.56704558 | 0.08587468 | 0.38046765 | 0.22570822 | 0.82142836 | NA         |
| Fasl        | 1.35735806 | 0.08585525 | 0.21953737 | 0.39107349 | 0.69574291 | NA         |
| Zfp523      | 800.239358 | 0.085826   | 0.23202088 | 0.36990637 | 0.71145225 | 0.88298435 |
| Rundc1      | 1119.43609 | 0.08575733 | 0.2131492  | 0.40233475 | 0.68743768 | 0.87088718 |
| Pisd-ps1    | 0.83836537 | 0.08569518 | 0.19683194 | 0.43537234 | 0.66329218 | NA         |
| Hs3st3a1    | 4.41110924 | 0.0856537  | 0.3892296  | 0.22005956 | 0.82582477 | NA         |
| Phf5a       | 5382.10389 | 0.08564121 | 0.20437797 | 0.41903347 | 0.67519167 | 0.86418977 |
| AU016765    | 0.74499496 | 0.08562492 | 0.18942699 | 0.4520207  | 0.65125407 | NA         |
| Alpk2       | 0.74499496 | 0.08562492 | 0.18942699 | 0.4520207  | 0.65125407 | NA         |
| Bach2       | 338.187321 | 0.08542205 | 0.33961379 | 0.25152703 | 0.80140667 | 0.92325551 |
| Vldlr       | 620.638873 | 0.08536904 | 0.33233859 | 0.25687368 | 0.79727629 | 0.92120095 |
| Moap1       | 2.48144078 | 0.08534426 | 0.34694093 | 0.24599074 | 0.8056894  | NA         |
| Wt1         | 27.166237  | 0.08533111 | 0.42600117 | 0.20030721 | 0.84124032 | 0.93940315 |
| Acbd6       | 2203.25875 | 0.08528806 | 0.17693749 | 0.48202368 | 0.62978913 | 0.83650508 |
| Csf2rb2     | 0.84552111 | 0.08505035 | 0.19554661 | 0.43493645 | 0.66360856 | NA         |
| Klk1b11     | 0.84552111 | 0.08505035 | 0.19554661 | 0.43493645 | 0.66360856 | NA         |
| Gm21269     | 0.84552111 | 0.08505035 | 0.19554661 | 0.43493645 | 0.66360856 | NA         |
| F2          | 224.314566 | 0.08498414 | 0.29420568 | 0.2888596  | 0.77268882 | 0.90962818 |
| Stub1       | 4706.03431 | 0.0848028  | 0.1981988  | 0.42786737 | 0.66874769 | 0.8600411  |
| Hhatl       | 1.12016222 | 0.08478925 | 0.24197559 | 0.35040413 | 0.72603542 | NA         |
| 5730422E09F | 4.07596716 | 0.0847513  | 0.36427449 | 0.23265779 | 0.81602715 | NA         |
| Rbm45       | 3328.49803 | 0.08471651 | 0.17437365 | 0.48583322 | 0.62708542 | 0.83498616 |
| Chpf        | 1646.64427 | 0.0846085  | 0.25938525 | 0.32618855 | 0.7442817  | 0.89800021 |
| Ikbkb       | 2197.64    | 0.0845373  | 0.17313574 | 0.48827179 | 0.62535734 | 0.8340422  |
| Nudt15      | 72.6294834 | 0.08447731 | 0.33759563 | 0.25023224 | 0.80240776 | 0.92349342 |
| Fkbpl       | 506.401391 | 0.08441825 | 0.20477153 | 0.41225577 | 0.68015196 | 0.86644421 |
| Cldn11      | 0.79217587 | 0.08435626 | 0.19237007 | 0.4385103  | 0.66101641 | NA         |

|             |            |            |            |            |            |            |
|-------------|------------|------------|------------|------------|------------|------------|
| Mir7014     | 0.79217587 | 0.08435626 | 0.19237007 | 0.4385103  | 0.66101641 | NA         |
| Hnrnpa1     | 2678.10206 | 0.08423184 | 0.20833157 | 0.40431623 | 0.68598019 | 0.87019153 |
| Csgalnact1  | 29.7340607 | 0.08418455 | 0.42791445 | 0.1967322  | 0.84403711 | 0.94103803 |
| Spata6      | 1862.61578 | 0.08417239 | 0.21356512 | 0.39412986 | 0.69348516 | 0.87485907 |
| Zfp750      | 361.161971 | 0.08414836 | 0.34930276 | 0.24090379 | 0.80962969 | 0.92748171 |
| Neurod4     | 4.90017974 | 0.08413304 | 0.34922258 | 0.24091524 | 0.80962081 | NA         |
| Dpysl3      | 3367.30716 | 0.08403235 | 0.34696386 | 0.24219339 | 0.80863032 | 0.92681383 |
| Atp11c      | 2962.5489  | 0.08402917 | 0.25265262 | 0.33258776 | 0.73944548 | 0.89515154 |
| Tacr2       | 19.6508136 | 0.08391787 | 0.43034842 | 0.19499984 | 0.84539308 | 0.94147896 |
| Sfr1        | 13823.257  | 0.08385423 | 0.16954893 | 0.49457249 | 0.62090193 | 0.83171324 |
| Hist2h2ac   | 1.23987941 | 0.08381691 | 0.21573919 | 0.38851036 | 0.69763839 | NA         |
| Zfp583      | 458.231363 | 0.08375826 | 0.20521296 | 0.40815286 | 0.68316145 | 0.86824483 |
| Kcnj4       | 152.79765  | 0.08359018 | 0.36561223 | 0.2286307  | 0.81915596 | 0.93036217 |
| Nenf        | 297.467859 | 0.08355415 | 0.30000199 | 0.27851199 | 0.78061936 | 0.91308099 |
| Slc39a6     | 2419.87459 | 0.08341802 | 0.18619099 | 0.44802397 | 0.6541359  | 0.85168012 |
| Tubgcp4     | 5256.75113 | 0.08331503 | 0.17352345 | 0.480137   | 0.63112998 | 0.83743194 |
| Psg19       | 0.83297128 | 0.08330749 | 0.1947394  | 0.4277896  | 0.66880431 | NA         |
| Gm1653      | 0.83297128 | 0.08330749 | 0.1947394  | 0.4277896  | 0.66880431 | NA         |
| BC107364    | 8.98794672 | 0.08329067 | 0.38634331 | 0.21558718 | 0.82930955 | 0.93304824 |
| Asah1       | 22879.8781 | 0.08323144 | 0.18682167 | 0.44551275 | 0.65594925 | 0.85268467 |
| Arhgap44    | 1970.50492 | 0.08320899 | 0.23308182 | 0.35699479 | 0.72109571 | 0.88656328 |
| Mark4       | 1711.30391 | 0.08319337 | 0.2407137  | 0.34561128 | 0.72963487 | 0.89041449 |
| Cbfa2t3     | 21.3341119 | 0.08319155 | 0.42941329 | 0.19373306 | 0.8463849  | 0.94147896 |
| Lrrc41      | 2335.64856 | 0.08310711 | 0.18912315 | 0.43943381 | 0.66034724 | 0.85504245 |
| AU015791    | 0.83120963 | 0.08307836 | 0.19462479 | 0.42686423 | 0.66947822 | NA         |
| Mir8102     | 0.83120963 | 0.08307836 | 0.19462479 | 0.42686423 | 0.66947822 | NA         |
| D6Ertd527e  | 8.94754667 | 0.08304152 | 0.43102492 | 0.1926606  | 0.84722478 | 0.94147896 |
| Akip1       | 1422.67896 | 0.08302659 | 0.21020882 | 0.39497196 | 0.69286358 | 0.87461511 |
| Tyms-ps     | 5.57539558 | 0.08283177 | 0.40959437 | 0.20222878 | 0.83973788 | NA         |
| Chd4        | 33095.7336 | 0.08273342 | 0.23226489 | 0.35620286 | 0.72168865 | 0.8869273  |
| Fam86       | 2522.75298 | 0.0827326  | 0.24488887 | 0.33783733 | 0.73548578 | 0.89343006 |
| Ptar1       | 271.357282 | 0.08266559 | 0.37109806 | 0.22275942 | 0.82372276 | 0.93107393 |
| Morf4l1     | 16718.9147 | 0.08263695 | 0.15177452 | 0.54447184 | 0.58611682 | 0.8126129  |
| Glp1r       | 38.6089973 | 0.08262356 | 0.39145569 | 0.21106746 | 0.83283463 | 0.93498494 |
| Defb1       | 0.98050281 | 0.08261966 | 0.2599647  | 0.31781109 | 0.75062824 | NA         |
| Cox7b       | 16844.4409 | 0.08258429 | 0.19507663 | 0.42334283 | 0.67204515 | 0.86222046 |
| 1700057G04I | 1.45731583 | 0.08252063 | 0.25361636 | 0.32537582 | 0.74489665 | NA         |
| Dbnl        | 5336.64543 | 0.08243046 | 0.2186703  | 0.37696228 | 0.70620164 | 0.88047315 |
| Ifnar2      | 1026.91396 | 0.08240544 | 0.22666041 | 0.36356346 | 0.71618402 | 0.88475132 |
| Gprin3      | 25.4787912 | 0.08220006 | 0.42605609 | 0.19293248 | 0.84701185 | 0.94147896 |
| Slc18a2     | 0.89896585 | 0.08217108 | 0.18153371 | 0.45264916 | 0.65080139 | NA         |

|             |            |            |            |            |            |            |
|-------------|------------|------------|------------|------------|------------|------------|
| Prpf31      | 7967.78785 | 0.08212326 | 0.21478118 | 0.38235778 | 0.702196   | 0.87871973 |
| Nr2e1       | 3.71710968 | 0.08210814 | 0.34875719 | 0.23543067 | 0.81387449 | NA         |
| Mir8105     | 0.81326571 | 0.0820948  | 0.19515403 | 0.42066667 | 0.67399851 | NA         |
| 2010005H15I | 0.98104318 | 0.08206568 | 0.18216389 | 0.45050464 | 0.65234661 | NA         |
| Dtd2        | 1449.94306 | 0.08205155 | 0.20412421 | 0.40196876 | 0.68770702 | 0.87089586 |
| Clta        | 14396.1033 | 0.08189034 | 0.19632222 | 0.41712212 | 0.67658908 | 0.8645552  |
| Jmjd7       | 52.5781524 | 0.08188677 | 0.35181987 | 0.23275197 | 0.81595401 | 0.92967334 |
| 1700023E05F | 0.77423196 | 0.08176358 | 0.19110805 | 0.42783953 | 0.66876795 | NA         |
| Cxcr1       | 0.77423196 | 0.08176358 | 0.19110805 | 0.42783953 | 0.66876795 | NA         |
| Snora74a    | 43.7064003 | 0.08169241 | 0.37373136 | 0.21858592 | 0.82697262 | 0.93192387 |
| Ndst3       | 0.81126741 | 0.08168957 | 0.18059052 | 0.45234692 | 0.65101908 | NA         |
| Cdkl4       | 331.910103 | 0.08168069 | 0.30846278 | 0.26479917 | 0.79116418 | 0.91829081 |
| AU019823    | 3309.91307 | 0.08161046 | 0.16619277 | 0.49105901 | 0.62338471 | 0.83265488 |
| Rfx7        | 7048.10806 | 0.08160878 | 0.24124526 | 0.3382814  | 0.73515114 | 0.89329078 |
| Gpcpd1      | 2060.34339 | 0.08158863 | 0.23991723 | 0.3400699  | 0.73380389 | 0.892514   |
| Mir25       | 101.822811 | 0.0815654  | 0.29605876 | 0.27550411 | 0.78292897 | 0.91399508 |
| Tubg1       | 3655.82761 | 0.081537   | 0.21512673 | 0.37901846 | 0.70467416 | 0.87942876 |
| Adipoq      | 2.61356706 | 0.08148765 | 0.32630228 | 0.24973056 | 0.80279572 | NA         |
| Fryl        | 5911.49916 | 0.08145157 | 0.27248625 | 0.29891994 | 0.76500113 | 0.90610594 |
| Sdhd        | 14564.9526 | 0.08145028 | 0.19726769 | 0.41289213 | 0.67968564 | 0.86637062 |
| Rspry1      | 3133.58915 | 0.08143858 | 0.22440071 | 0.36291586 | 0.71666774 | 0.88475711 |
| Rpl34       | 73.267467  | 0.08141021 | 0.32293014 | 0.2520985  | 0.80096493 | 0.92319935 |
| Slain2      | 3832.84013 | 0.08136625 | 0.19650595 | 0.41406505 | 0.67882646 | 0.86604267 |
| Rps21       | 39842.7468 | 0.0812646  | 0.2229267  | 0.36453508 | 0.71545848 | 0.88472721 |
| C2cd2       | 1274.98118 | 0.08124927 | 0.28073239 | 0.28941894 | 0.7722608  | 0.90946064 |
| Slc12a7     | 12600.7124 | 0.08119139 | 0.18087192 | 0.44888887 | 0.65351183 | 0.85122392 |
| A330074K22f | 1.11476813 | 0.08116331 | 0.23821774 | 0.34071061 | 0.73332145 | NA         |
| Prr33       | 0.97334707 | 0.08116256 | 0.25964004 | 0.31259646 | 0.75458727 | NA         |
| Fxyd2       | 220.328965 | 0.0810961  | 0.42876289 | 0.18913973 | 0.8499833  | 0.94277489 |
| Ncoa3       | 14354.6964 | 0.08109123 | 0.2060841  | 0.39348613 | 0.69396047 | 0.87496374 |
| Lrrfip2     | 2783.25851 | 0.08107286 | 0.18333327 | 0.44221575 | 0.65833309 | 0.85371396 |
| Gm5712      | 18.0862979 | 0.08101787 | 0.42752053 | 0.18950638 | 0.84969595 | 0.94277489 |
| Gpc2        | 887.64236  | 0.0809009  | 0.23450531 | 0.34498539 | 0.73010536 | 0.89067944 |
| Commd7      | 900.759517 | 0.08089946 | 0.22745459 | 0.355673   | 0.72208547 | 0.8872265  |
| Mocs1       | 719.261666 | 0.08086804 | 0.22091551 | 0.36605866 | 0.7143213  | 0.88425449 |
| Arglu1      | 7734.22141 | 0.08086794 | 0.18004449 | 0.44915533 | 0.65331961 | 0.85120266 |
| Abcg8       | 2.2948755  | 0.08076725 | 0.2824863  | 0.28591565 | 0.77494273 | NA         |
| Otc         | 0.76707621 | 0.08073196 | 0.19059479 | 0.42357906 | 0.67187283 | NA         |
| LOC1008622f | 0.64234232 | 0.08062742 | 0.20814716 | 0.38735776 | 0.69849137 | NA         |
| Mir6999     | 0.64234232 | 0.08062742 | 0.20814716 | 0.38735776 | 0.69849137 | NA         |
| Gpr26       | 0.64234232 | 0.08062742 | 0.20814716 | 0.38735776 | 0.69849137 | NA         |

|             |            |            |            |            |            |            |
|-------------|------------|------------|------------|------------|------------|------------|
| Tmprss7     | 3.6600386  | 0.08056273 | 0.38195311 | 0.21092309 | 0.83294728 | NA         |
| D330041H03  | 40.6989275 | 0.08051003 | 0.42576705 | 0.18909408 | 0.85001908 | 0.94277489 |
| Tor4a       | 943.707054 | 0.08012531 | 0.18358703 | 0.4364432  | 0.6625152  | 0.85619416 |
| Ube2s       | 4445.6252  | 0.08009684 | 0.24333047 | 0.32916898 | 0.74202796 | 0.89674206 |
| Znrd1       | 2961.40854 | 0.0800863  | 0.2112713  | 0.37906851 | 0.70463699 | 0.87942876 |
| Btbd1       | 3200.45131 | 0.08004484 | 0.17275325 | 0.4633478  | 0.64311509 | 0.84475739 |
| Rbakdn      | 79.7805329 | 0.08002358 | 0.41171559 | 0.19436616 | 0.84588919 | 0.94147896 |
| Guca2b      | 0.79895423 | 0.08002117 | 0.19416711 | 0.41212526 | 0.68024761 | NA         |
| AU023762    | 3.77910405 | 0.07985084 | 0.34999653 | 0.22814751 | 0.81953157 | NA         |
| Ccdc173     | 168.075894 | 0.07973531 | 0.26779079 | 0.29775226 | 0.76589226 | 0.90618168 |
| Rcor1       | 1726.03939 | 0.07970599 | 0.28920147 | 0.27560712 | 0.78284984 | 0.91399508 |
| Cyp4f16     | 1081.6194  | 0.07959933 | 0.22095244 | 0.36025547 | 0.71865609 | 0.88550762 |
| Nyx         | 5.1105029  | 0.07955962 | 0.40871966 | 0.19465571 | 0.84566249 | NA         |
| Asap2       | 2349.00673 | 0.07949448 | 0.19493074 | 0.40780885 | 0.68341401 | 0.86849484 |
| Enpp1       | 17.7141465 | 0.07946962 | 0.43225586 | 0.18384855 | 0.85413226 | 0.94431772 |
| E430025E21F | 8832.45737 | 0.07946388 | 0.20836635 | 0.38136619 | 0.70293155 | 0.87914497 |
| Pabpc4      | 11211.3619 | 0.07931529 | 0.20611699 | 0.38480717 | 0.70038029 | 0.87785127 |
| Gm7168      | 1.09068858 | 0.07928473 | 0.21164714 | 0.37460807 | 0.70795197 | NA         |
| Spint2      | 4567.34287 | 0.07928068 | 0.17353869 | 0.45684727 | 0.64778083 | 0.84806214 |
| Irak2       | 1191.70861 | 0.07923933 | 0.25409829 | 0.3118452  | 0.75515817 | 0.90191816 |
| Ppp1r42     | 3.9520096  | 0.07923263 | 0.39472586 | 0.20072823 | 0.84091108 | NA         |
| 0610009B22F | 2130.84534 | 0.07918331 | 0.17883771 | 0.44276629 | 0.65793479 | 0.85348214 |
| Ube2q2      | 3964.3148  | 0.07895963 | 0.17645539 | 0.44747646 | 0.65453108 | 0.85205197 |
| Cd37        | 880.848772 | 0.0788972  | 0.25625163 | 0.30788956 | 0.75816637 | 0.90307174 |
| A730090H04  | 9.37658983 | 0.07888275 | 0.42744163 | 0.18454625 | 0.85358495 | 0.94431772 |
| Rps15a-ps6  | 25.0606798 | 0.07879527 | 0.41666831 | 0.18910791 | 0.85000824 | 0.94277489 |
| Pi4ka       | 6341.9384  | 0.07876383 | 0.20901805 | 0.37682788 | 0.70630152 | 0.88052709 |
| Ppp1r7      | 5370.8624  | 0.07873703 | 0.18958008 | 0.41532333 | 0.67790523 | 0.86555439 |
| Csad        | 2293.44032 | 0.07865037 | 0.3004611  | 0.26176557 | 0.79350218 | 0.91957318 |
| C1qtnf1     | 30.3337997 | 0.07862332 | 0.43199207 | 0.18200177 | 0.85558134 | 0.94458789 |
| Ift43       | 612.815163 | 0.07861254 | 0.31454753 | 0.24992262 | 0.80264719 | 0.92349559 |
| Gm11538     | 25.288378  | 0.07860366 | 0.43213329 | 0.1818968  | 0.85566372 | 0.94458789 |
| 4930539M17  | 12.0843526 | 0.07858354 | 0.42299606 | 0.18577841 | 0.85261854 | 0.94417652 |
| Rims2       | 1374.38629 | 0.07857725 | 0.22471551 | 0.34967435 | 0.72658311 | 0.88950597 |
| Ccdc88c     | 5574.24861 | 0.07856029 | 0.23694122 | 0.33156026 | 0.74022133 | 0.89553306 |
| Alkbh4      | 787.347333 | 0.07849725 | 0.2069195  | 0.3793613  | 0.70441958 | 0.87942876 |
| Pdgfrl      | 54.5778774 | 0.07849118 | 0.43028444 | 0.18241697 | 0.85525551 | 0.94458789 |
| Fry         | 2884.44316 | 0.07848923 | 0.2823684  | 0.27796749 | 0.78103732 | 0.91325374 |
| Wdr18       | 7020.08713 | 0.07842163 | 0.21555725 | 0.36380882 | 0.71600077 | 0.88472721 |
| Gm14169     | 1.45429743 | 0.07839567 | 0.25899964 | 0.30268639 | 0.76212887 | NA         |
| Cox7a2      | 14815.1766 | 0.07839075 | 0.2122325  | 0.3693626  | 0.71185747 | 0.88328896 |

|             |            |            |            |            |            |            |
|-------------|------------|------------|------------|------------|------------|------------|
| AF357425    | 3.95139557 | 0.07836635 | 0.38281239 | 0.20471216 | 0.83779702 | NA         |
| Fam131b     | 2.91885812 | 0.07825663 | 0.33605252 | 0.23287024 | 0.81586217 | NA         |
| 1700029H14I | 1.3972077  | 0.07815866 | 0.25641463 | 0.30481357 | 0.76050814 | NA         |
| Pcdh8       | 7.54564145 | 0.07815493 | 0.42244366 | 0.18500674 | 0.85322375 | 0.94431772 |
| Cypt3       | 3.95601942 | 0.0780872  | 0.38278113 | 0.2039996  | 0.83835381 | NA         |
| Acr         | 1.37248543 | 0.07808331 | 0.25130522 | 0.31071107 | 0.75602028 | NA         |
| Gm6880      | 43.0296359 | 0.07803195 | 0.35236554 | 0.22145169 | 0.82474075 | 0.93107393 |
| Aqp1        | 2.81746223 | 0.07802428 | 0.36808936 | 0.21197103 | 0.83212964 | NA         |
| Hs1bp3      | 3724.4069  | 0.07783301 | 0.1885388  | 0.41282224 | 0.67973686 | 0.86637062 |
| Mtf1        | 1935.95627 | 0.07781191 | 0.20375278 | 0.38189371 | 0.70254021 | 0.87879687 |
| Cyth1       | 576.728536 | 0.07774356 | 0.21141329 | 0.36773262 | 0.71307262 | 0.88397496 |
| Psen2       | 518.153593 | 0.07769816 | 0.26024243 | 0.29856071 | 0.76527525 | 0.90610594 |
| 1700021K19F | 1287.00742 | 0.07749726 | 0.20685767 | 0.37464047 | 0.70792787 | 0.88112271 |
| 1700028E10F | 18.5356607 | 0.07733506 | 0.43038371 | 0.17968863 | 0.85739702 | 0.94538792 |
| Sap18       | 565.761165 | 0.07726072 | 0.21799556 | 0.3544142  | 0.7230285  | 0.88765129 |
| Rbks        | 118.183591 | 0.07722171 | 0.40798645 | 0.18927518 | 0.84987715 | 0.94277489 |
| Sis         | 1.69864901 | 0.07713628 | 0.2281587  | 0.33808171 | 0.73530161 | NA         |
| Ankrd49     | 1734.86328 | 0.07712523 | 0.1846446  | 0.41769554 | 0.67616973 | 0.864488   |
| Suv420h2    | 4861.07383 | 0.07707058 | 0.18598261 | 0.41439671 | 0.67858359 | 0.8660364  |
| Ccpg1os     | 359.500053 | 0.07706504 | 0.24427141 | 0.31548939 | 0.7523901  | 0.90182644 |
| Nlrp9c      | 6.6591747  | 0.07703083 | 0.36977157 | 0.20832004 | 0.83497909 | 0.93631091 |
| Ubn1        | 3128.18685 | 0.07678844 | 0.18362842 | 0.41817298 | 0.67582065 | 0.864488   |
| Ccdc22      | 1877.51487 | 0.076765   | 0.19777109 | 0.3881508  | 0.69790444 | 0.87652334 |
| Gpr158      | 0.83334867 | 0.07667709 | 0.18082146 | 0.42404861 | 0.67153036 | NA         |
| Il1rn       | 0.83334867 | 0.07667709 | 0.18082146 | 0.42404861 | 0.67153036 | NA         |
| Ahsa2       | 2799.34624 | 0.07665949 | 0.22928233 | 0.33434538 | 0.73811895 | 0.89452055 |
| Tssc1       | 2183.97459 | 0.07664275 | 0.21846684 | 0.35082098 | 0.72572265 | 0.88928462 |
| Rhbdd3      | 1118.9999  | 0.07660801 | 0.20633618 | 0.37127763 | 0.71043076 | 0.88209388 |
| D030040B21I | 1.5147984  | 0.07654399 | 0.2547378  | 0.30048146 | 0.76380993 | NA         |
| Gm10556     | 1.06922136 | 0.07653285 | 0.21060194 | 0.36340049 | 0.71630574 | NA         |
| D630024D03  | 36.8223607 | 0.07652546 | 0.40689523 | 0.18807166 | 0.85082048 | 0.94332734 |
| Pdcd5       | 3155.32105 | 0.07644831 | 0.19528417 | 0.39147213 | 0.69544828 | 0.87541586 |
| Pltp        | 3802.2905  | 0.076446   | 0.19632858 | 0.38937787 | 0.69699664 | 0.87645821 |
| Cacna1d     | 10.6883701 | 0.07639026 | 0.42964041 | 0.17780046 | 0.85887969 | 0.9455234  |
| Ftl1        | 133407.787 | 0.0763312  | 0.17880432 | 0.42689793 | 0.66945367 | 0.86052797 |
| Rnf44       | 9797.71255 | 0.07622888 | 0.22102439 | 0.34488897 | 0.73017784 | 0.89067944 |
| Pla2g15     | 2476.7105  | 0.07621359 | 0.24169095 | 0.31533488 | 0.75250741 | 0.90183745 |
| Srgap2      | 6620.0578  | 0.07619086 | 0.20545899 | 0.37083245 | 0.71076233 | 0.88233934 |
| Zbed4       | 1108.65895 | 0.07615608 | 0.1971535  | 0.38627813 | 0.6992907  | 0.87735184 |
| Rbm5        | 7644.20641 | 0.07615021 | 0.15294883 | 0.49788029 | 0.61856842 | 0.83083067 |
| Atg4d       | 2493.37956 | 0.07595031 | 0.19294362 | 0.39363993 | 0.6938469  | 0.87496374 |

|             |            |            |            |            |            |            |
|-------------|------------|------------|------------|------------|------------|------------|
| Mast4       | 780.749141 | 0.07594834 | 0.32315443 | 0.23502181 | 0.81419181 | 0.92878688 |
| Hspb9       | 4.62996472 | 0.0759381  | 0.39419093 | 0.19264294 | 0.84723861 | NA         |
| Ccdc135     | 23.2831652 | 0.07591724 | 0.42294896 | 0.17949504 | 0.85754901 | 0.94538792 |
| Cttnbp2     | 651.071843 | 0.07590841 | 0.41764385 | 0.18175392 | 0.85577585 | 0.94458789 |
| Tmem147     | 2721.65964 | 0.07588846 | 0.19321072 | 0.39277564 | 0.6944852  | 0.87496374 |
| Eno4        | 71.2292436 | 0.07584757 | 0.38990542 | 0.19452813 | 0.84576237 | 0.94147896 |
| Rab42       | 21.4017586 | 0.07582282 | 0.41411105 | 0.1830978  | 0.85472128 | 0.94455448 |
| Apitd1      | 1567.37243 | 0.07568765 | 0.20492213 | 0.36934836 | 0.71186808 | 0.88328896 |
| Alad        | 2714.67977 | 0.07566833 | 0.19851949 | 0.38116321 | 0.70308215 | 0.8791919  |
| Gpm6a       | 0.6616705  | 0.07563363 | 0.20947834 | 0.36105704 | 0.71805681 | NA         |
| 9230114K14F | 234.177179 | 0.0756012  | 0.3140381  | 0.24073895 | 0.80975745 | 0.92748171 |
| Ezh2        | 15568.2677 | 0.07553059 | 0.1557215  | 0.48503634 | 0.62765057 | 0.8353812  |
| Uqcrb       | 12486.1729 | 0.07547941 | 0.19601648 | 0.38506667 | 0.70018802 | 0.87785127 |
| Slirp       | 4706.53996 | 0.07543487 | 0.20560614 | 0.36689014 | 0.71370097 | 0.88418475 |
| Txndc5      | 9242.86225 | 0.07532972 | 0.19187189 | 0.39260427 | 0.69461179 | 0.87496374 |
| Mtag2       | 5.07047773 | 0.07531646 | 0.40104004 | 0.18780286 | 0.8510312  | NA         |
| Preb        | 4177.39092 | 0.07530378 | 0.16838088 | 0.44722285 | 0.65471417 | 0.85212302 |
| Amdhd1      | 7.50457169 | 0.07526937 | 0.41961243 | 0.17937832 | 0.85764065 | 0.94538792 |
| 9130401M01  | 3834.50203 | 0.0752164  | 0.16752544 | 0.44898493 | 0.65344253 | 0.85120495 |
| Mir6954     | 0.99542832 | 0.07504281 | 0.26043911 | 0.28813955 | 0.77323992 | NA         |
| Cr1l        | 1519.39894 | 0.07499641 | 0.16967493 | 0.44200051 | 0.65848884 | 0.85384474 |
| Rgp1        | 2112.37952 | 0.07499611 | 0.20396462 | 0.36769178 | 0.71310307 | 0.88397496 |
| Nceh1       | 3291.86329 | 0.07497783 | 0.26504017 | 0.28289231 | 0.77725939 | 0.91161934 |
| Fgd1        | 7112.42691 | 0.07497276 | 0.18862261 | 0.39747494 | 0.69101726 | 0.87365931 |
| B3galt1     | 17.0355426 | 0.07494471 | 0.43226267 | 0.1733777  | 0.86235455 | 0.94646592 |
| AA474331    | 66.9920274 | 0.07491675 | 0.35056528 | 0.21370272 | 0.83077889 | 0.9337556  |
| Dreh        | 1.05667153 | 0.07489085 | 0.20997708 | 0.356662   | 0.72134486 | NA         |
| Arpc1a      | 6286.12893 | 0.07486474 | 0.17437401 | 0.42933425 | 0.66767999 | 0.85924293 |
| Olig1       | 1219.89067 | 0.07480583 | 0.36133444 | 0.20702657 | 0.8359891  | 0.93697056 |
| Lgals2      | 2.70380701 | 0.07474997 | 0.32531341 | 0.22977832 | 0.81826404 | NA         |
| Ppm1g       | 13678.3814 | 0.07472777 | 0.22379448 | 0.33391248 | 0.73844561 | 0.89463755 |
| Npm3        | 7892.18289 | 0.07464532 | 0.17715605 | 0.42135349 | 0.67349697 | 0.86321737 |
| Prame       | 1.80601463 | 0.07454031 | 0.29988327 | 0.2485644  | 0.80369775 | NA         |
| Stx16       | 3330.77993 | 0.07451015 | 0.16319191 | 0.45657993 | 0.647973   | 0.84807194 |
| Il17d       | 122.234381 | 0.07447913 | 0.36043984 | 0.20663402 | 0.83629569 | 0.93698697 |
| Tex35       | 2.17478092 | 0.07443722 | 0.32139013 | 0.23161015 | 0.81684082 | NA         |
| Dnase2a     | 3627.97469 | 0.07438209 | 0.27474248 | 0.27073386 | 0.78659573 | 0.91606931 |
| Osgepl1     | 1180.29633 | 0.07436002 | 0.20029621 | 0.37125025 | 0.71045115 | 0.88209388 |
| Zyg11a      | 2584.53439 | 0.0743474  | 0.27969987 | 0.26581134 | 0.79038451 | 0.91812832 |
| Ckap4       | 5015.24971 | 0.07428723 | 0.19138573 | 0.38815449 | 0.69790171 | 0.87652334 |
| Zbtb5       | 875.959674 | 0.07426841 | 0.19407979 | 0.38266948 | 0.70196485 | 0.87857842 |

|             |            |            |            |            |            |            |
|-------------|------------|------------|------------|------------|------------|------------|
| Pcdh12      | 1.15995075 | 0.07422413 | 0.21424706 | 0.34644177 | 0.72901074 | NA         |
| Adrm1       | 4240.98442 | 0.07406786 | 0.21345305 | 0.34699835 | 0.72859256 | 0.8900505  |
| Grk1        | 6.94911192 | 0.07404237 | 0.41898773 | 0.17671728 | 0.85973046 | 0.9455234  |
| Icam4       | 67.6943796 | 0.07402237 | 0.3968784  | 0.18651146 | 0.8520437  | 0.94387602 |
| Hrc         | 70.2777351 | 0.07398803 | 0.40111295 | 0.18445685 | 0.85365507 | 0.94431772 |
| Stk36       | 294.49113  | 0.07395218 | 0.20976976 | 0.35253975 | 0.72443351 | 0.88863204 |
| Rab11fip3   | 2115.57875 | 0.07387334 | 0.19653435 | 0.37588005 | 0.70700608 | 0.88082991 |
| Trip4       | 3871.70931 | 0.07385942 | 0.17659787 | 0.41823505 | 0.67577527 | 0.864488   |
| Cchcr1      | 1721.95939 | 0.07372969 | 0.18583566 | 0.3967467  | 0.69155426 | 0.87391917 |
| Tmem45a     | 351.748063 | 0.07369842 | 0.35453911 | 0.20787105 | 0.83532965 | 0.9365437  |
| Cacnb2      | 5.50200863 | 0.07360261 | 0.40712503 | 0.18078626 | 0.85653535 | NA         |
| Zfp574      | 2009.09865 | 0.07359635 | 0.23069312 | 0.31902273 | 0.74970928 | 0.90092221 |
| Wwtr1       | 5777.61689 | 0.07358348 | 0.1944937  | 0.37833347 | 0.70518288 | 0.87969669 |
| Fdxacb1     | 913.070134 | 0.07355197 | 0.21503587 | 0.34204514 | 0.73231692 | 0.891798   |
| Smurf1      | 2409.64267 | 0.07349304 | 0.1904671  | 0.38585686 | 0.69960268 | 0.87759307 |
| Ppp1r14a    | 286.812485 | 0.07342809 | 0.26646923 | 0.27555934 | 0.78288654 | 0.91399508 |
| Mbd3        | 5922.86751 | 0.07341086 | 0.21968784 | 0.33415988 | 0.73825892 | 0.8945646  |
| Sycn        | 1.99815313 | 0.07335099 | 0.23610311 | 0.31067356 | 0.7560488  | NA         |
| Naa10       | 4093.42773 | 0.07331677 | 0.22131956 | 0.33127108 | 0.74043973 | 0.89565792 |
| Hspe1       | 14456.4908 | 0.0733065  | 0.24930947 | 0.29403815 | 0.76872875 | 0.90715593 |
| Rps6kc1     | 1004.81996 | 0.07329124 | 0.21826771 | 0.33578598 | 0.73703226 | 0.89391803 |
| 4631405J19R | 0.93193763 | 0.07322445 | 0.23118251 | 0.31673872 | 0.75144187 | NA         |
| Ugt8a       | 293.41802  | 0.0732023  | 0.32353915 | 0.22625485 | 0.82100321 | 0.93076517 |
| Nanog       | 81469.0355 | 0.07315966 | 0.17834593 | 0.41021213 | 0.68165035 | 0.86734737 |
| Tspan10     | 4.24399382 | 0.07315428 | 0.3494294  | 0.20935352 | 0.83417227 | NA         |
| Pigk        | 3127.80939 | 0.07307655 | 0.18372802 | 0.39774311 | 0.69081955 | 0.87364263 |
| Nup93       | 16838.7351 | 0.07297215 | 0.21666769 | 0.33679295 | 0.73627299 | 0.89375116 |
| Speer7-ps1  | 1.29424476 | 0.07296354 | 0.18562607 | 0.39306734 | 0.69426974 | NA         |
| Vps11       | 4744.57617 | 0.07285545 | 0.20087221 | 0.36269552 | 0.71683235 | 0.88475711 |
| Heatr3      | 7957.49631 | 0.0728169  | 0.24518213 | 0.29699106 | 0.76647334 | 0.90621355 |
| Mapk1ip1l   | 7517.73182 | 0.0727646  | 0.23371728 | 0.31133596 | 0.75554523 | 0.90203956 |
| Emc1        | 4062.57844 | 0.07270492 | 0.20001817 | 0.36349159 | 0.71623769 | 0.88475132 |
| Plod1       | 2092.16353 | 0.07253579 | 0.25706517 | 0.28216887 | 0.77781402 | 0.91206348 |
| Zfp664      | 6998.1538  | 0.07251934 | 0.19110542 | 0.37947295 | 0.70433669 | 0.87942876 |
| Dhx37       | 3318.84046 | 0.07249213 | 0.21192379 | 0.34206696 | 0.7323005  | 0.891798   |
| 5430405H02I | 61.538763  | 0.07243658 | 0.34282714 | 0.21129184 | 0.83265955 | 0.93498494 |
| Gm853       | 16.6524819 | 0.07243388 | 0.40120162 | 0.18054235 | 0.85672681 | 0.9449577  |
| Uba1y       | 1636.87947 | 0.07242599 | 0.21167708 | 0.34215322 | 0.73223559 | 0.891798   |
| D11Wsu47e   | 2428.17312 | 0.07242042 | 0.20800818 | 0.34816139 | 0.72771898 | 0.88986097 |
| Rbm42       | 4863.16312 | 0.07237101 | 0.22749958 | 0.3181149  | 0.75039778 | 0.90095125 |
| Mrpl14      | 1424.34653 | 0.07225998 | 0.21675931 | 0.33336505 | 0.73885874 | 0.8948635  |

|             |            |            |            |            |            |            |
|-------------|------------|------------|------------|------------|------------|------------|
| Dennd2d     | 37.20908   | 0.07222126 | 0.43028257 | 0.16784611 | 0.86670435 | 0.94861203 |
| Gsdmc       | 1.05127744 | 0.07219385 | 0.20705617 | 0.34866793 | 0.72733862 | NA         |
| Tmem132e    | 1.05127744 | 0.07219385 | 0.20705617 | 0.34866793 | 0.72733862 | NA         |
| lqcf3       | 1.49111848 | 0.07211828 | 0.19185077 | 0.37590819 | 0.70698515 | NA         |
| Rnf40       | 6854.61524 | 0.07204389 | 0.20026781 | 0.35973775 | 0.71904326 | 0.88576059 |
| LOC171588   | 1.42919777 | 0.07204313 | 0.25423711 | 0.28336985 | 0.77689334 | NA         |
| Bcar1       | 1682.96503 | 0.07200575 | 0.22892876 | 0.31453341 | 0.75311594 | 0.90191816 |
| Chd7        | 2777.80505 | 0.07192978 | 0.23838024 | 0.30174389 | 0.76284731 | 0.90517207 |
| Tubb6       | 4313.29986 | 0.07181815 | 0.20266779 | 0.35436391 | 0.72306618 | 0.88765129 |
| Strip1      | 2977.80456 | 0.07169968 | 0.20494461 | 0.34984908 | 0.72645196 | 0.88950597 |
| Zc3hav1     | 5185.82495 | 0.07165478 | 0.21281113 | 0.33670596 | 0.73633857 | 0.89375594 |
| 1700042O10I | 244.873118 | 0.0715641  | 0.35096323 | 0.20390768 | 0.83842565 | 0.93801131 |
| Dnlz        | 942.359587 | 0.07155884 | 0.25197333 | 0.28399371 | 0.7764152  | 0.91097274 |
| Spr2b       | 4.54552737 | 0.07151783 | 0.23764244 | 0.30094721 | 0.76345475 | NA         |
| Usp49       | 3114.03675 | 0.071497   | 0.18040194 | 0.39632057 | 0.69186855 | 0.87409602 |
| Ankrd54     | 1133.99251 | 0.0714805  | 0.21691746 | 0.32952858 | 0.7417562  | 0.89662267 |
| 1110001J03R | 984.433474 | 0.07145769 | 0.25041423 | 0.28535796 | 0.77536991 | 0.91030389 |
| Zyx         | 236.501544 | 0.07135918 | 0.30929418 | 0.23071621 | 0.81753528 | 0.93024054 |
| Hadh        | 11140.4584 | 0.0712647  | 0.18807002 | 0.37892643 | 0.70474249 | 0.87942876 |
| Polr2f      | 5056.70208 | 0.07116765 | 0.22761496 | 0.31266686 | 0.75453378 | 0.90191816 |
| Snora34     | 3.09461977 | 0.0711323  | 0.37086917 | 0.19179889 | 0.84789974 | NA         |
| Ovol2       | 242.928432 | 0.07112478 | 0.23282112 | 0.30549112 | 0.75999214 | 0.90409661 |
| Scn9a       | 1.13485109 | 0.0710559  | 0.21313652 | 0.3333821  | 0.73884588 | NA         |
| Mir450b     | 0.9193878  | 0.0709929  | 0.23050496 | 0.3079886  | 0.758091   | NA         |
| Tas1r2      | 0.9193878  | 0.0709929  | 0.23050496 | 0.3079886  | 0.758091   | NA         |
| Speer8-ps1  | 1.7914665  | 0.07093799 | 0.27364415 | 0.25923443 | 0.79545437 | NA         |
| Elmod3      | 667.447828 | 0.07055273 | 0.22931135 | 0.30767221 | 0.75833177 | 0.90307174 |
| Uty         | 1539.06255 | 0.0705051  | 0.21253863 | 0.33172842 | 0.74009434 | 0.89544909 |
| Frmd7       | 1.3339662  | 0.07046064 | 0.27887029 | 0.25266455 | 0.80052744 | NA         |
| Mafk        | 397.307623 | 0.07022822 | 0.24573787 | 0.2857851  | 0.77504272 | 0.91029675 |
| Phkb        | 2809.69635 | 0.07020471 | 0.19886442 | 0.35302798 | 0.72406746 | 0.88829071 |
| Smarcc2     | 2747.3426  | 0.07014253 | 0.1964985  | 0.35696218 | 0.72112012 | 0.88656328 |
| Ppox        | 1421.94615 | 0.07012681 | 0.23031622 | 0.30448057 | 0.7607618  | 0.90435844 |
| 1700019B03F | 2.16348784 | 0.07002506 | 0.30304461 | 0.2310718  | 0.81725902 | NA         |
| Nova2       | 593.274047 | 0.07001917 | 0.36260991 | 0.1930978  | 0.84688238 | 0.94147896 |
| Zfy2        | 16.4036487 | 0.06999541 | 0.35088924 | 0.19948006 | 0.84188724 | 0.93972068 |
| Jade1       | 28503.0089 | 0.06986549 | 0.20169108 | 0.34639849 | 0.72904326 | 0.89032067 |
| Mir1249     | 3.65410482 | 0.0698044  | 0.38337509 | 0.1820786  | 0.85552104 | NA         |
| Ctnnd1      | 18169.477  | 0.06972053 | 0.19668717 | 0.35447424 | 0.72298351 | 0.88765129 |
| Trub2       | 3761.40281 | 0.0697139  | 0.18129799 | 0.38452662 | 0.70058817 | 0.87785127 |
| Tfg         | 6242.37955 | 0.06964977 | 0.15530831 | 0.44846132 | 0.65382029 | 0.85148307 |



|             |            |            |            |            |            |            |
|-------------|------------|------------|------------|------------|------------|------------|
| Fam222a     | 383.525819 | 0.06960272 | 0.27279688 | 0.25514484 | 0.79861124 | 0.92171351 |
| Grrp1       | 102.202021 | 0.06957718 | 0.30542097 | 0.22780747 | 0.81979592 | 0.93051161 |
| Brpf3       | 6936.44194 | 0.06944779 | 0.21086674 | 0.32934445 | 0.74189535 | 0.89665148 |
| Ccdc6       | 5589.04342 | 0.06940904 | 0.20050789 | 0.34616615 | 0.72921785 | 0.89032479 |
| Hsf3        | 29.2693873 | 0.06928853 | 0.43107075 | 0.16073586 | 0.87230144 | 0.95107339 |
| Prkx        | 1033.9076  | 0.0692619  | 0.26121885 | 0.26514894 | 0.79089473 | 0.91829081 |
| Suv39h1     | 910.962108 | 0.06918607 | 0.18910273 | 0.36586502 | 0.7144658  | 0.88425449 |
| Ubr1        | 3985.42529 | 0.06917543 | 0.21447673 | 0.32253118 | 0.74705032 | 0.89975744 |
| Ckb         | 51406.0608 | 0.06912355 | 0.27880655 | 0.24792655 | 0.80419123 | 0.92388669 |
| Fam160b2    | 1415.84995 | 0.06908938 | 0.2312472  | 0.29876849 | 0.7651167  | 0.90610594 |
| Cdk4        | 36053.7927 | 0.06904359 | 0.17821804 | 0.38741081 | 0.69845211 | 0.87699868 |
| Strada      | 3272.16707 | 0.06899439 | 0.18755765 | 0.36785696 | 0.71297989 | 0.88397496 |
| Gm4566      | 0.96833037 | 0.06895598 | 0.23046257 | 0.29920685 | 0.76478222 | NA         |
| Fgf14       | 0.96833037 | 0.06895598 | 0.23046257 | 0.29920685 | 0.76478222 | NA         |
| 4930430J02R | 0.96833037 | 0.06895598 | 0.23046257 | 0.29920685 | 0.76478222 | NA         |
| Tmc7        | 1754.27575 | 0.068929   | 0.357445   | 0.19283805 | 0.84708581 | 0.94147896 |
| Trim12a     | 335.296642 | 0.06881432 | 0.23037138 | 0.29871037 | 0.76516105 | 0.90610594 |
| Rab3il1     | 413.83046  | 0.06874786 | 0.37725844 | 0.18223014 | 0.85540212 | 0.94458789 |
| Unc45b      | 34.3720183 | 0.06874766 | 0.43177997 | 0.1592192  | 0.87349618 | 0.95171748 |
| Snx9        | 1754.5837  | 0.0687176  | 0.27866352 | 0.24659705 | 0.80522009 | 0.92440408 |
| Farsa       | 6933.21877 | 0.06865246 | 0.2463624  | 0.27866451 | 0.7805023  | 0.91308099 |
| Mir682      | 56.6496925 | 0.06860799 | 0.35478381 | 0.19337971 | 0.8466616  | 0.94147896 |
| Gm15816     | 22.6141834 | 0.06841673 | 0.42986817 | 0.15915748 | 0.87354481 | 0.95171748 |
| Plscr4      | 5.73512181 | 0.06840845 | 0.40563808 | 0.16864406 | 0.86607662 | NA         |
| Mir6913     | 6.51310108 | 0.0683805  | 0.38744821 | 0.17648941 | 0.85990947 | 0.9455234  |
| lqcf1       | 2.43589401 | 0.06837594 | 0.29292489 | 0.23342481 | 0.81543155 | NA         |
| Tmem9       | 2124.84748 | 0.06837325 | 0.19490369 | 0.35080533 | 0.7257344  | 0.88928462 |
| Tgif1       | 8924.24424 | 0.06820872 | 0.16638256 | 0.40995115 | 0.68184178 | 0.86734737 |
| Higd2a      | 3750.95446 | 0.06804736 | 0.19981912 | 0.34054479 | 0.7334463  | 0.892514   |
| E130308A19f | 1231.1646  | 0.06785264 | 0.20373194 | 0.33304862 | 0.73909758 | 0.89494387 |
| Fitm1       | 15.2366901 | 0.0678088  | 0.43131819 | 0.15721294 | 0.87507703 | 0.95249688 |
| Serpini1    | 367.864819 | 0.06768958 | 0.20982975 | 0.32259287 | 0.7470036  | 0.89975744 |
| Tmem53      | 60.0841771 | 0.0675877  | 0.34049224 | 0.19849997 | 0.84265391 | 0.9401041  |
| Phlpp2      | 1483.23929 | 0.0673932  | 0.28485821 | 0.23658506 | 0.81297871 | 0.92878688 |
| Pdhb        | 11792.7472 | 0.06733057 | 0.21576472 | 0.31205551 | 0.75499833 | 0.90191816 |
| Psmb4       | 16334.2075 | 0.06731332 | 0.19625706 | 0.34298546 | 0.7316094  | 0.89154993 |
| Drp2        | 122.487466 | 0.06731317 | 0.28279586 | 0.23802741 | 0.81185983 | 0.92853073 |
| Apmap       | 1494.15689 | 0.06730234 | 0.15353356 | 0.43835588 | 0.66112832 | 0.85541281 |
| Rab6a       | 10814.6434 | 0.06727723 | 0.19660162 | 0.34220078 | 0.7321998  | 0.891798   |
| Nub1        | 8683.68103 | 0.06726895 | 0.16612735 | 0.40492399 | 0.68553338 | 0.86997957 |
| Gm16291     | 0.9486248  | 0.06706047 | 0.23185446 | 0.28923517 | 0.77240142 | NA         |

|             |            |            |            |            |            |            |
|-------------|------------|------------|------------|------------|------------|------------|
| Dkk2        | 1.33840726 | 0.06698485 | 0.18656914 | 0.35903501 | 0.7195689  | NA         |
| Galt        | 1897.84678 | 0.06692618 | 0.1870097  | 0.35787545 | 0.72043652 | 0.88638309 |
| Tubb2a-ps2  | 17.673958  | 0.06687262 | 0.42085162 | 0.15889832 | 0.87374898 | 0.95171748 |
| Rac1        | 8692.36358 | 0.06687216 | 0.15552435 | 0.42997874 | 0.66721111 | 0.85915695 |
| St6gal1     | 525.266225 | 0.06682499 | 0.25339774 | 0.26371582 | 0.79199891 | 0.91885818 |
| Cyfip1      | 13498.0268 | 0.06677159 | 0.17901281 | 0.37299892 | 0.70914925 | 0.88153317 |
| Mrto4       | 5101.9515  | 0.06672232 | 0.17299089 | 0.38569849 | 0.69971998 | 0.87766942 |
| Gm16998     | 0.63996664 | 0.06671385 | 0.17969148 | 0.37126887 | 0.71043728 | NA         |
| Ap3d1       | 8946.40907 | 0.06664188 | 0.21942974 | 0.30370488 | 0.76135274 | 0.90466935 |
| Ak6         | 2230.43834 | 0.06662826 | 0.18641406 | 0.35742078 | 0.72077682 | 0.88656176 |
| Sf3b5       | 6604.99494 | 0.06658624 | 0.21827356 | 0.30505864 | 0.76032149 | 0.90431969 |
| Foxo4       | 2708.54743 | 0.06656054 | 0.19587927 | 0.33980392 | 0.73400419 | 0.89252476 |
| Cacng6      | 74.6555244 | 0.06640175 | 0.42258601 | 0.15713191 | 0.87514089 | 0.95249972 |
| Tmem40      | 1167.5644  | 0.06640095 | 0.31763437 | 0.20904838 | 0.83441047 | 0.93601076 |
| 9430076C15F | 0.64712238 | 0.06636023 | 0.17840534 | 0.37196323 | 0.70992022 | NA         |
| Slamf7      | 0.64712238 | 0.06636023 | 0.17840534 | 0.37196323 | 0.70992022 | NA         |
| Defb47      | 0.64712238 | 0.06636023 | 0.17840534 | 0.37196323 | 0.70992022 | NA         |
| 4930402K13F | 0.64712238 | 0.06636023 | 0.17840534 | 0.37196323 | 0.70992022 | NA         |
| Tle1        | 2315.96626 | 0.06635257 | 0.20762911 | 0.31957255 | 0.74929238 | 0.90084943 |
| Cd101       | 11.4539019 | 0.06634732 | 0.43226633 | 0.15348714 | 0.87801413 | 0.95329223 |
| Mfn1        | 14309.9905 | 0.0662584  | 0.24517463 | 0.27024982 | 0.78696807 | 0.9162057  |
| 9130204L05F | 6.56892749 | 0.06617087 | 0.27596047 | 0.23978389 | 0.8104978  | 0.9275573  |
| Chrn2       | 46.1370037 | 0.06612282 | 0.35366243 | 0.18696591 | 0.85168736 | 0.94375019 |
| Surf1       | 1671.06296 | 0.06609012 | 0.19416878 | 0.3403746  | 0.73357445 | 0.892514   |
| Mir1905     | 1.25076994 | 0.06605134 | 0.24998667 | 0.26421945 | 0.79161083 | NA         |
| Gm12830     | 1.25076994 | 0.06605134 | 0.24998667 | 0.26421945 | 0.79161083 | NA         |
| Arhgap42    | 1785.67673 | 0.06604472 | 0.23047619 | 0.28655767 | 0.77445103 | 0.9100414  |
| Sim1        | 4.01020923 | 0.066016   | 0.38571432 | 0.17115258 | 0.8641038  | NA         |
| Tbc1d7      | 673.284352 | 0.06587542 | 0.2419463  | 0.27227291 | 0.78541218 | 0.91545082 |
| Ets2        | 3304.99134 | 0.06577674 | 0.20014481 | 0.32864572 | 0.74242348 | 0.8969825  |
| Ccdc103     | 37.9238944 | 0.06569649 | 0.41944417 | 0.15662749 | 0.87553844 | 0.95264507 |
| Ttll1       | 905.337345 | 0.0656357  | 0.22504374 | 0.29165751 | 0.7705485  | 0.90826951 |
| Kctd5       | 6129.97105 | 0.06562054 | 0.15794735 | 0.41545835 | 0.6778064  | 0.86555439 |
| 1600002H07I | 2179.72551 | 0.06561988 | 0.1830337  | 0.35851255 | 0.71995978 | 0.88604736 |
| Hist1h4h    | 8.56144758 | 0.06561066 | 0.42699407 | 0.15365708 | 0.87788013 | 0.95329223 |
| Il13        | 0.6328109  | 0.06559435 | 0.17907917 | 0.36628685 | 0.71415104 | NA         |
| Mir7230     | 0.6328109  | 0.06559435 | 0.17907917 | 0.36628685 | 0.71415104 | NA         |
| AA986860    | 167.496149 | 0.06552183 | 0.42870648 | 0.1528361  | 0.87852752 | 0.95344975 |
| Dynlrb1     | 4065.87493 | 0.0654511  | 0.19394474 | 0.33747296 | 0.73576039 | 0.89354236 |
| lqsec1      | 2393.79271 | 0.06543434 | 0.20284231 | 0.32258725 | 0.74700785 | 0.89975744 |
| Ppp5c       | 6747.834   | 0.06541603 | 0.19071494 | 0.34300424 | 0.73159527 | 0.89154993 |

|             |            |            |            |            |            |            |
|-------------|------------|------------|------------|------------|------------|------------|
| Zscan25     | 870.459958 | 0.06540614 | 0.18943641 | 0.34526702 | 0.72989364 | 0.89059051 |
| Emc3        | 3141.27783 | 0.0653731  | 0.17211381 | 0.37982482 | 0.70407546 | 0.87942876 |
| 4933408J17R | 0.94686315 | 0.06531429 | 0.22937674 | 0.28474678 | 0.77583814 | NA         |
| Sec24b      | 2811.70447 | 0.06519156 | 0.21605603 | 0.30173451 | 0.76285446 | 0.90517207 |
| Uqcc1       | 3238.10667 | 0.06518118 | 0.15403793 | 0.42315022 | 0.67218566 | 0.86225846 |
| Mdm2        | 10537.6756 | 0.06517998 | 0.19224    | 0.33905525 | 0.73456811 | 0.89293119 |
| Cnm3        | 1785.69049 | 0.06510292 | 0.20860931 | 0.31208062 | 0.75497925 | 0.90191816 |
| Lyp1a1      | 1273.68895 | 0.06501774 | 0.24323446 | 0.2673048  | 0.78923449 | 0.91766475 |
| Smpd4       | 8773.30804 | 0.06493137 | 0.20246121 | 0.32071015 | 0.74843006 | 0.900659   |
| 4930511M06  | 3.12336732 | 0.0648597  | 0.37394775 | 0.1734459  | 0.86230095 | NA         |
| 1700012D01I | 14.7984089 | 0.06475896 | 0.43182274 | 0.14996654 | 0.88079101 | 0.9545784  |
| Mir341      | 0.98765855 | 0.06475058 | 0.23124951 | 0.28000311 | 0.77947512 | NA         |
| Sds         | 0.62741681 | 0.06472683 | 0.17861166 | 0.3623886  | 0.71706165 | NA         |
| Frmpd4      | 0.62741681 | 0.06472683 | 0.17861166 | 0.3623886  | 0.71706165 | NA         |
| Kel         | 0.62741681 | 0.06472683 | 0.17861166 | 0.3623886  | 0.71706165 | NA         |
| Prrxl1      | 0.62741681 | 0.06472683 | 0.17861166 | 0.3623886  | 0.71706165 | NA         |
| Unc13b      | 3436.5011  | 0.06464499 | 0.22950747 | 0.28166835 | 0.77819783 | 0.91216552 |
| Pabpn1      | 22817.4175 | 0.06463469 | 0.18471205 | 0.34992135 | 0.72639772 | 0.88950597 |
| Nid1        | 42561.059  | 0.0645666  | 0.19171321 | 0.33678742 | 0.73627716 | 0.89375116 |
| Top1        | 14920.32   | 0.06455548 | 0.23881269 | 0.27031847 | 0.78691526 | 0.9162057  |
| Tmigd1      | 0.93431332 | 0.06455334 | 0.23110058 | 0.27933006 | 0.77999154 | NA         |
| Mir7022     | 0.93431332 | 0.06455334 | 0.23110058 | 0.27933006 | 0.77999154 | NA         |
| Adat3       | 389.234782 | 0.06450937 | 0.25700149 | 0.25100775 | 0.80180812 | 0.92325551 |
| Grin2b      | 2.73996311 | 0.06448454 | 0.2903308  | 0.22210713 | 0.82423049 | NA         |
| Triap1      | 1965.54652 | 0.0644527  | 0.17734941 | 0.36342213 | 0.71628957 | 0.88475132 |
| S100a16     | 116.703174 | 0.06444354 | 0.36595547 | 0.17609666 | 0.860218   | 0.9455234  |
| Dos         | 581.355839 | 0.06438162 | 0.23073223 | 0.27903176 | 0.78022045 | 0.91308099 |
| Nxn12       | 3.78562962 | 0.06423258 | 0.37429886 | 0.17160773 | 0.86374593 | NA         |
| Sphk1       | 68.8329621 | 0.06419954 | 0.36237004 | 0.17716571 | 0.85937823 | 0.9455234  |
| 1700031F05F | 0.62565515 | 0.06419379 | 0.17809161 | 0.36045377 | 0.71850782 | NA         |
| Wt1os       | 0.62565515 | 0.06419379 | 0.17809161 | 0.36045377 | 0.71850782 | NA         |
| Gm4952      | 0.62565515 | 0.06419379 | 0.17809161 | 0.36045377 | 0.71850782 | NA         |
| Zbtb17      | 2620.57819 | 0.06418332 | 0.19303604 | 0.33249396 | 0.7395163  | 0.89516758 |
| 1700094J05R | 1.09543995 | 0.06418098 | 0.20860579 | 0.30766636 | 0.75833622 | NA         |
| Bglap       | 0.98325588 | 0.06415632 | 0.23339232 | 0.27488618 | 0.78340369 | NA         |
| Mir302b     | 0.98325588 | 0.06415632 | 0.23339232 | 0.27488618 | 0.78340369 | NA         |
| Wfikkn1     | 38.9216172 | 0.06414888 | 0.38753456 | 0.16553074 | 0.86852626 | 0.9493136  |
| Tox2        | 1.33358882 | 0.06410701 | 0.28207375 | 0.22727039 | 0.82021349 | NA         |
| Comt        | 2038.59179 | 0.06400291 | 0.2192015  | 0.29198208 | 0.77030032 | 0.90826254 |
| Ror2        | 2162.87388 | 0.06389729 | 0.2778745  | 0.22995016 | 0.8181305  | 0.93032296 |
| Gm15800     | 2765.35693 | 0.06386685 | 0.24554958 | 0.26009757 | 0.79478851 | 0.91980692 |

|             |            |            |            |            |            |            |
|-------------|------------|------------|------------|------------|------------|------------|
| Tmem107     | 992.662738 | 0.06384016 | 0.22825614 | 0.27968649 | 0.77971804 | 0.91291939 |
| Atrn        | 2124.01018 | 0.06380554 | 0.21452439 | 0.2974279  | 0.76613985 | 0.90618168 |
| Sptssa      | 2142.85501 | 0.06373904 | 0.15125316 | 0.42140636 | 0.67345838 | 0.86321737 |
| Efcc1       | 20.4684851 | 0.06369106 | 0.41530388 | 0.15336013 | 0.87811428 | 0.95329223 |
| Plau        | 19.357599  | 0.06367015 | 0.43226563 | 0.14729403 | 0.88289994 | 0.95554672 |
| Sox17       | 56.8654898 | 0.06349365 | 0.42294808 | 0.15012162 | 0.88066866 | 0.95457436 |
| 1700124L16F | 15.015883  | 0.06346807 | 0.43216468 | 0.14686085 | 0.88324186 | 0.95568774 |
| Pthr1       | 344.720373 | 0.06343638 | 0.23943787 | 0.2649388  | 0.79105661 | 0.91829081 |
| Kdm1a       | 21617.8178 | 0.06336023 | 0.1978835  | 0.32018953 | 0.74882466 | 0.9007559  |
| Slc25a47    | 78.6241859 | 0.06331973 | 0.3192411  | 0.19834455 | 0.8427755  | 0.9401723  |
| Prf1        | 1.59945327 | 0.06319054 | 0.29262948 | 0.21594045 | 0.82903417 | NA         |
| Actr1b      | 5217.22256 | 0.063118   | 0.1979989  | 0.31877952 | 0.74989371 | 0.90092664 |
| Syce1       | 1043.04099 | 0.0631104  | 0.2120069  | 0.29768086 | 0.76594675 | 0.90618168 |
| Rnf149      | 3349.1819  | 0.06305646 | 0.1839705  | 0.34275309 | 0.73178422 | 0.89163805 |
| Gm1141      | 36.5214289 | 0.06298325 | 0.41103325 | 0.15323151 | 0.87821571 | 0.95329223 |
| Rnf169      | 3399.51152 | 0.06298277 | 0.23268016 | 0.2706839  | 0.78663416 | 0.91606931 |
| Zfand5      | 4384.35989 | 0.06296214 | 0.19770348 | 0.31846755 | 0.7501303  | 0.90092664 |
| Tbrg4       | 7721.1243  | 0.06292513 | 0.21814402 | 0.28845682 | 0.77299708 | 0.90963886 |
| Mir1934     | 1.23106437 | 0.06287123 | 0.24927164 | 0.25221976 | 0.80087121 | NA         |
| 1700119H24I | 0.61310532 | 0.06286022 | 0.17789834 | 0.35334913 | 0.72382672 | NA         |
| Gm14635     | 0.61310532 | 0.06286022 | 0.17789834 | 0.35334913 | 0.72382672 | NA         |
| Ppib        | 17625.3043 | 0.06278641 | 0.18794473 | 0.3340685  | 0.73832787 | 0.8945646  |
| Car11       | 206.978252 | 0.06278545 | 0.36105445 | 0.17389469 | 0.86194823 | 0.94622031 |
| Gtpbp6      | 1643.29675 | 0.06272932 | 0.23589058 | 0.2659255  | 0.79029658 | 0.91812832 |
| Cpt2        | 1387.39327 | 0.06271036 | 0.20323978 | 0.30855357 | 0.75766115 | 0.90307174 |
| Ak8         | 59.3813345 | 0.06269598 | 0.36093711 | 0.17370334 | 0.86209861 | 0.9462518  |
| Topors      | 10022.6253 | 0.06263296 | 0.18586427 | 0.33698223 | 0.7361303  | 0.89371241 |
| Galnt11     | 2995.405   | 0.0625657  | 0.32243155 | 0.19404336 | 0.84614193 | 0.94147896 |
| Ufm1        | 2480.34526 | 0.0625406  | 0.18359824 | 0.34063835 | 0.73337585 | 0.892514   |
| Noa1        | 1667.89457 | 0.06251732 | 0.19456835 | 0.32131288 | 0.7479733  | 0.90056773 |
| Gm8234      | 1.91289149 | 0.06250414 | 0.31421653 | 0.1989206  | 0.84232486 | NA         |
| 2610020H08I | 803.901625 | 0.06249358 | 0.23363648 | 0.26748211 | 0.78909798 | 0.9176148  |
| Itih2       | 1.58150936 | 0.0624134  | 0.29746149 | 0.20982009 | 0.83380809 | NA         |
| Pex12       | 1201.31354 | 0.06231028 | 0.22191628 | 0.28078281 | 0.77887699 | 0.9124802  |
| Snx12       | 2428.1722  | 0.06226666 | 0.16185524 | 0.38470588 | 0.70045534 | 0.87785127 |
| Afap1l2     | 369.951993 | 0.06226556 | 0.30869948 | 0.20170285 | 0.84014903 | 0.93906114 |
| Fam71e2     | 0.60771124 | 0.06226373 | 0.17781176 | 0.35016656 | 0.7262137  | NA         |
| 4930509K18F | 0.60771124 | 0.06226373 | 0.17781176 | 0.35016656 | 0.7262137  | NA         |
| Pou3f2      | 29.9843581 | 0.06219555 | 0.4139841  | 0.15023658 | 0.88057797 | 0.95454259 |
| Pdhx        | 3091.30819 | 0.06203551 | 0.17702115 | 0.35044121 | 0.7260076  | 0.88936235 |
| Apol7b      | 3.29389177 | 0.0620045  | 0.30460439 | 0.20355749 | 0.83869932 | NA         |

|             |            |            |            |            |            |            |
|-------------|------------|------------|------------|------------|------------|------------|
| Kif16b      | 2796.74143 | 0.06200295 | 0.1982634  | 0.31273017 | 0.75448567 | 0.90191816 |
| Pcdhac2     | 5.78294225 | 0.0619693  | 0.35657225 | 0.1737917  | 0.86202917 | NA         |
| Ms4a7       | 0.66204789 | 0.06196145 | 0.18117713 | 0.34199375 | 0.7323556  | NA         |
| Vmn2r30     | 0.66204789 | 0.06196145 | 0.18117713 | 0.34199375 | 0.7323556  | NA         |
| Tmem109     | 963.169617 | 0.06194654 | 0.26693061 | 0.23206981 | 0.8164838  | 0.92985634 |
| Pcdhb7      | 1.02228964 | 0.06190954 | 0.23266269 | 0.26609141 | 0.79016881 | NA         |
| Otoa        | 1.02228964 | 0.06190954 | 0.23266269 | 0.26609141 | 0.79016881 | NA         |
| Ubr2        | 4990.6343  | 0.06185491 | 0.20560293 | 0.30084647 | 0.76353157 | 0.90535109 |
| Plxnb2      | 9996.84639 | 0.06184514 | 0.26905982 | 0.22985648 | 0.8182033  | 0.93032296 |
| Cpsf4       | 4880.42165 | 0.06177688 | 0.19030906 | 0.32461345 | 0.74547365 | 0.89871411 |
| Fabp4       | 1.50802005 | 0.06176218 | 0.22389903 | 0.27584837 | 0.78266453 | NA         |
| Scnm1       | 1844.11872 | 0.06172471 | 0.21349351 | 0.2891175  | 0.77249146 | 0.90959451 |
| Mrpl4       | 3722.36496 | 0.0616844  | 0.19702605 | 0.3130774  | 0.75422186 | 0.90191816 |
| Foxo3       | 2274.35794 | 0.06168137 | 0.28171396 | 0.21895034 | 0.82668873 | 0.93181174 |
| Sf1         | 20043.2494 | 0.06158761 | 0.20292591 | 0.30349799 | 0.76151038 | 0.90466935 |
| 2700086A05f | 0.6005555  | 0.06149218 | 0.17769965 | 0.34604558 | 0.72930846 | NA         |
| 4930483O08l | 0.6005555  | 0.06149218 | 0.17769965 | 0.34604558 | 0.72930846 | NA         |
| Spp2        | 0.6005555  | 0.06149218 | 0.17769965 | 0.34604558 | 0.72930846 | NA         |
| Sorcs1      | 0.6005555  | 0.06149218 | 0.17769965 | 0.34604558 | 0.72930846 | NA         |
| Cldn22      | 0.6005555  | 0.06149218 | 0.17769965 | 0.34604558 | 0.72930846 | NA         |
| Cacng2      | 0.6005555  | 0.06149218 | 0.17769965 | 0.34604558 | 0.72930846 | NA         |
| Spata5l1    | 231.51288  | 0.061471   | 0.31654301 | 0.19419478 | 0.84602337 | 0.94147896 |
| Otos        | 2.50802421 | 0.06146693 | 0.28344146 | 0.21685935 | 0.82831796 | NA         |
| Arpc4       | 6498.50689 | 0.06129226 | 0.18780221 | 0.32636604 | 0.74414743 | 0.89795494 |
| Nkain1      | 4595.93844 | 0.06116514 | 0.24714189 | 0.24748998 | 0.80452905 | 0.92394305 |
| Mageh1      | 574.77786  | 0.06114204 | 0.21222728 | 0.28809697 | 0.77327252 | 0.90982529 |
| Gtsf1l      | 3579.69064 | 0.06110465 | 0.23443462 | 0.26064688 | 0.79436484 | 0.91975523 |
| Tmem238     | 243.289575 | 0.06109639 | 0.23398067 | 0.26111725 | 0.79400209 | 0.91975523 |
| Rpe         | 11504.564  | 0.06098681 | 0.30649896 | 0.19897885 | 0.84227929 | 0.93995588 |
| Leap2       | 0.92176349 | 0.06091518 | 0.22805863 | 0.26710317 | 0.78938973 | NA         |
| Gm10373     | 0.66920363 | 0.06088623 | 0.17873559 | 0.34064971 | 0.7333673  | NA         |
| Foxb1       | 0.66920363 | 0.06088623 | 0.17873559 | 0.34064971 | 0.7333673  | NA         |
| Pcnt        | 12824.6973 | 0.06087276 | 0.26675064 | 0.22820098 | 0.81949    | 0.93046822 |
| Xndc1       | 937.988146 | 0.06076266 | 0.19103834 | 0.31806526 | 0.75043544 | 0.90095125 |
| 1110008L16F | 2785.46218 | 0.06073989 | 0.17392235 | 0.34923565 | 0.72691241 | 0.88950684 |
| Cbfb        | 8632.58422 | 0.06070788 | 0.20362004 | 0.29814294 | 0.76559407 | 0.90618168 |
| Wee2        | 0.96355031 | 0.0607077  | 0.23240974 | 0.26120977 | 0.79393074 | NA         |
| Mir7027     | 0.96355031 | 0.0607077  | 0.23240974 | 0.26120977 | 0.79393074 | NA         |
| 1810022K09F | 3320.99943 | 0.06067749 | 0.22781932 | 0.26634039 | 0.78997707 | 0.91808784 |
| Ppp1r27     | 4.02513474 | 0.06063749 | 0.38485567 | 0.15755903 | 0.87480429 | NA         |
| Mthfs       | 179.177596 | 0.06062092 | 0.25483761 | 0.2378806  | 0.8119737  | 0.92859267 |

|             |            |            |            |            |            |            |
|-------------|------------|------------|------------|------------|------------|------------|
| Gprc5c      | 893.87881  | 0.06058187 | 0.22596734 | 0.26810013 | 0.78862224 | 0.91726735 |
| Smim19      | 511.459074 | 0.06045474 | 0.26819411 | 0.22541412 | 0.82165713 | 0.93076517 |
| 2810403A07f | 6178.53953 | 0.06043123 | 0.19748551 | 0.30600337 | 0.75960208 | 0.90393112 |
| Gpr89       | 1339.88432 | 0.06041421 | 0.16012227 | 0.37730049 | 0.70595031 | 0.88029104 |
| Tgif2       | 2935.86143 | 0.06033842 | 0.17466381 | 0.34545464 | 0.72975261 | 0.89048829 |
| Add3        | 4588.5219  | 0.06025623 | 0.19763443 | 0.30488732 | 0.76045197 | 0.90431969 |
| Larp7       | 9149.90264 | 0.06024951 | 0.1739741  | 0.3463131  | 0.72910742 | 0.89032067 |
| Lrp12       | 1283.21373 | 0.06021783 | 0.21554154 | 0.27937924 | 0.7799538  | 0.9129892  |
| Setd3       | 5744.20864 | 0.06016958 | 0.14527332 | 0.41418193 | 0.67874087 | 0.86604267 |
| Defb25      | 0.58800567 | 0.06008857 | 0.17749535 | 0.33853603 | 0.73495928 | NA         |
| Rps19-ps3   | 41.3672125 | 0.06008816 | 0.35876693 | 0.16748523 | 0.86698827 | 0.94870504 |
| Opn4        | 13.1490313 | 0.06001433 | 0.43107694 | 0.13921954 | 0.88927667 | 0.95789578 |
| Gpr149      | 0.64949806 | 0.05999592 | 0.18014963 | 0.33303381 | 0.73910876 | NA         |
| A230073K19f | 1.80917377 | 0.05995143 | 0.2316794  | 0.25876893 | 0.79581353 | NA         |
| Sla2        | 4.35387586 | 0.05992349 | 0.38981523 | 0.15372281 | 0.8778283  | NA         |
| Taf10       | 4937.54499 | 0.05991254 | 0.20776146 | 0.28837175 | 0.77306219 | 0.90964665 |
| Zfp949      | 753.582723 | 0.05986342 | 0.17352352 | 0.34498737 | 0.73010386 | 0.89067944 |
| Ntrk2       | 26.1836684 | 0.0597586  | 0.40714359 | 0.14677524 | 0.88330943 | 0.95568774 |
| Degs1       | 8635.00305 | 0.05970302 | 0.14551325 | 0.41029265 | 0.68159128 | 0.86734737 |
| Ern1        | 493.60131  | 0.05968921 | 0.30208175 | 0.19759291 | 0.84336358 | 0.94064184 |
| Tmem132a    | 1185.02665 | 0.05960698 | 0.2708542  | 0.22007034 | 0.82581637 | 0.93152509 |
| Grpel1      | 7938.84679 | 0.05959053 | 0.17086736 | 0.34875315 | 0.72727464 | 0.88975993 |
| Rgs9bp      | 364.054894 | 0.05957588 | 0.2906457  | 0.20497767 | 0.83758957 | 0.93751696 |
| F7          | 7.28847891 | 0.05952158 | 0.39768242 | 0.14967114 | 0.88102408 | 0.9546085  |
| Ier3ip1     | 5087.70932 | 0.0594624  | 0.19587437 | 0.30357416 | 0.76145234 | 0.90466935 |
| BC018507    | 9290.69128 | 0.05945943 | 0.23504051 | 0.25297522 | 0.80028736 | 0.92264456 |
| Prdx6b      | 1.21851454 | 0.05940943 | 0.24611016 | 0.24139365 | 0.80925004 | NA         |
| Pnpla2      | 1626.99394 | 0.05932565 | 0.1696722  | 0.3496486  | 0.72660243 | 0.88950597 |
| Elmsan1     | 3024.98286 | 0.05931769 | 0.27166013 | 0.21835257 | 0.82715442 | 0.93197206 |
| Sec22b      | 3842.17866 | 0.05930678 | 0.17273925 | 0.34333126 | 0.73134926 | 0.89152719 |
| Cops6       | 11954.1035 | 0.05928351 | 0.18382103 | 0.32250669 | 0.74706887 | 0.89975744 |
| Rbbp5       | 8868.66419 | 0.0592601  | 0.19303983 | 0.30698379 | 0.75885571 | 0.90331943 |
| Klhdc2      | 3206.63923 | 0.05918411 | 0.22484915 | 0.26321698 | 0.79238335 | 0.918989   |
| Dap3        | 9127.8323  | 0.05915183 | 0.19031529 | 0.31080963 | 0.75594535 | 0.90213384 |
| Tdh         | 45838.0644 | 0.05910282 | 0.23596844 | 0.25046919 | 0.80222453 | 0.92349342 |
| Hsbp1       | 5918.13086 | 0.05908895 | 0.16652639 | 0.35483234 | 0.7227152  | 0.88757986 |
| Fdx1        | 1011.00037 | 0.05903419 | 0.18935287 | 0.31176811 | 0.75521676 | 0.90191816 |
| Gab1        | 19454.9513 | 0.05899403 | 0.26617594 | 0.22163549 | 0.82459766 | 0.93107393 |
| Ube4b       | 9748.53916 | 0.05893591 | 0.21931765 | 0.26872398 | 0.78814209 | 0.91705183 |
| Ylpm1       | 4612.20391 | 0.05892652 | 0.25656054 | 0.22967881 | 0.81834136 | 0.93032688 |
| Gm11549     | 4.40396605 | 0.05885341 | 0.37204016 | 0.15819102 | 0.87430628 | NA         |

|             |            |            |            |            |            |            |
|-------------|------------|------------|------------|------------|------------|------------|
| Abi3bp      | 1.53450397 | 0.05885131 | 0.22306608 | 0.26382903 | 0.79191166 | NA         |
| Pogz        | 6047.39426 | 0.05869117 | 0.22507435 | 0.26076348 | 0.79427491 | 0.91975523 |
| 1700016L04F | 0.64773641 | 0.05865199 | 0.17843609 | 0.32870029 | 0.74238224 | NA         |
| Oaz3        | 0.64773641 | 0.05865199 | 0.17843609 | 0.32870029 | 0.74238224 | NA         |
| Mir3067     | 0.64773641 | 0.05865199 | 0.17843609 | 0.32870029 | 0.74238224 | NA         |
| Etohd2      | 17.6088487 | 0.05862453 | 0.42224567 | 0.13883986 | 0.8895767  | 0.95801989 |
| Eif2b2      | 3460.89553 | 0.05855749 | 0.19639654 | 0.29815946 | 0.76558146 | 0.90618168 |
| Prickle3    | 399.101876 | 0.05853428 | 0.28381887 | 0.20623817 | 0.83660488 | 0.93698697 |
| Snord52     | 177.093464 | 0.05848056 | 0.26082863 | 0.22421065 | 0.8225934  | 0.93107393 |
| C1qtnf3     | 1.45605908 | 0.05846873 | 0.22669035 | 0.25792334 | 0.79646607 | NA         |
| Slc39a9     | 2800.4168  | 0.05846772 | 0.17831533 | 0.32788948 | 0.74299523 | 0.89721376 |
| Galr2       | 36.8824608 | 0.05834974 | 0.39765091 | 0.1467361  | 0.88334032 | 0.95568774 |
| Mrps2       | 9236.18738 | 0.05832438 | 0.17645043 | 0.3305426  | 0.74099001 | 0.89611444 |
| Aldh2       | 12000.7537 | 0.05817985 | 0.21365927 | 0.27230203 | 0.78538979 | 0.91545082 |
| Klhl14      | 0.68137607 | 0.05805878 | 0.182446   | 0.31822448 | 0.75031466 | NA         |
| Tnfsf18     | 0.68137607 | 0.05805878 | 0.182446   | 0.31822448 | 0.75031466 | NA         |
| Wdr13       | 1105.3459  | 0.05801004 | 0.19294812 | 0.30065096 | 0.76368067 | 0.90545883 |
| Tm6sf1      | 229.573771 | 0.0579613  | 0.34544335 | 0.16778816 | 0.86674994 | 0.94861203 |
| Ube4a       | 3869.81737 | 0.05788194 | 0.23211674 | 0.24936564 | 0.80307796 | 0.92352256 |
| 9530027J09R | 21.1089449 | 0.05785566 | 0.42162703 | 0.13722    | 0.8908569  | 0.95846933 |
| Cep104      | 1466.4406  | 0.0578287  | 0.21084827 | 0.27426687 | 0.78387954 | 0.91455554 |
| Spcs1       | 4639.23629 | 0.05782096 | 0.18905481 | 0.30584232 | 0.7597247  | 0.9039387  |
| Myl10       | 0.99003424 | 0.0577549  | 0.23356131 | 0.24727937 | 0.80469202 | NA         |
| Cyp24a1     | 0.99003424 | 0.0577549  | 0.23356131 | 0.24727937 | 0.80469202 | NA         |
| Clec3a      | 0.63518658 | 0.05775225 | 0.17893993 | 0.3227466  | 0.74688716 | NA         |
| Lrmp        | 1169.21456 | 0.05768587 | 0.26975289 | 0.21384708 | 0.83066631 | 0.9337556  |
| Ormdl1      | 1934.87084 | 0.05766775 | 0.16331638 | 0.35310453 | 0.72401008 | 0.88829071 |
| Grp         | 0.9516432  | 0.05763869 | 0.20262783 | 0.28445594 | 0.77606099 | NA         |
| Psm4        | 14159.6695 | 0.05763439 | 0.19482362 | 0.29582855 | 0.76736102 | 0.90649963 |
| Ndufb4      | 1029.51928 | 0.0576228  | 0.25773825 | 0.22357102 | 0.82309111 | 0.93107393 |
| Psm3        | 15364.8857 | 0.0575212  | 0.16103414 | 0.35719881 | 0.72094298 | 0.88656328 |
| Sec61b      | 4343.42945 | 0.05741638 | 0.20053232 | 0.28631985 | 0.77463316 | 0.91018664 |
| Plscr1      | 2803.34547 | 0.05740893 | 0.19892679 | 0.28859327 | 0.77289265 | 0.90962818 |
| Atp5j2      | 15453.2794 | 0.0573396  | 0.21969312 | 0.26099864 | 0.79409356 | 0.91975523 |
| Chek2       | 6106.80442 | 0.0573379  | 0.16416086 | 0.34927877 | 0.72688003 | 0.88950684 |
| Fam78b      | 18.9457966 | 0.05732752 | 0.43223036 | 0.13263186 | 0.89448453 | 0.96024637 |
| Akr1c19     | 1.30924393 | 0.05724581 | 0.24784719 | 0.2309722  | 0.8173364  | NA         |
| Mir1967     | 1.30924393 | 0.05724581 | 0.24784719 | 0.2309722  | 0.8173364  | NA         |
| Oas1g       | 670.167192 | 0.05723018 | 0.2818826  | 0.20302842 | 0.83911282 | 0.93837763 |
| Tor1aip2    | 16326.1342 | 0.05721911 | 0.15147243 | 0.37775261 | 0.70561438 | 0.87995263 |
| Cramp1l     | 2468.31966 | 0.05718236 | 0.24785661 | 0.23070741 | 0.81754212 | 0.93024054 |

|             |            |            |            |            |            |            |
|-------------|------------|------------|------------|------------|------------|------------|
| Mat2a       | 25124.2959 | 0.05709971 | 0.15558671 | 0.36699608 | 0.71362194 | 0.88418475 |
| Mageb18     | 3.62085801 | 0.05702375 | 0.36525392 | 0.15612083 | 0.87593778 | NA         |
| Trpm1       | 5474.74166 | 0.05698321 | 0.30064334 | 0.18953756 | 0.84967152 | 0.94277489 |
| Dfnb59      | 1.44714169 | 0.05698031 | 0.22555326 | 0.25262465 | 0.80055828 | NA         |
| Tpst1       | 3271.17852 | 0.05696948 | 0.16440441 | 0.3465204  | 0.72895165 | 0.89031153 |
| Jade2       | 827.37051  | 0.05691986 | 0.31412908 | 0.18119894 | 0.85621143 | 0.94485835 |
| Gm2011      | 0.62979249 | 0.05687829 | 0.17847512 | 0.3186903  | 0.74996137 | NA         |
| Hotair      | 0.62979249 | 0.05687829 | 0.17847512 | 0.3186903  | 0.74996137 | NA         |
| Siglech     | 0.62979249 | 0.05687829 | 0.17847512 | 0.3186903  | 0.74996137 | NA         |
| Cym         | 0.62979249 | 0.05687829 | 0.17847512 | 0.3186903  | 0.74996137 | NA         |
| Map3k7      | 7567.51037 | 0.05677969 | 0.20930676 | 0.271275   | 0.78617953 | 0.9157961  |
| Nkx2-2      | 1.28678529 | 0.05677076 | 0.25096094 | 0.22621353 | 0.82103535 | NA         |
| Nans        | 5995.45599 | 0.05676159 | 0.18992919 | 0.29885659 | 0.76504947 | 0.90610594 |
| Trmt1l      | 2395.84403 | 0.05672956 | 0.25132843 | 0.22571881 | 0.82142013 | 0.93076517 |
| Garem       | 626.239697 | 0.05668873 | 0.28028954 | 0.2022506  | 0.83972082 | 0.93885243 |
| Dennd6b     | 789.077168 | 0.05665154 | 0.20362085 | 0.27822075 | 0.78084291 | 0.91313641 |
| Fkbp1a      | 15461.7243 | 0.05659726 | 0.15972916 | 0.35433264 | 0.72308961 | 0.88765129 |
| Gm10658     | 178.877158 | 0.05653166 | 0.26361988 | 0.21444386 | 0.83020094 | 0.93357834 |
| Ssxb6       | 0.68853182 | 0.05643508 | 0.17900263 | 0.31527513 | 0.75255277 | NA         |
| Alkbh2      | 1551.05447 | 0.05640302 | 0.19751302 | 0.28556609 | 0.77521048 | 0.91029675 |
| Zmym1       | 10272.5275 | 0.05638358 | 0.1962265  | 0.28733926 | 0.77385257 | 0.9098882  |
| Upf2        | 6708.7771  | 0.05636127 | 0.1768935  | 0.31861697 | 0.75001698 | 0.90092664 |
| Blk         | 0.98827258 | 0.05616684 | 0.23107179 | 0.24307095 | 0.80795043 | NA         |
| Sema4d      | 3010.58314 | 0.05616429 | 0.22372909 | 0.25103705 | 0.80178546 | 0.92325551 |
| Slitrk2     | 0.66882625 | 0.05610428 | 0.18144738 | 0.30920412 | 0.75716626 | NA         |
| Immp1l      | 843.927629 | 0.05607896 | 0.24124551 | 0.23245598 | 0.81618387 | 0.92977579 |
| Gbp10       | 1.55383216 | 0.05606681 | 0.22344116 | 0.25092428 | 0.80187265 | NA         |
| Mmrn2       | 1777.64617 | 0.05606551 | 0.19332375 | 0.29000837 | 0.77180984 | 0.90920497 |
| Mzt2        | 1114.12353 | 0.05606471 | 0.21756655 | 0.25768994 | 0.79664621 | 0.92070321 |
| Gpatch2l    | 1675.51804 | 0.05603316 | 0.1878688  | 0.29825686 | 0.76550712 | 0.90618168 |
| Pgrmc2      | 3493.64786 | 0.05595699 | 0.18422268 | 0.30374646 | 0.76132106 | 0.90466935 |
| Itm2a       | 1884.57598 | 0.05595287 | 0.15587307 | 0.35896431 | 0.71962179 | 0.88592422 |
| Rnf24       | 1100.4684  | 0.0558812  | 0.26296112 | 0.21250745 | 0.83171117 | 0.93433074 |
| H2-M10.2    | 0.62263675 | 0.05588033 | 0.17806219 | 0.31382478 | 0.75365413 | NA         |
| Sema3g      | 12.5636922 | 0.05586481 | 0.43191725 | 0.12934146 | 0.89708747 | 0.96146636 |
| A930001A20l | 0.94624912 | 0.05582102 | 0.2005181  | 0.27838397 | 0.78071762 | NA         |
| Grifin      | 1.64978011 | 0.05578136 | 0.29336164 | 0.19014538 | 0.84919521 | NA         |
| Tyrp1       | 1.60599498 | 0.05574148 | 0.25855476 | 0.21558867 | 0.82930839 | NA         |
| Hist1h2bl   | 1.68705221 | 0.05562226 | 0.29536925 | 0.18831433 | 0.85063025 | NA         |
| Zmat2       | 10159.2332 | 0.05547386 | 0.18404191 | 0.30141975 | 0.76309444 | 0.90522666 |
| Ammeocr1    | 1140.47148 | 0.05546421 | 0.29481109 | 0.18813476 | 0.85077101 | 0.94332734 |



|              |            |            |            |            |            |            |
|--------------|------------|------------|------------|------------|------------|------------|
| Taf4a        | 3265.75279 | 0.05543546 | 0.22342108 | 0.24812098 | 0.80404081 | 0.92388669 |
| Aamp         | 9600.17726 | 0.05538931 | 0.18771852 | 0.29506576 | 0.76794364 | 0.90649963 |
| Cdh4         | 433.966123 | 0.05534775 | 0.41929387 | 0.13200228 | 0.89498249 | 0.96038316 |
| Mir7024      | 0.97572275 | 0.0552647  | 0.23285711 | 0.2373331  | 0.81239838 | NA         |
| 1700019N19I  | 0.97572275 | 0.0552647  | 0.23285711 | 0.2373331  | 0.81239838 | NA         |
| Ddx31        | 1562.97088 | 0.05526354 | 0.18602717 | 0.29707242 | 0.76641122 | 0.90621355 |
| Chordc1      | 8995.00242 | 0.05523023 | 0.15073672 | 0.36640197 | 0.71406515 | 0.88425449 |
| Rragc        | 3072.80606 | 0.05518939 | 0.18226021 | 0.30280546 | 0.76203812 | 0.9048709  |
| Clec14a      | 5.55306154 | 0.05512035 | 0.39733036 | 0.13872674 | 0.88966609 | NA         |
| Mettl15      | 536.24739  | 0.0550862  | 0.23010246 | 0.23939856 | 0.81079655 | 0.92765576 |
| Hat1         | 40328.1801 | 0.05506197 | 0.15337592 | 0.3590001  | 0.71959501 | 0.88592422 |
| Paip2b       | 11941.3099 | 0.05503539 | 0.15512052 | 0.35479116 | 0.72274605 | 0.88757986 |
| Pla2g6       | 2594.249   | 0.05494283 | 0.19907182 | 0.27599504 | 0.78255187 | 0.91393614 |
| Rpl41        | 37352.7691 | 0.05492709 | 0.24965116 | 0.22001535 | 0.8258592  | 0.93152509 |
| Rnf187       | 6554.01659 | 0.05492076 | 0.16377466 | 0.33534348 | 0.737366   | 0.8940958  |
| Unc119b      | 5115.82788 | 0.0548188  | 0.17573158 | 0.31194621 | 0.7550814  | 0.90191816 |
| Ecsit        | 2190.00948 | 0.05480147 | 0.19959339 | 0.27456555 | 0.78365003 | 0.91442498 |
| Zdhhc3       | 3248.29818 | 0.05470816 | 0.19426397 | 0.28161765 | 0.7782367  | 0.91216552 |
| Hbq1a        | 3.94030434 | 0.05453873 | 0.38425703 | 0.14193294 | 0.88713298 | NA         |
| Znhit3       | 2411.49808 | 0.05450573 | 0.18730465 | 0.2910004  | 0.77105101 | 0.90875167 |
| Lamc1        | 45495.4498 | 0.05442467 | 0.23970017 | 0.22705311 | 0.82038245 | 0.930536   |
| B230112J18R  | 1.59643487 | 0.05441302 | 0.29389401 | 0.18514504 | 0.85311528 | NA         |
| D330050G23   | 1.59643487 | 0.05441302 | 0.29389401 | 0.18514504 | 0.85311528 | NA         |
| Gm14827      | 4.96721715 | 0.05440754 | 0.40594606 | 0.13402653 | 0.8933816  | NA         |
| 4933405D12I  | 4.6516338  | 0.05436582 | 0.40205672 | 0.13521928 | 0.8924385  | NA         |
| Tmem261      | 1894.85075 | 0.05422238 | 0.18860992 | 0.28748422 | 0.77374158 | 0.9098882  |
| 4632428C04F  | 36.4969171 | 0.05422057 | 0.42083305 | 0.12884104 | 0.89748343 | 0.96153958 |
| Dut          | 19318.1195 | 0.05416704 | 0.30587615 | 0.17708815 | 0.85943915 | 0.9455234  |
| Slc25a11     | 4676.26941 | 0.05409817 | 0.16212342 | 0.33368511 | 0.73861718 | 0.89470602 |
| Mlycd        | 430.341838 | 0.05409317 | 0.28070642 | 0.19270373 | 0.84719101 | 0.94147896 |
| Flrt2        | 656.124429 | 0.05409247 | 0.3108552  | 0.1740118  | 0.86185619 | 0.94622031 |
| Szt2         | 2654.02193 | 0.05407667 | 0.24537382 | 0.22038486 | 0.82557144 | 0.93152509 |
| Rnf14        | 3831.32145 | 0.05400683 | 0.16592085 | 0.32549752 | 0.74480456 | 0.89836205 |
| Ggnbp1       | 396.544901 | 0.05398867 | 0.28392534 | 0.19015094 | 0.84919085 | 0.94246124 |
| Pou3f3os     | 1.58652606 | 0.05394268 | 0.29374182 | 0.18363976 | 0.85429607 | NA         |
| Mir6986      | 0.65451476 | 0.05387837 | 0.18028827 | 0.29884569 | 0.76505778 | NA         |
| Marcksl1-ps4 | 0.65451476 | 0.05387837 | 0.18028827 | 0.29884569 | 0.76505778 | NA         |
| Shisa9       | 0.65451476 | 0.05387837 | 0.18028827 | 0.29884569 | 0.76505778 | NA         |
| Hp           | 0.65451476 | 0.05387837 | 0.18028827 | 0.29884569 | 0.76505778 | NA         |
| Ivd          | 2490.30197 | 0.05381231 | 0.17765946 | 0.30289582 | 0.76196926 | 0.9048709  |
| H60c         | 1.92242292 | 0.05378115 | 0.31009531 | 0.17343425 | 0.86231011 | NA         |

|             |            |            |            |            |            |            |
|-------------|------------|------------|------------|------------|------------|------------|
| Skap2       | 6165.74871 | 0.05370609 | 0.17104492 | 0.31398822 | 0.75352999 | 0.90191816 |
| Tmem246     | 26.4808776 | 0.05369617 | 0.41997686 | 0.12785506 | 0.89826367 | 0.96162064 |
| Slx4ip      | 706.438133 | 0.05363272 | 0.27410365 | 0.19566582 | 0.84487174 | 0.94132069 |
| Otud3       | 704.615346 | 0.05362565 | 0.22573696 | 0.23755813 | 0.81222383 | 0.92867383 |
| Nop9        | 5549.36113 | 0.05356815 | 0.18309447 | 0.29257111 | 0.76985    | 0.90806564 |
| Dct         | 3.25811306 | 0.05346068 | 0.29291838 | 0.1825105  | 0.85518211 | NA         |
| Rnf113a1    | 453.035025 | 0.05332398 | 0.23305773 | 0.22880158 | 0.81902314 | 0.93036217 |
| Rn45s       | 58787.3126 | 0.05321804 | 0.23968511 | 0.22203316 | 0.82428807 | 0.93107393 |
| Pabpc1      | 125449.726 | 0.05320249 | 0.19159459 | 0.2776826  | 0.78125602 | 0.91334478 |
| BC021767    | 34.4538146 | 0.05317593 | 0.41427056 | 0.12836038 | 0.89786378 | 0.96161706 |
| 1700020M21  | 0.98803594 | 0.05317459 | 0.20010445 | 0.26573416 | 0.79044395 | NA         |
| Pcnxl3      | 4162.7772  | 0.05314191 | 0.23417313 | 0.22693426 | 0.82047486 | 0.930536   |
| Spsb1       | 1042.91678 | 0.05312154 | 0.33920024 | 0.15660819 | 0.87555365 | 0.95264507 |
| Gpr137b-ps  | 106.993863 | 0.05309491 | 0.31416446 | 0.16900354 | 0.86579385 | 0.94809945 |
| 5430419D17I | 0.97032867 | 0.05302985 | 0.23019747 | 0.23036678 | 0.81780677 | NA         |
| Proc        | 57.3171009 | 0.05300685 | 0.35902964 | 0.14763919 | 0.88262752 | 0.95554672 |
| Ercc3       | 4366.14148 | 0.05293522 | 0.1943503  | 0.27237014 | 0.78533743 | 0.91545082 |
| Tatdn1      | 702.96743  | 0.05291255 | 0.2107141  | 0.25111064 | 0.80172857 | 0.92325551 |
| Kpna6       | 11626.9699 | 0.05288379 | 0.16306465 | 0.32431182 | 0.74570198 | 0.89887694 |
| Kmt2b       | 9128.86356 | 0.05282569 | 0.23841537 | 0.22157    | 0.82464864 | 0.93107393 |
| Slc27a1     | 1631.54677 | 0.05278538 | 0.19176565 | 0.27525984 | 0.78311662 | 0.91408074 |
| Mtrf1l      | 660.286634 | 0.05276655 | 0.23912085 | 0.22066896 | 0.82535021 | 0.93152509 |
| Fig4        | 10392.0218 | 0.05267375 | 0.22162465 | 0.23767098 | 0.81213629 | 0.92864202 |
| Grm6        | 1.93737712 | 0.05266224 | 0.26698528 | 0.19724772 | 0.84363369 | NA         |
| Pdia4       | 18104.3556 | 0.0526372  | 0.17629655 | 0.29857192 | 0.76526669 | 0.90610594 |
| Alg12       | 695.348834 | 0.05255725 | 0.189548   | 0.27727671 | 0.78156764 | 0.91337854 |
| Cnnm4       | 386.898951 | 0.05255386 | 0.2814397  | 0.18673221 | 0.8518706  | 0.94377272 |
| 9430091E24F | 13.8451889 | 0.05254301 | 0.43068222 | 0.12199947 | 0.90289943 | 0.96309686 |
| 4931406C07F | 1669.52937 | 0.05253189 | 0.16494717 | 0.31847703 | 0.75012311 | 0.90092664 |
| Rhbdl2      | 84.0520988 | 0.05239699 | 0.36010446 | 0.14550497 | 0.88431219 | 0.95575952 |
| Crybb1      | 1.00220668 | 0.05236883 | 0.23398236 | 0.22381531 | 0.82290102 | NA         |
| Susd1       | 1933.14798 | 0.05233837 | 0.3615015  | 0.14478051 | 0.88488417 | 0.95578308 |
| Echdc2      | 8792.46155 | 0.05232369 | 0.28930637 | 0.18085911 | 0.85647817 | 0.9448845  |
| Snord15b    | 55.6640803 | 0.0523056  | 0.36922946 | 0.1416615  | 0.88734739 | 0.95687535 |
| Aldh4a1     | 3845.0058  | 0.05226651 | 0.2005112  | 0.26066628 | 0.79434987 | 0.91975523 |
| Slx4        | 2726.64228 | 0.05222954 | 0.21415897 | 0.24388208 | 0.80732215 | 0.9258757  |
| Ern2        | 2.23409948 | 0.05214905 | 0.32633797 | 0.15980075 | 0.87303803 | NA         |
| Trappc3l    | 0.91223206 | 0.05210901 | 0.20041536 | 0.26000507 | 0.79485986 | NA         |
| Scyl3       | 1940.4665  | 0.05207385 | 0.16644416 | 0.31286076 | 0.75438645 | 0.90191816 |
| Polr1a      | 12431.6893 | 0.05206414 | 0.23152981 | 0.22487015 | 0.82208029 | 0.93084102 |
| Slc6a4      | 2.88393654 | 0.05203971 | 0.36731909 | 0.1416744  | 0.8873372  | NA         |

|          |            |            |            |            |            |            |
|----------|------------|------------|------------|------------|------------|------------|
| Rc3h1    | 2638.89393 | 0.05203142 | 0.22358656 | 0.23271263 | 0.81598456 | 0.92967334 |
| Mir7666  | 2.26835318 | 0.05201406 | 0.35189586 | 0.14781096 | 0.88249196 | NA         |
| Coro1c   | 12951.8764 | 0.05194096 | 0.2000086  | 0.25969364 | 0.7951001  | 0.91998524 |
| Sowahd   | 0.64196493 | 0.05188133 | 0.17923896 | 0.28945343 | 0.77223441 | NA         |
| Klhdc7b  | 0.64196493 | 0.05188133 | 0.17923896 | 0.28945343 | 0.77223441 | NA         |
| Tshb     | 0.64196493 | 0.05188133 | 0.17923896 | 0.28945343 | 0.77223441 | NA         |
| Rabgap1l | 1209.55019 | 0.05181057 | 0.26640386 | 0.19448132 | 0.84579902 | 0.94147896 |
| Clca3    | 5.16870253 | 0.05178154 | 0.36184716 | 0.14310335 | 0.88620856 | NA         |
| Trim63   | 633.601949 | 0.05169794 | 0.3053637  | 0.16929955 | 0.86556103 | 0.94808387 |
| Osbp11   | 3267.27831 | 0.05168244 | 0.20234684 | 0.25541511 | 0.7984025  | 0.92164102 |
| Rfx1     | 1083.9841  | 0.05166213 | 0.27454029 | 0.18817688 | 0.850738   | 0.94332734 |
| Upb1     | 104.676682 | 0.051577   | 0.42127585 | 0.12243047 | 0.90255811 | 0.96299699 |
| Bid      | 5767.24544 | 0.05148442 | 0.153334   | 0.33576652 | 0.73704694 | 0.89391803 |
| Hoxb2    | 5.34664092 | 0.05145974 | 0.35503258 | 0.14494372 | 0.88475531 | NA         |
| Mtx2     | 4359.85445 | 0.05138897 | 0.23204141 | 0.22146466 | 0.82473065 | 0.93107393 |
| Stoml3   | 1.67009971 | 0.05135753 | 0.29506132 | 0.17405714 | 0.86182056 | NA         |
| BC037032 | 2.19909101 | 0.05125321 | 0.33686924 | 0.15214572 | 0.87907201 | NA         |
| Ints12   | 2871.87946 | 0.05114529 | 0.15610494 | 0.32763404 | 0.74318838 | 0.89737732 |
| Nt5dc1   | 1629.65764 | 0.05111873 | 0.20077217 | 0.25461063 | 0.79902385 | 0.92171351 |
| Tmcc3    | 334.809922 | 0.0511003  | 0.39026232 | 0.13093833 | 0.89582409 | 0.96083244 |
| Foxg1    | 94.8056249 | 0.05107363 | 0.38368139 | 0.1331147  | 0.89410267 | 0.96010139 |
| Ddc      | 3301.6849  | 0.05104672 | 0.26220591 | 0.1946818  | 0.84564206 | 0.94147896 |
| Zswim3   | 1776.82266 | 0.05098593 | 0.17932248 | 0.28432539 | 0.77616103 | 0.91080372 |
| Clptm1   | 6674.35823 | 0.05083291 | 0.18246734 | 0.27858633 | 0.7805623  | 0.91308099 |
| Fbxl6    | 2581.56949 | 0.05083285 | 0.18722257 | 0.27151026 | 0.78599861 | 0.91579114 |
| Rwdd4a   | 2722.91563 | 0.05082238 | 0.18335118 | 0.27718599 | 0.78163729 | 0.91337854 |
| Ccm2l    | 3.4639035  | 0.05072156 | 0.37840537 | 0.13404027 | 0.89337073 | NA         |
| Papss1   | 1275.21266 | 0.05069169 | 0.18505651 | 0.27392548 | 0.78414189 | 0.91472437 |
| Prmt1    | 24952.5818 | 0.05054432 | 0.18061005 | 0.27985332 | 0.77959004 | 0.91283825 |
| Fbxl18   | 827.810034 | 0.05050937 | 0.26493492 | 0.19064821 | 0.84880122 | 0.94216329 |
| Bpi      | 5.9004791  | 0.0505017  | 0.40804531 | 0.12376492 | 0.90150141 | NA         |
| Ddx3y    | 3582.85244 | 0.05048    | 0.20307446 | 0.24857876 | 0.80368664 | 0.92380301 |
| Kdm5d    | 158.915825 | 0.05039708 | 0.23598232 | 0.21356294 | 0.8308879  | 0.93381064 |
| Cobl     | 13312.6084 | 0.05035913 | 0.27871114 | 0.18068574 | 0.85661425 | 0.94490057 |
| Zcrb1    | 1539.3966  | 0.05035786 | 0.22379393 | 0.2250189  | 0.82196457 | 0.93079758 |
| Pvrl2    | 5579.92366 | 0.05031676 | 0.25956914 | 0.19384724 | 0.8462955  | 0.94147896 |
| Rasgrp4  | 690.600976 | 0.05029313 | 0.19450388 | 0.25857133 | 0.79596601 | 0.92057619 |
| Gm6297   | 62.6480412 | 0.05022664 | 0.40489345 | 0.12404904 | 0.90127645 | 0.96269291 |
| Tyw1     | 3151.10404 | 0.05021182 | 0.18026037 | 0.27855164 | 0.78058893 | 0.91308099 |
| Prdx5    | 2114.53232 | 0.05002486 | 0.23089922 | 0.21665236 | 0.82847928 | 0.93256314 |
| Zfp655   | 7557.33872 | 0.05000959 | 0.21757446 | 0.22985047 | 0.81820796 | 0.93032296 |

|             |            |            |            |            |            |            |
|-------------|------------|------------|------------|------------|------------|------------|
| Car15       | 15.0823699 | 0.04978185 | 0.42822005 | 0.11625296 | 0.90745206 | 0.96495598 |
| Ttll10      | 5.92333669 | 0.04963246 | 0.42010644 | 0.11814258 | 0.90595468 | NA         |
| Zbtb18      | 1862.76647 | 0.04942722 | 0.25221207 | 0.19597483 | 0.84462987 | 0.94122816 |
| Gm17455     | 2.52633581 | 0.04942469 | 0.32112228 | 0.15391238 | 0.87767883 | NA         |
| Zfp933      | 611.938931 | 0.04940464 | 0.23397219 | 0.21115603 | 0.83276552 | 0.93498494 |
| Mir20b      | 1.31249898 | 0.04930988 | 0.24373595 | 0.20230859 | 0.83967549 | NA         |
| Slc37a3     | 4730.1662  | 0.04930161 | 0.18099405 | 0.27239354 | 0.78531944 | 0.91545082 |
| Fbxw15      | 2.60237633 | 0.04925406 | 0.34834241 | 0.14139554 | 0.88755747 | NA         |
| Mina        | 3018.49586 | 0.04922521 | 0.20728207 | 0.23747937 | 0.81228492 | 0.9286754  |
| LOC10263508 | 2.88431393 | 0.04919231 | 0.34009973 | 0.14464082 | 0.88499446 | NA         |
| Plch1       | 586.323447 | 0.04916033 | 0.29712507 | 0.16545331 | 0.8685872  | 0.9493136  |
| Wtip        | 2895.20844 | 0.04912016 | 0.21231602 | 0.23135402 | 0.81703979 | 0.93016422 |
| Man2c1os    | 10.6179445 | 0.04895761 | 0.42680669 | 0.11470676 | 0.90867756 | 0.96528757 |
| Igfbp3      | 446.087045 | 0.04894055 | 0.21066842 | 0.2323108  | 0.81629663 | 0.92977579 |
| Atp9b       | 2414.99712 | 0.04875512 | 0.17076521 | 0.28550967 | 0.77525369 | 0.91029675 |
| Lck         | 969.361035 | 0.04863574 | 0.32975398 | 0.14749098 | 0.8827445  | 0.95554672 |
| Osr2        | 387.245319 | 0.04862201 | 0.4274734  | 0.11374277 | 0.90944171 | 0.96550573 |
| Gphb5       | 1.32819473 | 0.04860385 | 0.25205146 | 0.19283303 | 0.84708973 | NA         |
| Zkscan6     | 714.612645 | 0.04855499 | 0.17305851 | 0.28056979 | 0.77904039 | 0.91248318 |
| Spink4      | 2.91141188 | 0.04849718 | 0.36715239 | 0.13209007 | 0.89491305 | NA         |
| Ippk        | 2306.78047 | 0.04846669 | 0.15575829 | 0.31116603 | 0.75567441 | 0.90203956 |
| Tmem255b    | 2.50778396 | 0.04844872 | 0.32298473 | 0.15000313 | 0.88076215 | NA         |
| BC068281    | 821.425213 | 0.04833781 | 0.21138426 | 0.22867268 | 0.81912333 | 0.93036217 |
| Akr1b10     | 1036.76899 | 0.04832196 | 0.26435833 | 0.18278961 | 0.8549631  | 0.94458789 |
| Nrg2        | 86.3874709 | 0.04824016 | 0.3986087  | 0.12102134 | 0.90367414 | 0.96352667 |
| Pid1        | 1417.61803 | 0.04815965 | 0.2512802  | 0.19165717 | 0.84801076 | 0.94168918 |
| Smyd4       | 1406.08919 | 0.04812581 | 0.20055775 | 0.23995987 | 0.81036137 | 0.9275573  |
| Zkscan3     | 2187.08322 | 0.04810577 | 0.15800214 | 0.3044628  | 0.76077533 | 0.90435844 |
| Cyp2c39     | 1.76776434 | 0.04808326 | 0.19935465 | 0.24119457 | 0.80940432 | NA         |
| Amer3       | 1.93697104 | 0.04795941 | 0.33037575 | 0.14516624 | 0.88457962 | NA         |
| Snrpc       | 3203.61682 | 0.04794267 | 0.15273145 | 0.31390174 | 0.75359567 | 0.90191816 |
| Srp72       | 15781.8218 | 0.04790782 | 0.16122514 | 0.29714857 | 0.76635308 | 0.90621355 |
| Prr14       | 3236.16158 | 0.04785356 | 0.20272389 | 0.23605291 | 0.81339162 | 0.92878688 |
| Kcna1       | 2.87854245 | 0.04776342 | 0.35794958 | 0.13343615 | 0.89384845 | NA         |
| Gm4926      | 0.98864997 | 0.04775678 | 0.20233507 | 0.23602821 | 0.81341078 | NA         |
| Mtus2       | 1414.17327 | 0.04773155 | 0.19096834 | 0.24994484 | 0.80263    | 0.92349559 |
| Cbx8        | 294.384555 | 0.04762928 | 0.29687127 | 0.1604375  | 0.87253645 | 0.95119624 |
| Dgcr8       | 5473.87884 | 0.0475544  | 0.18238439 | 0.26073721 | 0.79429517 | 0.91975523 |
| Prps1l3     | 7392.55289 | 0.04751036 | 0.19202077 | 0.24742303 | 0.80458085 | 0.92394305 |
| Ccnj        | 755.553251 | 0.04749821 | 0.24486893 | 0.19397404 | 0.84619621 | 0.94147896 |
| Olfir221    | 1.57699463 | 0.04748825 | 0.26246898 | 0.18092901 | 0.8564233  | NA         |

|             |            |            |            |            |            |            |
|-------------|------------|------------|------------|------------|------------|------------|
| Celrr       | 2.66298937 | 0.04742932 | 0.34059711 | 0.13925345 | 0.88924987 | NA         |
| Msh6        | 63973.5923 | 0.04739161 | 0.17027081 | 0.2783308  | 0.78075843 | 0.9131063  |
| Robo2       | 4.4688758  | 0.04723235 | 0.3487485  | 0.13543385 | 0.89226886 | NA         |
| lqce        | 775.516694 | 0.04720056 | 0.18913103 | 0.24956541 | 0.80292345 | 0.92352256 |
| Crygs       | 4.41648719 | 0.04710678 | 0.38677785 | 0.12179287 | 0.90306306 | NA         |
| Vapa        | 13072.9402 | 0.04709717 | 0.17560416 | 0.2682008  | 0.78854476 | 0.91724584 |
| Nog         | 22.7842792 | 0.04705203 | 0.42844687 | 0.10981999 | 0.91255214 | 0.96715571 |
| Figl        | 36.7980745 | 0.04688452 | 0.41674663 | 0.11250125 | 0.91042598 | 0.96602309 |
| Rnf146      | 2365.55907 | 0.04687414 | 0.16310134 | 0.28739275 | 0.77381161 | 0.9098882  |
| Cnot3       | 6377.49965 | 0.04678631 | 0.2087003  | 0.22417939 | 0.82261772 | 0.93107393 |
| Maneal      | 795.267865 | 0.04673304 | 0.20946309 | 0.22310871 | 0.8234509  | 0.93107393 |
| Rcbtb1      | 5596.70068 | 0.04663296 | 0.23416768 | 0.19914344 | 0.84215054 | 0.93987965 |
| Mad1l1      | 3056.76201 | 0.04653344 | 0.18643464 | 0.2495965  | 0.8028994  | 0.92352256 |
| Elovl2      | 696.933419 | 0.04650389 | 0.25288353 | 0.1838945  | 0.85409622 | 0.94431772 |
| Utp23       | 1669.57648 | 0.04646958 | 0.17883413 | 0.25984739 | 0.79498149 | 0.91991645 |
| Tirap       | 1186.68101 | 0.04638017 | 0.2365658  | 0.1960561  | 0.84456626 | 0.94122473 |
| Gm10814     | 3.39035072 | 0.04635949 | 0.3677882  | 0.12604943 | 0.8996928  | NA         |
| Peg3os      | 1.02944538 | 0.04615549 | 0.20170684 | 0.22882461 | 0.81900523 | NA         |
| Mrps16      | 4034.2477  | 0.04615265 | 0.23815289 | 0.19379421 | 0.84633702 | 0.94147896 |
| Rundc3a     | 1433.44032 | 0.04612295 | 0.28850963 | 0.15986622 | 0.87298646 | 0.9515534  |
| Ccdc148     | 2.11742586 | 0.04611557 | 0.28027997 | 0.16453394 | 0.86931083 | NA         |
| Gm1720      | 4.68049341 | 0.04610863 | 0.40338522 | 0.11430422 | 0.90899664 | NA         |
| D1Ert622e   | 464.388052 | 0.04603788 | 0.25471204 | 0.18074481 | 0.85656789 | 0.94490057 |
| Snord66     | 4.16818926 | 0.04597938 | 0.39617716 | 0.11605762 | 0.90760687 | NA         |
| Htra3       | 29.5573103 | 0.04588393 | 0.43180468 | 0.10626085 | 0.91537539 | 0.96836839 |
| D030047H15  | 8.88360902 | 0.04567919 | 0.40695278 | 0.11224689 | 0.91062765 | 0.96610524 |
| 4922502N22l | 1.63784431 | 0.04555951 | 0.29451606 | 0.15469279 | 0.87706351 | NA         |
| Asb4        | 30.7464529 | 0.04547345 | 0.42126507 | 0.10794498 | 0.91403934 | 0.96800942 |
| Prr16       | 1.30848916 | 0.04544082 | 0.25142496 | 0.18073315 | 0.85657704 | NA         |
| Arhgap23    | 1909.03101 | 0.04542368 | 0.23548079 | 0.19289761 | 0.84703916 | 0.94147896 |
| Colec12     | 1646.15876 | 0.04537862 | 0.38704666 | 0.11724327 | 0.90666728 | 0.9645357  |
| Gm6194      | 3.17590754 | 0.04535071 | 0.3726614  | 0.12169415 | 0.90314124 | NA         |
| Snx1        | 6180.36006 | 0.04529083 | 0.18260954 | 0.24802006 | 0.80411889 | 0.92388669 |
| Sidt1       | 3.59950284 | 0.04523325 | 0.34701604 | 0.13034915 | 0.89629019 | NA         |
| Nit2        | 4935.99729 | 0.04510247 | 0.17161765 | 0.26280786 | 0.79269868 | 0.91912147 |
| Fam13c      | 571.846766 | 0.04505179 | 0.26215398 | 0.17185241 | 0.86355356 | 0.94702747 |
| Matk        | 118.773088 | 0.04498723 | 0.37736745 | 0.11921332 | 0.90510635 | 0.96399623 |
| Msl2        | 4164.25114 | 0.04489472 | 0.22221085 | 0.20203657 | 0.83988813 | 0.93897199 |
| Rbms1       | 2419.31746 | 0.04489159 | 0.26985954 | 0.16635169 | 0.86788019 | 0.94911228 |
| Tnfrsf25    | 58.5479485 | 0.04482597 | 0.34829114 | 0.12870259 | 0.89759299 | 0.96153958 |
| Slc16a1     | 17374.2105 | 0.04466164 | 0.19476295 | 0.22931279 | 0.81862582 | 0.93036217 |

|             |            |            |            |            |            |            |
|-------------|------------|------------|------------|------------|------------|------------|
| Rnaset2b    | 34.1594741 | 0.0446613  | 0.42773912 | 0.10441249 | 0.91684201 | 0.96879329 |
| Abi1        | 5916.82648 | 0.04454096 | 0.19838461 | 0.22451822 | 0.82235409 | 0.93101547 |
| 2310030A07f | 10.9429916 | 0.04453614 | 0.42708113 | 0.10428028 | 0.91694693 | 0.96879329 |
| Hdac9       | 26.6084081 | 0.04439603 | 0.42740396 | 0.1038737  | 0.91726958 | 0.96885548 |
| Fgf7        | 4.83546826 | 0.04436262 | 0.39540104 | 0.11219653 | 0.91066758 | NA         |
| Ino80d      | 2960.16626 | 0.04418592 | 0.24416378 | 0.18096836 | 0.85639241 | 0.9448845  |
| Nrxn2       | 233.566784 | 0.04412988 | 0.31476274 | 0.14020045 | 0.88850162 | 0.95732618 |
| Asap3       | 1085.75103 | 0.04408631 | 0.27407598 | 0.16085435 | 0.87220812 | 0.95107339 |
| Pet112      | 1495.43956 | 0.04405044 | 0.16150255 | 0.27275382 | 0.78504246 | 0.9153312  |
| Nelfcd      | 4573.85484 | 0.04403926 | 0.17531662 | 0.25119844 | 0.80166069 | 0.92325551 |
| Gpr146      | 131.783793 | 0.0440102  | 0.33674828 | 0.13069167 | 0.89601922 | 0.96084712 |
| Cox19       | 1041.57521 | 0.04397872 | 0.19797364 | 0.2221443  | 0.82420155 | 0.93107393 |
| Acot4       | 7.4179635  | 0.04397594 | 0.42741159 | 0.10288898 | 0.91805109 | 0.96891454 |
| Nppc        | 12.6400016 | 0.04394431 | 0.42393946 | 0.10365705 | 0.91744151 | 0.96891454 |
| Cd24a       | 2795.91344 | 0.04387922 | 0.30170926 | 0.14543543 | 0.88436709 | 0.95575952 |
| Cic         | 8129.65088 | 0.04384535 | 0.21847167 | 0.20069122 | 0.84094002 | 0.93940315 |
| Rps4l       | 23323.863  | 0.04377562 | 0.19860415 | 0.22041646 | 0.82554683 | 0.93152509 |
| 4933411G11l | 3.54808508 | 0.04368671 | 0.36970951 | 0.11816496 | 0.90593695 | NA         |
| Chd3os      | 236.358568 | 0.04353656 | 0.2548816  | 0.17081091 | 0.86437245 | 0.94728217 |
| Ascl4       | 11.2664124 | 0.04350139 | 0.43144657 | 0.10082684 | 0.91968792 | 0.96959357 |
| Gtf2f2      | 4656.08125 | 0.04345498 | 0.19720527 | 0.22035404 | 0.82559544 | 0.93152509 |
| Clu         | 313.487843 | 0.04338853 | 0.38817852 | 0.11177468 | 0.91100206 | 0.96617289 |
| Plekha8     | 3780.01522 | 0.04336569 | 0.19272387 | 0.22501461 | 0.82196791 | 0.93079758 |
| L3mbtl1     | 34.6112978 | 0.04336317 | 0.42288316 | 0.10254173 | 0.91832669 | 0.96904885 |
| H2-T3       | 160.85538  | 0.04333061 | 0.37554388 | 0.11538095 | 0.90814318 | 0.96498357 |
| Rad51c      | 2153.70214 | 0.04333054 | 0.17016204 | 0.25464279 | 0.79899901 | 0.92171351 |
| Gabrb2      | 8.6391944  | 0.04325566 | 0.40743088 | 0.10616686 | 0.91544996 | 0.96836839 |
| Arg1        | 1.04161782 | 0.04321574 | 0.2045623  | 0.21125957 | 0.83268473 | NA         |
| Hand2       | 19.5093957 | 0.04315043 | 0.42494602 | 0.10154331 | 0.91911918 | 0.96953982 |
| Bcl9l       | 796.899598 | 0.04310672 | 0.36426661 | 0.11833839 | 0.90579954 | 0.96413846 |
| Sytl2       | 3.15460262 | 0.04307025 | 0.36544657 | 0.11785648 | 0.90618138 | NA         |
| Slc25a53    | 107.998722 | 0.0430378  | 0.29633837 | 0.14523194 | 0.88452775 | 0.95575952 |
| Sspn        | 6.55811462 | 0.04303079 | 0.37130462 | 0.11589081 | 0.90773908 | 0.96495598 |
| 2810474O19l | 10441.7671 | 0.04295317 | 0.17759108 | 0.2418656  | 0.8088843  | 0.92698845 |
| Raly        | 17155.0572 | 0.04294067 | 0.16748686 | 0.25638235 | 0.79765562 | 0.92129698 |
| Smok4a      | 42.1312043 | 0.04286028 | 0.43030569 | 0.09960426 | 0.92065851 | 0.96990703 |
| Trim31      | 8.56120124 | 0.04280938 | 0.42640581 | 0.10039587 | 0.92003005 | 0.96972938 |
| Brd3        | 6969.29483 | 0.04279562 | 0.1844116  | 0.23206576 | 0.81648694 | 0.92985634 |
| Kcne1       | 4.20880982 | 0.04278868 | 0.34561094 | 0.12380591 | 0.90146895 | NA         |
| Syn1        | 529.597598 | 0.04275031 | 0.24867008 | 0.17191576 | 0.86350375 | 0.94702747 |
| 2210408F21F | 2.56032418 | 0.04271574 | 0.35488455 | 0.12036518 | 0.90419387 | NA         |

|             |            |            |            |            |            |            |
|-------------|------------|------------|------------|------------|------------|------------|
| A330033J07R | 0.48297734 | 0.04271447 | 0.17492954 | 0.24418102 | 0.80709063 | NA         |
| 4931403E22F | 0.48297734 | 0.04271447 | 0.17492954 | 0.24418102 | 0.80709063 | NA         |
| Mir5134     | 0.48297734 | 0.04271447 | 0.17492954 | 0.24418102 | 0.80709063 | NA         |
| D030018L15F | 0.48297734 | 0.04271447 | 0.17492954 | 0.24418102 | 0.80709063 | NA         |
| Gm5082      | 0.48297734 | 0.04271447 | 0.17492954 | 0.24418102 | 0.80709063 | NA         |
| Map3k7cl    | 0.48297734 | 0.04271447 | 0.17492954 | 0.24418102 | 0.80709063 | NA         |
| Cyp2c67     | 0.48297734 | 0.04271447 | 0.17492954 | 0.24418102 | 0.80709063 | NA         |
| Fgb         | 0.48297734 | 0.04271447 | 0.17492954 | 0.24418102 | 0.80709063 | NA         |
| 1700007K09F | 2.6755392  | 0.04270226 | 0.32044216 | 0.13326042 | 0.89398743 | NA         |
| Pdcd6       | 4427.23199 | 0.04266238 | 0.18711986 | 0.22799492 | 0.81965019 | 0.93046822 |
| Gm15706     | 73.1542546 | 0.04260709 | 0.36051487 | 0.11818399 | 0.90592188 | 0.96413846 |
| Habp4       | 675.737316 | 0.04255734 | 0.24178202 | 0.17601532 | 0.8602819  | 0.94552575 |
| Tmem263     | 2109.22763 | 0.04254471 | 0.23392783 | 0.18187108 | 0.8556839  | 0.94458789 |
| Smim13      | 984.351402 | 0.04246392 | 0.1736545  | 0.24453104 | 0.80681956 | 0.92559319 |
| Snord32a    | 103.155335 | 0.04241897 | 0.29368223 | 0.14443831 | 0.88515436 | 0.95578308 |
| Asb8        | 2134.54534 | 0.04240095 | 0.19146169 | 0.22145918 | 0.82473492 | 0.93107393 |
| Smpd3       | 2.51644925 | 0.04238159 | 0.25247312 | 0.16786577 | 0.86668888 | NA         |
| Hist1h2ab   | 2.64653884 | 0.04230561 | 0.35419318 | 0.11944221 | 0.90492503 | NA         |
| Cerkl       | 120.895706 | 0.0422989  | 0.33266994 | 0.12714976 | 0.89882187 | 0.96168428 |
| Fermt3      | 691.599162 | 0.04227542 | 0.26583454 | 0.15902909 | 0.87364596 | 0.95171748 |
| Akap13      | 1669.48983 | 0.04226558 | 0.26700588 | 0.15829458 | 0.87422468 | 0.95203557 |
| Bbc3        | 1401.74096 | 0.04222615 | 0.1914888  | 0.22051496 | 0.82547012 | 0.93152509 |
| Tnpo2       | 14559.643  | 0.04218708 | 0.21833094 | 0.1932254  | 0.84678245 | 0.94147896 |
| Cog1        | 2231.61475 | 0.0421742  | 0.23817942 | 0.17706905 | 0.85945415 | 0.9455234  |
| Pmfbp1      | 9.04210744 | 0.04216155 | 0.41202545 | 0.10232753 | 0.91849671 | 0.96908478 |
| Ddx55       | 1341.54725 | 0.04204111 | 0.19663381 | 0.21380409 | 0.83069983 | 0.9337556  |
| Ccdc106     | 205.131785 | 0.04199324 | 0.26856505 | 0.15636151 | 0.87574808 | 0.95264675 |
| Slc2a8      | 1273.33929 | 0.04197368 | 0.22112943 | 0.18981499 | 0.84945411 | 0.94268614 |
| Tpt1        | 72603.4269 | 0.04176716 | 0.1711939  | 0.24397575 | 0.8072496  | 0.9258757  |
| Tmbim4      | 2172.11106 | 0.0417326  | 0.19697489 | 0.21186763 | 0.8322103  | 0.93468889 |
| Tbrg1       | 11427.0594 | 0.04170949 | 0.16987271 | 0.24553381 | 0.80604314 | 0.92507578 |
| Jag2        | 943.184728 | 0.04162666 | 0.24902165 | 0.16716082 | 0.86724351 | 0.94875159 |
| Ccdc64b     | 36.3136861 | 0.04161    | 0.43069653 | 0.09661095 | 0.92303536 | 0.97104849 |
| Ugt3a1      | 0.4758216  | 0.04160351 | 0.17476311 | 0.2380566  | 0.81183719 | NA         |
| Mir6966     | 0.4758216  | 0.04160351 | 0.17476311 | 0.2380566  | 0.81183719 | NA         |
| 1600029I14R | 0.4758216  | 0.04160351 | 0.17476311 | 0.2380566  | 0.81183719 | NA         |
| F930015N05I | 0.4758216  | 0.04160351 | 0.17476311 | 0.2380566  | 0.81183719 | NA         |
| Acpp        | 735.400274 | 0.04148035 | 0.36953437 | 0.11225031 | 0.91062494 | 0.96610524 |
| Ost4        | 2794.4839  | 0.04140273 | 0.19761599 | 0.20951103 | 0.83404933 | 0.93583223 |
| Mpp1        | 3599.33539 | 0.04132034 | 0.17629444 | 0.23438254 | 0.81468801 | 0.92896417 |
| 4930415F15F | 0.79702959 | 0.04127866 | 0.24535425 | 0.16824105 | 0.86639365 | NA         |

|             |            |            |            |            |            |            |
|-------------|------------|------------|------------|------------|------------|------------|
| Prkag3      | 4.40582361 | 0.04127679 | 0.4047306  | 0.10198584 | 0.91876791 | NA         |
| Ccz1        | 6153.1291  | 0.04119902 | 0.1713477  | 0.24044104 | 0.80998837 | 0.92748171 |
| Bpifb4      | 15.3412125 | 0.04116455 | 0.42900154 | 0.09595433 | 0.92355685 | 0.971175   |
| Wnt10b      | 4.38423179 | 0.04116128 | 0.38320831 | 0.10741228 | 0.91446191 | NA         |
| Fbp1        | 44.4156682 | 0.04115976 | 0.4322282  | 0.09522692 | 0.92413459 | 0.9713263  |
| Irf3        | 2032.15404 | 0.04113324 | 0.17962602 | 0.22899377 | 0.81887376 | 0.93036217 |
| Cnot11      | 5340.31003 | 0.04111665 | 0.20400735 | 0.20154492 | 0.84027251 | 0.93906635 |
| Peg13       | 193.274461 | 0.04106421 | 0.38865929 | 0.10565607 | 0.91585524 | 0.9684122  |
| Mir7013     | 1.29041772 | 0.04105225 | 0.21499778 | 0.19094266 | 0.84857052 | NA         |
| Sparc       | 30075.1653 | 0.04103051 | 0.24777644 | 0.1655949  | 0.86847576 | 0.9493136  |
| Al414108    | 1422.86617 | 0.04097251 | 0.17636268 | 0.23231963 | 0.81628977 | 0.92977579 |
| Unc93a      | 8.03695811 | 0.04095447 | 0.41576445 | 0.09850402 | 0.92153208 | 0.97033375 |
| Vma21       | 1495.13765 | 0.04088813 | 0.18138574 | 0.22542088 | 0.82165187 | 0.93076517 |
| Casc1       | 26.2384377 | 0.04080774 | 0.41614457 | 0.09806145 | 0.92188349 | 0.97043051 |
| Aldoart2    | 24.9133523 | 0.04073999 | 0.39573079 | 0.10294874 | 0.91800365 | 0.96891454 |
| Ace3        | 2.02935071 | 0.04072301 | 0.20564809 | 0.19802282 | 0.84302721 | NA         |
| Mdh1b       | 5.83910486 | 0.04069054 | 0.40579433 | 0.10027379 | 0.92012696 | NA         |
| 9630033F20F | 10477.8127 | 0.04068333 | 0.1931213  | 0.21066204 | 0.83315099 | 0.93520508 |
| 4632415L05F | 527.997397 | 0.04052116 | 0.23297606 | 0.17392845 | 0.86192169 | 0.94622031 |
| Rab3ip      | 1938.82168 | 0.04051105 | 0.20212632 | 0.20042444 | 0.84114865 | 0.93940315 |
| 4933430H16I | 0.46866586 | 0.04047478 | 0.17459368 | 0.23182272 | 0.81667571 | NA         |
| Slc9a3      | 0.46866586 | 0.04047478 | 0.17459368 | 0.23182272 | 0.81667571 | NA         |
| Defb20      | 0.46866586 | 0.04047478 | 0.17459368 | 0.23182272 | 0.81667571 | NA         |
| Bpifb9b     | 0.46866586 | 0.04047478 | 0.17459368 | 0.23182272 | 0.81667571 | NA         |
| Mir5135     | 0.46866586 | 0.04047478 | 0.17459368 | 0.23182272 | 0.81667571 | NA         |
| Inip        | 2870.60993 | 0.04046303 | 0.1990595  | 0.20327103 | 0.83892319 | 0.93836543 |
| Zfyve27     | 1956.60553 | 0.04046046 | 0.18060108 | 0.22403224 | 0.82273221 | 0.93107393 |
| Col5a1      | 1453.53429 | 0.04045797 | 0.29225365 | 0.13843443 | 0.88989709 | 0.9580332  |
| Nisch       | 19524.7786 | 0.04039926 | 0.2034045  | 0.19861536 | 0.84256364 | 0.94007083 |
| Npdc1       | 867.355353 | 0.04034746 | 0.26244117 | 0.15373905 | 0.87781549 | 0.95329223 |
| Ebf2        | 7.22576388 | 0.04030035 | 0.4274     | 0.09429187 | 0.92487731 | 0.97150501 |
| Sox12       | 2871.17681 | 0.04027723 | 0.21706382 | 0.18555479 | 0.85279391 | 0.94423839 |
| Gm5820      | 1.01011719 | 0.04027353 | 0.18246711 | 0.22071666 | 0.82531306 | NA         |
| Phkg1       | 625.008264 | 0.04026832 | 0.28266542 | 0.14245931 | 0.88671722 | 0.95661824 |
| Hmgn1       | 23161.1832 | 0.04018437 | 0.18128201 | 0.22166771 | 0.82457256 | 0.93107393 |
| Fis1        | 3269.22498 | 0.0401033  | 0.21027184 | 0.19072122 | 0.84874402 | 0.94216329 |
| Ccdc86      | 2372.18294 | 0.03993446 | 0.25502858 | 0.15658817 | 0.87556942 | 0.95264507 |
| Rnf216      | 5492.60409 | 0.03992123 | 0.20752649 | 0.19236689 | 0.84745482 | 0.94147896 |
| E130311K13F | 352.030882 | 0.03982809 | 0.30721685 | 0.12964161 | 0.89684998 | 0.96132877 |
| Acp5        | 1326.38975 | 0.0398058  | 0.38429811 | 0.10358052 | 0.91750224 | 0.96891454 |
| Polr2g      | 6823.76891 | 0.03973697 | 0.19572405 | 0.20302547 | 0.83911513 | 0.93837763 |



|             |            |            |            |            |            |            |
|-------------|------------|------------|------------|------------|------------|------------|
| Csrp3       | 1.00936242 | 0.03966931 | 0.20492099 | 0.19358343 | 0.84650207 | NA         |
| Psme2       | 3789.1881  | 0.03965674 | 0.30369172 | 0.13058223 | 0.8961058  | 0.96084712 |
| Fsd1        | 701.117133 | 0.03965421 | 0.23930573 | 0.1657052  | 0.86838895 | 0.9493136  |
| Fndc3a      | 6377.56092 | 0.03964917 | 0.21476753 | 0.18461435 | 0.85353153 | 0.94431772 |
| Dsc1        | 0.46327177 | 0.03956882 | 0.17445752 | 0.22681065 | 0.82057098 | NA         |
| Gm14858     | 0.46327177 | 0.03956882 | 0.17445752 | 0.22681065 | 0.82057098 | NA         |
| Atp6v1e2    | 0.46327177 | 0.03956882 | 0.17445752 | 0.22681065 | 0.82057098 | NA         |
| 9630001P10F | 0.46327177 | 0.03956882 | 0.17445752 | 0.22681065 | 0.82057098 | NA         |
| Tas2r108    | 0.46327177 | 0.03956882 | 0.17445752 | 0.22681065 | 0.82057098 | NA         |
| ABO41803    | 0.46327177 | 0.03956882 | 0.17445752 | 0.22681065 | 0.82057098 | NA         |
| Adarb1      | 552.983804 | 0.03956367 | 0.32006856 | 0.12360999 | 0.90162408 | 0.96270877 |
| Helq        | 2268.66611 | 0.03949587 | 0.16809087 | 0.23496739 | 0.81423404 | 0.92878688 |
| Luc7l3      | 14186.5356 | 0.03942723 | 0.1716657  | 0.22967446 | 0.81834475 | 0.93032688 |
| Gm7694      | 29.7800961 | 0.03941985 | 0.42556596 | 0.09262924 | 0.92619811 | 0.97229279 |
| Ppic        | 5829.86907 | 0.03941346 | 0.23161916 | 0.17016495 | 0.86488041 | 0.94756625 |
| Lrrc72      | 0.92854184 | 0.03940889 | 0.19689876 | 0.20014797 | 0.84136486 | NA         |
| Galns       | 460.614738 | 0.03939402 | 0.21502424 | 0.18320735 | 0.85463532 | 0.94455253 |
| Cyp2c55     | 13.4533686 | 0.03937136 | 0.43196051 | 0.09114574 | 0.92737679 | 0.97266045 |
| A230072E10F | 2.64792311 | 0.03934277 | 0.36742967 | 0.10707566 | 0.91472896 | NA         |
| Gm11985     | 2.64792311 | 0.03934277 | 0.36742967 | 0.10707566 | 0.91472896 | NA         |
| Tceal8      | 5717.81244 | 0.03928382 | 0.19725734 | 0.19915012 | 0.84214531 | 0.93987965 |
| Rfc3        | 3115.72698 | 0.03922221 | 0.20182992 | 0.19433296 | 0.84591518 | 0.94147896 |
| Srf         | 2298.6945  | 0.03921126 | 0.17811006 | 0.22015185 | 0.82575289 | 0.93152509 |
| Ptpn11      | 6281.847   | 0.03920339 | 0.20419277 | 0.19199206 | 0.84774843 | 0.94155899 |
| Fgf4        | 23953.0677 | 0.03905633 | 0.17583028 | 0.22212516 | 0.82421645 | 0.93107393 |
| Usp4        | 8309.89085 | 0.03901705 | 0.1740892  | 0.224121   | 0.82266315 | 0.93107393 |
| Adh7        | 2.58894714 | 0.03898801 | 0.32715027 | 0.11917463 | 0.90513701 | NA         |
| Snip1       | 2568.26403 | 0.03896784 | 0.1644814  | 0.23691337 | 0.81272399 | 0.92878688 |
| Drosha      | 14775.6989 | 0.03888893 | 0.19401708 | 0.20044073 | 0.84113591 | 0.93940315 |
| Inf2        | 542.759713 | 0.03884166 | 0.22537995 | 0.17233856 | 0.86317137 | 0.94702747 |
| N4bp2l1     | 61.9934533 | 0.03879175 | 0.42679971 | 0.09088983 | 0.92758013 | 0.97272899 |
| Pcdh18      | 2.34818234 | 0.03868857 | 0.31484296 | 0.12288212 | 0.90220044 | NA         |
| Psmd7       | 17085.6869 | 0.03858085 | 0.18090456 | 0.21326632 | 0.83111924 | 0.93389781 |
| Tom22       | 8876.74012 | 0.03853059 | 0.17225884 | 0.22367842 | 0.82300754 | 0.93107393 |
| Ccdc64      | 388.55623  | 0.03850317 | 0.24614433 | 0.15642516 | 0.8756979  | 0.95264675 |
| Lrrc7       | 0.45611603 | 0.03840608 | 0.17428248 | 0.22036685 | 0.82558546 | NA         |
| Ccnb3       | 0.45611603 | 0.03840608 | 0.17428248 | 0.22036685 | 0.82558546 | NA         |
| Crygf       | 0.45611603 | 0.03840608 | 0.17428248 | 0.22036685 | 0.82558546 | NA         |
| 4930431F12F | 0.45611603 | 0.03840608 | 0.17428248 | 0.22036685 | 0.82558546 | NA         |
| D930007P13I | 0.45611603 | 0.03840608 | 0.17428248 | 0.22036685 | 0.82558546 | NA         |
| Rap1b       | 8533.57952 | 0.03812845 | 0.18843089 | 0.20234711 | 0.83964537 | 0.93883558 |

|             |            |            |            |            |            |            |
|-------------|------------|------------|------------|------------|------------|------------|
| 1110028F11F | 1.66986306 | 0.0381076  | 0.22753185 | 0.16748249 | 0.86699042 | NA         |
| Zfp157      | 2940.30554 | 0.03808538 | 0.15721045 | 0.2422573  | 0.8085808  | 0.92681383 |
| Exph5       | 231.309914 | 0.03804327 | 0.40857647 | 0.09311175 | 0.92581479 | 0.97207115 |
| Adad2       | 231.902538 | 0.03803586 | 0.37516211 | 0.10138513 | 0.91924474 | 0.96953982 |
| Cenpw       | 2799.07496 | 0.03801683 | 0.22708126 | 0.1674151  | 0.86704344 | 0.94870504 |
| Prmt5       | 17019.8296 | 0.03800976 | 0.19661665 | 0.19331915 | 0.84670903 | 0.94147896 |
| Kank4os     | 433.277603 | 0.03790117 | 0.29012336 | 0.13063812 | 0.89606158 | 0.96084712 |
| 2010015L04F | 324.525632 | 0.03788967 | 0.21436828 | 0.17675036 | 0.85970448 | 0.9455234  |
| Pigc        | 592.743821 | 0.03782088 | 0.21424575 | 0.17653038 | 0.85987728 | 0.9455234  |
| lkbip       | 2225.71166 | 0.03756417 | 0.16648843 | 0.22562631 | 0.82149208 | 0.93076517 |
| Col20a1     | 121.85402  | 0.0374709  | 0.36789294 | 0.10185273 | 0.91887357 | 0.96936455 |
| Cdc42se1    | 5621.87191 | 0.03743866 | 0.18294678 | 0.20464237 | 0.83785155 | 0.93751696 |
| Pfkfb3      | 1542.13507 | 0.03736243 | 0.35193814 | 0.10616192 | 0.91545389 | 0.96836839 |
| Rgs11       | 116.549841 | 0.03731741 | 0.41405595 | 0.09012648 | 0.92818671 | 0.97288637 |
| Ppm1j       | 698.823    | 0.03721565 | 0.23766799 | 0.15658672 | 0.87557057 | 0.95264507 |
| Ykt6        | 5760.03261 | 0.03719462 | 0.1901208  | 0.19563676 | 0.84489449 | 0.94132069 |
| Gm6402      | 36.0007157 | 0.03707507 | 0.38162153 | 0.0971514  | 0.92260616 | 0.97076346 |
| Rnf17       | 13180.1849 | 0.03707103 | 0.29868342 | 0.1241148  | 0.90122438 | 0.96269291 |
| Arhgef40    | 209.941246 | 0.03697462 | 0.34951316 | 0.10578892 | 0.91574982 | 0.96836839 |
| Ywhah       | 8516.38724 | 0.03697224 | 0.16160865 | 0.2287764  | 0.81904271 | 0.93036217 |
| Maf1        | 2870.39525 | 0.03693149 | 0.16793952 | 0.21990946 | 0.82594167 | 0.93155054 |
| Ube2w       | 2437.54581 | 0.03688894 | 0.19129795 | 0.19283499 | 0.8470882  | 0.94147896 |
| Glyr1       | 12811.2104 | 0.03685166 | 0.17542981 | 0.21006498 | 0.83361695 | 0.93545802 |
| 6330403A02f | 0.5050586  | 0.03682255 | 0.17544385 | 0.20988226 | 0.83375957 | NA         |
| 4933401D09l | 0.5050586  | 0.03682255 | 0.17544385 | 0.20988226 | 0.83375957 | NA         |
| Il22ra2     | 0.5050586  | 0.03682255 | 0.17544385 | 0.20988226 | 0.83375957 | NA         |
| Smim18      | 0.5050586  | 0.03682255 | 0.17544385 | 0.20988226 | 0.83375957 | NA         |
| 9230104L09F | 0.5050586  | 0.03682255 | 0.17544385 | 0.20988226 | 0.83375957 | NA         |
| Cyp2c40     | 0.5050586  | 0.03682255 | 0.17544385 | 0.20988226 | 0.83375957 | NA         |
| Cyp2d12     | 0.5050586  | 0.03682255 | 0.17544385 | 0.20988226 | 0.83375957 | NA         |
| Stxbp3b     | 0.5050586  | 0.03682255 | 0.17544385 | 0.20988226 | 0.83375957 | NA         |
| Gm11437     | 0.5050586  | 0.03682255 | 0.17544385 | 0.20988226 | 0.83375957 | NA         |
| Gm19276     | 0.5050586  | 0.03682255 | 0.17544385 | 0.20988226 | 0.83375957 | NA         |
| Pdss1       | 2034.75716 | 0.03682253 | 0.19641853 | 0.18746972 | 0.85129236 | 0.94351419 |
| Aldh16a1    | 4725.1027  | 0.03670117 | 0.20409356 | 0.17982523 | 0.85728977 | 0.94537748 |
| 6-Sep       | 1576.01351 | 0.0365741  | 0.33049601 | 0.11066428 | 0.91188257 | 0.96672055 |
| 4933406M09  | 6.48022197 | 0.03655551 | 0.38540362 | 0.09484994 | 0.92443402 | 0.9714195  |
| Cyp2a4      | 2.65067618 | 0.0365079  | 0.36095605 | 0.10114222 | 0.91943756 | NA         |
| Mknk1       | 1741.70212 | 0.03641997 | 0.19646313 | 0.18537815 | 0.85293245 | 0.94423839 |
| Spock3      | 2.93690439 | 0.03640812 | 0.33209395 | 0.10963198 | 0.91270125 | NA         |
| Cyp2b19     | 0.81635778 | 0.03640101 | 0.24639765 | 0.14773276 | 0.88255368 | NA         |

|             |            |            |            |            |            |            |
|-------------|------------|------------|------------|------------|------------|------------|
| Mrpl53      | 1768.14    | 0.03628334 | 0.18666595 | 0.19437577 | 0.84588166 | 0.94147896 |
| Mir6927     | 0.4435662  | 0.03627477 | 0.17396083 | 0.20852262 | 0.83482092 | NA         |
| Lhx1        | 0.4435662  | 0.03627477 | 0.17396083 | 0.20852262 | 0.83482092 | NA         |
| Mir1901     | 0.4435662  | 0.03627477 | 0.17396083 | 0.20852262 | 0.83482092 | NA         |
| A830009L08F | 0.4435662  | 0.03627477 | 0.17396083 | 0.20852262 | 0.83482092 | NA         |
| A930024E05F | 65.9504149 | 0.03625058 | 0.40079307 | 0.09044713 | 0.9279319  | 0.9727834  |
| Irx2        | 435.672425 | 0.03623305 | 0.23403728 | 0.15481741 | 0.87696526 | 0.95295135 |
| Pias2       | 19220.3224 | 0.03618907 | 0.15704683 | 0.23043488 | 0.81775386 | 0.93032    |
| Ptdss2      | 4537.40851 | 0.0361357  | 0.20260581 | 0.17835472 | 0.85844441 | 0.9455234  |
| Ndufb9      | 7898.20269 | 0.0360788  | 0.21056645 | 0.17134163 | 0.86395515 | 0.94708632 |
| Fstl3       | 90.0257948 | 0.03600123 | 0.42225796 | 0.08525886 | 0.93205559 | 0.97430464 |
| Lyrn5       | 1268.21358 | 0.0359423  | 0.23722581 | 0.15151094 | 0.87957269 | 0.95385748 |
| Men1        | 4465.82562 | 0.03593788 | 0.21235293 | 0.16923657 | 0.86561056 | 0.94808387 |
| Arl16       | 515.997007 | 0.03590835 | 0.19755411 | 0.18176465 | 0.85576743 | 0.94458789 |
| Tpp2        | 10839.7633 | 0.03586014 | 0.19994662 | 0.17934859 | 0.85766399 | 0.94538792 |
| Rhobtb1     | 51.4551507 | 0.03584049 | 0.42250303 | 0.08482896 | 0.93239737 | 0.97430464 |
| Ralgds      | 1797.58884 | 0.03583654 | 0.23737607 | 0.15096947 | 0.8799998  | 0.95411538 |
| Strn        | 1389.4793  | 0.0357871  | 0.27078476 | 0.13216069 | 0.89485719 | 0.96038316 |
| Klk6        | 0.49790286 | 0.03569391 | 0.17528603 | 0.20363237 | 0.83864079 | NA         |
| Cts3        | 0.49790286 | 0.03569391 | 0.17528603 | 0.20363237 | 0.83864079 | NA         |
| Mir6984     | 0.49790286 | 0.03569391 | 0.17528603 | 0.20363237 | 0.83864079 | NA         |
| Aif1        | 0.49790286 | 0.03569391 | 0.17528603 | 0.20363237 | 0.83864079 | NA         |
| Tgtp2       | 0.49790286 | 0.03569391 | 0.17528603 | 0.20363237 | 0.83864079 | NA         |
| BC061194    | 0.49790286 | 0.03569391 | 0.17528603 | 0.20363237 | 0.83864079 | NA         |
| Erv3        | 0.49790286 | 0.03569391 | 0.17528603 | 0.20363237 | 0.83864079 | NA         |
| Lrrc71      | 0.49790286 | 0.03569391 | 0.17528603 | 0.20363237 | 0.83864079 | NA         |
| 4930558K02F | 0.49790286 | 0.03569391 | 0.17528603 | 0.20363237 | 0.83864079 | NA         |
| Arhgef1     | 3748.95427 | 0.03559926 | 0.23913396 | 0.14886744 | 0.88165824 | 0.95498135 |
| Serpinh1    | 7479.10141 | 0.0355988  | 0.37568671 | 0.09475661 | 0.92450816 | 0.9714195  |
| Elp6        | 1100.25267 | 0.03559324 | 0.21039448 | 0.16917381 | 0.86565993 | 0.94808387 |
| Kdm2a       | 6757.91543 | 0.03551714 | 0.20783587 | 0.17089032 | 0.86431001 | 0.94728217 |
| Fastkd3     | 2194.26696 | 0.03538633 | 0.18367498 | 0.19265732 | 0.84722735 | 0.94147896 |
| Zmat3       | 8931.73897 | 0.03531239 | 0.19311127 | 0.18286031 | 0.85490762 | 0.94458789 |
| Gpr115      | 6.52759828 | 0.03526027 | 0.41983689 | 0.08398565 | 0.93306784 | 0.97467283 |
| Clcn4-2     | 566.012275 | 0.03523928 | 0.20538499 | 0.17157671 | 0.86377032 | 0.94702747 |
| Zfy1        | 206.998692 | 0.03501544 | 0.23118039 | 0.15146373 | 0.87960992 | 0.95385748 |
| Pphln1      | 3191.96422 | 0.03492489 | 0.20340503 | 0.1717012  | 0.86367244 | 0.94702747 |
| Magea5      | 87.9334357 | 0.03481078 | 0.31184474 | 0.11162855 | 0.91111794 | 0.96617906 |
| Nol12       | 2196.1557  | 0.03474155 | 0.22322038 | 0.1556379  | 0.87631845 | 0.9526479  |
| Chchd1      | 5525.07507 | 0.03473801 | 0.22251107 | 0.15611811 | 0.87593993 | 0.95264675 |
| Sirt7       | 938.710229 | 0.03469864 | 0.22252088 | 0.15593432 | 0.87608479 | 0.95264675 |

|             |            |            |            |            |            |            |
|-------------|------------|------------|------------|------------|------------|------------|
| Bbip1       | 934.335516 | 0.0346691  | 0.22142336 | 0.15657382 | 0.87558073 | 0.95264507 |
| Dopey1      | 1732.83607 | 0.03466292 | 0.21234555 | 0.16323829 | 0.87033082 | 0.9499905  |
| Abhd17a     | 2515.64147 | 0.03460277 | 0.21967626 | 0.15751709 | 0.87483734 | 0.95243598 |
| Foxi1       | 0.49074711 | 0.03454724 | 0.17512537 | 0.19727147 | 0.84361511 | NA         |
| 5430425K12F | 0.49074711 | 0.03454724 | 0.17512537 | 0.19727147 | 0.84361511 | NA         |
| Slfn14      | 0.49074711 | 0.03454724 | 0.17512537 | 0.19727147 | 0.84361511 | NA         |
| Magt1       | 6588.57104 | 0.03451516 | 0.20978481 | 0.16452651 | 0.86931668 | 0.94941665 |
| Slc39a7     | 8533.3512  | 0.0344754  | 0.19825056 | 0.17389813 | 0.86194552 | 0.94622031 |
| Mrps10      | 3629.16734 | 0.03440574 | 0.22593972 | 0.15227839 | 0.87896737 | 0.95372743 |
| Ifi35       | 1114.90548 | 0.03433005 | 0.36273839 | 0.09464134 | 0.92459971 | 0.9714195  |
| Ppp2r4      | 7443.626   | 0.03430427 | 0.16624781 | 0.20634418 | 0.83652207 | 0.93698697 |
| Map3k3      | 2825.78599 | 0.03430184 | 0.2276515  | 0.15067697 | 0.88023054 | 0.95423249 |
| Fam98c      | 1178.60285 | 0.03421618 | 0.22008586 | 0.15546741 | 0.87645285 | 0.95266081 |
| Ndufaf1     | 2556.46062 | 0.03414127 | 0.19112814 | 0.17863025 | 0.85822804 | 0.9455234  |
| Caprin2     | 4108.51446 | 0.03409897 | 0.20770365 | 0.16417127 | 0.86959631 | 0.949522   |
| 1810034E14F | 20.0948085 | 0.03407176 | 0.41894079 | 0.08132834 | 0.93518084 | 0.97590908 |
| Rrp7a       | 4201.57632 | 0.03406367 | 0.19343869 | 0.17609544 | 0.86021896 | 0.9455234  |
| Rad51       | 6801.76436 | 0.03402296 | 0.17655129 | 0.19270867 | 0.84718714 | 0.94147896 |
| Gm16796     | 0.80418533 | 0.03387235 | 0.21943635 | 0.15436071 | 0.87732533 | NA         |
| Hes3        | 0.80418533 | 0.03387235 | 0.21943635 | 0.15436071 | 0.87732533 | NA         |
| Ghsr        | 19.9492486 | 0.03385229 | 0.42827785 | 0.07904282 | 0.93699856 | 0.97680712 |
| Tmem67      | 500.965906 | 0.03381718 | 0.20517242 | 0.16482322 | 0.86908313 | 0.9493616  |
| Bcl2l14     | 1497.55801 | 0.03364427 | 0.21004632 | 0.16017546 | 0.87274286 | 0.95135456 |
| Bspry       | 312.757325 | 0.03363419 | 0.35111951 | 0.0957913  | 0.92368633 | 0.97121339 |
| Creb5       | 0.48535303 | 0.03362876 | 0.17499645 | 0.19216823 | 0.84761043 | NA         |
| 4933400A11f | 0.48535303 | 0.03362876 | 0.17499645 | 0.19216823 | 0.84761043 | NA         |
| 4930435E12F | 0.48535303 | 0.03362876 | 0.17499645 | 0.19216823 | 0.84761043 | NA         |
| Emx2        | 0.48535303 | 0.03362876 | 0.17499645 | 0.19216823 | 0.84761043 | NA         |
| Egr3        | 0.48535303 | 0.03362876 | 0.17499645 | 0.19216823 | 0.84761043 | NA         |
| Tspan4      | 1533.09752 | 0.03355725 | 0.22701724 | 0.14781808 | 0.88248634 | 0.95547901 |
| Mir382      | 2.02456998 | 0.03349768 | 0.31086178 | 0.10775748 | 0.91418807 | NA         |
| Gm266       | 7.95935847 | 0.03349579 | 0.33234296 | 0.10078681 | 0.9197197  | 0.96959357 |
| Brd9        | 3005.05848 | 0.03348809 | 0.15829797 | 0.21155098 | 0.83245736 | 0.934847   |
| Brat1       | 1411.24512 | 0.03335648 | 0.19820865 | 0.16828975 | 0.86635534 | 0.94844716 |
| Phpt1       | 1612.60799 | 0.03328176 | 0.21478547 | 0.1549535  | 0.87685798 | 0.95290135 |
| Gm5069      | 43.9315612 | 0.03320144 | 0.37429096 | 0.08870491 | 0.92931643 | 0.97357854 |
| BC024386    | 1.09615633 | 0.03319349 | 0.26834477 | 0.12369718 | 0.90155505 | NA         |
| Ano1        | 101.995406 | 0.03319094 | 0.42142815 | 0.07875824 | 0.93722492 | 0.97680712 |
| Gprc5b      | 928.050411 | 0.03316207 | 0.20863388 | 0.15894862 | 0.87370935 | 0.95171748 |
| Pdcd11      | 12496.0662 | 0.0331355  | 0.22328003 | 0.14840334 | 0.88202446 | 0.95517844 |
| Stau2       | 547.426119 | 0.03301656 | 0.28523349 | 0.11575275 | 0.9078485  | 0.96495598 |

|              |            |            |            |            |            |            |
|--------------|------------|------------|------------|------------|------------|------------|
| Mir6951      | 1.13519008 | 0.03301399 | 0.26968162 | 0.1224184  | 0.90256767 | NA         |
| Atp6v1c1     | 7624.03052 | 0.03298122 | 0.17141578 | 0.19240483 | 0.84742511 | 0.94147896 |
| Slc6a3       | 14.4691277 | 0.03297033 | 0.43171308 | 0.07637093 | 0.939124   | 0.97792402 |
| LOC10263333: | 9.38828371 | 0.03281351 | 0.43082717 | 0.07616397 | 0.93928865 | 0.97802998 |
| Exosc4       | 1618.97891 | 0.03276951 | 0.221233   | 0.14812216 | 0.88224636 | 0.95528569 |
| Gm5512       | 31.0279389 | 0.03276342 | 0.43123717 | 0.0759754  | 0.93943867 | 0.9781207  |
| Vopp1        | 359.639572 | 0.03274347 | 0.37702199 | 0.08684765 | 0.93079261 | 0.97430464 |
| Lrba         | 3391.79656 | 0.0326778  | 0.20656514 | 0.15819608 | 0.87430229 | 0.95205342 |
| Sssca1       | 1520.12149 | 0.03262617 | 0.26205746 | 0.12450008 | 0.90091934 | 0.96269291 |
| 2410141K09F  | 2341.6716  | 0.03258307 | 0.40754503 | 0.07994961 | NA         | NA         |
| Zar1         | 1.0866249  | 0.03255032 | 0.23843519 | 0.13651642 | 0.89141304 | NA         |
| Tomm40l      | 1344.48062 | 0.03254866 | 0.22216001 | 0.14650999 | 0.8835188  | 0.95568774 |
| Taf1c        | 1569.34694 | 0.0325307  | 0.26591952 | 0.12233288 | 0.9026354  | 0.96301338 |
| Pan3         | 2922.25858 | 0.03245693 | 0.22166421 | 0.14642385 | 0.8835868  | 0.95568774 |
| Mir1193      | 0.47819729 | 0.03244859 | 0.17483049 | 0.18560028 | 0.85275824 | NA         |
| Pcdhb5       | 0.47819729 | 0.03244859 | 0.17483049 | 0.18560028 | 0.85275824 | NA         |
| Defb29       | 0.47819729 | 0.03244859 | 0.17483049 | 0.18560028 | 0.85275824 | NA         |
| 2700081O15l  | 1893.46068 | 0.03237551 | 0.22373542 | 0.14470445 | 0.88494423 | 0.95578308 |
| Tfdp2        | 6313.40725 | 0.03235453 | 0.17132989 | 0.18884346 | 0.85021551 | 0.94285826 |
| Clns1a       | 9484.31402 | 0.03230666 | 0.18229604 | 0.17722087 | 0.85933491 | 0.9455234  |
| Sppl3        | 4645.19766 | 0.03229602 | 0.17220099 | 0.1875484  | 0.85123068 | 0.94351307 |
| Gimap6       | 0.83606335 | 0.03221629 | 0.22124948 | 0.14561068 | 0.88422874 | NA         |
| Ift172       | 2690.5321  | 0.03216633 | 0.18189638 | 0.17683876 | 0.85963504 | 0.9455234  |
| Ctse         | 0.52438678 | 0.03209667 | 0.17585389 | 0.18251894 | 0.85517549 | NA         |
| C130080G10l  | 0.52438678 | 0.03209667 | 0.17585389 | 0.18251894 | 0.85517549 | NA         |
| Mrpl32       | 2925.67865 | 0.03199329 | 0.19187456 | 0.16674064 | 0.86757412 | 0.94897976 |
| Dmp1         | 3.0526861  | 0.0319361  | 0.29377915 | 0.10870786 | 0.91343421 | NA         |
| Kmt2c        | 4144.63115 | 0.03183925 | 0.2530794  | 0.12580736 | 0.89988441 | 0.96219077 |
| Vamp8        | 1156.76479 | 0.03183363 | 0.32594238 | 0.09766644 | 0.92219716 | 0.97047859 |
| Trp53bp2     | 2035.94185 | 0.03183105 | 0.20009186 | 0.15908217 | 0.87360413 | 0.95171748 |
| Hprt         | 13783.1844 | 0.03175179 | 0.17602954 | 0.1803776  | 0.85685614 | 0.94503332 |
| Med13l       | 7208.32564 | 0.03172724 | 0.2115695  | 0.14996129 | 0.88079515 | 0.9545784  |
| Hook1        | 3784.29028 | 0.03156952 | 0.23170474 | 0.13624893 | 0.89162449 | 0.95883082 |
| Map3k10      | 1171.13755 | 0.03151271 | 0.24655298 | 0.12781315 | 0.89829684 | 0.96162064 |
| Ndufb10      | 4702.9097  | 0.03143157 | 0.203504   | 0.15445187 | 0.87725345 | 0.95317909 |
| Mir181d      | 2.30800097 | 0.03138498 | 0.31458265 | 0.09976704 | 0.92052927 | NA         |
| E4f1         | 1596.05274 | 0.03129016 | 0.16280873 | 0.19218971 | 0.8475936  | 0.94149486 |
| Cdk8         | 3359.77896 | 0.03125107 | 0.17675825 | 0.17680121 | 0.85966454 | 0.9455234  |
| Unc119       | 1928.92022 | 0.03124394 | 0.23736695 | 0.13162718 | 0.89527919 | 0.96063525 |
| Ano2         | 0.79465391 | 0.03110076 | 0.19012965 | 0.16357657 | 0.87006449 | NA         |
| Cel          | 0.79465391 | 0.03110076 | 0.19012965 | 0.16357657 | 0.87006449 | NA         |

|             |            |            |            |            |            |            |
|-------------|------------|------------|------------|------------|------------|------------|
| Insl5       | 0.79465391 | 0.03110076 | 0.19012965 | 0.16357657 | 0.87006449 | NA         |
| Gbp2        | 11.7134961 | 0.03102654 | 0.39086141 | 0.0793799  | 0.93673046 | 0.97680516 |
| Cxcr2       | 0.51723104 | 0.03095642 | 0.17570275 | 0.17618631 | 0.86014757 | NA         |
| Gm8773      | 0.51723104 | 0.03095642 | 0.17570275 | 0.17618631 | 0.86014757 | NA         |
| Bank1       | 0.51723104 | 0.03095642 | 0.17570275 | 0.17618631 | 0.86014757 | NA         |
| Olf12       | 0.51723104 | 0.03095642 | 0.17570275 | 0.17618631 | 0.86014757 | NA         |
| Prlhr       | 0.51723104 | 0.03095642 | 0.17570275 | 0.17618631 | 0.86014757 | NA         |
| Mir7082     | 0.51723104 | 0.03095642 | 0.17570275 | 0.17618631 | 0.86014757 | NA         |
| Dock9       | 3034.92418 | 0.03092319 | 0.2268232  | 0.13633168 | 0.89155908 | 0.95882678 |
| Amer2       | 6.16961407 | 0.03083577 | 0.37980463 | 0.0811885  | 0.93529205 | 0.97595965 |
| Nfkbib      | 2057.97441 | 0.03079983 | 0.20016169 | 0.15387477 | 0.87770848 | 0.95329223 |
| Akt1        | 2700.71058 | 0.03075543 | 0.19307306 | 0.15929428 | 0.87343703 | 0.95171748 |
| Gm16973     | 401.302121 | 0.03071643 | 0.25945602 | 0.11838779 | 0.9057604  | 0.96413846 |
| Arih1       | 12121.0079 | 0.03068626 | 0.16699292 | 0.18375785 | 0.85420342 | 0.94431772 |
| Wnt5a       | 7.83538646 | 0.03065568 | 0.39302596 | 0.07799913 | 0.93782875 | 0.97728142 |
| D16Ert472e  | 2385.44563 | 0.03063705 | 0.32108515 | 0.09541722 | 0.92398344 | 0.9713263  |
| Epha2       | 5973.6438  | 0.03062715 | 0.19982205 | 0.1532721  | 0.8781837  | 0.95329223 |
| 4921511C10F | 0.83843903 | 0.0305565  | 0.24752013 | 0.12345056 | 0.90175032 | NA         |
| 1700003D09I | 0.83843903 | 0.0305565  | 0.24752013 | 0.12345056 | 0.90175032 | NA         |
| Nfx1        | 11780.6002 | 0.03054965 | 0.16607052 | 0.1839559  | 0.85404805 | 0.94431772 |
| Gm5095      | 1.40545721 | 0.03052267 | 0.25515881 | 0.11962223 | 0.90478241 | NA         |
| Acat2       | 7288.96462 | 0.03047479 | 0.20354106 | 0.14972306 | 0.88098311 | 0.9546085  |
| Vimp        | 2565.20164 | 0.03043212 | 0.21050893 | 0.14456452 | 0.88505471 | 0.95578308 |
| Rbak        | 977.39304  | 0.0303958  | 0.21645191 | 0.14042751 | 0.88832222 | 0.95731423 |
| BB557941    | 4.13753322 | 0.03036632 | 0.36702424 | 0.08273655 | 0.93406102 | NA         |
| Tmem150c    | 4.42399807 | 0.03033005 | 0.38551801 | 0.0786735  | 0.93729233 | NA         |
| Strap       | 17788.4849 | 0.03031263 | 0.17963033 | 0.16875006 | 0.86599324 | 0.94818425 |
| 4932415M13  | 0.46564746 | 0.03028766 | 0.17452574 | 0.17354266 | 0.86222489 | NA         |
| Tmem204     | 0.46564746 | 0.03028766 | 0.17452574 | 0.17354266 | 0.86222489 | NA         |
| Calml3      | 0.46564746 | 0.03028766 | 0.17452574 | 0.17354266 | 0.86222489 | NA         |
| Ms4a1       | 0.46564746 | 0.03028766 | 0.17452574 | 0.17354266 | 0.86222489 | NA         |
| Lrrc69      | 0.46564746 | 0.03028766 | 0.17452574 | 0.17354266 | 0.86222489 | NA         |
| 4930483J18R | 1.45402239 | 0.0301799  | 0.28388495 | 0.10631033 | 0.91533613 | NA         |
| Rtca        | 4125.52896 | 0.03015091 | 0.16841109 | 0.17903161 | 0.85791288 | 0.9455234  |
| Ces2g       | 6.06286181 | 0.03007164 | 0.40077012 | 0.07503463 | 0.94018716 | 0.97844661 |
| Lrp11       | 3936.75222 | 0.03006328 | 0.18148386 | 0.16565266 | 0.8684303  | 0.9493136  |
| Pcdhb3      | 0.78447976 | 0.03001424 | 0.21821391 | 0.13754504 | 0.89059999 | NA         |
| Usb1        | 2156.11538 | 0.02995919 | 0.22429135 | 0.13357264 | 0.89374052 | 0.96004412 |
| 4931406B18F | 1.35103076 | 0.02990605 | 0.1857575  | 0.16099512 | 0.87209725 | NA         |
| Klhl30      | 23.2740744 | 0.02987981 | 0.40515118 | 0.07374978 | 0.94120949 | 0.97866806 |
| Gm10474     | 10.2588403 | 0.02987399 | 0.42821513 | 0.06976399 | 0.94438151 | 0.98005185 |

|             |            |            |            |            |            |            |
|-------------|------------|------------|------------|------------|------------|------------|
| Commd2      | 2381.00781 | 0.02981703 | 0.16924344 | 0.17617835 | 0.86015383 | 0.9455234  |
| Vwa5b1      | 1.36960417 | 0.02980098 | 0.2211855  | 0.13473299 | 0.89282299 | NA         |
| 4931429P17F | 0.5100753  | 0.02979824 | 0.1755489  | 0.16974325 | 0.86521206 | NA         |
| Gm4461      | 0.5100753  | 0.02979824 | 0.1755489  | 0.16974325 | 0.86521206 | NA         |
| Tmprss11g   | 0.5100753  | 0.02979824 | 0.1755489  | 0.16974325 | 0.86521206 | NA         |
| Hace1       | 1764.74509 | 0.02978391 | 0.21173823 | 0.14066383 | 0.88813552 | 0.95726334 |
| Rrs1        | 6238.13489 | 0.02968047 | 0.17620795 | 0.16844    | 0.86623714 | 0.94838452 |
| Mbd3l2      | 2.02570214 | 0.02960366 | 0.23663    | 0.12510528 | 0.90044021 | NA         |
| Dnali1      | 7.40943251 | 0.02958896 | 0.40034945 | 0.07390782 | 0.94108373 | 0.97866806 |
| Dapp1       | 947.563774 | 0.02951507 | 0.26040722 | 0.11334197 | 0.90975945 | 0.96564042 |
| Zfp777      | 2002.4486  | 0.02951112 | 0.17162493 | 0.17195123 | 0.86347587 | 0.94702747 |
| BC039966    | 20.7451067 | 0.02950413 | 0.42586043 | 0.06928122 | 0.94476578 | 0.98017434 |
| Fstl4       | 9.55753525 | 0.02930299 | 0.42618012 | 0.06875728 | 0.94518282 | 0.98022928 |
| Chn2        | 548.182836 | 0.02928047 | 0.42964695 | 0.06815007 | 0.94566617 | 0.98027294 |
| BC023829    | 1283.32005 | 0.02923778 | 0.18311949 | 0.15966502 | 0.87314496 | 0.95165946 |
| Hcfc2       | 889.308423 | 0.029198   | 0.21073571 | 0.13855267 | 0.88980365 | 0.9580332  |
| Brms1       | 1997.64265 | 0.02918946 | 0.21647891 | 0.13483743 | 0.89274041 | 0.95958049 |
| Tekt3       | 0.78210408 | 0.02917926 | 0.18931971 | 0.15412691 | 0.87750967 | NA         |
| Gabbr2      | 0.78210408 | 0.02917926 | 0.18931971 | 0.15412691 | 0.87750967 | NA         |
| Tm9sf2      | 11676.3978 | 0.02909657 | 0.15368349 | 0.18932788 | 0.84983585 | 0.94277489 |
| Stamos      | 8.15083451 | 0.02898729 | 0.42030358 | 0.0689675  | 0.94501549 | 0.98018648 |
| Adam9       | 4147.38788 | 0.02893496 | 0.24320779 | 0.11897219 | 0.90529739 | 0.96404417 |
| Pcdh10      | 0.80180965 | 0.0288934  | 0.18062898 | 0.15995994 | 0.87291263 | NA         |
| Fam227b     | 0.50468121 | 0.02887182 | 0.17542559 | 0.16458158 | 0.86927333 | NA         |
| Bmp3        | 0.50468121 | 0.02887182 | 0.17542559 | 0.16458158 | 0.86927333 | NA         |
| 4930474N09I | 0.50468121 | 0.02887182 | 0.17542559 | 0.16458158 | 0.86927333 | NA         |
| Stradb      | 726.913361 | 0.02885649 | 0.26304524 | 0.10970162 | 0.91264602 | 0.96715571 |
| Camkk2      | 2343.63757 | 0.02873886 | 0.18264109 | 0.15735154 | 0.8749678  | 0.95244465 |
| E130304I02R | 1.13756577 | 0.02870571 | 0.29270907 | 0.09806907 | 0.92187745 | NA         |
| Sigirr      | 1281.65698 | 0.02843983 | 0.2430594  | 0.11700774 | 0.90685392 | 0.96458038 |
| 1700110K17F | 11.3026618 | 0.02843218 | 0.43158681 | 0.06587824 | 0.94747477 | 0.98081963 |
| Tufm        | 3774.7262  | 0.02839167 | 0.25065609 | 0.11326943 | 0.90981696 | 0.96564042 |
| Ppm1b       | 7281.43798 | 0.02838097 | 0.15877754 | 0.17874678 | 0.85813654 | 0.9455234  |
| 0610039K10F | 2.05468634 | 0.02836672 | 0.29827502 | 0.09510257 | 0.92423336 | NA         |
| Yy1         | 6746.00678 | 0.02835032 | 0.19012968 | 0.14911043 | 0.88146649 | 0.95490668 |
| Gm16157     | 4.25265774 | 0.02830464 | 0.37776762 | 0.07492605 | 0.94027355 | NA         |
| Snx27       | 6951.99316 | 0.02830156 | 0.19905118 | 0.14218234 | 0.88693598 | 0.95669983 |
| Samd8       | 3598.33368 | 0.02828029 | 0.20576204 | 0.13744174 | 0.89068164 | 0.9584185  |
| Ctns        | 1862.83647 | 0.02819774 | 0.24624975 | 0.11450871 | 0.90883454 | 0.96531171 |
| Cox6b2      | 2676.22438 | 0.02816839 | 0.25289316 | 0.11138456 | 0.9113114  | 0.96630326 |
| E030019B06F | 3.41919486 | 0.02814146 | 0.29872105 | 0.09420649 | 0.92494513 | NA         |

|             |            |            |            |            |            |            |
|-------------|------------|------------|------------|------------|------------|------------|
| Ddx39b      | 18556.9174 | 0.02805736 | 0.18862809 | 0.14874431 | 0.8817554  | 0.95502007 |
| A330076H08  | 2.5851585  | 0.02802858 | 0.31808727 | 0.08811601 | 0.92978447 | NA         |
| Ccdc104     | 3516.75542 | 0.02800472 | 0.21855872 | 0.12813362 | 0.89804323 | 0.96162064 |
| Alas1       | 1821.39702 | 0.02782487 | 0.17256701 | 0.16124093 | 0.87190365 | 0.95103974 |
| Al839979    | 7.24119137 | 0.02780322 | 0.41847186 | 0.06643988 | 0.94702762 | 0.98076289 |
| Engase      | 912.648415 | 0.02779137 | 0.25856129 | 0.10748467 | 0.91440449 | 0.96813073 |
| Uri1        | 7682.61357 | 0.02775874 | 0.21367413 | 0.12991157 | 0.89663639 | 0.96129559 |
| Uimc1       | 3178.13174 | 0.02771411 | 0.18788804 | 0.14750331 | 0.88273477 | 0.95554672 |
| Uso1        | 8775.59838 | 0.02771208 | 0.21584483 | 0.12838892 | 0.8978412  | 0.96161706 |
| Bean1       | 0.49752547 | 0.02768035 | 0.17526667 | 0.15793274 | 0.8745098  | NA         |
| Nkx2-1      | 0.49752547 | 0.02768035 | 0.17526667 | 0.15793274 | 0.8745098  | NA         |
| Tmem89      | 0.49752547 | 0.02768035 | 0.17526667 | 0.15793274 | 0.8745098  | NA         |
| A430093F15F | 1.61312204 | 0.02765698 | 0.23027473 | 0.12010429 | 0.90440054 | NA         |
| Srpr        | 9918.35144 | 0.0276544  | 0.20657308 | 0.13387222 | 0.89350362 | 0.95985595 |
| Tubb1       | 0.81911085 | 0.02758089 | 0.22023495 | 0.12523392 | 0.90033837 | NA         |
| Mir7064     | 0.81911085 | 0.02758089 | 0.22023495 | 0.12523392 | 0.90033837 | NA         |
| Gpx7        | 1131.03762 | 0.02756284 | 0.35018635 | 0.07870905 | 0.93726404 | 0.97680712 |
| Acad10      | 441.662855 | 0.02754039 | 0.20136658 | 0.13676742 | 0.89121464 | 0.95858894 |
| Pigw        | 632.519327 | 0.0275292  | 0.24074817 | 0.11434855 | 0.9089615  | 0.96531171 |
| Tnnc1       | 51.946715  | 0.02750891 | 0.36776316 | 0.07480061 | 0.94037336 | 0.97844661 |
| 5031425F14F | 1.43971091 | 0.02745242 | 0.28357298 | 0.09680899 | 0.92287808 | NA         |
| Nkx6-2      | 623.525925 | 0.02745086 | 0.40696311 | 0.06745293 | NA         | NA         |
| Calcr       | 2.98619566 | 0.02740897 | 0.35754426 | 0.07665897 | 0.93889485 | NA         |
| Cxcr3       | 1.38575164 | 0.02733556 | 0.25461904 | 0.10735867 | 0.91450444 | NA         |
| Mef2b       | 238.803171 | 0.02726941 | 0.32014883 | 0.0851773  | 0.93212044 | 0.97430464 |
| Ppap2c      | 455.760223 | 0.02726371 | 0.25721925 | 0.10599405 | 0.91558708 | 0.96836839 |
| Rnf170      | 958.932745 | 0.02719544 | 0.21234241 | 0.12807352 | 0.89809079 | 0.96162064 |
| Ski         | 5013.21968 | 0.02712164 | 0.20050778 | 0.13526477 | 0.89240253 | 0.9595291  |
| Agap1       | 2272.65134 | 0.02709117 | 0.20316896 | 0.13334304 | 0.89392209 | 0.96010139 |
| Mir24-2     | 0.80920203 | 0.02701816 | 0.21966808 | 0.12299537 | 0.90211076 | NA         |
| 2900060B14F | 7.07419092 | 0.02700242 | 0.40009231 | 0.06749047 | 0.94619125 | 0.98057263 |
| Zdhhc6      | 3053.83154 | 0.02699675 | 0.1621744  | 0.16646741 | 0.86778913 | 0.94908142 |
| Mir679      | 0.7677926  | 0.02699445 | 0.18837304 | 0.14330315 | 0.88605077 | NA         |
| Selenbp2    | 0.7677926  | 0.02699445 | 0.18837304 | 0.14330315 | 0.88605077 | NA         |
| Pigs        | 4299.92843 | 0.02696985 | 0.19062002 | 0.14148486 | 0.88748692 | 0.95689587 |
| Fcho1       | 1930.96845 | 0.02690133 | 0.2278918  | 0.11804429 | 0.90603256 | 0.96419027 |
| Foxc2       | 36.6983106 | 0.02685108 | 0.42819133 | 0.06270813 | 0.94999892 | 0.98175394 |
| Erc2        | 2256.07454 | 0.02681584 | 0.21786564 | 0.12308429 | 0.90204035 | 0.96270877 |
| Cox20       | 791.614618 | 0.02680622 | 0.19660201 | 0.13634764 | 0.89154646 | 0.95882678 |
| Rps3a1      | 39888.4579 | 0.02678921 | 0.27383719 | 0.09782895 | 0.92206812 | 0.97043051 |
| Malat1      | 17041.9894 | 0.02674643 | 0.2253526  | 0.11868702 | 0.90552332 | 0.96404417 |



|             |            |            |            |            |            |            |
|-------------|------------|------------|------------|------------|------------|------------|
| Zfp14       | 348.24388  | 0.02666049 | 0.21649148 | 0.12314801 | 0.90198989 | 0.96270877 |
| Adsl        | 6665.11475 | 0.02650679 | 0.20604798 | 0.12864378 | 0.89763952 | 0.96153958 |
| Kcne3       | 1.75854322 | 0.02644992 | 0.2982197  | 0.08869272 | 0.92932612 | NA         |
| Ube2z       | 13364.4287 | 0.02640377 | 0.17236884 | 0.15318181 | 0.8782549  | 0.95329223 |
| Appl2       | 1559.16946 | 0.02637554 | 0.22806767 | 0.11564788 | 0.90793161 | 0.96495598 |
| Gm21319     | 7.2401436  | 0.02637514 | 0.39682315 | 0.06646573 | 0.94700704 | 0.98076289 |
| Mir7087     | 1.1450989  | 0.02632849 | 0.24060164 | 0.10942771 | 0.91286325 | NA         |
| Yif1a       | 2214.21247 | 0.02631947 | 0.21792398 | 0.12077361 | 0.90387035 | 0.96364421 |
| Reps1       | 4065.96825 | 0.02628735 | 0.15316051 | 0.17163269 | 0.86372631 | 0.94702747 |
| Arl8b       | 5846.93268 | 0.02627365 | 0.17831843 | 0.14734117 | 0.88286274 | 0.95554672 |
| Megf6       | 213.26332  | 0.02626975 | 0.36133364 | 0.0727022  | 0.9420431  | 0.97906786 |
| Mcm4        | 26306.7845 | 0.0262666  | 0.21771367 | 0.12064747 | 0.90397027 | 0.96364421 |
| Ppil3       | 2331.04663 | 0.02623173 | 0.17997901 | 0.14574886 | 0.88411965 | 0.95575952 |
| Tpra1       | 770.061494 | 0.02619943 | 0.20329656 | 0.12887296 | 0.89745817 | 0.96153958 |
| Pou4f3      | 2.09046504 | 0.02617171 | 0.26859647 | 0.09743876 | 0.92237797 | NA         |
| Fhad1       | 161.165004 | 0.02614591 | 0.42511324 | 0.0615034  | 0.95095831 | 0.98228845 |
| Dlg3        | 2742.01503 | 0.02611189 | 0.16751937 | 0.15587386 | 0.87613245 | 0.95264675 |
| Zfp780b     | 658.199783 | 0.0260881  | 0.24395834 | 0.10693669 | 0.91483921 | 0.96832729 |
| 0610012G03I | 1557.95538 | 0.0260217  | 0.20733618 | 0.12550485 | 0.90012389 | 0.96238065 |
| Tbxas1      | 0.85098886 | 0.02602071 | 0.2219958  | 0.11721262 | 0.90669157 | NA         |
| Mir7052     | 0.85098886 | 0.02602071 | 0.2219958  | 0.11721262 | 0.90669157 | NA         |
| Gm20735     | 0.85098886 | 0.02602071 | 0.2219958  | 0.11721262 | 0.90669157 | NA         |
| Mir1943     | 3.7612338  | 0.02601132 | 0.3719665  | 0.06992921 | 0.94425    | NA         |
| Itm2b       | 5097.26129 | 0.02589714 | 0.17325908 | 0.14947064 | 0.88118228 | 0.95466529 |
| Adam2       | 5.25452658 | 0.02576201 | 0.36853006 | 0.06990477 | 0.94426946 | NA         |
| Ascl2       | 159.815878 | 0.02573708 | 0.3955946  | 0.06505923 | 0.94812684 | 0.98086219 |
| Plet1       | 1309.58994 | 0.02557605 | 0.32816467 | 0.07793663 | 0.93787846 | 0.97728142 |
| Il4i1       | 0.48497564 | 0.02550059 | 0.17497501 | 0.14573848 | 0.88412784 | NA         |
| Gm1110      | 0.48497564 | 0.02550059 | 0.17497501 | 0.14573848 | 0.88412784 | NA         |
| Mir6400     | 0.48497564 | 0.02550059 | 0.17497501 | 0.14573848 | 0.88412784 | NA         |
| H2-Q1       | 0.48497564 | 0.02550059 | 0.17497501 | 0.14573848 | 0.88412784 | NA         |
| Elfn2       | 3.86413563 | 0.02549197 | 0.39185327 | 0.06505489 | 0.94813029 | NA         |
| Tmem202     | 3.64957396 | 0.02548275 | 0.3798146  | 0.06709261 | 0.94650798 | NA         |
| Atp5d       | 9799.03151 | 0.02547918 | 0.18909498 | 0.13474276 | 0.89281526 | 0.95958049 |
| Gtf2e1      | 6615.81944 | 0.02544161 | 0.14503297 | 0.1754195  | 0.86075002 | 0.94567701 |
| Lmf2        | 1962.15518 | 0.02541695 | 0.21175541 | 0.12002976 | 0.90445957 | 0.96370338 |
| Mef2a       | 1162.66161 | 0.02538932 | 0.21482413 | 0.11818654 | 0.90591986 | 0.96413846 |
| Yap1        | 11441.6717 | 0.02533963 | 0.19755042 | 0.12826918 | 0.89793596 | 0.96162064 |
| Col6a6      | 2.35479839 | 0.02530462 | 0.28244595 | 0.08959101 | 0.92861223 | NA         |
| Lor         | 5.17276193 | 0.02525517 | 0.37309188 | 0.06769156 | 0.94603117 | NA         |
| Sec24d      | 2734.69378 | 0.02524165 | 0.20812502 | 0.1212812  | 0.90346831 | 0.96343157 |

|             |            |            |            |            |            |            |
|-------------|------------|------------|------------|------------|------------|------------|
| Arc         | 2032.53294 | 0.02521668 | 0.24447917 | 0.10314451 | 0.91784828 | 0.96891454 |
| Anks1b      | 19.4793324 | 0.02514316 | 0.43040124 | 0.05841794 | 0.95341572 | 0.98295517 |
| Gstt4       | 2.94401598 | 0.02500831 | 0.31799822 | 0.07864293 | 0.93731664 | NA         |
| Tnrc6b      | 2844.78608 | 0.02490291 | 0.28685181 | 0.08681456 | 0.93081891 | 0.97430464 |
| Nubp2       | 4389.64306 | 0.02490018 | 0.19506156 | 0.12765291 | 0.89842366 | 0.96162064 |
| Hibadh      | 5855.267   | 0.0248868  | 0.21674588 | 0.11482019 | 0.90858765 | 0.96525799 |
| Chrna5      | 28.3497041 | 0.02487156 | 0.42384186 | 0.05868123 | 0.95320601 | 0.98295517 |
| Rab1        | 21933.6771 | 0.02484315 | 0.15951896 | 0.15573791 | 0.87623962 | 0.95264675 |
| Jagn1       | 2904.06462 | 0.02478347 | 0.17849175 | 0.13884941 | 0.88956915 | 0.95801989 |
| Kcnj13      | 0.84321909 | 0.02466451 | 0.19133285 | 0.12890891 | 0.89742973 | NA         |
| Gsx1        | 0.84321909 | 0.02466451 | 0.19133285 | 0.12890891 | 0.89742973 | NA         |
| 1700125G22I | 0.84321909 | 0.02466451 | 0.19133285 | 0.12890891 | 0.89742973 | NA         |
| Eif2s3y     | 4304.26847 | 0.02465776 | 0.20024204 | 0.12313979 | NA         | NA         |
| Kif2a       | 5440.93055 | 0.02456771 | 0.20882711 | 0.11764616 | 0.90634803 | 0.96428995 |
| Cldn26      | 0.79665221 | 0.02452853 | 0.2189018  | 0.11205264 | 0.91078167 | NA         |
| 5730507C01F | 1723.77718 | 0.02452698 | 0.36727628 | 0.06678074 | 0.94675626 | 0.98072348 |
| Baz1b       | 13478.7813 | 0.02451422 | 0.19671886 | 0.12461551 | 0.90082795 | 0.96269291 |
| 1700084J12R | 2.03294768 | 0.02447063 | 0.30724243 | 0.07964599 | 0.93651881 | NA         |
| Mybph       | 20.1762492 | 0.02444524 | 0.42888451 | 0.05699725 | 0.95454738 | 0.98360661 |
| Ccdc157     | 565.022422 | 0.02437628 | 0.25250148 | 0.09653914 | 0.92309239 | 0.97104849 |
| Snx17       | 4325.88713 | 0.02427259 | 0.18370314 | 0.13212941 | 0.89488194 | 0.96038316 |
| Ccdc84      | 587.015707 | 0.02426915 | 0.18078097 | 0.13424616 | 0.89320793 | 0.95975807 |
| Ccnl1       | 4923.87801 | 0.02426658 | 0.19709225 | 0.12312297 | 0.90200972 | 0.96270877 |
| Hspb3       | 2.10698991 | 0.02418632 | 0.28083756 | 0.08612209 | 0.93136936 | NA         |
| Tll2        | 1.08123082 | 0.02418254 | 0.20885158 | 0.11578815 | 0.90782044 | NA         |
| Egln1       | 2194.02033 | 0.02413491 | 0.279381   | 0.08638709 | 0.93115871 | 0.97430464 |
| Psmc2       | 33405.5386 | 0.02409567 | 0.15260433 | 0.15789639 | 0.87453845 | 0.95217723 |
| Rpusd1      | 1010.09164 | 0.02400703 | 0.23429423 | 0.10246529 | 0.91838736 | 0.96904885 |
| Scp2d1      | 1.79768902 | 0.02396664 | 0.29873743 | 0.08022645 | 0.93605715 | NA         |
| Lrig2       | 2672.64008 | 0.02389144 | 0.19844943 | 0.12039057 | 0.90417376 | 0.96369802 |
| Cysltr1     | 1.40901531 | 0.02388681 | 0.18746651 | 0.12741907 | 0.89860872 | NA         |
| 1700101E01F | 155.149574 | 0.02383595 | 0.38327034 | 0.06219096 | 0.95041076 | 0.98198377 |
| Samhd1      | 5763.02967 | 0.0238003  | 0.16026251 | 0.14850825 | 0.88194168 | 0.95515531 |
| Tpm3        | 21126.4082 | 0.02374646 | 0.20388501 | 0.11646988 | 0.90728015 | 0.96492365 |
| Gm16845     | 48.3423647 | 0.02366851 | 0.36095415 | 0.06557207 | 0.94771853 | 0.98083012 |
| Ccdc108     | 2.7336358  | 0.02364353 | 0.28431177 | 0.08316058 | 0.93372385 | NA         |
| H2-Ab1      | 168.1874   | 0.02363149 | 0.42368329 | 0.05577632 | 0.95552    | 0.98381504 |
| Mrps23      | 3292.01067 | 0.0235482  | 0.22817651 | 0.10320169 | 0.9178029  | 0.96891454 |
| Mtif3       | 1231.53576 | 0.02349728 | 0.18967032 | 0.12388487 | 0.90140644 | 0.96269291 |
| Scarna9     | 0.83881642 | 0.02344893 | 0.19266236 | 0.12170999 | 0.9031287  | NA         |
| 4930455C13F | 0.83881642 | 0.02344893 | 0.19266236 | 0.12170999 | 0.9031287  | NA         |

|             |            |            |            |            |            |            |
|-------------|------------|------------|------------|------------|------------|------------|
| Ccdc40      | 216.808152 | 0.02336889 | 0.33372766 | 0.07002382 | 0.9441747  | 0.98001007 |
| Ubxn6       | 2360.88796 | 0.02331838 | 0.18910403 | 0.12330978 | 0.90186179 | 0.96270877 |
| Hic2        | 7077.07148 | 0.02327404 | 0.19673345 | 0.11830243 | 0.90582803 | 0.96413846 |
| Ilvbl       | 740.93887  | 0.02322268 | 0.2412506  | 0.09625958 | 0.92331442 | 0.971175   |
| Zfp867      | 565.10815  | 0.02315998 | 0.2154714  | 0.10748519 | 0.91440408 | 0.96813073 |
| Gorasp2     | 5671.43316 | 0.02311132 | 0.17261983 | 0.13388566 | 0.89349299 | 0.95985595 |
| Lmbr1       | 1392.2361  | 0.02296923 | 0.21698907 | 0.1058543  | 0.91569795 | 0.96836839 |
| Slc2a10     | 1.1620514  | 0.02268252 | 0.20942261 | 0.10830978 | 0.91374997 | NA         |
| R3hdm2      | 4899.70277 | 0.02260604 | 0.17043331 | 0.13263865 | 0.89447917 | 0.96024637 |
| Aifm1       | 8014.39688 | 0.02252892 | 0.1610267  | 0.13990795 | 0.88873272 | 0.95743646 |
| Aqp5        | 14.4960609 | 0.02248038 | 0.42426605 | 0.05298653 | 0.95774264 | 0.98460749 |
| Gm16551     | 3.39802098 | 0.02243137 | 0.36698375 | 0.06112361 | 0.95126077 | NA         |
| Gadl1       | 1.12064196 | 0.02240361 | 0.18325484 | 0.12225387 | 0.90269797 | NA         |
| Suclg2      | 6015.54429 | 0.02234908 | 0.21331691 | 0.10476939 | 0.9165588  | 0.96871937 |
| Srcrb4d     | 858.423695 | 0.02232355 | 0.30842464 | 0.07237926 | 0.94230009 | 0.97906786 |
| Fxr2        | 12825.4341 | 0.02229042 | 0.1671757  | 0.13333526 | 0.89392824 | 0.96010139 |
| Mir5100     | 0.83128329 | 0.02219124 | 0.22087517 | 0.1004696  | 0.91997152 | NA         |
| Tcap        | 0.83128329 | 0.02219124 | 0.22087517 | 0.1004696  | 0.91997152 | NA         |
| Gm13031     | 0.83128329 | 0.02219124 | 0.22087517 | 0.1004696  | 0.91997152 | NA         |
| Edar        | 1.16480447 | 0.0221901  | 0.20950599 | 0.10591631 | 0.91564875 | NA         |
| Ccnh        | 4322.90942 | 0.02218912 | 0.16869935 | 0.13153057 | 0.8953556  | 0.96065096 |
| Gm6938      | 4.0889896  | 0.02213474 | 0.38014042 | 0.05822779 | 0.95356718 | NA         |
| Sec23ip     | 4935.91747 | 0.02213168 | 0.2327063  | 0.09510561 | 0.92423094 | 0.9713263  |
| Slmap       | 7712.65145 | 0.02210475 | 0.21527998 | 0.10267909 | 0.91821767 | 0.96900129 |
| Chrdl2      | 2.00034968 | 0.02202307 | 0.27457461 | 0.08020795 | 0.93607187 | NA         |
| Bmi1        | 2131.25456 | 0.0220217  | 0.1949897  | 0.11293775 | 0.91007991 | 0.96572178 |
| Slc7a10     | 1.4366925  | 0.02201497 | 0.3096444  | 0.07109758 | 0.9433201  | NA         |
| Mapk8ip1    | 822.907    | 0.02196834 | 0.20757646 | 0.10583253 | 0.91571523 | 0.96836839 |
| H2-T23      | 7.9006719  | 0.02186996 | 0.4291378  | 0.05096256 | 0.95935535 | 0.98500986 |
| AB124611    | 4.50367102 | 0.02182605 | 0.37766395 | 0.05779226 | 0.9539141  | NA         |
| Tmie        | 35.7406313 | 0.02182336 | 0.40705728 | 0.05361251 | 0.95724389 | 0.9845304  |
| Gfm2        | 4275.32416 | 0.02176163 | 0.14545099 | 0.14961488 | 0.88106847 | 0.9546085  |
| 4933432G23I | 3.58933831 | 0.0217515  | 0.33325886 | 0.06526907 | 0.94795977 | NA         |
| 4930525D18I | 2.12153803 | 0.02171418 | 0.34167919 | 0.06355138 | 0.94932745 | NA         |
| Tbc1d17     | 1890.09992 | 0.02167847 | 0.17701425 | 0.12246735 | 0.9025289  | 0.96299699 |
| Ocm         | 1.81023885 | 0.02165795 | 0.27275893 | 0.07940326 | 0.93671188 | NA         |
| Serpina3k   | 0.84597216 | 0.02145786 | 0.18106043 | 0.11851217 | 0.90566185 | NA         |
| Tfap2b      | 0.84597216 | 0.02145786 | 0.18106043 | 0.11851217 | 0.90566185 | NA         |
| Mmrn1       | 0.84597216 | 0.02145786 | 0.18106043 | 0.11851217 | 0.90566185 | NA         |
| Ube2dn12    | 0.84597216 | 0.02145786 | 0.18106043 | 0.11851217 | 0.90566185 | NA         |
| Rnf19b      | 6497.27479 | 0.02142599 | 0.22521891 | 0.09513405 | 0.92420836 | 0.9713263  |

|             |            |            |            |            |            |            |
|-------------|------------|------------|------------|------------|------------|------------|
| Hadha       | 9733.60641 | 0.02141411 | 0.15398362 | 0.13906742 | 0.88939687 | 0.95795891 |
| Ii19        | 0.74269294 | 0.02140113 | 0.18000655 | 0.11889082 | 0.90536185 | NA         |
| Aim1l       | 735.252702 | 0.02139969 | 0.29854451 | 0.07168008 | 0.94285651 | 0.97951511 |
| Psmid9      | 1414.6207  | 0.02136718 | 0.1812899  | 0.11786194 | 0.90617705 | 0.96427804 |
| Fam136a     | 7976.45847 | 0.02129673 | 0.1809663  | 0.11768338 | 0.90631853 | 0.96428995 |
| Mc5r        | 23.0259772 | 0.02114112 | 0.41286508 | 0.05120589 | 0.95916146 | 0.98500986 |
| Gm111186    | 1.17219685 | 0.02113086 | 0.27078767 | 0.07803481 | 0.93780036 | NA         |
| Lypd6       | 149.580721 | 0.02112646 | 0.35314137 | 0.05982438 | 0.9522955  | 0.9826254  |
| Mcl1        | 36244.7999 | 0.0210997  | 0.26771828 | 0.07881308 | 0.9371813  | 0.97680712 |
| 4933426M11  | 4821.74515 | 0.02107853 | 0.23729034 | 0.08883014 | 0.92921691 | 0.97353986 |
| 2310003H01l | 963.943421 | 0.0210018  | 0.1950854  | 0.10765438 | 0.91426986 | 0.96812002 |
| Actr10      | 4539.54857 | 0.02087145 | 0.18267692 | 0.11425336 | 0.90903695 | 0.96531171 |
| Golga5      | 3682.60669 | 0.02086201 | 0.15154337 | 0.13766359 | 0.89050629 | 0.9584185  |
| Fabp9       | 1.16002441 | 0.02084781 | 0.24107809 | 0.08647743 | 0.9310869  | NA         |
| Snap29      | 2149.49384 | 0.02075915 | 0.17749618 | 0.11695545 | 0.90689536 | 0.96458038 |
| Cyp2e1      | 1.18914935 | 0.02066382 | 0.24474273 | 0.08443078 | 0.93271394 | NA         |
| Dnajc19     | 2539.23636 | 0.02062928 | 0.18684329 | 0.11040953 | 0.91208459 | 0.9667935  |
| Fkbp11      | 1134.49261 | 0.02055173 | 0.25513893 | 0.08055113 | 0.93579894 | 0.97629205 |
| Fbxo42      | 4648.10008 | 0.02053171 | 0.21355398 | 0.09614297 | 0.92340703 | 0.971175   |
| Top3b       | 7134.00164 | 0.02052194 | 0.18736141 | 0.10953131 | 0.91278109 | 0.96720215 |
| Cyp2c70     | 100.730245 | 0.02051275 | 0.39311994 | 0.05217936 | 0.95838578 | 0.98484816 |
| Smарcb1     | 6052.23638 | 0.02048649 | 0.18978993 | 0.10794299 | 0.91404091 | 0.96800942 |
| Wdfy2       | 447.289206 | 0.02048231 | 0.27379732 | 0.07480828 | 0.94036725 | 0.97844661 |
| Med27       | 1279.57265 | 0.0203933  | 0.21328788 | 0.09561396 | 0.92382718 | 0.9712368  |
| Gm3435      | 7.62120049 | 0.02036435 | 0.41855737 | 0.04865366 | 0.9611953  | 0.98598603 |
| Pofut1      | 2544.23792 | 0.02032842 | 0.19557909 | 0.10393965 | 0.91721724 | 0.96885548 |
| Myod1       | 1.12501594 | 0.02027811 | 0.26627794 | 0.07615391 | 0.93929665 | NA         |
| Golim4      | 847.189476 | 0.02017968 | 0.29219913 | 0.06906139 | 0.94494076 | 0.98017434 |
| Tgm4        | 1.47132359 | 0.02012936 | 0.31390873 | 0.06412488 | 0.94887079 | NA         |
| Gm13051     | 458.040094 | 0.02008492 | 0.32779974 | 0.06127192 | 0.95114266 | 0.98234837 |
| Hist1h4b    | 10.2396338 | 0.02001279 | 0.42737136 | 0.04682764 | 0.9626506  | 0.98660086 |
| G6pc3       | 863.441033 | 0.02000122 | 0.23930305 | 0.08358113 | 0.93338947 | 0.97475922 |
| Spcs2       | 7906.32018 | 0.01992354 | 0.16040452 | 0.12420808 | 0.90115052 | 0.96269291 |
| D6Wsu163e   | 1423.55253 | 0.01990222 | 0.15962688 | 0.12467962 | 0.90077719 | 0.96269291 |
| Pkd2l2      | 3.87630807 | 0.019881   | 0.38548885 | 0.05157347 | 0.95886856 | NA         |
| Arhgap29    | 644.600397 | 0.0197604  | 0.3242361  | 0.06094449 | 0.95140341 | 0.98235672 |
| 2200002J24R | 2.30397568 | 0.01970325 | 0.24226877 | 0.08132807 | 0.93518105 | NA         |
| Strc        | 2.00608637 | 0.01965843 | 0.30548134 | 0.06435231 | 0.94868971 | NA         |
| Atp8a1      | 2228.74408 | 0.01963431 | 0.28937907 | 0.0678498  | 0.9459052  | 0.98045536 |
| Zdhhc5      | 5845.63979 | 0.01963251 | 0.20829948 | 0.09425137 | 0.92490948 | 0.97150501 |
| Ndufa5      | 3407.04518 | 0.01963115 | 0.19731469 | 0.09949159 | 0.92074796 | 0.96990703 |

|             |            |            |            |            |            |            |
|-------------|------------|------------|------------|------------|------------|------------|
| Taf4b       | 2810.69729 | 0.019465   | 0.18923565 | 0.10286117 | 0.91807316 | 0.96891454 |
| Ppara       | 28.9440095 | 0.0194544  | 0.42472834 | 0.04580433 | 0.96346621 | 0.98668128 |
| Fbxo2       | 406.90532  | 0.01941328 | 0.29091122 | 0.06673268 | 0.94679452 | 0.98072348 |
| 1700024P16F | 5.23735609 | 0.01930408 | 0.39745906 | 0.04856872 | 0.961263   | NA         |
| Tunar       | 819.749769 | 0.01928845 | 0.36363961 | 0.05304278 | 0.95769783 | 0.98460749 |
| Apoa1       | 11.844967  | 0.01922709 | 0.42134177 | 0.045633   | 0.96360277 | 0.98668128 |
| Ptov1       | 5909.13659 | 0.01920862 | 0.19188854 | 0.100103   | 0.92026255 | 0.96990703 |
| Tbc1d23     | 3192.83055 | 0.01920605 | 0.25860564 | 0.07426772 | 0.94079736 | 0.97855259 |
| Thpo        | 277.865029 | 0.01919658 | 0.30992909 | 0.06193862 | 0.95061171 | 0.98212615 |
| Cdc42ep4    | 2616.51759 | 0.01904126 | 0.26161787 | 0.07278271 | 0.94197903 | 0.97906786 |
| Angel2      | 3160.02806 | 0.01903116 | 0.16831051 | 0.11307173 | 0.90997369 | 0.96572178 |
| 1700093K21F | 2.16772753 | 0.01902373 | 0.31207614 | 0.06095862 | 0.95139216 | NA         |
| Med12l      | 1202.076   | 0.01897281 | 0.31329507 | 0.0605589  | 0.9517105  | 0.98252684 |
| Kdm1b       | 2141.11431 | 0.01897048 | 0.18208738 | 0.10418341 | 0.9170238  | 0.96879329 |
| Alox12b     | 27.055904  | 0.01893281 | 0.4173324  | 0.04536626 | 0.96381538 | 0.98668128 |
| Gm19345     | 14.8216245 | 0.01879343 | 0.42729608 | 0.04398222 | 0.96491858 | 0.98668128 |
| Cog8        | 2175.29863 | 0.01878495 | 0.2363973  | 0.07946348 | 0.93666398 | 0.97680133 |
| Ccni        | 6722.73365 | 0.01877651 | 0.21333886 | 0.08801259 | 0.92986667 | 0.97394786 |
| Tmem8c      | 1.1178602  | 0.01877252 | 0.26602851 | 0.07056582 | 0.94374331 | NA         |
| B630019K06F | 13.5324262 | 0.01869671 | 0.42247253 | 0.04425545 | 0.96470078 | 0.98668128 |
| Exoc6       | 1710.87142 | 0.01868163 | 0.22020195 | 0.0848386  | 0.9323897  | 0.97430464 |
| Sgta        | 5719.06616 | 0.01858553 | 0.20515829 | 0.09059117 | 0.92781745 | 0.97272899 |
| Fut10       | 1172.58112 | 0.01856947 | 0.2155858  | 0.08613493 | 0.93135915 | 0.97430464 |
| Nipal2      | 75.0320709 | 0.01856458 | 0.38222684 | 0.04856954 | 0.96126234 | 0.98598976 |
| A630020A06  | 24.1302777 | 0.01856147 | 0.4099188  | 0.04528084 | 0.96388346 | 0.98668128 |
| Etf1        | 36482.3679 | 0.01842852 | 0.17739743 | 0.10388269 | 0.91726244 | 0.96885548 |
| Erc1        | 4922.92585 | 0.01841244 | 0.23774405 | 0.07744647 | 0.93826838 | 0.97736027 |
| Sugct       | 7.21918738 | 0.01835806 | 0.42522685 | 0.04317238 | 0.96556412 | 0.98699467 |
| Tyrobp      | 2.08789837 | 0.01829516 | 0.30763593 | 0.05947016 | 0.95257763 | NA         |
| 1700001K23F | 5.15350808 | 0.01827698 | 0.38213981 | 0.04782799 | 0.96185333 | NA         |
| Dad1        | 3915.09636 | 0.01827121 | 0.21546763 | 0.08479792 | 0.93242204 | 0.97430464 |
| Tnni2       | 1.09853201 | 0.01813534 | 0.23879849 | 0.07594412 | 0.93946356 | NA         |
| Tyms        | 8776.58041 | 0.01811698 | 0.19312115 | 0.0938115  | 0.9252589  | 0.9715622  |
| Paip1       | 5957.30503 | 0.01808232 | 0.19770253 | 0.09146224 | 0.92712531 | 0.97259347 |
| Cryl1       | 458.962835 | 0.01808231 | 0.23266041 | 0.07771976 | 0.93805097 | 0.97735613 |
| Ifitm5      | 74.1216781 | 0.01801743 | 0.36808124 | 0.04894961 | 0.96095945 | 0.9858688  |
| Tfap2e      | 23.342047  | 0.01795337 | 0.41410198 | 0.04335495 | 0.96541859 | 0.9869787  |
| Gm5458      | 6.45096238 | 0.01794449 | 0.38316267 | 0.04683257 | 0.96264667 | 0.98660086 |
| Zmynd15     | 24.482369  | 0.0179119  | 0.41368083 | 0.04329885 | 0.96546331 | 0.9869787  |
| Mrpl16      | 2157.17221 | 0.01790898 | 0.18081711 | 0.0990447  | 0.92110278 | 0.97000537 |
| Snupn       | 1755.77142 | 0.0178011  | 0.19392189 | 0.09179523 | 0.92686073 | 0.97238317 |

|             |            |            |            |            |            |            |
|-------------|------------|------------|------------|------------|------------|------------|
| Fnbp1l      | 9223.24323 | 0.01779488 | 0.17887891 | 0.09948004 | 0.92075713 | 0.96990703 |
| Dnpep       | 7114.06779 | 0.01773765 | 0.22300634 | 0.07953879 | 0.93660408 | 0.97680133 |
| Bcs1l       | 1114.40944 | 0.01766905 | 0.20805169 | 0.08492625 | 0.93232002 | 0.97430464 |
| Txlna       | 9320.67024 | 0.01765958 | 0.17943766 | 0.09841622 | 0.9216018  | 0.97033375 |
| Prpf38b     | 8953.57475 | 0.01763135 | 0.15771296 | 0.11179392 | 0.91098681 | 0.96617289 |
| Tsr2        | 2982.162   | 0.01758755 | 0.17953425 | 0.0979621  | 0.92196239 | 0.97043051 |
| 0610007P14F | 4482.13301 | 0.01758617 | 0.16620935 | 0.10580732 | 0.91573523 | 0.96836839 |
| Ap1s1       | 3966.07511 | 0.01753881 | 0.16966317 | 0.10337428 | 0.91766592 | 0.96891454 |
| Ncln        | 4509.90224 | 0.01748388 | 0.20989339 | 0.08329884 | 0.93361392 | 0.97492815 |
| Tbx21       | 402.9856   | 0.01732306 | 0.26923852 | 0.06434096 | 0.94869874 | 0.98128695 |
| Zfp3        | 315.433012 | 0.01713515 | 0.21720546 | 0.07888911 | 0.93712082 | 0.97680712 |
| Gbp2b       | 2.714685   | 0.01704716 | 0.21725033 | 0.07846782 | 0.93745593 | NA         |
| Ttll12      | 3616.97678 | 0.01687219 | 0.19575768 | 0.08618917 | 0.93131604 | 0.97430464 |
| Scn4a       | 9.45369545 | 0.01670439 | 0.41172096 | 0.04057213 | 0.96763701 | 0.98780003 |
| Tmed8       | 2788.06615 | 0.01670159 | 0.23515076 | 0.07102504 | 0.94337782 | 0.97979487 |
| Palmd       | 1.20346083 | 0.01667175 | 0.21083725 | 0.07907401 | 0.93697375 | NA         |
| Slc1a2      | 1.45877376 | 0.01664025 | 0.31001151 | 0.05367623 | 0.95719312 | NA         |
| Eif3k       | 21465.3166 | 0.01663141 | 0.20673283 | 0.08044883 | 0.93588029 | 0.97631143 |
| Scarna6     | 4.71475965 | 0.01661134 | 0.38848018 | 0.04275981 | 0.965893   | NA         |
| Cda         | 2.98191148 | 0.01652581 | 0.33057148 | 0.04999163 | 0.96012906 | NA         |
| Rap1gap     | 1696.63538 | 0.01651863 | 0.30244721 | 0.05461658 | 0.95644393 | 0.98405248 |
| Rhbdd1      | 1336.68319 | 0.01650059 | 0.26380309 | 0.06254887 | 0.95012575 | 0.98181975 |
| Snf8        | 3118.34676 | 0.0162514  | 0.20982041 | 0.07745387 | 0.93826249 | 0.97736027 |
| Al848285    | 375.066563 | 0.01615463 | 0.39541945 | 0.04085441 | 0.96741196 | 0.98780003 |
| Exoc5       | 3950.88453 | 0.01611935 | 0.17943476 | 0.08983405 | 0.92841909 | 0.97296619 |
| Suclg1      | 8864.76012 | 0.01606573 | 0.16560533 | 0.09701217 | 0.92271673 | 0.97078465 |
| Urod        | 4209.48132 | 0.01599366 | 0.20826912 | 0.07679323 | 0.93878804 | 0.97776256 |
| Bysl        | 4377.28401 | 0.0159185  | 0.23041773 | 0.0690854  | 0.94492165 | 0.98017434 |
| Txnl1       | 13276.7921 | 0.01587936 | 0.16267466 | 0.09761424 | 0.92223861 | 0.97047859 |
| Sertad4     | 170.43841  | 0.01579129 | 0.33962259 | 0.04649659 | 0.96291445 | 0.98660086 |
| 2310061I04R | 1695.44752 | 0.01576024 | 0.1869076  | 0.08432103 | 0.93280119 | 0.97453754 |
| Pxylp1      | 367.468408 | 0.01575031 | 0.27030157 | 0.05826941 | 0.95353404 | 0.98295517 |
| Acbd3       | 3395.70543 | 0.01559853 | 0.16952529 | 0.09201299 | 0.92668772 | 0.97238317 |
| Mir6351     | 0.88462853 | 0.0155446  | 0.18140125 | 0.0856918  | 0.93171142 | NA         |
| Cdk5rap1    | 1702.96023 | 0.01549971 | 0.17089937 | 0.09069493 | 0.927735   | 0.97272899 |
| M6pr        | 13599.1199 | 0.01546088 | 0.16677015 | 0.09270773 | 0.92613575 | 0.97229279 |
| 1700060C20F | 2.7112515  | 0.01544112 | 0.31890238 | 0.04841958 | 0.96138186 | NA         |
| Tecpr1      | 1604.21342 | 0.0154109  | 0.17709495 | 0.08702056 | 0.93065517 | 0.97430464 |
| Ndufa7      | 11382.9444 | 0.01537945 | 0.24190764 | 0.06357573 | 0.94930806 | 0.98150429 |
| Kcnf1       | 79.9684768 | 0.01533607 | 0.42208821 | 0.03633381 | 0.97101619 | 0.98882017 |
| Gm10451     | 576.717181 | 0.01529742 | 0.21684234 | 0.07054627 | 0.94375887 | 0.97986765 |

|             |            |            |            |            |            |            |
|-------------|------------|------------|------------|------------|------------|------------|
| Foxf2       | 0.86492296 | 0.01524979 | 0.19402997 | 0.07859505 | 0.93735473 | NA         |
| Bend5       | 77.9388996 | 0.01521407 | 0.3394115  | 0.04482485 | 0.96424692 | 0.98668128 |
| Cyp46a1     | 30.6759283 | 0.0151902  | 0.39293911 | 0.03865789 | 0.96916315 | 0.98809782 |
| Fbxo7       | 1627.99566 | 0.01517974 | 0.17537114 | 0.08655779 | 0.93102302 | 0.97430464 |
| Slc1a3      | 116.48378  | 0.01516931 | 0.4097574  | 0.03702021 | 0.97046889 | 0.98862285 |
| Rbm14       | 6057.09353 | 0.01509082 | 0.21454747 | 0.0703379  | 0.94392472 | 0.97986765 |
| Shfm1       | 7310.07976 | 0.01508549 | 0.23967258 | 0.06294208 | 0.94981263 | 0.98162665 |
| Eif1        | 14652.9625 | 0.01501825 | 0.15959867 | 0.09410009 | 0.92502964 | 0.97150501 |
| Cry2        | 1592.30242 | 0.01498042 | 0.20063733 | 0.07466416 | 0.94048192 | 0.97844661 |
| Med8        | 2988.52323 | 0.01496209 | 0.1591265  | 0.09402641 | 0.92508817 | 0.97150501 |
| 2310036O22I | 5052.13048 | 0.01490118 | 0.19929069 | 0.07477108 | 0.94039685 | 0.97844661 |
| Gli2        | 6221.45744 | 0.01487814 | 0.23134646 | 0.06431108 | 0.94872253 | 0.98128695 |
| Rasd2       | 164.965395 | 0.01443891 | 0.36876486 | 0.03915478 | 0.96876698 | 0.98792827 |
| 1110034G24I | 572.29562  | 0.01438652 | 0.23554608 | 0.06107731 | 0.95129764 | 0.98235672 |
| Nufip2      | 13072.4332 | 0.01436979 | 0.21081298 | 0.0681637  | 0.94565533 | 0.98027294 |
| G6pd2       | 4.24745005 | 0.01435374 | 0.40123487 | 0.03577392 | 0.97146263 | NA         |
| Syt17       | 40.8271959 | 0.0143024  | 0.4263534  | 0.03354588 | 0.97323928 | 0.98952887 |
| Dhrs1       | 1607.20431 | 0.01428127 | 0.21873344 | 0.06529076 | 0.9479425  | 0.98083012 |
| Rnf25       | 1396.39516 | 0.01424923 | 0.22500492 | 0.06332854 | 0.94950489 | 0.98150429 |
| Gm14440     | 1.17897521 | 0.01418901 | 0.27097702 | 0.05236242 | 0.95823992 | NA         |
| Lancl1      | 2935.87955 | 0.01416548 | 0.20960821 | 0.06758076 | 0.94611937 | 0.98057263 |
| Gpm6b       | 5.21611331 | 0.01415008 | 0.37130433 | 0.03810913 | 0.96960067 | NA         |
| Plaa        | 16960.988  | 0.01409096 | 0.1620948  | 0.08693038 | 0.93072685 | 0.97430464 |
| Emc6        | 4754.2725  | 0.0140673  | 0.23432326 | 0.06003374 | 0.95212876 | 0.98262097 |
| Atg5        | 4123.99402 | 0.01404428 | 0.16364408 | 0.08582208 | 0.93160786 | 0.97430464 |
| Tuba3       | 1.14747458 | 0.01403416 | 0.2114319  | 0.06637676 | 0.94707787 | NA         |
| Slc33a1     | 1569.1778  | 0.01395419 | 0.21047424 | 0.0662988  | 0.94713994 | 0.98076289 |
| Ube2g2      | 2076.4273  | 0.01392753 | 0.18938752 | 0.07353984 | 0.94137654 | 0.97869679 |
| Rps6ka3     | 3130.6396  | 0.01375606 | 0.22096683 | 0.06225395 | 0.9503606  | 0.98198377 |
| 4930503L19F | 1963.45018 | 0.01367318 | 0.22994535 | 0.05946273 | 0.95258355 | 0.9827922  |
| Cstf2       | 8771.74631 | 0.01341426 | 0.17710153 | 0.07574331 | 0.93962332 | 0.97818197 |
| Rfc2        | 6796.30763 | 0.01338122 | 0.17974921 | 0.07444381 | 0.94065725 | 0.9784723  |
| Gpld1       | 79.8047051 | 0.01329211 | 0.42765824 | 0.03108115 | 0.97520482 | 0.99055586 |
| BB123696    | 10.0641088 | 0.01327204 | 0.38659778 | 0.03433035 | 0.97261372 | 0.98939312 |
| Rbfox2      | 10317.7474 | 0.01324931 | 0.19323668 | 0.0685652  | 0.94533572 | 0.98027294 |
| Nxt1        | 2917.9015  | 0.01320566 | 0.17661746 | 0.07476982 | 0.94039785 | 0.97844661 |
| Bend3       | 2796.24955 | 0.01316541 | 0.22695915 | 0.05800785 | 0.95374237 | 0.98307468 |
| 9130227L01F | 2.17450588 | 0.01314229 | 0.30825545 | 0.04263441 | 0.96599296 | NA         |
| Slc35e1     | 5401.52458 | 0.01312507 | 0.20752863 | 0.06324464 | 0.9495717  | 0.98150811 |
| Fam20b      | 2806.79054 | 0.01310072 | 0.18634481 | 0.07030365 | 0.94395198 | 0.97986765 |
| Kif4-ps     | 1.55654684 | 0.01309161 | 0.25568646 | 0.05120181 | 0.95916471 | NA         |

|             |            |            |            |            |            |            |
|-------------|------------|------------|------------|------------|------------|------------|
| Cpa1        | 0.85061147 | 0.01307954 | 0.19320823 | 0.06769661 | 0.94602715 | NA         |
| Sdr42e1     | 72.6837895 | 0.01304105 | 0.34812223 | 0.03746112 | 0.97011734 | 0.98842264 |
| Atg16l1     | 4196.04287 | 0.01301297 | 0.16512068 | 0.07880883 | 0.93718468 | 0.97680712 |
| Lama2       | 5.65578493 | 0.01294807 | 0.35435763 | 0.03653956 | 0.97085213 | NA         |
| Idh2        | 17707.5432 | 0.01293401 | 0.22059176 | 0.05863323 | 0.95324424 | 0.98295517 |
| Chst13      | 7.39135138 | 0.01292728 | 0.42772191 | 0.03022356 | 0.97588876 | 0.99061251 |
| Commd4      | 4232.62162 | 0.01292668 | 0.19685673 | 0.06566542 | 0.9476442  | 0.98081963 |
| Krt84       | 1.4812324  | 0.0129017  | 0.25689385 | 0.05022193 | 0.95994554 | NA         |
| Cc2d2a      | 1289.48933 | 0.01287867 | 0.2477012  | 0.05199276 | 0.95853446 | 0.98484816 |
| Sdcbp       | 5392.99192 | 0.01275688 | 0.22457653 | 0.05680417 | 0.95470119 | 0.98360661 |
| Fam19a4     | 229.880269 | 0.01273679 | 0.39765357 | 0.03202987 | 0.97444823 | 0.98998135 |
| Rangap1     | 17295.6532 | 0.01271568 | 0.18633085 | 0.06824249 | 0.94559261 | 0.98027294 |
| Zbtb21      | 2557.66041 | 0.01265874 | 0.21528457 | 0.05880004 | 0.95311137 | 0.98295517 |
| Rhbg        | 319.624098 | 0.01262602 | 0.36190138 | 0.03488801 | 0.97216904 | 0.98936861 |
| 4930505A04f | 1.50809371 | 0.01262207 | 0.22296491 | 0.05661011 | 0.95485578 | NA         |
| Gpr179      | 149.634411 | 0.0125844  | 0.30198373 | 0.04167243 | 0.96675983 | 0.98762454 |
| Pwwp2b      | 158.40153  | 0.01256854 | 0.26634267 | 0.04718938 | 0.9623623  | 0.98657422 |
| Ap1s2       | 2168.61647 | 0.01253326 | 0.31049408 | 0.04036554 | 0.96780171 | 0.98780003 |
| Kcnq4       | 20.5939545 | 0.01237864 | 0.43029622 | 0.02876771 | 0.97704985 | 0.99086475 |
| Clcna       | 211.615262 | 0.01232273 | 0.3250799  | 0.03790676 | 0.96976202 | 0.98814768 |
| Fabp12      | 9.14951722 | 0.01224898 | 0.3979743  | 0.03077833 | 0.97544632 | 0.99060705 |
| Dusp26      | 15.6920755 | 0.01204477 | 0.43199637 | 0.02788165 | 0.97775654 | 0.99086475 |
| Mir3960     | 7.50669099 | 0.01201125 | 0.4215794  | 0.02849108 | 0.97727049 | 0.99086475 |
| Dhx34       | 1088.68206 | 0.01195218 | 0.1871493  | 0.0638644  | 0.9490782  | 0.98146102 |
| Hdac3       | 5185.359   | 0.01194504 | 0.16487845 | 0.07244753 | 0.94224576 | 0.97906786 |
| Esrrb       | 46739.2164 | 0.01191081 | 0.18707775 | 0.06366772 | 0.94923481 | 0.98150429 |
| Fbxo30      | 6275.74244 | 0.01190366 | 0.20648933 | 0.05764781 | 0.95402916 | 0.98323995 |
| Pacs1       | 1540.62899 | 0.01187934 | 0.17940281 | 0.06621604 | 0.94720582 | 0.98076289 |
| 11-Mar      | 20.9786262 | 0.01179139 | 0.4304023  | 0.0273962  | 0.97814373 | 0.99086475 |
| Esyt1       | 5590.45548 | 0.01176717 | 0.21054207 | 0.05588987 | 0.95542954 | 0.98381504 |
| 1700013G24l | 2.11851963 | 0.01171661 | 0.3416846  | 0.03429071 | 0.97264533 | NA         |
| Ilf2        | 16429.9607 | 0.01171396 | 0.16585302 | 0.07062856 | 0.94369338 | 0.97986765 |
| Gm4827      | 16.8388825 | 0.01168179 | 0.41312905 | 0.02827638 | 0.97744172 | 0.99086475 |
| A330032B11l | 1.49340484 | 0.01150912 | 0.28801922 | 0.03995957 | 0.96812536 | NA         |
| Igf2bp3     | 12359.787  | 0.01149768 | 0.1534449  | 0.07493034 | 0.94027014 | 0.97844661 |
| Mrps18b     | 3543.90547 | 0.01148275 | 0.20163015 | 0.05694957 | 0.95458537 | 0.98360661 |
| Zfp580      | 261.119155 | 0.01144038 | 0.23597457 | 0.0484814  | 0.96133259 | 0.98599678 |
| Dao         | 4.59424714 | 0.01129344 | 0.35835627 | 0.03151457 | 0.97485918 | NA         |
| Ccin        | 7.81579125 | 0.01118683 | 0.42050009 | 0.02660364 | 0.97877587 | 0.99095946 |
| Calcr1      | 1.76505624 | 0.01117559 | 0.3020195  | 0.03700286 | 0.97048272 | NA         |
| Mtbp        | 4022.59656 | 0.01116936 | 0.1526779  | 0.07315634 | 0.94168171 | 0.97888318 |



|             |            |            |            |            |            |            |
|-------------|------------|------------|------------|------------|------------|------------|
| Kdelc1      | 3214.46238 | 0.01114741 | 0.19747058 | 0.05645101 | 0.95498253 | 0.98369871 |
| Tmem27      | 0.83806164 | 0.01113137 | 0.19247223 | 0.05783365 | 0.95388113 | NA         |
| Zfp663      | 1.12776901 | 0.01105143 | 0.20869651 | 0.05295456 | 0.95776812 | NA         |
| U2af2       | 15174.8221 | 0.01102327 | 0.17837308 | 0.06179893 | 0.95072296 | 0.98217582 |
| Atp13a1     | 5515.42552 | 0.0109704  | 0.24107638 | 0.04550589 | 0.96370408 | 0.98668128 |
| Fat4        | 1.52779928 | 0.01086442 | 0.19144785 | 0.0567487  | 0.95474538 | NA         |
| BC048507    | 1.48349603 | 0.01085513 | 0.28784239 | 0.03771208 | 0.96991725 | NA         |
| Tmem189     | 1547.2232  | 0.0107892  | 0.18266669 | 0.05906493 | 0.95290039 | 0.98295517 |
| Shq1        | 2281.36515 | 0.0107578  | 0.16846789 | 0.06385667 | 0.94908436 | 0.98146102 |
| Hcn4        | 32.0055749 | 0.01073726 | 0.40383821 | 0.02658802 | 0.97878833 | 0.99095946 |
| Sh3bp4      | 4165.89569 | 0.01073431 | 0.25395727 | 0.04226817 | 0.96628492 | 0.98742915 |
| 4933428G20I | 2.07397973 | 0.01067391 | 0.31231053 | 0.03417724 | 0.97273581 | NA         |
| Adar        | 4217.18988 | 0.01047926 | 0.20984737 | 0.04993752 | 0.96017218 | 0.98552159 |
| Lrrc46      | 55.4975362 | 0.01047882 | 0.36881717 | 0.02841195 | 0.97733359 | 0.99086475 |
| Kank4       | 815.496412 | 0.01045907 | 0.26744495 | 0.03910737 | 0.96880479 | 0.98792827 |
| Acads       | 4736.90972 | 0.01042889 | 0.15093968 | 0.06909308 | 0.94491553 | 0.98017434 |
| Ddt         | 4022.38978 | 0.01034492 | 0.24464384 | 0.04228564 | 0.96627099 | 0.98742915 |
| Hagh        | 2106.95523 | 0.0102632  | 0.23191895 | 0.04425339 | 0.96470242 | 0.98668128 |
| Psg16       | 1.75514743 | 0.01021397 | 0.29819386 | 0.03425278 | 0.97267558 | NA         |
| Ndufa4      | 15699.0091 | 0.01016687 | 0.19483939 | 0.05218078 | 0.95838465 | 0.98484816 |
| E230029C05F | 3.27613966 | 0.01008612 | 0.33162273 | 0.03041445 | 0.97573652 | NA         |
| Dcp1a       | 2960.87604 | 0.00999263 | 0.19357809 | 0.05162065 | 0.95883097 | 0.98499012 |
| Pon2        | 155.59475  | 0.00998127 | 0.42209574 | 0.02364694 | 0.98113423 | 0.99148577 |
| Kcna6       | 3.41581806 | 0.00996533 | 0.34545439 | 0.02884703 | 0.97698659 | NA         |
| Fbxo15      | 29767.435  | 0.00988338 | 0.18635885 | 0.05303414 | 0.95770471 | 0.98460749 |
| Pde7a       | 3741.65791 | 0.00987223 | 0.2165882  | 0.04558065 | 0.96364449 | 0.98668128 |
| Mtmr10      | 1887.78108 | 0.00974105 | 0.16721462 | 0.05825477 | 0.95354569 | 0.98295517 |
| Dhx8        | 6662.31011 | 0.00970675 | 0.23385497 | 0.04150754 | 0.96689128 | 0.98762454 |
| Eaf2        | 111.085089 | 0.00955809 | 0.32941403 | 0.02901544 | 0.97685227 | 0.99086475 |
| Snca        | 29.8128446 | 0.00951641 | 0.42715112 | 0.0222788  | 0.98222556 | 0.99185647 |
| Polr1e      | 2904.80223 | 0.00945748 | 0.17864044 | 0.05294143 | 0.95777857 | 0.98460749 |
| Rgl1        | 159.297995 | 0.00934499 | 0.28569647 | 0.03270949 | 0.97390626 | 0.98975179 |
| E330017L17R | 1.23055879 | 0.00923036 | 0.21442223 | 0.04304761 | 0.96566358 | NA         |
| Osmr        | 13.8580005 | 0.00922695 | 0.35564205 | 0.02594449 | 0.97930161 | 0.99113137 |
| Larp6       | 14.8141596 | 0.009218   | 0.43217217 | 0.02132946 | 0.98298285 | 0.99229302 |
| Tex22       | 1.49879893 | 0.00921686 | 0.25442365 | 0.03622641 | 0.97110183 | NA         |
| Atp6v1b2    | 15918.8566 | 0.00921626 | 0.19091794 | 0.04827341 | 0.96149834 | 0.98603672 |
| Ebag9       | 876.515396 | 0.00917819 | 0.20612272 | 0.04452778 | 0.96448371 | 0.98668128 |
| Nifk        | 7668.01142 | 0.00906521 | 0.17366021 | 0.05220083 | 0.95836867 | 0.98484816 |
| Supt4a      | 2569.15621 | 0.00905403 | 0.23755547 | 0.03811331 | 0.96959734 | 0.98814768 |
| Tprn        | 2001.9825  | 0.00891006 | 0.22874388 | 0.03895211 | 0.96892857 | 0.98798821 |

|             |            |            |            |            |            |            |
|-------------|------------|------------|------------|------------|------------|------------|
| Lrat        | 9.72251482 | 0.00889088 | 0.42239145 | 0.0210489  | 0.98320665 | 0.99233168 |
| Pole4       | 9105.03712 | 0.00884605 | 0.15190845 | 0.05823276 | 0.95356322 | 0.98295517 |
| Gm1943      | 126.058501 | 0.00875407 | 0.29723312 | 0.02945185 | 0.97650422 | 0.99086475 |
| Tmem171     | 8.58130149 | 0.00868326 | 0.36435764 | 0.02383169 | 0.98098686 | 0.99148577 |
| Ciz1        | 1136.16013 | 0.00860379 | 0.19013126 | 0.04525182 | 0.96390659 | 0.98668128 |
| Naaa        | 453.003685 | 0.00860182 | 0.2098536  | 0.0409896  | 0.96730419 | 0.98780003 |
| Tnip2       | 1445.55071 | 0.0084522  | 0.18676464 | 0.04525587 | 0.96390336 | 0.98668128 |
| Mapk1ip1    | 1058.25093 | 0.00843006 | 0.21172463 | 0.03981614 | 0.96823971 | 0.98780003 |
| Copa        | 19194.7699 | 0.00841417 | 0.17072882 | 0.04928385 | 0.96069309 | 0.98579599 |
| Kank3       | 4589.36006 | 0.00829494 | 0.25044378 | 0.03312095 | 0.97357814 | 0.98955288 |
| Fnip2       | 4341.83323 | 0.00829016 | 0.25837835 | 0.03208534 | 0.97440399 | 0.98998135 |
| Pou4f2      | 91.7014952 | 0.00814468 | 0.42144284 | 0.0193257  | 0.98458128 | 0.99301015 |
| Ss18        | 9345.18997 | 0.00806696 | 0.1500588  | 0.05375866 | 0.95712745 | 0.9845304  |
| Phax        | 4303.21246 | 0.00805114 | 0.17878634 | 0.04503221 | 0.96408163 | 0.98668128 |
| Mfsd3       | 296.366606 | 0.00804336 | 0.23613282 | 0.03406284 | 0.97282704 | 0.98939312 |
| Zc3h15      | 9843.46201 | 0.00803522 | 0.15194412 | 0.05288271 | 0.95782536 | 0.98460749 |
| Rtel1       | 6641.48647 | 0.00785269 | 0.20667608 | 0.03799514 | 0.96969156 | 0.98814768 |
| Ift57       | 1166.55598 | 0.0078525  | 0.23768439 | 0.03303749 | 0.97364469 | 0.98955288 |
| Gprin1      | 3.3411679  | 0.00778867 | 0.36855384 | 0.02113307 | 0.9831395  | NA         |
| 8430408G22I | 1.55176678 | 0.00777151 | 0.28909443 | 0.02688225 | 0.97855365 | NA         |
| Ttll11      | 2.05702723 | 0.00766476 | 0.33286325 | 0.02302676 | 0.98162893 | NA         |
| Nxf1        | 12428.5099 | 0.00760734 | 0.17995687 | 0.04227316 | 0.96628094 | 0.98742915 |
| Rpp21       | 1913.05535 | 0.00751502 | 0.25841566 | 0.02908112 | 0.97679989 | 0.99086475 |
| BC028528    | 143.575327 | 0.00721506 | 0.35006199 | 0.02061081 | 0.98355612 | 0.99251303 |
| Alg6        | 3687.05966 | 0.00718357 | 0.18059945 | 0.03977623 | 0.96827153 | 0.98780003 |
| 9230110C19F | 189.730244 | 0.00714951 | 0.29818861 | 0.02397647 | 0.98087138 | 0.99148577 |
| Mrpl24      | 7555.88351 | 0.00708853 | 0.19776139 | 0.03584387 | 0.97140685 | 0.98908845 |
| Ttc18       | 62.5809647 | 0.00698376 | 0.40147129 | 0.01739541 | 0.98612117 | 0.99391862 |
| AA413626    | 11.1642305 | 0.00697811 | 0.43199381 | 0.01615327 | 0.98711211 | 0.99433738 |
| Capn10      | 1720.84755 | 0.00689822 | 0.21162732 | 0.03259607 | 0.9739967  | 0.98975179 |
| Eml2        | 3783.02426 | 0.00689197 | 0.17993515 | 0.03830253 | 0.96944648 | 0.98814768 |
| Tmem69      | 1351.94262 | 0.00685178 | 0.1679609  | 0.04079391 | 0.96746019 | 0.98780003 |
| Zfp281      | 7514.14277 | 0.00681951 | 0.23743468 | 0.02872161 | 0.97708662 | 0.99086475 |
| Prkag1      | 3498.17065 | 0.00677323 | 0.19185582 | 0.03530373 | 0.97183755 | 0.98920315 |
| Golga1      | 1213.13475 | 0.00658254 | 0.24624976 | 0.02673114 | 0.97867417 | 0.99095946 |
| Gareml      | 358.477299 | 0.00640729 | 0.32214041 | 0.01988975 | 0.98413132 | 0.99287831 |
| Lrp1        | 6738.2653  | 0.00633128 | 0.26746317 | 0.02367159 | 0.98111457 | 0.99148577 |
| Spg20       | 2364.57788 | 0.00630038 | 0.1706081  | 0.03692896 | 0.97054165 | 0.98862285 |
| Mtx3        | 1239.93869 | 0.00626447 | 0.1998569  | 0.03134478 | 0.97499458 | 0.99040699 |
| Mir365-2    | 1.10806344 | 0.0062195  | 0.18318955 | 0.03395117 | 0.97291609 | NA         |
| Anpep       | 260.94172  | 0.00613651 | 0.33896204 | 0.01810384 | 0.98555601 | 0.99354217 |

|             |            |            |            |            |            |            |
|-------------|------------|------------|------------|------------|------------|------------|
| Ogdh        | 9151.25888 | 0.00613642 | 0.22867143 | 0.02683511 | 0.97859125 | 0.99095946 |
| Adamts3     | 4.07506805 | 0.00606268 | 0.35555955 | 0.01705109 | 0.98639586 | NA         |
| Cbfa2t2     | 8632.65039 | 0.0060574  | 0.14741534 | 0.04109072 | 0.96722357 | 0.98780003 |
| Slc22a15    | 14.5555629 | 0.00597893 | 0.43067852 | 0.01388257 | 0.98892366 | 0.99491218 |
| Rab1b       | 5814.46705 | 0.00595542 | 0.17307396 | 0.03440966 | 0.97255048 | 0.98939312 |
| Arfip1      | 3045.12921 | 0.00594742 | 0.17605823 | 0.033781   | 0.97305179 | 0.98940519 |
| Plxnd1      | 282.7101   | 0.0059186  | 0.37049189 | 0.01597497 | 0.98725436 | 0.99435185 |
| Ccdc59      | 2807.49548 | 0.00588999 | 0.17267108 | 0.03411104 | 0.97278861 | 0.98939312 |
| Bmp4        | 80.0774989 | 0.00585514 | 0.33250055 | 0.0176094  | NA         | NA         |
| Egfl8       | 21.6668974 | 0.00582098 | 0.43075943 | 0.01351329 | 0.98921828 | 0.99499143 |
| Thap11      | 3122.51443 | 0.00581409 | 0.1999315  | 0.02908041 | 0.97680046 | 0.99086475 |
| 6430710C18F | 4.61468523 | 0.00579545 | 0.36345918 | 0.01594527 | 0.98727806 | NA         |
| Tcam1       | 32.8294438 | 0.00567637 | 0.39746527 | 0.01428142 | 0.98860546 | 0.99491218 |
| Bcl2l12     | 830.991128 | 0.0056171  | 0.26131386 | 0.02149562 | 0.9828503  | 0.99223221 |
| Osbp12      | 1551.03326 | 0.00559902 | 0.16163724 | 0.03463944 | 0.97236725 | 0.98936861 |
| Diap1       | 8667.14687 | 0.00552907 | 0.23448633 | 0.02357948 | 0.98118804 | 0.99148577 |
| Gm10012     | 1.12739162 | 0.005515   | 0.20796903 | 0.02651837 | 0.97884388 | NA         |
| Ap2a1       | 9781.73833 | 0.00544098 | 0.19255595 | 0.02825663 | 0.97745747 | 0.99086475 |
| Sf3b4       | 2785.00883 | 0.00541178 | 0.26095551 | 0.02073834 | 0.98345439 | 0.99251303 |
| Bzw1        | 38139.4665 | 0.00539729 | 0.18835408 | 0.02865501 | 0.97713974 | 0.99086475 |
| Lrrk2       | 50.7827235 | 0.00539331 | 0.4267317  | 0.01263865 | 0.98991608 | 0.99549745 |
| A630023P12F | 5.72788386 | 0.0053853  | 0.34284055 | 0.01570787 | 0.98746744 | NA         |
| Gckr        | 7.75142438 | 0.00532721 | 0.37278017 | 0.0142905  | 0.98859822 | 0.99491218 |
| Nars2       | 1283.41552 | 0.00525115 | 0.21607587 | 0.02430234 | 0.98061144 | 0.99144975 |
| Rmi1        | 4420.46323 | 0.00523854 | 0.19216288 | 0.02726093 | 0.97825162 | 0.99086764 |
| Mir425      | 5.09764934 | 0.005191   | 0.40513958 | 0.01281286 | 0.9897771  | NA         |
| Eif4ebp2    | 6859.09579 | 0.00517763 | 0.25154096 | 0.02058363 | 0.9835778  | 0.99251303 |
| Nrtn        | 202.152126 | 0.00513311 | 0.33374708 | 0.01538024 | 0.98772882 | 0.9947653  |
| Map1b       | 5637.18366 | 0.00511259 | 0.26407979 | 0.01936003 | 0.9845539  | 0.99301015 |
| Fkbp8       | 11625.0219 | 0.00504754 | 0.18919398 | 0.02667916 | 0.97871564 | 0.99095946 |
| Slc50a1     | 1387.47132 | 0.00499819 | 0.27496315 | 0.01817767 | 0.98549712 | 0.99354217 |
| Stk38l      | 1881.93515 | 0.00498106 | 0.20016007 | 0.02488538 | 0.98014639 | 0.99136628 |
| 2310011J03R | 1325.66879 | 0.00494521 | 0.21376455 | 0.02313393 | 0.98154344 | 0.99155399 |
| Specc1l     | 5718.3661  | 0.00487042 | 0.20565521 | 0.02368247 | 0.98110589 | 0.99148577 |
| Nucb1       | 5658.48356 | 0.00486829 | 0.14304834 | 0.03403245 | 0.97285127 | 0.98939312 |
| Ap1f        | 1330.65099 | 0.00484966 | 0.21923884 | 0.02212044 | 0.98235188 | 0.99191962 |
| Dscaml1     | 90.9053592 | 0.00483594 | 0.32175237 | 0.01503    | 0.98800825 | 0.99479295 |
| H3f3a       | 7617.83282 | 0.00471845 | 0.16188556 | 0.02914685 | 0.97674747 | 0.99086475 |
| Rrnad1      | 952.848411 | 0.00468542 | 0.18404095 | 0.02545857 | 0.9796892  | 0.99131827 |
| Acd         | 1517.98793 | 0.00463292 | 0.24313644 | 0.01905481 | 0.98479738 | 0.99316369 |
| Thrap3      | 11783.8271 | 0.0046019  | 0.21279632 | 0.02162582 | 0.98274644 | 0.99223221 |

|             |            |            |            |            |            |            |
|-------------|------------|------------|------------|------------|------------|------------|
| Ocrl        | 4578.88931 | 0.00459187 | 0.16279393 | 0.02820664 | 0.97749734 | 0.99086475 |
| Mkln1os     | 10.8650007 | 0.00441901 | 0.43227225 | 0.01022276 | 0.99184356 | 0.99671465 |
| Nrd1        | 11208.4395 | 0.00441362 | 0.16039159 | 0.02751777 | 0.97804677 | 0.99086475 |
| Gm614       | 3.12732622 | 0.00439746 | 0.33772402 | 0.01302088 | 0.98961113 | NA         |
| Spock2      | 396.422301 | 0.00439351 | 0.23626574 | 0.01859564 | 0.98516368 | 0.99346867 |
| Fus         | 31979.6737 | 0.00435568 | 0.17247412 | 0.02525411 | 0.97985228 | 0.9913267  |
| Hspb11      | 960.935142 | 0.00428096 | 0.3068841  | 0.01394975 | 0.98887007 | 0.99491218 |
| 1700084E18F | 14.1265671 | 0.00426398 | 0.43220518 | 0.00986564 | 0.99212849 | 0.99683445 |
| Inpp5b      | 2724.32928 | 0.00405418 | 0.16554711 | 0.0244896  | 0.98046208 | 0.9914456  |
| Gbf1        | 3460.6779  | 0.00402036 | 0.24596607 | 0.01634519 | 0.98695901 | 0.99431196 |
| Egln2       | 2940.30499 | 0.00398584 | 0.23225857 | 0.01716122 | 0.986308   | 0.99395986 |
| Ampd3       | 1386.17927 | 0.00395504 | 0.28056007 | 0.01409696 | 0.98875263 | 0.99491218 |
| Trappc2l    | 1325.52373 | 0.00392595 | 0.24494148 | 0.01602811 | 0.98721197 | 0.99435185 |
| Trappc4     | 3223.68821 | 0.00382031 | 0.19324087 | 0.01976967 | 0.98422711 | 0.99291053 |
| Fbxo16      | 67.7708852 | 0.00368925 | 0.37879523 | 0.00973943 | 0.99222918 | 0.9968445  |
| Noc4l       | 5051.62346 | 0.00350684 | 0.21581314 | 0.01624943 | 0.9870354  | 0.99432451 |
| Hsd17b3     | 37.8276603 | 0.00348934 | 0.41980091 | 0.0083119  | 0.99336814 | 0.99718992 |
| Skint4      | 2.82671862 | 0.00347595 | 0.335178   | 0.01037047 | 0.99172571 | NA         |
| 9530051G07l | 7.48358353 | 0.00346101 | 0.41989851 | 0.00824249 | 0.99342352 | 0.99718992 |
| Tmem65      | 1829.6922  | 0.00344564 | 0.24465159 | 0.01408385 | 0.98876308 | 0.99491218 |
| Bcl7b       | 1253.67421 | 0.00342375 | 0.20802676 | 0.01645822 | 0.98686883 | 0.99428554 |
| Cachd1      | 1697.35108 | 0.00318804 | 0.28694692 | 0.01111102 | 0.99113552 | 0.99626065 |
| Ganab       | 28275.5966 | 0.0030093  | 0.17983876 | 0.01673331 | 0.98664937 | 0.99419325 |
| Leprel1     | 6.4506687  | 0.00283647 | 0.40498025 | 0.00700396 | 0.99441169 | 0.99781238 |
| Ptprb       | 5.51486876 | 0.00279423 | 0.41405956 | 0.00674837 | 0.99461562 | NA         |
| Rps13       | 33362.8813 | 0.00271238 | 0.18719223 | 0.01448982 | 0.9884392  | 0.99490084 |
| Fdx1l       | 72.6212792 | 0.00271218 | 0.32846152 | 0.00825722 | 0.99341177 | 0.99718992 |
| Clec2d      | 4.79317586 | 0.00269655 | 0.38090817 | 0.00707925 | 0.99435162 | NA         |
| Dll3        | 89.7098415 | 0.00251428 | 0.3776387  | 0.0066579  | 0.99468781 | 0.99802504 |
| 4930528D03l | 7.55763185 | 0.00244942 | 0.42312501 | 0.00578888 | 0.99538117 | 0.99823872 |
| Ctnna1      | 38138.8489 | 0.00243319 | 0.17588283 | 0.01383416 | 0.98896229 | 0.99491218 |
| Eif1b       | 1291.92465 | 0.00242176 | 0.2212893  | 0.01094387 | 0.99126823 | 0.99632964 |
| Nags        | 44.6478904 | 0.00235268 | 0.41516246 | 0.0056669  | 0.99547849 | 0.99823872 |
| Klhl20      | 2603.88631 | 0.00234485 | 0.19740028 | 0.01187867 | 0.99052241 | 0.99577527 |
| Rab2b       | 2078.182   | 0.0022611  | 0.21518772 | 0.01050759 | 0.99161631 | 0.99661509 |
| C230091D08l | 0.63766462 | 0.00225096 | 0.17839267 | 0.01261802 | 0.98993255 | NA         |
| Cml1        | 49.9006425 | 0.0022457  | 0.35471093 | 0.00633106 | 0.99494858 | 0.99815789 |
| Maea        | 6911.74896 | 0.00223186 | 0.15945179 | 0.0139971  | 0.98883229 | 0.99491218 |
| 1810030O07l | 3081.66238 | 0.00213662 | 0.15707523 | 0.01360249 | 0.98914711 | 0.99499143 |
| E2f7        | 1350.66642 | 0.00210525 | 0.22863732 | 0.00920782 | 0.99265332 | 0.99694858 |
| Usp2        | 548.883466 | 0.00209255 | 0.2325858  | 0.00899688 | 0.99282163 | 0.99705322 |

|             |            |            |            |            |            |            |
|-------------|------------|------------|------------|------------|------------|------------|
| Dyrk2       | 452.840032 | 0.00208446 | 0.24853185 | 0.00838711 | 0.99330814 | 0.99718992 |
| Jmjd1c      | 6874.14943 | 0.00198476 | 0.24829876 | 0.00799344 | 0.99362222 | 0.99718992 |
| 1700016C15F | 2.23959592 | 0.00177266 | 0.27818461 | 0.00637224 | 0.99491572 | NA         |
| Mttd        | 193.970314 | 0.00169792 | 0.33243884 | 0.00510747 | 0.99592485 | 0.99830259 |
| Irx4        | 7.01907724 | 0.00165953 | 0.41716849 | 0.00397807 | 0.99682597 | 0.99888141 |
| C1ql1       | 181.488848 | 0.00161831 | 0.27437952 | 0.00589806 | 0.99529406 | 0.99823872 |
| Zfp92       | 9.1414096  | 0.00151942 | 0.41852588 | 0.00363042 | 0.99710335 | 0.99888883 |
| 15-Sep      | 14616.4681 | 0.00150608 | 0.17335575 | 0.00868782 | 0.99306821 | 0.99711969 |
| 4933413J09R | 1.91916427 | 0.00144544 | 0.29506054 | 0.0048988  | 0.99609134 | NA         |
| Tpcn1       | 1534.07077 | 0.00140138 | 0.17644696 | 0.0079422  | 0.99366311 | 0.99718992 |
| Itgb3bp     | 910.654714 | 0.00140036 | 0.29497853 | 0.00474732 | 0.9962122  | 0.99845939 |
| Gm561       | 531.844472 | 0.00134607 | 0.26371175 | 0.00510433 | 0.99592736 | 0.99830259 |
| Esp4        | 9.85250305 | 0.00128534 | 0.3759277  | 0.0034191  | 0.99727196 | 0.99888883 |
| Kcnq3       | 3.00599103 | 0.00123293 | 0.36210074 | 0.00340493 | 0.99728327 | NA         |
| Bhmt2       | 1282.26344 | 0.0011377  | 0.39316691 | 0.00289368 | 0.99769118 | 0.99904028 |
| Slc25a28    | 1795.38823 | 0.00110116 | 0.17926113 | 0.00614276 | 0.99509882 | 0.99823872 |
| Pou3f3      | 83.5655273 | 0.00105571 | 0.34027265 | 0.00310255 | 0.99752453 | 0.99893773 |
| Igfbp2      | 31999.1764 | 0.00103869 | 0.32016373 | 0.00324425 | 0.99741146 | 0.99888883 |
| Gata5       | 0.63050887 | 0.00100524 | 0.17828653 | 0.00563834 | 0.99550128 | NA         |
| Csf2rb      | 0.63050887 | 0.00100524 | 0.17828653 | 0.00563834 | 0.99550128 | NA         |
| Ythdf1      | 9254.47278 | 0.00096439 | 0.18696254 | 0.00515818 | 0.99588439 | 0.99830259 |
| Otogl       | 0.31883231 | 0.00095228 | 0.16847402 | 0.00565238 | 0.99549008 | NA         |
| Ccdc105     | 0.31883231 | 0.00095228 | 0.16847402 | 0.00565238 | 0.99549008 | NA         |
| Acot5       | 0.31883231 | 0.00095228 | 0.16847402 | 0.00565238 | 0.99549008 | NA         |
| Dcpp2       | 0.31883231 | 0.00095228 | 0.16847402 | 0.00565238 | 0.99549008 | NA         |
| Mir6946     | 0.31883231 | 0.00095228 | 0.16847402 | 0.00565238 | 0.99549008 | NA         |
| Lrrc43      | 0.31883231 | 0.00095228 | 0.16847402 | 0.00565238 | 0.99549008 | NA         |
| Obox3       | 0.31883231 | 0.00095228 | 0.16847402 | 0.00565238 | 0.99549008 | NA         |
| 1700003L19F | 0.31883231 | 0.00095228 | 0.16847402 | 0.00565238 | 0.99549008 | NA         |
| Ces2f       | 0.31883231 | 0.00095228 | 0.16847402 | 0.00565238 | 0.99549008 | NA         |
| Olf1347     | 0.31883231 | 0.00095228 | 0.16847402 | 0.00565238 | 0.99549008 | NA         |
| Cntn6       | 0.31883231 | 0.00095228 | 0.16847402 | 0.00565238 | 0.99549008 | NA         |
| Rnf138rt1   | 0.31883231 | 0.00095228 | 0.16847402 | 0.00565238 | 0.99549008 | NA         |
| Olf1411     | 0.31883231 | 0.00095228 | 0.16847402 | 0.00565238 | 0.99549008 | NA         |
| Mir429      | 0.31883231 | 0.00095228 | 0.16847402 | 0.00565238 | 0.99549008 | NA         |
| 1700012L04F | 0.31883231 | 0.00095228 | 0.16847402 | 0.00565238 | 0.99549008 | NA         |
| Car1        | 0.31883231 | 0.00095228 | 0.16847402 | 0.00565238 | 0.99549008 | NA         |
| Nr5a1       | 0.31883231 | 0.00095228 | 0.16847402 | 0.00565238 | 0.99549008 | NA         |
| Mir763      | 0.31883231 | 0.00095228 | 0.16847402 | 0.00565238 | 0.99549008 | NA         |
| Psg22       | 0.31883231 | 0.00095228 | 0.16847402 | 0.00565238 | 0.99549008 | NA         |
| Spata4      | 0.31883231 | 0.00095228 | 0.16847402 | 0.00565238 | 0.99549008 | NA         |

|              |            |            |            |            |            |            |
|--------------|------------|------------|------------|------------|------------|------------|
| Gm15328      | 0.31883231 | 0.00095228 | 0.16847402 | 0.00565238 | 0.99549008 | NA         |
| D17Ertd648e  | 0.31883231 | 0.00095228 | 0.16847402 | 0.00565238 | 0.99549008 | NA         |
| Mettl7a2Higc | 0.31883231 | 0.00095228 | 0.16847402 | 0.00565238 | 0.99549008 | NA         |
| Fxyd7        | 0.31883231 | 0.00095228 | 0.16847402 | 0.00565238 | 0.99549008 | NA         |
| Rbpj         | 7358.64831 | 0.00080389 | 0.20998644 | 0.00382829 | 0.99694548 | 0.99888883 |
| Slc25a37     | 2079.00436 | 0.00072902 | 0.21417367 | 0.00340388 | 0.9972841  | 0.99888883 |
| Zdbf2        | 4378.70016 | 0.00061572 | 0.3124997  | 0.00197031 | 0.99842792 | 0.9993919  |
| Mettl17      | 1519.918   | 0.0005792  | 0.21930852 | 0.00264102 | 0.99789277 | 0.99911348 |
| Lphn3        | 29.5245953 | 0.0005576  | 0.43213474 | 0.00129034 | 0.99897045 | 0.99944524 |
| Tspan2       | 824.980164 | 0.0005454  | 0.34385085 | 0.00158616 | 0.99873443 | 0.99942685 |
| Asb2         | 63.5506858 | 0.00050221 | 0.35430188 | 0.00141745 | 0.99886904 | 0.99944524 |
| Rab5a        | 5603.32968 | 0.00044498 | 0.19060839 | 0.00233454 | 0.99813731 | 0.99922964 |
| Kiss1r       | 8.0921293  | 0.00043811 | 0.43027152 | 0.00101822 | 0.99918758 | 0.99957324 |
| 4930402H24I  | 1451.02852 | 0.00033274 | 0.2183622  | 0.00152381 | 0.99878418 | 0.99942685 |
| Hnrnpa0      | 19611.209  | 0.00031068 | 0.17956095 | 0.00173021 | 0.99861949 | 0.99942685 |
| Lcmt1        | 4083.91353 | 0.00030914 | 0.18525918 | 0.00166867 | 0.99866859 | 0.99942685 |
| Dnah1        | 26.9788517 | 0.00030376 | 0.43068655 | 0.00070528 | 0.99943727 | 0.99966252 |
| Serpib5      | 23.5139489 | 0.00027702 | 0.41678212 | 0.00066467 | 0.99946967 | 0.99966252 |
| Brd2         | 20193.8768 | 0.0002551  | 0.20259758 | 0.00125913 | 0.99899536 | 0.99944524 |
| Prok1        | 0.9350297  | 0.00010611 | 0.18196712 | 0.00058314 | 0.99953472 | NA         |
| Mkrn3        | 395.36426  | 4.06E-05   | 0.24666756 | 0.00016474 | 0.99986856 | 0.99986856 |
| Kalrn        | 1246.51519 | 3.67E-05   | 0.21803889 | 0.0001685  | 0.99986556 | 0.99986856 |
| Nudt12       | 481.714681 | -0.0001528 | 0.31994943 | -0.0004775 | 0.99961901 | 0.99974759 |
| Fam173a      | 749.567316 | -0.0002443 | 0.28505997 | -0.0008569 | 0.99931627 | 0.99963767 |
| Vmn2r94      | 0.62335313 | -0.0002585 | 0.17817871 | -0.0014508 | 0.99884242 | NA         |
| Zp4-ps       | 0.62335313 | -0.0002585 | 0.17817871 | -0.0014508 | 0.99884242 | NA         |
| Syt8         | 0.62335313 | -0.0002585 | 0.17817871 | -0.0014508 | 0.99884242 | NA         |
| Pramef12     | 5487.48035 | -0.0002935 | 0.18648353 | -0.0015739 | 0.99874422 | 0.99942685 |
| Rbm22        | 4132.60295 | -0.000332  | 0.16765063 | -0.0019806 | 0.99841973 | 0.9993919  |
| Pcdhb14      | 2.22819982 | -0.0005276 | 0.283374   | -0.0018617 | 0.9985146  | NA         |
| Cstf3        | 8086.06594 | -0.000554  | 0.14992721 | -0.0036954 | 0.99705154 | 0.99888883 |
| Efcab7       | 427.094731 | -0.0007207 | 0.26072351 | -0.0027641 | 0.99779454 | 0.99907944 |
| Rps20        | 84025.4583 | -0.0007562 | 0.23085484 | -0.0032758 | 0.99738627 | 0.99888883 |
| 4931406P16F  | 4537.71613 | -0.0007794 | 0.22753521 | -0.0034254 | 0.99726692 | 0.99888883 |
| Eif2b4       | 6139.40104 | -0.0007968 | 0.19921138 | -0.0039997 | 0.99680872 | 0.99888141 |
| Spata5       | 4920.94778 | -0.0008523 | 0.15699184 | -0.0054287 | 0.99566851 | 0.99830052 |
| Kptn         | 769.93793  | -0.0009647 | 0.22041654 | -0.0043765 | 0.99650806 | 0.99869156 |
| Osgep        | 4475.73739 | -0.0010015 | 0.28119878 | -0.0035614 | 0.99715843 | 0.99888883 |
| Bcl2a1d      | 0.31167657 | -0.0010229 | 0.16815827 | -0.0060832 | 0.99514631 | NA         |
| 1700011A15f  | 0.31167657 | -0.0010229 | 0.16815827 | -0.0060832 | 0.99514631 | NA         |
| 4930480G23I  | 0.31167657 | -0.0010229 | 0.16815827 | -0.0060832 | 0.99514631 | NA         |

|             |            |            |            |            |            |            |
|-------------|------------|------------|------------|------------|------------|------------|
| 2310001K24F | 0.31167657 | -0.0010229 | 0.16815827 | -0.0060832 | 0.99514631 | NA         |
| B020004C17f | 0.31167657 | -0.0010229 | 0.16815827 | -0.0060832 | 0.99514631 | NA         |
| Cldn16      | 0.31167657 | -0.0010229 | 0.16815827 | -0.0060832 | 0.99514631 | NA         |
| Gm16675     | 0.31167657 | -0.0010229 | 0.16815827 | -0.0060832 | 0.99514631 | NA         |
| 1700112E06F | 0.31167657 | -0.0010229 | 0.16815827 | -0.0060832 | 0.99514631 | NA         |
| 9830166K06F | 0.31167657 | -0.0010229 | 0.16815827 | -0.0060832 | 0.99514631 | NA         |
| Itgax       | 0.31167657 | -0.0010229 | 0.16815827 | -0.0060832 | 0.99514631 | NA         |
| Gata5os     | 0.31167657 | -0.0010229 | 0.16815827 | -0.0060832 | 0.99514631 | NA         |
| Nkx3-2      | 0.31167657 | -0.0010229 | 0.16815827 | -0.0060832 | 0.99514631 | NA         |
| Kcnip1      | 0.31167657 | -0.0010229 | 0.16815827 | -0.0060832 | 0.99514631 | NA         |
| Olf983      | 0.31167657 | -0.0010229 | 0.16815827 | -0.0060832 | 0.99514631 | NA         |
| Glipr1l2    | 0.31167657 | -0.0010229 | 0.16815827 | -0.0060832 | 0.99514631 | NA         |
| U90926      | 0.31167657 | -0.0010229 | 0.16815827 | -0.0060832 | 0.99514631 | NA         |
| Has1        | 0.31167657 | -0.0010229 | 0.16815827 | -0.0060832 | 0.99514631 | NA         |
| Cln3        | 1366.11376 | -0.0010304 | 0.19345839 | -0.0053265 | 0.99575012 | 0.99830259 |
| Zxdc        | 1967.83753 | -0.0010427 | 0.19096399 | -0.0054601 | 0.99564347 | 0.99830052 |
| Il2rb       | 9.59980791 | -0.0010472 | 0.42899055 | -0.0024411 | 0.99805231 | 0.99920887 |
| Rpap3       | 3130.97712 | -0.0010635 | 0.21270116 | -0.005     | 0.99601061 | 0.99832169 |
| Zfp422      | 1317.10117 | -0.0012029 | 0.2012037  | -0.0059783 | 0.99523    | 0.99823872 |
| Naa60       | 1898.95488 | -0.0012055 | 0.19963771 | -0.0060386 | 0.99518189 | 0.99823872 |
| 9930111H07l | 0.61795904 | -0.0012608 | 0.17809308 | -0.0070796 | 0.99435136 | NA         |
| Gm6086      | 0.61795904 | -0.0012608 | 0.17809308 | -0.0070796 | 0.99435136 | NA         |
| Rgag1       | 0.61795904 | -0.0012608 | 0.17809308 | -0.0070796 | 0.99435136 | NA         |
| Lin7a       | 0.61795904 | -0.0012608 | 0.17809308 | -0.0070796 | 0.99435136 | NA         |
| Cfi         | 0.61795904 | -0.0012608 | 0.17809308 | -0.0070796 | 0.99435136 | NA         |
| Capzb       | 16179.3721 | -0.0013585 | 0.16887354 | -0.0080445 | 0.99358149 | 0.99718992 |
| Sowahc      | 580.910598 | -0.0014265 | 0.21868194 | -0.006523  | 0.99479543 | 0.99806863 |
| Cdc37l1     | 5388.62264 | -0.0015178 | 0.16472439 | -0.0092144 | 0.99264804 | 0.99694858 |
| Ppp2r1a     | 19773.4509 | -0.001555  | 0.19362219 | -0.008031  | 0.99359229 | 0.99718992 |
| 4921506M07  | 2.16934844 | -0.0017179 | 0.3187254  | -0.00539   | 0.99569944 | NA         |
| Slc25a5     | 28072.8479 | -0.0017661 | 0.17961979 | -0.0098323 | 0.99215508 | 0.99683445 |
| Ankrd12     | 1303.73603 | -0.0018397 | 0.23953473 | -0.0076803 | 0.99387207 | 0.99733526 |
| Mir1964     | 0.92963561 | -0.0018419 | 0.22709528 | -0.0081108 | 0.99352861 | NA         |
| 4930473A02f | 0.92963561 | -0.0018419 | 0.22709528 | -0.0081108 | 0.99352861 | NA         |
| Maml2       | 1489.07676 | -0.0020595 | 0.23442326 | -0.0087856 | 0.99299021 | 0.99711969 |
| Pou5f1      | 56696.7439 | -0.0021651 | 0.17933514 | -0.012073  | 0.99036736 | 0.99577527 |
| Ints1       | 6211.92875 | -0.002257  | 0.24102443 | -0.0093642 | 0.99252858 | 0.99694858 |
| Vapb        | 3916.34676 | -0.0023956 | 0.1600789  | -0.0149653 | 0.98805989 | 0.99479295 |
| Arap3       | 22.4056819 | -0.0024554 | 0.43214885 | -0.0056819 | 0.99546656 | 0.99823872 |
| Cript       | 3183.16968 | -0.002457  | 0.20055095 | -0.012251  | 0.99022535 | 0.99573193 |
| D830030K20l | 0.6108033  | -0.0025583 | 0.17798215 | -0.0143737 | 0.98853181 | NA         |

|             |            |            |            |            |            |            |
|-------------|------------|------------|------------|------------|------------|------------|
| 4930404H11I | 0.6108033  | -0.0025583 | 0.17798215 | -0.0143737 | 0.98853181 | NA         |
| Dlx1as      | 0.6108033  | -0.0025583 | 0.17798215 | -0.0143737 | 0.98853181 | NA         |
| 2410127L17F | 848.222329 | -0.0027125 | 0.22996082 | -0.0117957 | 0.99058861 | 0.99577527 |
| Plcg1       | 4620.88238 | -0.0027491 | 0.23169747 | -0.0118649 | 0.99053338 | 0.99577527 |
| Ptger2      | 5.02816918 | -0.0028112 | 0.38833889 | -0.007239  | 0.99422418 | NA         |
| Erp44       | 5565.31694 | -0.0028253 | 0.18904753 | -0.0149449 | 0.98807613 | 0.99479295 |
| Pkd2l1      | 2910.69661 | -0.0028352 | 0.21437759 | -0.0132251 | 0.98944821 | 0.99514352 |
| Klhl4       | 0.99790636 | -0.002985  | 0.20162473 | -0.0148047 | 0.98818802 | NA         |
| Efemp2      | 674.336862 | -0.0031849 | 0.21748693 | -0.0146441 | 0.98831612 | 0.99484135 |
| BC061237    | 1.27594326 | -0.003215  | 0.24695551 | -0.0130186 | 0.98961295 | NA         |
| Gsk3a       | 5443.75813 | -0.0032611 | 0.16144289 | -0.0201995 | 0.98388424 | 0.99275784 |
| Acp2        | 1586.6576  | -0.0033232 | 0.20168956 | -0.0164769 | 0.98685397 | 0.99428554 |
| Mrpl27      | 1591.66054 | -0.0033668 | 0.22935662 | -0.0146794 | 0.98828794 | 0.99484135 |
| Cys1        | 0.95711095 | -0.0034278 | 0.19969529 | -0.0171653 | 0.98630477 | NA         |
| H2-Q5       | 2.77459535 | -0.0034497 | 0.28923949 | -0.0119269 | 0.99048393 | NA         |
| Usp16       | 4262.96214 | -0.0034715 | 0.15475338 | -0.0224327 | 0.98210283 | 0.99185647 |
| Fam203a     | 953.474966 | -0.0035367 | 0.19448282 | -0.0181853 | 0.98549103 | 0.99354217 |
| Chn1        | 2692.72071 | -0.0035794 | 0.20119287 | -0.0177909 | 0.9858057  | 0.99372947 |
| Irs4        | 8.5903525  | -0.0036676 | 0.42287854 | -0.0086728 | 0.99308017 | 0.99711969 |
| A230056P14I | 3.69145059 | -0.0036873 | 0.37748329 | -0.0097682 | 0.99220621 | NA         |
| Ube2g1      | 6682.60873 | -0.0037426 | 0.17606501 | -0.0212569 | 0.98304072 | 0.99229302 |
| Ccna1       | 50.605353  | -0.0037553 | 0.40138843 | -0.0093557 | 0.99253534 | 0.99694858 |
| Ext2        | 4226.99775 | -0.0038033 | 0.20881509 | -0.0182139 | 0.98546818 | 0.99354217 |
| D930015M0E  | 1.22876235 | -0.0038355 | 0.24454784 | -0.0156839 | 0.98748656 | NA         |
| Pappa2      | 1.30958293 | -0.0039253 | 0.24797608 | -0.0158292 | 0.98737068 | NA         |
| Slc25a39    | 14794.5537 | -0.0039754 | 0.18773576 | -0.0211753 | 0.98310579 | 0.99229429 |
| Rgs22       | 103.677968 | -0.003979  | 0.3878959  | -0.0102579 | 0.99181552 | 0.99671465 |
| Doc2g       | 142.033023 | -0.0039855 | 0.31571926 | -0.0126235 | 0.98992814 | 0.99549745 |
| Galnt15     | 0.90993004 | -0.0039993 | 0.19730172 | -0.0202701 | 0.98382788 | NA         |
| Msh4        | 59.3138567 | -0.0040167 | 0.40218219 | -0.0099874 | 0.99203137 | 0.99683445 |
| Gm5544      | 0.64543439 | -0.0040597 | 0.1785051  | -0.0227429 | 0.98185535 | NA         |
| Qrfpr       | 2.46847517 | -0.0041361 | 0.32846364 | -0.0125921 | 0.9899532  | NA         |
| Ank1        | 33.7407816 | -0.0041578 | 0.4309239  | -0.0096485 | 0.99230175 | 0.996853   |
| Gm14207     | 0.65259013 | -0.0041621 | 0.20598297 | -0.0202061 | 0.98387897 | NA         |
| D030045P18I | 0.65259013 | -0.0041621 | 0.20598297 | -0.0202061 | 0.98387897 | NA         |
| 1700015F17F | 0.65259013 | -0.0041621 | 0.20598297 | -0.0202061 | 0.98387897 | NA         |
| Upk1b       | 1.83240991 | -0.0041661 | 0.2375943  | -0.0175347 | 0.98601009 | NA         |
| 2310045N01I | 792.576686 | -0.0041915 | 0.31059709 | -0.0134948 | 0.98923301 | 0.99499143 |
| AI847159    | 2.87088113 | -0.0042952 | 0.36530513 | -0.0117578 | 0.99061884 | NA         |
| Ccdc25      | 4616.63125 | -0.0043374 | 0.17727498 | -0.0244673 | 0.98047983 | 0.9914456  |
| BC048644    | 3.4233225  | -0.0044048 | 0.38731433 | -0.0113726 | 0.99092621 | NA         |



|             |            |            |            |            |            |            |
|-------------|------------|------------|------------|------------|------------|------------|
| Asns        | 79441.0241 | -0.0044832 | 0.16179057 | -0.0277098 | 0.97789359 | 0.99086475 |
| Kcna3       | 1.65765223 | -0.0044981 | 0.25887026 | -0.0173758 | 0.9861368  | NA         |
| Brf1        | 1308.02288 | -0.0045062 | 0.20966636 | -0.0214924 | 0.98285287 | 0.99223221 |
| Foxj1       | 41.0571096 | -0.0045673 | 0.38345361 | -0.0119108 | 0.99049675 | 0.99577527 |
| Homer1      | 2347.91759 | -0.0046201 | 0.27012183 | -0.0171038 | 0.98635384 | 0.99395986 |
| Rabgef1     | 2492.24056 | -0.0046517 | 0.19336879 | -0.0240563 | 0.98080772 | 0.99148577 |
| Polr2j      | 3320.63184 | -0.0046569 | 0.18293068 | -0.0254574 | 0.97969013 | 0.99131827 |
| Elac1       | 491.739241 | -0.0046647 | 0.20390755 | -0.0228763 | 0.98174894 | 0.99166556 |
| Dcpp1       | 0.29912674 | -0.004686  | 0.16757051 | -0.0279643 | 0.97769064 | NA         |
| Gm4489      | 0.29912674 | -0.004686  | 0.16757051 | -0.0279643 | 0.97769064 | NA         |
| Ccdc83      | 0.29912674 | -0.004686  | 0.16757051 | -0.0279643 | 0.97769064 | NA         |
| Sult1b1     | 0.29912674 | -0.004686  | 0.16757051 | -0.0279643 | 0.97769064 | NA         |
| Insm2       | 0.29912674 | -0.004686  | 0.16757051 | -0.0279643 | 0.97769064 | NA         |
| Nlrp1c-ps   | 0.29912674 | -0.004686  | 0.16757051 | -0.0279643 | 0.97769064 | NA         |
| Gm12060     | 0.29912674 | -0.004686  | 0.16757051 | -0.0279643 | 0.97769064 | NA         |
| Gm1647      | 0.29912674 | -0.004686  | 0.16757051 | -0.0279643 | 0.97769064 | NA         |
| Mir1896     | 0.29912674 | -0.004686  | 0.16757051 | -0.0279643 | 0.97769064 | NA         |
| Noto        | 0.29912674 | -0.004686  | 0.16757051 | -0.0279643 | 0.97769064 | NA         |
| Scarna3a    | 0.29912674 | -0.004686  | 0.16757051 | -0.0279643 | 0.97769064 | NA         |
| Bmx         | 0.29912674 | -0.004686  | 0.16757051 | -0.0279643 | 0.97769064 | NA         |
| Slc16a7     | 0.29912674 | -0.004686  | 0.16757051 | -0.0279643 | 0.97769064 | NA         |
| 1700112H15I | 0.29912674 | -0.004686  | 0.16757051 | -0.0279643 | 0.97769064 | NA         |
| Oca2        | 0.29912674 | -0.004686  | 0.16757051 | -0.0279643 | 0.97769064 | NA         |
| Agbl4       | 0.29912674 | -0.004686  | 0.16757051 | -0.0279643 | 0.97769064 | NA         |
| Cldn1       | 0.67907405 | -0.0047035 | 0.17987631 | -0.0261487 | 0.97913875 | NA         |
| E130310I04R | 0.67907405 | -0.0047035 | 0.17987631 | -0.0261487 | 0.97913875 | NA         |
| Mir15a      | 0.67907405 | -0.0047035 | 0.17987631 | -0.0261487 | 0.97913875 | NA         |
| Vmn2r13     | 0.67907405 | -0.0047035 | 0.17987631 | -0.0261487 | 0.97913875 | NA         |
| Poll        | 1349.78506 | -0.0047772 | 0.19057827 | -0.0250668 | 0.9800017  | 0.99134999 |
| Ngf         | 5.11114134 | -0.0048284 | 0.36511809 | -0.0132242 | 0.98944889 | NA         |
| Stk10       | 1267.33945 | -0.0048562 | 0.20761882 | -0.02339   | 0.98133917 | 0.99148577 |
| Dctn3       | 2328.4614  | -0.0048577 | 0.20783786 | -0.0233727 | 0.98135298 | 0.99148577 |
| Kif2b       | 0.34091356 | -0.0048955 | 0.16939899 | -0.028899  | 0.97694513 | NA         |
| Stmn1-rs1   | 0.34091356 | -0.0048955 | 0.16939899 | -0.028899  | 0.97694513 | NA         |
| Npy2r       | 0.34091356 | -0.0048955 | 0.16939899 | -0.028899  | 0.97694513 | NA         |
| 2210019I11R | 0.34091356 | -0.0048955 | 0.16939899 | -0.028899  | 0.97694513 | NA         |
| Calm5       | 0.34091356 | -0.0048955 | 0.16939899 | -0.028899  | 0.97694513 | NA         |
| 1810064F22F | 0.34091356 | -0.0048955 | 0.16939899 | -0.028899  | 0.97694513 | NA         |
| C430002N11I | 0.34091356 | -0.0048955 | 0.16939899 | -0.028899  | 0.97694513 | NA         |
| Ccl17       | 0.34091356 | -0.0048955 | 0.16939899 | -0.028899  | 0.97694513 | NA         |
| Gm5441      | 0.34091356 | -0.0048955 | 0.16939899 | -0.028899  | 0.97694513 | NA         |

|             |            |            |            |            |            |            |
|-------------|------------|------------|------------|------------|------------|------------|
| Cplx3       | 0.34091356 | -0.0048955 | 0.16939899 | -0.028899  | 0.97694513 | NA         |
| Olf1424     | 0.34091356 | -0.0048955 | 0.16939899 | -0.028899  | 0.97694513 | NA         |
| Trem2       | 0.34091356 | -0.0048955 | 0.16939899 | -0.028899  | 0.97694513 | NA         |
| Speer4c     | 0.34091356 | -0.0048955 | 0.16939899 | -0.028899  | 0.97694513 | NA         |
| St8sia3os   | 0.34091356 | -0.0048955 | 0.16939899 | -0.028899  | 0.97694513 | NA         |
| Areg        | 0.34091356 | -0.0048955 | 0.16939899 | -0.028899  | 0.97694513 | NA         |
| Mir6364     | 0.34091356 | -0.0048955 | 0.16939899 | -0.028899  | 0.97694513 | NA         |
| Vmn1r32     | 0.34091356 | -0.0048955 | 0.16939899 | -0.028899  | 0.97694513 | NA         |
| B430010I23R | 0.34091356 | -0.0048955 | 0.16939899 | -0.028899  | 0.97694513 | NA         |
| Mir374      | 0.34091356 | -0.0048955 | 0.16939899 | -0.028899  | 0.97694513 | NA         |
| 6430503K07F | 0.59825347 | -0.0049196 | 0.17777982 | -0.0276726 | 0.97792331 | NA         |
| Gm1527      | 0.59825347 | -0.0049196 | 0.17777982 | -0.0276726 | 0.97792331 | NA         |
| Luzp2       | 2.27836435 | -0.004969  | 0.28050984 | -0.0177141 | 0.98586697 | NA         |
| Asf1b       | 3588.97811 | -0.0050403 | 0.22501214 | -0.0224003 | 0.98212867 | 0.99185647 |
| Zcchc4      | 851.104727 | -0.0050517 | 0.21465928 | -0.0235334 | 0.9812248  | 0.99148577 |
| Myl6        | 8855.15034 | -0.0050723 | 0.21546576 | -0.0235409 | 0.9812188  | 0.99148577 |
| 9530091C08F | 1.20905678 | -0.0051888 | 0.21270205 | -0.0243945 | 0.98053797 | NA         |
| C78339      | 1485.15132 | -0.005208  | 0.20777691 | -0.0250654 | 0.98000279 | 0.99134999 |
| Usp40       | 1428.66286 | -0.0053544 | 0.18113045 | -0.0295612 | 0.97641704 | 0.99086475 |
| Asb7        | 1834.34251 | -0.0054125 | 0.17814081 | -0.0303831 | 0.9757615  | 0.99061251 |
| Ubp2l       | 16989.2908 | -0.0055742 | 0.20120261 | -0.0277046 | 0.97789774 | 0.99086475 |
| AI463170    | 3.49698734 | -0.0056856 | 0.385412   | -0.014752  | 0.98823006 | NA         |
| Spg7        | 3391.00805 | -0.0056926 | 0.18841958 | -0.0302125 | 0.97589761 | 0.99061251 |
| Guk1        | 3675.47335 | -0.0056959 | 0.24447415 | -0.0232985 | 0.98141215 | 0.99148577 |
| Kbtbd2      | 2687.70064 | -0.0057576 | 0.19942434 | -0.0288709 | 0.97696758 | 0.99086475 |
| Mxra7       | 343.601604 | -0.0057774 | 0.29658881 | -0.0194796 | 0.98445847 | 0.99301015 |
| Dus4l       | 1067.19026 | -0.0057805 | 0.23447382 | -0.0246529 | 0.98033179 | 0.99142483 |
| Tgm1        | 1977.60974 | -0.0058104 | 0.3829503  | -0.0151727 | 0.9878944  | 0.99479295 |
| Ighmbp2     | 1064.94148 | -0.0058483 | 0.19137271 | -0.0305595 | 0.97562084 | 0.99061251 |
| Mrpl54      | 2369.61431 | -0.0058566 | 0.21417846 | -0.0273444 | 0.97818504 | 0.99086475 |
| Extl3       | 2980.5614  | -0.0058924 | 0.21449508 | -0.0274711 | 0.97808403 | 0.99086475 |
| Atm         | 6734.99911 | -0.0059097 | 0.24263093 | -0.0243568 | 0.98056801 | 0.99144975 |
| Yeats2      | 5095.24868 | -0.0059172 | 0.21770094 | -0.0271802 | 0.97831601 | 0.99086833 |
| Hyal1       | 1167.70739 | -0.0059246 | 0.25944464 | -0.0228356 | 0.98178143 | 0.99166556 |
| Zfp827      | 912.549999 | -0.0060503 | 0.24453912 | -0.0247415 | 0.98026114 | 0.99141785 |
| Pde6d       | 1191.52605 | -0.0061571 | 0.17903076 | -0.0343912 | 0.97256516 | 0.98939312 |
| Cacna2d3    | 10.2518677 | -0.0061777 | 0.40988003 | -0.0150719 | 0.98797484 | 0.99479295 |
| Arhgef17    | 1846.99343 | -0.0061833 | 0.2482727  | -0.0249051 | 0.98013067 | 0.99136628 |
| Myo1e       | 4845.47879 | -0.006208  | 0.17868101 | -0.0347432 | 0.97228449 | 0.98936861 |
| Fcrlb       | 1.27054917 | -0.0062212 | 0.276271   | -0.0225185 | 0.98203439 | NA         |
| Ccny        | 5235.06567 | -0.0062214 | 0.20874668 | -0.0298034 | 0.97622382 | 0.99081429 |

|             |            |            |            |            |            |            |
|-------------|------------|------------|------------|------------|------------|------------|
| 4933411K20F | 2227.22109 | -0.0062638 | 0.18474092 | -0.0339059 | 0.97295218 | 0.98940519 |
| Irx5        | 20.0123875 | -0.0063985 | 0.43227188 | -0.014802  | 0.98819012 | 0.99484135 |
| Wdr33       | 7895.98126 | -0.0064296 | 0.17426393 | -0.0368957 | 0.97056813 | 0.98862285 |
| Eno1        | 3.12266465 | -0.0064881 | 0.33345291 | -0.0194574 | 0.98447624 | NA         |
| Il21r       | 0.67467138 | -0.0064886 | 0.17956233 | -0.0361355 | 0.97117433 | NA         |
| Ercc1       | 1322.96127 | -0.0065336 | 0.24534649 | -0.0266301 | 0.97875473 | 0.99095946 |
| Mir6391     | 1.82701582 | -0.0065417 | 0.26483229 | -0.0247011 | 0.98029337 | NA         |
| Arl6        | 1297.35701 | -0.0065532 | 0.19400636 | -0.0337782 | 0.97305402 | 0.98940519 |
| Mybphl      | 0.99350369 | -0.0065598 | 0.23243769 | -0.0282217 | 0.97748531 | NA         |
| Use1        | 4894.57721 | -0.006588  | 0.22057811 | -0.029867  | 0.97617315 | 0.99081429 |
| Tsga10      | 161.046505 | -0.0065889 | 0.25444143 | -0.0258957 | 0.97934053 | 0.99113137 |
| Brd1        | 9616.11204 | -0.0066089 | 0.18543086 | -0.0356409 | 0.97156872 | 0.98918736 |
| Secisbp2    | 2337.31752 | -0.0067023 | 0.18031883 | -0.0371693 | 0.97035004 | 0.98859496 |
| Acvr2a      | 1134.02144 | -0.0068126 | 0.22341995 | -0.0304924 | 0.97567438 | 0.99061251 |
| Kin         | 1359.57505 | -0.0068263 | 0.22049824 | -0.0309583 | 0.97530279 | 0.99059066 |
| Gm15850     | 0.33375782 | -0.0068698 | 0.1691019  | -0.040625  | 0.96759487 | NA         |
| Prss28      | 0.33375782 | -0.0068698 | 0.1691019  | -0.040625  | 0.96759487 | NA         |
| Gm10677     | 0.33375782 | -0.0068698 | 0.1691019  | -0.040625  | 0.96759487 | NA         |
| F13b        | 0.33375782 | -0.0068698 | 0.1691019  | -0.040625  | 0.96759487 | NA         |
| Ppfia2      | 0.33375782 | -0.0068698 | 0.1691019  | -0.040625  | 0.96759487 | NA         |
| Ccl5        | 0.33375782 | -0.0068698 | 0.1691019  | -0.040625  | 0.96759487 | NA         |
| Gm12        | 0.33375782 | -0.0068698 | 0.1691019  | -0.040625  | 0.96759487 | NA         |
| Rbm46os     | 0.33375782 | -0.0068698 | 0.1691019  | -0.040625  | 0.96759487 | NA         |
| Fabp7       | 0.33375782 | -0.0068698 | 0.1691019  | -0.040625  | 0.96759487 | NA         |
| 3300005D01I | 0.33375782 | -0.0068698 | 0.1691019  | -0.040625  | 0.96759487 | NA         |
| Gm16325     | 0.33375782 | -0.0068698 | 0.1691019  | -0.040625  | 0.96759487 | NA         |
| Gm3776      | 0.33375782 | -0.0068698 | 0.1691019  | -0.040625  | 0.96759487 | NA         |
| 1700128F08F | 0.33375782 | -0.0068698 | 0.1691019  | -0.040625  | 0.96759487 | NA         |
| Fendrr      | 0.33375782 | -0.0068698 | 0.1691019  | -0.040625  | 0.96759487 | NA         |
| Naga        | 2397.52606 | -0.0069082 | 0.26409102 | -0.0261586 | 0.97913086 | 0.99104816 |
| Scpep1os    | 1.29978617 | -0.0069386 | 0.25044323 | -0.0277054 | 0.9778971  | NA         |
| Mir7090     | 0.6400403  | -0.0070101 | 0.20503802 | -0.0341893 | 0.97272624 | NA         |
| Gm14812     | 0.6400403  | -0.0070101 | 0.20503802 | -0.0341893 | 0.97272624 | NA         |
| Naa35       | 11680.9131 | -0.0070311 | 0.1501776  | -0.0468186 | 0.96265777 | 0.98660086 |
| E2f6        | 1949.87877 | -0.0070443 | 0.20693484 | -0.034041  | 0.97284449 | 0.98939312 |
| Leprel2     | 224.324139 | -0.0071017 | 0.31776436 | -0.022349  | 0.98216957 | 0.99185647 |
| Ttr         | 0.66476257 | -0.007161  | 0.17884064 | -0.040041  | 0.96806046 | NA         |
| Mir127      | 0.66476257 | -0.007161  | 0.17884064 | -0.040041  | 0.96806046 | NA         |
| Adss        | 17040.9978 | -0.0071939 | 0.15635627 | -0.0460097 | 0.96330255 | 0.98665811 |
| Nrde2       | 2805.49376 | -0.0072018 | 0.20801865 | -0.0346212 | 0.97238183 | 0.98936861 |
| Plekha5     | 2694.33594 | -0.0073103 | 0.21057567 | -0.0347158 | 0.97230637 | 0.98936861 |

|             |            |            |            |            |            |            |
|-------------|------------|------------|------------|------------|------------|------------|
| Pdzd11      | 2420.26622 | -0.0073376 | 0.18247827 | -0.0402106 | 0.96792526 | 0.98780003 |
| Mthfd2l     | 40.3152079 | -0.0073689 | 0.42254249 | -0.0174395 | 0.98608603 | 0.99391862 |
| Mir8091     | 12.7991678 | -0.0073713 | 0.43005245 | -0.0171404 | 0.98632459 | 0.99395986 |
| Ube2k       | 9142.89902 | -0.0073957 | 0.16746134 | -0.0441637 | 0.96477391 | 0.98668128 |
| Pdgfc       | 3152.63748 | -0.0074118 | 0.28308349 | -0.0261824 | 0.97911186 | 0.99104816 |
| 4933406J08R | 527.12117  | -0.007454  | 0.26840332 | -0.0277718 | 0.97784418 | 0.99086475 |
| Bfar        | 2103.79863 | -0.0075568 | 0.19008194 | -0.0397553 | 0.96828823 | 0.98780003 |
| Actl6b      | 0.94456112 | -0.0076628 | 0.23017907 | -0.0332908 | 0.97344271 | NA         |
| F3          | 265.559918 | -0.0076804 | 0.26706005 | -0.0287592 | 0.97705664 | 0.99086475 |
| Klhl6       | 0.66751564 | -0.0076999 | 0.17881633 | -0.0430602 | 0.96565358 | NA         |
| Map2k5      | 902.543076 | -0.0077102 | 0.18982099 | -0.0406185 | 0.96760006 | 0.98780003 |
| Rfwd3       | 9825.66011 | -0.007882  | 0.19882206 | -0.0396432 | 0.96837755 | 0.98781497 |
| Nphs1       | 2076.15454 | -0.0078988 | 0.43146601 | -0.018307  | 0.98539394 | 0.99354217 |
| Mir20a      | 9.37220698 | -0.0079069 | 0.40586997 | -0.0194814 | 0.98445704 | 0.99301015 |
| 6030440G07I | 4.66513665 | -0.0079419 | 0.3757973  | -0.0211334 | 0.98313922 | NA         |
| Gm6654      | 0.98634795 | -0.0079606 | 0.23212697 | -0.0342943 | 0.97264245 | NA         |
| Paccin1     | 654.45183  | -0.0079683 | 0.40018869 | -0.0199113 | 0.98411414 | 0.99287831 |
| Rnase10     | 1.00127346 | -0.0080202 | 0.18244147 | -0.0439606 | 0.9649358  | NA         |
| Prl         | 1.00127346 | -0.0080202 | 0.18244147 | -0.0439606 | 0.9649358  | NA         |
| Ankrd63     | 1.55712608 | -0.0080245 | 0.26148426 | -0.0306882 | 0.97551817 | NA         |
| Qtrtd1      | 2825.73833 | -0.0080408 | 0.19451913 | -0.0413367 | 0.96702751 | 0.98766878 |
| Rnpc3       | 2550.18418 | -0.0080852 | 0.22197943 | -0.036423  | 0.97094504 | 0.98881247 |
| Mob4        | 4599.35758 | -0.0080949 | 0.20055323 | -0.0403628 | 0.96780392 | 0.98780003 |
| Trrap       | 9964.08355 | -0.0081119 | 0.28860699 | -0.0281069 | 0.97757685 | 0.99086475 |
| Wdr53       | 998.862693 | -0.0081215 | 0.1869929  | -0.0434324 | 0.96535687 | 0.9869787  |
| Aimp2       | 3164.96089 | -0.0081228 | 0.21443959 | -0.0378793 | 0.96978393 | 0.98814768 |
| Map3k2      | 1403.50556 | -0.0081579 | 0.24470552 | -0.0333377 | 0.97340525 | 0.98955288 |
| Ces4a       | 0.67191831 | -0.0081753 | 0.20744161 | -0.0394099 | 0.96856356 | NA         |
| Rnu11       | 0.67191831 | -0.0081753 | 0.20744161 | -0.0394099 | 0.96856356 | NA         |
| 4921513I03R | 0.67191831 | -0.0081753 | 0.20744161 | -0.0394099 | 0.96856356 | NA         |
| Fam198a     | 0.67191831 | -0.0081753 | 0.20744161 | -0.0394099 | 0.96856356 | NA         |
| Lrrc8a      | 1458.84785 | -0.0082976 | 0.24969402 | -0.0332313 | 0.97349018 | 0.98955288 |
| Gdf5        | 3.89527142 | -0.0083064 | 0.36301686 | -0.0228816 | 0.98174468 | NA         |
| Tbccd1      | 1829.01564 | -0.0083299 | 0.16212076 | -0.051381  | 0.95902192 | 0.98500986 |
| Kdm5b       | 33055.1496 | -0.0083494 | 0.18963871 | -0.044028  | 0.9648821  | 0.98668128 |
| 1700031A10f | 0.70115531 | -0.0083747 | 0.18146099 | -0.0461513 | 0.96318962 | NA         |
| Tmem255a    | 0.70115531 | -0.0083747 | 0.18146099 | -0.0461513 | 0.96318962 | NA         |
| Ppfia3      | 1006.60509 | -0.0083988 | 0.27223227 | -0.0308515 | 0.975388   | 0.99060705 |
| Rmnd1       | 1.01998762 | -0.008479  | 0.23124299 | -0.0366669 | 0.97075059 | NA         |
| AA619741    | 0.95171687 | -0.0084934 | 0.25718382 | -0.0330246 | 0.97365499 | NA         |
| Rps28       | 13759.4983 | -0.0085123 | 0.22271753 | -0.0382201 | 0.96951217 | 0.98814768 |

|             |            |            |            |            |            |            |
|-------------|------------|------------|------------|------------|------------|------------|
| Hemgn       | 0.63288456 | -0.0086096 | 0.20448565 | -0.0421039 | 0.96641589 | NA         |
| Slc28a2     | 0.63288456 | -0.0086096 | 0.20448565 | -0.0421039 | 0.96641589 | NA         |
| 4930563D23I | 0.63288456 | -0.0086096 | 0.20448565 | -0.0421039 | 0.96641589 | NA         |
| Mir3070b    | 0.63288456 | -0.0086096 | 0.20448565 | -0.0421039 | 0.96641589 | NA         |
| Sptlc1      | 2791.71901 | -0.0086279 | 0.14593889 | -0.05912   | 0.95285656 | 0.98295517 |
| Cyp2a5      | 0.62033473 | -0.0087148 | 0.17812367 | -0.0489255 | 0.96097867 | NA         |
| Mir6897     | 0.62033473 | -0.0087148 | 0.17812367 | -0.0489255 | 0.96097867 | NA         |
| Pigo        | 2214.03772 | -0.0087266 | 0.18844056 | -0.0463095 | 0.96306354 | 0.98660086 |
| Lag3        | 143.101957 | -0.0087365 | 0.31703124 | -0.0275573 | 0.97801521 | 0.99086475 |
| Ppp1r35     | 1179.2817  | -0.008765  | 0.24702167 | -0.0354827 | 0.97169481 | 0.98918736 |
| Pnmt        | 0.93916704 | -0.0087887 | 0.22992642 | -0.0382241 | 0.96950899 | NA         |
| Cul2        | 12977.5713 | -0.0088206 | 0.23232109 | -0.0379673 | 0.96971379 | 0.98814768 |
| Pgap3       | 464.278313 | -0.008834  | 0.22228761 | -0.0397413 | 0.96829938 | 0.98780003 |
| 1700125H03I | 1.0084292  | -0.008851  | 0.20211817 | -0.0437912 | 0.96507082 | NA         |
| Doc2a       | 161.536302 | -0.0088792 | 0.34983165 | -0.0253812 | 0.97975088 | 0.99131827 |
| Lsm10       | 1115.90368 | -0.008949  | 0.22418092 | -0.0399185 | 0.9681581  | 0.98780003 |
| Brpf1       | 3976.40167 | -0.0089712 | 0.2285845  | -0.0392466 | 0.96869381 | 0.98792827 |
| Syt1        | 2.27902863 | -0.0090184 | 0.27685856 | -0.032574  | 0.97401434 | NA         |
| Kif7        | 977.326203 | -0.0090333 | 0.2297576  | -0.0393167 | 0.9686379  | 0.98792827 |
| Gm6034      | 0.98095386 | -0.0090714 | 0.23189386 | -0.0391189 | 0.96879562 | NA         |
| Pot1a       | 5176.16765 | -0.0091403 | 0.19549262 | -0.0467551 | 0.96270838 | 0.98660086 |
| Slc7a4      | 109.281823 | -0.009211  | 0.33576854 | -0.0274326 | 0.97811471 | 0.99086475 |
| BC051537    | 2.7560435  | -0.0092545 | 0.3371196  | -0.0274516 | 0.97809953 | NA         |
| Csf3        | 1.98700738 | -0.009317  | 0.27755397 | -0.0335682 | 0.97322152 | NA         |
| Cand2       | 1932.73881 | -0.0093651 | 0.21050168 | -0.0444894 | 0.96451431 | 0.98668128 |
| Frs3os      | 142.619433 | -0.0093709 | 0.31927151 | -0.0293508 | 0.97658478 | 0.99086475 |
| Mtrr        | 4773.61893 | -0.0093936 | 0.18278122 | -0.0513925 | 0.95901272 | 0.98500986 |
| Alpi        | 0.36024175 | -0.0095019 | 0.17012155 | -0.0558536 | 0.95545846 | NA         |
| 4933433G08I | 0.36024175 | -0.0095019 | 0.17012155 | -0.0558536 | 0.95545846 | NA         |
| 4931429L15F | 0.36024175 | -0.0095019 | 0.17012155 | -0.0558536 | 0.95545846 | NA         |
| Agtr1b      | 0.36024175 | -0.0095019 | 0.17012155 | -0.0558536 | 0.95545846 | NA         |
| Nxph2       | 0.36024175 | -0.0095019 | 0.17012155 | -0.0558536 | 0.95545846 | NA         |
| 4921511C20F | 0.36024175 | -0.0095019 | 0.17012155 | -0.0558536 | 0.95545846 | NA         |
| 5930438M14  | 0.36024175 | -0.0095019 | 0.17012155 | -0.0558536 | 0.95545846 | NA         |
| lyd         | 0.36024175 | -0.0095019 | 0.17012155 | -0.0558536 | 0.95545846 | NA         |
| Klf11       | 2299.10748 | -0.0095413 | 0.183665   | -0.0519497 | 0.95856876 | 0.98484816 |
| Bcap29      | 2977.51423 | -0.0096609 | 0.1996537  | -0.0483885 | 0.96140665 | 0.9860077  |
| Pon1        | 1.00303512 | -0.0096965 | 0.2018839  | -0.0480303 | 0.96169211 | NA         |
| Figf        | 106.905643 | -0.0098075 | 0.29662575 | -0.0330634 | 0.97362403 | 0.98955288 |
| Tbc1d12     | 711.921072 | -0.0098079 | 0.20806789 | -0.0471381 | 0.96240312 | 0.98657422 |
| C1rb        | 1.34934277 | -0.0098607 | 0.2193604  | -0.0449521 | 0.96414546 | NA         |

|             |            |            |            |            |            |            |
|-------------|------------|------------|------------|------------|------------|------------|
| Foxs1       | 1.27556587 | -0.0099351 | 0.24699936 | -0.0402231 | 0.96791529 | NA         |
| Syndig1l    | 1.2185882  | -0.0099421 | 0.21305886 | -0.0466638 | 0.96278117 | NA         |
| Tmem50b     | 2187.03866 | -0.0099648 | 0.16258715 | -0.0612892 | 0.95112889 | 0.98234837 |
| 9530080O11l | 0.65496581 | -0.0099913 | 0.17863647 | -0.0559309 | 0.95539686 | NA         |
| Rala        | 4819.58764 | -0.0100464 | 0.18856729 | -0.0532776 | 0.95751074 | 0.98460749 |
| Faf2        | 5340.92315 | -0.0100669 | 0.15654736 | -0.0643058 | 0.94872673 | 0.98128695 |
| Tapbp1      | 113.985489 | -0.0100684 | 0.39726015 | -0.0253445 | 0.9797802  | 0.99131827 |
| Klhl15      | 504.455329 | -0.0101219 | 0.27787167 | -0.0364264 | 0.97094234 | 0.98881247 |
| 2310057M21  | 1267.88349 | -0.0101415 | 0.17202323 | -0.0589541 | 0.95298868 | 0.98295517 |
| Ush1g       | 7.84429246 | -0.0102273 | 0.3893172  | -0.0262697 | 0.97904221 | 0.99104816 |
| Mall        | 247.641104 | -0.0102301 | 0.33776388 | -0.0302878 | 0.9758375  | 0.99061251 |
| Clip2       | 375.356361 | -0.0102667 | 0.2475664  | -0.0414707 | 0.96692069 | 0.98762454 |
| R3hcc1l     | 1626.43463 | -0.0103331 | 0.16276834 | -0.0634834 | 0.94938157 | 0.98150429 |
| Tfip11      | 3117.35054 | -0.0103631 | 0.2351879  | -0.0440631 | 0.96485411 | 0.98668128 |
| Dnajc22     | 524.957075 | -0.0103803 | 0.24610627 | -0.042178  | 0.96635677 | 0.98743769 |
| Mir669h     | 1.34394868 | -0.0104016 | 0.21711785 | -0.0479076 | 0.96178988 | NA         |
| Hmx2        | 4.72310867 | -0.0104086 | 0.40218614 | -0.02588   | 0.97935305 | NA         |
| 9130011E15F | 1555.32817 | -0.0104916 | 0.22118957 | -0.0474326 | 0.96216849 | 0.98652879 |
| Gm3002      | 0.32120799 | -0.010525  | 0.16854917 | -0.0624446 | 0.95020879 | NA         |
| Mir3100     | 0.32120799 | -0.010525  | 0.16854917 | -0.0624446 | 0.95020879 | NA         |
| 6030468B19f | 0.32120799 | -0.010525  | 0.16854917 | -0.0624446 | 0.95020879 | NA         |
| Slc26a3     | 0.32120799 | -0.010525  | 0.16854917 | -0.0624446 | 0.95020879 | NA         |
| Nme8        | 0.32120799 | -0.010525  | 0.16854917 | -0.0624446 | 0.95020879 | NA         |
| Mir1932     | 0.32120799 | -0.010525  | 0.16854917 | -0.0624446 | 0.95020879 | NA         |
| Mir7048     | 0.32120799 | -0.010525  | 0.16854917 | -0.0624446 | 0.95020879 | NA         |
| Mir7044     | 0.32120799 | -0.010525  | 0.16854917 | -0.0624446 | 0.95020879 | NA         |
| Mir19b-1    | 0.32120799 | -0.010525  | 0.16854917 | -0.0624446 | 0.95020879 | NA         |
| Cdk7        | 7392.22675 | -0.0105254 | 0.14261319 | -0.0738038 | 0.94116649 | 0.97866806 |
| Zfp646      | 4559.91129 | -0.0105333 | 0.20644046 | -0.0510235 | 0.95930677 | 0.98500986 |
| Zscan21     | 2627.57217 | -0.0105767 | 0.17511338 | -0.0603994 | 0.95183755 | 0.98252684 |
| Snapc3      | 1597.12994 | -0.0106177 | 0.21242763 | -0.0499829 | 0.96013602 | 0.98552159 |
| Snord23     | 5.00720393 | -0.010679  | 0.39916655 | -0.0267533 | 0.97865648 | NA         |
| Zc3h10      | 1481.58535 | -0.0107529 | 0.19276359 | -0.0557829 | 0.95551474 | 0.98381504 |
| Npbwr1      | 1.2800806  | -0.0108239 | 0.25275144 | -0.0428244 | 0.96584149 | NA         |
| Eif1ax      | 10576.1609 | -0.0108396 | 0.1515679  | -0.0715164 | 0.94298679 | 0.97951958 |
| Tmem140     | 8.57113956 | -0.0108816 | 0.41224933 | -0.0263957 | 0.97894176 | 0.99104816 |
| Crem        | 790.737012 | -0.0109226 | 0.24528585 | -0.0445301 | 0.96448183 | 0.98668128 |
| Glud1       | 21713.5516 | -0.0109679 | 0.19719309 | -0.0556201 | 0.95564442 | 0.98381504 |
| Bglap2      | 1.32952514 | -0.0109896 | 0.21877975 | -0.0502311 | 0.95993822 | NA         |
| Cacfd1      | 510.860602 | -0.0109972 | 0.20180252 | -0.054495  | 0.9565408  | 0.98405248 |
| Rhot2       | 2869.97021 | -0.0110006 | 0.19470634 | -0.0564985 | 0.95494466 | 0.98369871 |

|             |            |            |            |            |            |            |
|-------------|------------|------------|------------|------------|------------|------------|
| Sirpa       | 2078.44198 | -0.0110116 | 0.20203017 | -0.054505  | 0.95653286 | 0.98405248 |
| Ugt1a6b     | 0.72048349 | -0.0110359 | 0.17949492 | -0.061483  | 0.95097454 | NA         |
| Katnal1     | 315.972598 | -0.0111792 | 0.27606375 | -0.0404951 | 0.96769843 | 0.98780003 |
| Klhdc3      | 4722.25854 | -0.0111916 | 0.21274628 | -0.0526055 | 0.9580462  | 0.98476942 |
| Mir7-1      | 51.1810473 | -0.0112387 | 0.37925073 | -0.029634  | 0.97635896 | 0.99086475 |
| Ptp4a2      | 16384.9832 | -0.0114469 | 0.18556369 | -0.0616873 | 0.95081187 | 0.98220244 |
| Mir183      | 0.353086   | -0.0114715 | 0.16983871 | -0.0675434 | 0.94614914 | NA         |
| Ppy         | 0.353086   | -0.0114715 | 0.16983871 | -0.0675434 | 0.94614914 | NA         |
| Tldc2       | 0.353086   | -0.0114715 | 0.16983871 | -0.0675434 | 0.94614914 | NA         |
| Plxna4os1   | 0.353086   | -0.0114715 | 0.16983871 | -0.0675434 | 0.94614914 | NA         |
| Prss46      | 0.353086   | -0.0114715 | 0.16983871 | -0.0675434 | 0.94614914 | NA         |
| Speer4e     | 0.353086   | -0.0114715 | 0.16983871 | -0.0675434 | 0.94614914 | NA         |
| Lrfn2       | 0.353086   | -0.0114715 | 0.16983871 | -0.0675434 | 0.94614914 | NA         |
| Cartpt      | 0.353086   | -0.0114715 | 0.16983871 | -0.0675434 | 0.94614914 | NA         |
| Gm2721      | 0.353086   | -0.0114715 | 0.16983871 | -0.0675434 | 0.94614914 | NA         |
| Pla2g2a     | 0.353086   | -0.0114715 | 0.16983871 | -0.0675434 | 0.94614914 | NA         |
| Etd         | 0.353086   | -0.0114715 | 0.16983871 | -0.0675434 | 0.94614914 | NA         |
| Mrpl38      | 4369.9095  | -0.0114969 | 0.22623836 | -0.0508176 | 0.95947089 | 0.98500986 |
| Elk1        | 2209.43652 | -0.01152   | 0.17136148 | -0.0672264 | 0.94640147 | 0.98064294 |
| LOC1012436  | 6.79457197 | -0.0115742 | 0.42312644 | -0.027354  | 0.97817742 | 0.99086475 |
| Apoc1       | 3246.12849 | -0.0116448 | 0.26454608 | -0.044018  | 0.96489009 | 0.98668128 |
| Zfp936      | 5608.97945 | -0.0117512 | 0.24771085 | -0.0474393 | 0.96216314 | 0.98652879 |
| Btaf1       | 8263.482   | -0.0117625 | 0.22603967 | -0.0520372 | 0.95849909 | 0.98484816 |
| Sar1b       | 3245.07194 | -0.0117783 | 0.21150348 | -0.0556882 | 0.95559019 | 0.98381504 |
| Asb17os     | 0.63966291 | -0.0117999 | 0.1784022  | -0.066142  | 0.94726479 | NA         |
| Dda1        | 3192.08756 | -0.0118244 | 0.19585107 | -0.0603747 | 0.95185721 | 0.98252684 |
| Wdr25       | 659.316347 | -0.0118353 | 0.19505268 | -0.0606773 | 0.95161621 | 0.9825112  |
| Pkn1        | 3585.73453 | -0.0118488 | 0.20296115 | -0.0583798 | 0.95344607 | 0.98295517 |
| Mcmbp       | 9550.73848 | -0.0118888 | 0.17270137 | -0.0688404 | 0.94511664 | 0.98022601 |
| Tmem150b    | 0.96664238 | -0.011907  | 0.23125302 | -0.0514891 | 0.95893581 | NA         |
| AI504432    | 10.8127496 | -0.0119227 | 0.39078478 | -0.0305097 | 0.9756606  | 0.99061251 |
| LOC1023085  | 2.63409137 | -0.0120637 | 0.3242832  | -0.037201  | 0.97032472 | NA         |
| Arhgef7     | 3270.81654 | -0.0120811 | 0.24566381 | -0.0491772 | 0.9607781  | 0.98581817 |
| 1810058I24R | 3552.07247 | -0.0122199 | 0.21500085 | -0.0568365 | 0.95467543 | 0.98360661 |
| Tank        | 859.362699 | -0.0122425 | 0.2177788  | -0.0562155 | 0.95517012 | 0.98369871 |
| Prcc        | 4352.02995 | -0.0122816 | 0.20620657 | -0.0595595 | 0.95250644 | 0.98277785 |
| Vamp1       | 209.291726 | -0.012283  | 0.27862494 | -0.0440844 | 0.96483711 | 0.98668128 |
| Usp25       | 473.665247 | -0.0123325 | 0.34881731 | -0.0353551 | 0.97179657 | 0.98920315 |
| Gm11541     | 0.64241598 | -0.0123461 | 0.17845142 | -0.0691845 | 0.94484278 | NA         |
| Dcdc2c      | 0.95849522 | -0.0123699 | 0.23088571 | -0.0535758 | 0.95727314 | NA         |
| Nxf7        | 207.656074 | -0.0124314 | 0.31789374 | -0.0391055 | 0.96880626 | 0.98792827 |

|             |            |            |            |            |            |            |
|-------------|------------|------------|------------|------------|------------|------------|
| Fbxo45      | 2758.76446 | -0.0125251 | 0.18620816 | -0.0672639 | 0.94637164 | 0.98064294 |
| Efcab4b     | 5.24896952 | -0.0125289 | 0.38111554 | -0.0328744 | 0.97377478 | NA         |
| Adam5       | 2.55167144 | -0.0125539 | 0.34806296 | -0.036068  | 0.97122812 | NA         |
| Fcf1        | 4243.59016 | -0.0125653 | 0.19791634 | -0.0634877 | 0.94937815 | 0.98150429 |
| Gm12216     | 0.99852039 | -0.0126116 | 0.23035129 | -0.0547492 | 0.95633825 | NA         |
| Rps19bp1    | 1978.30111 | -0.0127245 | 0.20084498 | -0.0633549 | 0.94948394 | 0.98150429 |
| Hist1h2aa   | 0.97104505 | -0.0127315 | 0.25804792 | -0.0493376 | 0.96065024 | NA         |
| Dyx1c1      | 219.959107 | -0.0127622 | 0.25826221 | -0.0494156 | 0.96058807 | 0.98577268 |
| Acyp2       | 238.657478 | -0.0128402 | 0.29777795 | -0.04312   | 0.96560587 | 0.98699467 |
| Ndufaf4     | 3608.7236  | -0.0128508 | 0.19161573 | -0.0670657 | 0.94652938 | 0.98071013 |
| Mfsd9       | 130.359297 | -0.0128671 | 0.27710804 | -0.0464335 | 0.9629647  | 0.98660086 |
| Mbd4        | 3080.20639 | -0.0128901 | 0.17800059 | -0.0724161 | 0.94227074 | 0.97906786 |
| Pp2d1       | 0.69399957 | -0.0128928 | 0.20903221 | -0.0616786 | 0.95081876 | NA         |
| Catsper4    | 0.69399957 | -0.0128928 | 0.20903221 | -0.0616786 | 0.95081876 | NA         |
| Pi4kb       | 2976.24473 | -0.0129852 | 0.17555707 | -0.0739654 | 0.94103789 | 0.97866806 |
| Plekhg2     | 908.949215 | -0.0130094 | 0.3256647  | -0.0399472 | 0.96813525 | 0.98780003 |
| 1700073E17F | 1.01283187 | -0.0130137 | 0.25973792 | -0.0501032 | 0.96004017 | NA         |
| Ryk         | 5678.80967 | -0.0130505 | 0.15397145 | -0.084759  | 0.93245296 | 0.97430464 |
| Neto2       | 424.14018  | -0.0131454 | 0.40793683 | -0.0322241 | 0.97429333 | 0.98995332 |
| Nr2c2ap     | 3584.58347 | -0.0131963 | 0.24755975 | -0.0533055 | 0.95748848 | 0.98460749 |
| 8-Mar       | 1651.64736 | -0.0132848 | 0.17533216 | -0.0757691 | 0.93960276 | 0.97818197 |
| Tmem81      | 439.199275 | -0.0133849 | 0.28216725 | -0.0474359 | 0.9621658  | 0.98652879 |
| Stat2       | 4013.69177 | -0.0133893 | 0.20298599 | -0.0659616 | 0.94740839 | 0.98081963 |
| Slc22a1     | 1.56214278 | -0.0133908 | 0.26162716 | -0.0511827 | 0.95917993 | NA         |
| Sbp         | 2.22288007 | -0.0134048 | 0.28602163 | -0.0468664 | 0.96261974 | NA         |
| Mir1898     | 15.9678039 | -0.0134449 | 0.42229174 | -0.031838  | 0.97460121 | 0.99007208 |
| D630029K05I | 1.26576912 | -0.0134802 | 0.25231626 | -0.0534257 | 0.95739273 | NA         |
| 1700018L02F | 1.26576912 | -0.0134802 | 0.25231626 | -0.0534257 | 0.95739273 | NA         |
| Mir3082     | 22.6164713 | -0.0135091 | 0.41499371 | -0.0325526 | 0.97403134 | 0.98975179 |
| Cacna1f     | 0.70617201 | -0.0135329 | 0.17931242 | -0.0754711 | 0.93983986 | NA         |
| Smc2os      | 1.03216006 | -0.0135671 | 0.23415688 | -0.0579404 | 0.95379609 | NA         |
| Rpl31-ps12  | 0.97379812 | -0.0135754 | 0.25815616 | -0.0525861 | 0.95806167 | NA         |
| 4930500J02R | 5485.82459 | -0.0136088 | 0.20554128 | -0.0662096 | 0.94721098 | 0.98076289 |
| Itfg2       | 1858.86548 | -0.0137101 | 0.2136613  | -0.0641672 | 0.94883706 | 0.9813358  |
| Fam47e      | 0.95133948 | -0.0138043 | 0.23055348 | -0.0598745 | 0.95225556 | NA         |
| Dnajb5      | 844.511372 | -0.0138389 | 0.25068656 | -0.0552041 | 0.95597584 | 0.98400717 |
| 1-Sep       | 12057.1802 | -0.0138658 | 0.27293923 | -0.0508016 | 0.9594836  | 0.98500986 |
| Ell         | 1761.46106 | -0.0139082 | 0.22802416 | -0.0609943 | 0.95136371 | 0.98235672 |
| Gfm1        | 7558.07335 | -0.0139278 | 0.17945985 | -0.0776095 | 0.9381387  | 0.97735613 |
| Nkd2        | 100.13647  | -0.0139733 | 0.34734078 | -0.0402295 | 0.96791016 | 0.98780003 |
| Lpl         | 3528.67208 | -0.0140221 | 0.24230676 | -0.0578692 | 0.95385279 | 0.98312333 |



|             |            |            |            |            |            |            |
|-------------|------------|------------|------------|------------|------------|------------|
| Prkar2b     | 230.16351  | -0.0140324 | 0.39507329 | -0.0355184 | 0.97166638 | 0.98918736 |
| Mtch1       | 7176.41242 | -0.0140491 | 0.19172122 | -0.073279  | 0.94158411 | 0.97884715 |
| Zkscan5     | 2182.01267 | -0.014093  | 0.17138389 | -0.0822304 | 0.93446349 | 0.97558305 |
| Kremen1     | 1221.14611 | -0.0141645 | 0.23474097 | -0.060341  | 0.95188408 | 0.98252684 |
| Cdnf        | 51.4240313 | -0.0141749 | 0.36751411 | -0.0385696 | 0.96923355 | 0.98810482 |
| Arid3c      | 10.2027036 | -0.0143277 | 0.43208768 | -0.0331593 | 0.97354754 | 0.98955288 |
| Prpf38a     | 9229.77441 | -0.0143292 | 0.1676273  | -0.0854825 | 0.93187781 | 0.97430464 |
| Krt1        | 0.99587937 | -0.0143444 | 0.23023847 | -0.0623022 | 0.95032221 | NA         |
| Adprh       | 8519.41653 | -0.0144288 | 0.21103452 | -0.0683718 | 0.94548968 | 0.98027294 |
| Elp4        | 1921.23036 | -0.0146735 | 0.18652755 | -0.0786668 | 0.93729766 | 0.97680712 |
| Cdadcl1     | 1004.89979 | -0.0147621 | 0.16863007 | -0.0875412 | 0.93024131 | 0.97421931 |
| Mir298      | 0.70077792 | -0.0148822 | 0.18147997 | -0.0820049 | 0.93464282 | NA         |
| Camta2      | 664.897157 | -0.014948  | 0.26574155 | -0.0562501 | 0.95514259 | 0.98369871 |
| Mag         | 18.4698623 | -0.0149756 | 0.42779467 | -0.0350064 | 0.97207462 | 0.98936861 |
| Sorl1       | 5392.76471 | -0.0149768 | 0.24973714 | -0.0599704 | 0.95217921 | 0.98262097 |
| Mob3a       | 1909.07886 | -0.0150717 | 0.183169   | -0.0822832 | 0.93442151 | 0.97558305 |
| Impdh2      | 20671.0938 | -0.0150936 | 0.17747895 | -0.0850445 | 0.932226   | 0.97430464 |
| Csf1r       | 4.18686503 | -0.0151139 | 0.35654139 | -0.0423902 | 0.96618763 | NA         |
| Gm19510     | 0.34053617 | -0.0151141 | 0.16931278 | -0.0892671 | 0.92886961 | NA         |
| Mir6945     | 0.34053617 | -0.0151141 | 0.16931278 | -0.0892671 | 0.92886961 | NA         |
| Armc4       | 0.34053617 | -0.0151141 | 0.16931278 | -0.0892671 | 0.92886961 | NA         |
| Fezf2       | 0.34053617 | -0.0151141 | 0.16931278 | -0.0892671 | 0.92886961 | NA         |
| Gm136       | 0.34053617 | -0.0151141 | 0.16931278 | -0.0892671 | 0.92886961 | NA         |
| Gm5468      | 0.34053617 | -0.0151141 | 0.16931278 | -0.0892671 | 0.92886961 | NA         |
| D6Ertd474e  | 0.34053617 | -0.0151141 | 0.16931278 | -0.0892671 | 0.92886961 | NA         |
| Chodl       | 0.34053617 | -0.0151141 | 0.16931278 | -0.0892671 | 0.92886961 | NA         |
| Cnga2       | 0.34053617 | -0.0151141 | 0.16931278 | -0.0892671 | 0.92886961 | NA         |
| Mir7679     | 0.34053617 | -0.0151141 | 0.16931278 | -0.0892671 | 0.92886961 | NA         |
| Fam98a      | 4441.74707 | -0.0151407 | 0.17586703 | -0.0860918 | 0.93139347 | 0.97430464 |
| Ndufs6      | 6036.10588 | -0.0151578 | 0.21514722 | -0.0704531 | 0.94383303 | 0.97986765 |
| Tmem126b    | 988.49454  | -0.0151968 | 0.22254973 | -0.068285  | 0.94555877 | 0.98027294 |
| Bdh2        | 101.51647  | -0.0152125 | 0.37857109 | -0.0401839 | 0.9679465  | 0.98780003 |
| Dus2        | 1610.77943 | -0.015239  | 0.17718883 | -0.0860042 | 0.93146309 | 0.97430464 |
| Psmc2       | 10100.9585 | -0.0152428 | 0.18197337 | -0.083764  | 0.93324407 | 0.97467283 |
| Crnkl1      | 6022.90498 | -0.0152462 | 0.17335853 | -0.0879461 | 0.92991948 | 0.97394786 |
| Elovl3      | 1.33679294 | -0.0152539 | 0.24778862 | -0.0615602 | 0.95091311 | NA         |
| C330006A16f | 1833.39998 | -0.0152895 | 0.19353658 | -0.0790003 | 0.93703236 | 0.97680712 |
| Hist1h2an   | 0.66174417 | -0.0153015 | 0.17871726 | -0.0856187 | 0.9317695  | NA         |
| Ago3        | 520.66514  | -0.0153449 | 0.30056703 | -0.0510531 | 0.95928322 | 0.98500986 |
| AF366264    | 1.31471168 | -0.0153716 | 0.27748442 | -0.0553964 | 0.95582267 | NA         |
| 9230112D13f | 1.30993162 | -0.0153756 | 0.21818882 | -0.0704691 | 0.94382032 | NA         |

|             |            |            |            |            |            |            |
|-------------|------------|------------|------------|------------|------------|------------|
| Ppapdc1a    | 2.18010183 | -0.0154173 | 0.30835589 | -0.0499984 | 0.96012367 | NA         |
| Itgb2       | 16.3647839 | -0.0155201 | 0.43178311 | -0.0359443 | 0.97132678 | 0.98907169 |
| B630005N14  | 2733.01508 | -0.0155585 | 0.29337011 | -0.0530337 | 0.95770505 | 0.98460749 |
| Ddx24       | 7655.14165 | -0.0156544 | 0.20403597 | -0.0767239 | 0.9388432  | 0.97776256 |
| Rufy3       | 3403.24774 | -0.0156797 | 0.21959855 | -0.0714016 | 0.94307812 | 0.97954902 |
| Mon1b       | 826.416244 | -0.0157367 | 0.2358116  | -0.0667343 | 0.94679321 | 0.98072348 |
| Aldh1a1     | 0.68144974 | -0.0157492 | 0.20816767 | -0.0756565 | 0.93969241 | NA         |
| Cd22        | 16.7120233 | -0.0157745 | 0.43166588 | -0.0365433 | 0.97084912 | 0.98881247 |
| Slc38a7     | 3850.61159 | -0.0157839 | 0.1558895  | -0.1012507 | 0.91935144 | 0.96953982 |
| Hunk        | 860.821492 | -0.0157905 | 0.3497543  | -0.0451475 | 0.96398977 | 0.98668128 |
| Cdkn2aip    | 2153.26609 | -0.0158061 | 0.22597801 | -0.0699454 | 0.94423713 | 0.98001007 |
| 4933421I07R | 1.00028204 | -0.0160546 | 0.25926438 | -0.0619235 | 0.95062372 | NA         |
| Nsun3       | 232.511163 | -0.0160992 | 0.30770774 | -0.0523199 | 0.95827378 | 0.98484816 |
| Ddah1       | 5726.8436  | -0.0161764 | 0.31800226 | -0.050869  | 0.95942994 | 0.98500986 |
| Sulf2       | 11973.0899 | -0.016301  | 0.17733629 | -0.0919213 | 0.92676057 | 0.97238317 |
| Vps37a      | 3312.83987 | -0.0163032 | 0.17945185 | -0.0908502 | 0.92761165 | 0.97272899 |
| Tmem178b    | 2.82569852 | -0.016342  | 0.3265885  | -0.0500384 | 0.96009181 | NA         |
| Tlk2        | 9424.29471 | -0.0163595 | 0.16264102 | -0.1005865 | 0.91987873 | 0.96963561 |
| Gm14378     | 58.4023452 | -0.0163986 | 0.395127   | -0.0415022 | 0.96689554 | 0.98762454 |
| Gm1322      | 7.33595333 | -0.0164181 | 0.25164176 | -0.0652439 | 0.94797981 | 0.98083012 |
| Gpc1        | 1402.78241 | -0.0164459 | 0.34809438 | -0.0472454 | 0.96231763 | 0.98657422 |
| Colgalt2    | 96.9363271 | -0.0164659 | 0.43161797 | -0.0381492 | 0.96956874 | 0.98814768 |
| Gm15097     | 61.9384761 | -0.0164789 | 0.42477344 | -0.0387947 | 0.9690541  | 0.98805142 |
| Mthfr       | 3374.16568 | -0.0165021 | 0.23610316 | -0.0698937 | 0.94427824 | 0.98001007 |
| Stard3nl    | 4798.46716 | -0.0165096 | 0.15054564 | -0.109665  | 0.91267507 | 0.96715571 |
| Ddrgk1      | 1743.23413 | -0.016675  | 0.19650868 | -0.0848565 | 0.9323755  | 0.97430464 |
| Gba2        | 1170.27513 | -0.0167127 | 0.25636179 | -0.065192  | 0.94802111 | 0.98083012 |
| Gpr152      | 1.0223633  | -0.016724  | 0.23376026 | -0.0715433 | 0.94296534 | NA         |
| Fam132b     | 271.614807 | -0.0167399 | 0.36390667 | -0.0460006 | 0.96330976 | 0.98665811 |
| Trub1       | 2525.13696 | -0.0167491 | 0.19387782 | -0.0863898 | 0.93115657 | 0.97430464 |
| Srpk2       | 5539.77142 | -0.016763  | 0.18133419 | -0.0924426 | 0.92634636 | 0.97229279 |
| Wdr11       | 4314.71499 | -0.0167665 | 0.19693677 | -0.0851365 | 0.93215286 | 0.97430464 |
| Spin4       | 304.202438 | -0.0168701 | 0.30396265 | -0.0555007 | 0.9557396  | 0.98382912 |
| Fam104a     | 2030.46875 | -0.01701   | 0.20827313 | -0.0816715 | 0.93490796 | 0.97569448 |
| Sat2        | 129.649055 | -0.0170643 | 0.36671142 | -0.0465334 | 0.96288511 | 0.98660086 |
| Prmt10      | 2699.03954 | -0.0170856 | 0.17394452 | -0.0982244 | 0.92175413 | 0.97036275 |
| Fam219a     | 71.4978684 | -0.0170867 | 0.34015895 | -0.0502314 | 0.95993798 | 0.98541128 |
| Gh          | 3.92745079 | -0.0171279 | 0.34535596 | -0.049595  | 0.96044514 | NA         |
| 1700020N01  | 44.1262686 | -0.0171391 | 0.4030414  | -0.0425243 | 0.96608073 | 0.98741514 |
| Tmem95      | 5.03716092 | -0.0171768 | 0.40748024 | -0.0421538 | 0.96637611 | NA         |
| Tab2        | 6369.3517  | -0.0171966 | 0.19066749 | -0.0901913 | 0.92813517 | 0.97288637 |

|             |            |            |            |            |            |            |
|-------------|------------|------------|------------|------------|------------|------------|
| Eef1b2      | 69967.1856 | -0.017203  | 0.17359642 | -0.0990978 | 0.92106063 | 0.97000537 |
| Gtf2a1      | 2874.37507 | -0.0173007 | 0.19081918 | -0.0906652 | 0.92775866 | 0.97272899 |
| Mir7092     | 0.674294   | -0.0173537 | 0.20766193 | -0.0835672 | 0.93340055 | NA         |
| 3110035E14F | 0.674294   | -0.0173537 | 0.20766193 | -0.0835672 | 0.93340055 | NA         |
| 2010107E04F | 7320.68892 | -0.0173915 | 0.21756857 | -0.0799356 | 0.93628844 | 0.97660618 |
| Pcgf3       | 3455.22238 | -0.0174043 | 0.2398199  | -0.0725726 | 0.94214626 | 0.97906786 |
| Zfp623      | 1049.38706 | -0.0174572 | 0.19253407 | -0.0906705 | 0.92775439 | 0.97272899 |
| Sptbn4      | 1464.95219 | -0.0175066 | 0.18984199 | -0.0922165 | 0.92652606 | 0.97229279 |
| Tmprss11e   | 1.28245628 | -0.017537  | 0.24724939 | -0.0709283 | 0.94345485 | NA         |
| Pex11b      | 2198.2111  | -0.0175575 | 0.19902172 | -0.088219  | 0.92970262 | 0.97385191 |
| Efr3a       | 11543.2428 | -0.0175764 | 0.17640634 | -0.099636  | 0.92063334 | 0.96990703 |
| Fgf16       | 1.94924584 | -0.0175772 | 0.30836368 | -0.0570016 | 0.9545439  | NA         |
| Apoa5       | 1.94924584 | -0.0175772 | 0.30836368 | -0.0570016 | 0.9545439  | NA         |
| Ccdc132     | 6156.77251 | -0.0176029 | 0.18320786 | -0.0960815 | 0.92345587 | 0.971175   |
| Cacna1c     | 53.9153428 | -0.0176187 | 0.38018299 | -0.0463428 | 0.96303705 | 0.98660086 |
| Syt15       | 1.06101967 | -0.0177384 | 0.20446934 | -0.0867532 | 0.93086771 | NA         |
| Metrn1      | 11.6329825 | -0.0177842 | 0.42441079 | -0.0419032 | 0.96657589 | 0.98759625 |
| Sde2        | 6876.67791 | -0.0177855 | 0.21638333 | -0.0821946 | 0.93449201 | 0.97558305 |
| Dohh        | 4455.16463 | -0.0178351 | 0.20751867 | -0.0859447 | 0.93151036 | 0.97430464 |
| Ndst1       | 2788.74198 | -0.0178368 | 0.27120771 | -0.0657681 | 0.94756249 | 0.98081963 |
| R3hdm4      | 2189.72646 | -0.017851  | 0.23197923 | -0.0769507 | 0.93866277 | 0.97770561 |
| Trim41      | 4156.5109  | -0.0178806 | 0.20008328 | -0.0893656 | 0.92879138 | 0.97322517 |
| Ube2v1      | 805.32453  | -0.0179187 | 0.25366975 | -0.0706379 | 0.94368591 | 0.97986765 |
| Kcnk4       | 51.2679628 | -0.0179477 | 0.42912502 | -0.0418241 | 0.96663896 | 0.98759625 |
| Snord42b    | 65.0197469 | -0.0179695 | 0.35195744 | -0.0510558 | 0.9592811  | 0.98500986 |
| Ndufaf5     | 1695.40806 | -0.0181017 | 0.18410612 | -0.0983219 | 0.92167666 | 0.97034688 |
| Tmem43      | 4389.63515 | -0.0181523 | 0.22900424 | -0.079266  | 0.93682101 | 0.97680712 |
| Pdcd2l      | 2561.47248 | -0.0181923 | 0.1699398  | -0.1070517 | 0.91474794 | 0.96832729 |
| Alkbh1      | 2521.05069 | -0.0182465 | 0.19285502 | -0.0946123 | 0.92462279 | 0.9714195  |
| Nol10       | 6442.31594 | -0.0182923 | 0.20037212 | -0.0912919 | 0.92726067 | 0.97266045 |
| Plekhg6     | 207.835062 | -0.0183692 | 0.27946631 | -0.0657296 | 0.9475931  | 0.98081963 |
| Tm7sf2      | 1532.85327 | -0.0183734 | 0.21910279 | -0.0838573 | 0.93316985 | 0.97467283 |
| Fat3        | 1.6793561  | -0.0183834 | 0.29333772 | -0.0626697 | 0.95002951 | NA         |
| Ifi27l2a    | 1.98211527 | -0.0183879 | 0.30246895 | -0.0607928 | 0.95152424 | NA         |
| Gm10433     | 17.9975895 | -0.0183901 | 0.42098946 | -0.0436831 | 0.965157   | 0.98686018 |
| Zfp414      | 1362.81205 | -0.0184728 | 0.18581082 | -0.099417  | 0.9208072  | 0.96990703 |
| Cyp2d26     | 1.31195861 | -0.0184941 | 0.30360097 | -0.0609158 | 0.95142626 | NA         |
| Theg        | 1.31195861 | -0.0184941 | 0.30360097 | -0.0609158 | 0.95142626 | NA         |
| Prmt8       | 820.058337 | -0.0185663 | 0.41598933 | -0.0446317 | 0.96440086 | 0.98668128 |
| Mesp2       | 48.7742473 | -0.0186052 | 0.40054533 | -0.0464496 | 0.96295193 | 0.98660086 |
| Fgd4        | 895.382329 | -0.0186244 | 0.25900209 | -0.0719084 | 0.94267482 | 0.97939177 |

|             |            |            |            |            |            |            |
|-------------|------------|------------|------------|------------|------------|------------|
| Taok2       | 6026.54079 | -0.018705  | 0.19564635 | -0.095606  | 0.9238335  | 0.9712368  |
| Plod3       | 3466.31615 | -0.0188336 | 0.20408176 | -0.0922845 | 0.92647198 | 0.97229279 |
| Ccdc155     | 346.311683 | -0.0188363 | 0.33879879 | -0.0555972 | 0.95566266 | 0.98381504 |
| Tdg         | 5.74475198 | -0.0188727 | 0.40954327 | -0.0460824 | 0.96324459 | NA         |
| Itga9       | 98.6095888 | -0.0189025 | 0.38270533 | -0.0493919 | 0.96060699 | 0.98577268 |
| Fam168a     | 2752.80371 | -0.0190138 | 0.27500258 | -0.0691406 | 0.94487773 | 0.98017434 |
| Krt15       | 3.46435455 | -0.0190954 | 0.38788325 | -0.0492298 | 0.96073618 | NA         |
| Gpr132      | 9.59186261 | -0.0191448 | 0.42470822 | -0.0450776 | 0.96404542 | 0.98668128 |
| LOC10050460 | 21.5898484 | -0.0191492 | 0.42603163 | -0.0449479 | 0.96414882 | 0.98668128 |
| Gm996       | 26.950078  | -0.0193106 | 0.41931097 | -0.0460531 | 0.96326796 | 0.98665811 |
| Pigf        | 2120.53094 | -0.0193658 | 0.19201062 | -0.1008577 | 0.91966341 | 0.96959357 |
| Galr3       | 0.98597056 | -0.0194662 | 0.25870259 | -0.0752456 | 0.94001928 | NA         |
| Snora43     | 71.3037303 | -0.0196741 | 0.35980408 | -0.0546801 | 0.95639332 | 0.98405248 |
| Rab14       | 7115.80723 | -0.0196859 | 0.17556453 | -0.1121289 | 0.9107212  | 0.96611948 |
| Tdrd5       | 130.621501 | -0.0197456 | 0.36780806 | -0.0536844 | 0.95718661 | 0.9845304  |
| Mir6993     | 1.92276191 | -0.0197488 | 0.33401961 | -0.0591246 | 0.95285286 | NA         |
| Stk19       | 558.640937 | -0.0197996 | 0.24652963 | -0.0803133 | 0.93598809 | 0.97635838 |
| Lcn2        | 1.71398718 | -0.0199257 | 0.29381641 | -0.0678168 | 0.94593145 | NA         |
| Crat        | 893.283348 | -0.0199985 | 0.17705137 | -0.1129528 | 0.91006797 | 0.96572178 |
| Snora70     | 211.036696 | -0.0202087 | 0.30452399 | -0.0663617 | 0.94708987 | 0.98076289 |
| Alkbh5      | 9220.24166 | -0.0203236 | 0.18209395 | -0.1116106 | 0.91113214 | 0.96617906 |
| Kif13a      | 4455.40688 | -0.0203695 | 0.21386908 | -0.0952427 | 0.92412205 | 0.9713263  |
| Med19       | 5612.31967 | -0.0205848 | 0.15917772 | -0.1293195 | 0.89710481 | 0.96146636 |
| Spdef       | 13.9121821 | -0.0206494 | 0.42242322 | -0.0488832 | 0.96101234 | 0.9858688  |
| Gm7120      | 32.9330244 | -0.0206728 | 0.41651061 | -0.0496332 | 0.96041466 | 0.98570541 |
| Skp2        | 3794.4777  | -0.0206792 | 0.21559719 | -0.0959159 | 0.92358736 | 0.9711175  |
| Gpr97       | 18.5350738 | -0.0206832 | 0.42317267 | -0.0488766 | 0.96101763 | 0.9858688  |
| Kcnip4      | 3.21918708 | -0.0207379 | 0.37180339 | -0.0557765 | 0.95551988 | NA         |
| Tmem80      | 74.8549029 | -0.0208272 | 0.31639829 | -0.0658259 | 0.94751647 | 0.98081963 |
| Xpnpep1     | 13672.6783 | -0.0208881 | 0.18879544 | -0.110639  | 0.91190261 | 0.96672055 |
| Cyp4a30b    | 1.41031093 | -0.0209695 | 0.22006383 | -0.0952882 | 0.92408594 | NA         |
| Slc19a2     | 5715.37744 | -0.0209867 | 0.20690622 | -0.1014311 | 0.91920826 | 0.96953982 |
| Ascl1       | 2.9115358  | -0.0210199 | 0.32564246 | -0.0645489 | 0.94853314 | NA         |
| Slc2a4      | 112.484704 | -0.0210583 | 0.38576782 | -0.0545879 | 0.95646674 | 0.98405248 |
| Zc3h7a      | 4602.02531 | -0.0211524 | 0.18256685 | -0.1158609 | 0.90776282 | 0.96495598 |
| Lpcat2      | 51.8235653 | -0.0214496 | 0.36690651 | -0.0584605 | 0.95338179 | 0.98295517 |
| Ptgds       | 20.4909662 | -0.0216399 | 0.41716593 | -0.0518735 | 0.95862946 | 0.98484816 |
| Mrpl1       | 3787.39804 | -0.0216684 | 0.17673223 | -0.1226059 | 0.90241916 | 0.96298088 |
| Arhgap4     | 476.872513 | -0.0216856 | 0.2076919  | -0.1044122 | 0.91684226 | 0.96879329 |
| Pdlim1      | 3969.62538 | -0.0216893 | 0.19615032 | -0.1105747 | 0.9119536  | 0.96672055 |
| Mccc2       | 1673.02393 | -0.0218292 | 0.16532126 | -0.1320413 | 0.89495164 | 0.96038316 |

|             |            |            |            |            |            |            |
|-------------|------------|------------|------------|------------|------------|------------|
| Arl6ip4     | 2872.34438 | -0.0218549 | 0.21243877 | -0.1028761 | 0.91806129 | 0.96891454 |
| Gemin4      | 6715.28607 | -0.0218828 | 0.2124069  | -0.103023  | 0.91794468 | 0.96891454 |
| Ap3s2       | 4428.09954 | -0.021977  | 0.17375522 | -0.1264827 | 0.89934982 | 0.96194986 |
| Ndc1        | 5084.10073 | -0.0219835 | 0.19034623 | -0.115492  | 0.90805516 | 0.96495598 |
| Mrpl45      | 9662.89963 | -0.0220545 | 0.19159034 | -0.1151131 | 0.90835551 | 0.96507731 |
| Prune       | 6537.46367 | -0.0220736 | 0.18858168 | -0.1170506 | 0.90681992 | 0.96458038 |
| Ccdc34      | 2582.02131 | -0.0222439 | 0.20755221 | -0.1071727 | 0.91465198 | 0.96832684 |
| Rnf6        | 2120.82556 | -0.0222637 | 0.18596385 | -0.1197204 | 0.90470465 | 0.96383243 |
| Arl6ip1     | 33025.8492 | -0.022351  | 0.18439591 | -0.1212122 | 0.90352299 | 0.96343157 |
| Gm8579      | 1.54042277 | -0.0224084 | 0.19196119 | -0.1167343 | 0.90707065 | NA         |
| Hist1h4c    | 1.62876393 | -0.0224265 | 0.29253098 | -0.0766636 | 0.9388912  | NA         |
| Ppp2r2a     | 7732.27036 | -0.0224731 | 0.16651902 | -0.1349579 | 0.89264518 | 0.95958049 |
| E2f1        | 3779.61185 | -0.0224874 | 0.17175633 | -0.1309262 | 0.89583368 | 0.96083244 |
| Pcbd1       | 457.844982 | -0.0225241 | 0.31493274 | -0.0715205 | 0.94298354 | 0.97951958 |
| B3gnt5      | 3141.87316 | -0.0226181 | 0.17328582 | -0.1305248 | 0.89615122 | 0.96084712 |
| Scamp5      | 4553.25248 | -0.0226249 | 0.15576961 | -0.145246  | 0.88451667 | 0.95575952 |
| Cltc        | 37318.9247 | -0.0226706 | 0.21246972 | -0.1067001 | 0.91502687 | 0.96836839 |
| Cidec       | 26.84543   | -0.022701  | 0.41703718 | -0.054434  | 0.95658937 | 0.98405248 |
| Trpm4       | 1650.13579 | -0.0227916 | 0.22557842 | -0.1010364 | 0.9195216  | 0.96959357 |
| Adamts13    | 1.40732732 | -0.0228007 | 0.25353018 | -0.089933  | 0.92834043 | NA         |
| Nr3c1       | 1014.92218 | -0.0228595 | 0.29426115 | -0.0776845 | 0.93807901 | 0.97735613 |
| 2010320M18  | 433.218144 | -0.0228739 | 0.25578496 | -0.0894263 | 0.92874315 | 0.97322517 |
| Pfkfb2      | 1929.31997 | -0.0228816 | 0.26823705 | -0.0853035 | 0.93202011 | 0.97430464 |
| Eif4h       | 19626.8478 | -0.0228967 | 0.17662018 | -0.1296381 | 0.89685279 | 0.96132877 |
| Alox5ap     | 223.216628 | -0.0229602 | 0.41999525 | -0.0546678 | 0.95640309 | 0.98405248 |
| Slc7a6os    | 3704.93284 | -0.0230114 | 0.21211927 | -0.1084834 | 0.91361228 | 0.96775319 |
| Cdc42       | 23527.4939 | -0.0230142 | 0.18098392 | -0.1271617 | 0.89881242 | 0.96168428 |
| Ctrl        | 30.3586969 | -0.0230239 | 0.42135946 | -0.054642  | 0.9564237  | 0.98405248 |
| Sumo3       | 10092.7589 | -0.0230364 | 0.1807469  | -0.127451  | 0.89858343 | 0.96168428 |
| Tcn2        | 1985.29143 | -0.0231496 | 0.26902581 | -0.0860499 | 0.93142674 | 0.97430464 |
| Sacm1l      | 4979.59685 | -0.0232721 | 0.18736922 | -0.1242044 | 0.90115342 | 0.96269291 |
| Kcnab2      | 191.431757 | -0.0232913 | 0.2843199  | -0.0819194 | 0.9347108  | 0.97569448 |
| Sema4f      | 471.998839 | -0.0233574 | 0.20257943 | -0.1153    | 0.90820732 | 0.96498579 |
| Nanp        | 7.53444545 | -0.0233865 | 0.41438755 | -0.0564363 | 0.95499421 | 0.98369871 |
| Gm10532     | 147.35203  | -0.0236314 | 0.33389956 | -0.070774  | 0.94357759 | 0.97986765 |
| S100a14     | 45.3843536 | -0.023716  | 0.43221033 | -0.0548714 | 0.95624092 | 0.98405248 |
| Rtfdc1      | 4423.90959 | -0.0237312 | 0.19742583 | -0.1202031 | 0.90432223 | 0.96369802 |
| Slc2a4rg-ps | 183.418618 | -0.0237559 | 0.26854796 | -0.0884605 | 0.92951066 | 0.97371643 |
| Nabp2       | 1596.22194 | -0.0237638 | 0.16556782 | -0.1435289 | 0.88587248 | 0.95629154 |
| Osbp        | 3153.64182 | -0.0237797 | 0.19456219 | -0.1222216 | 0.90272351 | 0.96304131 |
| Smcr8       | 5493.72913 | -0.0238203 | 0.25276913 | -0.0942375 | 0.92492053 | 0.97150501 |

|             |            |            |            |            |            |            |
|-------------|------------|------------|------------|------------|------------|------------|
| Kifap3      | 5757.72017 | -0.0238442 | 0.18877768 | -0.1263083 | 0.89948787 | 0.9620024  |
| Cdk20       | 369.112949 | -0.0238454 | 0.2832708  | -0.0841788 | 0.93291426 | 0.9745902  |
| Acin1       | 18591.4547 | -0.0239192 | 0.18241477 | -0.1311251 | 0.89567636 | 0.96083244 |
| Ska3        | 3398.38771 | -0.0240173 | 0.18401467 | -0.1305184 | 0.8961563  | 0.96084712 |
| St3gal2     | 1996.72986 | -0.0241263 | 0.20513285 | -0.117613  | 0.90637427 | 0.96428995 |
| Tbc1d32     | 1039.5443  | -0.0241465 | 0.24521483 | -0.0984707 | 0.92155854 | 0.97033375 |
| Hmgn5       | 1606.11439 | -0.0241519 | 0.27087339 | -0.0891632 | 0.92895221 | 0.97332811 |
| Pin1rt1     | 1.58120563 | -0.0242708 | 0.26042223 | -0.0931977 | 0.9257465  | NA         |
| Marveld1    | 1095.27784 | -0.0242866 | 0.29473298 | -0.0824021 | 0.93432696 | 0.97558305 |
| Nosip       | 3964.76468 | -0.0243225 | 0.24336561 | -0.0999424 | 0.92039008 | 0.96990703 |
| Gad2        | 13.3227304 | -0.0243235 | 0.4322715  | -0.0562691 | 0.9551274  | 0.98369871 |
| Ttc1        | 4941.14096 | -0.0243801 | 0.22987617 | -0.1060575 | 0.91553673 | 0.96836839 |
| Hapln1      | 1.47417901 | -0.0243932 | 0.22523644 | -0.1083003 | 0.91375747 | NA         |
| Pidd1       | 1700.57133 | -0.0244314 | 0.23178095 | -0.1054075 | 0.9160525  | 0.96842504 |
| 2410004B18f | 1474.96938 | -0.024605  | 0.16856206 | -0.1459701 | 0.88394495 | 0.95575952 |
| Dgka        | 2524.55698 | -0.0246612 | 0.2870294  | -0.0859188 | 0.93153098 | 0.97430464 |
| Dmrt2       | 72.3882747 | -0.0247143 | 0.35665179 | -0.0692954 | 0.94475448 | 0.98017434 |
| Exd2        | 2789.66316 | -0.0247147 | 0.15895411 | -0.1554833 | 0.87644035 | 0.95266081 |
| Gata6       | 32.8008597 | -0.0247249 | 0.43151528 | -0.0572978 | 0.95430795 | 0.98346209 |
| Cast        | 4649.04224 | -0.0247484 | 0.17115351 | -0.1445975 | 0.88502864 | 0.95578308 |
| Cxcl9       | 1.19950921 | -0.0247621 | 0.1836704  | -0.1348183 | 0.89275551 | NA         |
| Lrp5        | 4575.69089 | -0.024813  | 0.21411729 | -0.1158851 | 0.90774363 | 0.96495598 |
| Usp9y       | 30.7136429 | -0.0249096 | 0.25007434 | -0.0996087 | NA         | NA         |
| Cyp2j13     | 1.13326545 | -0.0249975 | 0.20909543 | -0.1195505 | 0.90483925 | NA         |
| Sult1c1     | 1.13326545 | -0.0249975 | 0.20909543 | -0.1195505 | 0.90483925 | NA         |
| 9830132P13f | 1.13326545 | -0.0249975 | 0.20909543 | -0.1195505 | 0.90483925 | NA         |
| 2310005G13f | 3.2544261  | -0.0250122 | 0.37526761 | -0.0666516 | 0.9468591  | NA         |
| Shc4        | 18.448207  | -0.025022  | 0.42808872 | -0.0584505 | 0.95338981 | 0.98295517 |
| Tram2       | 380.128408 | -0.0250405 | 0.21877597 | -0.1144571 | 0.90887545 | 0.96531171 |
| Fars2       | 1308.32603 | -0.0250518 | 0.2325867  | -0.1077095 | 0.91422612 | 0.96812002 |
| Ptk6        | 2.69941805 | -0.0250759 | 0.2858144  | -0.0877347 | 0.9300875  | NA         |
| Dmrtb1      | 56.5957443 | -0.0250841 | 0.41870187 | -0.0599091 | 0.95222802 | 0.98262097 |
| Sfswap      | 4341.44537 | -0.0252113 | 0.20977108 | -0.1201849 | 0.90433666 | 0.96369802 |
| Lpcat3      | 6557.35859 | -0.0253166 | 0.21077061 | -0.1201143 | 0.90439258 | 0.96369802 |
| D17Wsu92e   | 8525.30578 | -0.025419  | 0.18058958 | -0.1407554 | 0.88806318 | 0.95725292 |
| Anapc13     | 2444.59041 | -0.0254285 | 0.21408426 | -0.118778  | 0.9054512  | 0.96404417 |
| Slc25a1     | 9104.13263 | -0.0254848 | 0.22435818 | -0.1135897 | 0.90956302 | 0.96556861 |
| Hyal2       | 2472.47141 | -0.0255138 | 0.19977292 | -0.127714  | 0.89837527 | 0.96162064 |
| Cdh1        | 54535.5014 | -0.0255397 | 0.20279709 | -0.1259374 | 0.89978147 | 0.96214685 |
| D10Wsu102e  | 4856.84058 | -0.0255564 | 0.24735346 | -0.1033194 | 0.91770947 | 0.96891454 |
| Park7       | 13283.5648 | -0.0255711 | 0.20714695 | -0.1234444 | 0.90175519 | 0.96270877 |

|          |            |            |            |            |            |            |
|----------|------------|------------|------------|------------|------------|------------|
| Rnaseh1  | 2246.41437 | -0.0256257 | 0.23669744 | -0.1082636 | 0.91378664 | 0.96787195 |
| Utp11l   | 4266.38826 | -0.0256593 | 0.19287401 | -0.1330368 | 0.89416426 | 0.96010139 |
| Cdh26    | 3.66047995 | -0.025749  | 0.34601045 | -0.0744169 | 0.94067868 | NA         |
| Bloc1s4  | 872.92885  | -0.0258034 | 0.20677194 | -0.1247916 | 0.90068857 | 0.96269291 |
| Ruvbl1   | 4081.60104 | -0.0258669 | 0.1844651  | -0.1402268 | 0.88848082 | 0.95732618 |
| Hbp1     | 5326.59723 | -0.0259266 | 0.19283514 | -0.1344497 | 0.89304697 | 0.95969687 |
| Klrb1c   | 6.18752571 | -0.02593   | 0.41076669 | -0.0631258 | 0.94966634 | 0.98154069 |
| Cyp4a10  | 1.68987894 | -0.0259357 | 0.29350334 | -0.088366  | 0.92958579 | NA         |
| Scn2a1   | 29.9829081 | -0.0260087 | 0.43180037 | -0.0602332 | 0.95196991 | 0.98255021 |
| Golga7   | 5521.56964 | -0.0260307 | 0.18279481 | -0.142404  | 0.88676089 | 0.95661824 |
| Tpm1     | 4451.00779 | -0.0260352 | 0.24804431 | -0.1049621 | 0.9164059  | 0.96866695 |
| Rrm1     | 23579.9004 | -0.0261059 | 0.18002922 | -0.1450093 | 0.88470356 | 0.95578308 |
| Stt3a    | 21224.3228 | -0.0261192 | 0.1451609  | -0.1799324 | 0.85720562 | 0.94535172 |
| Zfp46    | 360.237152 | -0.0261353 | 0.30584693 | -0.0854523 | 0.93190178 | 0.97430464 |
| Nufip1   | 5526.09446 | -0.0262352 | 0.17620824 | -0.1488877 | 0.88164228 | 0.95498135 |
| Rab10os  | 295.4282   | -0.0263112 | 0.21624464 | -0.1216731 | 0.90315793 | 0.96324484 |
| Rars2    | 4013.20505 | -0.0263326 | 0.18090627 | -0.1455594 | 0.88426921 | 0.95575952 |
| Fgf8     | 18.580701  | -0.0263979 | 0.43224922 | -0.0610709 | 0.95130272 | 0.98235672 |
| Gar1     | 3564.70353 | -0.0264125 | 0.18136125 | -0.1456348 | 0.88420967 | 0.95575952 |
| Adamts19 | 5.86452419 | -0.0264375 | 0.40077372 | -0.0659662 | 0.94740475 | NA         |
| Pebp4    | 0.7780404  | -0.0264445 | 0.18039898 | -0.1465892 | 0.88345625 | NA         |
| Pabpn1l  | 0.7780404  | -0.0264445 | 0.18039898 | -0.1465892 | 0.88345625 | NA         |
| Iba57    | 430.016683 | -0.0265799 | 0.20923959 | -0.1270308 | 0.898916   | 0.96168428 |
| Atp1b3   | 8808.13073 | -0.0265949 | 0.19833362 | -0.134092  | 0.89332984 | 0.95980188 |
| Tubgcp2  | 3973.58273 | -0.0266206 | 0.16109259 | -0.1652503 | 0.86874698 | 0.94932783 |
| Zfp91    | 4767.15347 | -0.0266673 | 0.16398993 | -0.1626154 | 0.87082124 | 0.95028556 |
| Serpib1b | 98.375748  | -0.0266896 | 0.3576109  | -0.074633  | 0.94050671 | 0.97844661 |
| Commd3   | 2724.05644 | -0.0267371 | 0.21989619 | -0.1215897 | 0.90322399 | 0.96324484 |
| Ptcd1    | 2327.77655 | -0.0268359 | 0.23217177 | -0.1155862 | 0.90798047 | 0.96495598 |
| Gmcl1    | 3834.01197 | -0.0268686 | 0.21324276 | -0.1260002 | 0.8997318  | 0.96214685 |
| Crcp     | 2296.81764 | -0.0268754 | 0.1669689  | -0.1609606 | 0.8721244  | 0.95107339 |
| Ccdc53   | 1919.08954 | -0.0268851 | 0.27140748 | -0.0990581 | 0.92109215 | 0.97000537 |
| Akap11   | 4643.18173 | -0.0268903 | 0.22453326 | -0.1197608 | 0.90467265 | 0.96383243 |
| Fam168b  | 8255.17593 | -0.026917  | 0.17988668 | -0.1496328 | 0.8810543  | 0.9546085  |
| Abtb1    | 2098.58808 | -0.0269222 | 0.24633271 | -0.1092919 | 0.91297101 | 0.96727157 |
| Dpm1     | 3206.66521 | -0.026972  | 0.20402149 | -0.1322017 | 0.89482479 | 0.96038316 |
| Gm101    | 6.4094643  | -0.0270599 | 0.41415442 | -0.0653376 | 0.94790521 | 0.98083012 |
| Lins     | 951.02144  | -0.0271691 | 0.18930759 | -0.1435181 | 0.88588103 | 0.95629154 |
| Tnp2     | 1.44280298 | -0.0271938 | 0.22145862 | -0.1227942 | 0.90227006 | NA         |
| Zfp236   | 2390.85927 | -0.0272153 | 0.22766373 | -0.1195415 | 0.90484639 | 0.96385138 |
| Spag17   | 1.66504461 | -0.0272541 | 0.32445712 | -0.0839991 | 0.93305714 | NA         |

|             |            |            |            |            |            |            |
|-------------|------------|------------|------------|------------|------------|------------|
| Esrra       | 1139.08038 | -0.0272599 | 0.22416199 | -0.1216083 | 0.90320927 | 0.96324484 |
| Klf8        | 5041.24291 | -0.0273525 | 0.23614489 | -0.1158292 | 0.90778792 | 0.96495598 |
| Gm5634      | 1.15259363 | -0.0274964 | 0.20988311 | -0.1310081 | 0.8957689  | NA         |
| Tars2       | 4482.54217 | -0.0275017 | 0.17126231 | -0.1605824 | 0.87242229 | 0.95113846 |
| Ptpn1       | 2438.26974 | -0.0275302 | 0.20010954 | -0.1375757 | 0.89057575 | 0.9584185  |
| Al429214    | 36.6609069 | -0.0276656 | 0.42446639 | -0.0651774 | 0.94803277 | 0.98083012 |
| Timm8a2     | 592.910337 | -0.0278236 | 0.30062315 | -0.092553  | 0.92625866 | 0.97229279 |
| Zfp831      | 1.07177305 | -0.0279909 | 0.20600512 | -0.1358748 | 0.89192028 | NA         |
| Supv3l1     | 4596.20161 | -0.0280503 | 0.17691436 | -0.1585527 | 0.87402128 | 0.95188073 |
| Zscan2      | 280.47435  | -0.0281304 | 0.26774461 | -0.1050644 | 0.91632467 | 0.96864693 |
| Tada2a      | 6946.98303 | -0.0282115 | 0.1928967  | -0.146252  | 0.88372249 | 0.95568774 |
| Actn1       | 19049.348  | -0.0282599 | 0.18148226 | -0.155717  | 0.87625613 | 0.95264675 |
| Arhgef12    | 4474.26946 | -0.0282723 | 0.22709695 | -0.1244945 | 0.90092376 | 0.96269291 |
| Snord111    | 3.0358546  | -0.0283011 | 0.3517022  | -0.080469  | 0.93586427 | NA         |
| Pin4        | 532.690517 | -0.0283767 | 0.2382041  | -0.1191278 | 0.90517412 | 0.96400238 |
| Cep85       | 5656.51912 | -0.0284296 | 0.15147829 | -0.1876807 | 0.85112693 | 0.94351307 |
| Pigu        | 2400.44261 | -0.0285324 | 0.16515151 | -0.1727652 | 0.86283601 | 0.94679387 |
| Cdk12       | 7036.14046 | -0.0285842 | 0.31139721 | -0.0917933 | 0.9268623  | 0.97238317 |
| Dpp10       | 2.96705963 | -0.0286099 | 0.29320084 | -0.0975778 | 0.92226752 | NA         |
| Anapc11     | 3524.40666 | -0.0286556 | 0.21230755 | -0.1349723 | 0.89263378 | 0.95958049 |
| Mir3068     | 14.4948462 | -0.0286822 | 0.42955569 | -0.0667719 | 0.94676329 | 0.98072348 |
| Slc39a8     | 9.07076249 | -0.0287538 | 0.42617156 | -0.06747   | 0.94620751 | 0.98057263 |
| Dyrk1a      | 4743.26859 | -0.0287646 | 0.20142186 | -0.1428079 | 0.88644188 | 0.95661824 |
| Wnk3        | 1716.95067 | -0.0288871 | 0.29051699 | -0.0994334 | 0.92079418 | 0.96990703 |
| Thoc3       | 4716.34816 | -0.0289522 | 0.18899375 | -0.1531915 | 0.87824729 | 0.95329223 |
| Ptprh       | 2.95866646 | -0.029008  | 0.35587415 | -0.081512  | 0.9350348  | NA         |
| Fam126a     | 1154.26721 | -0.029043  | 0.30700578 | -0.0946008 | 0.92463195 | 0.9714195  |
| Rnf10       | 21045.8167 | -0.0290641 | 0.17282447 | -0.1681714 | 0.86644842 | 0.94848229 |
| Dcp2        | 15170.5353 | -0.0290783 | 0.21410352 | -0.135814  | 0.89196831 | 0.95913423 |
| Gpr84       | 1.94006311 | -0.0291247 | 0.30995225 | -0.0939652 | 0.92513683 | NA         |
| Snord4a     | 74.8306082 | -0.0291988 | 0.33620506 | -0.0868481 | 0.93079225 | 0.97430464 |
| Sypl2       | 17.9121164 | -0.0292108 | 0.42168375 | -0.0692718 | 0.94477329 | 0.98017434 |
| Plp2        | 5405.41158 | -0.029218  | 0.16339945 | -0.1788132 | 0.85808437 | 0.9455234  |
| Znhit1      | 1506.17379 | -0.0292817 | 0.21723811 | -0.1347907 | 0.89277736 | 0.95958049 |
| 1700102P08F | 74.3384958 | -0.0292832 | 0.36253816 | -0.0807728 | 0.93562263 | 0.97617361 |
| Uba2        | 42845.58   | -0.0293471 | 0.16595697 | -0.1768357 | 0.85963744 | 0.9455234  |
| Rps6ka1     | 9532.93246 | -0.0294324 | 0.20721443 | -0.1420383 | 0.88704974 | 0.95675617 |
| Vars2       | 2736.51478 | -0.0294433 | 0.19513437 | -0.1508871 | 0.88006474 | 0.95411927 |
| Hivep1      | 1615.70139 | -0.0295114 | 0.27668182 | -0.106662  | 0.91505712 | 0.96836839 |
| Snx16       | 1677.27628 | -0.0295269 | 0.18593667 | -0.1588007 | 0.87382587 | 0.95173456 |
| Krt42       | 1644.62191 | -0.0295542 | 0.43203061 | -0.0684077 | 0.94546108 | 0.98027294 |



|             |            |            |            |            |            |            |
|-------------|------------|------------|------------|------------|------------|------------|
| Rps27l      | 17281.2556 | -0.0296494 | 0.18309945 | -0.1619308 | 0.87136036 | 0.95068811 |
| Rps11       | 50852.6454 | -0.0297036 | 0.16376128 | -0.1813837 | 0.85606645 | 0.9447654  |
| Mylk2       | 5.6638937  | -0.0297487 | 0.37967707 | -0.0783526 | 0.93754762 | NA         |
| Alx1        | 4.19877214 | -0.0298003 | 0.38026354 | -0.0783676 | 0.93753566 | NA         |
| C530005A16f | 23.9953654 | -0.0298579 | 0.41245837 | -0.07239   | 0.94229156 | 0.97906786 |
| Tra2b       | 16863.5638 | -0.0299298 | 0.18408734 | -0.1625845 | 0.87084557 | 0.95028556 |
| Treh        | 1.32111265 | -0.0300115 | 0.27776385 | -0.1080468 | 0.91395854 | NA         |
| Smyd3       | 2385.97162 | -0.0300494 | 0.20404021 | -0.1472717 | 0.88291755 | 0.95554672 |
| 4732471J01R | 63.4950097 | -0.0301448 | 0.34985969 | -0.0861624 | 0.9313373  | 0.97430464 |
| Cln8        | 2664.20532 | -0.0301703 | 0.20912344 | -0.1442702 | 0.88528708 | 0.95578308 |
| Cdk11b      | 8718.69705 | -0.0302163 | 0.17993164 | -0.1679319 | 0.86663687 | 0.94861203 |
| Cdk13       | 5669.91756 | -0.0302363 | 0.19973596 | -0.1513815 | 0.87967477 | 0.95385748 |
| Prss22      | 1.65524786 | -0.0302697 | 0.32047101 | -0.0944538 | 0.92474869 | NA         |
| Phka2       | 2058.01638 | -0.0302853 | 0.16861401 | -0.1796134 | 0.85745607 | 0.94538792 |
| Acp1        | 3062.39951 | -0.0303414 | 0.3328309  | -0.0911616 | 0.92736416 | 0.97266045 |
| Stk11       | 3602.14738 | -0.0303727 | 0.19504702 | -0.1557198 | 0.87625392 | 0.95264675 |
| Fam107a     | 16.1012635 | -0.0304595 | 0.43227035 | -0.0704641 | 0.94382431 | 0.97986765 |
| Tmem179b    | 1089.73785 | -0.0305872 | 0.17782428 | -0.172008  | 0.86343121 | 0.94702747 |
| Grsf1       | 16460.7926 | -0.0307073 | 0.25169413 | -0.1220026 | 0.90289698 | 0.96309686 |
| C1galt1     | 1519.1984  | -0.0307228 | 0.25009049 | -0.1228467 | 0.90222851 | 0.96284351 |
| 4931429I11R | 1.13112641 | -0.0308089 | 0.20913193 | -0.1473179 | 0.88288108 | NA         |
| Fmr1nb      | 2915.65469 | -0.0308191 | 0.22513687 | -0.1368905 | 0.89111736 | 0.95858894 |
| Pex5        | 3721.41418 | -0.0308583 | 0.20144251 | -0.1531867 | 0.87825105 | 0.95329223 |
| Rab23       | 2685.57092 | -0.030861  | 0.22454828 | -0.1374357 | 0.8906864  | 0.9584185  |
| Psmg3       | 973.471637 | -0.030866  | 0.21576502 | -0.1430538 | 0.88624765 | 0.9565545  |
| Kidins220   | 3670.54761 | -0.0309143 | 0.20185538 | -0.1531509 | 0.87827925 | 0.95329223 |
| Prdx1       | 94281.3566 | -0.0310145 | 0.17569092 | -0.1765288 | 0.85987854 | 0.9455234  |
| Cryab       | 190.168282 | -0.0310533 | 0.30365399 | -0.1022654 | 0.91854605 | 0.96908478 |
| Pck1        | 0.76549058 | -0.0310539 | 0.18685218 | -0.1661948 | 0.86800363 | NA         |
| Serpina12   | 0.76549058 | -0.0310539 | 0.18685218 | -0.1661948 | 0.86800363 | NA         |
| Mup3        | 0.75294075 | -0.03107   | 0.18012189 | -0.1724945 | 0.86304875 | NA         |
| Osgin1      | 27.4433634 | -0.0310834 | 0.41531185 | -0.0748434 | 0.94033929 | 0.97844661 |
| Ccdc127     | 3933.82739 | -0.0311438 | 0.16845893 | -0.1848746 | 0.8533274  | 0.94431772 |
| Homer3      | 2553.09259 | -0.0311471 | 0.17551397 | -0.1774625 | 0.85914512 | 0.9455234  |
| Aplp1       | 3832.44103 | -0.0311687 | 0.31345055 | -0.0994375 | 0.92079094 | 0.96990703 |
| Mrpl52      | 3116.21987 | -0.0311961 | 0.22496154 | -0.1386729 | 0.88970862 | 0.9580332  |
| Prkg1       | 7.63345595 | -0.0311969 | 0.40798343 | -0.076466  | 0.93904838 | 0.97791076 |
| Urah        | 633.755177 | -0.0312698 | 0.22853694 | -0.1368261 | 0.89116828 | 0.95858894 |
| Nde1        | 6757.40226 | -0.0313356 | 0.16287438 | -0.1923911 | 0.84743584 | 0.94147896 |
| Pcdhga3     | 40.4802273 | -0.0313622 | 0.38403106 | -0.0816658 | 0.93491245 | 0.97569448 |
| Josd1       | 2625.14145 | -0.0314083 | 0.15465012 | -0.2030927 | 0.83906259 | 0.93837763 |

|             |            |            |            |            |            |            |
|-------------|------------|------------|------------|------------|------------|------------|
| 4930525G20I | 9.98377373 | -0.0314382 | 0.42218502 | -0.0744655 | 0.94064    | 0.9784723  |
| Dmkn        | 10.1937546 | -0.0314841 | 0.42726262 | -0.0736879 | 0.94125871 | 0.97866806 |
| Fbxo21      | 4615.18405 | -0.0316476 | 0.21919092 | -0.1443837 | 0.88519752 | 0.95578308 |
| Gpx4        | 19217.9466 | -0.0316519 | 0.32970135 | -0.0960018 | 0.92351917 | 0.9711175  |
| Olf459      | 0.85859565 | -0.0316854 | 0.18117408 | -0.1748895 | 0.86116645 | NA         |
| Dynlr2      | 0.85859565 | -0.0316854 | 0.18117408 | -0.1748895 | 0.86116645 | NA         |
| Art3        | 16.1556594 | -0.0318344 | 0.43221814 | -0.0736537 | 0.94128597 | 0.97866806 |
| Trappc11    | 5439.43026 | -0.0319645 | 0.21037811 | -0.1519382 | 0.87923569 | 0.95385748 |
| Trak2       | 3085.8197  | -0.0319783 | 0.20632127 | -0.1549928 | 0.87682702 | 0.95290135 |
| Zbtb12      | 1568.30622 | -0.0319892 | 0.22135366 | -0.1445161 | 0.88509298 | 0.95578308 |
| Zfp770      | 2469.54609 | -0.0320175 | 0.22491172 | -0.142356  | 0.88679882 | 0.95661824 |
| Spns2       | 117.268921 | -0.0320531 | 0.28600108 | -0.1120733 | 0.91076533 | 0.96611948 |
| Ccdc65      | 44.2332711 | -0.0320589 | 0.39685785 | -0.0807818 | 0.9356155  | 0.97617361 |
| Golph3l     | 2963.7372  | -0.0320978 | 0.16594801 | -0.1934207 | 0.84662953 | 0.94147896 |
| H2afy3      | 1.68712587 | -0.0321141 | 0.32470895 | -0.0989013 | 0.92121662 | NA         |
| C130083M11  | 1.73151892 | -0.0321166 | 0.26655152 | -0.1204893 | 0.90409554 | NA         |
| Rab11fip2   | 415.28346  | -0.0321581 | 0.25889714 | -0.1242118 | 0.90114754 | 0.96269291 |
| Atf7        | 344.833701 | -0.0321667 | 0.34839031 | -0.0923294 | 0.92643632 | 0.97229279 |
| Sdf4        | 7497.87635 | -0.032248  | 0.17518028 | -0.1840847 | 0.85394705 | 0.94431772 |
| Ly6g5c      | 14.747294  | -0.0322507 | 0.43021895 | -0.0749634 | 0.9402438  | 0.97844661 |
| Pmpca       | 11834.8446 | -0.0322649 | 0.15709265 | -0.2053878 | 0.83726917 | 0.93732437 |
| Snord65     | 169.188499 | -0.0322934 | 0.2975312  | -0.1085377 | 0.91356917 | 0.96775319 |
| Ccnj1       | 276.7529   | -0.0324412 | 0.39710876 | -0.0816936 | 0.93489039 | 0.97569448 |
| Pvr         | 2341.54068 | -0.0326406 | 0.18466818 | -0.1767529 | 0.85970252 | 0.9455234  |
| Cpa6        | 0.80012166 | -0.0326994 | 0.19059444 | -0.1715655 | 0.86377916 | NA         |
| Tln2        | 5111.92203 | -0.0327791 | 0.26609096 | -0.1231877 | 0.90195849 | 0.96270877 |
| Ccdc43      | 13762.5615 | -0.032829  | 0.18411453 | -0.1783074 | 0.85848156 | 0.9455234  |
| Pepd        | 3129.92879 | -0.0329844 | 0.20468894 | -0.1611442 | 0.87197981 | 0.95105611 |
| Ifnl2       | 0.83376133 | -0.0329961 | 0.19261306 | -0.1713078 | 0.86398173 | NA         |
| Kcnj2       | 2.39268385 | -0.033     | 0.33714616 | -0.0978803 | 0.92202732 | NA         |
| Ctnnbl1     | 4865.80717 | -0.0331861 | 0.1871382  | -0.177335  | 0.8592453  | 0.9455234  |
| Gm19705     | 197.558363 | -0.033191  | 0.32895182 | -0.1008993 | 0.91963039 | 0.96959357 |
| Ppil1       | 7675.07493 | -0.0332213 | 0.19646041 | -0.1690991 | 0.86571866 | 0.94808387 |
| Cdh6        | 3.88869492 | -0.0333825 | 0.37972774 | -0.0879116 | 0.92994691 | NA         |
| Il12b       | 2.36895299 | -0.033429  | 0.34379207 | -0.0972362 | 0.9225388  | NA         |
| Evi5        | 6616.02216 | -0.0334632 | 0.23623954 | -0.1416493 | 0.88735701 | 0.95687535 |
| Mpo         | 0.8365144  | -0.0334767 | 0.19278047 | -0.1736521 | 0.86213889 | NA         |
| Katnb1      | 2090.00198 | -0.0336092 | 0.23776789 | -0.1413531 | 0.88759098 | 0.95694172 |
| Rab11fip4   | 3664.3873  | -0.0336104 | 0.24035413 | -0.1398371 | 0.88878868 | 0.95743646 |
| Mcts2       | 2248.82164 | -0.0336226 | 0.19082184 | -0.176199  | 0.8601376  | 0.9455234  |
| Sesn2       | 5725.02779 | -0.033669  | 0.23719891 | -0.1419442 | 0.8871241  | 0.95677002 |

|             |            |            |            |            |            |            |
|-------------|------------|------------|------------|------------|------------|------------|
| Arpc3       | 8255.31008 | -0.0336746 | 0.19181404 | -0.1755586 | 0.8606407  | 0.94567701 |
| Zranb1      | 2462.05424 | -0.0336895 | 0.17514295 | -0.1923543 | 0.84746471 | 0.94147896 |
| Nup54       | 5931.42826 | -0.0337576 | 0.17992206 | -0.1876235 | 0.85117177 | 0.94351307 |
| Slc30a7     | 2198.02407 | -0.0337707 | 0.19573792 | -0.1725303 | 0.86302067 | 0.94692969 |
| 1700021F05F | 2592.33004 | -0.0338117 | 0.23729122 | -0.1424902 | 0.88669278 | 0.95661824 |
| Ssbp1       | 5496.77674 | -0.0338762 | 0.19384351 | -0.1747606 | 0.86126777 | 0.94587395 |
| Ethe1       | 859.684166 | -0.0339901 | 0.23813906 | -0.1427321 | 0.8865018  | 0.95661824 |
| Erlin1      | 3990.93873 | -0.0340277 | 0.17695155 | -0.1922994 | 0.84750768 | 0.94147896 |
| Dync1h1     | 29152.6783 | -0.0340278 | 0.25902891 | -0.1313666 | 0.89548529 | 0.96072382 |
| Harbi1      | 1585.00982 | -0.0340337 | 0.17000081 | -0.2001971 | 0.84132647 | 0.93943189 |
| Tob1        | 4729.27005 | -0.0340959 | 0.18835907 | -0.1810156 | 0.85635534 | 0.9448845  |
| Wrb         | 2901.05537 | -0.0341148 | 0.18551224 | -0.183895  | 0.85409584 | 0.94431772 |
| Scfd1       | 5164.93502 | -0.0341732 | 0.16578956 | -0.206124  | 0.83669403 | 0.93698697 |
| Shank3      | 397.546489 | -0.0342376 | 0.3499521  | -0.0978351 | 0.92206322 | 0.97043051 |
| Gm3716      | 35.2592515 | -0.034258  | 0.40460688 | -0.0846699 | 0.93252385 | 0.97431325 |
| Mrps28      | 2821.03813 | -0.0342649 | 0.195535   | -0.1752365 | 0.86089383 | 0.94567701 |
| Ccdc94      | 643.167211 | -0.0342807 | 0.18515199 | -0.1851489 | 0.85311221 | 0.94431772 |
| Trim26      | 4258.72144 | -0.0343426 | 0.19550369 | -0.175662  | 0.86055948 | 0.94567701 |
| 6330408A02f | 202.956789 | -0.0344165 | 0.27257494 | -0.1262644 | 0.89952266 | 0.9620024  |
| Tmod4       | 34.332604  | -0.0344994 | 0.43213731 | -0.0798344 | 0.93636898 | 0.97662468 |
| Pex11g      | 148.464772 | -0.034533  | 0.31728086 | -0.1088405 | 0.91332898 | 0.96758492 |
| Rfc5        | 9580.4982  | -0.0346462 | 0.16413012 | -0.2110899 | 0.83281709 | 0.93498494 |
| 9330182L06F | 171.214685 | -0.0346514 | 0.4064782  | -0.085248  | 0.93206427 | 0.97430464 |
| Tasp1       | 897.866305 | -0.0347023 | 0.2176667  | -0.1594287 | 0.87333114 | 0.95171748 |
| Uchl3       | 7194.42804 | -0.0347909 | 0.19057952 | -0.1825534 | 0.85514842 | 0.94458789 |
| Urgcp       | 1061.48321 | -0.0348316 | 0.35042579 | -0.099398  | 0.92082229 | 0.96990703 |
| Snrpe       | 9851.94214 | -0.0349616 | 0.19735133 | -0.1771539 | 0.8593875  | 0.9455234  |
| 1700096K18F | 122.165176 | -0.0349949 | 0.3066713  | -0.114112  | 0.90914898 | 0.96532677 |
| Dcun1d4     | 2683.6005  | -0.0350933 | 0.19088837 | -0.1838422 | 0.85413722 | 0.94431772 |
| Lpin1       | 4523.89083 | -0.0351509 | 0.23067529 | -0.1523827 | 0.87888514 | 0.95370475 |
| Aurkaip1    | 6040.29526 | -0.0351538 | 0.20459653 | -0.1718199 | 0.86357912 | 0.94702747 |
| 4930481A15f | 13.5859819 | -0.0351991 | 0.4306822  | -0.0817288 | 0.93486237 | 0.97569448 |
| Pik3r4      | 5251.31889 | -0.0352461 | 0.24093921 | -0.1462863 | 0.8836954  | 0.95568774 |
| Orc2        | 11422.2958 | -0.0354684 | 0.17145351 | -0.2068688 | 0.83611235 | 0.93697364 |
| Nfkbid      | 343.557203 | -0.035479  | 0.27731125 | -0.1279394 | 0.89819692 | 0.96162064 |
| Stx18       | 1021.6154  | -0.0355167 | 0.17706925 | -0.2005806 | 0.84102656 | 0.93940315 |
| Arhgef18    | 9802.08578 | -0.0355309 | 0.19280661 | -0.1842826 | 0.85379179 | 0.94431772 |
| Ttc39b      | 8224.44683 | -0.0355721 | 0.21393378 | -0.1662764 | 0.86793941 | 0.94911228 |
| G6pdx       | 5512.94055 | -0.0355999 | 0.16035959 | -0.2220006 | 0.82431345 | 0.93107393 |
| 7-Sep       | 18766.4596 | -0.0357572 | 0.2027014  | -0.1764033 | 0.8599771  | 0.9455234  |
| Mrpl18      | 6752.44274 | -0.035827  | 0.1791804  | -0.1999492 | 0.84152028 | 0.93957883 |

|             |            |            |            |            |            |            |
|-------------|------------|------------|------------|------------|------------|------------|
| Gsdmc4      | 18.8302744 | -0.035828  | 0.42742422 | -0.083823  | 0.93319715 | 0.97467283 |
| 4930506C21F | 0.82220291 | -0.0360122 | 0.19201001 | -0.187554  | 0.85122632 | NA         |
| Gm5547      | 0.82220291 | -0.0360122 | 0.19201001 | -0.187554  | 0.85122632 | NA         |
| Kdf1        | 299.367569 | -0.0360449 | 0.31560646 | -0.1142082 | 0.90907272 | 0.96531171 |
| Cul9        | 191.812918 | -0.036052  | 0.28339758 | -0.1272137 | 0.89877129 | 0.96168428 |
| Ascc3       | 4466.77446 | -0.0361288 | 0.2329723  | -0.1550776 | 0.87676016 | 0.95290135 |
| Raf1        | 10732.9168 | -0.0361652 | 0.15461485 | -0.2339053 | 0.81505846 | 0.9292503  |
| Slc6a5      | 3.95831833 | -0.0362256 | 0.29635529 | -0.122237  | 0.90271135 | NA         |
| Zfp82       | 927.85692  | -0.0362665 | 0.19904162 | -0.1822055 | 0.85542144 | 0.94458789 |
| Gm20556     | 12.9932863 | -0.0363051 | 0.3870461  | -0.0938006 | 0.92526758 | 0.9715622  |
| Pfdn2       | 4765.01802 | -0.0364135 | 0.18246869 | -0.1995601 | 0.84182463 | 0.93972068 |
| Nphp1       | 1074.42444 | -0.0364885 | 0.19577402 | -0.1863809 | 0.85214605 | 0.94392216 |
| Glo1        | 5812.50662 | -0.0365583 | 0.18444693 | -0.1982047 | 0.84288489 | 0.94022688 |
| Rmdn1       | 322.948022 | -0.0366387 | 0.34979802 | -0.1047426 | 0.91658008 | 0.96871937 |
| Dpyd        | 2.1946625  | -0.0367404 | 0.2807995  | -0.1308422 | 0.89590011 | NA         |
| Thap4       | 3580.67344 | -0.0367503 | 0.16701076 | -0.2200478 | 0.82583394 | 0.93152509 |
| Foxn1       | 12.2567346 | -0.0367728 | 0.43193283 | -0.0851356 | 0.93215362 | 0.97430464 |
| Camsap2     | 3281.29521 | -0.0367796 | 0.22374321 | -0.1643829 | 0.86942973 | 0.94947343 |
| Bag1        | 8175.37713 | -0.0368132 | 0.18359081 | -0.2005175 | 0.84107589 | 0.93940315 |
| Tfe3        | 5157.80798 | -0.0368729 | 0.22935275 | -0.1607693 | 0.87227511 | 0.95107339 |
| Zfp870      | 2963.26324 | -0.0368947 | 0.16812224 | -0.2194517 | 0.82629824 | 0.93166673 |
| Jakmip3     | 1.85374894 | -0.0370491 | 0.26856543 | -0.1379517 | 0.89027859 | NA         |
| Ino80e      | 3902.08895 | -0.0370595 | 0.22691397 | -0.1633198 | 0.87026666 | 0.94998715 |
| Gm11974     | 1912.36936 | -0.0371108 | 0.21640553 | -0.1714874 | 0.86384057 | 0.94702747 |
| Lgals7      | 49.6744359 | -0.0371361 | 0.42924327 | -0.0865153 | 0.93105683 | 0.97430464 |
| Polr2a      | 25226.2854 | -0.0371788 | 0.27648829 | -0.1344681 | 0.89303245 | 0.95969687 |
| Gcc1        | 1264.93614 | -0.0372144 | 0.18923545 | -0.1966567 | 0.84409617 | 0.94103803 |
| Gpr56       | 1467.35085 | -0.0372219 | 0.34796225 | -0.1069712 | 0.91481186 | 0.96832729 |
| Nudt4       | 12361.1887 | -0.0372535 | 0.2713509  | -0.1372889 | 0.89080245 | 0.95846933 |
| Lyve1       | 0.775022   | -0.0372798 | 0.1891345  | -0.1971075 | 0.84374345 | NA         |
| Mok         | 2325.98907 | -0.0373052 | 0.28926744 | -0.1289643 | 0.8973859  | 0.96153958 |
| Ttll4       | 3703.02066 | -0.0373766 | 0.26242705 | -0.1424265 | 0.88674313 | 0.95661824 |
| lpw         | 2.42589588 | -0.0374422 | 0.31496021 | -0.1188792 | 0.90537104 | NA         |
| Ugt1a6a     | 1.85650201 | -0.0374986 | 0.2686015  | -0.1396068 | 0.88897067 | NA         |
| Zfp809      | 2962.82518 | -0.0375306 | 0.1718087  | -0.2184441 | 0.82708313 | 0.93195926 |
| Cercam      | 1615.1777  | -0.0375859 | 0.19142484 | -0.1963482 | 0.84433761 | 0.94115145 |
| Col4a2      | 842.291296 | -0.037607  | 0.43221341 | -0.0870103 | 0.93066332 | 0.97430464 |
| Cdc42bpg    | 3858.33873 | -0.0376136 | 0.20373543 | -0.1846197 | 0.85352734 | 0.94431772 |
| Mir7115     | 5.79603544 | -0.037615  | 0.40918816 | -0.091926  | 0.92675682 | NA         |
| Rbl2        | 915.720601 | -0.0376336 | 0.25928681 | -0.1451426 | 0.88459829 | 0.95576934 |
| Plekhf2     | 13430.6153 | -0.0376432 | 0.16010394 | -0.2351173 | 0.81411772 | 0.92878688 |

|             |            |            |            |            |            |            |
|-------------|------------|------------|------------|------------|------------|------------|
| Gm12338     | 28.0659553 | -0.0376765 | 0.40063128 | -0.0940429 | 0.9250751  | 0.97150501 |
| S100pbp     | 3266.72572 | -0.037681  | 0.22901171 | -0.1645375 | 0.86930806 | 0.94941665 |
| Rspo1       | 32.4671615 | -0.0376962 | 0.41858238 | -0.0900568 | 0.92824209 | 0.97288637 |
| Eif4g2      | 94740.2877 | -0.0377167 | 0.20590257 | -0.1831775 | 0.85465877 | 0.94455253 |
| Sprtn       | 1005.601   | -0.0377239 | 0.27409977 | -0.1376284 | 0.89053409 | 0.9584185  |
| Vps51       | 1722.06622 | -0.0377786 | 0.19855389 | -0.190269  | 0.84909838 | 0.94242587 |
| Dhrs9       | 1.7171913  | -0.0378044 | 0.19734322 | -0.1915668 | 0.84808158 | NA         |
| Tmtc2       | 96.1506398 | -0.0379191 | 0.36378584 | -0.1042347 | 0.91698313 | 0.96879329 |
| Snrnp70     | 21552.7218 | -0.0381636 | 0.16818982 | -0.2269081 | 0.82049519 | 0.930536   |
| Gm3558      | 46.0370896 | -0.0381718 | 0.424091   | -0.0900086 | 0.92828036 | 0.97288637 |
| Fau         | 17158.4048 | -0.0382191 | 0.22844022 | -0.1673046 | 0.86713037 | 0.94870504 |
| Ddit4l      | 939.982477 | -0.0383465 | 0.26766036 | -0.1432657 | 0.88608036 | 0.95644032 |
| Srsf1       | 49131.6963 | -0.0383828 | 0.18522892 | -0.2072182 | 0.83583949 | 0.93687039 |
| Dnajc18     | 1649.85514 | -0.038409  | 0.15558272 | -0.2468716 | 0.80500756 | 0.92429656 |
| Nmur1       | 1.72937988 | -0.0384197 | 0.2666062  | -0.1441065 | 0.8854164  | NA         |
| Mrps33      | 582.808476 | -0.0384413 | 0.21667624 | -0.1774137 | 0.85918347 | 0.9455234  |
| Tuba1b      | 11408.7025 | -0.0385354 | 0.21236217 | -0.1814608 | 0.85600593 | 0.9447654  |
| Ccnk        | 4180.96112 | -0.0385687 | 0.17847049 | -0.2161067 | 0.82890461 | 0.93279511 |
| Ubald2      | 6.75639534 | -0.0385958 | 0.41835833 | -0.0922553 | 0.9264952  | 0.97229279 |
| Tmub1       | 317.08242  | -0.0386193 | 0.22556989 | -0.1712079 | 0.86406032 | 0.94713484 |
| Polr3b      | 7327.70179 | -0.0386482 | 0.1736054  | -0.222621  | 0.82383052 | 0.93107393 |
| Ndufb7      | 5353.44518 | -0.0386522 | 0.23959736 | -0.1613216 | 0.87184012 | 0.95103716 |
| Muc6        | 0.81918451 | -0.0386951 | 0.18079283 | -0.2140299 | 0.83052371 | NA         |
| Cstad       | 1.96654704 | -0.0387812 | 0.34033457 | -0.1139501 | 0.90927733 | NA         |
| Fam103a1    | 1268.58406 | -0.0388897 | 0.21494025 | -0.1809328 | 0.85642036 | 0.9448845  |
| Grhl3       | 1785.34743 | -0.0389189 | 0.22008542 | -0.1768355 | 0.85963757 | 0.9455234  |
| 3110070M22  | 4.92912672 | -0.0389463 | 0.36345742 | -0.1071551 | 0.91466595 | NA         |
| A230056J06R | 5.25862262 | -0.0389616 | 0.40536709 | -0.0961144 | 0.92342972 | NA         |
| Dcun1d2     | 981.172092 | -0.0389876 | 0.21252488 | -0.1834497 | 0.85444521 | 0.94447447 |
| BC049730    | 0.87517076 | -0.0390059 | 0.19508947 | -0.1999383 | 0.84152882 | NA         |
| Krt36       | 0.87517076 | -0.0390059 | 0.19508947 | -0.1999383 | 0.84152882 | NA         |
| Bbs4        | 1421.88783 | -0.0391326 | 0.17562327 | -0.2228213 | 0.82367457 | 0.93107393 |
| Rbm4b       | 323.53853  | -0.0391696 | 0.2050182  | -0.1910541 | 0.84848317 | 0.94207924 |
| Mir1983     | 2.00117812 | -0.039193  | 0.33631537 | -0.1165366 | 0.9072273  | NA         |
| Sap30l      | 1763.70862 | -0.039203  | 0.27928259 | -0.1403703 | 0.88836741 | 0.95731423 |
| Ptn         | 3.42107073 | -0.0393763 | 0.30397688 | -0.1295371 | 0.8969327  | NA         |
| Tmem206     | 602.047879 | -0.0393913 | 0.25713227 | -0.1531947 | 0.8782447  | 0.95329223 |
| Snord1b     | 35.4702252 | -0.0394361 | 0.40607175 | -0.0971161 | 0.92263417 | 0.97076346 |
| Dvl1        | 2624.84898 | -0.0395238 | 0.18004783 | -0.2195186 | 0.82624613 | 0.93166673 |
| Lsm11       | 1112.64738 | -0.0395465 | 0.17550872 | -0.225325  | 0.82172645 | 0.93076517 |
| Tigd3       | 184.501754 | -0.0395733 | 0.28561255 | -0.138556  | 0.88980099 | 0.9580332  |

|             |            |            |            |            |            |            |
|-------------|------------|------------|------------|------------|------------|------------|
| Samd4b      | 4711.73286 | -0.0396387 | 0.21374245 | -0.1854506 | 0.85287565 | 0.94423839 |
| Dennd3      | 595.763307 | -0.039647  | 0.21801443 | -0.1818551 | 0.85569641 | 0.94458789 |
| Zfp790      | 888.046748 | -0.0396569 | 0.20623995 | -0.1922853 | 0.84751875 | 0.94147896 |
| Arnt2       | 274.772352 | -0.0396606 | 0.27487559 | -0.1442858 | 0.88527482 | 0.95578308 |
| Knop1       | 14174.2007 | -0.0397257 | 0.18344496 | -0.2165538 | 0.82855613 | 0.93256314 |
| Myh2        | 0.47351958 | -0.0397548 | 0.1747357  | -0.227514  | 0.8200241  | NA         |
| 1700010I02R | 0.47351958 | -0.0397548 | 0.1747357  | -0.227514  | 0.8200241  | NA         |
| Klk1b24     | 0.47351958 | -0.0397548 | 0.1747357  | -0.227514  | 0.8200241  | NA         |
| Scgb1b3     | 0.47351958 | -0.0397548 | 0.1747357  | -0.227514  | 0.8200241  | NA         |
| 4930455D15I | 0.47351958 | -0.0397548 | 0.1747357  | -0.227514  | 0.8200241  | NA         |
| Hpd         | 0.47351958 | -0.0397548 | 0.1747357  | -0.227514  | 0.8200241  | NA         |
| Gm5088      | 0.47351958 | -0.0397548 | 0.1747357  | -0.227514  | 0.8200241  | NA         |
| Chil3       | 0.47351958 | -0.0397548 | 0.1747357  | -0.227514  | 0.8200241  | NA         |
| 4933432I03R | 0.47351958 | -0.0397548 | 0.1747357  | -0.227514  | 0.8200241  | NA         |
| 1700055N04I | 0.47351958 | -0.0397548 | 0.1747357  | -0.227514  | 0.8200241  | NA         |
| Krtap10-10  | 0.47351958 | -0.0397548 | 0.1747357  | -0.227514  | 0.8200241  | NA         |
| Spink13     | 0.47351958 | -0.0397548 | 0.1747357  | -0.227514  | 0.8200241  | NA         |
| Gm14204     | 0.47351958 | -0.0397548 | 0.1747357  | -0.227514  | 0.8200241  | NA         |
| Tm9sf3      | 11764.0648 | -0.0397963 | 0.16900516 | -0.2354741 | 0.81384081 | 0.92878688 |
| Dtl         | 10236.5444 | -0.0398702 | 0.18642594 | -0.2138661 | 0.83065146 | 0.9337556  |
| Gm527       | 236.881963 | -0.0398782 | 0.2629341  | -0.1516663 | 0.87945016 | 0.95385748 |
| Tnfsf13b    | 4.6194269  | -0.0399944 | 0.37362375 | -0.1070446 | 0.9147536  | NA         |
| Traf5       | 51.183097  | -0.0400793 | 0.36044243 | -0.1111947 | 0.91146198 | 0.96639703 |
| Crot        | 4649.5274  | -0.0401291 | 0.1718931  | -0.233454  | 0.81540888 | 0.92939072 |
| Tor1a       | 2468.79182 | -0.0401947 | 0.1966086  | -0.2044401 | 0.83800961 | 0.93761332 |
| Fer1l5      | 1.46488423 | -0.0403239 | 0.25404031 | -0.1587303 | 0.87388138 | NA         |
| Slc37a4     | 540.844772 | -0.0403876 | 0.26668205 | -0.1514449 | 0.87962476 | 0.95385748 |
| Rhou        | 883.76437  | -0.0405122 | 0.19362826 | -0.2092269 | 0.83427108 | 0.93598943 |
| Zfp446      | 1027.94948 | -0.0405264 | 0.21640738 | -0.1872691 | 0.85144966 | 0.94362127 |
| Tbck        | 752.869479 | -0.0405735 | 0.24659122 | -0.1645373 | 0.86930815 | 0.94941665 |
| Frg1        | 5162.3529  | -0.04058   | 0.21891127 | -0.1853719 | 0.85293733 | 0.94423839 |
| Npl         | 1689.27128 | -0.0406366 | 0.31946498 | -0.1272019 | 0.89878057 | 0.96168428 |
| Aplp2       | 27715.2199 | -0.0406431 | 0.15611881 | -0.2603347 | 0.79460559 | 0.91975523 |
| Vamp3       | 4470.76227 | -0.0406626 | 0.17855947 | -0.227726  | 0.81985923 | 0.93051161 |
| Purb        | 7187.65255 | -0.0407316 | 0.21923886 | -0.1857864 | 0.8526123  | 0.94417652 |
| C4bp        | 1.37627774 | -0.0407471 | 0.18690086 | -0.2180146 | 0.82741773 | NA         |
| Setmar      | 360.159507 | -0.0408343 | 0.21929039 | -0.1862111 | 0.85227923 | 0.94400244 |
| Eif2b1      | 5204.50528 | -0.0408483 | 0.17655699 | -0.2313606 | 0.81703469 | 0.93016422 |
| Spsb3       | 1151.32279 | -0.0409228 | 0.21871563 | -0.1871051 | 0.85157825 | 0.94369652 |
| Atg9a       | 923.079824 | -0.0410017 | 0.22427695 | -0.1828171 | 0.85494156 | 0.94458789 |
| Per1        | 1176.62333 | -0.0410489 | 0.24537194 | -0.1672924 | 0.86713995 | 0.94870504 |

|             |            |            |            |            |            |            |
|-------------|------------|------------|------------|------------|------------|------------|
| Gm14379     | 1.3858253  | -0.0410958 | 0.25205139 | -0.1630453 | 0.87048276 | NA         |
| Parp6       | 836.201907 | -0.0411479 | 0.19319189 | -0.2129895 | 0.83133512 | 0.93397576 |
| Smad9       | 358.818231 | -0.0413018 | 0.36933344 | -0.1118281 | 0.91095974 | 0.96617289 |
| Sbds        | 5101.29474 | -0.0413558 | 0.15878571 | -0.2604506 | 0.79451622 | 0.91975523 |
| Dmwd        | 3026.37434 | -0.0413992 | 0.19119807 | -0.216525  | 0.82857854 | 0.93256314 |
| Tdgf1       | 59797.1654 | -0.0414123 | 0.26822092 | -0.1543961 | 0.87729743 | 0.95317909 |
| Raver1      | 3575.17185 | -0.0414865 | 0.19715244 | -0.2104283 | 0.83333337 | 0.93527477 |
| Grb2        | 7031.51127 | -0.0414992 | 0.19748761 | -0.2101356 | 0.83356183 | 0.93545802 |
| Scaf8       | 6023.93963 | -0.0415226 | 0.21049314 | -0.1972632 | 0.84362157 | 0.94081023 |
| Ii15        | 6.79902675 | -0.041547  | 0.40334551 | -0.103006  | 0.91795819 | 0.96891454 |
| Sirt1       | 7087.54492 | -0.0416668 | 0.22562277 | -0.1846745 | 0.85348436 | 0.94431772 |
| Mir23a      | 0.46636384 | -0.0417461 | 0.17455831 | -0.2391528 | 0.8109871  | NA         |
| Mir205      | 0.46636384 | -0.0417461 | 0.17455831 | -0.2391528 | 0.8109871  | NA         |
| Speer4a     | 0.46636384 | -0.0417461 | 0.17455831 | -0.2391528 | 0.8109871  | NA         |
| Mir3097     | 0.46636384 | -0.0417461 | 0.17455831 | -0.2391528 | 0.8109871  | NA         |
| Rbm28       | 9613.01912 | -0.0419284 | 0.16338831 | -0.2566181 | 0.79747362 | 0.9212691  |
| Znrf3       | 1283.88767 | -0.0419549 | 0.27688763 | -0.1515231 | 0.87956307 | 0.95385748 |
| Mss51       | 74.3477309 | -0.0420688 | 0.36407122 | -0.1155511 | 0.9080083  | 0.96495598 |
| Taar2       | 0.89725202 | -0.0421756 | 0.19634264 | -0.2148059 | 0.82991865 | NA         |
| Fgf20       | 0.89725202 | -0.0421756 | 0.19634264 | -0.2148059 | 0.82991865 | NA         |
| Gtf2i       | 10172.4579 | -0.0422527 | 0.22329422 | -0.1892244 | 0.84991696 | 0.94277489 |
| Irf1        | 2640.57176 | -0.042321  | 0.21632352 | -0.1956375 | 0.84489389 | 0.94132069 |
| Peak1       | 2667.65425 | -0.0423736 | 0.19597531 | -0.216219  | 0.82881701 | 0.93276402 |
| Cfl2        | 5352.03089 | -0.042384  | 0.25097656 | -0.1688762 | 0.86589406 | 0.94814241 |
| Maged1      | 14474.4102 | -0.0424071 | 0.18166255 | -0.2334388 | 0.81542068 | 0.92939072 |
| Gzmc        | 2.10706357 | -0.0424949 | 0.30889422 | -0.1375712 | 0.89057933 | NA         |
| Gpr155      | 52.2100385 | -0.042545  | 0.37320644 | -0.1139986 | 0.90923892 | 0.96535634 |
| Bsg         | 27632.0789 | -0.0426001 | 0.21997471 | -0.1936592 | 0.84644271 | 0.94147896 |
| 1110038B12F | 4908.41244 | -0.0426498 | 0.1866115  | -0.2285485 | 0.81921988 | 0.93036217 |
| Tmem205     | 945.100403 | -0.0426569 | 0.30800389 | -0.1384948 | 0.8898494  | 0.9580332  |
| Exoc7       | 1948.82374 | -0.0426592 | 0.15820878 | -0.2696385 | 0.7874384  | 0.91657594 |
| Slc36a4     | 37.2091443 | -0.042721  | 0.40276023 | -0.1060706 | 0.91552637 | 0.96836839 |
| Dedd        | 2082.8739  | -0.0428284 | 0.15066737 | -0.2842581 | 0.77621257 | 0.91080372 |
| Churc1      | 1470.6427  | -0.0429223 | 0.20129322 | -0.2132325 | 0.83114563 | 0.93389781 |
| Mlst8       | 2199.74185 | -0.0429235 | 0.1716005  | -0.250136  | 0.80248221 | 0.92349559 |
| Tmem154     | 6.21436477 | -0.0429241 | 0.41152521 | -0.1043049 | 0.91692736 | 0.96879329 |
| Nhlh2       | 0.8072774  | -0.0430046 | 0.21987902 | -0.1955829 | 0.84493662 | NA         |
| Pdpk1       | 7604.24083 | -0.0430466 | 0.23633482 | -0.1821424 | 0.85547097 | 0.94458789 |
| Asrgl1      | 2204.5892  | -0.0430625 | 0.20461321 | -0.2104582 | 0.83331004 | 0.93527477 |
| Leo1        | 4603.59659 | -0.0430928 | 0.19846662 | -0.2171289 | 0.82810787 | 0.93250504 |
| Rad51ap2    | 2.42314281 | -0.0430958 | 0.33275242 | -0.1295131 | 0.8969517  | NA         |

|             |            |            |            |            |            |            |
|-------------|------------|------------|------------|------------|------------|------------|
| 4930544D05I | 0.49560083 | -0.0431468 | 0.17523914 | -0.2462164 | 0.80551472 | NA         |
| Il1f9       | 0.49560083 | -0.0431468 | 0.17523914 | -0.2462164 | 0.80551472 | NA         |
| Gm15114     | 0.49560083 | -0.0431468 | 0.17523914 | -0.2462164 | 0.80551472 | NA         |
| Defb7       | 0.49560083 | -0.0431468 | 0.17523914 | -0.2462164 | 0.80551472 | NA         |
| Slain1os    | 0.49560083 | -0.0431468 | 0.17523914 | -0.2462164 | 0.80551472 | NA         |
| Foxp2       | 0.49560083 | -0.0431468 | 0.17523914 | -0.2462164 | 0.80551472 | NA         |
| Ipo11       | 12318.6246 | -0.0432591 | 0.21755762 | -0.1988396 | 0.84238826 | 0.94000676 |
| Acsf2       | 5910.8234  | -0.0433371 | 0.19951672 | -0.2172104 | 0.82804439 | 0.93250504 |
| Kctd16      | 1.79776269 | -0.0433689 | 0.27291006 | -0.1589128 | 0.8737376  | NA         |
| Wdr41       | 1519.41926 | -0.0434054 | 0.19252939 | -0.2254482 | 0.82163062 | 0.93076517 |
| Nobox       | 8.62998415 | -0.0434246 | 0.43116159 | -0.1007153 | 0.9197765  | 0.96959357 |
| Slc30a5     | 4421.71768 | -0.0435271 | 0.15591316 | -0.279175  | 0.78011051 | 0.91303519 |
| Pcgf6       | 6130.11623 | -0.0436305 | 0.1810154  | -0.2410321 | 0.80953023 | 0.92748171 |
| Snora64     | 133.387737 | -0.0436955 | 0.34206211 | -0.1277414 | 0.89835359 | 0.96162064 |
| Fam188a     | 3063.50032 | -0.0437287 | 0.18426569 | -0.2373134 | 0.81241369 | 0.92872256 |
| Arhgdib     | 87.6817473 | -0.043735  | 0.43171597 | -0.1013051 | 0.91930831 | 0.96953982 |
| Pygm        | 375.095746 | -0.0437379 | 0.29495318 | -0.1482877 | 0.88211569 | 0.95521071 |
| Cdkn2b      | 312.05782  | -0.0437635 | 0.27686205 | -0.1580698 | 0.87440184 | 0.95209515 |
| Tsta3       | 2909.9606  | -0.0438546 | 0.18676354 | -0.2348137 | 0.81435336 | 0.92878688 |
| Ep300       | 6798.86625 | -0.0438758 | 0.26596476 | -0.1649685 | 0.86896876 | 0.9493616  |
| Ppih        | 3438.79583 | -0.0439927 | 0.18196396 | -0.241766  | 0.80896149 | 0.92698845 |
| Dennd1c     | 204.064843 | -0.044002  | 0.33930445 | -0.1296829 | 0.89681735 | 0.96132877 |
| Pde10a      | 72.6700341 | -0.0440168 | 0.41690548 | -0.1055797 | 0.9159158  | 0.9684122  |
| Zmynd19     | 4353.36921 | -0.0441454 | 0.15723791 | -0.2807557 | 0.77889781 | 0.9124802  |
| Trappc2     | 459.120372 | -0.0442585 | 0.21502531 | -0.2058291 | 0.83692441 | 0.93707333 |
| Spc25       | 6435.04924 | -0.0442873 | 0.22454955 | -0.1972271 | 0.84364984 | 0.94081023 |
| Ggcx        | 946.932203 | -0.0442944 | 0.17013004 | -0.2603559 | 0.79458929 | 0.91975523 |
| 4933427G17I | 2.9678205  | -0.0444172 | 0.36381319 | -0.1220879 | 0.90282938 | NA         |
| Mir6915     | 0.87716906 | -0.0445609 | 0.18130527 | -0.2457784 | 0.80585379 | NA         |
| Chmp3       | 7940.58294 | -0.044561  | 0.16098959 | -0.2767942 | 0.78193813 | 0.91366142 |
| Stxbp1      | 1025.75812 | -0.0446614 | 0.25460316 | -0.1754156 | 0.86075309 | 0.94567701 |
| Hnrnph1     | 36235.1202 | -0.0446766 | 0.16433202 | -0.271868  | 0.78572353 | 0.91560784 |
| Trim37      | 10696.2551 | -0.0446774 | 0.18577922 | -0.2404865 | 0.80995314 | 0.92748171 |
| Bckdk       | 3842.95712 | -0.0446898 | 0.18602973 | -0.2402292 | 0.81015257 | 0.9275573  |
| Npas3       | 4.69501569 | -0.0447306 | 0.38752782 | -0.1154256 | 0.90810779 | NA         |
| Mir367      | 0.88294053 | -0.0447356 | 0.1956568  | -0.2286431 | 0.81914633 | NA         |
| Cant1       | 2034.19254 | -0.0447545 | 0.16790071 | -0.2665534 | 0.78981302 | 0.91796579 |
| Gm15708     | 6.1214899  | -0.0448096 | 0.40642685 | -0.1102525 | 0.91220915 | 0.96685963 |
| 2-Mar       | 11305.8391 | -0.0448106 | 0.27770127 | -0.1613625 | 0.87180792 | 0.95103716 |
| Trio        | 1401.01159 | -0.044906  | 0.29509184 | -0.1521763 | 0.87904791 | 0.95374828 |
| Bax         | 13345.9708 | -0.045005  | 0.1915128  | -0.2349976 | 0.81421063 | 0.92878688 |



|             |            |            |            |            |            |            |
|-------------|------------|------------|------------|------------|------------|------------|
| Fxyd3       | 14.2736261 | -0.0450629 | 0.42589719 | -0.1058071 | 0.9157354  | 0.96836839 |
| Edem2       | 2219.31544 | -0.0451582 | 0.18333797 | -0.2463111 | 0.80544141 | 0.9245899  |
| 1700029M20  | 23.3832424 | -0.0451855 | 0.42646584 | -0.1059534 | 0.91561934 | 0.96836839 |
| Cab39       | 9946.50749 | -0.0452014 | 0.15478263 | -0.2920317 | 0.77026237 | 0.90826254 |
| Sqstm1      | 14016.2144 | -0.0452169 | 0.19947599 | -0.2266782 | 0.82067399 | 0.930536   |
| Chga        | 987.476129 | -0.0452325 | 0.26660771 | -0.1696593 | 0.86527807 | 0.94793514 |
| Zfp647      | 288.932523 | -0.0453233 | 0.24658404 | -0.1838047 | 0.85416667 | 0.94431772 |
| Cox15       | 3654.50342 | -0.045339  | 0.19986243 | -0.2268508 | 0.82053976 | 0.930536   |
| Ndufs3      | 3231.42602 | -0.0453852 | 0.17795132 | -0.255043  | 0.79868989 | 0.92171351 |
| Shisa2      | 508.501087 | -0.0453925 | 0.37684226 | -0.120455  | 0.90412275 | 0.96369802 |
| Tfpi2       | 0.45381401 | -0.0454019 | 0.1742317  | -0.2605837 | 0.79441354 | NA         |
| 1700036G14I | 0.45381401 | -0.0454019 | 0.1742317  | -0.2605837 | 0.79441354 | NA         |
| 1700025F24F | 0.45381401 | -0.0454019 | 0.1742317  | -0.2605837 | 0.79441354 | NA         |
| lfltd1      | 0.45381401 | -0.0454019 | 0.1742317  | -0.2605837 | 0.79441354 | NA         |
| B3glct      | 2485.58317 | -0.0454338 | 0.3591422  | -0.1265064 | 0.89933105 | 0.96194986 |
| Plekha7     | 5183.46799 | -0.045442  | 0.22119922 | -0.2054347 | 0.8372325  | 0.93732437 |
| Bai1        | 429.477196 | -0.045468  | 0.29578867 | -0.153718  | 0.8778321  | 0.95329223 |
| Echdc3      | 13.2032438 | -0.0455832 | 0.43227036 | -0.1054506 | 0.91601827 | 0.96842504 |
| Ubac1       | 5116.16021 | -0.0456242 | 0.18179854 | -0.2509603 | 0.80184483 | 0.92325551 |
| Nrxn3       | 0.51492902 | -0.0458758 | 0.17564204 | -0.2611894 | 0.79394648 | NA         |
| Gm5860      | 0.51492902 | -0.0458758 | 0.17564204 | -0.2611894 | 0.79394648 | NA         |
| Mir3569     | 0.51492902 | -0.0458758 | 0.17564204 | -0.2611894 | 0.79394648 | NA         |
| Ugt1a7c     | 0.51492902 | -0.0458758 | 0.17564204 | -0.2611894 | 0.79394648 | NA         |
| Pla2g4d     | 5.9319931  | -0.0459206 | 0.38673791 | -0.1187383 | 0.9054827  | 0.96404417 |
| Zc3h12a     | 466.7644   | -0.0459413 | 0.25713621 | -0.1786653 | 0.85820048 | 0.9455234  |
| Hsp90aa1    | 284240.824 | -0.0460521 | 0.15116753 | -0.3046425 | 0.76063841 | 0.90435844 |
| Strn3       | 7417.69819 | -0.0460745 | 0.1788709  | -0.2575851 | 0.7967271  | 0.92070321 |
| Slc35f6     | 1793.82493 | -0.0460769 | 0.18308758 | -0.2516658 | 0.80129936 | 0.92325551 |
| Gm14325     | 2797.67405 | -0.0461244 | 0.17529178 | -0.2631294 | 0.79245087 | 0.918989   |
| Smn1        | 3633.22724 | -0.0462171 | 0.19571586 | -0.236144  | 0.81332094 | 0.92878688 |
| H2afv       | 5640.31077 | -0.0463505 | 0.19165647 | -0.2418413 | 0.80890313 | 0.92698845 |
| Mir92-2     | 4.8976261  | -0.0463618 | 0.40059457 | -0.1157325 | 0.90786458 | NA         |
| 4930456L15F | 0.51768209 | -0.0463792 | 0.17571617 | -0.2639438 | 0.79182326 | NA         |
| Rnase11     | 0.51768209 | -0.0463792 | 0.17571617 | -0.2639438 | 0.79182326 | NA         |
| Gm19557     | 0.51768209 | -0.0463792 | 0.17571617 | -0.2639438 | 0.79182326 | NA         |
| Rpl26       | 0.51768209 | -0.0463792 | 0.17571617 | -0.2639438 | 0.79182326 | NA         |
| F830002L21R | 0.51768209 | -0.0463792 | 0.17571617 | -0.2639438 | 0.79182326 | NA         |
| Cadm1       | 5572.12582 | -0.0464225 | 0.15962155 | -0.2908283 | 0.77118267 | 0.90875167 |
| Tex9        | 2491.00999 | -0.04643   | 0.18475238 | -0.2513091 | 0.80157511 | 0.92325551 |
| Tmem230     | 2168.67213 | -0.0465096 | 0.20922726 | -0.222292  | 0.82408655 | 0.93107393 |
| Sec11c      | 859.63815  | -0.0466409 | 0.19446845 | -0.2398377 | 0.81045605 | 0.9275573  |

|             |            |            |            |            |            |            |
|-------------|------------|------------|------------|------------|------------|------------|
| 3110040N11  | 917.425357 | -0.0466436 | 0.21658887 | -0.2153556 | 0.82949007 | 0.93318383 |
| Pole3       | 2046.35645 | -0.0466629 | 0.17362281 | -0.2687604 | 0.7881141  | 0.91705183 |
| Ptpn5       | 1.53098115 | -0.0467203 | 0.22674981 | -0.2060432 | 0.83675716 | NA         |
| Vps26a      | 11644.3259 | -0.0467289 | 0.14905163 | -0.3135084 | 0.75389442 | 0.90191816 |
| Cox8a       | 15887.964  | -0.0467621 | 0.23526228 | -0.198766  | 0.84244577 | 0.94000676 |
| Diexf       | 2267.68793 | -0.0467699 | 0.19422128 | -0.2408075 | 0.80970432 | 0.92748171 |
| Rab11b      | 2339.39657 | -0.0467803 | 0.18341725 | -0.2550487 | 0.79868547 | 0.92171351 |
| Ddx51       | 2552.70201 | -0.0468928 | 0.22754421 | -0.2060821 | 0.83672677 | 0.93698697 |
| Map2k6      | 2232.7494  | -0.0470077 | 0.18658815 | -0.2519327 | 0.80109306 | 0.92325551 |
| Eif4e3      | 20.5515573 | -0.047018  | 0.43006162 | -0.1093286 | 0.91294185 | 0.96727157 |
| Ggnbp2      | 8945.80221 | -0.0471056 | 0.16126883 | -0.2920936 | 0.77021507 | 0.90826254 |
| Chdh        | 7.06704889 | -0.0473194 | 0.39822377 | -0.1188261 | 0.90541316 | 0.96404417 |
| Dpysl2      | 742.115336 | -0.0474396 | 0.27876747 | -0.1701761 | 0.86487163 | 0.94756625 |
| Cmtm6       | 8248.04871 | -0.0474924 | 0.14916061 | -0.3183978 | 0.7501832  | 0.90092664 |
| Pak1ip1     | 9428.93018 | -0.0475017 | 0.1590002  | -0.2987525 | 0.76512887 | 0.90610594 |
| Shcbp1l     | 80.3978366 | -0.0475431 | 0.39404076 | -0.1206554 | 0.90396398 | 0.96364421 |
| Rnft1       | 2940.26148 | -0.0475587 | 0.16713699 | -0.2845493 | 0.77598946 | 0.91074808 |
| Xrcc2       | 1974.27769 | -0.0476029 | 0.20667729 | -0.230325  | 0.81783927 | 0.93032    |
| Opn1sw      | 0.78757183 | -0.0476204 | 0.21880277 | -0.2176406 | 0.82770916 | NA         |
| Zfp771      | 571.105971 | -0.0476307 | 0.23721718 | -0.2007893 | 0.84086336 | 0.93940315 |
| Tm9sf4      | 6091.71037 | -0.0477109 | 0.19968983 | -0.2389253 | 0.81116354 | 0.92788711 |
| Flcn        | 3715.75921 | -0.0477829 | 0.19036902 | -0.2510014 | 0.80181302 | 0.92325551 |
| Cd300c      | 4.54251311 | -0.0478291 | 0.39202943 | -0.1220039 | 0.90289589 | NA         |
| CK137956    | 0.50777328 | -0.0478299 | 0.17548035 | -0.2725658 | 0.78518701 | NA         |
| Lmbr1l      | 1307.71484 | -0.0478435 | 0.16757053 | -0.2855125 | 0.77525155 | 0.91029675 |
| C1ql4       | 11.3535101 | -0.047972  | 0.42297626 | -0.1134153 | 0.90970134 | 0.96564042 |
| Smarcd3     | 1218.22051 | -0.0479911 | 0.20492487 | -0.2341885 | 0.81483864 | 0.92906779 |
| Slc24a2     | 2.41221389 | -0.0480956 | 0.29014038 | -0.1657666 | 0.86834066 | NA         |
| Mesp1       | 4.19895853 | -0.0481233 | 0.38642374 | -0.1245349 | 0.90089174 | NA         |
| Dact1       | 285.352862 | -0.0482183 | 0.36314973 | -0.1327781 | 0.89436885 | 0.96024637 |
| Hist1h4a    | 7.32409645 | -0.0482473 | 0.41636048 | -0.1158788 | 0.90774861 | 0.96495598 |
| Lenep       | 112.529214 | -0.0482613 | 0.29174661 | -0.165422  | 0.86861187 | 0.9493136  |
| Ctbp2       | 12470.4786 | -0.0482727 | 0.20836874 | -0.2316695 | 0.81679475 | 0.93007067 |
| 1700063D05I | 0.51052635 | -0.0483312 | 0.17555593 | -0.2753036 | 0.78308299 | NA         |
| Myl1        | 0.51052635 | -0.0483312 | 0.17555593 | -0.2753036 | 0.78308299 | NA         |
| Pdxk        | 7251.85892 | -0.0483511 | 0.1656893  | -0.291818  | 0.77042577 | 0.90826254 |
| Ddb2        | 1559.55749 | -0.0483826 | 0.22310187 | -0.2168634 | 0.82831479 | 0.93256314 |
| Zmat5       | 2584.70488 | -0.0483832 | 0.2063269  | -0.2344978 | 0.81459854 | 0.92896417 |
| Mettl16     | 5483.03358 | -0.0483913 | 0.18149771 | -0.266622  | 0.78976023 | 0.91796579 |
| Pak7        | 5.65714334 | -0.0484341 | 0.3982067  | -0.1216306 | 0.90319156 | NA         |
| Brwd3       | 2727.42782 | -0.0484777 | 0.24921218 | -0.194524  | 0.84576564 | 0.94147896 |

|             |            |            |            |            |            |            |
|-------------|------------|------------|------------|------------|------------|------------|
| Trpc4ap     | 6196.2681  | -0.0485257 | 0.17561831 | -0.2763135 | 0.78230728 | 0.91381112 |
| Nudc        | 15771.0451 | -0.0485329 | 0.20800323 | -0.2333274 | 0.81550719 | 0.92942121 |
| Smarcal1    | 3269.32932 | -0.0486553 | 0.18394101 | -0.2645156 | 0.79138264 | 0.91841727 |
| Psmb7       | 16376.4126 | -0.0486801 | 0.17430658 | -0.2792784 | 0.78003119 | 0.91301107 |
| Gm5294      | 0.47589526 | -0.0487356 | 0.17476041 | -0.2788712 | 0.78034367 | NA         |
| Dnph1       | 2281.03879 | -0.0487475 | 0.18668799 | -0.2611173 | 0.79400208 | 0.91975523 |
| Hmgn2       | 4486.54172 | -0.0487561 | 0.23048922 | -0.2115331 | 0.83247131 | 0.934847   |
| Acot13      | 1665.94172 | -0.0488263 | 0.312535   | -0.1562266 | 0.87585443 | 0.95264675 |
| Gas7        | 426.384605 | -0.0488973 | 0.37991117 | -0.1287073 | 0.89758926 | 0.96153958 |
| Parl        | 6397.19864 | -0.0489925 | 0.17057408 | -0.2872213 | 0.77394289 | 0.9099256  |
| Smarce1     | 3761.77174 | -0.0490056 | 0.16641804 | -0.2944729 | 0.76839659 | 0.90683277 |
| Paccin2     | 6452.82944 | -0.0490101 | 0.18752865 | -0.2613473 | 0.79382467 | 0.91974128 |
| 5830411N06I | 1.10877982 | -0.0490277 | 0.24229152 | -0.2023499 | 0.83964318 | NA         |
| N28178      | 1.10877982 | -0.0490277 | 0.24229152 | -0.2023499 | 0.83964318 | NA         |
| Mrpl51      | 3975.11435 | -0.04904   | 0.19693853 | -0.2490119 | 0.8033516  | 0.92355442 |
| Bik         | 78.6892849 | -0.0490676 | 0.41092246 | -0.1194083 | 0.90495189 | 0.96389773 |
| A730020M07  | 2.19390773 | -0.0490719 | 0.28429515 | -0.172609  | 0.86295881 | NA         |
| Cd163l1     | 12.0566515 | -0.0491063 | 0.42992687 | -0.1142201 | 0.90906335 | 0.96531171 |
| Ssna1       | 2626.2315  | -0.0491928 | 0.22938338 | -0.2144566 | 0.830191   | 0.93357834 |
| Mtg2        | 1455.62337 | -0.0491981 | 0.19735698 | -0.2492846 | 0.80314061 | 0.92352256 |
| Gm4788      | 1.43740889 | -0.0492455 | 0.2825252  | -0.174305  | 0.86162579 | NA         |
| Lman2       | 7655.01526 | -0.049263  | 0.18150577 | -0.2714127 | 0.78607364 | 0.9157961  |
| Enc1        | 4500.26038 | -0.0492911 | 0.28235416 | -0.1745718 | 0.86141614 | 0.94590329 |
| Slc34a2     | 1.87667477 | -0.0493059 | 0.26496718 | -0.186083  | 0.85237966 | NA         |
| Ddx59       | 1403.63587 | -0.0493801 | 0.20852212 | -0.2368097 | 0.81280442 | 0.92878688 |
| Olf976      | 1.74644444 | -0.0494794 | 0.30211642 | -0.1637758 | 0.86990765 | NA         |
| Rabac1      | 2463.25262 | -0.0495461 | 0.25753695 | -0.1923846 | 0.84744094 | 0.94147896 |
| Armc1       | 6334.47568 | -0.049648  | 0.16764272 | -0.2961534 | 0.76711295 | 0.90649963 |
| Rpsud2      | 1831.55443 | -0.0496527 | 0.21322478 | -0.2328656 | 0.81586579 | 0.92967334 |
| Ergic1      | 6613.27258 | -0.0496997 | 0.22062876 | -0.225264  | 0.8217739  | 0.93076517 |
| Anp32a      | 39501.0429 | -0.0497192 | 0.21834787 | -0.2277062 | 0.81987461 | 0.93051161 |
| Tnfrsf12a   | 477.875173 | -0.049721  | 0.30147623 | -0.1649251 | 0.86900291 | 0.9493616  |
| Hey1        | 185.793499 | -0.0497967 | 0.30650907 | -0.1624641 | 0.87094037 | 0.95032231 |
| Ergic3      | 4525.69545 | -0.0498029 | 0.1891614  | -0.2632827 | 0.79233272 | 0.918989   |
| Rem2        | 28.4034807 | -0.0499305 | 0.43226492 | -0.1155091 | 0.90804159 | 0.96495598 |
| Slk         | 7465.68126 | -0.049992  | 0.1908995  | -0.2618761 | 0.79341695 | 0.91954293 |
| Sec16b      | 9.37714732 | -0.0500057 | 0.41582533 | -0.1202564 | 0.90428003 | 0.96369802 |
| Myo1b       | 9523.40232 | -0.0500279 | 0.21849494 | -0.2289661 | 0.81889523 | 0.93036217 |
| Cyp2b10     | 1.03536418 | -0.0500443 | 0.18263265 | -0.274016  | 0.78407232 | NA         |
| Stard5      | 1091.19553 | -0.0500613 | 0.22221272 | -0.2252855 | 0.82175716 | 0.93076517 |
| Ache        | 1.13801682 | -0.0500853 | 0.2408102  | -0.2079867 | 0.83523938 | NA         |

|             |            |            |            |            |            |            |
|-------------|------------|------------|------------|------------|------------|------------|
| Mark2       | 4342.36651 | -0.0501477 | 0.22902143 | -0.218965  | 0.82667729 | 0.93181174 |
| Zcwpw1      | 1172.72039 | -0.0502012 | 0.31010768 | -0.1618831 | 0.87139787 | 0.95068811 |
| lkbkap      | 10345.7787 | -0.0502473 | 0.18725703 | -0.2683333 | 0.78844277 | 0.91719581 |
| Phactr3     | 35.2269423 | -0.0503468 | 0.40799982 | -0.123399  | 0.90179115 | 0.96270877 |
| Mrpl40      | 5368.27291 | -0.0503531 | 0.16304765 | -0.3088243 | 0.7574552  | 0.90301693 |
| Cdh9        | 3.88190043 | -0.0503542 | 0.33936287 | -0.1483787 | 0.88204391 | NA         |
| Kcnj6       | 1.82010927 | -0.0503618 | 0.30461204 | -0.1653309 | 0.8686835  | NA         |
| Ulk4        | 222.733873 | -0.0504211 | 0.27118418 | -0.1859294 | 0.8525001  | 0.94417652 |
| Rita1       | 699.079668 | -0.0504384 | 0.21967083 | -0.2296089 | 0.81839571 | 0.93032688 |
| Izumo2      | 43.4440282 | -0.0504915 | 0.39824781 | -0.1267842 | 0.89911121 | 0.96182696 |
| Zfp334      | 376.32306  | -0.050578  | 0.28274952 | -0.1788791 | 0.85803262 | 0.9455234  |
| Lzts3       | 561.925778 | -0.0506306 | 0.201567   | -0.2511847 | 0.80167129 | 0.92325551 |
| LOC10166976 | 174.708425 | -0.0506484 | 0.25792899 | -0.1963655 | 0.84432409 | 0.94115145 |
| Sim2        | 3.74689647 | -0.0507085 | 0.35439647 | -0.1430841 | 0.88622373 | NA         |
| Zfp637      | 479.251987 | -0.0507546 | 0.22212944 | -0.2284913 | 0.81926432 | 0.93036217 |
| Snrpd2      | 6876.31521 | -0.0507886 | 0.20927538 | -0.2426878 | 0.80824724 | 0.92664795 |
| Exosc1      | 3094.88826 | -0.0508138 | 0.14810445 | -0.3430944 | 0.73152744 | 0.89154993 |
| Rhd         | 222.74584  | -0.0508831 | 0.36150385 | -0.140754  | 0.8880643  | 0.95725292 |
| Emc7        | 2098.4869  | -0.0509152 | 0.16470624 | -0.3091271 | 0.75722484 | 0.90301693 |
| Gm9376      | 0.52985453 | -0.0509164 | 0.17594479 | -0.2893884 | 0.77228413 | NA         |
| Akr1e1      | 1056.47049 | -0.0509507 | 0.30678026 | -0.1660821 | 0.86809236 | 0.94921278 |
| Jade3       | 6912.75643 | -0.0509625 | 0.20290675 | -0.2511622 | 0.80168871 | 0.92325551 |
| Pcbp1       | 26774.0247 | -0.0510172 | 0.15980332 | -0.3192497 | 0.74953716 | 0.90084943 |
| Zbtb43      | 4548.22679 | -0.0511391 | 0.20076282 | -0.2547238 | 0.79893647 | 0.92171351 |
| Capg        | 1137.34711 | -0.0511498 | 0.38108488 | -0.1342216 | 0.89322736 | 0.95975807 |
| Npy4r       | 4.71605528 | -0.0513354 | 0.39023293 | -0.1315506 | 0.89533973 | NA         |
| Kcnc2       | 7.69419676 | -0.0513816 | 0.41559727 | -0.1236332 | 0.9016057  | 0.96270877 |
| Ldlrad4     | 148.259187 | -0.051391  | 0.31173498 | -0.1648549 | 0.86905822 | 0.9493616  |
| Wnt1        | 0.49522345 | -0.0514106 | 0.17518302 | -0.2934679 | 0.76916453 | NA         |
| Rbms2       | 6491.72458 | -0.0514201 | 0.18541417 | -0.2773258 | 0.78152995 | 0.91337854 |
| Hist1h2bf   | 0.55633846 | -0.0514864 | 0.17646487 | -0.2917656 | 0.77046585 | NA         |
| C130026L21F | 0.55633846 | -0.0514864 | 0.17646487 | -0.2917656 | 0.77046585 | NA         |
| Lcn4        | 0.55633846 | -0.0514864 | 0.17646487 | -0.2917656 | 0.77046585 | NA         |
| Fbxl12      | 1573.18001 | -0.0515328 | 0.20091507 | -0.2564903 | 0.79757224 | 0.9212691  |
| 1810062G17I | 1.20452591 | -0.0515505 | 0.24315429 | -0.2120072 | 0.83210142 | NA         |
| 4933405L10F | 16.4239243 | -0.0515633 | 0.43098097 | -0.1196416 | 0.90476706 | 0.96383289 |
| Ralgapa1    | 2843.39612 | -0.0518163 | 0.21532181 | -0.2406456 | 0.80982978 | 0.92748171 |
| lsm2        | 1092.48311 | -0.0518555 | 0.20891724 | -0.2482109 | 0.80397127 | 0.92388669 |
| Zbtb11      | 3359.33297 | -0.0518556 | 0.21877452 | -0.2370275 | 0.81263547 | 0.92878688 |
| Slc13a2     | 85.0523304 | -0.051879  | 0.37645833 | -0.137808  | 0.89039213 | 0.9584185  |
| Mir7662     | 0.49797652 | -0.0519085 | 0.17526131 | -0.296178  | 0.76709414 | NA         |

|             |            |            |            |            |            |            |
|-------------|------------|------------|------------|------------|------------|------------|
| Mir3070a    | 0.49797652 | -0.0519085 | 0.17526131 | -0.296178  | 0.76709414 | NA         |
| 4930556C24f | 0.49797652 | -0.0519085 | 0.17526131 | -0.296178  | 0.76709414 | NA         |
| Olf523      | 0.49797652 | -0.0519085 | 0.17526131 | -0.296178  | 0.76709414 | NA         |
| Snora47     | 0.49797652 | -0.0519085 | 0.17526131 | -0.296178  | 0.76709414 | NA         |
| 6530411M01  | 0.49797652 | -0.0519085 | 0.17526131 | -0.296178  | 0.76709414 | NA         |
| 1700026D11l | 0.49797652 | -0.0519085 | 0.17526131 | -0.296178  | 0.76709414 | NA         |
| Thoc1       | 5889.23917 | -0.0520623 | 0.18846424 | -0.2762448 | 0.78236006 | 0.91381112 |
| Commd5      | 1655.65201 | -0.0521013 | 0.20098677 | -0.2592276 | 0.79545966 | 0.92026433 |
| Bricd5      | 7.19670289 | -0.0521518 | 0.42074017 | -0.1239525 | 0.90135292 | 0.96269291 |
| Metap1      | 6412.16164 | -0.0521549 | 0.14419245 | -0.3617034 | 0.71757368 | 0.88521246 |
| Arfp2       | 2742.35827 | -0.0522599 | 0.19691428 | -0.2653941 | 0.79070591 | 0.91829081 |
| Pldi        | 0.8415311  | -0.0523332 | 0.22203794 | -0.2356951 | 0.81366931 | NA         |
| Ccl3        | 2.1489402  | -0.052355  | 0.27564223 | -0.1899384 | 0.84935743 | NA         |
| Gm4792      | 0.93988342 | -0.0523815 | 0.19792816 | -0.2646493 | 0.79127967 | NA         |
| Dapl1       | 1.02105269 | -0.0523956 | 0.18253491 | -0.2870441 | 0.77407854 | NA         |
| Sgk1        | 30180.4708 | -0.0524086 | 0.19266464 | -0.2720198 | 0.78560681 | 0.91560784 |
| Wipf1       | 427.029819 | -0.0524143 | 0.36072747 | -0.1453016 | 0.88447274 | 0.95575952 |
| lqca        | 604.417459 | -0.0525271 | 0.41966243 | -0.1251651 | 0.90039287 | 0.96260206 |
| Ttc30a1     | 677.608967 | -0.0525334 | 0.22809923 | -0.2303095 | 0.81785124 | 0.93032    |
| Ctr9        | 6394.62368 | -0.0525356 | 0.16717992 | -0.3142456 | 0.75333451 | 0.90191816 |
| Hspd1       | 65723.724  | -0.0525916 | 0.24109719 | -0.2181344 | 0.82732437 | 0.93199444 |
| Birc3       | 573.354799 | -0.0526419 | 0.27536438 | -0.1911719 | 0.84839095 | 0.94204411 |
| Nploc4      | 6565.40022 | -0.0526836 | 0.21041508 | -0.2503796 | 0.80229381 | 0.92349342 |
| Mboat1      | 93.9423349 | -0.0527243 | 0.31669772 | -0.1664816 | 0.86777795 | 0.94908142 |
| Rc3h2       | 2997.10293 | -0.0528223 | 0.22381853 | -0.2360052 | 0.81342866 | 0.92878688 |
| Pcgf2       | 3716.95227 | -0.0528364 | 0.15538197 | -0.340042  | 0.73382487 | 0.892514   |
| Xirp2       | 9.25516014 | -0.0528461 | 0.25803099 | -0.2048053 | 0.83772422 | 0.93751696 |
| Fam195a     | 488.750684 | -0.0529049 | 0.29573356 | -0.1788939 | 0.85802105 | 0.9455234  |
| Mtpn        | 10527.6931 | -0.0529127 | 0.19894887 | -0.2659611 | 0.79026914 | 0.91812832 |
| Ttc21a      | 68.1218922 | -0.0529415 | 0.38651969 | -0.1369698 | 0.8910547  | 0.95858894 |
| Snora21     | 27.1199506 | -0.0529885 | 0.42390079 | -0.1250021 | 0.90052188 | 0.9626738  |
| Ppp1r14b    | 4015.72406 | -0.0530075 | 0.19518275 | -0.2715789 | 0.78594583 | 0.91579114 |
| Fam179b     | 4047.95772 | -0.0530412 | 0.2460135  | -0.2156029 | 0.82929729 | 0.93304824 |
| Snhg7       | 935.010472 | -0.0530635 | 0.26857441 | -0.1975747 | 0.84337786 | 0.94064184 |
| Magea2      | 12.5251148 | -0.0530705 | 0.43108616 | -0.1231088 | 0.90202097 | 0.96270877 |
| Pum1        | 12850.2924 | -0.0531158 | 0.20549919 | -0.2584721 | 0.79604257 | 0.92059627 |
| Phf6        | 2371.16074 | -0.0531402 | 0.20696281 | -0.2567619 | 0.79736261 | 0.92123224 |
| Fam193b     | 4103.74981 | -0.0532282 | 0.20651918 | -0.2577395 | 0.79660793 | 0.92070321 |
| Ccdc107     | 1168.97755 | -0.05327   | 0.28187062 | -0.1889874 | 0.85010273 | 0.94280042 |
| Med17       | 6237.62628 | -0.053346  | 0.14514573 | -0.3675337 | 0.71322093 | 0.88405059 |
| Fam71e1     | 29.3248999 | -0.0533581 | 0.4304769  | -0.123951  | 0.90135405 | 0.96269291 |

|             |            |            |            |            |            |            |
|-------------|------------|------------|------------|------------|------------|------------|
| Mir191      | 0.54918271 | -0.0534031 | 0.17631735 | -0.3028805 | 0.76198091 | NA         |
| Mfsd7a      | 65.8084055 | -0.0534034 | 0.35227566 | -0.1515955 | 0.87950601 | 0.95385748 |
| Mir7003     | 4.55204453 | -0.0535428 | 0.39295317 | -0.1362575 | 0.8916177  | NA         |
| Cxcr4       | 96.8782885 | -0.0535469 | 0.32857595 | -0.1629667 | 0.87054465 | 0.9501572  |
| Nhej1       | 328.435176 | -0.0536363 | 0.21176436 | -0.2532828 | 0.8000497  | 0.92248631 |
| Snrpa1      | 8702.5743  | -0.0536543 | 0.19807057 | -0.2708847 | 0.78647971 | 0.91606931 |
| Agpat6      | 4368.23843 | -0.053679  | 0.24859373 | -0.2159305 | 0.82904193 | 0.93288213 |
| Slc25a38    | 1176.76225 | -0.0537288 | 0.23687389 | -0.2268246 | 0.82056013 | 0.930536   |
| Gm4944      | 582.583086 | -0.0537425 | 0.21658548 | -0.2481353 | 0.80402969 | 0.92388669 |
| Tmbim6      | 12884.4481 | -0.053775  | 0.18500731 | -0.2906642 | 0.77130816 | 0.90875167 |
| Kpna7       | 16.9381984 | -0.0537852 | 0.43155263 | -0.124632  | 0.90081493 | 0.96269291 |
| Ppm1d       | 2493.4584  | -0.0539612 | 0.19578696 | -0.2756117 | 0.78284632 | 0.91399508 |
| Nicn1       | 1357.10344 | -0.054043  | 0.23499491 | -0.2299752 | 0.81811102 | 0.93032296 |
| Ahdc1       | 4266.2941  | -0.0540591 | 0.24786811 | -0.2180963 | 0.82735407 | 0.93199444 |
| Ergic2      | 7392.71572 | -0.0541144 | 0.17156122 | -0.3154234 | 0.75244023 | 0.90182644 |
| Gm20594     | 0.86801502 | -0.0541257 | 0.22350786 | -0.2421648 | 0.80865243 | NA         |
| 6720483E21F | 41.4799089 | -0.0542263 | 0.42676594 | -0.1270632 | 0.89889037 | 0.96168428 |
| Tra2a       | 18872.6622 | -0.0543154 | 0.14845404 | -0.3658732 | 0.71445971 | 0.88425449 |
| Zbtb48      | 895.441862 | -0.0543733 | 0.20306791 | -0.2677594 | 0.78888453 | 0.91750381 |
| Zbtb7c      | 116.81068  | -0.0544108 | 0.4088343  | -0.1330876 | 0.89412407 | 0.96010139 |
| Tssk1       | 0.5173047  | -0.0544589 | 0.17566229 | -0.3100206 | 0.75654526 | NA         |
| 1700006H21I | 0.5173047  | -0.0544589 | 0.17566229 | -0.3100206 | 0.75654526 | NA         |
| Mir7004     | 0.5173047  | -0.0544589 | 0.17566229 | -0.3100206 | 0.75654526 | NA         |
| Spata19     | 0.5173047  | -0.0544589 | 0.17566229 | -0.3100206 | 0.75654526 | NA         |
| Rnu12       | 0.5173047  | -0.0544589 | 0.17566229 | -0.3100206 | 0.75654526 | NA         |
| Gm8363      | 0.5173047  | -0.0544589 | 0.17566229 | -0.3100206 | 0.75654526 | NA         |
| Plcb4       | 1881.35834 | -0.0546164 | 0.25743083 | -0.2121595 | 0.83198259 | 0.93450064 |
| Ggps1       | 1963.15947 | -0.0546524 | 0.17488929 | -0.3124971 | 0.75466279 | 0.90191816 |
| Fuz         | 570.268142 | -0.0547347 | 0.23243777 | -0.2354812 | 0.81383529 | 0.92878688 |
| Slc51b      | 0.87076809 | -0.054745  | 0.22365891 | -0.2447701 | 0.80663445 | NA         |
| Prrg4       | 1328.15552 | -0.0547667 | 0.312558   | -0.175221  | 0.86090601 | 0.94567701 |
| Mir8103     | 1.42761213 | -0.054924  | 0.28711056 | -0.1912993 | 0.84829111 | NA         |
| Ctss        | 9.6934474  | -0.0549401 | 0.41960747 | -0.1309321 | 0.89582906 | 0.96083244 |
| Cnot10      | 10348.0883 | -0.0549516 | 0.18340335 | -0.2996218 | 0.76446565 | 0.90596301 |
| Dennd1b     | 2646.3188  | -0.0549733 | 0.23229919 | -0.2366487 | 0.81292931 | 0.92878688 |
| Hemt1       | 4.04403101 | -0.0550252 | 0.38308009 | -0.1436389 | 0.88578563 | NA         |
| 1810021B22F | 2.09512777 | -0.0550277 | 0.31448588 | -0.1749766 | 0.86109805 | NA         |
| Foxp3       | 3.31275934 | -0.0551094 | 0.38357983 | -0.1436713 | 0.88576003 | NA         |
| Ftcd        | 3.02841128 | -0.0552327 | 0.33403485 | -0.1653501 | 0.86866844 | NA         |
| Cdc34       | 13467.2148 | -0.0552474 | 0.21614978 | -0.2555976 | 0.79826156 | 0.92164102 |
| Dnajc13     | 11245.1542 | -0.0552506 | 0.26513922 | -0.2083833 | 0.83492966 | 0.93631091 |

|             |            |            |            |            |            |            |
|-------------|------------|------------|------------|------------|------------|------------|
| Nat9        | 680.84229  | -0.0552984 | 0.30798423 | -0.1795494 | 0.85750633 | 0.94538792 |
| Snapin      | 3319.33267 | -0.0553063 | 0.20937227 | -0.2641531 | 0.79166198 | 0.91860434 |
| Cd47        | 516.104849 | -0.0554111 | 0.2442551  | -0.2268576 | 0.82053446 | 0.930536   |
| Ccdc50      | 4707.26486 | -0.0554193 | 0.19270593 | -0.287585  | 0.77366442 | 0.9098882  |
| Fads2       | 7446.6369  | -0.0554202 | 0.18019175 | -0.3075624 | 0.75841533 | 0.90307174 |
| Fam135b     | 2.64140413 | -0.0554302 | 0.2523793  | -0.2196305 | 0.82615896 | NA         |
| Nkx3-1      | 31.7085151 | -0.0554423 | 0.43090654 | -0.1286642 | 0.89762334 | 0.96153958 |
| Slc22a12    | 1.4523344  | -0.0555006 | 0.28426226 | -0.1952442 | 0.84520174 | NA         |
| Aurkc       | 2695.5178  | -0.0555263 | 0.4317485  | -0.1286081 | 0.89766778 | 0.96153958 |
| Gpr180      | 1512.82298 | -0.055613  | 0.18364419 | -0.3028301 | 0.76201934 | 0.9048709  |
| P4hb        | 47280.7108 | -0.0557436 | 0.15787992 | -0.3530759 | 0.72403154 | 0.88829071 |
| Myzap       | 39.2319367 | -0.0557582 | 0.36840898 | -0.1513488 | 0.8797006  | 0.95385748 |
| Fgf23       | 61.1564153 | -0.0557624 | 0.41246373 | -0.1351934 | 0.89245893 | 0.9595291  |
| Orc4        | 5678.90819 | -0.0558156 | 0.20656763 | -0.2702051 | 0.78700249 | 0.9162057  |
| Pdia5       | 3900.84531 | -0.0558547 | 0.1776331  | -0.3144387 | 0.75318784 | 0.90191816 |
| Slc25a4     | 17526.9722 | -0.0558815 | 0.27894387 | -0.2003324 | 0.84122062 | 0.93940315 |
| Ntn1        | 3606.31484 | -0.0559857 | 0.29190285 | -0.1917957 | 0.84790224 | 0.94163591 |
| H2-DMa      | 166.575252 | -0.0560241 | 0.28475775 | -0.196743  | 0.84402868 | 0.94103803 |
| Dmxl2       | 1808.13853 | -0.0560678 | 0.25464819 | -0.2201776 | 0.82573282 | 0.93152509 |
| ldh3b       | 9932.69505 | -0.0561382 | 0.16411033 | -0.3420758 | 0.73229382 | 0.891798   |
| Lpgat1      | 4384.66469 | -0.056156  | 0.22688696 | -0.2475067 | 0.8045161  | 0.92394305 |
| Rab22a      | 1450.48289 | -0.0562212 | 0.17686135 | -0.3178828 | 0.75057385 | 0.90097402 |
| Acer3       | 1393.07622 | -0.056348  | 0.23585768 | -0.2389069 | 0.81117776 | 0.92788711 |
| Fam228b     | 96.1904246 | -0.0564226 | 0.3417884  | -0.1650804 | 0.86888068 | 0.9493616  |
| Hspg2       | 14374.434  | -0.0565242 | 0.28806842 | -0.1962181 | 0.84443949 | 0.94115145 |
| Gtf3a       | 2759.16253 | -0.0565766 | 0.15836593 | -0.3572526 | 0.72090269 | 0.88656328 |
| Tmem229a    | 11.6611926 | -0.0565874 | 0.42729202 | -0.1324326 | 0.89464209 | 0.96034922 |
| Papd4       | 3086.86561 | -0.0566175 | 0.16852373 | -0.3359613 | 0.73690004 | 0.89391803 |
| Polr1b      | 7328.2583  | -0.0567681 | 0.25373565 | -0.2237293 | 0.82296794 | 0.93107393 |
| Sarm1       | 768.273844 | -0.0567795 | 0.21330554 | -0.2661887 | 0.79009387 | 0.91812832 |
| D330050I16R | 74.2153857 | -0.0568645 | 0.31001977 | -0.1834223 | 0.85446668 | 0.94447447 |
| Btd         | 564.621664 | -0.0569665 | 0.22100937 | -0.2577562 | 0.7965951  | 0.92070321 |
| Tmem57      | 3287.72993 | -0.0569865 | 0.16128595 | -0.3533257 | 0.72384426 | 0.88829071 |
| Snora52     | 96.6029984 | -0.0569969 | 0.38741905 | -0.1471196 | 0.8830376  | 0.95561014 |
| Osbp13      | 850.207176 | -0.057     | 0.29861557 | -0.190881  | 0.84861882 | 0.94216258 |
| Capn5       | 4674.04071 | -0.0570731 | 0.20918427 | -0.2728366 | 0.78497879 | 0.9153312  |
| Nppb        | 47.6052449 | -0.0570772 | 0.4001909  | -0.1426249 | 0.88658642 | 0.95661824 |
| B230206H07I | 1.50052219 | -0.0571222 | 0.26218973 | -0.2178657 | 0.82753372 | NA         |
| Tollip      | 3637.4382  | -0.0571272 | 0.17492359 | -0.3265839 | 0.74398265 | 0.89792443 |
| Pdpr        | 1154.42058 | -0.0571293 | 0.33308998 | -0.171513  | 0.86382043 | 0.94702747 |
| Pdx1        | 4.9031477  | -0.0571768 | 0.39854166 | -0.1434651 | 0.88592284 | NA         |

|             |            |            |            |            |            |            |
|-------------|------------|------------|------------|------------|------------|------------|
| Sepp1       | 110.915058 | -0.0571865 | 0.40389692 | -0.1415868 | 0.88740636 | 0.95687535 |
| Ctnna3      | 1.12848539 | -0.0572104 | 0.26988823 | -0.2119781 | 0.83212412 | NA         |
| St7l        | 509.571105 | -0.057313  | 0.19250388 | -0.2977241 | 0.76591378 | 0.90618168 |
| Sec14l3     | 10.1183626 | -0.0574255 | 0.4313566  | -0.1331277 | 0.89409243 | 0.96010139 |
| Snord42a    | 39.396727  | -0.0575152 | 0.37665083 | -0.1527016 | 0.8786336  | 0.95349833 |
| Stx1a       | 283.715831 | -0.0575235 | 0.25136345 | -0.2288461 | 0.81898852 | 0.93036217 |
| Sec31a      | 12965.6616 | -0.0575808 | 0.22097033 | -0.2605815 | 0.79441527 | 0.91975523 |
| Tmem198b    | 803.766084 | -0.0576251 | 0.22787506 | -0.2528801 | 0.80036084 | 0.92264456 |
| Trim28      | 90425.2284 | -0.0577076 | 0.21395781 | -0.2697146 | 0.78737979 | 0.91657594 |
| Kctd7       | 380.703466 | -0.0578098 | 0.2056822  | -0.2810636 | 0.77866159 | 0.91243813 |
| Mlf2        | 17045.9549 | -0.0578793 | 0.18235091 | -0.3174063 | 0.75093535 | 0.90106448 |
| Atp6ap1l    | 2.53592476 | -0.0579292 | 0.31185641 | -0.185756  | 0.85263611 | NA         |
| Zfp707      | 708.40508  | -0.0580248 | 0.23255002 | -0.2495153 | 0.80296219 | 0.92352256 |
| Aldh8a1     | 1.89990975 | -0.0581096 | 0.27606101 | -0.2104954 | 0.83328104 | NA         |
| Crct1       | 0.89009628 | -0.0581357 | 0.22473121 | -0.2586899 | 0.7958745  | NA         |
| Zfp536      | 8.75131255 | -0.0581885 | 0.42276837 | -0.1376368 | 0.89052747 | 0.9584185  |
| Zfp329      | 1431.07801 | -0.0582596 | 0.20037147 | -0.2907579 | 0.7712365  | 0.90875167 |
| LOC10003894 | 1.17227051 | -0.0582771 | 0.24220096 | -0.2406146 | 0.80985387 | NA         |
| Rbm12b2     | 1328.12208 | -0.0584427 | 0.16867296 | -0.3464854 | 0.72897799 | 0.89031153 |
| Wdr5        | 32394.5591 | -0.0585018 | 0.17866101 | -0.327446  | 0.74333056 | 0.89745937 |
| Mlc1        | 1.08741495 | -0.0585372 | 0.18303109 | -0.3198209 | 0.74910409 | NA         |
| Lrwd1       | 4921.32012 | -0.0585413 | 0.18580738 | -0.3150643 | 0.75271282 | 0.90191816 |
| Ppp2cb      | 7007.19363 | -0.0585651 | 0.17029371 | -0.3439062 | 0.73091685 | 0.89127954 |
| Ppp3r1      | 7548.89052 | -0.0586388 | 0.19320814 | -0.3035006 | 0.76150839 | 0.90466935 |
| Taf3        | 1996.87148 | -0.058645  | 0.20908944 | -0.280478  | 0.77911078 | 0.91248318 |
| Xpot        | 16618.5275 | -0.0586683 | 0.16845029 | -0.3482824 | 0.72762808 | 0.88986097 |
| Polr3g      | 9420.0119  | -0.0586768 | 0.14581299 | -0.4024111 | 0.68738148 | 0.87088718 |
| Stk32c      | 5.00537555 | -0.058721  | 0.34128524 | -0.1720584 | 0.86339164 | NA         |
| Vamp2       | 1127.08324 | -0.0587671 | 0.21098426 | -0.2785378 | 0.78059952 | 0.91308099 |
| LOC10105604 | 4696.91663 | -0.0588173 | 0.21368236 | -0.2752555 | 0.78311991 | 0.91408074 |
| Tmem241     | 344.989053 | -0.0588258 | 0.2645782  | -0.222338  | 0.82405073 | 0.93107393 |
| Bivm        | 1986.4089  | -0.0589005 | 0.17349623 | -0.3394917 | 0.73423934 | 0.89274089 |
| Ndufa12     | 2343.71931 | -0.0589131 | 0.2253484  | -0.2614311 | 0.7937601  | 0.91974128 |
| Nelfa       | 4606.09419 | -0.0589391 | 0.15880291 | -0.3711465 | 0.71052841 | 0.88211938 |
| Tbc1d19     | 1271.76458 | -0.0589576 | 0.16422559 | -0.3590039 | 0.71959215 | 0.88592422 |
| Cyp4f41-ps  | 29.9685863 | -0.0589985 | 0.40287118 | -0.1464451 | 0.88357    | 0.95568774 |
| Mrps17      | 3551.53259 | -0.0590055 | 0.19827535 | -0.2975937 | 0.76601332 | 0.90618168 |
| Dctn1       | 5136.23425 | -0.0590177 | 0.22358146 | -0.263965  | 0.79180692 | 0.91870398 |
| Hhla1       | 1.36196626 | -0.059122  | 0.21780509 | -0.2714445 | 0.78604919 | NA         |
| Uxs1        | 1929.79172 | -0.0591232 | 0.16404923 | -0.3603992 | 0.71854865 | 0.88550762 |
| Cxcl14      | 415.50873  | -0.0591644 | 0.40475743 | -0.1461724 | 0.88378531 | 0.95568774 |



|             |            |            |            |            |            |            |
|-------------|------------|------------|------------|------------|------------|------------|
| Gm438       | 1.15496932 | -0.0591777 | 0.2707932  | -0.2185345 | 0.82701265 | NA         |
| Snhg6       | 5695.48264 | -0.0592279 | 0.29475826 | -0.2009373 | 0.84074758 | 0.93940315 |
| Dbr1        | 3102.44345 | -0.0592503 | 0.18456055 | -0.3210347 | 0.74818411 | 0.90057336 |
| Fibp        | 1736.78147 | -0.0592701 | 0.23204379 | -0.2554265 | 0.79839369 | 0.92164102 |
| Cluap1      | 1599.40412 | -0.059274  | 0.20675567 | -0.286686  | 0.77435275 | 0.91001261 |
| Cldnd2      | 4.90451651 | -0.0593614 | 0.41210178 | -0.1440455 | 0.88546455 | NA         |
| Fam78a      | 1162.37768 | -0.0593727 | 0.28583395 | -0.2077176 | 0.83544949 | 0.93656826 |
| Gatad2a     | 12636.5313 | -0.0593754 | 0.23232141 | -0.2555744 | 0.79827952 | 0.92164102 |
| Cacna1b     | 37.9365683 | -0.0594596 | 0.41200016 | -0.1443193 | 0.88524833 | 0.95578308 |
| Cnksr3      | 1179.51002 | -0.0595401 | 0.23545273 | -0.2528748 | 0.80036494 | 0.92264456 |
| Ccdc42      | 1.72507956 | -0.0595822 | 0.23229176 | -0.2564972 | 0.79756691 | NA         |
| Gm11487     | 2.54859308 | -0.0596473 | 0.31311167 | -0.1904986 | 0.84891845 | NA         |
| Begain      | 120.780701 | -0.0596838 | 0.27884485 | -0.2140394 | 0.83051631 | 0.9337556  |
| Smim20      | 1221.67338 | -0.0597974 | 0.21743743 | -0.2750099 | 0.78330865 | 0.91416382 |
| Fam124a     | 31.387342  | -0.0598203 | 0.41045163 | -0.1457427 | 0.88412451 | 0.95575952 |
| Rtf1        | 6328.00069 | -0.0598478 | 0.17892686 | -0.3344819 | 0.73801598 | 0.89447493 |
| Hist1h2ac   | 1.51344941 | -0.0600631 | 0.2889532  | -0.2078644 | 0.83533487 | NA         |
| Qtrt1       | 3211.8085  | -0.060083  | 0.19127268 | -0.3141223 | 0.75342813 | 0.90191816 |
| Psm2        | 16255.6452 | -0.0601044 | 0.16518357 | -0.3638642 | 0.71595941 | 0.88472721 |
| Ppp2r5a     | 3862.71151 | -0.060169  | 0.20231134 | -0.297408  | 0.76615502 | 0.90618168 |
| Cldn4       | 4242.07022 | -0.0601863 | 0.27590842 | -0.2181388 | 0.82732099 | 0.93199444 |
| Tesk2       | 2597.73738 | -0.0601937 | 0.16696368 | -0.3605196 | 0.71845862 | 0.88550762 |
| Dnajc5b     | 26.9941418 | -0.060205  | 0.42831857 | -0.1405612 | 0.88821657 | 0.95728435 |
| Ppp4c       | 11878.8483 | -0.060235  | 0.187971   | -0.3204486 | 0.74862827 | 0.900659   |
| Arrdc1      | 753.375474 | -0.0602823 | 0.2554238  | -0.2360091 | 0.8134256  | 0.92878688 |
| Cyhr1       | 3031.92467 | -0.0603314 | 0.18980619 | -0.3178579 | 0.75059275 | 0.90097402 |
| Arel1       | 2724.3694  | -0.0603469 | 0.19339293 | -0.3120431 | 0.7550078  | 0.90191816 |
| Cntnap4     | 1.1896004  | -0.0603865 | 0.2718701  | -0.2221153 | 0.82422414 | NA         |
| Tmem184b    | 3466.0717  | -0.0604188 | 0.19643918 | -0.3075698 | 0.75840967 | 0.90307174 |
| Dusp15      | 11.710784  | -0.0604651 | 0.43219664 | -0.1399018 | 0.88873758 | 0.95743646 |
| Mief1       | 4714.87521 | -0.0604724 | 0.20124153 | -0.3004964 | 0.76379852 | 0.90552953 |
| Tmtc1       | 555.762637 | -0.0605482 | 0.34592558 | -0.1750325 | 0.86105413 | 0.94574328 |
| Tmem33      | 4509.75852 | -0.0605521 | 0.1629385  | -0.3716257 | 0.71017158 | 0.88195802 |
| Mrvi1       | 15.4024648 | -0.0605546 | 0.428683   | -0.1412573 | 0.88766665 | 0.95695696 |
| Gm11651     | 0.97413712 | -0.0606239 | 0.20221004 | -0.2998067 | 0.76432464 | NA         |
| 2700060E02F | 16317.0365 | -0.0606572 | 0.21882018 | -0.2772013 | 0.78162552 | 0.91337854 |
| Zfp286      | 683.062928 | -0.0606669 | 0.30044458 | -0.2019237 | 0.83997638 | 0.93900315 |
| Pyroxd1     | 891.823691 | -0.0606796 | 0.16744331 | -0.3623887 | 0.71706158 | 0.88488973 |
| Pomp        | 8708.57956 | -0.060849  | 0.19537626 | -0.311445  | 0.75546232 | 0.90203956 |
| Mpg         | 1277.64989 | -0.0609209 | 0.25322533 | -0.2405798 | 0.80988084 | 0.92748171 |
| Atp5j       | 13399.8397 | -0.0609262 | 0.16700075 | -0.3648262 | 0.71524117 | 0.88470138 |

|           |            |            |            |            |            |            |
|-----------|------------|------------|------------|------------|------------|------------|
| Sfxn3     | 1860.07546 | -0.0609551 | 0.1876945  | -0.324757  | 0.74536502 | 0.89871411 |
| Pnp       | 4353.13125 | -0.060991  | 0.23642125 | -0.257976  | 0.7964254  | 0.92070321 |
| Cnih1     | 5092.24216 | -0.0610202 | 0.17353175 | -0.3516373 | 0.72511028 | 0.88898579 |
| Vrk3      | 2049.39672 | -0.0610892 | 0.16938378 | -0.3606553 | 0.71835717 | 0.88550762 |
| Fcgr1     | 0.87754645 | -0.0611321 | 0.22416308 | -0.2727124 | 0.7850743  | NA         |
| Hist2h2ab | 0.87754645 | -0.0611321 | 0.22416308 | -0.2727124 | 0.7850743  | NA         |
| I7Rn6     | 3807.72329 | -0.0611678 | 0.26399515 | -0.2317004 | 0.81677074 | 0.93007067 |
| Coq10a    | 892.215578 | -0.061308  | 0.27024177 | -0.2268636 | 0.8205298  | 0.930536   |
| Uqcrc1    | 18525.5305 | -0.0613964 | 0.17417198 | -0.3525045 | 0.72445997 | 0.88863204 |
| Suv420h1  | 4158.03965 | -0.0614372 | 0.17107675 | -0.3591209 | 0.71950461 | 0.88592422 |
| Hspbap1   | 8482.88355 | -0.0615389 | 0.21316796 | -0.2886875 | 0.77282051 | 0.90962818 |
| Cyb5r4    | 4019.15916 | -0.061546  | 0.22897727 | -0.2687864 | 0.78809406 | 0.91705183 |
| Pacrgl    | 785.428697 | -0.0615926 | 0.17714704 | -0.3476917 | 0.7280717  | 0.88997352 |
| Cib2      | 29.866869  | -0.0616813 | 0.42370473 | -0.1455763 | 0.88425592 | 0.95575952 |
| Desi2     | 3634.40512 | -0.061717  | 0.20910496 | -0.2951485 | 0.76788044 | 0.90649963 |
| Cdh10     | 6.56628994 | -0.061747  | 0.37345649 | -0.1653393 | 0.86867695 | 0.94931801 |
| Dhx30     | 7914.15506 | -0.0617592 | 0.17836751 | -0.3462468 | 0.72915723 | 0.89032067 |
| Scd2      | 105809.953 | -0.0618326 | 0.20092181 | -0.3077447 | 0.75827657 | 0.90307174 |
| Immt      | 24188.4139 | -0.061902  | 0.16339391 | -0.3788511 | 0.70479844 | 0.87942876 |
| Spty2d1   | 1312.90682 | -0.0619306 | 0.22619279 | -0.2737955 | 0.78424177 | 0.91477226 |
| Irak1     | 4263.1192  | -0.0619478 | 0.16210313 | -0.3821506 | 0.70234965 | 0.87879687 |
| Cdc42ep1  | 187.239666 | -0.0620005 | 0.28498863 | -0.2175542 | 0.82777646 | 0.9324027  |
| Hnrnpa2b1 | 68007.2126 | -0.0621334 | 0.18396363 | -0.3377481 | 0.73555303 | 0.89343006 |
| Ythdf2    | 8202.53516 | -0.062157  | 0.19447213 | -0.3196193 | 0.74925695 | 0.90084943 |
| Tgfbr1    | 3535.30191 | -0.0621772 | 0.24547577 | -0.2532927 | 0.80004207 | 0.92248631 |
| Ghrh      | 0.97689019 | -0.062277  | 0.20422411 | -0.3049446 | 0.76040837 | NA         |
| Fbxo10    | 626.40051  | -0.06232   | 0.21125771 | -0.294995  | 0.76799772 | 0.90649963 |
| Map4k1    | 2995.69471 | -0.0624003 | 0.16658525 | -0.374585  | 0.70796915 | 0.88112271 |
| Plcl1     | 9.6761681  | -0.0624659 | 0.42715484 | -0.1462372 | 0.88373417 | 0.95568774 |
| Gm5464    | 2.90543904 | -0.0625046 | 0.30160339 | -0.2072409 | 0.83582173 | NA         |
| Dnajc30   | 658.226416 | -0.062515  | 0.20267152 | -0.308455  | 0.75773615 | 0.90307174 |
| Plcb3     | 9039.44283 | -0.0626186 | 0.19682961 | -0.3181359 | 0.75038184 | 0.90095125 |
| Usf2      | 2153.28717 | -0.0626341 | 0.17198261 | -0.3641888 | 0.715717   | 0.88472721 |
| Gm8801    | 48.1561314 | -0.0626484 | 0.32308603 | -0.1939064 | 0.84624917 | 0.94147896 |
| Tagap     | 121.785267 | -0.0626747 | 0.33819728 | -0.1853201 | 0.852978   | 0.94423839 |
| Vwc2      | 1.1915987  | -0.0627532 | 0.24559076 | -0.2555194 | 0.798322   | NA         |
| Lage3     | 3014.44304 | -0.0627784 | 0.21834883 | -0.2875141 | 0.77371869 | 0.9098882  |
| Gabrq     | 0.92970927 | -0.0627953 | 0.20007665 | -0.3138562 | 0.75363023 | NA         |
| Gm5800    | 0.87039071 | -0.0628135 | 0.22382774 | -0.2806334 | 0.77899156 | NA         |
| Dennd2c   | 8987.43056 | -0.0628418 | 0.18070036 | -0.347768  | 0.72801445 | 0.88997348 |
| Smok2a    | 3.20532055 | -0.0628765 | 0.33218915 | -0.1892791 | 0.84987404 | NA         |

|             |            |            |            |            |            |            |
|-------------|------------|------------|------------|------------|------------|------------|
| P2rx2       | 194.310274 | -0.062952  | 0.35401508 | -0.1778228 | 0.85886213 | 0.9455234  |
| Sectm1a     | 3.39642279 | -0.0629525 | 0.34258605 | -0.1837568 | 0.85420426 | NA         |
| Tmem216     | 606.110251 | -0.0630856 | 0.18059824 | -0.3493146 | 0.72685311 | 0.88950684 |
| Sbno2       | 3481.58663 | -0.0631284 | 0.2050074  | -0.3079323 | 0.75813387 | 0.90307174 |
| Sars2       | 2032.05223 | -0.0631536 | 0.18880696 | -0.3344877 | 0.73801153 | 0.89447493 |
| Selt        | 13045.7912 | -0.0631747 | 0.20458749 | -0.3087906 | 0.7574808  | 0.90301693 |
| Ormdl3      | 1666.72068 | -0.0632125 | 0.19170427 | -0.3297399 | 0.74159654 | 0.89649936 |
| Krtap4-13   | 0.62820685 | -0.0632315 | 0.17816309 | -0.354908  | 0.72265851 | NA         |
| Rsc1a1      | 0.62820685 | -0.0632315 | 0.17816309 | -0.354908  | 0.72265851 | NA         |
| Olf773      | 0.62820685 | -0.0632315 | 0.17816309 | -0.354908  | 0.72265851 | NA         |
| Gtpbp8      | 391.065333 | -0.0632365 | 0.26661252 | -0.237185  | 0.81251323 | 0.92873159 |
| Apoa1bp     | 2756.04834 | -0.06325   | 0.22495811 | -0.2811635 | 0.77858503 | 0.91241717 |
| Scn3b       | 168.027292 | -0.0633304 | 0.32602466 | -0.1942504 | 0.84597983 | 0.94147896 |
| Islr        | 2.50955933 | -0.0633416 | 0.3183341  | -0.1989784 | 0.84227962 | NA         |
| Gpr50       | 17.4110241 | -0.0633562 | 0.43224419 | -0.146575  | 0.88346746 | 0.95568774 |
| Cebpg       | 2704.71406 | -0.063404  | 0.23249383 | -0.2727126 | 0.78507411 | 0.9153312  |
| Piwil1      | 110.227248 | -0.0634057 | 0.29668046 | -0.213717  | 0.83076775 | 0.9337556  |
| Bag6        | 15503.6705 | -0.0635075 | 0.20121355 | -0.3156222 | 0.75228928 | 0.90182644 |
| Polr3c      | 2915.83771 | -0.0636645 | 0.19352766 | -0.3289683 | 0.74217967 | 0.8968469  |
| Cnst        | 1503.16876 | -0.0636909 | 0.20045925 | -0.3177249 | 0.75069364 | 0.90098301 |
| 4930426L09F | 3.3894078  | -0.0637231 | 0.37997499 | -0.1677035 | 0.86681652 | NA         |
| Mrpl48      | 1320.10419 | -0.0638094 | 0.24581205 | -0.2595859 | 0.79518319 | 0.92001293 |
| Cd300lg     | 1.02820844 | -0.0638539 | 0.20241095 | -0.3154665 | 0.75240749 | NA         |
| Recql       | 2881.55048 | -0.0638685 | 0.15262343 | -0.4184711 | 0.67560273 | 0.8644313  |
| Themis2     | 30.2027949 | -0.0639249 | 0.3903988  | -0.1637425 | 0.86993385 | 0.94982386 |
| Dysf        | 339.994237 | -0.0639588 | 0.28188474 | -0.2268969 | 0.82050395 | 0.930536   |
| Tsc22d2     | 1765.11499 | -0.0640125 | 0.21366236 | -0.2995965 | 0.76448496 | 0.90596301 |
| Cps1        | 27.552069  | -0.064035  | 0.41048979 | -0.1559966 | 0.87603571 | 0.95264675 |
| Frat2       | 540.511673 | -0.0641326 | 0.24765588 | -0.2589584 | 0.79566735 | 0.92042659 |
| Zc3h11a     | 14830.1254 | -0.0641698 | 0.15907401 | -0.4033959 | 0.68665702 | 0.87055301 |
| Gnmt        | 94.4621943 | -0.0641876 | 0.38276689 | -0.1676937 | 0.86682423 | 0.94862657 |
| Usp12       | 3264.96707 | -0.0642161 | 0.20245371 | -0.3171891 | 0.75110009 | 0.90112308 |
| Dhps        | 2268.48047 | -0.0642503 | 0.22635171 | -0.2838518 | 0.77652394 | 0.91103159 |
| Rprd2       | 3858.92478 | -0.0642529 | 0.21672528 | -0.2964716 | 0.76686993 | 0.90649963 |
| Asah2       | 45.4506011 | -0.0643563 | 0.35410525 | -0.1817434 | 0.85578412 | 0.94458789 |
| Snap23      | 3846.43007 | -0.0643566 | 0.17680235 | -0.364003  | 0.71585577 | 0.88472721 |
| Usp11       | 2437.34369 | -0.0643725 | 0.25253461 | -0.2549058 | 0.79879586 | 0.92171351 |
| Myl6b       | 285.314401 | -0.0643767 | 0.38835829 | -0.1657661 | 0.86834099 | 0.9493136  |
| Ahsa1       | 20918.0196 | -0.0644282 | 0.18417725 | -0.3498162 | 0.72647665 | 0.88950597 |
| Mir343      | 4.62885529 | -0.0644334 | 0.40218412 | -0.1602087 | 0.87271666 | NA         |
| Akirin2     | 5646.11901 | -0.0644536 | 0.17197592 | -0.3747825 | 0.7078222  | 0.88112271 |

|             |            |            |            |            |            |            |
|-------------|------------|------------|------------|------------|------------|------------|
| Kmt2a       | 4932.68406 | -0.0645551 | 0.29020514 | -0.2224465 | 0.82396629 | 0.93107393 |
| Golt1a      | 23.9062033 | -0.0646027 | 0.42143898 | -0.1532908 | 0.87816892 | 0.95329223 |
| 2310068J16R | 26.1850011 | -0.0646357 | 0.39509779 | -0.1635942 | 0.87005059 | 0.94988464 |
| Pknx1       | 2427.66068 | -0.0646411 | 0.17993863 | -0.3592395 | 0.71941589 | 0.88592422 |
| Pnkd        | 2301.2985  | -0.0646424 | 0.19890009 | -0.3249992 | 0.74518166 | 0.89859801 |
| Gml         | 1.16714176 | -0.0646903 | 0.27127494 | -0.2384676 | 0.81151845 | NA         |
| Aspg        | 232.070939 | -0.0647913 | 0.32147708 | -0.2015424 | 0.84027446 | 0.93906635 |
| Rad23b      | 27589.7106 | -0.0648254 | 0.15861733 | -0.4086904 | 0.68276691 | 0.86812434 |
| Supt5       | 14221.5148 | -0.0648713 | 0.2050219  | -0.3164117 | 0.75169001 | 0.90161989 |
| Rnf181      | 14843.7156 | -0.0648826 | 0.20187504 | -0.3213999 | 0.74790738 | 0.90055809 |
| Bhlhe40     | 2884.71234 | -0.0649024 | 0.37736743 | -0.1719874 | 0.86344744 | 0.94702747 |
| RbmX        | 1221.5727  | -0.0649294 | 0.20353935 | -0.3190019 | 0.74972508 | 0.90092221 |
| Hist2h4     | 1.83641905 | -0.0649391 | 0.30900355 | -0.2101564 | 0.83354561 | NA         |
| Csf3r       | 272.322906 | -0.0649607 | 0.42430822 | -0.1530979 | 0.87832108 | 0.95329223 |
| Kcnj1       | 1.75861688 | -0.065084  | 0.32461001 | -0.2004992 | 0.84109021 | NA         |
| Stx12       | 5889.52163 | -0.0650945 | 0.18283312 | -0.3560324 | 0.72181632 | 0.88699847 |
| Mamdc2      | 10.4025808 | -0.0651846 | 0.40046215 | -0.1627734 | 0.87069686 | 0.95025664 |
| Zswim4      | 1563.07343 | -0.0652134 | 0.24633595 | -0.2647337 | 0.79121462 | 0.91829081 |
| 1810037I17R | 5204.45196 | -0.0652493 | 0.20847745 | -0.31298   | 0.75429588 | 0.90191816 |
| Srsf9       | 5664.69253 | -0.0653197 | 0.14633868 | -0.44636   | 0.65533722 | 0.85234189 |
| Hspa4       | 68544.8122 | -0.0653482 | 0.16872618 | -0.3873032 | 0.69853173 | 0.87701346 |
| Xpnpep3     | 1215.62793 | -0.0653629 | 0.26724686 | -0.2445786 | 0.80678272 | 0.92559319 |
| Tbl2        | 4318.59638 | -0.0653719 | 0.16828948 | -0.3884494 | 0.6976835  | 0.87645821 |
| Gm10406     | 31.4109011 | -0.0654085 | 0.38325869 | -0.1706641 | 0.86448792 | 0.94733646 |
| Bnip3l      | 6042.69609 | -0.0654524 | 0.15823608 | -0.4136379 | 0.67913932 | 0.86604267 |
| Mettl20     | 312.722667 | -0.065483  | 0.29063569 | -0.2253096 | 0.8217384  | 0.93076517 |
| Timm17b     | 2243.8457  | -0.0654976 | 0.23249711 | -0.2817135 | 0.77816318 | 0.91216552 |
| Dph2        | 1190.47035 | -0.0654995 | 0.20176501 | -0.3246328 | 0.74545902 | 0.89871411 |
| Omt2b       | 2.99325915 | -0.0655168 | 0.30004882 | -0.2183538 | 0.82715343 | NA         |
| Ap1b1       | 4871.72157 | -0.0655519 | 0.26473202 | -0.247616  | 0.80443155 | 0.92394305 |
| 2810013P06F | 585.351285 | -0.065558  | 0.20286743 | -0.3231568 | 0.74657649 | 0.89958244 |
| Taf15       | 9712.68159 | -0.0655756 | 0.15793105 | -0.4152167 | 0.67798328 | 0.86555439 |
| 1110012L19F | 1315.30792 | -0.0656129 | 0.197789   | -0.3317317 | 0.74009183 | 0.89544909 |
| Vps28       | 3231.5233  | -0.065618  | 0.23175967 | -0.2831296 | 0.7770775  | 0.91147475 |
| 5730403I07R | 7.87933044 | -0.0656464 | 0.41706878 | -0.1573994 | 0.87493012 | 0.95244465 |
| Ctdp1       | 3297.95564 | -0.0656522 | 0.21105279 | -0.3110698 | 0.75574754 | 0.90203956 |
| Rpia        | 916.739565 | -0.0657532 | 0.19432335 | -0.33837   | 0.73508439 | 0.89329078 |
| Hsd17b13    | 1.19782122 | -0.0657824 | 0.18361189 | -0.3582689 | 0.72014205 | NA         |
| Snhg8       | 1974.38102 | -0.0658557 | 0.21838054 | -0.3015637 | 0.76298465 | 0.90522666 |
| Nkain3      | 2.49880594 | -0.0658717 | 0.3495261  | -0.18846   | 0.85051608 | NA         |
| Tas1r3      | 2.64436073 | -0.0658865 | 0.28701019 | -0.2295617 | 0.81843237 | NA         |

|             |            |            |            |            |            |            |
|-------------|------------|------------|------------|------------|------------|------------|
| Crhr1       | 1.12810801 | -0.0660415 | 0.27003212 | -0.2445692 | 0.80679    | NA         |
| Swap70      | 5038.67089 | -0.066055  | 0.16968445 | -0.3892815 | 0.69706794 | 0.87645821 |
| Ndufa10     | 7743.67622 | -0.0661471 | 0.17951762 | -0.3684712 | 0.71252193 | 0.88374769 |
| Dnajc16     | 1349.47007 | -0.0661913 | 0.21075874 | -0.3140621 | 0.75347389 | 0.90191816 |
| Cnot6       | 6704.04872 | -0.0662109 | 0.24401056 | -0.2713446 | 0.78612601 | 0.9157961  |
| Efcab2      | 196.470564 | -0.066258  | 0.29044228 | -0.2281279 | 0.8195468  | 0.93046822 |
| Gtf2e2      | 9700.96731 | -0.0662973 | 0.19332869 | -0.3429254 | 0.73165457 | 0.89154993 |
| Smek1       | 11667.9309 | -0.0665323 | 0.22811207 | -0.2916648 | 0.77054292 | 0.90826951 |
| Tug1        | 9312.68634 | -0.0665336 | 0.22380494 | -0.2972839 | 0.7662498  | 0.90621355 |
| Rpf2        | 5864.41799 | -0.0666877 | 0.18510437 | -0.360271  | 0.71864447 | 0.88550762 |
| Slmo2       | 6174.88242 | -0.0666904 | 0.15234135 | -0.4377693 | 0.66155352 | 0.85567819 |
| Klf5        | 7319.28122 | -0.0667114 | 0.19543719 | -0.3413444 | 0.7328443  | 0.89216077 |
| Epg5        | 1523.35723 | -0.0668409 | 0.25067455 | -0.2666442 | 0.78974312 | 0.91796579 |
| Impa1       | 8124.96781 | -0.0668839 | 0.1778104  | -0.3761527 | 0.70680338 | 0.88068873 |
| Cops7a      | 9271.67477 | -0.0668978 | 0.14386476 | -0.465005  | 0.6419279  | 0.84385084 |
| Shc1        | 7029.88903 | -0.0669203 | 0.22649222 | -0.2954639 | 0.76763951 | 0.90649963 |
| Mir8110     | 1.58670207 | -0.0669933 | 0.26147861 | -0.2562093 | 0.79778919 | NA         |
| Gin1        | 673.295472 | -0.0671917 | 0.28767873 | -0.2335651 | 0.81532262 | 0.92939072 |
| 1700017J07R | 11.3518322 | -0.0672274 | 0.43109102 | -0.155947  | 0.87607477 | 0.95264675 |
| Stac        | 0.65028811 | -0.0672314 | 0.18071368 | -0.3720329 | 0.70986837 | NA         |
| Itgb6       | 0.65028811 | -0.0672314 | 0.18071368 | -0.3720329 | 0.70986837 | NA         |
| Gm14446     | 0.65028811 | -0.0672314 | 0.18071368 | -0.3720329 | 0.70986837 | NA         |
| Nat2        | 348.721097 | -0.0673162 | 0.29389578 | -0.229048  | 0.81883159 | 0.93036217 |
| Actc1       | 1.01554655 | -0.0674062 | 0.20627543 | -0.3267775 | 0.74383621 | NA         |
| Phykpl      | 265.527134 | -0.0674775 | 0.27719272 | -0.2434316 | 0.8076711  | 0.92614835 |
| Cept1       | 3472.11959 | -0.0674803 | 0.201752   | -0.3344715 | 0.73802378 | 0.89447493 |
| Itpr2       | 112.847151 | -0.0675009 | 0.35005591 | -0.1928289 | 0.847093   | 0.94147896 |
| Trim24      | 13353.4012 | -0.0675247 | 0.17731642 | -0.3808148 | 0.70334068 | 0.87928906 |
| Rabgta      | 3442.48585 | -0.0676986 | 0.21335675 | -0.3173025 | 0.75101407 | 0.9010894  |
| Gmfb        | 8527.30933 | -0.0678546 | 0.17669716 | -0.3840165 | 0.70096625 | 0.87785127 |
| Zbtb32      | 1133.8259  | -0.0679067 | 0.24579329 | -0.2762755 | 0.78233644 | 0.91381112 |
| Ddx41       | 5333.24187 | -0.0679708 | 0.18061507 | -0.3763299 | 0.70667168 | 0.88063557 |
| Zfp148      | 5900.7955  | -0.0680051 | 0.19472909 | -0.3492295 | 0.726917   | 0.88950684 |
| Pla2g4e     | 1158.4755  | -0.0680902 | 0.36886734 | -0.1845925 | 0.85354865 | 0.94431772 |
| Xlr3b       | 435.952915 | -0.0680947 | 0.30544882 | -0.2229334 | 0.82358736 | 0.93107393 |
| Ring1       | 603.663887 | -0.0681406 | 0.2048399  | -0.3326531 | 0.73939616 | 0.89515154 |
| 2310040G24I | 129.965319 | -0.0681607 | 0.31031227 | -0.219652  | 0.82614222 | 0.9316416  |
| Parn        | 4765.91802 | -0.0681805 | 0.15819522 | -0.4309895 | 0.66647598 | 0.85861718 |
| Mrpl3       | 3803.70514 | -0.0682223 | 0.18988668 | -0.3592792 | 0.7193862  | 0.88592422 |
| Rabgap1     | 6671.09757 | -0.0682251 | 0.1826145  | -0.3736017 | 0.70870063 | 0.88125982 |
| Bloc1s1     | 2058.46923 | -0.068235  | 0.20851803 | -0.3272377 | 0.74348809 | 0.89753014 |

|             |            |            |            |            |            |            |
|-------------|------------|------------|------------|------------|------------|------------|
| Cluh        | 9016.90594 | -0.0682404 | 0.2472903  | -0.2759524 | 0.78258463 | 0.91393614 |
| Focad       | 3168.54379 | -0.0682612 | 0.22026384 | -0.3099067 | 0.75663187 | 0.9027453  |
| Rfk         | 3526.15395 | -0.0683282 | 0.1684805  | -0.4055556 | 0.68506913 | 0.86960331 |
| Onecut3     | 13.5876014 | -0.0683376 | 0.41595324 | -0.1642915 | 0.86950167 | 0.94948532 |
| Sumo2       | 51.4476605 | -0.0683911 | 0.35851154 | -0.1907639 | 0.84871056 | 0.94216329 |
| Slc22a6     | 0.60850128 | -0.068467  | 0.17783887 | -0.3849944 | 0.70024155 | NA         |
| Olf772      | 0.60850128 | -0.068467  | 0.17783887 | -0.3849944 | 0.70024155 | NA         |
| 1700001C02F | 0.60850128 | -0.068467  | 0.17783887 | -0.3849944 | 0.70024155 | NA         |
| Ctsb        | 16080.2698 | -0.068585  | 0.21662077 | -0.3166135 | 0.75153693 | 0.90157762 |
| Crebbp      | 1944.00761 | -0.0685879 | 0.33003063 | -0.2078228 | 0.83536735 | 0.9365437  |
| Cox6b1      | 16830.4781 | -0.0686597 | 0.23916126 | -0.2870855 | 0.77404685 | 0.90992938 |
| Timp4       | 1.07126747 | -0.0686984 | 0.20687464 | -0.3320774 | 0.7398308  | NA         |
| Khdrbs2     | 1.07126747 | -0.0686984 | 0.20687464 | -0.3320774 | 0.7398308  | NA         |
| 4931414P19F | 537.260025 | -0.0687023 | 0.18776545 | -0.3658944 | 0.71444387 | 0.88425449 |
| Vsnl1       | 0.97387178 | -0.0687702 | 0.20254045 | -0.339538  | 0.73420446 | NA         |
| 4930429F24F | 0.64313237 | -0.0688138 | 0.18024153 | -0.3817865 | 0.70261971 | NA         |
| Prm1        | 0.64313237 | -0.0688138 | 0.18024153 | -0.3817865 | 0.70261971 | NA         |
| Slc10a5     | 15.4405403 | -0.0688463 | 0.43204828 | -0.1593485 | 0.87339428 | 0.95171748 |
| BC004004    | 2359.14169 | -0.0688595 | 0.23322055 | -0.2952548 | 0.76779926 | 0.90649963 |
| Nme6        | 1645.04592 | -0.0688631 | 0.20487065 | -0.3361298 | 0.73677296 | 0.89391803 |
| Luc7l       | 11096.1297 | -0.0689081 | 0.18532313 | -0.371827  | 0.71002165 | 0.88195802 |
| Pisd        | 4965.00656 | -0.0689699 | 0.16206699 | -0.425564  | 0.6704256  | 0.86110051 |
| Clec4f      | 3.42905558 | -0.0690081 | 0.37710085 | -0.1829963 | 0.85480089 | NA         |
| Enthd2      | 1396.82747 | -0.0690301 | 0.21137481 | -0.3265769 | 0.74398793 | 0.89792443 |
| Dbn1d2      | 129.944498 | -0.0690696 | 0.3365447  | -0.2052316 | 0.8373912  | 0.93739351 |
| Lsr         | 1158.9006  | -0.0691573 | 0.3103346  | -0.2228474 | 0.82365425 | 0.93107393 |
| Cinp        | 3451.33168 | -0.0691808 | 0.17622543 | -0.3925699 | 0.69463715 | 0.87496374 |
| Tpte        | 6.30086141 | -0.0692244 | 0.3400475  | -0.2035727 | 0.83868741 | 0.93823667 |
| Shkbp1      | 2600.45247 | -0.0693107 | 0.19112066 | -0.3626542 | 0.7168632  | 0.88475711 |
| Gnrh1       | 9.45373363 | -0.069358  | 0.43065517 | -0.1610523 | 0.87205221 | 0.95106837 |
| Rab3gap2    | 3091.06284 | -0.0693709 | 0.20787506 | -0.3337146 | 0.73859495 | 0.89470602 |
| Kif3b       | 2523.62049 | -0.0693737 | 0.17460368 | -0.3973209 | 0.69113082 | 0.87369566 |
| Vps37d      | 177.295905 | -0.0694241 | 0.32301815 | -0.2149233 | 0.82982714 | 0.93342798 |
| Cyb561a3    | 984.673908 | -0.0694745 | 0.18974587 | -0.3661449 | 0.71425695 | 0.88425449 |
| B3gnt9      | 94.2800766 | -0.0694783 | 0.29549693 | -0.2351235 | 0.81411286 | 0.92878688 |
| Tut1        | 3063.36225 | -0.069513  | 0.2254901  | -0.3082752 | 0.75787294 | 0.90307174 |
| BC027231    | 3296.45333 | -0.0696254 | 0.24048708 | -0.2895184 | 0.77218471 | 0.90946064 |
| Serp1nb6e   | 0.69445062 | -0.0696481 | 0.1790771  | -0.3889281 | 0.69732935 | NA         |
| Btf3l4      | 1553.69339 | -0.0696565 | 0.18633678 | -0.3738206 | 0.70853777 | 0.88125982 |
| 4933439C10F | 123.298123 | -0.069658  | 0.33513082 | -0.2078533 | 0.83534354 | 0.9365437  |
| Med15       | 3345.64041 | -0.0696983 | 0.19108632 | -0.3647478 | 0.71529968 | 0.88470138 |

|              |            |            |            |            |            |            |
|--------------|------------|------------|------------|------------|------------|------------|
| Map2k1       | 10442.827  | -0.06972   | 0.16267214 | -0.4285921 | 0.6682201  | 0.85977126 |
| Cadm4        | 2794.9834  | -0.0697352 | 0.24759809 | -0.2816469 | 0.77821426 | 0.91216552 |
| Mfap3        | 2984.56817 | -0.0698433 | 0.23563399 | -0.2964057 | 0.76692025 | 0.90649963 |
| Astn2        | 2.56690116 | -0.0698494 | 0.2933076  | -0.2381437 | 0.81176961 | NA         |
| Tprgl        | 3961.80401 | -0.0698694 | 0.18492307 | -0.3778298 | 0.70555707 | 0.87995172 |
| Naa38        | 2986.59474 | -0.0699757 | 0.2335958  | -0.2995588 | 0.7645137  | 0.90596301 |
| Rabepk       | 2099.8237  | -0.070063  | 0.2272958  | -0.308246  | 0.75789518 | 0.90307174 |
| Lhx3         | 6.29556389 | -0.0701261 | 0.3565195  | -0.1966963 | 0.84406523 | 0.94103803 |
| Psm10        | 1718.20263 | -0.0701772 | 0.18729438 | -0.3746892 | 0.70789164 | 0.88112271 |
| Pcdhb19      | 0.66961629 | -0.0702154 | 0.18233636 | -0.3850872 | 0.70017283 | NA         |
| Acss3        | 0.66961629 | -0.0702154 | 0.18233636 | -0.3850872 | 0.70017283 | NA         |
| Abcc9        | 0.66961629 | -0.0702154 | 0.18233636 | -0.3850872 | 0.70017283 | NA         |
| Mir5136      | 0.66961629 | -0.0702154 | 0.18233636 | -0.3850872 | 0.70017283 | NA         |
| Paxbp1       | 6183.66988 | -0.0702209 | 0.17929249 | -0.3916553 | 0.69531289 | 0.87541586 |
| Dnm3         | 1.44694031 | -0.0703268 | 0.31034373 | -0.2266093 | 0.82072755 | NA         |
| 1300002E11F  | 761.32632  | -0.0703912 | 0.20001956 | -0.3519216 | 0.7248971  | 0.88888368 |
| Cage1        | 14.7742118 | -0.0704079 | 0.43098837 | -0.1633637 | 0.87023208 | 0.94998715 |
| Fam76a       | 3192.30319 | -0.0704171 | 0.14767098 | -0.4768511 | 0.63346817 | 0.83888815 |
| Zfp518b      | 6597.29039 | -0.0704439 | 0.24020875 | -0.2932613 | 0.7693224  | 0.90764437 |
| Gm10785      | 2.11170288 | -0.0704449 | 0.34035784 | -0.206973  | 0.83603095 | NA         |
| 4930546K05F  | 1.72981479 | -0.0705575 | 0.19876913 | -0.3549724 | 0.7226103  | NA         |
| Gm19434      | 0.67236936 | -0.0707011 | 0.18256536 | -0.3872644 | 0.69856047 | NA         |
| Dhcr24       | 9702.41845 | -0.0708152 | 0.22875372 | -0.3095694 | 0.75688841 | 0.90291283 |
| Sypl         | 4297.25585 | -0.0709008 | 0.17626945 | -0.4022298 | 0.68751489 | 0.87088718 |
| Mageb16-ps1  | 1.67540448 | -0.0709325 | 0.26038997 | -0.2724087 | 0.78530778 | NA         |
| AI506816     | 128.060291 | -0.0709572 | 0.35009754 | -0.2026784 | 0.8393864  | 0.93861349 |
| Setdb2       | 1435.4044  | -0.0711404 | 0.19410275 | -0.3665092 | 0.71398516 | 0.88425449 |
| Hspb8        | 7825.84473 | -0.0711656 | 0.20881922 | -0.3408    | 0.73325417 | 0.892514   |
| Pkd1l2       | 309.948863 | -0.0712416 | 0.40218182 | -0.1771379 | 0.85940008 | 0.9455234  |
| Msx1         | 44.1578228 | -0.071255  | 0.38635737 | -0.1844276 | 0.85367803 | 0.94431772 |
| Med20        | 2627.3509  | -0.0712875 | 0.18556316 | -0.3841682 | 0.70085375 | 0.87785127 |
| Got1         | 13576.8137 | -0.0712915 | 0.19533013 | -0.3649797 | 0.71512654 | 0.88470138 |
| Nfam1        | 211.815006 | -0.0713516 | 0.40169018 | -0.1776285 | 0.85901471 | 0.9455234  |
| Snord67      | 1.05695599 | -0.0713654 | 0.20640078 | -0.3457613 | 0.72952213 | NA         |
| Gjc3         | 1.05695599 | -0.0713654 | 0.20640078 | -0.3457613 | 0.72952213 | NA         |
| Psm1         | 17965.9398 | -0.0714252 | 0.17966085 | -0.3975557 | 0.6909577  | 0.87365931 |
| Mir421       | 0.68729487 | -0.0714375 | 0.17897629 | -0.399145  | 0.68978634 | NA         |
| Gm3264       | 0.68729487 | -0.0714375 | 0.17897629 | -0.399145  | 0.68978634 | NA         |
| Jmjd7-pla2g4 | 2.42273673 | -0.071477  | 0.32793254 | -0.2179625 | 0.8274583  | NA         |
| Nif3l1       | 3781.91695 | -0.0714902 | 0.18402974 | -0.3884711 | 0.69766745 | 0.87645821 |
| Amz2         | 2315.2454  | -0.0715035 | 0.1987541  | -0.3597584 | 0.7190278  | 0.88576059 |

|             |            |            |            |            |            |            |
|-------------|------------|------------|------------|------------|------------|------------|
| Lsm1        | 2520.82597 | -0.0715041 | 0.22608626 | -0.3162693 | 0.75179813 | 0.90161989 |
| Slc12a6     | 4939.02913 | -0.0715333 | 0.23922194 | -0.2990247 | 0.76492123 | 0.90610594 |
| Slc35f1     | 21.5973464 | -0.0716151 | 0.42891428 | -0.1669683 | 0.86739497 | 0.94885053 |
| Gstm4       | 746.397795 | -0.071764  | 0.2242189  | -0.3200623 | 0.74892111 | 0.90080224 |
| Hist4h4     | 3.42916764 | -0.0717797 | 0.37796684 | -0.1899101 | 0.84937957 | NA         |
| Mir210      | 0.66246055 | -0.0718055 | 0.18188563 | -0.3947837 | 0.69300255 | NA         |
| Slc34a3     | 108.325031 | -0.0718259 | 0.31059087 | -0.2312557 | 0.81711616 | 0.93016422 |
| Gpr108      | 1464.33017 | -0.0718933 | 0.21899798 | -0.3282828 | 0.74269784 | 0.89701854 |
| Rfpl3s      | 2.87481777 | -0.0719781 | 0.33165771 | -0.2170253 | 0.82818863 | NA         |
| D430036J16F | 2.24644794 | -0.0719786 | 0.30954396 | -0.2325311 | 0.8161255  | NA         |
| Msx3        | 16.1693684 | -0.0719958 | 0.42150979 | -0.1708045 | 0.86437747 | 0.94728217 |
| Zfp456      | 389.89647  | -0.072084  | 0.2519493  | -0.2861053 | 0.77479746 | 0.91029675 |
| Speer9-ps1  | 0.66521362 | -0.0722921 | 0.18211781 | -0.3969525 | 0.69140252 | NA         |
| 2210018M11  | 3361.01726 | -0.0723192 | 0.17220869 | -0.4199509 | 0.67452135 | 0.86375836 |
| Sdc2        | 2474.87667 | -0.072357  | 0.38491386 | -0.1879823 | 0.85089055 | 0.94333777 |
| Mageb16     | 514.310031 | -0.0724076 | 0.31121977 | -0.2326575 | 0.81602733 | 0.92967334 |
| Tmem186     | 1903.38993 | -0.0724589 | 0.17985469 | -0.4028747 | 0.68704039 | 0.87068415 |
| Maz         | 11925.3942 | -0.072505  | 0.17917091 | -0.4046695 | 0.68572047 | 0.87013519 |
| Fbxl21      | 52.85464   | -0.0725079 | 0.36276777 | -0.1998743 | 0.8415789  | 0.93957883 |
| Catsper3    | 6.00892235 | -0.0725252 | 0.41749353 | -0.1737157 | 0.86208887 | 0.9462518  |
| St6galnac4  | 655.974411 | -0.0725638 | 0.20719261 | -0.3502239 | 0.72617071 | 0.8894676  |
| Rbm12       | 5663.11411 | -0.0726128 | 0.18608639 | -0.3902099 | 0.69638131 | 0.87602538 |
| Tmem184a    | 83.7425766 | -0.0726178 | 0.35223561 | -0.2061626 | 0.83666389 | 0.93698697 |
| Tial1       | 6262.18246 | -0.0726595 | 0.1543628  | -0.4707058 | 0.63785085 | 0.84137221 |
| 4930519F09F | 2.17997363 | -0.0726783 | 0.34237649 | -0.2122758 | 0.83189184 | NA         |
| Chst3       | 940.291704 | -0.0727824 | 0.30991974 | -0.2348427 | 0.81433079 | 0.92878688 |
| Mapkap1     | 2683.86741 | -0.0728271 | 0.15320144 | -0.475368  | 0.63452473 | 0.83934241 |
| Vmn2r1      | 10.6356518 | -0.072856  | 0.43048684 | -0.1692408 | 0.8656072  | 0.94808387 |
| Mfsd5       | 2253.24115 | -0.0728823 | 0.17841488 | -0.4084989 | 0.68290744 | 0.86820582 |
| 1810010D01I | 4.07625162 | -0.0729132 | 0.39669547 | -0.1838013 | 0.8541693  | NA         |
| Pih1d1      | 2472.61245 | -0.0729683 | 0.20336411 | -0.3588064 | 0.71973994 | 0.88592422 |
| Rpn1        | 19326.3796 | -0.0730229 | 0.15883554 | -0.459739  | 0.64570358 | 0.84644157 |
| Bod1        | 3561.54622 | -0.0730243 | 0.21180425 | -0.3447728 | 0.73026516 | 0.89069439 |
| Fbxo8       | 1700.05461 | -0.0730423 | 0.19977681 | -0.3656194 | 0.7146491  | 0.88441096 |
| Abi2        | 3202.67087 | -0.0731763 | 0.21663771 | -0.3377821 | 0.73552739 | 0.89343006 |
| Gm2109      | 1.7990931  | -0.0732696 | 0.23822287 | -0.3075673 | 0.7584116  | NA         |
| Ackr4       | 40.1758193 | -0.0732818 | 0.4018113  | -0.1823787 | 0.85528551 | 0.94458789 |
| Nos1ap      | 28.8391067 | -0.073286  | 0.42964038 | -0.1705751 | 0.86455786 | 0.94734635 |
| Abcd3       | 4882.40448 | -0.073299  | 0.17917094 | -0.4091007 | 0.68246575 | 0.86792811 |
| Clec16a     | 1115.67001 | -0.0734476 | 0.23751433 | -0.3092346 | 0.75714308 | 0.90301693 |
| Ccdc138     | 958.445788 | -0.0734483 | 0.18560757 | -0.3957183 | 0.69231288 | 0.87437323 |



|          |            |            |            |            |            |            |
|----------|------------|------------|------------|------------|------------|------------|
| Siva1    | 3959.70723 | -0.0735265 | 0.20536111 | -0.358035  | 0.7203171  | 0.88634683 |
| Plekhg3  | 3867.02565 | -0.0735381 | 0.19781514 | -0.3717516 | 0.71007781 | 0.88195802 |
| Sdf2     | 1757.43508 | -0.0735591 | 0.23596762 | -0.3117341 | 0.75524264 | 0.90191816 |
| Tnxb     | 2.49938518 | -0.073696  | 0.32056016 | -0.2298976 | 0.81817135 | NA         |
| Tmem167b | 2471.03547 | -0.0736984 | 0.16745012 | -0.4401217 | 0.65984899 | 0.85468197 |
| Tmcc2    | 631.77784  | -0.0737924 | 0.31261411 | -0.2360496 | 0.81339417 | 0.92878688 |
| Car14    | 10.2815396 | -0.0738766 | 0.42712962 | -0.1729607 | 0.86268236 | 0.94669207 |
| Kdelr2   | 6022.66985 | -0.074034  | 0.14295699 | -0.5178764 | 0.60454452 | 0.8233008  |
| Pou3f4   | 1.87425426 | -0.0740427 | 0.23348428 | -0.3171205 | 0.75115214 | NA         |
| Mir7081  | 1.27326385 | -0.0741528 | 0.24737323 | -0.2997609 | 0.76435954 | NA         |
| Cfp      | 783.513258 | -0.0742191 | 0.28022361 | -0.2648568 | 0.79111979 | 0.91829081 |
| Snhg3    | 3239.95444 | -0.0742637 | 0.19388728 | -0.3830252 | 0.70170104 | 0.87845379 |
| Mitd1    | 1885.77143 | -0.0742659 | 0.16431659 | -0.4519686 | 0.65129162 | 0.84947044 |
| Clip4    | 1151.66915 | -0.0743005 | 0.17738039 | -0.4188767 | 0.67530624 | 0.86422417 |
| Herc4    | 12480.9713 | -0.0744176 | 0.17083733 | -0.4356049 | 0.66312342 | 0.85645621 |
| Arhgap35 | 7150.68149 | -0.0744304 | 0.2480504  | -0.3000617 | 0.76413012 | 0.90571551 |
| Atp6v0c  | 0.75243517 | -0.0745141 | 0.1797638  | -0.4145113 | 0.67849972 | NA         |
| Hspa14   | 11040.5873 | -0.0745376 | 0.1428057  | -0.5219511 | 0.60170441 | 0.82168861 |
| Chst11   | 493.288651 | -0.0745459 | 0.42297826 | -0.1762405 | 0.86010498 | 0.9455234  |
| Gm14164  | 35.7588143 | -0.0745642 | 0.4253049  | -0.1753193 | 0.86082873 | 0.94567701 |
| Dusp16   | 3288.34826 | -0.074591  | 0.20931223 | -0.3563625 | 0.72156911 | 0.88692345 |
| Lrrc10   | 3.96460725 | -0.0746023 | 0.37150132 | -0.2008131 | 0.84084474 | NA         |
| Kif1c    | 3018.91369 | -0.0746226 | 0.19967708 | -0.3737163 | 0.70861538 | 0.88125982 |
| Sub1     | 20548.0057 | -0.0746255 | 0.18919481 | -0.3944374 | 0.69325815 | 0.87464364 |
| Nkx2-2os | 0.64991072 | -0.0746892 | 0.18108566 | -0.4124521 | 0.68000805 | NA         |
| Slc8a3   | 19.6405695 | -0.0747395 | 0.41889267 | -0.1784217 | 0.85839184 | 0.9455234  |
| Dnaja3   | 6416.8613  | -0.0748189 | 0.16048624 | -0.4662012 | 0.64107148 | 0.84343093 |
| Zfr2     | 36.3177974 | -0.0748452 | 0.42771293 | -0.1749894 | 0.86108797 | 0.94574328 |
| Zfp251   | 921.985748 | -0.074862  | 0.19492927 | -0.3840472 | 0.70094346 | 0.87785127 |
| Rnasel   | 19.5336169 | -0.0748655 | 0.43222287 | -0.1732105 | 0.862486   | 0.94654339 |
| Ncbp1    | 11440.6623 | -0.0748922 | 0.14202323 | -0.5273237 | 0.59796882 | 0.81984777 |
| Wibg     | 4197.57448 | -0.0749655 | 0.19947421 | -0.3758153 | 0.7070542  | 0.88082991 |
| Pqbp1    | 2704.15832 | -0.0750015 | 0.2154839  | -0.3480609 | 0.72779448 | 0.88986097 |
| BC052688 | 1630.29221 | -0.075022  | 0.40170312 | -0.1867598 | 0.85184899 | 0.94377272 |
| Pdgfd    | 2.12171405 | -0.0750499 | 0.27160314 | -0.2763218 | 0.78230094 | NA         |
| G6bos    | 0.65266379 | -0.0751776 | 0.18132363 | -0.4146046 | 0.6784314  | NA         |
| Fut2     | 267.090098 | -0.0751931 | 0.39260364 | -0.1915243 | NA         | NA         |
| Tmem100  | 2.29285794 | -0.0752051 | 0.24865511 | -0.3024473 | 0.76231114 | NA         |
| Best2    | 16.8936606 | -0.0752137 | 0.42262722 | -0.177967  | 0.85874888 | 0.9455234  |
| Adap2    | 506.637917 | -0.0752282 | 0.24889502 | -0.3022487 | 0.76246249 | 0.90498047 |
| Sox10    | 4.30509608 | -0.0752818 | 0.37634437 | -0.2000342 | 0.84145382 | NA         |

|             |            |            |            |            |            |            |
|-------------|------------|------------|------------|------------|------------|------------|
| Usp6nl      | 1979.69303 | -0.0753197 | 0.2311267  | -0.3258807 | 0.7445146  | 0.89814184 |
| 4930425O10l | 1.26786976 | -0.0753445 | 0.24724389 | -0.3047374 | 0.76056614 | NA         |
| Pdzk1ip1    | 33.1066701 | -0.0753494 | 0.4315358  | -0.1746075 | 0.86138802 | 0.94590329 |
| Wtap        | 11395.6667 | -0.0753735 | 0.15524034 | -0.4855277 | 0.62730207 | 0.83506031 |
| Plscr3      | 834.493414 | -0.0754065 | 0.21072499 | -0.3578433 | 0.72046057 | 0.88638309 |
| Slc25a32    | 1422.55279 | -0.0754631 | 0.1755183  | -0.4299442 | 0.66723622 | 0.85915695 |
| Cep63       | 1731.45778 | -0.0754855 | 0.17485107 | -0.4317129 | 0.66595011 | 0.85847983 |
| Gm8709      | 4.40534144 | -0.0755234 | 0.3883404  | -0.1944774 | 0.84580211 | NA         |
| Erich4      | 1.34704074 | -0.0755795 | 0.249567   | -0.3028426 | 0.76200979 | NA         |
| Clec4a1     | 160.745012 | -0.0755991 | 0.38785774 | -0.1949144 | 0.84545994 | 0.94147896 |
| Klhl8       | 2086.08235 | -0.0756863 | 0.17613058 | -0.4297172 | 0.6674014  | 0.85916281 |
| Tmf1        | 3226.51967 | -0.075691  | 0.20259231 | -0.3736124 | 0.70869272 | 0.88125982 |
| Denr        | 8185.4004  | -0.0757058 | 0.18347349 | -0.4126253 | 0.67988115 | 0.86642486 |
| Smad5       | 2535.14251 | -0.0757119 | 0.1925305  | -0.3932461 | 0.69413773 | 0.87496374 |
| Rnf43       | 42.0736744 | -0.0757235 | 0.43126148 | -0.175586  | 0.86061917 | 0.94567701 |
| Mir1894     | 7.88829809 | -0.0757774 | 0.42973822 | -0.1763339 | 0.86003161 | 0.9455234  |
| Med25       | 3976.7752  | -0.0758395 | 0.21213586 | -0.3575045 | 0.72071415 | 0.8865548  |
| Coro1b      | 8437.77253 | -0.0759134 | 0.22793817 | -0.3330437 | 0.73910128 | 0.89494387 |
| Haus6       | 5186.73435 | -0.0759416 | 0.2164794  | -0.3508027 | 0.72573634 | 0.88928462 |
| Sav1        | 2198.11331 | -0.0759456 | 0.20352876 | -0.3731441 | 0.70904121 | 0.88153317 |
| Rbm48       | 1696.30598 | -0.0760202 | 0.17534064 | -0.4335574 | 0.66460986 | 0.85727836 |
| Mmadhc      | 3606.50904 | -0.0760371 | 0.15628872 | -0.4865168 | 0.62660077 | 0.83469537 |
| BC065397    | 388.80579  | -0.0760957 | 0.23892761 | -0.3184886 | 0.75011435 | 0.90092664 |
| Bloc1s5     | 685.657216 | -0.0761148 | 0.19257005 | -0.3952577 | 0.6926527  | 0.8746012  |
| 4930417O13l | 1.50365265 | -0.0761564 | 0.31133562 | -0.244612  | 0.80675685 | NA         |
| Usp54       | 2771.48398 | -0.0761888 | 0.23164624 | -0.3289016 | 0.74223005 | 0.8968469  |
| Abcd4       | 2488.53638 | -0.0763973 | 0.20138143 | -0.3793659 | 0.70441616 | 0.87942876 |
| Pom121      | 4202.79279 | -0.0764133 | 0.24981882 | -0.305875  | 0.75969979 | 0.9039387  |
| Mogs        | 3643.22722 | -0.0764462 | 0.22012127 | -0.3472913 | 0.72837249 | 0.8900505  |
| Prss34      | 0.71102573 | -0.0765129 | 0.18563076 | -0.4121778 | 0.68020909 | NA         |
| Ptrhd1      | 717.962718 | -0.0765386 | 0.20424245 | -0.3747437 | 0.70785111 | 0.88112271 |
| Myo10       | 22317.1097 | -0.0765441 | 0.19817618 | -0.3862424 | 0.69931712 | 0.87735184 |
| Coq9        | 2792.36256 | -0.0765521 | 0.15669783 | -0.4885331 | 0.62517228 | 0.8338669  |
| Ola1        | 11194.1265 | -0.0767304 | 0.16122341 | -0.4759258 | 0.63412724 | 0.83926065 |
| Dnajc17     | 813.87535  | -0.0767412 | 0.19635538 | -0.3908282 | 0.69592422 | 0.87573374 |
| Nop14       | 9159.16971 | -0.0767634 | 0.16119689 | -0.4762092 | 0.63392532 | 0.83920768 |
| Edn3        | 1.08202086 | -0.0767822 | 0.20596969 | -0.372784  | 0.70930918 | NA         |
| Tbca        | 4470.93846 | -0.076823  | 0.20188687 | -0.3805251 | 0.70355564 | 0.87928906 |
| Gm15408     | 8.25936756 | -0.0768958 | 0.41185108 | -0.1867078 | 0.85188976 | 0.94377272 |
| Mcm3ap      | 16900.3798 | -0.0769473 | 0.23031876 | -0.3340905 | 0.73831124 | 0.8945646  |
| Ces1b       | 0.7137788  | -0.0769808 | 0.18584311 | -0.4142247 | 0.67870953 | NA         |

|             |            |            |            |            |            |            |
|-------------|------------|------------|------------|------------|------------|------------|
| Bud13       | 1795.96874 | -0.0770134 | 0.20992876 | -0.366855  | 0.71372717 | 0.88418475 |
| Esp8        | 2.24749688 | -0.0771094 | 0.21065511 | -0.3660459 | 0.71433085 | NA         |
| Idi2        | 1.85278703 | -0.0771286 | 0.23322783 | -0.3307008 | 0.74087048 | NA         |
| Tbk1        | 3185.53356 | -0.0771466 | 0.19458513 | -0.3964669 | 0.6917606  | 0.87409602 |
| Utp20       | 14625.2503 | -0.0775375 | 0.26871888 | -0.2885451 | 0.7729295  | 0.90962818 |
| Tti1        | 4190.97044 | -0.0776332 | 0.1724299  | -0.4502308 | 0.65254405 | 0.85045295 |
| Tardbp      | 40735.0728 | -0.077693  | 0.18404589 | -0.4221391 | 0.67292346 | 0.86279388 |
| Dcaf4       | 4806.00027 | -0.0777516 | 0.23849167 | -0.3260137 | 0.74441395 | 0.8980901  |
| Slc22a16    | 4.11942271 | -0.077789  | 0.39488682 | -0.1969907 | 0.84383478 | NA         |
| Tshz3       | 167.735706 | -0.0778339 | 0.3371849  | -0.2308346 | 0.81744329 | 0.93024054 |
| Grin2a      | 3.71299147 | -0.0778965 | 0.39059502 | -0.1994302 | 0.84192621 | NA         |
| Klhl29      | 48.2100337 | -0.0779822 | 0.42810823 | -0.1821554 | 0.85546076 | 0.94458789 |
| R3hcc1      | 1873.44036 | -0.078191  | 0.1997601  | -0.3914245 | 0.69548351 | 0.87541586 |
| Pgls        | 2888.01233 | -0.0781952 | 0.25205831 | -0.3102268 | 0.7563885  | 0.90259343 |
| Prdm16      | 759.288301 | -0.0781982 | 0.26234199 | -0.2980774 | 0.76564408 | 0.90618168 |
| Ftsj1       | 2075.02909 | -0.0783092 | 0.17875411 | -0.4380834 | 0.6613258  | 0.85550654 |
| Rps9        | 61114.3519 | -0.0786013 | 0.18284409 | -0.4298817 | 0.66728169 | 0.85915695 |
| Hmgxb3      | 3393.1775  | -0.0787146 | 0.18967643 | -0.4149941 | 0.67814623 | 0.86569135 |
| Gga1        | 3129.60128 | -0.0787914 | 0.18136653 | -0.4344318 | 0.66397493 | 0.85695694 |
| Gpkow       | 2013.74179 | -0.0788086 | 0.17032489 | -0.4626958 | 0.64358241 | 0.84499536 |
| Adnp2       | 4643.83659 | -0.0788088 | 0.21146331 | -0.3726833 | 0.70938418 | 0.8816794  |
| Creb3l4     | 163.221734 | -0.0788713 | 0.38124742 | -0.2068769 | 0.83610603 | 0.93697364 |
| Atp2a3      | 1964.71802 | -0.0789503 | 0.32794109 | -0.2407455 | 0.80975238 | 0.92748171 |
| Rplp2       | 51057.2568 | -0.0789784 | 0.18671943 | -0.4229793 | 0.67231038 | 0.86227619 |
| Chst8       | 176.582021 | -0.07899   | 0.31379976 | -0.2517209 | 0.80125682 | 0.92325551 |
| 5830417110R | 2022.88103 | -0.0789915 | 0.17103673 | -0.4618392 | 0.64419661 | 0.84545047 |
| Serpine1    | 866.311356 | -0.0789965 | 0.36899001 | -0.2140884 | 0.83047816 | 0.9337556  |
| Cherp       | 9672.36739 | -0.0790477 | 0.27635228 | -0.2860397 | 0.77484772 | 0.91029675 |
| Ccdc176     | 69.9631165 | -0.0790555 | 0.34228891 | -0.2309615 | 0.81734473 | 0.93024054 |
| Fscn1       | 16332.9422 | -0.079134  | 0.30273985 | -0.2613928 | 0.79378963 | 0.91974128 |
| Dgcr14      | 1571.10764 | -0.079168  | 0.1879759  | -0.4211605 | 0.67363788 | 0.86321737 |
| Rheb        | 6339.64751 | -0.0792618 | 0.17420742 | -0.4549854 | 0.64911975 | 0.84869184 |
| Fam72a      | 633.372021 | -0.079262  | 0.18507186 | -0.4282768 | 0.66844964 | 0.85987761 |
| Gabpa       | 16287.3638 | -0.0792653 | 0.18376301 | -0.4313452 | 0.66621741 | 0.8585804  |
| Adipor1     | 7664.12107 | -0.0792726 | 0.15769249 | -0.5027039 | 0.6151725  | 0.82953469 |
| Msgn1       | 3.87472243 | -0.0792986 | 0.35690074 | -0.2221866 | 0.8241686  | NA         |
| Gls         | 6852.64214 | -0.0793902 | 0.25718318 | -0.3086913 | 0.75755636 | 0.90301693 |
| Mnx1        | 66.7436224 | -0.0794866 | 0.41059053 | -0.1935909 | 0.8464962  | 0.94147896 |
| Smchd1      | 7120.95588 | -0.0795223 | 0.23146508 | -0.3435605 | 0.73117686 | 0.89152668 |
| Gpr55       | 2.08268029 | -0.0795569 | 0.27619144 | -0.2880497 | 0.77330869 | NA         |
| Dip2b       | 2040.51149 | -0.0795887 | 0.26749093 | -0.2975379 | 0.76605585 | 0.90618168 |

|             |            |            |            |            |            |            |
|-------------|------------|------------|------------|------------|------------|------------|
| Stk16       | 1922.89098 | -0.079609  | 0.21301108 | -0.3737316 | 0.70860401 | 0.88125982 |
| Slc45a3     | 549.309849 | -0.0796552 | 0.2441056  | -0.3263145 | 0.74418644 | 0.89795494 |
| Mirlet7e    | 0.94941484 | -0.0796979 | 0.23013336 | -0.3463117 | 0.72910848 | NA         |
| Mrrf        | 1287.85168 | -0.0797252 | 0.19429671 | -0.4103269 | 0.68156617 | 0.86734737 |
| lbtck       | 7353.18345 | -0.0797328 | 0.19741727 | -0.4038794 | 0.6863014  | 0.87052798 |
| Chchd10     | 14733.1247 | -0.0797504 | 0.22030426 | -0.3620011 | 0.71735121 | 0.88502651 |
| Rpl36al     | 5276.01537 | -0.0797707 | 0.19093445 | -0.4177911 | 0.67609984 | 0.864488   |
| C8g         | 161.752491 | -0.0798321 | 0.3852091  | -0.2072435 | 0.83581973 | 0.93687039 |
| Sema3c      | 52.7131585 | -0.079847  | 0.41595314 | -0.1919614 | 0.84777243 | 0.94155899 |
| Dhrs7b      | 2238.91479 | -0.0798586 | 0.2430263  | -0.3286005 | 0.74245764 | 0.8969825  |
| A830080D01  | 6674.94291 | -0.079867  | 0.15776057 | -0.5062543 | 0.61267811 | 0.82786256 |
| Srsf4       | 5192.30625 | -0.0799081 | 0.180946   | -0.441613  | 0.65876926 | 0.85401151 |
| Zp3         | 757.181809 | -0.0799278 | 0.23634132 | -0.3381878 | 0.73522165 | 0.89330666 |
| B230216N24  | 1.60675634 | -0.0800117 | 0.26400365 | -0.3030704 | 0.76183619 | NA         |
| 9530077C05F | 406.218475 | -0.0800502 | 0.40796686 | -0.1962174 | 0.84443999 | 0.94115145 |
| Asxl2       | 6103.62184 | -0.0800997 | 0.2202035  | -0.363753  | 0.71604248 | 0.88472721 |
| Zbtb46      | 289.064508 | -0.0801454 | 0.35669541 | -0.2246887 | 0.82222143 | 0.93093305 |
| Ncoa4       | 2858.68032 | -0.080222  | 0.22090745 | -0.3631474 | 0.71649479 | 0.88475417 |
| Map2k4      | 4915.16818 | -0.0802358 | 0.18961013 | -0.423162  | 0.67217705 | 0.86225846 |
| 1810043G02I | 375.791592 | -0.080354  | 0.25924953 | -0.3099483 | 0.75660027 | 0.9027453  |
| Dscc1       | 1156.96681 | -0.080376  | 0.18138749 | -0.4431179 | 0.65768049 | 0.85322343 |
| Snora30     | 5.94769461 | -0.0803941 | 0.37721267 | -0.2131266 | 0.83122821 | 0.93392312 |
| Smad4       | 4900.89451 | -0.0804977 | 0.18431328 | -0.436744  | 0.66229705 | 0.85619416 |
| Vmn2r3      | 4.00817914 | -0.0805227 | 0.30309817 | -0.2656654 | 0.79049694 | NA         |
| Atg7        | 1062.43571 | -0.0805517 | 0.19007318 | -0.4237929 | 0.67171683 | 0.86187033 |
| Emc4        | 1868.04399 | -0.0805651 | 0.20327038 | -0.3963443 | 0.69185104 | 0.87409602 |
| Usp9x       | 24674.009  | -0.080584  | 0.25695599 | -0.3136103 | 0.75381703 | 0.90191816 |
| Atraid      | 1718.62878 | -0.0805891 | 0.24175982 | -0.3333438 | 0.7388748  | 0.8948635  |
| Hnrnpab     | 51454.5758 | -0.0807457 | 0.16050759 | -0.5030647 | 0.61491882 | 0.82951097 |
| Fbxw8       | 4395.47455 | -0.0807536 | 0.18383082 | -0.4392823 | 0.66045696 | 0.85511333 |
| Srrt        | 13777.6453 | -0.0807965 | 0.19654622 | -0.4110813 | 0.68101294 | 0.86700223 |
| Stx6        | 1380.74315 | -0.0808341 | 0.18325759 | -0.4410953 | 0.65914402 | 0.85421847 |
| Cdkn2c      | 155.424395 | -0.0808672 | 0.33367229 | -0.242355  | 0.80850508 | 0.92680691 |
| Pink1       | 1063.24256 | -0.0808787 | 0.22793838 | -0.3548271 | 0.72271914 | 0.88757986 |
| Ssr3        | 24011.6813 | -0.0810595 | 0.15882571 | -0.5103678 | 0.60979378 | 0.82596491 |
| B4galnt3    | 2600.3919  | -0.0810605 | 0.27009019 | -0.3001239 | 0.76408263 | 0.90571551 |
| Megf10      | 0.69132016 | -0.0810652 | 0.18450972 | -0.4393545 | 0.66040471 | NA         |
| Pja2        | 3290.04343 | -0.0814114 | 0.21484889 | -0.3789241 | 0.70474424 | 0.87942876 |
| Bcas1os2    | 0.72595124 | -0.0814465 | 0.18691284 | -0.4357461 | 0.66302095 | NA         |
| Srsf3       | 25793.5796 | -0.0815107 | 0.17166857 | -0.4748144 | 0.63491929 | 0.83934241 |
| Hist1h3d    | 2.64809912 | -0.0815161 | 0.32525287 | -0.2506238 | 0.80210498 | NA         |

|             |            |            |            |            |            |            |
|-------------|------------|------------|------------|------------|------------|------------|
| Mir6922     | 0.69407323 | -0.0815358 | 0.18473039 | -0.4413773 | 0.65893987 | NA         |
| Zfand2b     | 754.39318  | -0.0816333 | 0.21388285 | -0.3816731 | 0.70270389 | 0.87893093 |
| Gart        | 26729.8593 | -0.0817295 | 0.20054043 | -0.4075465 | 0.68360667 | 0.86866869 |
| Ubl3        | 3197.86021 | -0.0817784 | 0.23041953 | -0.3549107 | 0.72265647 | 0.88757986 |
| Wdr46       | 3762.17472 | -0.0818529 | 0.23358874 | -0.3504146 | 0.72602759 | 0.88936235 |
| Sart3       | 7218.64548 | -0.0819969 | 0.20308564 | -0.4037552 | 0.68639276 | 0.87054555 |
| Pasma5      | 7233.11975 | -0.0820029 | 0.1620945  | -0.5058959 | 0.61292976 | 0.82804888 |
| Oxr1        | 6120.74242 | -0.0820178 | 0.20510332 | -0.3998852 | 0.68924111 | 0.87233568 |
| Dnajc14     | 3761.8976  | -0.082152  | 0.15541322 | -0.5286037 | 0.59708042 | 0.81955501 |
| Ak3         | 834.939309 | -0.082242  | 0.2533903  | -0.3245666 | 0.7455091  | 0.89871411 |
| Odf4        | 0.98404593 | -0.0822629 | 0.23419083 | -0.3512642 | 0.72539014 | NA         |
| Zfp931      | 228.683418 | -0.0823594 | 0.28451324 | -0.2894747 | 0.7722181  | 0.90946064 |
| Chmp6       | 2152.15457 | -0.0823757 | 0.22712111 | -0.3626952 | 0.71683259 | 0.88475711 |
| Ccdc154     | 6.47181313 | -0.0824673 | 0.40876383 | -0.201748  | 0.84011376 | 0.93906114 |
| 1700069L16F | 2.35318407 | -0.0824838 | 0.28715068 | -0.2872492 | 0.77392149 | NA         |
| Gosr2       | 4237.64364 | -0.0824985 | 0.21014783 | -0.3925736 | 0.69463442 | 0.87496374 |
| Galm        | 1299.78017 | -0.0825183 | 0.23770476 | -0.3471463 | 0.72848142 | 0.8900505  |
| Cldn2       | 1.59209616 | -0.0825251 | 0.28754055 | -0.2870035 | 0.77410965 | NA         |
| 4833439L19F | 6049.48367 | -0.0825458 | 0.16821189 | -0.4907248 | 0.62362108 | 0.83265488 |
| Rlbp1       | 559.152741 | -0.0825624 | 0.22690328 | -0.3638661 | 0.71595803 | 0.88472721 |
| 1810043H04I | 798.540819 | -0.0825945 | 0.25924952 | -0.3185908 | 0.7500368  | 0.90092664 |
| Caap1       | 1964.95518 | -0.0827613 | 0.20972394 | -0.3946204 | 0.69312305 | 0.87461511 |
| Zfp52       | 657.70748  | -0.0827745 | 0.1936623  | -0.4274166 | 0.66907594 | 0.86018518 |
| Snord93     | 10.5341971 | -0.0827818 | 0.42931208 | -0.1928243 | 0.84709655 | 0.94147896 |
| Aldh1a2     | 564.572171 | -0.0828386 | 0.3618972  | -0.228901  | 0.8189459  | 0.93036217 |
| Eif2ak1     | 4056.00376 | -0.0828598 | 0.19023168 | -0.4355733 | 0.66314637 | 0.85645621 |
| Lrrc66      | 2.79121185 | -0.0828745 | 0.25529671 | -0.3246204 | 0.74546836 | NA         |
| Naglu       | 199.604621 | -0.0829029 | 0.34591401 | -0.2396634 | 0.81059119 | 0.9275573  |
| Oaz1        | 5.73425255 | -0.0830007 | 0.41658605 | -0.1992401 | 0.84207492 | NA         |
| Psmc4       | 13427.3275 | -0.0830189 | 0.20219777 | -0.4105825 | 0.68137867 | 0.86734714 |
| Plek2       | 300.980922 | -0.0831339 | 0.3071483  | -0.2706637 | 0.78664971 | 0.91606931 |
| Tmc8        | 442.390088 | -0.0831413 | 0.2325042  | -0.3575906 | 0.72064972 | 0.88654567 |
| Hnrnp3      | 4086.99824 | -0.0831429 | 0.26455929 | -0.3142695 | 0.75331638 | 0.90191816 |
| Scg5        | 1.74153619 | -0.0831518 | 0.2697415  | -0.3082648 | 0.75788085 | NA         |
| Gabbr2      | 3.14762289 | -0.0831844 | 0.36341583 | -0.228896  | 0.81894973 | NA         |
| 2310022A10f | 3648.24016 | -0.0832202 | 0.17975471 | -0.4629652 | 0.64338928 | 0.84490346 |
| Neil1       | 500.371794 | -0.083221  | 0.20183219 | -0.4123276 | 0.68009933 | 0.86644421 |
| Gsdma       | 68.7868917 | -0.0832455 | 0.39738424 | -0.2094835 | 0.83407078 | 0.93583223 |
| Eif4a3      | 9569.80981 | -0.0833586 | 0.22135728 | -0.3765795 | 0.70648612 | 0.88063557 |
| Mir34a      | 0.76318855 | -0.0834193 | 0.18011433 | -0.4631462 | 0.64325959 | NA         |
| Eaf1        | 6369.5514  | -0.0835201 | 0.19671774 | -0.424568  | 0.67115165 | 0.86169074 |

|             |            |            |            |            |            |            |
|-------------|------------|------------|------------|------------|------------|------------|
| Bcl6b       | 90.875303  | -0.0836073 | 0.41911147 | -0.1994871 | 0.84188172 | 0.93972068 |
| Thtpa       | 1284.14192 | -0.0836252 | 0.16113179 | -0.5189862 | 0.60377036 | 0.82288924 |
| Gm7244      | 2.6728214  | -0.0836714 | 0.32628834 | -0.2564339 | 0.79761585 | NA         |
| 1700040L02F | 1.54230902 | -0.0836776 | 0.31203096 | -0.2681709 | 0.78856778 | NA         |
| Sc5d        | 2521.89605 | -0.0837603 | 0.19072372 | -0.4391709 | 0.66053767 | 0.85514663 |
| Tap2        | 53.5804911 | -0.0839129 | 0.37916755 | -0.2213083 | 0.82485242 | 0.9311324  |
| Eefsec      | 2404.18058 | -0.083951  | 0.21376245 | -0.3927302 | 0.69451878 | 0.87496374 |
| 1700001O22I | 229.686868 | -0.0839659 | 0.36429311 | -0.23049   | 0.817711   | 0.93032    |
| Gltscr1     | 685.044843 | -0.0839818 | 0.26813791 | -0.3132037 | 0.75412592 | 0.90191816 |
| Tia1        | 3043.4451  | -0.0840131 | 0.21619465 | -0.3885993 | 0.69757258 | 0.87645821 |
| Snora16a    | 202.264813 | -0.0840501 | 0.30000349 | -0.2801639 | 0.77935178 | 0.91262797 |
| 1700017B05F | 2441.51261 | -0.0840878 | 0.19571346 | -0.4296476 | 0.66745199 | 0.85916281 |
| Fam193a     | 3007.01349 | -0.0840938 | 0.23294392 | -0.3610046 | 0.71809605 | 0.88550762 |
| Clcc1       | 1940.844   | -0.0841054 | 0.15699815 | -0.5357097 | 0.5921592  | 0.81666085 |
| Wnt4        | 6.2292171  | -0.0841366 | 0.37897614 | -0.2220104 | 0.82430582 | 0.93107393 |
| Calm2       | 30531.8853 | -0.084216  | 0.19685915 | -0.4277983 | 0.66879796 | 0.8600411  |
| Eda         | 491.320717 | -0.0842727 | 0.27256125 | -0.3091882 | 0.75717841 | 0.90301693 |
| Ubqln4      | 13170.314  | -0.0843149 | 0.16879523 | -0.4995097 | 0.61742034 | 0.83032065 |
| Mark1       | 652.19642  | -0.0843411 | 0.30750578 | -0.2742749 | 0.78387338 | 0.91455554 |
| Mrgprg      | 2.39193635 | -0.0843594 | 0.24422384 | -0.3454186 | 0.72977973 | NA         |
| Tmem201     | 3481.59741 | -0.0843958 | 0.18529753 | -0.4554611 | 0.64877758 | 0.84862854 |
| Tk2         | 1253.98966 | -0.0844503 | 0.21694118 | -0.3892775 | 0.69707088 | 0.87645821 |
| Tmem222     | 2501.50572 | -0.0844911 | 0.21504121 | -0.3929066 | 0.6943885  | 0.87496374 |
| Ces1a       | 2.48697249 | -0.0845921 | 0.29117684 | -0.2905179 | 0.77142004 | NA         |
| Cpsf1       | 8636.3775  | -0.0846395 | 0.19308076 | -0.4383634 | 0.66112285 | 0.85541281 |
| Dedd2       | 990.117087 | -0.084665  | 0.22125238 | -0.3826624 | 0.70197009 | 0.87857842 |
| Calm1       | 21012.0331 | -0.0847604 | 0.14038218 | -0.603783  | 0.54598791 | 0.78719247 |
| Mrps15      | 3967.13777 | -0.0847689 | 0.17555148 | -0.4828722 | 0.62918649 | 0.83631803 |
| Epm2aip1    | 3642.39156 | -0.0848109 | 0.24181402 | -0.3507278 | 0.72579258 | 0.88928462 |
| Srrm4       | 94.1461039 | -0.0849114 | 0.29757215 | -0.2853471 | 0.77537822 | 0.91030389 |
| Ctif        | 882.509414 | -0.0849712 | 0.29212674 | -0.2908711 | 0.77114987 | 0.90875167 |
| Pycrl       | 1523.06999 | -0.0854404 | 0.22229512 | -0.3843559 | 0.70071466 | 0.87785127 |
| Saal1       | 5185.93703 | -0.0854593 | 0.20571403 | -0.4154276 | 0.67782894 | 0.86555439 |
| Tmem91      | 47.1512989 | -0.0855996 | 0.41583816 | -0.2058482 | 0.83690946 | 0.93707333 |
| Kctd21      | 219.426223 | -0.0856594 | 0.29784443 | -0.2875978 | 0.77365461 | 0.9098882  |
| A330049N07  | 1.08439655 | -0.0857548 | 0.20930556 | -0.4097112 | 0.68201783 | NA         |
| Atp5o       | 18984.0779 | -0.0857774 | 0.18747851 | -0.4575322 | 0.64728859 | 0.84773328 |
| Slc9a9      | 1.59170263 | -0.0858547 | 0.23056705 | -0.3723634 | 0.70962232 | NA         |
| Zbtb6       | 1703.87948 | -0.0858718 | 0.20394126 | -0.4210613 | 0.67371032 | 0.86321737 |
| Cyb5r2      | 157.649777 | -0.0858859 | 0.33849847 | -0.2537261 | 0.79970714 | 0.92229648 |
| Edem3       | 4378.31773 | -0.085899  | 0.22770685 | -0.377235  | 0.70599896 | 0.88029104 |

|             |            |            |            |            |            |            |
|-------------|------------|------------|------------|------------|------------|------------|
| Atp5sl      | 2051.7327  | -0.0859095 | 0.18794984 | -0.4570873 | 0.64760832 | 0.84806214 |
| Wdr12       | 8289.00441 | -0.0859384 | 0.15253392 | -0.563405  | 0.57315916 | 0.80618651 |
| Gm10863     | 66.3759077 | -0.0860102 | 0.42298988 | -0.2033387 | 0.83887028 | 0.93836543 |
| 2810001G20I | 235.301979 | -0.086088  | 0.26214698 | -0.3283959 | 0.74261237 | 0.89701854 |
| Tpgs2       | 1793.09561 | -0.0861084 | 0.18441491 | -0.4669276 | 0.64055171 | 0.84302806 |
| Atp1a2      | 177.911582 | -0.0861601 | 0.38545587 | -0.2235278 | 0.82312477 | 0.93107393 |
| Kif13b      | 3244.02497 | -0.0861952 | 0.26995416 | -0.3192956 | 0.74950236 | 0.90084943 |
| Senp2       | 7296.15548 | -0.0862612 | 0.17607766 | -0.4899041 | 0.62420179 | 0.83307261 |
| Apobec1     | 1357.17453 | -0.0862655 | 0.29139144 | -0.2960469 | 0.76719426 | 0.90649963 |
| Jazf1       | 19.1606106 | -0.0863859 | 0.42189009 | -0.2047592 | 0.83776024 | 0.93751696 |
| Mir7647     | 1.62760593 | -0.0864206 | 0.22793769 | -0.3791415 | 0.70458277 | NA         |
| R3hdml      | 9.9393136  | -0.0865383 | 0.43004231 | -0.201232  | 0.84051717 | 0.93927008 |
| Papln       | 39.6611266 | -0.0865395 | 0.36823234 | -0.2350134 | 0.81419834 | 0.92878688 |
| Znfx1       | 2203.12874 | -0.0865405 | 0.23631418 | -0.3662096 | 0.71420866 | 0.88425449 |
| Gbp3        | 2.34078108 | -0.0865476 | 0.30456554 | -0.2841673 | 0.77628218 | NA         |
| BC017643    | 1464.48383 | -0.08662   | 0.19402714 | -0.4464324 | 0.65528492 | 0.85234189 |
| Ids         | 1085.28397 | -0.0866268 | 0.26178501 | -0.3309081 | 0.74071389 | 0.89591987 |
| Rnf8        | 3180.97426 | -0.0866974 | 0.17524464 | -0.4947224 | 0.62079612 | 0.83166786 |
| Nckap1      | 14497.6236 | -0.0867807 | 0.17782194 | -0.4880199 | 0.62553572 | 0.83406551 |
| lldr1       | 4555.39455 | -0.0868022 | 0.25530154 | -0.3399988 | 0.7338574  | 0.892514   |
| Lrrc25      | 6.86698441 | -0.0868221 | 0.39724348 | -0.2185613 | 0.82699179 | 0.93192387 |
| 2410089E03F | 2747.13625 | -0.0868856 | 0.24264928 | -0.3580706 | 0.72029051 | 0.88634683 |
| Cad         | 28431.9913 | -0.0868876 | 0.22991841 | -0.3779064 | 0.70550009 | 0.87995123 |
| Spem1       | 1.94077949 | -0.0869668 | 0.30404986 | -0.2860281 | 0.77485663 | NA         |
| Chadl       | 196.18592  | -0.0870291 | 0.32428749 | -0.2683702 | 0.78841441 | 0.91719581 |
| Setd4       | 746.989231 | -0.0870365 | 0.25709256 | -0.3385415 | 0.73495513 | 0.89326199 |
| Dnal4       | 862.481512 | -0.0870419 | 0.22054088 | -0.3946749 | 0.69308284 | 0.87461511 |
| Galnt2      | 7682.84112 | -0.0871537 | 0.20254011 | -0.4303034 | 0.66697495 | 0.85904649 |
| Spatc1l     | 0.99621837 | -0.0871999 | 0.23491674 | -0.3711949 | 0.7104924  | NA         |
| A630077J23R | 1.44976705 | -0.0872455 | 0.22704557 | -0.3842642 | 0.70078264 | NA         |
| Ly6g6f      | 1.20497696 | -0.0872696 | 0.21107703 | -0.4134488 | 0.6792778  | NA         |
| Smim8       | 1418.68527 | -0.0872898 | 0.24790102 | -0.3521155 | 0.72475166 | 0.88879488 |
| Tulp3       | 5450.84026 | -0.0872928 | 0.20278748 | -0.4304646 | 0.66685769 | 0.85903777 |
| 1700019L03F | 10.974481  | -0.0873106 | 0.41891871 | -0.2084191 | 0.83490178 | 0.93631091 |
| Shoc2       | 4688.53724 | -0.0873318 | 0.19564669 | -0.4463752 | 0.65532628 | 0.85234189 |
| Foxn4       | 183.857943 | -0.0876426 | 0.42469239 | -0.2063674 | 0.83650396 | 0.93698697 |
| Aldh1a7     | 2.30002982 | -0.0876603 | 0.31863872 | -0.2751088 | 0.78323267 | NA         |
| Traf7       | 7843.85003 | -0.0876673 | 0.17571123 | -0.4989282 | 0.61782994 | 0.83032275 |
| 9-Mar       | 620.494117 | -0.0876804 | 0.22315438 | -0.3929135 | 0.69438339 | 0.87496374 |
| Tbl3        | 6709.24513 | -0.0876866 | 0.17913135 | -0.4895102 | 0.62448051 | 0.8333359  |
| Klhl21      | 1977.86809 | -0.0876977 | 0.19705987 | -0.4450309 | 0.65629745 | 0.85271673 |

|             |            |            |            |            |            |            |
|-------------|------------|------------|------------|------------|------------|------------|
| Mtrf1       | 884.641075 | -0.0877657 | 0.18686651 | -0.4696704 | 0.6385905  | 0.84187189 |
| Tet2        | 8575.43505 | -0.0878009 | 0.20898167 | -0.4201369 | 0.67438544 | 0.86375836 |
| Ypel1       | 391.693846 | -0.0878746 | 0.27800404 | -0.3160911 | 0.75193339 | 0.90163592 |
| Synpo2      | 28.7031874 | -0.0878904 | 0.42028698 | -0.2091201 | 0.83435451 | 0.93601076 |
| Nlk         | 3936.9152  | -0.087896  | 0.20049814 | -0.4383882 | 0.66110488 | 0.85541281 |
| Ppp1r16a    | 1549.08505 | -0.0880098 | 0.22543459 | -0.3904006 | 0.69624034 | 0.87598977 |
| Klhdc8b     | 270.775947 | -0.0880245 | 0.23840944 | -0.3692157 | 0.71196696 | 0.88334116 |
| Ttc7b       | 3860.96214 | -0.0881046 | 0.15889325 | -0.554489  | 0.57924426 | 0.80819076 |
| Etv3        | 1720.08557 | -0.0881612 | 0.20786897 | -0.4241191 | 0.67147897 | 0.86170733 |
| Coq6        | 2086.61148 | -0.0881782 | 0.16319868 | -0.5403119 | 0.58898193 | 0.81437343 |
| Prdm8       | 5.82810561 | -0.0882035 | 0.39463754 | -0.223505  | 0.8231425  | NA         |
| Rbbp7       | 18756.9915 | -0.0882397 | 0.20590668 | -0.4285422 | 0.6682564  | 0.85977126 |
| Poldip2     | 6909.8355  | -0.0884088 | 0.17332624 | -0.5100719 | 0.61000112 | 0.82596711 |
| Rnf166      | 786.160531 | -0.0884178 | 0.23298025 | -0.3795078 | 0.70431081 | 0.87942876 |
| Zfp963      | 278.520427 | -0.0884574 | 0.25344159 | -0.3490248 | 0.7270707  | 0.88958902 |
| Slc8a1      | 29.1748106 | -0.0884994 | 0.432011   | -0.2048546 | 0.83768572 | 0.93751696 |
| Wasl        | 5004.44226 | -0.088564  | 0.21485103 | -0.4122112 | 0.68018461 | 0.86644421 |
| Nphp3       | 1337.49123 | -0.088603  | 0.19084323 | -0.464271  | 0.64245361 | 0.84424506 |
| Ube2q1      | 8012.80221 | -0.0888138 | 0.15041105 | -0.5904739 | 0.55487298 | 0.7941128  |
| Pls3        | 6700.83339 | -0.0888415 | 0.23123971 | -0.3841964 | 0.70083292 | 0.87785127 |
| Mir301b     | 0.98642161 | -0.0888425 | 0.23215773 | -0.3826818 | 0.70195569 | NA         |
| C330013F16F | 301.373705 | -0.0889164 | 0.23684463 | -0.3754207 | 0.70734761 | 0.88105428 |
| Lingo1      | 220.897274 | -0.0890256 | 0.36421954 | -0.2444284 | 0.80689901 | 0.92559319 |
| Becn1       | 5471.71679 | -0.0890812 | 0.18261628 | -0.4878052 | 0.62568781 | 0.83419677 |
| Scaf1       | 5341.87245 | -0.0891076 | 0.20108999 | -0.4431232 | 0.65767662 | 0.85322343 |
| Aen         | 5053.68599 | -0.0891455 | 0.1745293  | -0.5107764 | 0.6095076  | 0.82596491 |
| Atp13a5     | 0.85151357 | -0.0891824 | 0.1809783  | -0.4927798 | 0.62216822 | NA         |
| Dnah5       | 14.5211751 | -0.0891869 | 0.43175393 | -0.2065689 | 0.83634656 | 0.93698697 |
| Ogfod2      | 348.210388 | -0.0892804 | 0.3012455  | -0.296371  | 0.76694675 | 0.90649963 |
| Styx        | 361.702845 | -0.0892952 | 0.20036234 | -0.4456684 | 0.6558368  | 0.85260978 |
| Slc40a1     | 43.8980084 | -0.0893203 | 0.43225224 | -0.2066393 | 0.83629159 | 0.93698697 |
| Sltm        | 9047.27766 | -0.0893799 | 0.18650859 | -0.4792266 | 0.63177741 | 0.8377965  |
| Xpo6        | 8417.33384 | -0.0894197 | 0.21616045 | -0.4136727 | 0.67911379 | 0.86604267 |
| Prpf18      | 3871.3588  | -0.0894374 | 0.16183007 | -0.5526622 | 0.58049475 | 0.80865954 |
| Kirrel      | 4639.49383 | -0.0894502 | 0.27966491 | -0.3198479 | 0.74908361 | 0.90084943 |
| L2hgdh      | 4426.19922 | -0.0894827 | 0.17118104 | -0.5227372 | 0.60115712 | 0.82154763 |
| Efna4       | 1011.69098 | -0.0894884 | 0.25980267 | -0.3444477 | 0.73050965 | 0.89091255 |
| Prkar2a     | 6804.92675 | -0.0896302 | 0.20347818 | -0.4404903 | 0.65958203 | 0.854457   |
| 4930527F14F | 1.19242713 | -0.0896823 | 0.21079197 | -0.4254539 | 0.67050581 | NA         |
| Atp5a1      | 103072.159 | -0.0896871 | 0.17129977 | -0.5235679 | 0.60057915 | 0.82128089 |
| Zfp454      | 563.250827 | -0.0897445 | 0.25693799 | -0.3492846 | 0.72687563 | 0.88950684 |



|             |            |            |            |            |            |            |
|-------------|------------|------------|------------|------------|------------|------------|
| Mib2        | 2756.07391 | -0.0897815 | 0.21158117 | -0.424336  | 0.67132081 | 0.86169525 |
| Ptcd3       | 11557.7327 | -0.0897908 | 0.16317781 | -0.5502637 | 0.58213853 | 0.81000763 |
| Sox13       | 2347.35923 | -0.0897992 | 0.23656098 | -0.3796027 | 0.70424035 | 0.87942876 |
| Spata20     | 14.853177  | -0.0898223 | 0.42623796 | -0.2107328 | 0.83309577 | 0.93520508 |
| Kcnk10      | 2.01830663 | -0.0898669 | 0.2442216  | -0.3679729 | 0.71289347 | NA         |
| Senp5       | 2705.77753 | -0.0899039 | 0.19827453 | -0.4534314 | 0.65023816 | 0.84900546 |
| Vangl1      | 5197.96353 | -0.0899549 | 0.1619027  | -0.555611  | 0.57847682 | 0.80782085 |
| Polb        | 2228.67152 | -0.089956  | 0.20470231 | -0.4394477 | 0.66033721 | 0.85504245 |
| Pom121l2    | 8.93511832 | -0.0899667 | 0.43151702 | -0.2084893 | 0.83484693 | 0.93631091 |
| Rd3         | 2.26650221 | -0.090009  | 0.31847934 | -0.282621  | 0.77746737 | NA         |
| Med31       | 1169.11332 | -0.0900834 | 0.22222099 | -0.4053774 | 0.68520011 | 0.86969857 |
| Cdc42bpa    | 2389.44725 | -0.0901305 | 0.18953889 | -0.4755253 | 0.63441262 | 0.83928202 |
| Nrm         | 2149.34029 | -0.0902473 | 0.18694715 | -0.4827425 | 0.62927857 | 0.83633117 |
| Exoc2       | 2726.87739 | -0.09025   | 0.19119822 | -0.4720235 | 0.63691005 | 0.84086834 |
| Lrcol1      | 93.5099709 | -0.0902507 | 0.39979091 | -0.2257448 | 0.82139988 | 0.93076517 |
| Cldn25      | 2671.47224 | -0.0902559 | 0.18342914 | -0.4920478 | 0.62268555 | 0.83247791 |
| Prr12       | 4105.3899  | -0.0903232 | 0.25725874 | -0.3510986 | 0.72551436 | 0.88922398 |
| R3hdm1      | 6356.00025 | -0.0905144 | 0.1553446  | -0.5826688 | 0.5601163  | 0.79814554 |
| Lamb2       | 4606.7741  | -0.0905168 | 0.1939113  | -0.466795  | 0.64064657 | 0.84308156 |
| Tmem55a     | 4100.42862 | -0.0905421 | 0.151097   | -0.5992316 | 0.54901848 | 0.78951233 |
| Zwint       | 7517.6074  | -0.0906178 | 0.15477663 | -0.5854749 | 0.55822844 | 0.79658335 |
| Dhx40       | 5677.7815  | -0.0906537 | 0.1665324  | -0.5443607 | 0.58619327 | 0.8126129  |
| Abca17      | 18.0179607 | -0.0907164 | 0.40956981 | -0.221492  | 0.8247094  | 0.93107393 |
| Large       | 1392.93474 | -0.0907182 | 0.18953597 | -0.4786332 | 0.6321996  | 0.83806461 |
| Cyp2c69     | 7.09616061 | -0.0908535 | 0.4226215  | -0.214976  | 0.82978603 | 0.93342798 |
| Calhm1      | 2.03011139 | -0.0908725 | 0.27643108 | -0.3287347 | 0.74235624 | NA         |
| Tmem108     | 311.400751 | -0.091014  | 0.38280236 | -0.2377572 | 0.81206943 | 0.92863385 |
| Zfp444      | 1713.22113 | -0.091035  | 0.22429314 | -0.4058749 | 0.68483453 | 0.86944308 |
| Foxp1       | 435.827404 | -0.0910855 | 0.31031192 | -0.2935289 | 0.7691179  | 0.90747742 |
| Ado         | 3321.91903 | -0.0910966 | 0.21003616 | -0.4337188 | 0.66449263 | 0.85719825 |
| Plekhh1     | 7882.8177  | -0.0911022 | 0.21125805 | -0.4312365 | 0.66629638 | 0.8585804  |
| Polr3k      | 3090.92013 | -0.0911113 | 0.2271137  | -0.4011704 | 0.6882947  | 0.8714925  |
| C1ra        | 5.7941977  | -0.0911257 | 0.38397288 | -0.2373231 | 0.81240611 | NA         |
| Eno3        | 837.626637 | -0.0911493 | 0.26103028 | -0.3491904 | 0.72694634 | 0.88950684 |
| Col18a1     | 7699.21762 | -0.091226  | 0.32383738 | -0.2817032 | 0.77817108 | 0.91216552 |
| Ctps        | 13501.1163 | -0.091282  | 0.14412689 | -0.6333447 | 0.52650859 | 0.77418069 |
| 4930504O13l | 2.58319548 | -0.091293  | 0.32898826 | -0.2774963 | 0.78139902 | NA         |
| Pld2        | 423.03467  | -0.0913739 | 0.30948343 | -0.2952466 | 0.76780552 | 0.90649963 |
| Il17re      | 30.2985644 | -0.0913857 | 0.38790672 | -0.2355868 | 0.8137533  | 0.92878688 |
| Bag5        | 1549.34115 | -0.0914625 | 0.19264225 | -0.4747788 | 0.63494464 | 0.83934241 |
| Tmem259     | 4791.88909 | -0.0915493 | 0.18891705 | -0.4846003 | 0.62795992 | 0.83543543 |

|             |            |            |            |            |            |            |
|-------------|------------|------------|------------|------------|------------|------------|
| Anp32b      | 22942.9188 | -0.0915555 | 0.18073781 | -0.5065651 | 0.61245997 | 0.82770184 |
| Bcl10       | 2779.70906 | -0.0916587 | 0.14845193 | -0.61743   | 0.53695114 | 0.78108804 |
| Slc16a11    | 20.7085967 | -0.0916853 | 0.43162039 | -0.2124212 | 0.83177842 | 0.93433879 |
| Dhx38       | 5466.36991 | -0.0917481 | 0.292668   | -0.3134888 | 0.75390937 | 0.90191816 |
| Myl3        | 1.28041959 | -0.0917674 | 0.27383478 | -0.3351195 | 0.73753496 | NA         |
| Pgd         | 18437.081  | -0.0918206 | 0.22072597 | -0.4159938 | 0.67741457 | 0.8654678  |
| Snrk        | 536.232496 | -0.0918447 | 0.22376339 | -0.4104546 | 0.68147249 | 0.86734737 |
| Nup62-il4i1 | 20.5325301 | -0.0918794 | 0.41811615 | -0.2197462 | 0.8260688  | 0.93162637 |
| Mrps22      | 2861.61373 | -0.0918821 | 0.15084162 | -0.6091299 | 0.54243835 | 0.78520513 |
| Slain1      | 1034.89348 | -0.0919239 | 0.26588023 | -0.3457343 | 0.72954243 | 0.89040454 |
| Snapc5      | 1733.27824 | -0.0919267 | 0.18621857 | -0.4936493 | 0.62155391 | 0.83196874 |
| Gm15612     | 1.6488085  | -0.0920691 | 0.2956636  | -0.3113982 | 0.75549795 | NA         |
| Gm15413     | 1.6488085  | -0.0920691 | 0.2956636  | -0.3113982 | 0.75549795 | NA         |
| Cd320       | 2327.02787 | -0.0921081 | 0.1984626  | -0.4641079 | 0.64257046 | 0.84425594 |
| Epgn        | 1.31165489 | -0.0921184 | 0.25288278 | -0.3642729 | 0.71565421 | NA         |
| Tex36       | 1.70728249 | -0.0921744 | 0.29162965 | -0.3160667 | 0.75195186 | NA         |
| Spag1       | 515.768209 | -0.0922881 | 0.1971134  | -0.4681979 | 0.63964305 | 0.84238903 |
| Cdca8       | 8423.43252 | -0.0922966 | 0.17667772 | -0.5224009 | 0.60139119 | 0.82154763 |
| Ppap2a      | 2395.51628 | -0.0923337 | 0.2204485  | -0.4188446 | 0.67532969 | 0.86422417 |
| Zcchc2      | 2807.25782 | -0.0924868 | 0.20422796 | -0.4528606 | 0.65064914 | 0.84904399 |
| Vps72       | 3705.33863 | -0.0924928 | 0.17512051 | -0.5281667 | 0.59738365 | 0.81957769 |
| Rabep1      | 6118.7928  | -0.092521  | 0.17873193 | -0.5176526 | 0.6047007  | 0.82336928 |
| Snx8        | 2096.70641 | -0.0928409 | 0.16674586 | -0.5567806 | 0.57767734 | 0.80754389 |
| Fanca       | 5654.25087 | -0.0929655 | 0.22711642 | -0.4093295 | 0.68229787 | 0.86782626 |
| 4933422H20I | 6.04204388 | -0.092975  | 0.41448955 | -0.2243121 | 0.82251446 | 0.93107393 |
| Mxi1        | 3247.99743 | -0.0930051 | 0.18758009 | -0.4958156 | 0.62002455 | 0.83138912 |
| Trim38      | 8.33099387 | -0.0931158 | 0.42041851 | -0.2214836 | 0.82471587 | 0.93107393 |
| Mir182      | 1.06411173 | -0.0931203 | 0.23557397 | -0.395291  | 0.69262812 | NA         |
| Mkks        | 2681.52455 | -0.0931477 | 0.16149731 | -0.5767756 | 0.56409107 | 0.80062448 |
| Ndufs4      | 7753.82822 | -0.0931601 | 0.21830613 | -0.4267407 | 0.66956819 | 0.86052797 |
| Snora2b     | 27.4278401 | -0.0931868 | 0.41150455 | -0.2264539 | 0.82084841 | 0.93066591 |
| Ggt7        | 352.623372 | -0.0932809 | 0.35524588 | -0.2625813 | 0.79287329 | 0.91924101 |
| Snx4        | 7584.93119 | -0.0933118 | 0.15227324 | -0.6127916 | 0.54001418 | 0.78381188 |
| Gm11944     | 83.2647557 | -0.0933239 | 0.30554039 | -0.305439  | 0.76003183 | 0.90409661 |
| Ttc9c       | 7035.76471 | -0.0933933 | 0.17120423 | -0.5455083 | 0.58540395 | 0.81209791 |
| Rbp2        | 9.12711115 | -0.0935469 | 0.41154179 | -0.2273084 | 0.82018398 | 0.930536   |
| Tmem30a     | 5063.91856 | -0.0936187 | 0.20639445 | -0.4535911 | 0.65012315 | 0.84900546 |
| Add2        | 6.35420989 | -0.0936478 | 0.42244048 | -0.2216827 | 0.82456088 | 0.93107393 |
| Endov       | 575.077953 | -0.0937348 | 0.23264955 | -0.4029014 | 0.68702079 | 0.87068415 |
| Fkbp2       | 1117.57331 | -0.093741  | 0.24085314 | -0.3892038 | 0.69712541 | 0.87645821 |
| Ankmy2      | 3590.37353 | -0.0937958 | 0.16902081 | -0.5549364 | 0.57893814 | 0.80810223 |

|             |            |            |            |            |            |            |
|-------------|------------|------------|------------|------------|------------|------------|
| Rnf126      | 3126.77906 | -0.0938162 | 0.20144147 | -0.4657244 | 0.64141278 | 0.84346082 |
| Slc39a3     | 411.073068 | -0.0938475 | 0.222333   | -0.4221033 | 0.67294959 | 0.86279388 |
| Irf4        | 0.91787583 | -0.0939334 | 0.1816851  | -0.5170122 | 0.60514766 | NA         |
| Actr3       | 10619.6603 | -0.0939655 | 0.1599538  | -0.587454  | 0.55689882 | 0.7957956  |
| Tsr1        | 16018.0482 | -0.0940546 | 0.19042004 | -0.4939323 | 0.621354   | 0.83196874 |
| Dlat        | 7138.65965 | -0.0940895 | 0.20595891 | -0.4568362 | 0.64778878 | 0.84806214 |
| Shank1      | 67.4154303 | -0.0941835 | 0.40071009 | -0.2350415 | 0.81417649 | 0.92878688 |
| 5-Sep       | 94.9637407 | -0.0942527 | 0.35902971 | -0.2625207 | 0.79292    | 0.91924101 |
| Abca5       | 311.076941 | -0.0942727 | 0.29364149 | -0.3210469 | 0.74817484 | 0.90057336 |
| Mrps14      | 4366.18955 | -0.0943593 | 0.16418251 | -0.574722  | 0.56547934 | 0.80155685 |
| Cmtr1       | 5937.23191 | -0.0943831 | 0.1557482  | -0.6059979 | 0.54451612 | 0.78623679 |
| Arl1        | 3638.19958 | -0.0943884 | 0.14677489 | -0.6430825 | 0.52017058 | 0.76986886 |
| Ly6f        | 6.418692   | -0.0944516 | 0.41532784 | -0.2274146 | 0.82010135 | 0.930536   |
| Gm3258      | 6.59602891 | -0.09446   | 0.41397694 | -0.2281769 | 0.81950873 | 0.93046822 |
| Pctp        | 422.123769 | -0.0944667 | 0.32724364 | -0.2886739 | 0.77283096 | 0.90962818 |
| 2310007L24F | 1.55135828 | -0.0945096 | 0.1953049  | -0.4839081 | 0.6284511  | NA         |
| Haus1       | 4811.58027 | -0.0945466 | 0.24590547 | -0.3844834 | 0.70062017 | 0.87785127 |
| Hnrnpul2    | 22136.7292 | -0.0948174 | 0.20963862 | -0.4522897 | 0.65106032 | 0.84938247 |
| 3010026O09I | 1152.73666 | -0.0948536 | 0.24898963 | -0.3809539 | 0.70323744 | 0.87926282 |
| Apold1      | 113.261221 | -0.0949279 | 0.4201936  | -0.2259146 | 0.82126785 | 0.93076517 |
| Pan2        | 6073.67622 | -0.0949942 | 0.17438018 | -0.5447537 | 0.58592296 | 0.8125279  |
| Zswim1      | 3501.17328 | -0.0950251 | 0.17966239 | -0.5289092 | 0.59686844 | 0.81955304 |
| Ppp1r32     | 15.1885168 | -0.0950573 | 0.42647169 | -0.2228923 | 0.82361933 | 0.93107393 |
| Kctd13      | 597.430719 | -0.0950743 | 0.2409759  | -0.3945386 | 0.69318341 | 0.8746203  |
| Kdm3a       | 21919.0452 | -0.0951005 | 0.18916559 | -0.5027369 | 0.61514924 | 0.82953469 |
| Mink1       | 3246.53335 | -0.0951083 | 0.21396913 | -0.4444955 | 0.65668437 | 0.85275541 |
| Sdhaf1      | 894.293773 | -0.0952182 | 0.20097685 | -0.473777  | 0.63565892 | 0.83971559 |
| Api5        | 15210.0834 | -0.0953299 | 0.17517396 | -0.544201  | 0.58630313 | 0.81262032 |
| Mir27a      | 0.79781964 | -0.0953381 | 0.19363936 | -0.492349  | 0.62247264 | NA         |
| Gpr142      | 0.79781964 | -0.0953381 | 0.19363936 | -0.492349  | 0.62247264 | NA         |
| Klf2        | 13662.1195 | -0.0953677 | 0.18625318 | -0.5120328 | 0.60862808 | 0.82562526 |
| Agbl5       | 1031.49293 | -0.095382  | 0.19638779 | -0.485682  | 0.62719268 | 0.83498616 |
| Plekha1     | 5032.01948 | -0.0953891 | 0.14647094 | -0.6512496 | 0.51488541 | 0.76651865 |
| Pars2       | 1222.91454 | -0.0953905 | 0.19343395 | -0.4931424 | 0.62191197 | 0.83196874 |
| E130215H24I | 1.69297101 | -0.0954588 | 0.29150668 | -0.327467  | 0.74331468 | NA         |
| Pmm1        | 11807.062  | -0.0954607 | 0.18488637 | -0.5163211 | 0.60563013 | 0.82418428 |
| Taco1       | 1096.13127 | -0.0954802 | 0.19557802 | -0.4881952 | 0.6254116  | 0.83404303 |
| Cenph       | 5023.39755 | -0.0955492 | 0.19830535 | -0.4818287 | 0.62992763 | 0.83655035 |
| Rprm        | 54.9495662 | -0.0956145 | 0.38314806 | -0.2495497 | 0.80293558 | 0.92352256 |
| Speer4b     | 3.45962959 | -0.0956374 | 0.22875712 | -0.418074  | 0.675893   | NA         |
| Mcur1       | 990.764499 | -0.0957055 | 0.18433317 | -0.5191985 | 0.60362231 | 0.82288924 |

|             |            |            |            |            |            |            |
|-------------|------------|------------|------------|------------|------------|------------|
| Rpl22l1     | 13045.5655 | -0.0958956 | 0.23706685 | -0.4045087 | 0.68583871 | 0.87014375 |
| Wbp4        | 3690.76771 | -0.0958958 | 0.1449431  | -0.6616102 | 0.50822105 | 0.76323954 |
| Fbxo18      | 5254.12597 | -0.0959097 | 0.17411632 | -0.5508368 | 0.58174554 | 0.80984021 |
| 4930430A15f | 0.15468727 | -0.0959636 | 0.15181388 | -0.6321134 | 0.5273128  | NA         |
| Gm5127      | 0.15468727 | -0.0959636 | 0.15181388 | -0.6321134 | 0.5273128  | NA         |
| 4930593C16f | 0.15468727 | -0.0959636 | 0.15181388 | -0.6321134 | 0.5273128  | NA         |
| Dnah9       | 0.15468727 | -0.0959636 | 0.15181388 | -0.6321134 | 0.5273128  | NA         |
| Gm16617     | 0.15468727 | -0.0959636 | 0.15181388 | -0.6321134 | 0.5273128  | NA         |
| Gm12718     | 0.15468727 | -0.0959636 | 0.15181388 | -0.6321134 | 0.5273128  | NA         |
| Musk        | 0.15468727 | -0.0959636 | 0.15181388 | -0.6321134 | 0.5273128  | NA         |
| 4930414N06l | 0.15468727 | -0.0959636 | 0.15181388 | -0.6321134 | 0.5273128  | NA         |
| G630071F17f | 0.15468727 | -0.0959636 | 0.15181388 | -0.6321134 | 0.5273128  | NA         |
| Neurod2     | 0.15468727 | -0.0959636 | 0.15181388 | -0.6321134 | 0.5273128  | NA         |
| Klk1b27     | 0.15468727 | -0.0959636 | 0.15181388 | -0.6321134 | 0.5273128  | NA         |
| Pabpc5      | 0.15468727 | -0.0959636 | 0.15181388 | -0.6321134 | 0.5273128  | NA         |
| Pcdhb2      | 0.15468727 | -0.0959636 | 0.15181388 | -0.6321134 | 0.5273128  | NA         |
| Il27        | 0.15468727 | -0.0959636 | 0.15181388 | -0.6321134 | 0.5273128  | NA         |
| Tectb       | 0.15468727 | -0.0959636 | 0.15181388 | -0.6321134 | 0.5273128  | NA         |
| Lilrb4      | 0.15468727 | -0.0959636 | 0.15181388 | -0.6321134 | 0.5273128  | NA         |
| Gm2837      | 0.15468727 | -0.0959636 | 0.15181388 | -0.6321134 | 0.5273128  | NA         |
| 4921508D12l | 0.15468727 | -0.0959636 | 0.15181388 | -0.6321134 | 0.5273128  | NA         |
| Zdhhc11     | 0.15468727 | -0.0959636 | 0.15181388 | -0.6321134 | 0.5273128  | NA         |
| Glyat       | 0.15468727 | -0.0959636 | 0.15181388 | -0.6321134 | 0.5273128  | NA         |
| Taar1       | 0.15468727 | -0.0959636 | 0.15181388 | -0.6321134 | 0.5273128  | NA         |
| 1700121N20l | 0.15468727 | -0.0959636 | 0.15181388 | -0.6321134 | 0.5273128  | NA         |
| Mir1195     | 0.15468727 | -0.0959636 | 0.15181388 | -0.6321134 | 0.5273128  | NA         |
| Klre1       | 0.15468727 | -0.0959636 | 0.15181388 | -0.6321134 | 0.5273128  | NA         |
| Gm17746     | 0.15468727 | -0.0959636 | 0.15181388 | -0.6321134 | 0.5273128  | NA         |
| Gm20187     | 0.15468727 | -0.0959636 | 0.15181388 | -0.6321134 | 0.5273128  | NA         |
| Gucy2d      | 0.15468727 | -0.0959636 | 0.15181388 | -0.6321134 | 0.5273128  | NA         |
| 4933415F23F | 0.15468727 | -0.0959636 | 0.15181388 | -0.6321134 | 0.5273128  | NA         |
| Stap1       | 0.15468727 | -0.0959636 | 0.15181388 | -0.6321134 | 0.5273128  | NA         |
| Scnn1g      | 0.15468727 | -0.0959636 | 0.15181388 | -0.6321134 | 0.5273128  | NA         |
| Cml5        | 0.15468727 | -0.0959636 | 0.15181388 | -0.6321134 | 0.5273128  | NA         |
| Gdf6        | 0.15468727 | -0.0959636 | 0.15181388 | -0.6321134 | 0.5273128  | NA         |
| Olf1107     | 0.15468727 | -0.0959636 | 0.15181388 | -0.6321134 | 0.5273128  | NA         |
| Lgi4        | 0.15468727 | -0.0959636 | 0.15181388 | -0.6321134 | 0.5273128  | NA         |
| H2-L        | 0.15468727 | -0.0959636 | 0.15181388 | -0.6321134 | 0.5273128  | NA         |
| Mir7021     | 0.15468727 | -0.0959636 | 0.15181388 | -0.6321134 | 0.5273128  | NA         |
| Pcp4        | 0.15468727 | -0.0959636 | 0.15181388 | -0.6321134 | 0.5273128  | NA         |
| Hottip      | 0.15468727 | -0.0959636 | 0.15181388 | -0.6321134 | 0.5273128  | NA         |

|             |            |            |            |            |           |    |
|-------------|------------|------------|------------|------------|-----------|----|
| Ambn        | 0.15468727 | -0.0959636 | 0.15181388 | -0.6321134 | 0.5273128 | NA |
| Tmbim7      | 0.15468727 | -0.0959636 | 0.15181388 | -0.6321134 | 0.5273128 | NA |
| Neto1       | 0.15468727 | -0.0959636 | 0.15181388 | -0.6321134 | 0.5273128 | NA |
| D530049I02R | 0.15468727 | -0.0959636 | 0.15181388 | -0.6321134 | 0.5273128 | NA |
| 4833411C07F | 0.15468727 | -0.0959636 | 0.15181388 | -0.6321134 | 0.5273128 | NA |
| Olfm3       | 0.15468727 | -0.0959636 | 0.15181388 | -0.6321134 | 0.5273128 | NA |
| D730048I06R | 0.15468727 | -0.0959636 | 0.15181388 | -0.6321134 | 0.5273128 | NA |
| Gm10445     | 0.15468727 | -0.0959636 | 0.15181388 | -0.6321134 | 0.5273128 | NA |
| Rxfp1       | 0.15468727 | -0.0959636 | 0.15181388 | -0.6321134 | 0.5273128 | NA |
| BC049352    | 0.15468727 | -0.0959636 | 0.15181388 | -0.6321134 | 0.5273128 | NA |
| 4931440J10R | 0.15468727 | -0.0959636 | 0.15181388 | -0.6321134 | 0.5273128 | NA |
| Kcnj5       | 0.15468727 | -0.0959636 | 0.15181388 | -0.6321134 | 0.5273128 | NA |
| 4930556N09I | 0.15468727 | -0.0959636 | 0.15181388 | -0.6321134 | 0.5273128 | NA |
| Glp2r       | 0.15468727 | -0.0959636 | 0.15181388 | -0.6321134 | 0.5273128 | NA |
| 4930520P13F | 0.15468727 | -0.0959636 | 0.15181388 | -0.6321134 | 0.5273128 | NA |
| F13a1       | 0.15468727 | -0.0959636 | 0.15181388 | -0.6321134 | 0.5273128 | NA |
| ERCC-00004  | 0.15468727 | -0.0959636 | 0.15181388 | -0.6321134 | 0.5273128 | NA |
| Slc17a1     | 0.15468727 | -0.0959636 | 0.15181388 | -0.6321134 | 0.5273128 | NA |
| H2-M1       | 0.15468727 | -0.0959636 | 0.15181388 | -0.6321134 | 0.5273128 | NA |
| 1700018G05I | 0.15468727 | -0.0959636 | 0.15181388 | -0.6321134 | 0.5273128 | NA |
| 1700027A15f | 0.15468727 | -0.0959636 | 0.15181388 | -0.6321134 | 0.5273128 | NA |
| Gzmn        | 0.15468727 | -0.0959636 | 0.15181388 | -0.6321134 | 0.5273128 | NA |
| Slc17a2     | 0.15468727 | -0.0959636 | 0.15181388 | -0.6321134 | 0.5273128 | NA |
| Mir3473g    | 0.15468727 | -0.0959636 | 0.15181388 | -0.6321134 | 0.5273128 | NA |
| Mug-ps1     | 0.15468727 | -0.0959636 | 0.15181388 | -0.6321134 | 0.5273128 | NA |
| Scgb1b27    | 0.15468727 | -0.0959636 | 0.15181388 | -0.6321134 | 0.5273128 | NA |
| Mir1947     | 0.15468727 | -0.0959636 | 0.15181388 | -0.6321134 | 0.5273128 | NA |
| Ostn        | 0.15468727 | -0.0959636 | 0.15181388 | -0.6321134 | 0.5273128 | NA |
| Hyal4       | 0.15468727 | -0.0959636 | 0.15181388 | -0.6321134 | 0.5273128 | NA |
| Nlrp9a      | 0.15468727 | -0.0959636 | 0.15181388 | -0.6321134 | 0.5273128 | NA |
| Gm14436     | 0.15468727 | -0.0959636 | 0.15181388 | -0.6321134 | 0.5273128 | NA |
| Apoa4       | 0.15468727 | -0.0959636 | 0.15181388 | -0.6321134 | 0.5273128 | NA |
| Gm7616      | 0.15468727 | -0.0959636 | 0.15181388 | -0.6321134 | 0.5273128 | NA |
| Svs5        | 0.15468727 | -0.0959636 | 0.15181388 | -0.6321134 | 0.5273128 | NA |
| Olf1510     | 0.15468727 | -0.0959636 | 0.15181388 | -0.6321134 | 0.5273128 | NA |
| Sstr4       | 0.15468727 | -0.0959636 | 0.15181388 | -0.6321134 | 0.5273128 | NA |
| Mir7069     | 0.15468727 | -0.0959636 | 0.15181388 | -0.6321134 | 0.5273128 | NA |
| Rcvrn       | 0.15468727 | -0.0959636 | 0.15181388 | -0.6321134 | 0.5273128 | NA |
| Mir101b     | 0.15468727 | -0.0959636 | 0.15181388 | -0.6321134 | 0.5273128 | NA |
| Hcar2       | 0.15468727 | -0.0959636 | 0.15181388 | -0.6321134 | 0.5273128 | NA |
| Mrgprx2     | 0.15468727 | -0.0959636 | 0.15181388 | -0.6321134 | 0.5273128 | NA |

|             |            |            |            |            |            |            |
|-------------|------------|------------|------------|------------|------------|------------|
| Ugt2b35     | 0.15468727 | -0.0959636 | 0.15181388 | -0.6321134 | 0.5273128  | NA         |
| Mir6916     | 0.15468727 | -0.0959636 | 0.15181388 | -0.6321134 | 0.5273128  | NA         |
| Ccr2        | 0.15468727 | -0.0959636 | 0.15181388 | -0.6321134 | 0.5273128  | NA         |
| Ldb2        | 0.15468727 | -0.0959636 | 0.15181388 | -0.6321134 | 0.5273128  | NA         |
| Gm4759      | 0.15468727 | -0.0959636 | 0.15181388 | -0.6321134 | 0.5273128  | NA         |
| C230024C17F | 0.15468727 | -0.0959636 | 0.15181388 | -0.6321134 | 0.5273128  | NA         |
| Gm10142     | 0.15468727 | -0.0959636 | 0.15181388 | -0.6321134 | 0.5273128  | NA         |
| Gm4432      | 0.15468727 | -0.0959636 | 0.15181388 | -0.6321134 | 0.5273128  | NA         |
| Slx         | 0.15468727 | -0.0959636 | 0.15181388 | -0.6321134 | 0.5273128  | NA         |
| Zfp957      | 0.15468727 | -0.0959636 | 0.15181388 | -0.6321134 | 0.5273128  | NA         |
| Mir7034     | 0.15468727 | -0.0959636 | 0.15181388 | -0.6321134 | 0.5273128  | NA         |
| Ofcc1       | 0.15468727 | -0.0959636 | 0.15181388 | -0.6321134 | 0.5273128  | NA         |
| 2310020H05I | 0.15468727 | -0.0959636 | 0.15181388 | -0.6321134 | 0.5273128  | NA         |
| Bpifb3      | 0.15468727 | -0.0959636 | 0.15181388 | -0.6321134 | 0.5273128  | NA         |
| 1500017E21F | 0.15468727 | -0.0959636 | 0.15181388 | -0.6321134 | 0.5273128  | NA         |
| Clrn1       | 0.15468727 | -0.0959636 | 0.15181388 | -0.6321134 | 0.5273128  | NA         |
| Mir8093     | 0.15468727 | -0.0959636 | 0.15181388 | -0.6321134 | 0.5273128  | NA         |
| Krt34       | 0.15468727 | -0.0959636 | 0.15181388 | -0.6321134 | 0.5273128  | NA         |
| Cd163       | 0.15468727 | -0.0959636 | 0.15181388 | -0.6321134 | 0.5273128  | NA         |
| Gm4884      | 0.15468727 | -0.0959636 | 0.15181388 | -0.6321134 | 0.5273128  | NA         |
| Lyz1        | 0.15468727 | -0.0959636 | 0.15181388 | -0.6321134 | 0.5273128  | NA         |
| Clec1a      | 0.15468727 | -0.0959636 | 0.15181388 | -0.6321134 | 0.5273128  | NA         |
| 1700006E09F | 0.15468727 | -0.0959636 | 0.15181388 | -0.6321134 | 0.5273128  | NA         |
| Nrl         | 0.15468727 | -0.0959636 | 0.15181388 | -0.6321134 | 0.5273128  | NA         |
| Olfr979     | 0.15468727 | -0.0959636 | 0.15181388 | -0.6321134 | 0.5273128  | NA         |
| Antxrl      | 0.15468727 | -0.0959636 | 0.15181388 | -0.6321134 | 0.5273128  | NA         |
| Cntnap5b    | 0.15468727 | -0.0959636 | 0.15181388 | -0.6321134 | 0.5273128  | NA         |
| Il1rapl2    | 0.15468727 | -0.0959636 | 0.15181388 | -0.6321134 | 0.5273128  | NA         |
| Mir692-1    | 0.15468727 | -0.0959636 | 0.15181388 | -0.6321134 | 0.5273128  | NA         |
| Gm9268      | 0.15468727 | -0.0959636 | 0.15181388 | -0.6321134 | 0.5273128  | NA         |
| 1700027J07R | 0.15468727 | -0.0959636 | 0.15181388 | -0.6321134 | 0.5273128  | NA         |
| Fcnb        | 0.15468727 | -0.0959636 | 0.15181388 | -0.6321134 | 0.5273128  | NA         |
| Dear1       | 0.15468727 | -0.0959636 | 0.15181388 | -0.6321134 | 0.5273128  | NA         |
| Ccdc159     | 74.6177775 | -0.0960181 | 0.31544998 | -0.3043845 | 0.76083499 | 0.90436024 |
| Chrna10     | 9.17614352 | -0.0961631 | 0.40084213 | -0.2399028 | 0.81040563 | 0.9275573  |
| Drd1a       | 1.0515619  | -0.0962429 | 0.23519322 | -0.4092077 | 0.68238721 | NA         |
| Il4ra       | 91.8935853 | -0.0962446 | 0.37747806 | -0.2549674 | 0.79874824 | 0.92171351 |
| Eif2ak3     | 2426.27488 | -0.0962689 | 0.20931317 | -0.4599276 | 0.64556821 | 0.84633547 |
| Erlec1      | 1764.08718 | -0.0962856 | 0.20867268 | -0.4614195 | 0.64449765 | 0.84561062 |
| Snora44     | 90.360956  | -0.0963605 | 0.30804074 | -0.3128173 | 0.75441945 | 0.90191816 |
| Ifitm6      | 33.1722418 | -0.0964311 | 0.43224422 | -0.223094  | 0.82346238 | 0.93107393 |

|         |            |            |            |            |            |            |
|---------|------------|------------|------------|------------|------------|------------|
| Nell1   | 4.15651928 | -0.0964518 | 0.37482007 | -0.2573284 | 0.7969253  | NA         |
| Cldn14  | 8.85729215 | -0.0964619 | 0.37440602 | -0.2576399 | 0.79668483 | 0.92070321 |
| Ndufb3  | 2798.59684 | -0.0964793 | 0.20457471 | -0.4716091 | 0.63720583 | 0.84104463 |
| Trmt10a | 2539.45015 | -0.0964917 | 0.17264655 | -0.5588975 | 0.57623168 | 0.80734073 |
| Erap1   | 336.513604 | -0.0965027 | 0.27700886 | -0.348374  | 0.7275593  | 0.88986097 |
| Luc7l2  | 10639.9138 | -0.0965722 | 0.19024274 | -0.5076264 | 0.61171539 | 0.8270499  |
| Inpp5e  | 793.552155 | -0.0965996 | 0.2160595  | -0.4470973 | 0.65480484 | 0.85212302 |
| Mettl14 | 3211.56567 | -0.0966024 | 0.14620864 | -0.6607159 | 0.50879454 | 0.76362746 |
| Rnase6  | 7.9929247  | -0.0966184 | 0.36885278 | -0.2619429 | 0.79336544 | 0.91954293 |
| Ing3    | 2348.88776 | -0.0966382 | 0.17977259 | -0.5375579 | 0.59088227 | 0.8159154  |
| Lipe    | 810.101858 | -0.0966799 | 0.21461456 | -0.4504814 | 0.65236333 | 0.85029773 |
| Ogt     | 17680.8701 | -0.0967291 | 0.16659221 | -0.5806342 | 0.56148699 | 0.79905798 |
| Kcns2   | 23.9312575 | -0.096905  | 0.42504745 | -0.2279863 | 0.81965688 | 0.93046822 |
| Aggf1   | 5046.20516 | -0.0969264 | 0.19655384 | -0.4931288 | 0.62192159 | 0.83196874 |
| Dpy19l1 | 6659.91949 | -0.0969747 | 0.16841448 | -0.57581   | 0.56474365 | 0.8012435  |
| Cog3    | 3734.2609  | -0.0969829 | 0.15268632 | -0.6351774 | 0.5253127  | 0.77308014 |
| Sipa1   | 762.279602 | -0.0970113 | 0.21756135 | -0.4459034 | 0.65566702 | 0.8525124  |
| Tmem60  | 1433.14153 | -0.0970296 | 0.2384371  | -0.4069399 | 0.6840521  | 0.86895068 |
| Cntnap1 | 26.0212584 | -0.0972034 | 0.43079943 | -0.2256349 | 0.82148541 | 0.93076517 |
| Rfesd   | 541.387121 | -0.0972049 | 0.22637271 | -0.4294021 | 0.66763064 | 0.85924293 |
| Clic5   | 1.30965659 | -0.0974951 | 0.27909481 | -0.3493262 | 0.72684442 | NA         |
| Coq5    | 2643.24347 | -0.0975426 | 0.17322204 | -0.5631076 | 0.57336162 | 0.80635813 |
| Hcn2    | 625.199873 | -0.0976079 | 0.18576785 | -0.5254294 | 0.59928473 | 0.8201599  |
| Gm13752 | 12.2758468 | -0.0977002 | 0.39228974 | -0.249051  | 0.80332132 | 0.92355442 |
| Eya3    | 5769.02786 | -0.0978085 | 0.188003   | -0.5202497 | 0.60288956 | 0.82248755 |
| Tmem44  | 519.762385 | -0.0978392 | 0.26571612 | -0.3682095 | 0.71271706 | 0.88384872 |
| Cldn20  | 10.1670362 | -0.0978491 | 0.43153253 | -0.2267479 | 0.8206198  | 0.930536   |
| Flrt3   | 239.449861 | -0.0978602 | 0.35228516 | -0.2777869 | 0.78117595 | 0.91331984 |
| Tmprss3 | 1.96149194 | -0.0979201 | 0.30601766 | -0.3199818 | 0.74898211 | NA         |
| Cdh19   | 2.90680784 | -0.0979299 | 0.36599517 | -0.2675716 | 0.78902907 | NA         |
| Sgip1   | 1.04440616 | -0.0979953 | 0.23496517 | -0.4170631 | 0.67663224 | NA         |
| Gm14085 | 0.81714782 | -0.0980597 | 0.19498834 | -0.5029001 | 0.61503452 | NA         |
| Ndufs7  | 3252.34673 | -0.0980768 | 0.21529889 | -0.455538  | 0.64872224 | 0.84862854 |
| Ndufa11 | 4909.91089 | -0.0981717 | 0.22603167 | -0.4343274 | 0.66405071 | 0.85698362 |
| Atp7a   | 3230.23568 | -0.0981734 | 0.23129986 | -0.424442  | 0.67124346 | 0.86169074 |
| Ppif    | 3235.33659 | -0.0982572 | 0.1681954  | -0.5841846 | 0.55909614 | 0.79722208 |
| Rab3c   | 0.78526981 | -0.0983601 | 0.19307549 | -0.5094384 | 0.61044499 | NA         |
| Slc3a2  | 16813.7921 | -0.0983783 | 0.15337961 | -0.6414038 | 0.5212604  | 0.77003139 |
| Rnmtl1  | 785.739416 | -0.0983878 | 0.19916208 | -0.4940088 | 0.62129997 | 0.83196874 |
| Dpy30   | 13633.7298 | -0.0983927 | 0.21288676 | -0.4621832 | 0.64394997 | 0.84524411 |
| Anapc4  | 6182.58005 | -0.098427  | 0.16389278 | -0.6005572 | 0.54813493 | 0.78882531 |

|             |            |            |            |            |            |            |
|-------------|------------|------------|------------|------------|------------|------------|
| Kansl3      | 4574.97184 | -0.0985237 | 0.16278164 | -0.6052509 | 0.54501231 | 0.78651585 |
| Camsap1     | 3729.88237 | -0.0985967 | 0.20929919 | -0.4710802 | 0.63758344 | 0.84125743 |
| Tmem41a     | 772.39237  | -0.0986477 | 0.20054248 | -0.4919042 | 0.62278707 | 0.83253766 |
| Tox4        | 7575.05585 | -0.0986791 | 0.15443357 | -0.6389742 | 0.52283972 | 0.77126546 |
| Entpd1      | 1.19204975 | -0.0987012 | 0.21421635 | -0.4607547 | 0.64497462 | NA         |
| Snapc2      | 1405.15594 | -0.0987737 | 0.18425035 | -0.5360841 | 0.59190046 | 0.81637641 |
| Syap1       | 2554.89515 | -0.0988598 | 0.16453692 | -0.6008366 | 0.54794884 | 0.78881129 |
| Kdm3b       | 14852.4035 | -0.0988982 | 0.22182053 | -0.445848  | 0.65570708 | 0.8525124  |
| Mir423      | 0.17676853 | -0.0989254 | 0.15405265 | -0.642153  | 0.52077382 | NA         |
| Mir7031     | 0.17676853 | -0.0989254 | 0.15405265 | -0.642153  | 0.52077382 | NA         |
| Mir1963     | 0.17676853 | -0.0989254 | 0.15405265 | -0.642153  | 0.52077382 | NA         |
| 4930428O21I | 0.17676853 | -0.0989254 | 0.15405265 | -0.642153  | 0.52077382 | NA         |
| Gm9962      | 0.17676853 | -0.0989254 | 0.15405265 | -0.642153  | 0.52077382 | NA         |
| 4930442L01F | 0.17676853 | -0.0989254 | 0.15405265 | -0.642153  | 0.52077382 | NA         |
| Slc7a13     | 0.17676853 | -0.0989254 | 0.15405265 | -0.642153  | 0.52077382 | NA         |
| Gm7134      | 0.17676853 | -0.0989254 | 0.15405265 | -0.642153  | 0.52077382 | NA         |
| Gm3985      | 0.17676853 | -0.0989254 | 0.15405265 | -0.642153  | 0.52077382 | NA         |
| Aqp12       | 0.17676853 | -0.0989254 | 0.15405265 | -0.642153  | 0.52077382 | NA         |
| Mir874      | 0.17676853 | -0.0989254 | 0.15405265 | -0.642153  | 0.52077382 | NA         |
| Hist1h4n    | 0.17676853 | -0.0989254 | 0.15405265 | -0.642153  | 0.52077382 | NA         |
| Cxcl15      | 0.17676853 | -0.0989254 | 0.15405265 | -0.642153  | 0.52077382 | NA         |
| Cntn4       | 0.17676853 | -0.0989254 | 0.15405265 | -0.642153  | 0.52077382 | NA         |
| Pih1d3      | 0.17676853 | -0.0989254 | 0.15405265 | -0.642153  | 0.52077382 | NA         |
| A430090L17F | 0.17676853 | -0.0989254 | 0.15405265 | -0.642153  | 0.52077382 | NA         |
| Adamdec1    | 0.17676853 | -0.0989254 | 0.15405265 | -0.642153  | 0.52077382 | NA         |
| Cyp2c54     | 0.17676853 | -0.0989254 | 0.15405265 | -0.642153  | 0.52077382 | NA         |
| Olf160      | 0.17676853 | -0.0989254 | 0.15405265 | -0.642153  | 0.52077382 | NA         |
| Cyp4a31     | 0.17676853 | -0.0989254 | 0.15405265 | -0.642153  | 0.52077382 | NA         |
| Actrt2      | 0.17676853 | -0.0989254 | 0.15405265 | -0.642153  | 0.52077382 | NA         |
| Mir7663     | 0.17676853 | -0.0989254 | 0.15405265 | -0.642153  | 0.52077382 | NA         |
| Ppbp        | 0.17676853 | -0.0989254 | 0.15405265 | -0.642153  | 0.52077382 | NA         |
| H2-M10.3    | 0.17676853 | -0.0989254 | 0.15405265 | -0.642153  | 0.52077382 | NA         |
| Grxcr2      | 0.17676853 | -0.0989254 | 0.15405265 | -0.642153  | 0.52077382 | NA         |
| A730046J19R | 0.17676853 | -0.0989254 | 0.15405265 | -0.642153  | 0.52077382 | NA         |
| Olf131      | 0.17676853 | -0.0989254 | 0.15405265 | -0.642153  | 0.52077382 | NA         |
| Mir297b     | 0.17676853 | -0.0989254 | 0.15405265 | -0.642153  | 0.52077382 | NA         |
| Il1bos      | 0.17676853 | -0.0989254 | 0.15405265 | -0.642153  | 0.52077382 | NA         |
| 1810065E05F | 0.17676853 | -0.0989254 | 0.15405265 | -0.642153  | 0.52077382 | NA         |
| 1700031M16  | 0.17676853 | -0.0989254 | 0.15405265 | -0.642153  | 0.52077382 | NA         |
| Naip7       | 0.17676853 | -0.0989254 | 0.15405265 | -0.642153  | 0.52077382 | NA         |
| LOC1010562  | 0.17676853 | -0.0989254 | 0.15405265 | -0.642153  | 0.52077382 | NA         |



|             |            |            |            |           |            |    |
|-------------|------------|------------|------------|-----------|------------|----|
| Taar3       | 0.17676853 | -0.0989254 | 0.15405265 | -0.642153 | 0.52077382 | NA |
| Pcdhb8      | 0.17676853 | -0.0989254 | 0.15405265 | -0.642153 | 0.52077382 | NA |
| Olf857      | 0.17676853 | -0.0989254 | 0.15405265 | -0.642153 | 0.52077382 | NA |
| Gm9866      | 0.17676853 | -0.0989254 | 0.15405265 | -0.642153 | 0.52077382 | NA |
| Scgb2b27    | 0.17676853 | -0.0989254 | 0.15405265 | -0.642153 | 0.52077382 | NA |
| Tbc1d22bos  | 0.17676853 | -0.0989254 | 0.15405265 | -0.642153 | 0.52077382 | NA |
| 1700018A04f | 0.17676853 | -0.0989254 | 0.15405265 | -0.642153 | 0.52077382 | NA |
| Myoz2       | 0.17676853 | -0.0989254 | 0.15405265 | -0.642153 | 0.52077382 | NA |
| Mir6934     | 0.17676853 | -0.0989254 | 0.15405265 | -0.642153 | 0.52077382 | NA |
| Adam28      | 0.17676853 | -0.0989254 | 0.15405265 | -0.642153 | 0.52077382 | NA |
| Vmn1r224    | 0.17676853 | -0.0989254 | 0.15405265 | -0.642153 | 0.52077382 | NA |
| 1700025B11f | 0.17676853 | -0.0989254 | 0.15405265 | -0.642153 | 0.52077382 | NA |
| 2810404M03  | 0.17676853 | -0.0989254 | 0.15405265 | -0.642153 | 0.52077382 | NA |
| St6galnac1  | 0.17676853 | -0.0989254 | 0.15405265 | -0.642153 | 0.52077382 | NA |
| 9230009I02R | 0.17676853 | -0.0989254 | 0.15405265 | -0.642153 | 0.52077382 | NA |
| Otol1       | 0.17676853 | -0.0989254 | 0.15405265 | -0.642153 | 0.52077382 | NA |
| Dsg4        | 0.17676853 | -0.0989254 | 0.15405265 | -0.642153 | 0.52077382 | NA |
| Sst         | 0.17676853 | -0.0989254 | 0.15405265 | -0.642153 | 0.52077382 | NA |
| Mir1938     | 0.17676853 | -0.0989254 | 0.15405265 | -0.642153 | 0.52077382 | NA |
| Prl4a1      | 0.17676853 | -0.0989254 | 0.15405265 | -0.642153 | 0.52077382 | NA |
| Mir6968     | 0.17676853 | -0.0989254 | 0.15405265 | -0.642153 | 0.52077382 | NA |
| Mir7020     | 0.17676853 | -0.0989254 | 0.15405265 | -0.642153 | 0.52077382 | NA |
| Itk         | 0.17676853 | -0.0989254 | 0.15405265 | -0.642153 | 0.52077382 | NA |
| Has2os      | 0.17676853 | -0.0989254 | 0.15405265 | -0.642153 | 0.52077382 | NA |
| Kcnk18      | 0.17676853 | -0.0989254 | 0.15405265 | -0.642153 | 0.52077382 | NA |
| Mir1191b    | 0.17676853 | -0.0989254 | 0.15405265 | -0.642153 | 0.52077382 | NA |
| E330012B07f | 0.17676853 | -0.0989254 | 0.15405265 | -0.642153 | 0.52077382 | NA |
| C5ar1       | 0.17676853 | -0.0989254 | 0.15405265 | -0.642153 | 0.52077382 | NA |
| Pcdha3      | 0.17676853 | -0.0989254 | 0.15405265 | -0.642153 | 0.52077382 | NA |
| E030025P04f | 0.17676853 | -0.0989254 | 0.15405265 | -0.642153 | 0.52077382 | NA |
| Rpe65       | 0.17676853 | -0.0989254 | 0.15405265 | -0.642153 | 0.52077382 | NA |
| St6galnac5  | 0.17676853 | -0.0989254 | 0.15405265 | -0.642153 | 0.52077382 | NA |
| Speer4f     | 0.17676853 | -0.0989254 | 0.15405265 | -0.642153 | 0.52077382 | NA |
| 1700011L22f | 0.17676853 | -0.0989254 | 0.15405265 | -0.642153 | 0.52077382 | NA |
| A530046M15  | 0.17676853 | -0.0989254 | 0.15405265 | -0.642153 | 0.52077382 | NA |
| Tsga13      | 0.17676853 | -0.0989254 | 0.15405265 | -0.642153 | 0.52077382 | NA |
| Mir6931     | 0.17676853 | -0.0989254 | 0.15405265 | -0.642153 | 0.52077382 | NA |
| Vmn2r23     | 0.17676853 | -0.0989254 | 0.15405265 | -0.642153 | 0.52077382 | NA |
| 9530052E02f | 0.17676853 | -0.0989254 | 0.15405265 | -0.642153 | 0.52077382 | NA |
| Serpnb6d    | 0.17676853 | -0.0989254 | 0.15405265 | -0.642153 | 0.52077382 | NA |
| Olf984      | 0.17676853 | -0.0989254 | 0.15405265 | -0.642153 | 0.52077382 | NA |

|             |            |            |            |            |            |            |
|-------------|------------|------------|------------|------------|------------|------------|
| Olfr1444    | 0.17676853 | -0.0989254 | 0.15405265 | -0.642153  | 0.52077382 | NA         |
| 4833423E24F | 0.17676853 | -0.0989254 | 0.15405265 | -0.642153  | 0.52077382 | NA         |
| Gm5071      | 0.17676853 | -0.0989254 | 0.15405265 | -0.642153  | 0.52077382 | NA         |
| Gm9994      | 0.17676853 | -0.0989254 | 0.15405265 | -0.642153  | 0.52077382 | NA         |
| Gsdma2      | 0.17676853 | -0.0989254 | 0.15405265 | -0.642153  | 0.52077382 | NA         |
| Adam7       | 0.17676853 | -0.0989254 | 0.15405265 | -0.642153  | 0.52077382 | NA         |
| 4930417O22I | 0.17676853 | -0.0989254 | 0.15405265 | -0.642153  | 0.52077382 | NA         |
| 9430019J16R | 0.17676853 | -0.0989254 | 0.15405265 | -0.642153  | 0.52077382 | NA         |
| Myf6        | 0.17676853 | -0.0989254 | 0.15405265 | -0.642153  | 0.52077382 | NA         |
| 2010002M12  | 0.17676853 | -0.0989254 | 0.15405265 | -0.642153  | 0.52077382 | NA         |
| Gm826       | 0.17676853 | -0.0989254 | 0.15405265 | -0.642153  | 0.52077382 | NA         |
| 4933417O13I | 0.17676853 | -0.0989254 | 0.15405265 | -0.642153  | 0.52077382 | NA         |
| Gje1        | 0.17676853 | -0.0989254 | 0.15405265 | -0.642153  | 0.52077382 | NA         |
| Mir3066     | 0.17676853 | -0.0989254 | 0.15405265 | -0.642153  | 0.52077382 | NA         |
| 4930447J18R | 0.17676853 | -0.0989254 | 0.15405265 | -0.642153  | 0.52077382 | NA         |
| Atp10b      | 0.17676853 | -0.0989254 | 0.15405265 | -0.642153  | 0.52077382 | NA         |
| Mir192      | 0.17676853 | -0.0989254 | 0.15405265 | -0.642153  | 0.52077382 | NA         |
| 5730460C07F | 0.17676853 | -0.0989254 | 0.15405265 | -0.642153  | 0.52077382 | NA         |
| Spata31d1c  | 0.17676853 | -0.0989254 | 0.15405265 | -0.642153  | 0.52077382 | NA         |
| Gm829       | 0.17676853 | -0.0989254 | 0.15405265 | -0.642153  | 0.52077382 | NA         |
| Helt        | 0.17676853 | -0.0989254 | 0.15405265 | -0.642153  | 0.52077382 | NA         |
| Cpa3        | 0.17676853 | -0.0989254 | 0.15405265 | -0.642153  | 0.52077382 | NA         |
| 4930502A04F | 0.17676853 | -0.0989254 | 0.15405265 | -0.642153  | 0.52077382 | NA         |
| Oprm1       | 0.17676853 | -0.0989254 | 0.15405265 | -0.642153  | 0.52077382 | NA         |
| Clec4b1     | 0.17676853 | -0.0989254 | 0.15405265 | -0.642153  | 0.52077382 | NA         |
| Tbx19       | 0.17676853 | -0.0989254 | 0.15405265 | -0.642153  | 0.52077382 | NA         |
| Trat1       | 0.17676853 | -0.0989254 | 0.15405265 | -0.642153  | 0.52077382 | NA         |
| Atp2b1      | 7985.66689 | -0.0989825 | 0.22695807 | -0.4361267 | 0.66274483 | 0.85628715 |
| Gemin6      | 2511.89988 | -0.09899   | 0.16651629 | -0.5944763 | 0.55219359 | 0.79179683 |
| Fam32a      | 5581.78653 | -0.0990077 | 0.17865574 | -0.5541812 | 0.57945483 | 0.80819901 |
| Mir6992     | 1.05431497 | -0.0990219 | 0.23780657 | -0.4163967 | 0.67711973 | NA         |
| Mospd1      | 671.131223 | -0.0990595 | 0.23311017 | -0.4249473 | 0.67087512 | 0.86150116 |
| Taf7        | 16620.0308 | -0.0991077 | 0.14785331 | -0.6703109 | 0.5026596  | 0.75933521 |
| Hexdc       | 629.846172 | -0.0991556 | 0.18584552 | -0.5335375 | 0.59366154 | 0.81735552 |
| Mpv17l2     | 1274.09575 | -0.0992086 | 0.2221618  | -0.4465603 | 0.6551926  | 0.85234189 |
| Cyb5b       | 20623.2345 | -0.0992287 | 0.20588904 | -0.4819524 | 0.62983975 | 0.83650508 |
| Casc4       | 5495.60634 | -0.0993409 | 0.18064343 | -0.5499283 | 0.58236856 | 0.81000763 |
| Rrad        | 4.87037126 | -0.0995288 | 0.40437483 | -0.2461301 | 0.80558155 | NA         |
| Fam150a     | 2.93539242 | -0.099651  | 0.29867147 | -0.3336475 | 0.73864558 | NA         |
| Rbmxl1      | 3805.76059 | -0.0997276 | 0.17976889 | -0.5547546 | 0.57906255 | 0.80813229 |
| Vps16       | 5043.22717 | -0.0997545 | 0.17765726 | -0.5614995 | 0.57445704 | 0.806724   |

|             |            |            |            |            |            |            |
|-------------|------------|------------|------------|------------|------------|------------|
| Pus1        | 4282.0952  | -0.0997831 | 0.16933682 | -0.5892584 | 0.55568792 | 0.79491334 |
| Pip4k2a     | 1739.92054 | -0.0998058 | 0.24998823 | -0.399242  | 0.6897149  | 0.87272225 |
| Dmgdh       | 3489.61516 | -0.0999181 | 0.43193185 | -0.2313283 | 0.81705976 | 0.93016422 |
| Nnt         | 2655.0728  | -0.1000221 | 0.19147569 | -0.5223748 | 0.60140937 | 0.82154763 |
| Mir93       | 10.5318731 | -0.1000275 | 0.4259486  | -0.2348346 | 0.81433712 | 0.92878688 |
| Ankrd55     | 3.42184891 | -0.1000646 | 0.3411094  | -0.2933504 | 0.76925433 | NA         |
| Taf9b       | 456.43939  | -0.10019   | 0.32881738 | -0.304698  | 0.76059616 | 0.90435844 |
| Wash        | 2282.27362 | -0.1001942 | 0.17114001 | -0.5854517 | 0.55824405 | 0.79658335 |
| Nos3        | 125.017593 | -0.1002266 | 0.35704584 | -0.2807108 | 0.7789322  | 0.9124802  |
| Ece1        | 1705.85269 | -0.1002468 | 0.28194363 | -0.3555561 | 0.72217305 | 0.8872265  |
| Qk          | 19211.5395 | -0.1002974 | 0.21738563 | -0.4613801 | 0.64452593 | 0.84561062 |
| Dusp28      | 286.476966 | -0.1003084 | 0.22480955 | -0.446193  | 0.65545785 | 0.85234189 |
| Vwa9        | 2604.36032 | -0.100321  | 0.1805953  | -0.5555016 | 0.5785516  | 0.80785274 |
| Bbs12       | 321.9685   | -0.1003345 | 0.22314438 | -0.4496394 | 0.65297048 | 0.85087514 |
| Tmem120b    | 643.676748 | -0.1003562 | 0.18052602 | -0.55591   | 0.57827238 | 0.80771125 |
| Zfp110      | 6682.35979 | -0.1005301 | 0.1474397  | -0.6818389 | 0.49534082 | 0.75533199 |
| Crabp2      | 197.010807 | -0.1005592 | 0.3187786  | -0.3154515 | 0.75241889 | 0.90182644 |
| Ufsp2       | 2298.4004  | -0.1005767 | 0.1937675  | -0.5190585 | 0.60371992 | 0.82288924 |
| Orc1        | 7507.02348 | -0.1006011 | 0.19747926 | -0.5094261 | 0.61045358 | 0.82628285 |
| Prss36      | 558.665197 | -0.1006728 | 0.27175287 | -0.3704571 | 0.71104192 | 0.88254552 |
| Kdm5a       | 7331.77122 | -0.1006858 | 0.22305841 | -0.4513876 | 0.65171023 | 0.84981368 |
| 5730480H06l | 91.625417  | -0.1007409 | 0.3166399  | -0.3181561 | 0.7503665  | 0.90095125 |
| Abca7       | 1850.89159 | -0.1008253 | 0.26645176 | -0.3783997 | 0.70513367 | 0.87969669 |
| Tbc1d13     | 14380.9725 | -0.1008432 | 0.24374287 | -0.4137276 | 0.6790736  | 0.86604267 |
| Ikzf1       | 66.7488184 | -0.1008653 | 0.42054149 | -0.2398462 | 0.81044946 | 0.9275573  |
| Psm3        | 11653.9247 | -0.1009094 | 0.19332453 | -0.5219689 | 0.60169201 | 0.82168861 |
| 1700109G14l | 0.69169754 | -0.1009264 | 0.21293582 | -0.4739758 | 0.63551719 | NA         |
| 5430416O09l | 0.69169754 | -0.1009264 | 0.21293582 | -0.4739758 | 0.63551719 | NA         |
| Dcst1       | 4.05473347 | -0.1009315 | 0.35790922 | -0.2820029 | 0.77794126 | NA         |
| Isca2       | 1899.3675  | -0.1010195 | 0.22275368 | -0.4535031 | 0.65018649 | 0.84900546 |
| Atp2c1      | 7495.62573 | -0.1010207 | 0.18764407 | -0.5383634 | 0.59032619 | 0.8154987  |
| Vwa1        | 19.6156968 | -0.1011016 | 0.42609963 | -0.2372722 | 0.81244562 | 0.92872256 |
| Hnrnpm      | 27990.419  | -0.1011453 | 0.18909215 | -0.5348993 | 0.59271952 | 0.81699887 |
| Gm11747     | 1.86258379 | -0.1011542 | 0.26655106 | -0.3794929 | 0.70432189 | NA         |
| Il31        | 0.19609671 | -0.1012097 | 0.15575191 | -0.6498133 | 0.51581281 | NA         |
| 4930430F21F | 0.19609671 | -0.1012097 | 0.15575191 | -0.6498133 | 0.51581281 | NA         |
| 8030443G20l | 0.19609671 | -0.1012097 | 0.15575191 | -0.6498133 | 0.51581281 | NA         |
| Slc22a27    | 0.19609671 | -0.1012097 | 0.15575191 | -0.6498133 | 0.51581281 | NA         |
| Defb3       | 0.19609671 | -0.1012097 | 0.15575191 | -0.6498133 | 0.51581281 | NA         |
| Ankrd7      | 0.19609671 | -0.1012097 | 0.15575191 | -0.6498133 | 0.51581281 | NA         |
| Ppp2r2cos   | 0.19609671 | -0.1012097 | 0.15575191 | -0.6498133 | 0.51581281 | NA         |

|             |            |            |            |            |            |    |
|-------------|------------|------------|------------|------------|------------|----|
| AY761184    | 0.19609671 | -0.1012097 | 0.15575191 | -0.6498133 | 0.51581281 | NA |
| 1700010B08F | 0.19609671 | -0.1012097 | 0.15575191 | -0.6498133 | 0.51581281 | NA |
| Rs1         | 0.19609671 | -0.1012097 | 0.15575191 | -0.6498133 | 0.51581281 | NA |
| Pcdha11     | 0.19609671 | -0.1012097 | 0.15575191 | -0.6498133 | 0.51581281 | NA |
| Chia1       | 0.19609671 | -0.1012097 | 0.15575191 | -0.6498133 | 0.51581281 | NA |
| Prn         | 0.19609671 | -0.1012097 | 0.15575191 | -0.6498133 | 0.51581281 | NA |
| Gm9199      | 0.19609671 | -0.1012097 | 0.15575191 | -0.6498133 | 0.51581281 | NA |
| Tcp10a      | 0.19609671 | -0.1012097 | 0.15575191 | -0.6498133 | 0.51581281 | NA |
| 1810053B23F | 0.19609671 | -0.1012097 | 0.15575191 | -0.6498133 | 0.51581281 | NA |
| Vmn2r50     | 0.19609671 | -0.1012097 | 0.15575191 | -0.6498133 | 0.51581281 | NA |
| 4931419H13I | 0.19609671 | -0.1012097 | 0.15575191 | -0.6498133 | 0.51581281 | NA |
| Gm8765      | 0.19609671 | -0.1012097 | 0.15575191 | -0.6498133 | 0.51581281 | NA |
| Gpr171      | 0.19609671 | -0.1012097 | 0.15575191 | -0.6498133 | 0.51581281 | NA |
| Olfm4       | 0.19609671 | -0.1012097 | 0.15575191 | -0.6498133 | 0.51581281 | NA |
| Mir7006     | 0.19609671 | -0.1012097 | 0.15575191 | -0.6498133 | 0.51581281 | NA |
| 4930465M20  | 0.19609671 | -0.1012097 | 0.15575191 | -0.6498133 | 0.51581281 | NA |
| Olf1392     | 0.19609671 | -0.1012097 | 0.15575191 | -0.6498133 | 0.51581281 | NA |
| Mir6911     | 0.19609671 | -0.1012097 | 0.15575191 | -0.6498133 | 0.51581281 | NA |
| Mir8120     | 0.19609671 | -0.1012097 | 0.15575191 | -0.6498133 | 0.51581281 | NA |
| Pcdhb4      | 0.19609671 | -0.1012097 | 0.15575191 | -0.6498133 | 0.51581281 | NA |
| Olf419      | 0.19609671 | -0.1012097 | 0.15575191 | -0.6498133 | 0.51581281 | NA |
| 2610316D01I | 0.19609671 | -0.1012097 | 0.15575191 | -0.6498133 | 0.51581281 | NA |
| Mir7025     | 0.19609671 | -0.1012097 | 0.15575191 | -0.6498133 | 0.51581281 | NA |
| 4931420L22F | 0.19609671 | -0.1012097 | 0.15575191 | -0.6498133 | 0.51581281 | NA |
| Defa26      | 0.19609671 | -0.1012097 | 0.15575191 | -0.6498133 | 0.51581281 | NA |
| Mir7578     | 0.19609671 | -0.1012097 | 0.15575191 | -0.6498133 | 0.51581281 | NA |
| Kcne4       | 0.19609671 | -0.1012097 | 0.15575191 | -0.6498133 | 0.51581281 | NA |
| Mir5103     | 0.19609671 | -0.1012097 | 0.15575191 | -0.6498133 | 0.51581281 | NA |
| Gm5766      | 0.19609671 | -0.1012097 | 0.15575191 | -0.6498133 | 0.51581281 | NA |
| Mir6538     | 0.19609671 | -0.1012097 | 0.15575191 | -0.6498133 | 0.51581281 | NA |
| Pik3cg      | 0.19609671 | -0.1012097 | 0.15575191 | -0.6498133 | 0.51581281 | NA |
| Kcnk9       | 0.19609671 | -0.1012097 | 0.15575191 | -0.6498133 | 0.51581281 | NA |
| Grpr        | 0.19609671 | -0.1012097 | 0.15575191 | -0.6498133 | 0.51581281 | NA |
| Pcdhac1     | 0.19609671 | -0.1012097 | 0.15575191 | -0.6498133 | 0.51581281 | NA |
| Mir654      | 0.19609671 | -0.1012097 | 0.15575191 | -0.6498133 | 0.51581281 | NA |
| Ifi203      | 0.19609671 | -0.1012097 | 0.15575191 | -0.6498133 | 0.51581281 | NA |
| Gm5901      | 0.19609671 | -0.1012097 | 0.15575191 | -0.6498133 | 0.51581281 | NA |
| Mir709      | 0.19609671 | -0.1012097 | 0.15575191 | -0.6498133 | 0.51581281 | NA |
| Il22        | 0.19609671 | -0.1012097 | 0.15575191 | -0.6498133 | 0.51581281 | NA |
| Xkr4        | 0.19609671 | -0.1012097 | 0.15575191 | -0.6498133 | 0.51581281 | NA |
| 1700123O12I | 0.19609671 | -0.1012097 | 0.15575191 | -0.6498133 | 0.51581281 | NA |

|             |            |            |            |            |            |            |
|-------------|------------|------------|------------|------------|------------|------------|
| Ceacam-ps1  | 0.19609671 | -0.1012097 | 0.15575191 | -0.6498133 | 0.51581281 | NA         |
| Mir1956     | 0.19609671 | -0.1012097 | 0.15575191 | -0.6498133 | 0.51581281 | NA         |
| Rgs1        | 0.19609671 | -0.1012097 | 0.15575191 | -0.6498133 | 0.51581281 | NA         |
| Mir5128     | 0.19609671 | -0.1012097 | 0.15575191 | -0.6498133 | 0.51581281 | NA         |
| Vip         | 0.19609671 | -0.1012097 | 0.15575191 | -0.6498133 | 0.51581281 | NA         |
| Lce3b       | 0.19609671 | -0.1012097 | 0.15575191 | -0.6498133 | 0.51581281 | NA         |
| Mir5622     | 0.19609671 | -0.1012097 | 0.15575191 | -0.6498133 | 0.51581281 | NA         |
| Uts2b       | 0.19609671 | -0.1012097 | 0.15575191 | -0.6498133 | 0.51581281 | NA         |
| Mir376c     | 0.19609671 | -0.1012097 | 0.15575191 | -0.6498133 | 0.51581281 | NA         |
| Gm10536     | 0.19609671 | -0.1012097 | 0.15575191 | -0.6498133 | 0.51581281 | NA         |
| Gm17821     | 0.19609671 | -0.1012097 | 0.15575191 | -0.6498133 | 0.51581281 | NA         |
| Mir7045     | 0.19609671 | -0.1012097 | 0.15575191 | -0.6498133 | 0.51581281 | NA         |
| 4930583K01F | 0.19609671 | -0.1012097 | 0.15575191 | -0.6498133 | 0.51581281 | NA         |
| Aqp2        | 0.19609671 | -0.1012097 | 0.15575191 | -0.6498133 | 0.51581281 | NA         |
| 5730412P04F | 0.19609671 | -0.1012097 | 0.15575191 | -0.6498133 | 0.51581281 | NA         |
| Psmc3ip     | 1987.04989 | -0.1012874 | 0.20368077 | -0.4972852 | 0.61898794 | 0.83090659 |
| Cacna1e     | 6.09373952 | -0.101486  | 0.4225737  | -0.2401617 | 0.81020493 | 0.9275573  |
| Naa15       | 16239.943  | -0.1015315 | 0.20339788 | -0.4991769 | 0.61765477 | 0.83032065 |
| Gtf2b       | 3953.32343 | -0.1015708 | 0.20586667 | -0.4933813 | 0.62174323 | 0.83196874 |
| Cdc26       | 1366.40813 | -0.1015823 | 0.17254491 | -0.5887296 | 0.55604266 | 0.79522766 |
| Olf920      | 0.84198215 | -0.1015933 | 0.19666795 | -0.5165729 | 0.60545432 | NA         |
| Il1rap      | 117.109217 | -0.1016382 | 0.29383285 | -0.3459049 | 0.7294142  | 0.89040454 |
| Napepld     | 3593.32091 | -0.1016855 | 0.20287591 | -0.5012204 | 0.61621604 | 0.83025261 |
| Sin3a       | 14600.2113 | -0.1018922 | 0.19887787 | -0.5123356 | 0.60841618 | 0.82562526 |
| Pde6b       | 32.0011085 | -0.101952  | 0.43214425 | -0.2359213 | 0.81349373 | 0.92878688 |
| Irs2        | 335.784734 | -0.1020201 | 0.33707791 | -0.3026604 | 0.76214869 | 0.90488428 |
| Tmem236     | 2.34205329 | -0.1020383 | 0.32005898 | -0.318811  | 0.7498698  | NA         |
| Plxnb3      | 62.3429771 | -0.1021159 | 0.38959614 | -0.2621072 | 0.79323882 | 0.91954208 |
| Sun2        | 1765.79943 | -0.1021819 | 0.2170733  | -0.4707251 | 0.63783704 | 0.84137221 |
| Trnau1ap    | 3388.89365 | -0.1022727 | 0.30526713 | -0.335027  | 0.73760475 | 0.89417614 |
| H2-K1       | 2494.71582 | -0.1023136 | 0.27175487 | -0.3764921 | 0.70655112 | 0.88063557 |
| Morc1       | 18886.9416 | -0.1023465 | 0.2068241  | -0.4948479 | 0.62070751 | 0.83162079 |
| Sgsh        | 361.47328  | -0.1023686 | 0.34345193 | -0.2980579 | 0.765659   | 0.90618168 |
| Rnase4      | 101.14624  | -0.1023692 | 0.42735438 | -0.2395418 | 0.8106855  | 0.92759696 |
| Zbtb33      | 1421.26993 | -0.1024691 | 0.22645048 | -0.4525011 | 0.65090804 | 0.84925505 |
| Casp2       | 2467.8168  | -0.1025556 | 0.16849392 | -0.6086606 | 0.5427494  | 0.78543607 |
| Zfp786      | 258.436531 | -0.1025603 | 0.24186416 | -0.4240408 | 0.67153603 | 0.86170945 |
| Runx1       | 28.7057555 | -0.1026955 | 0.41402396 | -0.2480425 | 0.80410155 | 0.92388669 |
| Gpt         | 318.023333 | -0.1027512 | 0.2619629  | -0.3922357 | 0.69488406 | 0.87513298 |
| Prkacb      | 3301.96576 | -0.1027693 | 0.21643945 | -0.4748176 | 0.63491696 | 0.83934241 |
| Szrd1       | 6037.30724 | -0.1028031 | 0.20362146 | -0.5048737 | 0.61364752 | 0.82850171 |

|             |            |            |            |            |            |            |
|-------------|------------|------------|------------|------------|------------|------------|
| Sympk       | 8988.0486  | -0.1028172 | 0.18414495 | -0.5583493 | 0.5766059  | 0.80734073 |
| Med6        | 3210.50629 | -0.102856  | 0.17758638 | -0.5791888 | 0.56246177 | 0.79942162 |
| Myadm       | 9167.65469 | -0.1028644 | 0.18254619 | -0.563498  | 0.57309579 | 0.80618651 |
| Nip7        | 10271.066  | -0.1029187 | 0.21983059 | -0.4681727 | 0.63966106 | 0.84238903 |
| Tcf23       | 4.70917505 | -0.1029355 | 0.35378552 | -0.2909545 | 0.77108609 | NA         |
| Trap1a      | 14868.3553 | -0.1029492 | 0.16823375 | -0.6119413 | 0.54057662 | 0.7844818  |
| Smarca5     | 25859.8765 | -0.1030089 | 0.20934101 | -0.4920629 | 0.62267489 | 0.83247791 |
| Phb         | 3960.93909 | -0.1030133 | 0.20529315 | -0.5017865 | 0.61581769 | 0.82990514 |
| 3930402G23I | 0.6845418  | -0.1030267 | 0.21251001 | -0.4848087 | 0.62781202 | NA         |
| Itgad       | 0.6845418  | -0.1030267 | 0.21251001 | -0.4848087 | 0.62781202 | NA         |
| Chaf1b      | 8479.15837 | -0.1031624 | 0.18155543 | -0.5682144 | 0.56988936 | 0.80449796 |
| Tcf25       | 13093.2418 | -0.1033288 | 0.20874333 | -0.4950038 | 0.62059741 | 0.83154492 |
| Elp5        | 4397.73457 | -0.1033882 | 0.21342862 | -0.4844159 | 0.62809073 | 0.83553798 |
| Pla2g12b    | 24.0469749 | -0.1035426 | 0.43203139 | -0.2396644 | 0.81059042 | 0.9275573  |
| Efcab9      | 0.80735106 | -0.1035461 | 0.19641863 | -0.5271702 | 0.59807537 | NA         |
| Hist2h3b    | 0.80735106 | -0.1035461 | 0.19641863 | -0.5271702 | 0.59807537 | NA         |
| Ppp1cc      | 8409.77882 | -0.1036031 | 0.14693183 | -0.7051096 | 0.48074201 | 0.74425276 |
| Exosc6      | 2339.53435 | -0.1036295 | 0.22118086 | -0.4685282 | 0.63940691 | 0.84236323 |
| Cxcl16      | 99.0074869 | -0.1037619 | 0.36165145 | -0.2869114 | 0.77418016 | 0.90992938 |
| Pde12       | 2919.86072 | -0.103796  | 0.16220556 | -0.6399041 | 0.52223494 | 0.77084692 |
| Dgkb        | 4.14624563 | -0.1038811 | 0.35574168 | -0.2920126 | 0.77027696 | NA         |
| Avl9        | 3964.50223 | -0.1039089 | 0.17906693 | -0.5802798 | 0.56172594 | 0.79905798 |
| Siah1b      | 2227.62269 | -0.1039094 | 0.20778954 | -0.5000704 | 0.61702551 | 0.83032065 |
| 1700044C05F | 1.72767575 | -0.1039834 | 0.23190558 | -0.4483868 | 0.65387408 | NA         |
| Cep78       | 3369.11614 | -0.1040308 | 0.18007485 | -0.5777085 | 0.56346095 | 0.79999829 |
| Otud5       | 4920.58051 | -0.1042024 | 0.16088418 | -0.6476861 | 0.51718799 | 0.76794869 |
| Dram2       | 1580.64557 | -0.1042044 | 0.25224131 | -0.4131141 | 0.67952303 | 0.86624007 |
| Rgs12       | 1066.35043 | -0.1042611 | 0.21300647 | -0.4894739 | 0.62450625 | 0.8333359  |
| Mrm1        | 1405.59443 | -0.1043694 | 0.16922826 | -0.6167376 | 0.53740785 | 0.78126853 |
| Gltscr1l    | 6429.80909 | -0.1044608 | 0.24000669 | -0.435241  | 0.66338749 | 0.85662533 |
| Tsc2        | 6054.07669 | -0.1044991 | 0.24360894 | -0.4289626 | 0.66795045 | 0.85951986 |
| Ugp2        | 3971.68264 | -0.1045852 | 0.1857399  | -0.5630734 | 0.57338488 | 0.80635813 |
| Pcnxl4      | 1163.52764 | -0.1045943 | 0.20336131 | -0.5143272 | 0.60702325 | 0.82472642 |
| Shisa6      | 3.03705974 | -0.1046209 | 0.32957533 | -0.3174414 | 0.7509087  | NA         |
| Clk4        | 2860.18943 | -0.1046658 | 0.18012846 | -0.5810619 | 0.56119874 | 0.79905798 |
| Gpr110      | 4.48056724 | -0.1046838 | 0.35495643 | -0.2949201 | 0.7680549  | NA         |
| Sftpd       | 6.96933792 | -0.1047422 | 0.41337577 | -0.2533825 | 0.79997268 | 0.92248631 |
| Tsx         | 271.268713 | -0.1047435 | 0.40443682 | -0.258986  | NA         | NA         |
| B3galnt2    | 3222.25602 | -0.1048007 | 0.22279258 | -0.4703959 | 0.63807219 | 0.84154531 |
| Inca1       | 104.227485 | -0.104862  | 0.41739734 | -0.2512282 | 0.8016377  | 0.92325551 |
| Clec4e      | 1.2247562  | -0.1050476 | 0.18544566 | -0.5664601 | 0.57108105 | NA         |

|             |            |            |            |            |            |            |
|-------------|------------|------------|------------|------------|------------|------------|
| Eogt        | 1107.76363 | -0.1050539 | 0.34020091 | -0.3087997 | 0.75747389 | 0.90301693 |
| Tada1       | 739.578822 | -0.1051924 | 0.23883631 | -0.4404374 | 0.65962036 | 0.854457   |
| Cd80        | 714.350694 | -0.1052069 | 0.26997677 | -0.3896887 | 0.69676672 | 0.87643932 |
| Trpm7       | 13498.3032 | -0.1054277 | 0.21810818 | -0.4833732 | 0.62883076 | 0.83602181 |
| Tbc1d20     | 1741.48551 | -0.10544   | 0.19724327 | -0.5345681 | 0.59294855 | 0.81705522 |
| Zfp709      | 430.051315 | -0.1054409 | 0.26060221 | -0.4046049 | 0.68576792 | 0.87013519 |
| Gtdc1       | 1070.13127 | -0.1054631 | 0.19830999 | -0.5318092 | 0.59485817 | 0.81794822 |
| Olfr288     | 0.89054733 | -0.1055249 | 0.19958899 | -0.5287109 | 0.59700604 | NA         |
| Clec2h      | 0.89054733 | -0.1055249 | 0.19958899 | -0.5287109 | 0.59700604 | NA         |
| Mrpl39      | 6370.19238 | -0.1055604 | 0.16600026 | -0.6359049 | 0.5248384  | 0.77262188 |
| St13        | 29105.1614 | -0.1055646 | 0.16997915 | -0.6210446 | 0.53457025 | 0.77984269 |
| Rap1a       | 2089.52005 | -0.1056273 | 0.21408592 | -0.4933873 | 0.62173894 | 0.83196874 |
| Qrsl1       | 2087.50977 | -0.1057552 | 0.17099853 | -0.6184568 | 0.53627424 | 0.78076585 |
| Cep250      | 3874.14241 | -0.1058381 | 0.1933763  | -0.5473167 | 0.58416119 | 0.81141028 |
| Grip2       | 35.3329076 | -0.1058874 | 0.43019988 | -0.2461353 | 0.80557751 | 0.92460963 |
| Pdik1l      | 1474.8232  | -0.1059259 | 0.22711488 | -0.466398  | 0.64093061 | 0.84338398 |
| Prkrir      | 4450.35084 | -0.1059586 | 0.20747757 | -0.5106988 | 0.60956195 | 0.82596491 |
| Asb10       | 14.4577803 | -0.1060145 | 0.43059921 | -0.2462022 | 0.80552575 | 0.92460963 |
| B230119M05  | 1.72898636 | -0.1061474 | 0.2957463  | -0.3589135 | 0.71965977 | NA         |
| Cdc25b      | 2001.34171 | -0.1061628 | 0.24069314 | -0.441071  | 0.65916157 | 0.85421847 |
| Pip4k2b     | 7056.11395 | -0.1061843 | 0.20471677 | -0.5186889 | 0.60397774 | 0.82288924 |
| Epb4.1l4a   | 3750.76809 | -0.1064825 | 0.27406152 | -0.388535  | 0.69762019 | 0.87645821 |
| Shmt1       | 12693.0669 | -0.1065156 | 0.23461425 | -0.4540031 | 0.64982658 | 0.84900546 |
| Gm12359     | 11.618641  | -0.106669  | 0.43227023 | -0.2467646 | 0.80509039 | 0.92432342 |
| Naa30       | 4452.27557 | -0.1067407 | 0.20188352 | -0.5287242 | 0.59699677 | 0.81955304 |
| Mir6924     | 1.52618495 | -0.1067483 | 0.25181704 | -0.4239121 | 0.67162995 | NA         |
| Rnf5        | 2834.81247 | -0.106797  | 0.22925224 | -0.4658493 | 0.64132337 | 0.84346082 |
| Rpl39       | 18751.1064 | -0.1068068 | 0.2458228  | -0.4344871 | 0.66393478 | 0.85695694 |
| Sgcz        | 119.826738 | -0.1068202 | 0.1903246  | -0.5612527 | NA         | NA         |
| Rbbp9       | 2374.19918 | -0.1068468 | 0.15930814 | -0.6706926 | 0.50241638 | 0.75924357 |
| Gm7977      | 0.67199197 | -0.1068688 | 0.21175951 | -0.5046706 | 0.61379021 | NA         |
| Mir1192     | 0.67199197 | -0.1068688 | 0.21175951 | -0.5046706 | 0.61379021 | NA         |
| Swi5        | 13695.6978 | -0.1069152 | 0.21431415 | -0.4988713 | 0.61787008 | 0.83032275 |
| Nhsl1       | 2204.60127 | -0.1069333 | 0.18101574 | -0.5907406 | 0.55469424 | 0.79393007 |
| Mir6948     | 3.27206629 | -0.1070238 | 0.37604317 | -0.2846051 | 0.77594668 | NA         |
| Otub2       | 411.833767 | -0.1070363 | 0.26191868 | -0.4086623 | 0.68278753 | 0.86812434 |
| Ranbp6      | 1688.20411 | -0.1071422 | 0.21224186 | -0.5048116 | 0.61369116 | 0.82850171 |
| 2900026A02f | 932.416545 | -0.1071765 | 0.20936796 | -0.5119051 | 0.60871741 | 0.82562526 |
| Cxcl3       | 0.88339158 | -0.1072364 | 0.19933144 | -0.5379801 | 0.59059077 | NA         |
| Dclre1a     | 1471.48421 | -0.1073342 | 0.20639374 | -0.5200458 | 0.60303168 | 0.82253711 |
| Cml2        | 24.0686687 | -0.1074959 | 0.42902054 | -0.2505613 | 0.80215334 | 0.92349342 |

|             |            |            |            |            |            |            |
|-------------|------------|------------|------------|------------|------------|------------|
| Taf2        | 6417.59298 | -0.1076128 | 0.19725341 | -0.545556  | 0.58537116 | 0.81209791 |
| Eif4g1      | 57401.022  | -0.1076799 | 0.21880364 | -0.4921303 | 0.62262726 | 0.83247791 |
| Apobec3     | 14338.5821 | -0.1076977 | 0.2266896  | -0.4750889 | 0.63472362 | 0.83934241 |
| Ppp6c       | 5257.06516 | -0.1077282 | 0.1655088  | -0.6508909 | 0.51511695 | 0.76651865 |
| Col8a2      | 3.627026   | -0.1077307 | 0.37853854 | -0.2845965 | 0.77595333 | NA         |
| Gm6812      | 1.35106603 | -0.1077784 | 0.28369992 | -0.3799027 | 0.70401761 | NA         |
| Taldo1      | 20534.0433 | -0.10781   | 0.20502426 | -0.5258402 | 0.59899927 | 0.8200579  |
| Arl5a       | 3793.81333 | -0.1078608 | 0.23673855 | -0.4556115 | 0.6486694  | 0.84862854 |
| Zfp11       | 1554.65929 | -0.1078988 | 0.20249043 | -0.5328587 | 0.59413141 | 0.81764049 |
| Gm5083      | 3.62515229 | -0.107918  | 0.38086901 | -0.2833468 | 0.77691102 | NA         |
| Slc16a10    | 289.981463 | -0.1079261 | 0.33674335 | -0.3204996 | 0.74858962 | 0.900659   |
| Psph        | 4469.51633 | -0.1079679 | 0.19757973 | -0.5464524 | 0.58475498 | 0.81170442 |
| Eftud1      | 2865.31818 | -0.1080047 | 0.20215163 | -0.5342755 | 0.59315096 | 0.81705522 |
| Arhgap39    | 1466.71166 | -0.108118  | 0.26203894 | -0.4126028 | 0.67989765 | 0.86642486 |
| Angel1      | 1394.7865  | -0.108121  | 0.2047722  | -0.5280064 | 0.59749493 | 0.81965805 |
| Ankk1       | 20.5399819 | -0.1082813 | 0.41929277 | -0.2582475 | 0.79621591 | 0.92066778 |
| Rfwd2       | 1813.84363 | -0.1083388 | 0.17726122 | -0.6111818 | 0.54107923 | 0.7846986  |
| Zc3h13      | 5761.60663 | -0.1084463 | 0.19371792 | -0.5598155 | 0.5756053  | 0.80714793 |
| Rap1gap2    | 1114.46007 | -0.1084934 | 0.34866601 | -0.3111671 | 0.7556736  | 0.90203956 |
| Cabp1       | 1020.04961 | -0.1086046 | 0.2747013  | -0.3953551 | 0.69258082 | 0.8746012  |
| Gabbrb3     | 1184.68514 | -0.1086559 | 0.21929811 | -0.495471  | 0.62026769 | 0.83138967 |
| Mir142      | 3.53539208 | -0.1086728 | 0.34106598 | -0.318627  | 0.75000941 | NA         |
| Zic2        | 3034.17381 | -0.1087748 | 0.35979674 | -0.3023229 | 0.7624059  | 0.90498047 |
| Bcas3       | 4971.34066 | -0.1088196 | 0.28591702 | -0.3805986 | 0.70350108 | 0.87928906 |
| Cpd         | 2630.12844 | -0.1089008 | 0.20938209 | -0.5201057 | 0.60298987 | 0.82253711 |
| Zfr         | 11518.1021 | -0.1089641 | 0.17823726 | -0.6113429 | 0.54097258 | 0.7846986  |
| Gdf10       | 0.84600743 | -0.1090423 | 0.19909404 | -0.5476923 | 0.5839032  | NA         |
| Tm7sf3      | 9317.16909 | -0.1091556 | 0.20127818 | -0.5423121 | 0.58760355 | 0.81340776 |
| Psm4        | 14042.844  | -0.1091597 | 0.16121876 | -0.6770907 | 0.49834838 | 0.75670871 |
| Hey2        | 27.611679  | -0.1091631 | 0.42724931 | -0.255502  | 0.79833536 | 0.92164102 |
| A730008H23  | 1.00337411 | -0.1091742 | 0.26190194 | -0.4168514 | 0.67678713 | NA         |
| Sugt1       | 15782.6226 | -0.1091941 | 0.18330845 | -0.5956848 | 0.55138581 | 0.79108781 |
| Trim27      | 7344.32382 | -0.1092283 | 0.18144272 | -0.6019987 | 0.54717498 | 0.78821846 |
| Dmap1       | 2466.47857 | -0.1092905 | 0.18660982 | -0.5856634 | 0.55810174 | 0.79653452 |
| Anks6       | 53.0545699 | -0.1093035 | 0.39730438 | -0.2751128 | 0.78322958 | 0.91414013 |
| Hp1bp3      | 3208.09352 | -0.1093983 | 0.17055097 | -0.6414406 | 0.52123648 | 0.77003139 |
| Mir5619     | 1.10410212 | -0.1094375 | 0.23912998 | -0.4576486 | 0.64720491 | NA         |
| Ndfip1      | 3205.32935 | -0.109486  | 0.19918342 | -0.5496741 | 0.58254295 | 0.81000763 |
| 1700109H08I | 49.5848183 | -0.1094879 | 0.39030149 | -0.2805214 | 0.7790775  | 0.91248318 |
| Nmi         | 247.173982 | -0.1095186 | 0.36378352 | -0.3010544 | 0.76337301 | 0.90530857 |
| Odf3b       | 9.92272418 | -0.1095791 | 0.41259296 | -0.2655864 | 0.79055779 | 0.91821377 |



|             |            |            |            |            |            |            |
|-------------|------------|------------|------------|------------|------------|------------|
| Prpsap1     | 5121.70247 | -0.1096283 | 0.23406944 | -0.468358  | 0.63952862 | 0.84238903 |
| Rps29       | 51908.9129 | -0.109655  | 0.20635493 | -0.5313901 | 0.59514851 | 0.81809904 |
| Nucks1      | 42171.1508 | -0.1096886 | 0.1796795  | -0.610468  | 0.54155183 | 0.78492088 |
| Dazap2      | 6646.87924 | -0.1096962 | 0.16696906 | -0.6569851 | 0.51119048 | 0.76501865 |
| Garnl3      | 1389.84918 | -0.1097188 | 0.19758357 | -0.5553034 | 0.57868718 | 0.80792967 |
| Tram1       | 8009.78888 | -0.1097614 | 0.15459295 | -0.7100024 | 0.47770268 | 0.7424775  |
| C1galt1c1   | 660.68139  | -0.1097627 | 0.17783227 | -0.6172261 | 0.5370856  | 0.78110674 |
| Slc52a2     | 1061.04517 | -0.109774  | 0.21595163 | -0.5083268 | 0.61122418 | 0.82675021 |
| Ermard      | 513.975815 | -0.1098873 | 0.19362882 | -0.5675153 | 0.57036414 | 0.80487644 |
| Ube2i       | 4737.7851  | -0.1098913 | 0.1564862  | -0.7022428 | 0.48252778 | 0.74514925 |
| 1110004F10F | 6103.25501 | -0.1099333 | 0.15961017 | -0.6887611 | 0.49097363 | 0.75185702 |
| Polr3e      | 4435.46706 | -0.110055  | 0.16412936 | -0.6705379 | 0.50251496 | 0.7592526  |
| Hist1h4i    | 27.9320247 | -0.1101178 | 0.42796752 | -0.2573042 | 0.79694396 | 0.92088538 |
| Acadsb      | 2672.97757 | -0.1101436 | 0.1762325  | -0.6249904 | 0.53197736 | 0.77840121 |
| 9030619P08F | 1.37854137 | -0.1101968 | 0.2843831  | -0.3874941 | 0.69839046 | NA         |
| Slamf6      | 64.8821632 | -0.1102144 | 0.35280088 | -0.3123983 | 0.75473784 | 0.90191816 |
| 14-Sep      | 0.90987551 | -0.1102732 | 0.20263615 | -0.5441932 | 0.58630852 | NA         |
| Mon2        | 4200.76876 | -0.1102878 | 0.20917487 | -0.5272514 | 0.598019   | 0.81984777 |
| Bicd2       | 2340.006   | -0.1103455 | 0.1544616  | -0.7143881 | 0.47498724 | 0.7406365  |
| Mir7041     | 0.87084176 | -0.1103474 | 0.19888371 | -0.5548336 | 0.57900848 | NA         |
| C87977      | 0.87084176 | -0.1103474 | 0.19888371 | -0.5548336 | 0.57900848 | NA         |
| Atp5f1      | 22232.7337 | -0.1103619 | 0.16255182 | -0.6789339 | 0.49717977 | 0.75614418 |
| Coil        | 5545.13702 | -0.1104217 | 0.17586128 | -0.627891  | 0.53007534 | 0.7772206  |
| Spast       | 4616.58021 | -0.1104881 | 0.2146588  | -0.5147149 | 0.60675226 | 0.82457436 |
| Col10a1     | 2.45295544 | -0.1105031 | 0.316108   | -0.349574  | 0.72665846 | NA         |
| Ccdc77      | 3772.92438 | -0.1105049 | 0.16957995 | -0.6516387 | 0.51463425 | 0.76641122 |
| Bag3        | 1563.64478 | -0.1105185 | 0.4315299  | -0.2561087 | 0.79786693 | 0.92147261 |
| 4932418E24F | 0.92920369 | -0.1105794 | 0.20190866 | -0.5476703 | 0.5839183  | NA         |
| Gm19424     | 0.92920369 | -0.1105794 | 0.20190866 | -0.5476703 | 0.5839183  | NA         |
| Tnip3       | 0.92920369 | -0.1105794 | 0.20190866 | -0.5476703 | 0.5839183  | NA         |
| Mir7037     | 0.92920369 | -0.1105794 | 0.20190866 | -0.5476703 | 0.5839183  | NA         |
| Capn7       | 4301.66403 | -0.1105995 | 0.17743068 | -0.6233389 | 0.53306181 | 0.77898001 |
| Nme1        | 12879.6568 | -0.1106111 | 0.21048669 | -0.5255018 | 0.59923438 | 0.8201599  |
| Mt4         | 27.598767  | -0.1107384 | 0.41435348 | -0.2672558 | 0.78927224 | 0.91766475 |
| Grwd1       | 4623.74055 | -0.1107516 | 0.23849317 | -0.4643804 | 0.64237524 | 0.84421342 |
| Hars        | 7337.9994  | -0.1107621 | 0.16963026 | -0.652962  | 0.51378075 | 0.76592775 |
| Psemb10     | 726.781018 | -0.110822  | 0.35083704 | -0.3158787 | 0.75209456 | 0.90175963 |
| Socs6       | 2052.80385 | -0.1108786 | 0.15804087 | -0.7015817 | 0.48294004 | 0.74557735 |
| Rad17       | 4085.67943 | -0.1108832 | 0.15105126 | -0.7340764 | 0.46290217 | 0.73275933 |
| Zfc3h1      | 4313.01318 | -0.1109473 | 0.19730252 | -0.5623208 | 0.57389748 | 0.80652888 |
| Tmem218     | 529.537646 | -0.1110183 | 0.22554742 | -0.492217  | 0.62256595 | 0.83247791 |

|             |            |            |            |            |            |            |
|-------------|------------|------------|------------|------------|------------|------------|
| Mrpl10      | 5627.10944 | -0.1110933 | 0.20174887 | -0.5506515 | 0.58187257 | 0.80994453 |
| Pa2g4       | 39585.4049 | -0.1111138 | 0.19939207 | -0.557263  | 0.57734774 | 0.80734073 |
| Camk1g      | 2.01281019 | -0.1111294 | 0.31629613 | -0.3513461 | 0.72532869 | NA         |
| Mir5119     | 1.30834599 | -0.1111695 | 0.2238237  | -0.4966834 | 0.6194123  | NA         |
| Fam178a     | 6344.02201 | -0.1111915 | 0.24335049 | -0.4569192 | 0.64772911 | 0.84806214 |
| Reep4       | 1716.99435 | -0.1112043 | 0.2310998  | -0.4811959 | 0.63037728 | 0.83693308 |
| Adipor2     | 13063.1607 | -0.111214  | 0.1916365  | -0.5803385 | 0.56168634 | 0.79905798 |
| Mir126      | 1.09694637 | -0.11122   | 0.23893134 | -0.4654893 | 0.64158111 | NA         |
| Katna1      | 4094.87854 | -0.1112644 | 0.16804531 | -0.6621097 | 0.50790089 | 0.76297979 |
| Llgl1       | 6639.80105 | -0.1112841 | 0.22689547 | -0.4904643 | 0.62380538 | 0.83275796 |
| Clec2g      | 1.85080059 | -0.1113683 | 0.23309662 | -0.4777772 | 0.63280879 | NA         |
| Grb10       | 4604.74829 | -0.111394  | 0.30919263 | -0.3602737 | 0.71864245 | 0.88550762 |
| Hspa13      | 2273.6155  | -0.1114692 | 0.17442206 | -0.6390773 | 0.52277265 | 0.77123968 |
| Etohi1      | 1386.06835 | -0.1115367 | 0.30188867 | -0.3694631 | 0.71178256 | 0.88328896 |
| Eif3g       | 13479.9359 | -0.1115675 | 0.18010545 | -0.6194564 | 0.53561573 | 0.7803571  |
| Dolpp1      | 2639.06235 | -0.1115774 | 0.1984353  | -0.562286  | 0.5739212  | 0.80652888 |
| Prpf4       | 6961.59302 | -0.1116167 | 0.19250653 | -0.5798073 | 0.56204454 | 0.79915468 |
| Bet1        | 1583.48968 | -0.1117606 | 0.20012931 | -0.5584421 | 0.5765425  | 0.80734073 |
| Tctex1d2    | 1367.48009 | -0.1117751 | 0.28026418 | -0.3988207 | 0.69002536 | 0.87290201 |
| Rab37       | 116.750488 | -0.1118045 | 0.38900908 | -0.2874084 | 0.77379963 | 0.9098882  |
| Dnmt3aos    | 0.90271977 | -0.1120238 | 0.2023888  | -0.5535081 | 0.57991556 | NA         |
| Msrb1       | 1801.15352 | -0.112047  | 0.21415358 | -0.5232084 | 0.60082922 | 0.82140617 |
| D930015E06f | 2455.94131 | -0.1120886 | 0.21344931 | -0.5251299 | 0.59949288 | 0.8202282  |
| Med9        | 1887.00949 | -0.1121419 | 0.22551245 | -0.4972757 | 0.61899465 | 0.83090659 |
| Cd2bp2      | 9097.16347 | -0.1122058 | 0.17060753 | -0.6576838 | 0.51074134 | 0.76473508 |
| Pccb        | 2534.24945 | -0.1122487 | 0.202579   | -0.5540983 | 0.57951157 | 0.80819901 |
| Tfb2m       | 512.007913 | -0.1122557 | 0.23462198 | -0.4784533 | 0.6323276  | 0.8380914  |
| Nsmce1      | 3922.72113 | -0.1122662 | 0.23156976 | -0.4848053 | 0.62781447 | 0.83543543 |
| Gm14499     | 6.06437766 | -0.1122731 | 0.29010857 | -0.3870037 | 0.69875347 | 0.87709381 |
| Polr2m      | 17059.6301 | -0.1123044 | 0.18169751 | -0.6180843 | 0.53651977 | 0.78079716 |
| Tac4        | 0.92204795 | -0.1123108 | 0.2016765  | -0.5568858 | 0.57760548 | NA         |
| Fam13b      | 1796.3803  | -0.1123496 | 0.29067171 | -0.3865173 | 0.69911362 | 0.87733343 |
| Svil        | 2202.96651 | -0.1124022 | 0.2411046  | -0.4661966 | 0.64107476 | 0.84343093 |
| Ap3b1       | 13179.398  | -0.1125151 | 0.17134132 | -0.6566723 | 0.51139168 | 0.76501865 |
| Epn1        | 3206.30592 | -0.1125418 | 0.23140159 | -0.4863485 | 0.62672008 | 0.83469537 |
| Htr5b       | 17.609203  | -0.112644  | 0.42993202 | -0.2620042 | 0.79331818 | 0.91954293 |
| Oas1e       | 7.22344411 | -0.1127312 | 0.32734295 | -0.3443826 | 0.7305586  | 0.89091255 |
| Retn        | 1.33042724 | -0.1127581 | 0.22384929 | -0.5037232 | 0.61445593 | NA         |
| Usp32       | 4362.44864 | -0.1127996 | 0.23684699 | -0.4762551 | 0.63389262 | 0.83920768 |
| Cenpt       | 4771.22133 | -0.1128799 | 0.20021029 | -0.5638069 | 0.57288557 | 0.80618651 |
| Pcx         | 1913.32884 | -0.1128939 | 0.22545437 | -0.5007394 | 0.61655452 | 0.83032065 |

|             |            |            |            |            |            |            |
|-------------|------------|------------|------------|------------|------------|------------|
| A530064D06  | 1.79617705 | -0.113102  | 0.24030838 | -0.4706537 | 0.63788806 | NA         |
| Gm10069     | 481.982476 | -0.1131601 | 0.25194887 | -0.4491391 | 0.65333129 | 0.85120266 |
| Siglec1     | 16.3061638 | -0.1131652 | 0.42581964 | -0.2657585 | 0.79042518 | 0.91812832 |
| Gm11127     | 1.33136046 | -0.1131766 | 0.28336766 | -0.3993984 | 0.68959964 | NA         |
| Cd46        | 3.41396709 | -0.113191  | 0.36496306 | -0.3101438 | 0.75645159 | NA         |
| Capza1      | 2975.21463 | -0.1132274 | 0.25486737 | -0.4442601 | 0.65685453 | 0.85275541 |
| Fscn2       | 8.22020561 | -0.1132787 | 0.42045188 | -0.2694214 | 0.78760544 | 0.91670176 |
| Chtf8       | 8298.53548 | -0.1133651 | 0.17880929 | -0.634     | 0.5260808  | 0.77391756 |
| Tsen54      | 1951.59799 | -0.1134137 | 0.20297488 | -0.5587571 | 0.57632752 | 0.80734073 |
| Mblac1      | 120.792908 | -0.1134498 | 0.33274127 | -0.3409551 | 0.73313738 | 0.8924477  |
| Mllt1       | 2355.08174 | -0.1136311 | 0.17302955 | -0.6567151 | 0.51136415 | 0.76501865 |
| Agpat1      | 4155.22211 | -0.1136944 | 0.2109896  | -0.5388624 | 0.58998184 | 0.81524858 |
| Ahcyl1      | 8503.88047 | -0.1138001 | 0.20416486 | -0.5573932 | 0.57725879 | 0.80734073 |
| 1810012K16F | 4.57921005 | -0.1139023 | 0.38718503 | -0.2941805 | 0.76862002 | NA         |
| Tspan17     | 591.981612 | -0.113938  | 0.20249359 | -0.5626746 | 0.57365649 | 0.8065213  |
| Dusp18      | 274.363719 | -0.1139933 | 0.27478711 | -0.4148422 | 0.67825744 | 0.86571263 |
| Lrrc15      | 1162.45749 | -0.1140338 | 0.37447729 | -0.3045146 | 0.76073587 | 0.90435844 |
| 1700009P17F | 68.7314867 | -0.1140747 | 0.39933697 | -0.2856602 | 0.7751384  | 0.91029675 |
| Galr1       | 2.69893521 | -0.1141106 | 0.25796092 | -0.4423561 | 0.65823153 | NA         |
| Pex5l       | 2.68785896 | -0.1141592 | 0.35686617 | -0.3198935 | 0.7490491  | NA         |
| D19Bwg1357  | 13341.4239 | -0.1143974 | 0.15992659 | -0.7153117 | 0.47441644 | 0.74043056 |
| Gm5113      | 342.498865 | -0.1144225 | 0.26254733 | -0.4358168 | 0.66296966 | 0.85644136 |
| Abca8a      | 1.16521712 | -0.1144953 | 0.24506267 | -0.4672083 | 0.64035083 | NA         |
| Poldip3     | 13536.4149 | -0.1145308 | 0.15880679 | -0.7211956 | 0.47078918 | 0.73825174 |
| Zscan18     | 1018.93252 | -0.1145819 | 0.24321478 | -0.4711139 | 0.63755938 | 0.84125743 |
| Ran         | 38486.9321 | -0.1146023 | 0.17481216 | -0.6555741 | 0.51209819 | 0.76528308 |
| Chrd        | 263.401976 | -0.114619  | 0.30210654 | -0.3793994 | 0.70439132 | 0.87942876 |
| Klhl2       | 3578.33999 | -0.1147258 | 0.19230375 | -0.5965864 | 0.55078352 | 0.79097822 |
| Pxmp4       | 641.230228 | -0.114737  | 0.23573509 | -0.4867202 | 0.62645664 | 0.83466421 |
| Tnfsf4      | 1.92392935 | -0.1147524 | 0.27661072 | -0.4148515 | 0.67825065 | NA         |
| Hist1h2bb   | 10.320298  | -0.1149645 | 0.42967379 | -0.2675622 | 0.78903636 | 0.91761175 |
| 1700001J03R | 2.40450232 | -0.1149956 | 0.32306013 | -0.3559571 | 0.72187266 | NA         |
| Ddost       | 12181.5846 | -0.1150813 | 0.18943324 | -0.6075035 | 0.54351684 | 0.78603486 |
| Ppip5k1     | 2202.58989 | -0.1151054 | 0.18420282 | -0.624884  | 0.53204722 | 0.77842377 |
| Noc3l       | 6152.70056 | -0.1151303 | 0.17705482 | -0.6502521 | 0.5155294  | 0.76688328 |
| Aire        | 605.654337 | -0.1151313 | 0.39362619 | -0.2924889 | 0.76991286 | 0.90807091 |
| Mettl8      | 1151.01805 | -0.1151991 | 0.16997755 | -0.6777314 | 0.49794202 | 0.75642242 |
| Mir3060     | 6.88200265 | -0.1153386 | 0.40372795 | -0.285684  | 0.77512016 | 0.91029675 |
| Plekhm1     | 4147.68167 | -0.1154382 | 0.24203992 | -0.4769389 | 0.63340566 | 0.8388768  |
| Rce1        | 1552.35745 | -0.1154939 | 0.18031746 | -0.6405033 | 0.52184546 | 0.77067604 |
| Pikfyve     | 5160.09287 | -0.1155286 | 0.18754487 | -0.6160051 | 0.53789113 | 0.78149754 |

|         |            |            |            |            |            |            |
|---------|------------|------------|------------|------------|------------|------------|
| Cep164  | 4139.74556 | -0.1155361 | 0.1917119  | -0.6026547 | 0.54673843 | 0.7879093  |
| Fam49a  | 659.323227 | -0.1155441 | 0.36011579 | -0.3208528 | 0.74832197 | 0.90063888 |
| Baat    | 3.24696663 | -0.1156537 | 0.37952777 | -0.3047306 | 0.76057133 | NA         |
| Cbl     | 2021.58454 | -0.1156578 | 0.35681593 | -0.3241387 | 0.74583305 | 0.89889559 |
| Pnlnc1  | 1312.32539 | -0.1156674 | 0.20143778 | -0.5742092 | 0.56582622 | 0.80174611 |
| Smarcc1 | 25256.6684 | -0.1156677 | 0.2032947  | -0.5689655 | 0.56937956 | 0.80418512 |
| Usp37   | 8722.78589 | -0.1157817 | 0.18304244 | -0.6325401 | 0.52703398 | 0.7745763  |
| Gapvd1  | 5140.80041 | -0.1158217 | 0.2207432  | -0.5246899 | 0.59979879 | 0.82035805 |
| Stap2   | 377.475004 | -0.1158294 | 0.33322767 | -0.3475982 | 0.72814193 | 0.8899894  |
| Ccdc124 | 3609.93191 | -0.1158401 | 0.21318224 | -0.5433855 | 0.58686438 | 0.81289106 |
| Tmub2   | 1390.26246 | -0.1158818 | 0.24929166 | -0.4648441 | 0.64204311 | 0.84385084 |
| Pms2    | 2490.05491 | -0.115897  | 0.15315632 | -0.7567234 | 0.44921558 | 0.7220415  |
| Eif2b3  | 5316.41084 | -0.1159591 | 0.20859419 | -0.5559077 | 0.57827395 | 0.80771125 |
| Armc12  | 5.84952868 | -0.1159917 | 0.41676659 | -0.2783134 | 0.78077179 | NA         |
| Camk2g  | 1510.24832 | -0.1160013 | 0.19178672 | -0.6048452 | 0.54528184 | 0.78661205 |
| Ssfa2   | 2763.27944 | -0.1160035 | 0.2086165  | -0.5560611 | 0.5781691  | 0.80771125 |
| Ginm1   | 1557.61691 | -0.1160661 | 0.18768652 | -0.6184041 | 0.53630897 | 0.78076585 |
| Kndc1   | 124.397807 | -0.1160941 | 0.41867029 | -0.2772925 | 0.7815555  | 0.91337854 |
| Sipa1l1 | 5597.11982 | -0.1161232 | 0.20921193 | -0.5550505 | 0.57886012 | 0.80806586 |
| Vezf1   | 2439.55472 | -0.1161532 | 0.22401537 | -0.5185053 | 0.60410576 | 0.82299156 |
| Ppp1ca  | 21598.3687 | -0.1161542 | 0.17256574 | -0.6731011 | 0.500883   | 0.75813841 |
| Zfand2a | 1210.06359 | -0.1162357 | 0.2355224  | -0.4935231 | 0.62164305 | 0.83196874 |
| Acss2   | 1889.56845 | -0.1164039 | 0.22321074 | -0.5214977 | 0.60202012 | 0.82195039 |
| Tdrkh   | 120.672352 | -0.116454  | 0.37316333 | -0.3120724 | 0.75498548 | 0.90191816 |
| Hexim2  | 455.222293 | -0.1165052 | 0.28187556 | -0.4133212 | 0.67937126 | 0.86613179 |
| Lonp2   | 4185.83309 | -0.1165161 | 0.20556905 | -0.5667978 | 0.57085155 | 0.80505969 |
| Pmf1    | 4040.45993 | -0.1165204 | 0.21059473 | -0.553292  | 0.58006346 | 0.80843941 |
| Ccdc174 | 1411.72946 | -0.1165291 | 0.17281402 | -0.6743033 | 0.5001185  | 0.7577302  |
| Gstz1   | 1760.69984 | -0.1165365 | 0.23345627 | -0.4991793 | 0.61765307 | 0.83032065 |
| Mov10   | 10570.5713 | -0.1165613 | 0.17332928 | -0.6724845 | 0.5012753  | 0.75822704 |
| Ppp2r5d | 8654.70411 | -0.1166294 | 0.19474353 | -0.5988871 | 0.54924816 | 0.78969658 |
| Morf4l2 | 28550.4081 | -0.1167429 | 0.16613669 | -0.7026917 | 0.48224792 | 0.74506649 |
| Foxo6   | 325.166916 | -0.1168426 | 0.26516157 | -0.4406469 | 0.65946866 | 0.854457   |
| Hif1an  | 4085.53087 | -0.1169595 | 0.18983811 | -0.6161013 | 0.53782764 | 0.78149754 |
| Gm5126  | 6.58525803 | -0.1169671 | 0.39637108 | -0.2950949 | 0.7679214  | 0.90649963 |
| Tnfaip3 | 68.3011387 | -0.1170801 | 0.4027707  | -0.2906866 | 0.771291   | 0.90875167 |
| Mir7030 | 4.67538378 | -0.117139  | 0.39651711 | -0.2954197 | 0.7676733  | NA         |
| Gm6277  | 4.93327777 | -0.1172484 | 0.35834902 | -0.3271906 | 0.74352373 | NA         |
| Lrrc75b | 31.2918586 | -0.1172611 | 0.42189811 | -0.277937  | 0.78106069 | 0.91325374 |
| Hnrnpd  | 24442.7881 | -0.1173533 | 0.18935517 | -0.6197525 | 0.53542074 | 0.7803571  |
| Atp1a1  | 31813.3312 | -0.1173546 | 0.14615418 | -0.8029505 | 0.42200337 | 0.70127884 |

|             |            |            |            |            |            |            |
|-------------|------------|------------|------------|------------|------------|------------|
| Chchd2      | 13346.8872 | -0.1175188 | 0.20240705 | -0.5806063 | 0.5615058  | 0.79905798 |
| C87436      | 688.070419 | -0.1175269 | 0.17922288 | -0.6557582 | 0.51197971 | 0.76528308 |
| Ppp1r1b     | 119.059321 | -0.1175583 | 0.34278553 | -0.3429499 | 0.73163616 | 0.89154993 |
| Whsc1l1     | 2405.40789 | -0.1175917 | 0.23076395 | -0.5095757 | 0.61034877 | 0.82628285 |
| Ric3        | 1115.3661  | -0.1176912 | 0.21295377 | -0.5526606 | 0.58049583 | 0.80865954 |
| Gm10825     | 2.39195249 | -0.1177559 | 0.32308397 | -0.3644748 | 0.71550353 | NA         |
| Ppifos      | 0.30937454 | -0.1178898 | 0.16749769 | -0.7038291 | 0.48153918 | NA         |
| 4930482G09I | 0.30937454 | -0.1178898 | 0.16749769 | -0.7038291 | 0.48153918 | NA         |
| Gm21276     | 0.30937454 | -0.1178898 | 0.16749769 | -0.7038291 | 0.48153918 | NA         |
| Cyp4a29     | 0.30937454 | -0.1178898 | 0.16749769 | -0.7038291 | 0.48153918 | NA         |
| Camp        | 0.30937454 | -0.1178898 | 0.16749769 | -0.7038291 | 0.48153918 | NA         |
| Gm20356     | 0.30937454 | -0.1178898 | 0.16749769 | -0.7038291 | 0.48153918 | NA         |
| Olfr1504    | 0.30937454 | -0.1178898 | 0.16749769 | -0.7038291 | 0.48153918 | NA         |
| Tnni3k      | 0.30937454 | -0.1178898 | 0.16749769 | -0.7038291 | 0.48153918 | NA         |
| 1700021N21I | 0.30937454 | -0.1178898 | 0.16749769 | -0.7038291 | 0.48153918 | NA         |
| Rp1         | 0.30937454 | -0.1178898 | 0.16749769 | -0.7038291 | 0.48153918 | NA         |
| D830046C22I | 0.30937454 | -0.1178898 | 0.16749769 | -0.7038291 | 0.48153918 | NA         |
| 4930404I05R | 0.30937454 | -0.1178898 | 0.16749769 | -0.7038291 | 0.48153918 | NA         |
| 4921530L21F | 0.30937454 | -0.1178898 | 0.16749769 | -0.7038291 | 0.48153918 | NA         |
| Olfr166     | 0.30937454 | -0.1178898 | 0.16749769 | -0.7038291 | 0.48153918 | NA         |
| Angpt4      | 0.30937454 | -0.1178898 | 0.16749769 | -0.7038291 | 0.48153918 | NA         |
| Slc22a28    | 0.30937454 | -0.1178898 | 0.16749769 | -0.7038291 | 0.48153918 | NA         |
| Redrum      | 0.30937454 | -0.1178898 | 0.16749769 | -0.7038291 | 0.48153918 | NA         |
| Slc34a1     | 0.30937454 | -0.1178898 | 0.16749769 | -0.7038291 | 0.48153918 | NA         |
| 4930515B02F | 0.30937454 | -0.1178898 | 0.16749769 | -0.7038291 | 0.48153918 | NA         |
| Pglyrp4     | 0.30937454 | -0.1178898 | 0.16749769 | -0.7038291 | 0.48153918 | NA         |
| Tmem132cos  | 0.30937454 | -0.1178898 | 0.16749769 | -0.7038291 | 0.48153918 | NA         |
| Mir708      | 0.30937454 | -0.1178898 | 0.16749769 | -0.7038291 | 0.48153918 | NA         |
| Lect2       | 0.30937454 | -0.1178898 | 0.16749769 | -0.7038291 | 0.48153918 | NA         |
| Gm1979      | 0.30937454 | -0.1178898 | 0.16749769 | -0.7038291 | 0.48153918 | NA         |
| Uba52       | 39648.7513 | -0.1178981 | 0.23598489 | -0.4996003 | 0.61735658 | 0.83032065 |
| Pus10       | 4844.92306 | -0.1179146 | 0.21673162 | -0.5440583 | 0.58640134 | 0.81268401 |
| Surf6       | 3854.20971 | -0.1179784 | 0.21109545 | -0.5588864 | 0.57623924 | 0.80734073 |
| Nhlrc4      | 9.83336176 | -0.1179826 | 0.43197947 | -0.2731209 | 0.78476027 | 0.91523977 |
| Gpr161      | 207.311882 | -0.1180919 | 0.38456367 | -0.3070802 | 0.75878235 | 0.90331943 |
| Ddx42       | 10863.2012 | -0.1182405 | 0.20861431 | -0.5667902 | 0.57085674 | 0.80505969 |
| Mars2       | 1349.99775 | -0.118438  | 0.21010686 | -0.5637037 | 0.57295581 | 0.80618651 |
| Amt         | 8073.91942 | -0.1184549 | 0.18738749 | -0.6321388 | 0.5272962  | 0.77475275 |
| Arid5b      | 6623.48258 | -0.1184623 | 0.34132142 | -0.3470697 | 0.72853895 | 0.8900505  |
| Mir7053     | 1.11902763 | -0.118523  | 0.24355239 | -0.4866428 | 0.62651147 | NA         |
| Tef         | 2975.27634 | -0.1185503 | 0.18174462 | -0.6522908 | 0.51421359 | 0.76610648 |

|             |            |            |            |            |            |            |
|-------------|------------|------------|------------|------------|------------|------------|
| Cnot4       | 3035.09193 | -0.1185509 | 0.19909416 | -0.5954515 | 0.55154174 | 0.79123853 |
| Bcl11a      | 9.27338117 | -0.1185972 | 0.43024346 | -0.2756514 | 0.78281582 | 0.91399508 |
| Mex3c       | 4310.20596 | -0.1186085 | 0.20519883 | -0.5780176 | 0.56325223 | 0.79992105 |
| Snhg1       | 11317.5017 | -0.118757  | 0.21853883 | -0.5434137 | 0.58684502 | 0.81289106 |
| Kcnp2       | 224.630863 | -0.1187927 | 0.34095617 | -0.3484104 | 0.727532   | 0.88986097 |
| Gm13315     | 1.98934467 | -0.1188803 | 0.33759964 | -0.352134  | 0.72473774 | NA         |
| 0610030E20F | 1695.35923 | -0.1189006 | 0.22921885 | -0.5187208 | 0.60395545 | 0.82288924 |
| Tax1bp1     | 11876.8261 | -0.1189093 | 0.15575681 | -0.763429  | 0.44520761 | 0.71864475 |
| Slfn8       | 557.706375 | -0.1189607 | 0.38024826 | -0.3128502 | 0.7543945  | 0.90191816 |
| Shc3        | 8.36881043 | -0.1189697 | 0.42112039 | -0.2825075 | 0.77755439 | 0.91189655 |
| Csnk1d      | 7295.2032  | -0.1189866 | 0.22523978 | -0.5282664 | 0.59731441 | 0.81955501 |
| Mir1949     | 62.0715712 | -0.1189915 | 0.36125259 | -0.3293858 | 0.74186411 | 0.89665148 |
| Zbtb44      | 11430.5935 | -0.1190208 | 0.20846637 | -0.5709351 | 0.56804362 | 0.80306738 |
| Gbbp1       | 17922.5308 | -0.1190983 | 0.14946173 | -0.7968478 | 0.42553944 | 0.70377154 |
| Fam63b      | 906.940192 | -0.1192143 | 0.29201046 | -0.4082535 | 0.68308757 | 0.86824483 |
| Rev1        | 5929.31258 | -0.1192494 | 0.1916587  | -0.6221967 | 0.53381253 | 0.77957624 |
| Cblc        | 251.216955 | -0.1193024 | 0.28331595 | -0.421093  | 0.67368719 | 0.86321737 |
| Gm14461     | 0.3314558  | -0.1193182 | 0.16845444 | -0.7083115 | 0.47875185 | NA         |
| Nmrk2       | 0.3314558  | -0.1193182 | 0.16845444 | -0.7083115 | 0.47875185 | NA         |
| Gm10754     | 0.3314558  | -0.1193182 | 0.16845444 | -0.7083115 | 0.47875185 | NA         |
| Gm8096      | 0.3314558  | -0.1193182 | 0.16845444 | -0.7083115 | 0.47875185 | NA         |
| Gpx5        | 0.3314558  | -0.1193182 | 0.16845444 | -0.7083115 | 0.47875185 | NA         |
| Klhl38      | 0.3314558  | -0.1193182 | 0.16845444 | -0.7083115 | 0.47875185 | NA         |
| Gm6904      | 0.3314558  | -0.1193182 | 0.16845444 | -0.7083115 | 0.47875185 | NA         |
| Plac8l1     | 0.3314558  | -0.1193182 | 0.16845444 | -0.7083115 | 0.47875185 | NA         |
| Mir3473c    | 0.3314558  | -0.1193182 | 0.16845444 | -0.7083115 | 0.47875185 | NA         |
| Mir106a     | 0.3314558  | -0.1193182 | 0.16845444 | -0.7083115 | 0.47875185 | NA         |
| Gm5150      | 0.3314558  | -0.1193182 | 0.16845444 | -0.7083115 | 0.47875185 | NA         |
| Ccr10       | 0.3314558  | -0.1193182 | 0.16845444 | -0.7083115 | 0.47875185 | NA         |
| Gp9         | 0.3314558  | -0.1193182 | 0.16845444 | -0.7083115 | 0.47875185 | NA         |
| Tmprss11bnl | 0.3314558  | -0.1193182 | 0.16845444 | -0.7083115 | 0.47875185 | NA         |
| 2610100L16F | 0.3314558  | -0.1193182 | 0.16845444 | -0.7083115 | 0.47875185 | NA         |
| 4930402F06F | 0.3314558  | -0.1193182 | 0.16845444 | -0.7083115 | 0.47875185 | NA         |
| 1700047A11F | 0.3314558  | -0.1193182 | 0.16845444 | -0.7083115 | 0.47875185 | NA         |
| Recql4      | 2670.26091 | -0.1193243 | 0.2221945  | -0.5370262 | 0.59124949 | 0.81611679 |
| Alkbh7      | 901.403341 | -0.1193642 | 0.2324927  | -0.5134105 | 0.60766417 | 0.82522557 |
| Stxbp4      | 710.817914 | -0.1194721 | 0.21980493 | -0.5435371 | 0.58676007 | 0.81289106 |
| Tsen2       | 1870.5436  | -0.11949   | 0.18172462 | -0.6575336 | 0.51083785 | 0.76480595 |
| Mir6941     | 1.00574979 | -0.1195379 | 0.26228288 | -0.4557596 | 0.64856285 | NA         |
| Gimap5      | 1.00574979 | -0.1195379 | 0.26228288 | -0.4557596 | 0.64856285 | NA         |
| Tiprl       | 3821.71221 | -0.1195847 | 0.16689328 | -0.7165338 | 0.47366182 | 0.73992114 |

|             |            |            |            |            |            |            |
|-------------|------------|------------|------------|------------|------------|------------|
| Siglece     | 4.10226952 | -0.1195965 | 0.36450419 | -0.3281074 | 0.74283049 | NA         |
| Bbs5        | 845.907781 | -0.1196445 | 0.21758997 | -0.5498624 | 0.58241379 | 0.81000763 |
| Hif1a       | 11204.3134 | -0.1196615 | 0.18778776 | -0.6372166 | 0.52398379 | 0.77176852 |
| Usp5        | 11525.756  | -0.1196918 | 0.19090193 | -0.6269807 | 0.53067192 | 0.77760181 |
| 1810032O08I | 1837.73516 | -0.1197295 | 0.21780091 | -0.5497201 | 0.58251139 | 0.81000763 |
| Mir684-2    | 1.30250085 | -0.1200561 | 0.30176832 | -0.3978418 | 0.69074679 | NA         |
| Hars2       | 1602.12541 | -0.120077  | 0.1605894  | -0.7477269 | 0.4546249  | 0.72518943 |
| Dhtkd1      | 2131.18093 | -0.1200853 | 0.2450588  | -0.4900266 | 0.6241151  | 0.8330284  |
| Grin1os     | 1.14826463 | -0.1201026 | 0.24471379 | -0.490788  | 0.62357639 | NA         |
| Xpo5        | 10575.5452 | -0.1201088 | 0.22805409 | -0.5266682 | 0.59842403 | 0.81984777 |
| Eif5a       | 58108.0319 | -0.1201596 | 0.17106527 | -0.7024197 | 0.48241749 | 0.74506649 |
| 2610044O15I | 770.145626 | -0.1202106 | 0.18489694 | -0.6501494 | 0.5155957  | 0.76690853 |
| Slc30a9     | 4361.15069 | -0.1202143 | 0.21258848 | -0.5654787 | 0.57174821 | 0.80538015 |
| Csrnp3      | 271.207359 | -0.1202276 | 0.38480215 | -0.3124399 | 0.75470622 | 0.90191816 |
| Patz1       | 6941.06432 | -0.1202454 | 0.21266444 | -0.5654231 | 0.571786   | 0.80538015 |
| Pop1        | 8771.31953 | -0.1202959 | 0.16032155 | -0.7503417 | 0.45304893 | 0.72431158 |
| Sar1a       | 7747.74369 | -0.1203225 | 0.14300895 | -0.8413633 | 0.40014442 | 0.68523795 |
| Klk1b3      | 1.40152472 | -0.1203527 | 0.19318089 | -0.6230053 | 0.53328106 | NA         |
| Snx22       | 159.361654 | -0.1203856 | 0.30633318 | -0.3929891 | 0.69432755 | 0.87496374 |
| Fbrsl1      | 3035.98389 | -0.1204326 | 0.19880579 | -0.6057801 | 0.54466078 | 0.78637265 |
| A930006I01R | 0.35078398 | -0.1204473 | 0.16920358 | -0.7118485 | 0.47655858 | NA         |
| BC035044    | 0.35078398 | -0.1204473 | 0.16920358 | -0.7118485 | 0.47655858 | NA         |
| Ugt2b34     | 0.35078398 | -0.1204473 | 0.16920358 | -0.7118485 | 0.47655858 | NA         |
| Amd1        | 0.35078398 | -0.1204473 | 0.16920358 | -0.7118485 | 0.47655858 | NA         |
| Ptgdr       | 0.35078398 | -0.1204473 | 0.16920358 | -0.7118485 | 0.47655858 | NA         |
| Pabpc2      | 0.35078398 | -0.1204473 | 0.16920358 | -0.7118485 | 0.47655858 | NA         |
| Gm16548     | 0.35078398 | -0.1204473 | 0.16920358 | -0.7118485 | 0.47655858 | NA         |
| Klk1b4      | 0.35078398 | -0.1204473 | 0.16920358 | -0.7118485 | 0.47655858 | NA         |
| Prss30      | 0.35078398 | -0.1204473 | 0.16920358 | -0.7118485 | 0.47655858 | NA         |
| Col11a1     | 371.54018  | -0.1205678 | 0.41905124 | -0.287716  | 0.77356411 | 0.9098882  |
| Rtbdn       | 6.23603108 | -0.1206528 | 0.35283028 | -0.3419571 | 0.73238318 | 0.89180885 |
| Chmp5       | 7143.20946 | -0.1206544 | 0.18374962 | -0.6566241 | 0.51142267 | 0.76501865 |
| Ctxn3       | 0.35353705 | -0.1206741 | 0.16935372 | -0.7125566 | 0.47612015 | NA         |
| Smgc        | 0.35353705 | -0.1206741 | 0.16935372 | -0.7125566 | 0.47612015 | NA         |
| 4931402G19I | 0.35353705 | -0.1206741 | 0.16935372 | -0.7125566 | 0.47612015 | NA         |
| Tmem210     | 0.35353705 | -0.1206741 | 0.16935372 | -0.7125566 | 0.47612015 | NA         |
| Glipr1l1    | 0.35353705 | -0.1206741 | 0.16935372 | -0.7125566 | 0.47612015 | NA         |
| Mir6953     | 0.35353705 | -0.1206741 | 0.16935372 | -0.7125566 | 0.47612015 | NA         |
| Rag2        | 0.35353705 | -0.1206741 | 0.16935372 | -0.7125566 | 0.47612015 | NA         |
| 1700047G03I | 0.35353705 | -0.1206741 | 0.16935372 | -0.7125566 | 0.47612015 | NA         |
| Ptprc       | 0.35353705 | -0.1206741 | 0.16935372 | -0.7125566 | 0.47612015 | NA         |

|             |            |            |            |            |            |            |
|-------------|------------|------------|------------|------------|------------|------------|
| 1700041C23f | 0.35353705 | -0.1206741 | 0.16935372 | -0.7125566 | 0.47612015 | NA         |
| A430107P09f | 0.35353705 | -0.1206741 | 0.16935372 | -0.7125566 | 0.47612015 | NA         |
| Cml3        | 0.35353705 | -0.1206741 | 0.16935372 | -0.7125566 | 0.47612015 | NA         |
| Lgi1        | 0.35353705 | -0.1206741 | 0.16935372 | -0.7125566 | 0.47612015 | NA         |
| Scarna2     | 0.35353705 | -0.1206741 | 0.16935372 | -0.7125566 | 0.47612015 | NA         |
| Psg21       | 0.35353705 | -0.1206741 | 0.16935372 | -0.7125566 | 0.47612015 | NA         |
| Mir7074     | 0.35353705 | -0.1206741 | 0.16935372 | -0.7125566 | 0.47612015 | NA         |
| Ntsr2       | 0.35353705 | -0.1206741 | 0.16935372 | -0.7125566 | 0.47612015 | NA         |
| Skint2      | 0.35353705 | -0.1206741 | 0.16935372 | -0.7125566 | 0.47612015 | NA         |
| Mocs2       | 1478.31307 | -0.1206757 | 0.18092939 | -0.6669766 | 0.50478711 | 0.76065469 |
| Txndc2      | 8.63470967 | -0.1206908 | 0.43063186 | -0.2802645 | 0.77927456 | 0.91260627 |
| Pdgfa       | 3822.90584 | -0.120706  | 0.22809607 | -0.5291895 | 0.59667401 | 0.81955304 |
| Bop1        | 7739.56677 | -0.1208187 | 0.19129915 | -0.6315695 | 0.52766825 | 0.77506906 |
| Slc25a48    | 69.7704597 | -0.1208289 | 0.39871176 | -0.3030483 | 0.76185303 | 0.9048709  |
| Gm12409     | 1.36881827 | -0.1208684 | 0.22231931 | -0.5436702 | 0.58666844 | NA         |
| Mtap        | 7760.10647 | -0.1210424 | 0.18311105 | -0.6610329 | 0.50859121 | 0.76357423 |
| Lypd4       | 1.62370884 | -0.121134  | 0.32168896 | -0.3765563 | 0.70650335 | NA         |
| Myg1        | 2201.89015 | -0.1212356 | 0.23370324 | -0.5187589 | 0.60392891 | 0.82288924 |
| Dpp9        | 2261.41005 | -0.121262  | 0.23909257 | -0.5071758 | 0.61203148 | 0.82733845 |
| Dcaf13      | 7083.83752 | -0.1213363 | 0.17177101 | -0.7063838 | 0.4799495  | 0.74398871 |
| Gmppa       | 1959.27495 | -0.1213556 | 0.17933796 | -0.6766868 | 0.49860469 | 0.75683128 |
| Slc2a1      | 15890.5523 | -0.1213677 | 0.27428998 | -0.4424795 | 0.65814227 | 0.85360887 |
| Zbtb8b      | 551.123195 | -0.1213891 | 0.23987717 | -0.5060471 | 0.6128236  | 0.8279774  |
| Tube1       | 1497.00974 | -0.1214452 | 0.22637877 | -0.5364693 | 0.59163428 | 0.81634852 |
| Psmc2       | 14447.984  | -0.1214821 | 0.18421858 | -0.6594453 | 0.50960989 | 0.76413825 |
| Pik3r6      | 41.909584  | -0.1215662 | 0.37915508 | -0.3206239 | 0.74849541 | 0.900659   |
| Ndufc2      | 5534.9228  | -0.1215726 | 0.24625129 | -0.4936933 | 0.62152282 | 0.83196874 |
| lfrd1       | 6255.62809 | -0.1216416 | 0.18411819 | -0.6606714 | 0.50882308 | 0.76362746 |
| Olah        | 2.98962672 | -0.121717  | 0.37746427 | -0.3224596 | 0.74710451 | NA         |
| Eid2        | 1627.16814 | -0.1217315 | 0.20988131 | -0.5800017 | 0.56191345 | 0.79905798 |
| Mir331      | 0.37286524 | -0.1217431 | 0.17005888 | -0.7158877 | 0.47406068 | NA         |
| Gp49a       | 0.37286524 | -0.1217431 | 0.17005888 | -0.7158877 | 0.47406068 | NA         |
| Nox1        | 0.37286524 | -0.1217431 | 0.17005888 | -0.7158877 | 0.47406068 | NA         |
| Cyp2j8      | 0.37286524 | -0.1217431 | 0.17005888 | -0.7158877 | 0.47406068 | NA         |
| Tnfsf10     | 0.37286524 | -0.1217431 | 0.17005888 | -0.7158877 | 0.47406068 | NA         |
| Mir6910     | 0.37286524 | -0.1217431 | 0.17005888 | -0.7158877 | 0.47406068 | NA         |
| Mir6979     | 0.37286524 | -0.1217431 | 0.17005888 | -0.7158877 | 0.47406068 | NA         |
| Tmprss9     | 6.62469752 | -0.121761  | 0.41540389 | -0.2931147 | 0.76943449 | 0.90764437 |
| BC030336    | 1882.2737  | -0.1219597 | 0.21496175 | -0.5673553 | 0.57047279 | 0.80487644 |
| Galk2       | 2741.09257 | -0.1219909 | 0.16308673 | -0.7480125 | 0.45445262 | 0.72518943 |
| Ankrd66     | 1.44688578 | -0.1220145 | 0.228727   | -0.5334505 | 0.59372177 | NA         |



|             |            |            |            |            |            |            |
|-------------|------------|------------|------------|------------|------------|------------|
| Mir19b-2    | 1.6387367  | -0.1220291 | 0.26233641 | -0.4651625 | 0.64181506 | NA         |
| Srm         | 10792.1713 | -0.1220869 | 0.20975858 | -0.5820351 | 0.56054306 | 0.79840677 |
| 2010308F09F | 3.10389597 | -0.1222027 | 0.3538263  | -0.3453749 | 0.72981257 | NA         |
| Trim17      | 14.8270066 | -0.1222203 | 0.43134981 | -0.2833437 | 0.77691338 | 0.91141973 |
| Zfp407      | 2179.8658  | -0.1222458 | 0.2175712  | -0.5618658 | 0.57420748 | 0.80656675 |
| Psm1        | 25625.9706 | -0.1223601 | 0.15352271 | -0.7970163 | 0.42544158 | 0.70377154 |
| Clec4g      | 0.93995708 | -0.122396  | 0.20432183 | -0.5990352 | 0.54914941 | NA         |
| Timm23      | 2376.22893 | -0.1224087 | 0.21725842 | -0.5634246 | 0.57314577 | 0.80618651 |
| Klc1        | 2764.98538 | -0.1224224 | 0.16339852 | -0.7492256 | 0.45372123 | 0.72463991 |
| Brd4        | 13011.8843 | -0.1225191 | 0.24681318 | -0.4964042 | 0.61960924 | 0.83116939 |
| Ccdc158     | 75.3701517 | -0.1225288 | 0.35332666 | -0.3467863 | 0.72875187 | 0.89017519 |
| Sf3a1       | 12076.8816 | -0.1225684 | 0.23950536 | -0.5117565 | 0.60882147 | 0.82562526 |
| Manea       | 1731.50606 | -0.1226055 | 0.20878522 | -0.5872326 | 0.55704749 | 0.7958333  |
| Ppan        | 8910.14959 | -0.1226168 | 0.21275746 | -0.5763221 | 0.56439748 | 0.80088924 |
| Ociad1      | 9908.06386 | -0.1226451 | 0.16869801 | -0.7270096 | 0.46722005 | 0.73569653 |
| Snrpf       | 4113.27073 | -0.1227484 | 0.17568517 | -0.6986838 | 0.48474964 | 0.747183   |
| Mir125a     | 0.39219342 | -0.1227666 | 0.1707303  | -0.7190675 | 0.47209933 | NA         |
| Gpr139      | 0.39219342 | -0.1227666 | 0.1707303  | -0.7190675 | 0.47209933 | NA         |
| Mir376b     | 0.39219342 | -0.1227666 | 0.1707303  | -0.7190675 | 0.47209933 | NA         |
| Jakmip2     | 0.39219342 | -0.1227666 | 0.1707303  | -0.7190675 | 0.47209933 | NA         |
| Cytl1       | 0.39219342 | -0.1227666 | 0.1707303  | -0.7190675 | 0.47209933 | NA         |
| Gm20755     | 0.39219342 | -0.1227666 | 0.1707303  | -0.7190675 | 0.47209933 | NA         |
| Gm4907      | 0.39219342 | -0.1227666 | 0.1707303  | -0.7190675 | 0.47209933 | NA         |
| Hpk2        | 684.436941 | -0.1227911 | 0.27209202 | -0.4512852 | 0.65178401 | 0.84981368 |
| Cryz        | 4574.39451 | -0.1228705 | 0.2560757  | -0.4798211 | 0.63135462 | 0.83751629 |
| Cep170      | 3334.68191 | -0.1229262 | 0.24458814 | -0.5025845 | 0.61525645 | 0.82953469 |
| Hyou1       | 16172.7148 | -0.1229428 | 0.16909155 | -0.7270786 | 0.46717783 | 0.73569653 |
| B4galt6     | 11339.6802 | -0.122983  | 0.18762051 | -0.6554882 | 0.51215346 | 0.76528308 |
| Mir703      | 1504.91512 | -0.1230398 | 0.23263219 | -0.5289027 | 0.59687297 | 0.81955304 |
| Armc6       | 1413.59618 | -0.123079  | 0.25073793 | -0.4908669 | 0.62352057 | 0.83265488 |
| 6030407O03I | 12.0676785 | -0.1231369 | 0.43085955 | -0.2857935 | 0.77503626 | 0.91029675 |
| Eid3        | 28.0038799 | -0.1232951 | 0.4062599  | -0.3034883 | 0.76151776 | 0.90466935 |
| Tcf20       | 10287.4439 | -0.12334   | 0.20288343 | -0.6079351 | 0.5432305  | 0.78596222 |
| Ahi1        | 786.611045 | -0.1233674 | 0.27936768 | -0.4415951 | 0.6587822  | 0.85401151 |
| Klf9        | 9441.32967 | -0.1233867 | 0.19820363 | -0.6225251 | 0.53359665 | 0.77945629 |
| Pyy         | 2.63176066 | -0.123398  | 0.36217681 | -0.340712  | 0.73332044 | NA         |
| Cep162      | 2093.24549 | -0.1234804 | 0.18211184 | -0.6780473 | 0.49774173 | 0.75633981 |
| Ninl        | 5483.18708 | -0.1234909 | 0.22442903 | -0.5502446 | 0.58215162 | 0.81000763 |
| Usp3        | 1809.39438 | -0.1235621 | 0.20797088 | -0.5941317 | 0.55242402 | 0.79183545 |
| Snx21       | 278.936293 | -0.1236363 | 0.30953974 | -0.39942   | 0.6895838  | 0.87262736 |
| Lypd3       | 2.88908443 | -0.1236749 | 0.32537641 | -0.380098  | 0.7038727  | NA         |

|             |            |            |            |            |            |            |
|-------------|------------|------------|------------|------------|------------|------------|
| Fancf       | 533.526536 | -0.1236816 | 0.18597456 | -0.6650458 | 0.5060212  | 0.76151896 |
| Armc8       | 5500.45543 | -0.1237289 | 0.15200656 | -0.8139709 | 0.4156616  | 0.69777304 |
| Stk4        | 7610.44565 | -0.1237519 | 0.18155048 | -0.6816392 | 0.49546715 | 0.75533199 |
| Pde4d       | 808.747778 | -0.1237688 | 0.27266717 | -0.4539189 | 0.64988717 | 0.84900546 |
| Tmem97      | 4358.85105 | -0.1238024 | 0.18379947 | -0.673573  | 0.50058284 | 0.75785125 |
| Gm10512     | 0.98174391 | -0.1239109 | 0.20892347 | -0.5930921 | 0.55311954 | NA         |
| Ptgdr2      | 0.98174391 | -0.1239109 | 0.20892347 | -0.5930921 | 0.55311954 | NA         |
| 2310002F09F | 0.98174391 | -0.1239109 | 0.20892347 | -0.5930921 | 0.55311954 | NA         |
| Plet1os     | 10.1159838 | -0.123971  | 0.39881866 | -0.3108455 | 0.75591804 | 0.90213384 |
| Gpn2        | 1748.73556 | -0.123988  | 0.20809678 | -0.5958188 | 0.55129631 | 0.79108781 |
| A430005L14F | 3063.26498 | -0.1240354 | 0.19098813 | -0.6494402 | 0.5160539  | 0.76714981 |
| Tex15       | 1452.08743 | -0.1240584 | 0.24056157 | -0.5157031 | 0.60606178 | 0.82418428 |
| Scaf11      | 13239.9392 | -0.1241643 | 0.19796801 | -0.6271937 | 0.53053229 | 0.77760181 |
| Acap3       | 708.348704 | -0.124191  | 0.26152367 | -0.4748748 | 0.63487622 | 0.83934241 |
| Nvl         | 10847.6266 | -0.1242944 | 0.16154993 | -0.7693871 | 0.44166352 | 0.71556426 |
| Derl2       | 3075.24317 | -0.1243184 | 0.19363327 | -0.6420304 | 0.52085347 | 0.76986886 |
| Fbxo34      | 1906.63261 | -0.124332  | 0.17283377 | -0.719373  | 0.4719111  | 0.73859646 |
| Thumpd2     | 917.911083 | -0.1244135 | 0.18485407 | -0.6730363 | 0.50092419 | 0.75813841 |
| PsmA6       | 14707.417  | -0.1244546 | 0.17336967 | -0.717857  | 0.47284548 | 0.73930088 |
| Zfp473      | 2036.72601 | -0.1245238 | 0.2199972  | -0.5660244 | 0.57137719 | 0.80538015 |
| Clps        | 30.6039909 | -0.1245442 | 0.41368685 | -0.301059  | 0.7633695  | 0.90530857 |
| Cetn3       | 9015.81599 | -0.1246222 | 0.21829867 | -0.5708792 | 0.5680815  | 0.80306738 |
| Tmem234     | 2191.30994 | -0.1246249 | 0.18022304 | -0.6915035 | 0.4892492  | 0.75032686 |
| Sdccag8     | 279.808469 | -0.124637  | 0.22349022 | -0.5576846 | 0.57705979 | 0.80734073 |
| Aprt        | 7753.91076 | -0.1246377 | 0.22747472 | -0.5479188 | 0.58374764 | 0.81110253 |
| Ppat        | 15299.7486 | -0.1246948 | 0.17192694 | -0.7252779 | 0.46828156 | 0.73621136 |
| Ddi2        | 1781.36298 | -0.1247867 | 0.27448478 | -0.4546217 | 0.64938145 | 0.84883003 |
| lqsec3      | 4.74507835 | -0.1249267 | 0.37390631 | -0.3341123 | 0.73829481 | NA         |
| Leng9       | 59.2602788 | -0.1249543 | 0.33468162 | -0.3733528 | 0.70888592 | 0.8814172  |
| Pet2        | 68.0417792 | -0.1249786 | 0.36481893 | -0.3425769 | 0.73191675 | 0.89172966 |
| Sdr9c7      | 59.3044545 | -0.1250058 | 0.3730073  | -0.3351296 | 0.73752733 | 0.89415198 |
| Gm17762     | 92.7949411 | -0.1250479 | 0.29373703 | -0.4257137 | 0.67031645 | 0.86106816 |
| Sap30bp     | 4423.58068 | -0.1250492 | 0.17563175 | -0.7119964 | 0.47646703 | 0.74161007 |
| Tub         | 248.255225 | -0.1251114 | 0.25926116 | -0.4825692 | 0.62940166 | 0.83642328 |
| Npc2        | 23272.3505 | -0.1251205 | 0.1884152  | -0.6640681 | 0.50664671 | 0.76203338 |
| Tcof1       | 17185.5517 | -0.1252031 | 0.23199697 | -0.5396756 | 0.58942079 | 0.81476291 |
| Krt40       | 1.21175532 | -0.1252897 | 0.24365978 | -0.5141995 | 0.60711254 | NA         |
| Polg2       | 634.326335 | -0.1253079 | 0.21152223 | -0.5924103 | 0.55357588 | 0.79262117 |
| Fbxo6       | 4519.88221 | -0.1253197 | 0.25763422 | -0.486425  | 0.62666585 | 0.83469537 |
| Cfl1        | 55487.0552 | -0.1253751 | 0.18839523 | -0.66549   | 0.50573714 | 0.76134737 |
| B9d2        | 384.957494 | -0.1253773 | 0.25029706 | -0.5009139 | 0.61643174 | 0.83032065 |

|             |            |            |            |            |            |            |
|-------------|------------|------------|------------|------------|------------|------------|
| 1110004E09F | 2527.50275 | -0.1254159 | 0.18771963 | -0.6681024 | 0.50406825 | 0.76025581 |
| Gtf2ird1    | 5136.77502 | -0.1256123 | 0.1826034  | -0.6878967 | 0.49151783 | 0.75186608 |
| Adi1        | 5294.48395 | -0.1256748 | 0.23169888 | -0.5424059 | 0.58753891 | 0.81340776 |
| Epb4.1l2    | 10987.0577 | -0.1256906 | 0.1918349  | -0.6552021 | 0.51233761 | 0.76528308 |
| Il17rd      | 3117.92316 | -0.1256985 | 0.27148323 | -0.4630064 | 0.64335976 | 0.84490346 |
| Zfp692      | 2156.39725 | -0.1257393 | 0.20396862 | -0.6164638 | 0.53758848 | 0.78132829 |
| Ifitm3      | 10113.28   | -0.1257872 | 0.24409088 | -0.5153293 | 0.60632295 | 0.82427906 |
| Aagab       | 3385.74206 | -0.1259493 | 0.15836572 | -0.7953067 | 0.4264351  | 0.70402942 |
| Mief2       | 1440.33374 | -0.1260088 | 0.21404512 | -0.5887022 | 0.55606106 | 0.79522766 |
| Tgfbrap1    | 876.14224  | -0.1260273 | 0.1877222  | -0.6713501 | 0.50199754 | 0.75895097 |
| Mtcl1       | 4873.80594 | -0.1261208 | 0.24272287 | -0.5196084 | 0.60333654 | 0.82274997 |
| Timm17a     | 5857.7174  | -0.1263071 | 0.17911793 | -0.7051618 | 0.48070956 | 0.74425276 |
| 2810047C21F | 35.4466325 | -0.1264367 | 0.41385441 | -0.30551   | 0.75997776 | 0.90409661 |
| Fam122b     | 3669.13188 | -0.1264708 | 0.23764099 | -0.5321929 | 0.59459242 | 0.81784068 |
| Zfp746      | 1401.3125  | -0.1265836 | 0.17592571 | -0.7195285 | 0.47181534 | 0.73859646 |
| Usp22       | 9273.83893 | -0.1266073 | 0.18545738 | -0.682676  | 0.49481161 | 0.75483769 |
| Tsfm        | 2722.87058 | -0.1266131 | 0.17379753 | -0.7285094 | 0.46630181 | 0.73499487 |
| Omt2a       | 3.71787998 | -0.1266203 | 0.38826235 | -0.3261203 | 0.74433331 | NA         |
| Wasf2       | 7046.24218 | -0.1266386 | 0.25775659 | -0.4913107 | 0.62320674 | 0.83265488 |
| Ndufa9      | 9462.36365 | -0.1266485 | 0.19582397 | -0.6467465 | 0.51779605 | 0.76807775 |
| Usp24       | 9970.04025 | -0.1267791 | 0.2548294  | -0.4975056 | 0.61883256 | 0.83090659 |
| Tro         | 1292.72439 | -0.1268322 | 0.26288848 | -0.4824564 | 0.62948174 | 0.83645821 |
| Tmem41b     | 3109.95779 | -0.1268544 | 0.14935749 | -0.849334  | 0.39569548 | 0.68269664 |
| Mtmr4       | 4392.70594 | -0.1268885 | 0.24495473 | -0.5180078 | 0.60445285 | 0.82324805 |
| Bai2        | 489.680143 | -0.1269215 | 0.3929644  | -0.3229847 | 0.74670687 | 0.89966983 |
| 5730408K05F | 470.601604 | -0.1270265 | 0.24661676 | -0.5150765 | 0.60649958 | 0.82430301 |
| Prdm4       | 3745.84066 | -0.1270326 | 0.20004225 | -0.6350291 | 0.52540946 | 0.77314936 |
| Arsk        | 442.414571 | -0.1270965 | 0.29015585 | -0.4380283 | 0.6613658  | 0.85550654 |
| Myh6        | 64.5165383 | -0.1271477 | 0.32374356 | -0.3927422 | 0.69450993 | 0.87496374 |
| Cdk17       | 2605.86102 | -0.1271741 | 0.22972951 | -0.5535819 | 0.57986505 | 0.80831465 |
| Hax1        | 4336.77644 | -0.127177  | 0.19226972 | -0.6614508 | 0.50832325 | 0.76331932 |
| Rpn2        | 20211.6985 | -0.1272207 | 0.15776918 | -0.8063722 | 0.42002826 | 0.70035672 |
| Ddx46       | 15024.2795 | -0.1272947 | 0.18916376 | -0.6729336 | 0.50098953 | 0.7581635  |
| Thsd7a      | 21.6619344 | -0.1273057 | 0.4320959  | -0.2946236 | 0.76828141 | 0.90676565 |
| Dlc1        | 9117.4079  | -0.1273365 | 0.24330544 | -0.5233608 | 0.6007232  | 0.82133343 |
| Gm12992     | 252.314103 | -0.1273598 | 0.22360867 | -0.5695656 | 0.56897235 | 0.80393322 |
| Abhd17c     | 4303.52258 | -0.1273715 | 0.1583564  | -0.8043342 | 0.42120398 | 0.70099991 |
| Mcat        | 1489.91111 | -0.1274125 | 0.1934489  | -0.6586366 | 0.51012916 | 0.76433741 |
| Pura        | 900.166568 | -0.127522  | 0.24212385 | -0.5266808 | 0.59841527 | 0.81984777 |
| Tbx1        | 16.3281629 | -0.1275392 | 0.43225804 | -0.2950535 | 0.76795303 | 0.90649963 |
| Srp19       | 4946.19615 | -0.1276704 | 0.17375962 | -0.7347529 | 0.46249    | 0.73262524 |

|             |            |            |            |            |            |            |
|-------------|------------|------------|------------|------------|------------|------------|
| Lad1        | 732.563991 | -0.1276718 | 0.378729   | -0.337106  | 0.73603696 | 0.89366887 |
| Gjc2        | 1.77564304 | -0.1276968 | 0.29879349 | -0.4273749 | 0.66910629 | NA         |
| Usp47       | 5869.83254 | -0.1277199 | 0.19092923 | -0.6689386 | 0.50353464 | 0.75979694 |
| Scyl1       | 2693.86131 | -0.1278378 | 0.18342724 | -0.69694   | 0.48584035 | 0.74775368 |
| Ifnar1      | 2895.78345 | -0.1278572 | 0.19099168 | -0.6694387 | 0.50321565 | 0.75952071 |
| Ctdsp2      | 8028.5384  | -0.1278649 | 0.19888645 | -0.6429041 | 0.52028633 | 0.76986886 |
| Hira        | 5605.93163 | -0.1278884 | 0.20440435 | -0.6256638 | 0.5315355  | 0.7782358  |
| Atic        | 14438.8218 | -0.1279077 | 0.19848082 | -0.6444337 | 0.51929424 | 0.76934346 |
| Mir6947     | 0.46406182 | -0.1279131 | 0.17405146 | -0.7349156 | 0.46239087 | NA         |
| Bmp10       | 0.46406182 | -0.1279131 | 0.17405146 | -0.7349156 | 0.46239087 | NA         |
| AW046200    | 0.46406182 | -0.1279131 | 0.17405146 | -0.7349156 | 0.46239087 | NA         |
| Atoh7       | 0.46406182 | -0.1279131 | 0.17405146 | -0.7349156 | 0.46239087 | NA         |
| Igfbp1      | 0.46406182 | -0.1279131 | 0.17405146 | -0.7349156 | 0.46239087 | NA         |
| Fam46d      | 0.46406182 | -0.1279131 | 0.17405146 | -0.7349156 | 0.46239087 | NA         |
| 1700006F04F | 0.46406182 | -0.1279131 | 0.17405146 | -0.7349156 | 0.46239087 | NA         |
| Mir6975     | 0.46406182 | -0.1279131 | 0.17405146 | -0.7349156 | 0.46239087 | NA         |
| Mir7019     | 0.46406182 | -0.1279131 | 0.17405146 | -0.7349156 | 0.46239087 | NA         |
| Lrrtm3      | 0.46406182 | -0.1279131 | 0.17405146 | -0.7349156 | 0.46239087 | NA         |
| Esp36       | 0.46406182 | -0.1279131 | 0.17405146 | -0.7349156 | 0.46239087 | NA         |
| Gria1       | 0.46406182 | -0.1279131 | 0.17405146 | -0.7349156 | 0.46239087 | NA         |
| Nudt9       | 2484.29338 | -0.12792   | 0.18975837 | -0.6741205 | 0.50023473 | 0.75774583 |
| Atg12       | 4905.85764 | -0.1279496 | 0.15862891 | -0.8065972 | 0.41989857 | 0.70031666 |
| Tamm41      | 2420.0092  | -0.128019  | 0.23121592 | -0.5536772 | 0.57979979 | 0.80831465 |
| Stx8        | 1662.84363 | -0.1281473 | 0.25850518 | -0.4957245 | 0.62008882 | 0.83138912 |
| Dbt         | 5589.37426 | -0.1281637 | 0.14667281 | -0.8738069 | 0.38222342 | 0.67117846 |
| Dr1         | 5688.92535 | -0.1282492 | 0.20876846 | -0.614313  | 0.53900851 | 0.78286367 |
| Ep400       | 9046.18046 | -0.1282808 | 0.27245286 | -0.4708366 | 0.63775743 | 0.84137221 |
| Ropn1       | 3.83769953 | -0.1282886 | 0.37778479 | -0.3395812 | 0.73417194 | NA         |
| Usp8        | 7712.25276 | -0.128426  | 0.17429916 | -0.7368137 | 0.46123566 | 0.73153246 |
| Atf6b       | 2679.88638 | -0.1284841 | 0.1987562  | -0.646441  | 0.51799382 | 0.76808698 |
| Il11        | 8.38257501 | -0.1285109 | 0.37800881 | -0.3399681 | 0.73388056 | 0.892514   |
| Reps2       | 202.114401 | -0.1285116 | 0.40982597 | -0.313576  | 0.7538431  | 0.90191816 |
| Wdr45b      | 7328.51788 | -0.1285688 | 0.19692022 | -0.6528981 | 0.51382195 | 0.76592775 |
| Atpif1      | 12674.6886 | -0.1285943 | 0.21993762 | -0.5846854 | 0.55875927 | 0.79688788 |
| Tmtc3       | 4017.73817 | -0.1286234 | 0.27384146 | -0.4697002 | 0.63856921 | 0.84187189 |
| Cd33        | 0.99666942 | -0.128653  | 0.21001263 | -0.6125966 | 0.54014313 | NA         |
| Tctn3       | 652.059391 | -0.1286644 | 0.23065212 | -0.5578286 | 0.57696141 | 0.80734073 |
| B4galt1     | 3368.03094 | -0.1286828 | 0.16772412 | -0.7672291 | 0.44294531 | 0.71655493 |
| 4921504A21f | 3.39249986 | -0.1287022 | 0.37607714 | -0.342223  | 0.7321831  | NA         |
| Rab2a       | 6429.06135 | -0.1287046 | 0.1842714  | -0.6984512 | 0.48489507 | 0.74726025 |
| Gen1        | 1433.90119 | -0.1287108 | 0.2405239  | -0.5351267 | 0.59256225 | 0.81685504 |

|             |            |            |            |            |            |            |
|-------------|------------|------------|------------|------------|------------|------------|
| Tbx22       | 0.48614307 | -0.1287436 | 0.17458104 | -0.7374429 | 0.46085305 | NA         |
| Mir140      | 0.48614307 | -0.1287436 | 0.17458104 | -0.7374429 | 0.46085305 | NA         |
| Gm4981      | 0.48614307 | -0.1287436 | 0.17458104 | -0.7374429 | 0.46085305 | NA         |
| Mir7011     | 0.48614307 | -0.1287436 | 0.17458104 | -0.7374429 | 0.46085305 | NA         |
| Gja5        | 3.96955077 | -0.1287855 | 0.3484053  | -0.3696428 | 0.71164866 | NA         |
| Retsat      | 1562.01161 | -0.1288676 | 0.23509513 | -0.5481509 | 0.58358828 | 0.81095356 |
| Al854703    | 170.769431 | -0.1288799 | 0.28823816 | -0.4471298 | 0.65478136 | 0.85212302 |
| Odc1        | 22593.7689 | -0.1289095 | 0.26257067 | -0.4909518 | 0.62346053 | 0.83265488 |
| Cyp19a1     | 1.02040027 | -0.1289443 | 0.21113272 | -0.6107262 | 0.54138083 | NA         |
| Gins4       | 5853.97957 | -0.1289715 | 0.23169357 | -0.556647  | 0.57776865 | 0.8075571  |
| Fcrla       | 2.69012259 | -0.1289834 | 0.36641922 | -0.3520104 | 0.72483043 | NA         |
| Adamts8     | 174.245196 | -0.1289907 | 0.25831587 | -0.4993527 | 0.61753092 | 0.83032065 |
| Prps2       | 5550.83634 | -0.1289958 | 0.29400778 | -0.4387495 | 0.66084302 | 0.85535191 |
| Rnf31       | 2591.58949 | -0.1290611 | 0.19362635 | -0.6665475 | 0.50506123 | 0.7607897  |
| Gabrr1      | 88.9195171 | -0.1290658 | 0.35971652 | -0.3587986 | 0.71974578 | 0.88592422 |
| C330013E15F | 23.8313888 | -0.1290964 | 0.42134497 | -0.3063912 | 0.75930682 | 0.90371807 |
| Kcnk16      | 5.58227635 | -0.1292121 | 0.3868337  | -0.334025  | 0.73836069 | NA         |
| Dennd5a     | 5654.97905 | -0.1292367 | 0.20891625 | -0.6186055 | 0.53617627 | 0.78076585 |
| Akap10      | 2678.59417 | -0.1292525 | 0.24497859 | -0.5276072 | 0.59777198 | 0.81972425 |
| Pgs1        | 3094.92217 | -0.1293417 | 0.20419453 | -0.633424  | 0.52645682 | 0.77417778 |
| Hcrtr2      | 4.88181894 | -0.1293505 | 0.27846478 | -0.464513  | 0.64228024 | NA         |
| Uba1        | 49621.5054 | -0.1293791 | 0.20170683 | -0.6414216 | 0.52124881 | 0.77003139 |
| C3ar1       | 0.50547126 | -0.1294169 | 0.17500499 | -0.739504  | 0.45960101 | NA         |
| 4932435O22I | 0.50547126 | -0.1294169 | 0.17500499 | -0.739504  | 0.45960101 | NA         |
| Gp6         | 0.50547126 | -0.1294169 | 0.17500499 | -0.739504  | 0.45960101 | NA         |
| Lalba       | 0.50547126 | -0.1294169 | 0.17500499 | -0.739504  | 0.45960101 | NA         |
| Chrm1       | 0.50547126 | -0.1294169 | 0.17500499 | -0.739504  | 0.45960101 | NA         |
| Gxy1t1      | 3156.54471 | -0.1294288 | 0.23818111 | -0.5434048 | 0.58685113 | 0.81289106 |
| Rbm7        | 4895.17822 | -0.1294643 | 0.1575163  | -0.8219104 | 0.41112791 | 0.69365847 |
| Hook3       | 3334.04413 | -0.1295273 | 0.21114043 | -0.6134652 | 0.5395688  | 0.78345793 |
| Tcl1b1      | 0.50822433 | -0.129541  | 0.17508336 | -0.7398819 | 0.45937167 | NA         |
| Galnt10     | 656.555736 | -0.1296496 | 0.24611173 | -0.5267916 | 0.5983383  | 0.81984777 |
| Mms22l      | 4903.36637 | -0.1297221 | 0.17312325 | -0.7493049 | 0.45367343 | 0.72463799 |
| Filip1      | 50.3414036 | -0.1297265 | 0.29186657 | -0.4444719 | NA         | NA         |
| Cbwd1       | 2965.65943 | -0.1297364 | 0.20298924 | -0.6391294 | 0.52273875 | 0.77123968 |
| Zap70       | 382.460769 | -0.1299332 | 0.3364465  | -0.3861927 | 0.69935396 | 0.87735184 |
| Cops3       | 12092.1246 | -0.1299774 | 0.16944123 | -0.7670945 | 0.44302535 | 0.71660986 |
| Snora15     | 8.37397397 | -0.1300043 | 0.42930092 | -0.3028279 | 0.76202099 | 0.9048709  |
| Slc44a5     | 30.3628979 | -0.1300231 | 0.43144626 | -0.3013658 | 0.76313558 | 0.90522666 |
| 1110059E24F | 3163.85253 | -0.1300236 | 0.18201419 | -0.7143598 | 0.47500473 | 0.7406365  |
| Kctd20      | 4823.06553 | -0.1301299 | 0.17696262 | -0.7353523 | 0.46212495 | 0.73227074 |

|             |            |            |            |            |            |            |
|-------------|------------|------------|------------|------------|------------|------------|
| Ccdc13      | 99.6957292 | -0.1302022 | 0.39178158 | -0.3323337 | 0.73963733 | 0.89521445 |
| Rsl24d1     | 4981.71631 | -0.1302683 | 0.17772749 | -0.7329667 | 0.46357871 | 0.73330409 |
| Psmc5       | 6902.44717 | -0.1302929 | 0.1574817  | -0.8273524 | 0.40803733 | 0.69189712 |
| Gm10845     | 0.53030558 | -0.1302976 | 0.17555997 | -0.7421826 | 0.45797668 | NA         |
| 9530059O14I | 0.53030558 | -0.1302976 | 0.17555997 | -0.7421826 | 0.45797668 | NA         |
| D7Ertd443e  | 0.53030558 | -0.1302976 | 0.17555997 | -0.7421826 | 0.45797668 | NA         |
| Olfrc697    | 0.53030558 | -0.1302976 | 0.17555997 | -0.7421826 | 0.45797668 | NA         |
| Tex33       | 0.53030558 | -0.1302976 | 0.17555997 | -0.7421826 | 0.45797668 | NA         |
| Scn1a       | 0.53030558 | -0.1302976 | 0.17555997 | -0.7421826 | 0.45797668 | NA         |
| Epo         | 0.53030558 | -0.1302976 | 0.17555997 | -0.7421826 | 0.45797668 | NA         |
| Smg7        | 11881.434  | -0.1303473 | 0.20871562 | -0.624521  | 0.53228549 | 0.77862587 |
| Nudt3       | 4788.65828 | -0.130371  | 0.18233679 | -0.715001  | 0.47460844 | 0.74052205 |
| Il17c       | 4.53341659 | -0.1304139 | 0.38275369 | -0.3407253 | 0.73331041 | NA         |
| Dpp4        | 6412.56605 | -0.1305845 | 0.41603465 | -0.3138788 | 0.75361306 | 0.90191816 |
| BB287469    | 3.93173898 | -0.1306069 | 0.34466301 | -0.3789409 | 0.70473179 | NA         |
| Mir7682     | 0.54688069 | -0.1307948 | 0.17587222 | -0.7436924 | 0.45706261 | NA         |
| Adcy8       | 0.54688069 | -0.1307948 | 0.17587222 | -0.7436924 | 0.45706261 | NA         |
| Fli1        | 0.54688069 | -0.1307948 | 0.17587222 | -0.7436924 | 0.45706261 | NA         |
| Otof        | 1.21439633 | -0.1309446 | 0.25017619 | -0.5234095 | 0.60068928 | NA         |
| A130010J15R | 1027.55276 | -0.1309603 | 0.18343549 | -0.7139312 | 0.47526973 | 0.74079579 |
| Zfp609      | 4743.38451 | -0.1309751 | 0.24565492 | -0.5331669 | 0.59391805 | 0.81756392 |
| 4930547E08F | 1.00620084 | -0.1309796 | 0.2081738  | -0.6291841 | 0.52922856 | NA         |
| Gtf2h3      | 4393.93991 | -0.1310705 | 0.15875763 | -0.8256011 | 0.40903039 | 0.69259925 |
| Kcnk3       | 1.62717829 | -0.1311566 | 0.26719159 | -0.4908709 | 0.62351776 | NA         |
| Wdr8        | 1199.80183 | -0.1311743 | 0.18702889 | -0.7013586 | 0.48307926 | 0.74571824 |
| Serpinb8    | 18.5443182 | -0.1312052 | 0.41030928 | -0.3197714 | 0.74914166 | 0.90084943 |
| Plxna4      | 59.7939122 | -0.1313429 | 0.42693944 | -0.3076382 | 0.75835764 | 0.90307174 |
| lpp         | 956.415161 | -0.1313667 | 0.21643807 | -0.6069481 | 0.54388534 | 0.78623679 |
| Kansl1      | 7835.29092 | -0.1314001 | 0.23574578 | -0.5573806 | 0.57726739 | 0.80734073 |
| Chmp2a      | 6291.39789 | -0.131404  | 0.24444737 | -0.5375552 | 0.59088414 | 0.8159154  |
| Mto1        | 1619.37633 | -0.1314128 | 0.22347903 | -0.5880317 | 0.556511   | 0.7956143  |
| Sepw1       | 5511.14059 | -0.1314521 | 0.22664763 | -0.5799844 | 0.56192515 | 0.79905798 |
| Mir6407     | 0.56896195 | -0.1314936 | 0.17630963 | -0.7458106 | 0.45578186 | NA         |
| Chrn3       | 0.56896195 | -0.1314936 | 0.17630963 | -0.7458106 | 0.45578186 | NA         |
| Polm        | 893.883251 | -0.1315175 | 0.25513348 | -0.5154849 | 0.60621422 | 0.8242033  |
| Vmo1        | 6.72870927 | -0.1315514 | 0.41807347 | -0.314661  | 0.75301905 | 0.90191816 |
| Mrs2        | 1221.85159 | -0.1315639 | 0.25318781 | -0.5196298 | 0.60332162 | 0.82274997 |
| Cpne1       | 4390.83196 | -0.1315818 | 0.24709446 | -0.5325163 | 0.59436847 | 0.81778194 |
| Slc39a13    | 638.482123 | -0.131626  | 0.19125853 | -0.6882098 | 0.4913207  | 0.75186608 |
| Tcp10b      | 1.26296151 | -0.131713  | 0.24906301 | -0.5288339 | 0.59692064 | NA         |
| Agt         | 1.47960837 | -0.1317371 | 0.23056839 | -0.571358  | 0.56775701 | NA         |

|             |            |            |            |            |            |            |
|-------------|------------|------------|------------|------------|------------|------------|
| Cd86        | 2.90641431 | -0.131913  | 0.34446757 | -0.3829475 | 0.70175866 | NA         |
| Tbcd        | 6599.01549 | -0.1319597 | 0.1671079  | -0.7896678 | 0.4297218  | 0.70558586 |
| Prss33      | 10.9024812 | -0.1319686 | 0.42424602 | -0.3110662 | 0.75575033 | 0.90203956 |
| 9330175E14F | 1.57999738 | -0.1320297 | 0.26446012 | -0.4992424 | 0.61760866 | NA         |
| Spink5      | 0.58829013 | -0.1320579 | 0.17666165 | -0.7475187 | 0.45475053 | NA         |
| Glr3        | 2557.03701 | -0.1321254 | 0.20199828 | -0.6540918 | 0.51305266 | 0.76583624 |
| Ndufa13     | 7925.41656 | -0.1321966 | 0.23629348 | -0.5594592 | 0.57584835 | 0.80726744 |
| 2810008D09I | 1300.35471 | -0.1322179 | 0.2866659  | -0.4612263 | 0.64463624 | 0.84568401 |
| Dync1li1    | 7226.07551 | -0.132231  | 0.17232838 | -0.7673197 | 0.44289149 | 0.7165424  |
| Cabp2       | 2.77368126 | -0.1322724 | 0.26299944 | -0.5029379 | 0.61500792 | NA         |
| Pi15        | 1.65641529 | -0.1323765 | 0.26783752 | -0.494242  | 0.6211353  | NA         |
| Tktl1       | 54.6732624 | -0.1324755 | 0.33323561 | -0.3975432 | 0.69096697 | 0.87365931 |
| Fbxw10      | 172.018679 | -0.1325139 | 0.41899483 | -0.3162663 | 0.75180041 | 0.90161989 |
| Vps4b       | 7822.60259 | -0.1325287 | 0.15812472 | -0.8381279 | 0.40195885 | 0.68675204 |
| Mis12       | 3512.16307 | -0.1326397 | 0.18154066 | -0.7306333 | 0.46500314 | 0.73410475 |
| Hist1h3h    | 2.0586805  | -0.1326829 | 0.27700147 | -0.4789971 | 0.63194068 | NA         |
| Zcchc10     | 4750.07243 | -0.1326856 | 0.155622   | -0.8526145 | 0.39387313 | 0.68150459 |
| Bdh1        | 4617.8237  | -0.1327167 | 0.23736178 | -0.5591324 | 0.57607137 | 0.80734073 |
| Kctd9       | 2101.2669  | -0.1327214 | 0.1921329  | -0.6907792 | 0.48970431 | 0.75080269 |
| Raph1       | 3843.69217 | -0.13275   | 0.19781213 | -0.6710914 | 0.50216228 | 0.75905187 |
| Agap3       | 2426.33178 | -0.132812  | 0.19082051 | -0.6960049 | 0.48642579 | 0.7479826  |
| Camk2n1     | 1252.4485  | -0.1328555 | 0.32359606 | -0.4105597 | 0.68139541 | 0.86734714 |
| Rnf135      | 900.774821 | -0.132942  | 0.19991122 | -0.6650055 | 0.50604701 | 0.76151896 |
| 1700016G22I | 2.08769699 | -0.1329526 | 0.33180838 | -0.4006909 | 0.68864768 | NA         |
| Efhc1       | 278.955274 | -0.1329707 | 0.35137388 | -0.3784307 | 0.70511064 | 0.87969669 |
| Mir1188     | 2.00565445 | -0.133002  | 0.33792572 | -0.3935837 | 0.69388845 | NA         |
| Ms4a6d      | 16.0090981 | -0.1330397 | 0.32670689 | -0.4072141 | 0.68385073 | 0.86885207 |
| Foxe1       | 4.75586653 | -0.1330461 | 0.38313741 | -0.3472542 | 0.72840032 | NA         |
| Gm14420     | 840.853297 | -0.1330597 | 0.21345514 | -0.6233614 | 0.53304708 | 0.77898001 |
| Polr3h      | 1584.67328 | -0.1331101 | 0.20656171 | -0.6444085 | 0.51931055 | 0.76934346 |
| Ccng1       | 35081.8319 | -0.1331474 | 0.22405583 | -0.59426   | 0.55233825 | 0.79179683 |
| Arid4a      | 3277.35724 | -0.1331522 | 0.21412154 | -0.6218531 | 0.53403844 | 0.77964999 |
| Emx1        | 19.1854991 | -0.1331538 | 0.43223582 | -0.3080582 | 0.75803803 | 0.90307174 |
| Dsel        | 579.356187 | -0.1332721 | 0.25390407 | -0.5248914 | 0.59965871 | 0.82031074 |
| Gm13124     | 2.7888523  | -0.1332754 | 0.35923706 | -0.3709957 | 0.71064074 | NA         |
| Trappc10    | 1915.50495 | -0.1332934 | 0.20875767 | -0.638508  | 0.52314306 | 0.77134708 |
| Adcy6       | 182.493972 | -0.1334082 | 0.28454292 | -0.468851  | 0.63917613 | 0.84223427 |
| Rtnn        | 2452.64932 | -0.1335267 | 0.20040906 | -0.6662708 | 0.50523804 | 0.76089065 |
| Cd274       | 34.3172496 | -0.1336646 | 0.3972376  | -0.3364853 | 0.73650495 | 0.89381837 |
| Cwc25       | 2604.89242 | -0.1336724 | 0.21507992 | -0.621501  | 0.53427002 | 0.77984166 |
| Ube3c       | 8332.17585 | -0.1336748 | 0.18976442 | -0.7044247 | 0.4811683  | 0.7445399  |

|         |            |            |            |            |            |            |
|---------|------------|------------|------------|------------|------------|------------|
| Edn2    | 0.61874909 | -0.1336903 | 0.17767455 | -0.7524451 | 0.45178343 | NA         |
| Mir1960 | 0.61874909 | -0.1336903 | 0.17767455 | -0.7524451 | 0.45178343 | NA         |
| Gm1966  | 0.61874909 | -0.1336903 | 0.17767455 | -0.7524451 | 0.45178343 | NA         |
| Dhdds   | 1643.39816 | -0.1337008 | 0.18200717 | -0.734591  | 0.46258861 | 0.73263219 |
| Taf5    | 2744.78399 | -0.1337831 | 0.17044585 | -0.7849008 | 0.43251172 | 0.70786735 |
| Wnt8b   | 5.3171869  | -0.1338593 | 0.35604512 | -0.3759616 | 0.70694545 | NA         |
| Snw1    | 11056.7361 | -0.1338998 | 0.15397436 | -0.8696243 | 0.38450576 | 0.67381667 |
| Rnf20   | 4441.98806 | -0.1339026 | 0.16495325 | -0.811761  | 0.4169288  | 0.69852668 |
| Fbxl8   | 131.999252 | -0.1339245 | 0.32085865 | -0.4173942 | 0.67639008 | 0.864488   |
| Cox18   | 1591.30671 | -0.1339354 | 0.18751877 | -0.7142505 | 0.47507229 | 0.7406365  |
| Psmb6   | 17292.6975 | -0.1339572 | 0.23531722 | -0.5692624 | 0.56917809 | 0.80415085 |
| Mir301  | 2.12571064 | -0.1339821 | 0.31137587 | -0.4302904 | 0.66698437 | NA         |
| Tm2d2   | 1479.03856 | -0.1342733 | 0.20348828 | -0.6598578 | 0.50934509 | 0.7640422  |
| Sik2    | 1045.58903 | -0.1342861 | 0.25802024 | -0.520448  | 0.60275139 | 0.82244335 |
| Agps    | 11836.78   | -0.1343382 | 0.18073322 | -0.7432957 | 0.45730266 | 0.7278929  |
| Hsf1    | 2104.48434 | -0.1343606 | 0.16890532 | -0.795479  | 0.42633494 | 0.70402942 |
| Gm6251  | 30.280154  | -0.1345121 | 0.40781545 | -0.3298356 | 0.74152417 | 0.89648156 |
| Arf5    | 4668.34498 | -0.1345943 | 0.2009007  | -0.6699544 | 0.50288685 | 0.75933521 |
| Rnps1   | 6089.22023 | -0.1346041 | 0.25133148 | -0.5355639 | 0.59225995 | 0.81672736 |
| Ptger3  | 8.58207472 | -0.1346257 | 0.42114373 | -0.3196669 | 0.74922085 | 0.90084943 |
| Klhl13  | 12080.1414 | -0.1346301 | 0.23805787 | -0.5655352 | 0.57170981 | 0.80538015 |
| Apoc3   | 0.66015853 | -0.1346793 | 0.178284   | -0.7554199 | 0.44999705 | NA         |
| Ctla4   | 0.66015853 | -0.1346793 | 0.178284   | -0.7554199 | 0.44999705 | NA         |
| Rbpjl   | 0.6629116  | -0.1347575 | 0.17833208 | -0.755655  | 0.44985609 | NA         |
| Rcc1    | 9256.82444 | -0.1349049 | 0.17379519 | -0.776229  | 0.43761379 | 0.7115571  |
| Fam98b  | 3695.50006 | -0.1350332 | 0.1743134  | -0.7746574 | 0.43854216 | 0.71220104 |
| Akap8   | 14517.2573 | -0.1350816 | 0.19876763 | -0.6795953 | 0.49676072 | 0.7560535  |
| Eif3f   | 15395.4108 | -0.1351167 | 0.15990574 | -0.8449774 | 0.39812344 | 0.68403686 |
| Dnajc10 | 8341.27112 | -0.1351335 | 0.16754545 | -0.8065481 | 0.41992688 | 0.70031666 |
| Ssh3    | 213.922032 | -0.1351938 | 0.31685757 | -0.4266706 | 0.66961925 | 0.86052797 |
| Thop1   | 6543.24342 | -0.1352206 | 0.1965238  | -0.6880624 | 0.49141348 | 0.75186608 |
| Zfp524  | 179.524874 | -0.1353167 | 0.26969559 | -0.5017386 | 0.61585142 | 0.82990514 |
| Wdr62   | 5023.06426 | -0.1354068 | 0.18360205 | -0.7375016 | 0.4608174  | 0.73116428 |
| Hrct1   | 5.74008155 | -0.1355372 | 0.38623755 | -0.3509168 | 0.72565077 | NA         |
| Tomm40  | 9996.96277 | -0.1355764 | 0.20657492 | -0.6563064 | 0.51162699 | 0.76525068 |
| S1pr1   | 520.661478 | -0.1355956 | 0.34675318 | -0.3910435 | 0.69576505 | 0.8756043  |
| Trappc1 | 2560.29671 | -0.1356368 | 0.23980388 | -0.5656154 | 0.57165522 | 0.80538015 |
| Eapp    | 2748.46492 | -0.1356414 | 0.19935539 | -0.6804001 | 0.49625113 | 0.75578268 |
| Rasa1   | 4748.56531 | -0.1356495 | 0.21280312 | -0.6374412 | 0.5238375  | 0.77171248 |
| Poc1b   | 1164.6866  | -0.1356851 | 0.19724903 | -0.6878871 | 0.4915239  | 0.75186608 |
| Gm7361  | 0.70707411 | -0.1357384 | 0.17893328 | -0.7585978 | 0.4480932  | NA         |



|             |            |            |            |            |            |            |
|-------------|------------|------------|------------|------------|------------|------------|
| Fbxw21      | 0.70707411 | -0.1357384 | 0.17893328 | -0.7585978 | 0.4480932  | NA         |
| Olf703      | 0.70707411 | -0.1357384 | 0.17893328 | -0.7585978 | 0.4480932  | NA         |
| Ppp1r13l    | 640.202519 | -0.1357512 | 0.22391816 | -0.6062536 | 0.5443464  | 0.78623679 |
| Ccdc184     | 8.08397258 | -0.1357545 | 0.41753851 | -0.3251306 | 0.74508223 | 0.89857636 |
| Tesk1       | 594.983396 | -0.1357782 | 0.25122752 | -0.5404593 | 0.58888033 | 0.8143171  |
| Aacs        | 3578.7009  | -0.1357957 | 0.20247992 | -0.6706625 | 0.50243557 | 0.75924357 |
| Napg        | 3109.23936 | -0.1359009 | 0.15286508 | -0.8890248 | 0.37398974 | 0.66357547 |
| Rab9        | 4234.85501 | -0.1359707 | 0.15257408 | -0.8911783 | 0.37283354 | 0.66269681 |
| Mettl23     | 1012.10372 | -0.1360469 | 0.20918675 | -0.6503609 | 0.51545911 | 0.76685206 |
| Vsig10l     | 132.17427  | -0.1360797 | 0.35439348 | -0.3839791 | 0.70099396 | 0.87785127 |
| Gm5475      | 0.72640229 | -0.1361309 | 0.17917303 | -0.7597735 | 0.44739001 | NA         |
| Mir130b     | 3.24141566 | -0.1361449 | 0.33493135 | -0.406486  | 0.68438553 | NA         |
| Edc4        | 7608.54924 | -0.1361792 | 0.24327196 | -0.5597816 | 0.5756284  | 0.80714793 |
| Nek9        | 4375.01634 | -0.1362027 | 0.18075348 | -0.7535277 | 0.4511329  | 0.72303079 |
| Gps2        | 1367.72805 | -0.1363149 | 0.24426161 | -0.5580693 | 0.57679703 | 0.80734073 |
| Tmem64      | 6247.58587 | -0.1363781 | 0.3467573  | -0.3932956 | 0.69410119 | 0.87496374 |
| Telo2       | 1411.56284 | -0.1364288 | 0.17711012 | -0.7703049 | 0.44111906 | 0.71516289 |
| Hcrt        | 2.55454072 | -0.1364995 | 0.22000804 | -0.6204297 | 0.5349749  | NA         |
| Gm14405     | 0.74573047 | -0.1365104 | 0.17940437 | -0.7609091 | 0.44671139 | NA         |
| Rrn3        | 15226.9352 | -0.1365505 | 0.18600443 | -0.7341252 | 0.46287244 | 0.73275933 |
| Pot1b       | 1402.71038 | -0.1366617 | 0.23611364 | -0.5787964 | 0.56272655 | 0.79946653 |
| S100a3      | 1.89082937 | -0.1366997 | 0.30268448 | -0.4516245 | 0.65153952 | NA         |
| Bicd1       | 696.911871 | -0.1367198 | 0.21157062 | -0.6462135 | 0.51814112 | 0.76808698 |
| 1700007B14f | 0.52755251 | -0.1368419 | 0.17954572 | -0.7621565 | 0.44596663 | NA         |
| Mir543      | 0.52755251 | -0.1368419 | 0.17954572 | -0.7621565 | 0.44596663 | NA         |
| Mirlet7g    | 0.52755251 | -0.1368419 | 0.17954572 | -0.7621565 | 0.44596663 | NA         |
| 2300005B03f | 0.52755251 | -0.1368419 | 0.17954572 | -0.7621565 | 0.44596663 | NA         |
| Mir5133     | 25.1626833 | -0.1368655 | 0.42635773 | -0.321011  | 0.74820204 | 0.90057336 |
| Gnat2       | 39.5109486 | -0.1370261 | 0.37612283 | -0.3643121 | 0.71562493 | 0.88472721 |
| Crls1       | 2746.53919 | -0.1370402 | 0.1729103  | -0.7925506 | 0.4280397  | 0.70472095 |
| Lair1       | 6.68732784 | -0.1370471 | 0.40808724 | -0.3358279 | 0.73700067 | 0.89391803 |
| LOC1008616  | 2.54113362 | -0.1371668 | 0.32043706 | -0.4280615 | 0.66860636 | NA         |
| Eif3c       | 46173.128  | -0.1372224 | 0.15133785 | -0.9067292 | 0.36455003 | 0.65463251 |
| Gm5795      | 0.78438684 | -0.1372325 | 0.17984323 | -0.7630676 | 0.44542307 | NA         |
| Klrb1f      | 0.78438684 | -0.1372325 | 0.17984323 | -0.7630676 | 0.44542307 | NA         |
| Zfp191      | 3769.88868 | -0.1372639 | 0.1862469  | -0.7369998 | 0.46112247 | 0.73142754 |
| Ascc2       | 3832.46218 | -0.137287  | 0.21953648 | -0.6253493 | 0.53174182 | 0.7783431  |
| Ppp1r36     | 25.6437367 | -0.1372897 | 0.40789256 | -0.3365831 | 0.73643123 | 0.89379865 |
| Nop2        | 13636.9454 | -0.1373295 | 0.20497632 | -0.6699773 | 0.50287228 | 0.75933521 |
| Mir1929     | 1.4379336  | -0.1373361 | 0.23107649 | -0.5943316 | 0.55229038 | NA         |
| Ndufs2      | 14067.2545 | -0.1373972 | 0.1668241  | -0.823605  | 0.41016404 | 0.69309338 |

|             |            |            |            |            |            |            |
|-------------|------------|------------|------------|------------|------------|------------|
| Arhgap20    | 69.9518075 | -0.13741   | 0.40491346 | -0.3393566 | 0.73434114 | 0.89276431 |
| BC048602    | 0.77343636 | -0.1374552 | 0.17997841 | -0.7637319 | 0.44502704 | NA         |
| Nhp2l1      | 2719.57854 | -0.1374677 | 0.18773626 | -0.7322384 | 0.46402309 | 0.7336339  |
| Phf20l1     | 1602.88075 | -0.1374876 | 0.21965231 | -0.6259328 | 0.53135904 | 0.7782358  |
| Hpcal4      | 24.5558599 | -0.1375191 | 0.42300642 | -0.3250993 | 0.74510592 | 0.89857636 |
| Dner        | 261.171544 | -0.1375935 | 0.39135051 | -0.3515863 | 0.72514853 | 0.88898579 |
| Edc3        | 3932.1332  | -0.1376027 | 0.19090567 | -0.7207892 | 0.47103925 | 0.73829186 |
| Hspa9       | 74431.281  | -0.1376309 | 0.18967753 | -0.7256046 | 0.4680812  | 0.7360836  |
| Fam71f1     | 5.40242303 | -0.1376451 | 0.37856924 | -0.3635928 | 0.71616209 | NA         |
| Gm5129      | 2.91392519 | -0.1377525 | 0.33513727 | -0.411033  | 0.68104831 | NA         |
| Pfdn5       | 5215.39204 | -0.1377614 | 0.21089663 | -0.6532175 | 0.51361606 | 0.76592775 |
| Lsm5        | 3329.45663 | -0.1377659 | 0.20028994 | -0.6878325 | 0.49155825 | 0.75186608 |
| Tslp        | 0.79551762 | -0.1378327 | 0.1802108  | -0.7648417 | 0.44436579 | NA         |
| Vdac3       | 5924.282   | -0.137845  | 0.19223571 | -0.7170625 | 0.47333555 | 0.73971926 |
| Taf5l       | 7823.55373 | -0.1378719 | 0.19442335 | -0.7091323 | 0.47824241 | 0.74289758 |
| Zfp84       | 1654.82642 | -0.1380231 | 0.18395804 | -0.7502966 | 0.45307608 | 0.72431158 |
| Heatr6      | 2277.81336 | -0.1380677 | 0.2265813  | -0.6093519 | 0.54229124 | 0.78513836 |
| Ankrd32     | 2422.96314 | -0.1381364 | 0.22161623 | -0.6233134 | 0.5330786  | 0.77898001 |
| E130102H24I | 294.553889 | -0.1381831 | 0.22637875 | -0.6104069 | 0.5415923  | 0.78492088 |
| 4930518P08F | 0.81759887 | -0.1382087 | 0.18043421 | -0.7659785 | 0.44368909 | NA         |
| Srrm1       | 24183.9644 | -0.1382122 | 0.19791651 | -0.6983361 | 0.48496705 | 0.74729712 |
| Prkar1a     | 11624.4316 | -0.1383011 | 0.1736339  | -0.7965096 | 0.42573591 | 0.70394674 |
| Snx15       | 652.911756 | -0.1383026 | 0.20459878 | -0.67597   | 0.4990597  | 0.75701106 |
| Apeh        | 3433.83585 | -0.1383542 | 0.18971763 | -0.729264  | 0.46584017 | 0.73478857 |
| Plagl2      | 1449.22949 | -0.1383625 | 0.21288213 | -0.6499488 | 0.51572532 | 0.76698137 |
| Rnf223      | 6.30538832 | -0.1383712 | 0.40779729 | -0.3393137 | 0.73437342 | 0.89276431 |
| C2          | 323.663654 | -0.1384084 | 0.37556466 | -0.3685341 | 0.71247505 | 0.88374769 |
| Flot2       | 5098.04382 | -0.1385409 | 0.26214228 | -0.528495  | 0.59715582 | 0.81955501 |
| Mrpl55      | 1471.08813 | -0.1385599 | 0.23883126 | -0.580158  | 0.56180808 | 0.79905798 |
| Zfp654      | 2910.2143  | -0.138561  | 0.21907742 | -0.6324751 | 0.52707648 | 0.7745763  |
| Mpp5        | 3539.37678 | -0.1386584 | 0.22318092 | -0.6212824 | 0.53441381 | 0.77984269 |
| Hgd         | 2.66374102 | -0.138699  | 0.32643186 | -0.4248941 | 0.67091388 | NA         |
| Hes5        | 4.19177695 | -0.1387094 | 0.39058614 | -0.3551315 | 0.72249107 | NA         |
| Ahnak       | 10849.5003 | -0.1387259 | 0.27179886 | -0.510399  | 0.60977194 | 0.82596491 |
| Zcchc6      | 3528.3834  | -0.1387483 | 0.18381635 | -0.7548201 | 0.45035694 | 0.7229269  |
| Gpr98       | 625.945358 | -0.1388045 | 0.23976172 | -0.5789267 | 0.56263862 | 0.79946653 |
| Vmn2r2      | 0.86176138 | -0.1389084 | 0.18085591 | -0.7680611 | 0.44245089 | NA         |
| Poc1a       | 1500.50931 | -0.1389114 | 0.23668424 | -0.5869059 | 0.55726692 | 0.79587849 |
| Hist1h2bh   | 2.25884089 | -0.1389563 | 0.31530232 | -0.4407081 | 0.65942437 | NA         |
| Gmeb1       | 3052.02838 | -0.1390587 | 0.179383   | -0.7752056 | 0.4382182  | 0.71194435 |
| Upk2        | 42.9306922 | -0.1392269 | 0.42774969 | -0.3254868 | 0.74481268 | 0.89836205 |

|          |            |            |            |            |            |            |
|----------|------------|------------|------------|------------|------------|------------|
| Defb46   | 0.88384263 | -0.1392395 | 0.18105499 | -0.7690456 | 0.44186622 | NA         |
| Olf901   | 0.88384263 | -0.1392395 | 0.18105499 | -0.7690456 | 0.44186622 | NA         |
| Got2     | 7596.38912 | -0.1392729 | 0.20720062 | -0.6721644 | 0.50147906 | 0.75846147 |
| Sp2      | 3939.49089 | -0.1393124 | 0.20501462 | -0.6795242 | 0.49680577 | 0.7560535  |
| Rbm6     | 8565.58269 | -0.1393657 | 0.15033369 | -0.9270426 | 0.35390441 | 0.64535266 |
| Fdps     | 10659.002  | -0.1393928 | 0.22453239 | -0.6208139 | 0.53472205 | 0.77984269 |
| Ccrl2    | 1.04210414 | -0.1394339 | 0.21296254 | -0.6547346 | 0.51263863 | NA         |
| Herc2    | 6665.30101 | -0.1394422 | 0.25389525 | -0.5492115 | 0.5828603  | 0.81037645 |
| Phrf1    | 7371.85429 | -0.1396493 | 0.20308982 | -0.6876231 | 0.49169013 | 0.75199382 |
| Zfp653   | 481.837022 | -0.1396494 | 0.22364673 | -0.6244196 | 0.53235205 | 0.77863648 |
| Ankmy1   | 22.3978509 | -0.1396921 | 0.43215225 | -0.3232475 | 0.74650783 | 0.89956941 |
| Eccscr   | 148.672658 | -0.139771  | 0.41403917 | -0.3375791 | 0.73568043 | 0.89351502 |
| Enkd1    | 1247.40256 | -0.1399574 | 0.19724859 | -0.7095482 | 0.47798436 | 0.74273443 |
| Dhx16    | 18109.9019 | -0.140014  | 0.1541952  | -0.9080311 | 0.36386177 | 0.65400074 |
| Ly6a     | 1292.12127 | -0.1400849 | 0.19039028 | -0.7357776 | NA         | NA         |
| BC030500 | 0.92812363 | -0.1401055 | 0.181574   | -0.7716165 | 0.4403416  | NA         |
| Mrgprf   | 34.0354884 | -0.1401879 | 0.42235332 | -0.331921  | 0.73994892 | 0.89541247 |
| Erc2     | 716.357041 | -0.1402324 | 0.2264031  | -0.6193925 | 0.53565785 | 0.7803571  |
| Mzb1     | 24.2837357 | -0.1402659 | 0.42943368 | -0.3266301 | 0.7439477  | 0.89792443 |
| Tubb4b   | 21959.491  | -0.1402784 | 0.21986828 | -0.6380111 | 0.52346643 | 0.77157293 |
| Gna13    | 9365.03057 | -0.1403295 | 0.22562619 | -0.6219556 | 0.53397105 | 0.77962481 |
| Ago4     | 191.611631 | -0.1403398 | 0.30942824 | -0.4535456 | 0.65015591 | 0.84900546 |
| Ehd2     | 67.1781041 | -0.1403602 | 0.40041951 | -0.3505329 | 0.72593884 | 0.88936235 |
| Vps8     | 2578.5939  | -0.1403763 | 0.16554037 | -0.8479886 | 0.39644435 | 0.68311424 |
| Psm6     | 9526.88519 | -0.1404009 | 0.16063184 | -0.8740541 | 0.38208877 | 0.67101778 |
| Glt1d1   | 1287.80858 | -0.1404329 | 0.17452622 | -0.8046523 | 0.42102032 | 0.70091929 |
| Apbb2    | 2347.79097 | -0.1405658 | 0.22110892 | -0.6357312 | 0.52495163 | 0.77262188 |
| Klk1b21  | 0.83922908 | -0.1405951 | 0.22817385 | -0.6161752 | 0.53777888 | NA         |
| Hrasls5  | 0.83922908 | -0.1405951 | 0.22817385 | -0.6161752 | 0.53777888 | NA         |
| Pdcd7    | 2750.10657 | -0.140738  | 0.16798153 | -0.8378186 | 0.4021326  | 0.68675204 |
| Smad6    | 521.783776 | -0.140856  | 0.31645617 | -0.4451042 | 0.65624443 | 0.85271673 |
| Taf1     | 11270.8639 | -0.1409336 | 0.20767512 | -0.6786255 | 0.49737521 | 0.75628114 |
| Zfand6   | 7401.87512 | -0.1409962 | 0.18653923 | -0.7558528 | 0.44973746 | 0.72243232 |
| Gng4     | 1.73230897 | -0.1410012 | 0.26386896 | -0.5343605 | 0.59309213 | NA         |
| Vps13a   | 3634.75227 | -0.1410197 | 0.21431685 | -0.6579964 | 0.51054042 | 0.76464545 |
| Appbp2   | 5635.35449 | -0.1410513 | 0.23963256 | -0.5886148 | 0.55611968 | 0.7952367  |
| Cacnb3   | 941.991991 | -0.1410619 | 0.31153145 | -0.4528015 | 0.65069167 | 0.84904399 |
| Mei1     | 15.8055377 | -0.1410874 | 0.43212993 | -0.3264931 | 0.7440513  | 0.89793122 |
| Foxred1  | 3375.81529 | -0.1411507 | 0.16958349 | -0.8323375 | 0.40521848 | 0.68916712 |
| Sap130   | 5762.9538  | -0.1411847 | 0.20876591 | -0.6762822 | 0.49886149 | 0.75696826 |
| Txn14b   | 523.126157 | -0.1412118 | 0.26128707 | -0.540447  | 0.58888883 | 0.8143171  |

|             |            |            |            |            |            |            |
|-------------|------------|------------|------------|------------|------------|------------|
| Chchd4      | 6478.97109 | -0.1413276 | 0.16337516 | -0.8650495 | 0.38701161 | 0.67599882 |
| 4930555G01I | 0.85625524 | -0.141353  | 0.18229791 | -0.7753956 | 0.43810592 | NA         |
| Slc8b1      | 2534.37205 | -0.1414095 | 0.2111189  | -0.6698099 | 0.50297896 | 0.75940056 |
| Cd59a       | 694.011552 | -0.1414395 | 0.25597295 | -0.5525564 | 0.58056718 | 0.80865954 |
| Snora33     | 245.220724 | -0.1415066 | 0.27334388 | -0.5176873 | 0.60467647 | 0.82336928 |
| E330034G19I | 1.09881648 | -0.1415835 | 0.21550775 | -0.6569765 | 0.51119604 | NA         |
| Gcn1l1      | 11223.1674 | -0.1416391 | 0.23165656 | -0.6114185 | 0.54092257 | 0.7846986  |
| Mrps30      | 5282.34296 | -0.1416436 | 0.17027437 | -0.8318549 | 0.40549085 | 0.68938321 |
| Gm15987     | 1.06061116 | -0.1416823 | 0.18251325 | -0.7762848 | 0.43758087 | NA         |
| Otub1       | 5146.84029 | -0.1416949 | 0.19503702 | -0.7265027 | 0.46753066 | 0.735927   |
| Zbed3       | 617.664198 | -0.1417661 | 0.24750086 | -0.5727902 | 0.56678673 | 0.80244906 |
| Cwf19l1     | 2052.07011 | -0.1417911 | 0.17876976 | -0.7931495 | 0.42769075 | 0.70467677 |
| Mapk9       | 4675.29181 | -0.1417974 | 0.16662104 | -0.8510173 | 0.39475972 | 0.68226374 |
| Tmem237     | 925.753559 | -0.1418813 | 0.19912047 | -0.71254   | 0.47613043 | 0.74146849 |
| Gatad1      | 5387.79816 | -0.1419155 | 0.20939499 | -0.6777408 | 0.49793606 | 0.75642242 |
| Naalad2     | 359.079915 | -0.1419226 | 0.40666353 | -0.3489927 | NA         | NA         |
| Ccdc85b     | 703.283992 | -0.1419348 | 0.25249873 | -0.562121  | 0.57403356 | 0.80656634 |
| Lta         | 2.10262251 | -0.1419865 | 0.33524101 | -0.4235355 | 0.67190461 | NA         |
| Rcn1        | 17330.7353 | -0.1420404 | 0.21746957 | -0.6531509 | 0.51365902 | 0.76592775 |
| Pramel1     | 93.6548743 | -0.1421628 | 0.31247215 | -0.4549615 | 0.64913691 | 0.84869184 |
| Cipc        | 2599.56763 | -0.1421961 | 0.21928438 | -0.6484552 | 0.51669058 | 0.767621   |
| Gpc5        | 0.86846607 | -0.1422128 | 0.22987165 | -0.6186619 | 0.53613911 | NA         |
| Sema6c      | 1354.72466 | -0.1422577 | 0.27178809 | -0.523414  | 0.60068619 | 0.82133343 |
| Gnal        | 517.155614 | -0.1423694 | 0.29209994 | -0.4873997 | 0.62597507 | 0.83432634 |
| 4933406J10R | 3.08555853 | -0.1423725 | 0.32562557 | -0.4372276 | 0.6619463  | NA         |
| Hint1       | 19454.6715 | -0.1423803 | 0.22293351 | -0.638667  | 0.52303959 | 0.77134419 |
| Dnajc8      | 17487.2742 | -0.142403  | 0.17989668 | -0.791582  | 0.42860442 | 0.7047819  |
| Snora61     | 465.306925 | -0.1424739 | 0.24266376 | -0.5871247 | 0.55711999 | 0.79586293 |
| Adk         | 3107.40852 | -0.1426507 | 0.17925311 | -0.795806  | 0.42614479 | 0.70402942 |
| Pth1r       | 14.9777778 | -0.1426662 | 0.42960109 | -0.3320899 | 0.73982138 | 0.89532781 |
| N6amt1      | 1019.07116 | -0.1429462 | 0.20432587 | -0.6995992 | 0.48417765 | 0.74704303 |
| Odf3l1      | 2.39504455 | -0.1429678 | 0.29308301 | -0.4878064 | 0.62568698 | NA         |
| lpo8        | 6380.22185 | -0.1430323 | 0.21567207 | -0.6631933 | 0.50720675 | 0.76252632 |
| Txnrd2      | 401.606136 | -0.1431645 | 0.23454356 | -0.6103964 | 0.54159925 | 0.78492088 |
| 1700109G15I | 0.90317082 | -0.1431658 | 0.18336312 | -0.7807778 | 0.43493321 | NA         |
| Vstm2b      | 2.51176843 | -0.1431664 | 0.29400465 | -0.4869529 | 0.6262917  | NA         |
| Fam114a2    | 6093.83031 | -0.1432454 | 0.23632104 | -0.6061475 | 0.54441678 | 0.78623679 |
| Ints7       | 5384.38747 | -0.1432664 | 0.2215282  | -0.6467186 | 0.5178141  | 0.76807775 |
| Zcchc11     | 5120.70187 | -0.1432785 | 0.23110881 | -0.6199611 | 0.5352834  | 0.78029548 |
| Dnajb6      | 4739.31346 | -0.1433645 | 0.24503251 | -0.5850834 | 0.55849162 | 0.79677132 |
| Heatr2      | 3281.11961 | -0.1433789 | 0.21055843 | -0.6809459 | 0.49590571 | 0.75561726 |

|             |            |            |            |            |            |            |
|-------------|------------|------------|------------|------------|------------|------------|
| 2610005L07F | 145.891604 | -0.1434214 | 0.32211581 | -0.445248  | 0.65614055 | 0.85271673 |
| Olf147      | 1.23737969 | -0.1434838 | 0.18357739 | -0.7815984 | 0.43445062 | NA         |
| Spata16     | 1.23737969 | -0.1434838 | 0.18357739 | -0.7815984 | 0.43445062 | NA         |
| B3gnt1      | 631.365269 | -0.1436086 | 0.19991205 | -0.7183587 | 0.47253615 | 0.73916179 |
| Kng2        | 103.901624 | -0.1436435 | 0.34418324 | -0.417346  | 0.67642531 | 0.864488   |
| Fbxw11      | 6856.7072  | -0.1436475 | 0.24562287 | -0.5848293 | 0.55866249 | 0.79686909 |
| Pld6        | 518.100327 | -0.1436914 | 0.23887711 | -0.6015287 | 0.54748791 | 0.7884049  |
| Gal3st1     | 115.066934 | -0.1438437 | 0.39599402 | -0.3632472 | 0.7164202  | 0.88475417 |
| Mrpl23      | 419.453423 | -0.1438456 | 0.23841469 | -0.603342  | 0.54628122 | 0.78754234 |
| Hes6        | 690.454672 | -0.1439111 | 0.25652047 | -0.5610122 | 0.57478919 | 0.80673793 |
| Eri2        | 2292.37168 | -0.1440264 | 0.17742622 | -0.8117537 | 0.41693297 | 0.69852668 |
| Cnot2       | 9480.8486  | -0.1440375 | 0.14646545 | -0.9834231 | 0.32539923 | 0.61902113 |
| Ptcra       | 6.7532463  | -0.1441313 | 0.38525618 | -0.374118  | 0.70831649 | 0.88125982 |
| Cdc37       | 16256.5319 | -0.1442009 | 0.18449502 | -0.781598  | 0.43445088 | 0.70860901 |
| Blmh        | 9381.52651 | -0.1442984 | 0.16656396 | -0.8663241 | 0.38631247 | 0.6752479  |
| Eif2ak4     | 3188.50951 | -0.1443457 | 0.14652659 | -0.9851163 | 0.32456693 | 0.61877141 |
| Hist1h2bn   | 1.09464435 | -0.1443742 | 0.21388654 | -0.6750035 | 0.49967355 | NA         |
| Zfp652os    | 2.35206445 | -0.1444622 | 0.31531636 | -0.4581501 | 0.64684458 | NA         |
| Galnt12     | 651.345432 | -0.1444839 | 0.33373189 | -0.432934  | 0.66506275 | 0.85764912 |
| 4933429K18F | 1.66006318 | -0.1444998 | 0.26852504 | -0.5381243 | 0.59049127 | NA         |
| Smoc2       | 3.2382475  | -0.1445277 | 0.32181195 | -0.4491059 | 0.65335525 | NA         |
| Dync1li2    | 4832.06472 | -0.1445402 | 0.18108383 | -0.7981951 | 0.42475728 | 0.70307615 |
| Fuom        | 492.132161 | -0.1445533 | 0.29328503 | -0.4928765 | 0.62209984 | 0.83212408 |
| Wdr19       | 1219.83323 | -0.1445928 | 0.16618393 | -0.8700769 | 0.38425836 | 0.673459   |
| BC037034    | 1407.37633 | -0.1446355 | 0.20969281 | -0.6897497 | 0.49035163 | 0.75122526 |
| Ctag2       | 0.82667925 | -0.1447058 | 0.22767779 | -0.6355727 | 0.52505499 | NA         |
| Prdm14      | 5336.54196 | -0.1447389 | 0.20805191 | -0.6956864 | 0.48662522 | 0.74804065 |
| Aaas        | 9359.62808 | -0.144791  | 0.16129378 | -0.8976848 | 0.36935363 | 0.65967648 |
| Ly6i        | 1.41414821 | -0.1448675 | 0.18438826 | -0.7856654 | 0.43206354 | NA         |
| Gm15217     | 1.41414821 | -0.1448675 | 0.18438826 | -0.7856654 | 0.43206354 | NA         |
| Ss18l1      | 555.397929 | -0.1449053 | 0.26701267 | -0.5426906 | 0.58734284 | 0.81340776 |
| Sox5        | 2.51693557 | -0.1449087 | 0.34665634 | -0.4180184 | 0.67593369 | NA         |
| Klf15       | 1620.74649 | -0.144966  | 0.2551727  | -0.5681094 | 0.56996065 | 0.80452556 |
| D17Wsu104e  | 3305.71866 | -0.1449979 | 0.200403   | -0.7235317 | 0.46935326 | 0.73704055 |
| Itga8       | 26.987733  | -0.145023  | 0.42237045 | -0.3433551 | 0.73133136 | 0.89152719 |
| Mroh1       | 2639.31331 | -0.1450342 | 0.22282914 | -0.6508763 | 0.51512634 | 0.76651865 |
| Zscan20     | 783.395549 | -0.1451184 | 0.21427248 | -0.6772611 | 0.49824029 | 0.75670871 |
| Fbxo22      | 7797.62937 | -0.1451697 | 0.18755648 | -0.7740051 | 0.43892776 | 0.712576   |
| Rptor       | 4251.27851 | -0.1452724 | 0.25899601 | -0.5609059 | 0.5748617  | 0.80673793 |
| Xkr8        | 689.476711 | -0.1453298 | 0.25386991 | -0.5724576 | 0.56701199 | 0.80254878 |
| Tnfaip8     | 1154.13215 | -0.145551  | 0.2516748  | -0.5783297 | 0.56304156 | 0.79976792 |

|             |            |            |            |            |            |            |
|-------------|------------|------------|------------|------------|------------|------------|
| Rasgrp3     | 17.9805196 | -0.1456118 | 0.39998961 | -0.3640391 | 0.71582884 | 0.88472721 |
| Guf1        | 2524.42562 | -0.1456259 | 0.24044033 | -0.6056636 | 0.54473819 | 0.78639569 |
| Lypd2       | 4.98447393 | -0.1456729 | 0.35107855 | -0.4149295 | 0.67819349 | NA         |
| Duoxa1      | 13.4302058 | -0.1457094 | 0.40332416 | -0.3612712 | 0.71789674 | 0.88547913 |
| Emd         | 5326.70821 | -0.1457733 | 0.16507895 | -0.883052  | 0.37720817 | 0.66718742 |
| Prkcd       | 2868.14637 | -0.145784  | 0.18066721 | -0.80692   | 0.41971256 | 0.7002414  |
| Rpl36       | 23509.3172 | -0.1458207 | 0.25725794 | -0.5668267 | 0.57083192 | 0.80505969 |
| Mad2l1bp    | 702.494452 | -0.1458252 | 0.25185576 | -0.5790029 | 0.56258723 | 0.79946653 |
| Eml5        | 2189.48805 | -0.1460556 | 0.21274034 | -0.6865438 | 0.49237023 | 0.75266386 |
| Ccdc88b     | 159.96345  | -0.1460727 | 0.38989462 | -0.3746467 | 0.70792325 | 0.88112271 |
| Gm15284     | 6.48142583 | -0.1460837 | 0.36067785 | -0.4050254 | 0.68545882 | 0.86995594 |
| Dnmt1       | 26241.474  | -0.1461199 | 0.21098765 | -0.6925519 | 0.48859081 | 0.74961283 |
| Cdk18       | 2058.48045 | -0.1461477 | 0.21753472 | -0.6718363 | 0.50168794 | 0.75870361 |
| Scrn2       | 796.082966 | -0.1461823 | 0.25691299 | -0.5689953 | 0.56935934 | 0.80418512 |
| BC053749    | 520.416773 | -0.1462217 | 0.23549389 | -0.620915  | 0.53465558 | 0.77984269 |
| Echs1       | 7610.06824 | -0.1462218 | 0.18677203 | -0.7828893 | 0.43369213 | 0.70858066 |
| Tmem170     | 1243.03884 | -0.1462233 | 0.23039191 | -0.6346721 | 0.52564229 | 0.77341879 |
| Smug1       | 1810.92352 | -0.1463144 | 0.18897448 | -0.7742548 | 0.43878015 | 0.71241075 |
| Zdhhc23     | 151.091711 | -0.1464108 | 0.35053852 | -0.417674  | 0.67618545 | 0.864488   |
| Slc4a10     | 125.164777 | -0.146434  | 0.33815435 | -0.4330389 | 0.6649865  | 0.85762192 |
| Capn1       | 5168.84504 | -0.1464715 | 0.26706749 | -0.5484437 | 0.58338727 | 0.81074669 |
| Fam92b      | 0.89766468 | -0.1464949 | 0.18528661 | -0.7906397 | 0.4291543  | NA         |
| Tmem143     | 1223.79238 | -0.1465261 | 0.21035584 | -0.696563  | 0.48607635 | 0.7479571  |
| Timm50      | 4625.34975 | -0.1465289 | 0.18724597 | -0.7825477 | 0.43389279 | 0.70858066 |
| Mettl1      | 1402.77153 | -0.1465328 | 0.21130714 | -0.6934589 | 0.4880216  | 0.749183   |
| Stard3      | 1117.36472 | -0.1466499 | 0.26546578 | -0.5524247 | 0.58065741 | 0.80868739 |
| Pold4       | 288.585667 | -0.1467461 | 0.30664887 | -0.4785477 | 0.6322604  | 0.83807377 |
| Dek         | 27626.5592 | -0.1467622 | 0.20582458 | -0.713045  | 0.47581788 | 0.74133857 |
| C030037D09I | 15.390146  | -0.1467836 | 0.42865027 | -0.3424321 | 0.73202573 | 0.89179257 |
| Svop        | 79.527838  | -0.1468186 | 0.34190629 | -0.4294119 | 0.66762349 | 0.85924293 |
| Gemin2      | 3894.69066 | -0.1468481 | 0.17264721 | -0.8505675 | 0.39500965 | 0.68236944 |
| Bms1        | 11385.3327 | -0.1469402 | 0.21640419 | -0.6790083 | 0.49713263 | 0.75614418 |
| Best1       | 34.5007527 | -0.1470125 | 0.39547534 | -0.3717362 | 0.71008926 | 0.88195802 |
| Flad1       | 1702.49608 | -0.1471241 | 0.19162658 | -0.7677645 | 0.44262712 | 0.71626371 |
| Lekr1       | 155.415186 | -0.1474098 | 0.33167731 | -0.4444374 | 0.65672638 | 0.85275541 |
| Cd300a      | 51.7163393 | -0.1474302 | 0.38346423 | -0.3844693 | 0.70063063 | 0.87785127 |
| Rabggb      | 12379.7296 | -0.1474996 | 0.18120549 | -0.8139908 | 0.4156502  | 0.69777304 |
| Cpped1      | 2672.28636 | -0.1475025 | 0.17720881 | -0.8323654 | 0.40520275 | 0.68916712 |
| Ndel1       | 3015.35574 | -0.1475457 | 0.20966175 | -0.7037319 | 0.48159974 | 0.74482882 |
| Thsd7b      | 1.33758298 | -0.1475894 | 0.25382317 | -0.5814655 | 0.56092678 | NA         |
| Piezo1      | 6900.12391 | -0.147709  | 0.25340934 | -0.5828872 | 0.55996927 | 0.79814554 |

|             |            |            |            |            |            |            |
|-------------|------------|------------|------------|------------|------------|------------|
| Copb2       | 17526.7141 | -0.1477139 | 0.1381141  | -1.0695062 | 0.28484163 | 0.57774517 |
| Ttc23l      | 0.88063851 | -0.1477339 | 0.23080559 | -0.6400795 | 0.52212089 | NA         |
| Coq7        | 2312.82244 | -0.1478599 | 0.21979209 | -0.6727261 | 0.50112159 | 0.75821324 |
| Tmx2        | 4277.73447 | -0.1480228 | 0.15784166 | -0.9377929 | 0.34835087 | 0.6406706  |
| Nap1l3      | 201.349525 | -0.148386  | 0.31762163 | -0.4671786 | 0.64037207 | 0.84294424 |
| Nmt2        | 11114.7724 | -0.1484366 | 0.1619676  | -0.9164583 | 0.35942657 | 0.65018613 |
| Npm3-ps1    | 556.037539 | -0.1484537 | 0.24939781 | -0.5952484 | 0.55167744 | 0.79136019 |
| Fkbp15      | 2879.85905 | -0.1484702 | 0.24336573 | -0.6100702 | 0.54181532 | 0.78503401 |
| Mlh1        | 3747.2142  | -0.1484768 | 0.17291853 | -0.8586515 | 0.3905328  | 0.6789464  |
| Slc35c2     | 2098.95609 | -0.1484819 | 0.23088393 | -0.6431021 | 0.52015788 | 0.76986886 |
| Bclaf1      | 27697.2855 | -0.1485018 | 0.17262127 | -0.8602751 | 0.38963742 | 0.67799188 |
| Gdi1        | 6533.71699 | -0.1485459 | 0.17045337 | -0.871475  | 0.38349484 | 0.67248981 |
| Myh10       | 8914.43691 | -0.1485658 | 0.22819233 | -0.6510552 | 0.51501084 | 0.76651865 |
| Eif2s1      | 21435.2351 | -0.1485976 | 0.16138799 | -0.9207477 | 0.35718214 | 0.64828893 |
| Snord69     | 114.195999 | -0.1486276 | 0.34757888 | -0.4276082 | 0.66893637 | 0.86007685 |
| Olfm1       | 642.157802 | -0.1486844 | 0.31841661 | -0.4669492 | 0.64053624 | 0.84302806 |
| Kat6b       | 22976.795  | -0.1486861 | 0.21600645 | -0.6883409 | 0.49123811 | 0.75186608 |
| 2310002J15R | 49.6011769 | -0.1487487 | 0.4301644  | -0.3457951 | 0.72949673 | 0.89040454 |
| Mterfd3     | 783.297323 | -0.1487608 | 0.17403519 | -0.8547741 | 0.39267622 | 0.68061835 |
| Scyl2       | 2859.78751 | -0.1487628 | 0.20114716 | -0.7395719 | 0.45955982 | 0.73006586 |
| Pirb        | 1.12927544 | -0.148799  | 0.21859434 | -0.6807083 | 0.49605611 | NA         |
| Hmgb1-rs17  | 2.07752285 | -0.1488075 | 0.33528447 | -0.4438245 | 0.65716946 | NA         |
| Atmin       | 9422.88877 | -0.1488562 | 0.18254419 | -0.815453  | 0.41481307 | 0.69715315 |
| Snord123    | 2.56121657 | -0.1489473 | 0.34057789 | -0.4373368 | 0.66186709 | NA         |
| Fam109a     | 700.709495 | -0.148958  | 0.24362308 | -0.6114282 | 0.54091616 | 0.7846986  |
| Pmvk        | 3408.28897 | -0.14907   | 0.25772535 | -0.5784064 | 0.56298981 | 0.79976747 |
| Snord22     | 1088.34493 | -0.1491097 | 0.26642903 | -0.5596603 | 0.5757112  | 0.80714793 |
| Simc1       | 1279.39747 | -0.1491205 | 0.26231424 | -0.5684804 | 0.56970884 | 0.8044622  |
| Coro1a      | 121.556379 | -0.1491496 | 0.34551948 | -0.4316677 | 0.66598294 | 0.85847983 |
| Ddx58       | 1676.65247 | -0.1491719 | 0.37067531 | -0.4024329 | 0.68736548 | 0.87088718 |
| Pik3r5      | 12.2377614 | -0.149175  | 0.4297874  | -0.3470901 | 0.72852363 | 0.8900505  |
| Ncoa1       | 2273.55427 | -0.1492116 | 0.28660311 | -0.5206209 | 0.60263089 | 0.82236318 |
| Bag4        | 5068.80092 | -0.1493104 | 0.22397804 | -0.6666296 | 0.50500874 | 0.7607897  |
| Ggta1       | 3923.21868 | -0.1494252 | 0.21186351 | -0.7052899 | 0.48062984 | 0.74425276 |
| 4931408C20F | 13.8746612 | -0.1494446 | 0.2015615  | -0.7414344 | NA         | NA         |
| Olf1371     | 0.922499   | -0.1495108 | 0.18700817 | -0.7994879 | 0.42400758 | NA         |
| Snord68     | 66.1410773 | -0.1495557 | 0.39384119 | -0.3797359 | 0.70414143 | 0.87942876 |
| Ubxn7       | 7382.63875 | -0.1495649 | 0.17775676 | -0.8414023 | 0.40012259 | 0.68523795 |
| Elavl1      | 10209.6029 | -0.1496992 | 0.16310988 | -0.9177814 | 0.35873332 | 0.64978295 |
| Btc         | 15.1192703 | -0.1497306 | 0.19792972 | -0.7564834 | NA         | NA         |
| Zfhx4       | 5.00375479 | -0.1497981 | 0.35161353 | -0.4260306 | 0.67008553 | NA         |

|         |            |            |            |            |            |            |
|---------|------------|------------|------------|------------|------------|------------|
| Vta1    | 3406.34747 | -0.1498245 | 0.17754475 | -0.8438692 | 0.39874249 | 0.68457103 |
| Mrpl15  | 13065.9078 | -0.1498493 | 0.17691835 | -0.8469972 | 0.39699669 | 0.68315763 |
| Lsm14a  | 12059.9896 | -0.1499073 | 0.15225179 | -0.9846014 | 0.32481992 | 0.6188465  |
| Snrpa   | 7326.38627 | -0.1499316 | 0.20571936 | -0.7288162 | 0.46611412 | 0.73498824 |
| Gap43   | 26.0889796 | -0.1499649 | 0.4270683  | -0.3511497 | 0.72547602 | 0.88922398 |
| lqcf5   | 16.7897237 | -0.1499667 | 0.43063543 | -0.3482452 | 0.72765604 | 0.88986097 |
| Aga     | 1236.17945 | -0.1499717 | 0.26250617 | -0.5713074 | 0.56779127 | 0.80306738 |
| Sppl2b  | 852.420061 | -0.1500006 | 0.22798872 | -0.65793   | 0.51058314 | 0.76464545 |
| Dpep3   | 185.493326 | -0.150043  | 0.38353034 | -0.3912155 | 0.69563798 | 0.87551523 |
| Ube2d1  | 1567.69672 | -0.1500783 | 0.17323175 | -0.8663442 | 0.38630145 | 0.6752479  |
| Tmem233 | 7.54632311 | -0.1500826 | 0.42611496 | -0.3522116 | 0.72467959 | 0.88879488 |
| Trim59  | 8274.63554 | -0.1500975 | 0.25176553 | -0.5961798 | 0.55105511 | 0.79097822 |
| Rnf186  | 1.31952701 | -0.1501507 | 0.25346133 | -0.592401  | 0.5535821  | NA         |
| Arid1a  | 11920.9231 | -0.1501702 | 0.25752322 | -0.5831325 | 0.5598041  | 0.79801207 |
| Apol7d  | 77.0072541 | -0.1504217 | 0.33155288 | -0.4536883 | 0.65005316 | 0.84900546 |
| Mak16   | 14234.5332 | -0.1505408 | 0.21706073 | -0.6935421 | 0.48796942 | 0.74917686 |
| Abl2    | 4776.46704 | -0.1505545 | 0.24969113 | -0.6029629 | 0.54653334 | 0.78775654 |
| Vmn2r29 | 4.43041817 | -0.1505822 | 0.39300312 | -0.3831578 | 0.70160279 | NA         |
| Klc4    | 1079.23547 | -0.1505868 | 0.19947753 | -0.7549063 | 0.45030519 | 0.7229269  |
| Rcc2    | 44769.735  | -0.1506805 | 0.19863737 | -0.7585705 | 0.44810951 | 0.7210835  |
| Wdr37   | 2742.25316 | -0.1506922 | 0.17657242 | -0.8534302 | 0.39342078 | 0.68107388 |
| Elp3    | 9345.66004 | -0.1508584 | 0.18307098 | -0.824043  | 0.40991514 | 0.69296557 |
| Cabin1  | 5101.05859 | -0.1508585 | 0.26478262 | -0.5697448 | 0.56885079 | 0.8038345  |
| Tex40   | 329.643735 | -0.1508757 | 0.35748632 | -0.422046  | 0.67299144 | 0.86279388 |
| Nap1l1  | 59205.712  | -0.15094   | 0.17143241 | -0.8804638 | 0.37860808 | 0.66771292 |
| Smc6    | 11288.2952 | -0.1510011 | 0.18425709 | -0.8195132 | 0.41249367 | 0.69505787 |
| F2rl1   | 2209.81075 | -0.151056  | 0.25819968 | -0.5850355 | 0.55852384 | 0.79677132 |
| Cnn3    | 39447.4373 | -0.1512119 | 0.21812674 | -0.6932294 | 0.4881656  | 0.74925614 |
| Herc1   | 4432.2176  | -0.151253  | 0.22665362 | -0.6673313 | 0.50456056 | 0.76045952 |
| Ttc7    | 825.484706 | -0.1512999 | 0.30653182 | -0.4935864 | 0.62159833 | 0.83196874 |
| Uqcc2   | 2888.63702 | -0.1513151 | 0.30861924 | -0.4902971 | 0.62392365 | 0.83284435 |
| Ap1g2   | 1154.3695  | -0.1513189 | 0.20450212 | -0.7399381 | 0.45933754 | 0.72986186 |
| Slc29a1 | 8795.08517 | -0.1513562 | 0.18255125 | -0.8291164 | 0.40703852 | 0.69103232 |
| Ppp2r2d | 7310.54986 | -0.1513995 | 0.18995545 | -0.7970263 | 0.42543574 | 0.70377154 |
| Pgf     | 39.3795532 | -0.1515078 | 0.38527813 | -0.3932426 | 0.69414032 | 0.87496374 |
| Cux1    | 2410.08237 | -0.151748  | 0.19290607 | -0.7866417 | 0.43149166 | 0.70688509 |
| Psmb3   | 9638.9764  | -0.1517698 | 0.21422234 | -0.7084686 | 0.47865432 | 0.74302874 |
| Gmpr2   | 1513.86151 | -0.1518333 | 0.16048186 | -0.9461085 | 0.34409325 | 0.63732661 |
| Gm13490 | 0.86808868 | -0.1518965 | 0.23036343 | -0.6593778 | 0.50965321 | NA         |
| Dlx3    | 48.9659358 | -0.1519039 | 0.42741575 | -0.3554009 | 0.72228931 | 0.88729924 |
| Gm15760 | 29.0942757 | -0.1519647 | 0.43159687 | -0.3520988 | 0.72476419 | 0.88879488 |



|             |            |            |            |            |            |            |
|-------------|------------|------------|------------|------------|------------|------------|
| 2010107G12I | 65.4090775 | -0.1520461 | 0.377267   | -0.40302   | 0.68693353 | 0.87068415 |
| Rngtt       | 3800.77802 | -0.1521413 | 0.15485032 | -0.9825053 | 0.32585096 | 0.61926293 |
| Colec11     | 2.79624469 | -0.1521416 | 0.36334207 | -0.4187283 | 0.67541474 | NA         |
| Slc7a7      | 982.38564  | -0.1522089 | 0.27888611 | -0.5457746 | 0.58522092 | 0.81209791 |
| Efcab10     | 138.151011 | -0.1522715 | 0.40553629 | -0.3754817 | 0.70730226 | 0.88105428 |
| Slc25a13    | 12785.4807 | -0.1523563 | 0.15310633 | -0.995101  | 0.31968716 | 0.61338124 |
| Tprkb       | 2461.83594 | -0.1525865 | 0.19429542 | -0.7853323 | 0.43225879 | 0.70765938 |
| Ghr         | 31.8605471 | -0.1525985 | 0.43217133 | -0.3530972 | 0.72401559 | 0.88829071 |
| Ppp1r12a    | 5820.1959  | -0.1527945 | 0.21607168 | -0.7071472 | 0.479475   | 0.74369795 |
| Slc4a1ap    | 2930.81716 | -0.1528044 | 0.14821511 | -1.0309636 | 0.30255789 | 0.59790613 |
| Fbrs        | 1372.42428 | -0.152953  | 0.23159248 | -0.6604401 | 0.50897144 | 0.7637764  |
| Ctbs        | 837.04769  | -0.1530298 | 0.23651908 | -0.6470083 | 0.51762656 | 0.76807205 |
| Tecr        | 13243.5771 | -0.1530885 | 0.22536214 | -0.6793    | 0.4969478  | 0.7560535  |
| U2af1       | 14138.3238 | -0.1531611 | 0.18870048 | -0.8116623 | 0.41698543 | 0.69853931 |
| Pcbp2       | 40231.2585 | -0.1531992 | 0.17833968 | -0.8590302 | 0.39032387 | 0.67865904 |
| Enho        | 43.5761562 | -0.1532394 | 0.4162659  | -0.3681285 | 0.71277739 | 0.88385306 |
| 2810032G03I | 5.14768256 | -0.153262  | 0.35822274 | -0.4278399 | 0.66876766 | NA         |
| Gnao1       | 26.5967907 | -0.153271  | 0.42928081 | -0.3570414 | 0.72106078 | 0.88656328 |
| Trmt13      | 1125.48037 | -0.1533318 | 0.18618828 | -0.8235308 | 0.41020624 | 0.69309338 |
| Lrsam1      | 1094.79351 | -0.1533329 | 0.18868387 | -0.8126444 | 0.41642198 | 0.69837863 |
| Zbtb9       | 1584.81289 | -0.1533716 | 0.1790279  | -0.8566913 | 0.39161554 | 0.67961313 |
| Pcdhga11    | 105.501488 | -0.1534115 | 0.35585657 | -0.4311047 | 0.66639222 | 0.8585804  |
| 2510002D24I | 986.473688 | -0.1534241 | 0.23977938 | -0.6398552 | 0.52226676 | 0.77084692 |
| Mpz         | 10.3160272 | -0.1534272 | 0.4118452  | -0.3725362 | 0.70949367 | 0.8816794  |
| Pnpla7      | 743.521342 | -0.1534453 | 0.19297365 | -0.7951619 | 0.42651935 | 0.70402942 |
| Fabp3       | 7303.48261 | -0.1534474 | 0.30088532 | -0.5099864 | 0.61006098 | 0.82596711 |
| Klk1b9      | 2.67740618 | -0.1535132 | 0.29093419 | -0.5276561 | 0.59773806 | NA         |
| 9530036O11I | 1.36131383 | -0.1535135 | 0.25868733 | -0.5934325 | 0.55289172 | NA         |
| Sf3b3       | 33975.3468 | -0.153744  | 0.20826908 | -0.7381989 | 0.46039357 | 0.73086774 |
| Srrm3       | 14.4228103 | -0.1538157 | 0.42698014 | -0.3602408 | 0.71866707 | 0.88550762 |
| Lin9        | 2425.01723 | -0.1539971 | 0.16865803 | -0.9130733 | 0.361204   | 0.65193633 |
| Slc2a3      | 104067.734 | -0.154015  | 0.19574211 | -0.7868261 | 0.43138369 | 0.70688509 |
| Zc3h8       | 1312.11419 | -0.154023  | 0.17443568 | -0.8829788 | 0.3772477  | 0.66718742 |
| Fam3a       | 612.317768 | -0.1541085 | 0.19305985 | -0.7982422 | 0.42472997 | 0.70307615 |
| Utp3        | 9026.22951 | -0.1541187 | 0.17561638 | -0.8775874 | 0.38016767 | 0.66904058 |
| Mcu         | 1234.66699 | -0.1541809 | 0.1850385  | -0.833237  | 0.40471111 | 0.68911875 |
| Fut7        | 1.17343795 | -0.15421   | 0.22078592 | -0.6984593 | 0.48489001 | NA         |
| Zfp395      | 1873.54478 | -0.1542517 | 0.19149131 | -0.8055285 | 0.42051476 | 0.70082789 |
| Eml1        | 133.282624 | -0.1542651 | 0.28407177 | -0.5430499 | 0.58709546 | 0.81313872 |
| Zan         | 54.5063969 | -0.1543285 | 0.40207946 | -0.383826  | 0.70110742 | 0.87792265 |
| Gdf9        | 16.614553  | -0.1543335 | 0.42017431 | -0.3673082 | 0.71338914 | 0.88418475 |

|             |            |            |            |            |            |            |
|-------------|------------|------------|------------|------------|------------|------------|
| Myo16       | 2.10005515 | -0.1543785 | 0.28234623 | -0.5467702 | 0.5845366  | NA         |
| Gm5779      | 1.8761405  | -0.1544873 | 0.30832667 | -0.5010508 | 0.61633534 | NA         |
| Alg9        | 1928.18779 | -0.1545883 | 0.21897697 | -0.7059567 | 0.48021505 | 0.74407463 |
| Mum111      | 292.335935 | -0.1546752 | 0.32584779 | -0.4746853 | 0.63501127 | 0.83935914 |
| Traf1       | 70.3652365 | -0.1546874 | 0.37290318 | -0.4148192 | 0.67827424 | 0.86571263 |
| Car5a       | 151.70918  | -0.154691  | 0.33276264 | -0.4648689 | 0.64202536 | 0.84385084 |
| Unkl        | 493.364422 | -0.154713  | 0.25788187 | -0.5999373 | 0.54854799 | 0.78905465 |
| Mir7035     | 1.53285125 | -0.1547481 | 0.29264244 | -0.5287959 | 0.59694701 | NA         |
| Rpl35a      | 22301.5882 | -0.1547662 | 0.23345164 | -0.6629475 | 0.50736418 | 0.76261673 |
| 1700067G17I | 5.6015098  | -0.1548088 | 0.37199178 | -0.4161618 | 0.67729158 | NA         |
| Farp2       | 199.046198 | -0.1548226 | 0.27584095 | -0.5612749 | 0.57461016 | 0.806724   |
| Imp3        | 3702.79716 | -0.1549041 | 0.2118088  | -0.7313394 | 0.46457185 | 0.73397175 |
| Map9        | 912.28895  | -0.1550282 | 0.24726956 | -0.6269602 | 0.53068536 | 0.77760181 |
| Gpi1        | 38936.6585 | -0.1550768 | 0.18111751 | -0.8562221 | 0.39187494 | 0.67991155 |
| Shroom1     | 24.4593366 | -0.155151  | 0.43225945 | -0.3589303 | 0.7196472  | 0.88592422 |
| Cdkn1a      | 12900.9831 | -0.1551744 | 0.14350248 | -1.0813361 | 0.27954762 | 0.57200243 |
| Zfp341      | 483.532984 | -0.1551764 | 0.20199862 | -0.7682052 | 0.44236529 | 0.7159317  |
| Fn3k        | 3.51229072 | -0.1552935 | 0.3691017  | -0.4207335 | 0.67394969 | NA         |
| Ick         | 1158.0672  | -0.1554009 | 0.20698122 | -0.7507972 | 0.45277472 | 0.72423137 |
| Syp         | 52.5130502 | -0.1554677 | 0.34799295 | -0.4467553 | 0.65505173 | 0.85234189 |
| Dnaja2      | 21623.6183 | -0.1554937 | 0.17679804 | -0.8794992 | 0.37913068 | 0.66834881 |
| Gpr125      | 4686.66521 | -0.15564   | 0.24724409 | -0.6294995 | 0.52902208 | 0.77604138 |
| A530072M11  | 16.6636945 | -0.1556765 | 0.42963852 | -0.3623431 | 0.71709567 | 0.88488973 |
| Adcy1       | 535.290128 | -0.1556848 | 0.38255959 | -0.4069556 | 0.68404062 | 0.86895068 |
| Cope        | 4201.43087 | -0.1556849 | 0.19164316 | -0.8123687 | 0.41658011 | 0.69846225 |
| Ubxn2a      | 13899.5598 | -0.1557728 | 0.20091105 | -0.7753323 | 0.43814334 | 0.71192377 |
| Rbm34       | 4435.25701 | -0.1558877 | 0.26146945 | -0.5961986 | 0.55104254 | 0.79097822 |
| Mrfap1      | 15146.7    | -0.1559071 | 0.16219749 | -0.9612176 | 0.33644278 | 0.6291874  |
| Gm1968      | 1.97927288 | -0.1559805 | 0.30629271 | -0.509253  | 0.61057492 | NA         |
| Tlr7        | 5.95959811 | -0.1559935 | 0.40562051 | -0.38458   | 0.70054865 | 0.87785127 |
| Acadm       | 14754.5695 | -0.1560453 | 0.22706533 | -0.6872266 | 0.49193994 | 0.75208002 |
| Uggt1       | 16580.9261 | -0.1561277 | 0.17658315 | -0.8841595 | 0.37661011 | 0.66655796 |
| 4833420G17I | 2406.91481 | -0.1561422 | 0.18470171 | -0.8453751 | 0.39790142 | 0.68393999 |
| Herc6       | 87.5033335 | -0.1561554 | 0.38348781 | -0.4071978 | 0.68386273 | 0.86885207 |
| Pigq        | 3846.01694 | -0.1561749 | 0.16701225 | -0.9351105 | 0.34973138 | 0.64198366 |
| Tradd       | 857.955007 | -0.1562755 | 0.23726163 | -0.6586632 | 0.51011208 | 0.76433741 |
| Dock1       | 5756.2077  | -0.1564147 | 0.18767849 | -0.8334183 | 0.40460884 | 0.68911875 |
| Alkbh3      | 946.485599 | -0.1564445 | 0.2317149  | -0.6751593 | 0.49957455 | 0.75725268 |
| Trps1       | 3290.14665 | -0.1564779 | 0.19469592 | -0.8037038 | 0.42156805 | 0.70108061 |
| Setd1a      | 6656.82945 | -0.1565407 | 0.24708276 | -0.6335556 | 0.5263709  | 0.77414646 |
| Kansl2      | 2867.32643 | -0.1566148 | 0.18184265 | -0.8612657 | 0.38909174 | 0.67794934 |

|             |            |            |            |            |            |            |
|-------------|------------|------------|------------|------------|------------|------------|
| Abhd16b     | 3.79652673 | -0.1567564 | 0.39431156 | -0.3975446 | 0.69096591 | NA         |
| Eftud2      | 19303.3391 | -0.156793  | 0.20739435 | -0.7560138 | 0.44964091 | 0.72235184 |
| Mmp24       | 56.4234727 | -0.1568191 | 0.39156662 | -0.4004915 | 0.68879454 | 0.87198339 |
| Rbm43       | 610.40717  | -0.1568195 | 0.30410733 | -0.5156717 | 0.60608374 | 0.82418428 |
| Pex10       | 915.729498 | -0.1568482 | 0.18847098 | -0.8322142 | 0.40528805 | 0.68918911 |
| Mapk10      | 9.69379215 | -0.1569275 | 0.43216327 | -0.3631208 | 0.71651465 | 0.88475417 |
| Zfp706      | 12422.3764 | -0.1569581 | 0.16651544 | -0.9426036 | 0.34588368 | 0.63798328 |
| AA543186    | 20.4053341 | -0.1569919 | 0.41437372 | -0.3788654 | 0.70478784 | 0.87942876 |
| Tmem192     | 3120.80219 | -0.1569985 | 0.18388075 | -0.8538058 | 0.3932126  | 0.6808762  |
| Lonp1       | 11651.1567 | -0.1571281 | 0.19096448 | -0.8228133 | 0.41061415 | 0.69316769 |
| Gm16532     | 13.1869428 | -0.1571327 | 0.43213939 | -0.3636159 | 0.71614488 | 0.88475132 |
| Rsph9       | 72.9135425 | -0.1572184 | 0.41056515 | -0.3829316 | 0.7017705  | 0.87847002 |
| Pde6g       | 7.24027118 | -0.1572675 | 0.42443873 | -0.3705306 | 0.71098721 | 0.88254552 |
| Zfp691      | 315.25927  | -0.157407  | 0.25806528 | -0.6099505 | 0.54189461 | 0.78505055 |
| Slc15a3     | 2.04650806 | -0.1574193 | 0.30071955 | -0.5234753 | 0.60064352 | NA         |
| Ywhaq       | 8648.05212 | -0.1574503 | 0.21476254 | -0.7331368 | 0.46347503 | 0.73321466 |
| Fam53b      | 3211.19423 | -0.1575417 | 0.21321768 | -0.7388771 | 0.45998161 | 0.73058666 |
| 4933433G15l | 18.4702217 | -0.1575518 | 0.42974054 | -0.3666208 | 0.71390189 | 0.88425449 |
| Arl14ep     | 3914.7537  | -0.1576103 | 0.16478397 | -0.9564662 | 0.33883675 | 0.63247406 |
| Btbd8       | 89.2939554 | -0.1576894 | 0.32778979 | -0.4810686 | 0.63046771 | 0.83698167 |
| Ccdc130     | 1053.46134 | -0.1577543 | 0.21974442 | -0.7178991 | 0.47281953 | 0.73930088 |
| Sult6b1     | 1704.87026 | -0.1578534 | 0.30563297 | -0.5164803 | 0.60551896 | 0.82418428 |
| Ddx28       | 1437.72535 | -0.1578645 | 0.1916235  | -0.8238263 | 0.41003828 | 0.69303275 |
| Npy1r       | 4.82052349 | -0.1579964 | 0.38334541 | -0.4121517 | 0.68022826 | NA         |
| Xylt2       | 2233.50147 | -0.1580246 | 0.19475272 | -0.8114115 | 0.41712939 | 0.69868745 |
| Tusc5       | 3.18032934 | -0.1580372 | 0.37514662 | -0.4212678 | 0.67355952 | NA         |
| Chd9        | 4801.36256 | -0.1580674 | 0.31223552 | -0.506244  | 0.61268537 | 0.82786256 |
| Gpn1        | 5327.26311 | -0.1584521 | 0.19294363 | -0.8212352 | 0.4115123  | 0.69415639 |
| Hmbox1      | 862.682489 | -0.1586285 | 0.28072432 | -0.5650686 | 0.57202711 | 0.80545169 |
| Tppp3       | 176.422922 | -0.158673  | 0.40403862 | -0.3927174 | 0.69452819 | 0.87496374 |
| Rasa3       | 1498.34004 | -0.1587007 | 0.21314836 | -0.7445553 | 0.45654061 | 0.72705202 |
| Acvrl1      | 29.646279  | -0.1587077 | 0.40850977 | -0.3885041 | 0.69764301 | 0.87645821 |
| Mir6912     | 1.44413271 | -0.1587112 | 0.25722523 | -0.6170127 | 0.53722636 | NA         |
| Gm15787     | 6.06431085 | -0.1587262 | 0.41506456 | -0.3824133 | 0.70215483 | 0.87871973 |
| Ddx5        | 70681.4356 | -0.1588837 | 0.1741551  | -0.9123116 | 0.3616047  | 0.6523567  |
| Coa5        | 7131.26921 | -0.1589928 | 0.18813742 | -0.8450889 | 0.39806121 | 0.6840055  |
| Abcb6       | 1358.75991 | -0.1589955 | 0.1650337  | -0.9634126 | 0.33534052 | 0.62800397 |
| Fiz1        | 6196.82445 | -0.1590043 | 0.19610199 | -0.8108245 | 0.41746644 | 0.69868745 |
| Ctsp2       | 1881.04513 | -0.1590797 | 0.21820753 | -0.7290292 | 0.46598383 | 0.73494062 |
| Dnase2b     | 1.2690372  | -0.1591144 | 0.22221086 | -0.7160512 | 0.47395973 | NA         |
| 2310043L19F | 1.2690372  | -0.1591144 | 0.22221086 | -0.7160512 | 0.47395973 | NA         |

|             |            |            |            |            |            |            |
|-------------|------------|------------|------------|------------|------------|------------|
| Adck1       | 1542.12316 | -0.1591423 | 0.21172787 | -0.7516362 | 0.45226987 | 0.72418129 |
| Epc2        | 3326.24313 | -0.159163  | 0.20755172 | -0.7668595 | 0.44316504 | 0.71664974 |
| Tmem235     | 12.1850495 | -0.1591843 | 0.4322577  | -0.3682625 | 0.71267748 | 0.88384872 |
| Ift81       | 1280.49423 | -0.1591859 | 0.20646627 | -0.7710019 | 0.4407058  | 0.71471643 |
| Bphl        | 590.475885 | -0.159236  | 0.26459991 | -0.6017993 | 0.54730776 | 0.78821846 |
| Themis      | 1.22437881 | -0.1593511 | 0.22003681 | -0.724202  | 0.46894171 | NA         |
| E330009J07R | 126.430584 | -0.1594062 | 0.32067666 | -0.4970932 | 0.61912336 | 0.83092413 |
| Hist1h1e    | 6.9296694  | -0.159409  | 0.41177953 | -0.3871223 | 0.69866567 | 0.87705439 |
| Ptchd3      | 94.4947256 | -0.1594182 | 0.41472326 | -0.3843965 | 0.7006846  | 0.87785127 |
| Tsacc       | 327.334368 | -0.1594266 | 0.29851429 | -0.5340668 | 0.59329531 | 0.81706831 |
| Glrp1       | 37.4662638 | -0.1594606 | 0.4149675  | -0.3842724 | 0.70077655 | 0.87785127 |
| Prkrip1     | 1635.5348  | -0.1594735 | 0.18216055 | -0.8754557 | 0.381326   | 0.67035955 |
| Hes7        | 3.19563224 | -0.1595055 | 0.37812531 | -0.4218323 | 0.67314742 | NA         |
| 2210420H20I | 3.19563224 | -0.1595055 | 0.37812531 | -0.4218323 | 0.67314742 | NA         |
| Hdac10      | 360.884942 | -0.1595368 | 0.23030189 | -0.6927291 | 0.48847959 | 0.74951614 |
| Wnt7a       | 19.8799337 | -0.1596378 | 0.42969319 | -0.3715157 | 0.71025345 | 0.88198926 |
| Cep120      | 4987.41152 | -0.1596549 | 0.16814628 | -0.9495003 | 0.34236623 | 0.63602165 |
| Cnp         | 1798.88338 | -0.1596748 | 0.18377642 | -0.8688538 | 0.38492708 | 0.67409922 |
| Zg16        | 2.91705565 | -0.1597792 | 0.35901692 | -0.4450464 | 0.65628625 | NA         |
| Dhx33       | 4233.89973 | -0.1597797 | 0.20217247 | -0.7903139 | 0.42934446 | 0.70526416 |
| Lrch3       | 2223.33661 | -0.1597868 | 0.21487636 | -0.7436222 | 0.45710507 | 0.72765288 |
| Met         | 198.443377 | -0.1598823 | 0.29272063 | -0.5461941 | 0.58493255 | 0.81187844 |
| Dcaf15      | 3842.96879 | -0.1598919 | 0.19498306 | -0.8200295 | 0.41219931 | 0.69478771 |
| Fhl3        | 534.23908  | -0.1599026 | 0.30396794 | -0.526051  | 0.59885275 | 0.82005546 |
| Abhd3       | 110.078525 | -0.1599135 | 0.3057076  | -0.523093  | 0.60090954 | 0.82144376 |
| Asxl1       | 7976.87792 | -0.1599854 | 0.23057656 | -0.6938492 | 0.48777677 | 0.74917686 |
| Mpi         | 3186.18052 | -0.16005   | 0.21159725 | -0.7563897 | 0.44941559 | 0.72228832 |
| Ech1        | 4675.61982 | -0.1601968 | 0.21294642 | -0.7522869 | 0.45187855 | 0.7239274  |
| Mms19       | 7785.50831 | -0.1602603 | 0.16289519 | -0.9838245 | 0.32520182 | 0.6188465  |
| Rrp1b       | 9070.6777  | -0.1602722 | 0.20694209 | -0.7744783 | 0.43864799 | 0.71227054 |
| Marf1       | 5961.69317 | -0.1603006 | 0.1763795  | -0.9088395 | 0.36343488 | 0.65367309 |
| Wdr83       | 1134.38129 | -0.1603373 | 0.20095396 | -0.7978805 | 0.42493983 | 0.70330346 |
| Vac14       | 4701.6697  | -0.1603688 | 0.268735   | -0.5967543 | 0.55067147 | 0.79097822 |
| Ppfia1      | 4351.65363 | -0.1603744 | 0.22589441 | -0.709953  | 0.47773326 | 0.7424775  |
| Trim12c     | 1303.90645 | -0.1603798 | 0.26996902 | -0.5940674 | 0.55246702 | 0.79183545 |
| Al467606    | 971.822178 | -0.1603974 | 0.20026735 | -0.8009165 | 0.42318002 | 0.70209373 |
| Rccd1       | 755.218915 | -0.1604142 | 0.20561708 | -0.7801597 | 0.43529689 | 0.70957043 |
| Gga2        | 14699.4042 | -0.1604626 | 0.1954256  | -0.8210932 | 0.41159316 | 0.69421748 |
| Mpnd        | 4749.74564 | -0.1604649 | 0.22674247 | -0.7076967 | 0.47913365 | 0.7432908  |
| Pole        | 12173.9108 | -0.16049   | 0.21926918 | -0.7319316 | 0.46421033 | 0.73383462 |
| Ngrn        | 3040.34458 | -0.1605907 | 0.19849513 | -0.8090412 | 0.41849147 | 0.69931842 |

|             |            |            |            |            |            |            |
|-------------|------------|------------|------------|------------|------------|------------|
| Polr2c      | 5566.89808 | -0.1606735 | 0.17532404 | -0.9164374 | 0.35943753 | 0.65018613 |
| Lama1       | 6788.42762 | -0.1607755 | 0.28901559 | -0.5562866 | 0.57801494 | 0.80768356 |
| Rps2        | 74309.3182 | -0.1607924 | 0.20409331 | -0.7878378 | 0.43079159 | 0.70667088 |
| Muc19       | 3.23584313 | -0.1608553 | 0.32482762 | -0.495202  | 0.62045752 | NA         |
| 5430416N02I | 983.016706 | -0.1608702 | 0.20292658 | -0.7927506 | 0.42792317 | 0.70472095 |
| Ntn5        | 30.3859395 | -0.1610063 | 0.42587521 | -0.3780598 | 0.70538615 | 0.87987969 |
| Cdc45       | 6089.95185 | -0.1610543 | 0.16411378 | -0.9813576 | 0.32641642 | 0.61957682 |
| Mir6942     | 4.01821254 | -0.1610674 | 0.38085542 | -0.4229094 | 0.67236133 | NA         |
| Tyw5        | 1451.62463 | -0.1610869 | 0.1810599  | -0.8896886 | 0.37363314 | 0.66335985 |
| Rrp1        | 11534.476  | -0.1610966 | 0.20016894 | -0.8048033 | 0.42093322 | 0.70091929 |
| Pcdh1       | 42.5216713 | -0.1611467 | 0.43133604 | -0.373599  | 0.70870268 | 0.88125982 |
| Ranbp1      | 25424.3773 | -0.1611753 | 0.16823644 | -0.9580284 | 0.33804846 | 0.63124298 |
| Arhgap21    | 5535.56581 | -0.1612326 | 0.23580623 | -0.6837502 | 0.49413293 | 0.75428042 |
| Kctd10      | 2177.00945 | -0.161244  | 0.21350004 | -0.7552412 | 0.45010427 | 0.72275987 |
| Actl10      | 2.06851614 | -0.1613048 | 0.25153047 | -0.6412934 | 0.5213321  | NA         |
| Gm13251     | 4396.885   | -0.1613619 | 0.23040523 | -0.7003398 | 0.48371515 | 0.74647754 |
| Alms1-ps2   | 6.78331057 | -0.1613623 | 0.41529035 | -0.3885529 | 0.69760693 | 0.87645821 |
| Trip13      | 5656.48553 | -0.1614218 | 0.15582936 | -1.0358882 | 0.30025431 | 0.59518862 |
| Rfx2        | 4533.04525 | -0.1614631 | 0.20502656 | -0.7875228 | 0.4309759  | 0.70682412 |
| Prodh2      | 4.93793934 | -0.161594  | 0.40380668 | -0.4001766 | 0.68902647 | NA         |
| Rasa4       | 3395.51007 | -0.161599  | 0.3429348  | -0.4712237 | 0.63748099 | 0.84125743 |
| Ddx47       | 6275.15378 | -0.161605  | 0.20405936 | -0.791951  | 0.42838925 | 0.7047819  |
| 2010109I03R | 0.9943674  | -0.1616642 | 0.19372601 | -0.834499  | 0.40399988 | NA         |
| Notch2      | 1950.22605 | -0.1617687 | 0.25286977 | -0.6397313 | 0.52234727 | 0.77084692 |
| Ajap1       | 3.16337684 | -0.1618384 | 0.37414351 | -0.4325569 | 0.66533667 | NA         |
| Zfp568      | 12728.2479 | -0.1619391 | 0.225062   | -0.7195312 | 0.4718137  | 0.73859646 |
| Gm16907     | 9.99227617 | -0.1620001 | 0.43197434 | -0.3750224 | 0.7076438  | 0.88112271 |
| Fam45a      | 3723.74132 | -0.1620088 | 0.23058651 | -0.7025946 | 0.48230841 | 0.74506649 |
| Phactr1     | 47.6564327 | -0.162027  | 0.34164608 | -0.4742541 | 0.63531875 | 0.83955149 |
| Polr2e      | 13783.3556 | -0.1621306 | 0.23704282 | -0.6839718 | 0.49399299 | 0.75418074 |
| Rbm3        | 10665.7753 | -0.1622871 | 0.17980571 | -0.9025695 | 0.36675443 | 0.65694132 |
| Tanc1       | 7134.10451 | -0.1623648 | 0.26416657 | -0.6146302 | 0.53879896 | 0.78263241 |
| Zfp276      | 748.858572 | -0.1624376 | 0.22366941 | -0.7262396 | 0.4676919  | 0.735927   |
| 1700028P14F | 2.45984585 | -0.1624516 | 0.35769206 | -0.454166  | 0.64970935 | NA         |
| Ecd         | 5929.98715 | -0.1625362 | 0.17151506 | -0.9476498 | 0.34330779 | 0.63670595 |
| A230050P20f | 958.849959 | -0.1628142 | 0.28435123 | -0.5725812 | 0.5669283  | 0.80254878 |
| Orc5        | 9188.70452 | -0.1629013 | 0.15478165 | -1.0524585 | 0.29258926 | 0.58640437 |
| Ttc13       | 4414.51563 | -0.1629014 | 0.18501209 | -0.8804908 | 0.37859347 | 0.66771292 |
| Sugp1       | 3083.27884 | -0.1629706 | 0.18488038 | -0.8814919 | 0.37805166 | 0.66762223 |
| Top3a       | 2658.93829 | -0.1630186 | 0.26256625 | -0.6208665 | 0.53468749 | 0.77984269 |
| Rnf214      | 1365.33533 | -0.1630381 | 0.24002137 | -0.6792651 | 0.4969699  | 0.7560535  |

|             |            |            |            |            |            |            |
|-------------|------------|------------|------------|------------|------------|------------|
| 2810006K23F | 1247.3402  | -0.1631404 | 0.18455876 | -0.8839484 | 0.37672406 | 0.66660394 |
| Dpm3        | 642.148112 | -0.1631528 | 0.31115024 | -0.5243536 | 0.60003262 | 0.82060569 |
| Psm12       | 16711.2459 | -0.1631585 | 0.16232599 | -1.0051284 | 0.31483504 | 0.6093449  |
| Ndufv1      | 8805.75987 | -0.1634556 | 0.17733566 | -0.9217303 | 0.35666929 | 0.64788348 |
| Mir6362     | 1.18692099 | -0.1634835 | 0.27619048 | -0.5919229 | 0.55390223 | NA         |
| Mapkapk5    | 4038.89019 | -0.1634902 | 0.15120375 | -1.0812573 | 0.27958269 | 0.57200243 |
| Rbm17       | 9797.04234 | -0.1636129 | 0.15069888 | -1.0856945 | 0.27761419 | 0.56992453 |
| Eif3b       | 26150.8915 | -0.1636896 | 0.19850376 | -0.8246172 | 0.40958896 | 0.69284177 |
| Tuba1c      | 7112.74743 | -0.1636963 | 0.20393039 | -0.8027066 | 0.42214434 | 0.70127884 |
| Cgn1        | 634.768292 | -0.1637531 | 0.42265696 | -0.3874375 | 0.69843237 | 0.87699868 |
| Tsc1        | 3405.24764 | -0.1637684 | 0.18992836 | -0.8622641 | 0.38854223 | 0.67760684 |
| Ppp2r3a     | 904.955321 | -0.1638155 | 0.33773486 | -0.4850419 | 0.62764666 | 0.8353812  |
| Trit1       | 2562.97444 | -0.1639592 | 0.17285144 | -0.9485558 | 0.34284659 | 0.63654819 |
| Stam2       | 4096.52869 | -0.1639839 | 0.16788639 | -0.9767552 | 0.32869034 | 0.62222868 |
| 2310009A05f | 311.843032 | -0.1640169 | 0.29836305 | -0.5497224 | 0.58250978 | 0.81000763 |
| Skiv2l      | 2703.11292 | -0.1640459 | 0.24381651 | -0.6728253 | 0.50105846 | 0.75819404 |
| Rbm15       | 1815.61487 | -0.164052  | 0.23537489 | -0.6969816 | 0.4858143  | 0.74775368 |
| Serpinb6a   | 6078.97697 | -0.1641163 | 0.19074135 | -0.860413  | 0.38956142 | 0.67794934 |
| Tmem132b    | 24.6872509 | -0.1641331 | 0.4267589  | -0.3846038 | 0.70053095 | 0.87785127 |
| Srl         | 1608.10565 | -0.1641524 | 0.21083195 | -0.7785934 | 0.43621924 | 0.7101063  |
| Oxtr        | 4.91611019 | -0.1641688 | 0.39165533 | -0.4191665 | 0.67509443 | NA         |
| Aff4        | 12990.4734 | -0.1643187 | 0.24521165 | -0.6701098 | 0.50278781 | 0.75933521 |
| Atxn2l      | 13869.3581 | -0.1644013 | 0.23065809 | -0.7127487 | 0.47600125 | 0.74134156 |
| Olf1316     | 2.64859916 | -0.1644465 | 0.22423059 | -0.7333812 | 0.46332598 | NA         |
| Atf4        | 23629.0406 | -0.1644796 | 0.17404149 | -0.9450595 | 0.34462851 | 0.63773152 |
| Ssb         | 30119.8396 | -0.1645834 | 0.18019899 | -0.9133424 | 0.36106248 | 0.65183221 |
| Pdap1       | 11528.1458 | -0.1646137 | 0.18520182 | -0.8888341 | 0.37409224 | 0.66364459 |
| Mir6904     | 3.22136139 | -0.1646827 | 0.37003295 | -0.4450488 | 0.65628449 | NA         |
| Gnb2        | 6936.23802 | -0.1647107 | 0.18916934 | -0.8707049 | 0.38391529 | 0.67307378 |
| Smg9        | 1158.6604  | -0.164809  | 0.21715752 | -0.7589375 | 0.44788997 | 0.72087942 |
| Yrdc        | 2792.01893 | -0.164868  | 0.17935077 | -0.9192488 | 0.35796543 | 0.64918023 |
| Raver2      | 852.544489 | -0.1649249 | 0.32245185 | -0.5114713 | 0.60902106 | 0.82570937 |
| Snx13       | 2365.25551 | -0.1649862 | 0.19925545 | -0.8280136 | 0.40766279 | 0.69149849 |
| Dtwd1       | 820.831328 | -0.1649911 | 0.22076016 | -0.7473773 | 0.45483584 | 0.72537711 |
| Clk3        | 3991.02016 | -0.1650201 | 0.18929367 | -0.8717676 | 0.38333515 | 0.67244726 |
| Celf1       | 23727.1802 | -0.1650536 | 0.1928482  | -0.8558732 | 0.39206793 | 0.6800532  |
| 9930014A18f | 36.289282  | -0.1651064 | 0.41259423 | -0.4001666 | 0.68903378 | 0.87214425 |
| Gk2         | 1.36908361 | -0.1652064 | 0.2625102  | -0.6293333 | 0.5291309  | NA         |
| Rab8b       | 1973.461   | -0.1652411 | 0.18077138 | -0.9140891 | 0.36067003 | 0.65157755 |
| Osbp18      | 2155.26986 | -0.1652513 | 0.25738524 | -0.6420387 | 0.52084808 | 0.76986886 |
| Sox11       | 609.229927 | -0.1652891 | 0.38681106 | -0.4273124 | 0.66915184 | 0.86021164 |

|             |            |            |            |            |            |            |
|-------------|------------|------------|------------|------------|------------|------------|
| Stk25       | 5690.74799 | -0.165411  | 0.18427629 | -0.8976248 | 0.36938559 | 0.65967648 |
| Pgr         | 55.1137836 | -0.1654151 | 0.42822624 | -0.3862796 | 0.69928958 | 0.87735184 |
| Slc9b2      | 6.37861957 | -0.1654642 | 0.35292925 | -0.4688311 | 0.63919033 | 0.84223427 |
| BC029722    | 450.649169 | -0.1655708 | 0.20672509 | -0.8009227 | 0.42317637 | 0.70209373 |
| Gja3        | 7.04334652 | -0.1656061 | 0.40382069 | -0.4100981 | 0.68173398 | 0.86734737 |
| Gas2        | 745.168228 | -0.1656306 | 0.24924635 | -0.6645255 | 0.50635403 | 0.7617875  |
| Mir762      | 3.27014165 | -0.1656678 | 0.37187617 | -0.4454918 | 0.65596441 | NA         |
| Eri3        | 2268.6964  | -0.1656711 | 0.16792523 | -0.9865769 | 0.32385012 | 0.618534   |
| Csnk1a1     | 21106.0237 | -0.1658469 | 0.17204272 | -0.9639865 | 0.33505268 | 0.62800397 |
| Psmc5       | 16380.3465 | -0.1659929 | 0.19422539 | -0.8546408 | 0.39275004 | 0.68067044 |
| Cbr4        | 924.040521 | -0.1660294 | 0.26025721 | -0.6379435 | 0.52351046 | 0.77157293 |
| Cacnb1      | 705.146562 | -0.1660413 | 0.42718708 | -0.3886852 | NA         | NA         |
| D930016D06  | 1019.03194 | -0.1660836 | 0.19309326 | -0.8601213 | 0.38972217 | 0.67799188 |
| Sbk2        | 35.0968617 | -0.1660851 | 0.42734    | -0.3886487 | 0.69753607 | 0.87645821 |
| Snrpb       | 13480.2219 | -0.1661069 | 0.18750999 | -0.8858562 | 0.37569502 | 0.6654252  |
| 1700056E22F | 11.6453821 | -0.166121  | 0.43226371 | -0.3843047 | 0.70075262 | 0.87785127 |
| Stxbp3a     | 1710.32168 | -0.1661283 | 0.15909834 | -1.0441862 | 0.29639927 | 0.59122008 |
| Wdr3        | 9143.34517 | -0.1661284 | 0.17238453 | -0.9637081 | 0.33519229 | 0.62800397 |
| Vps52       | 2564.44205 | -0.1661547 | 0.24612935 | -0.6750707 | 0.49963084 | 0.75725268 |
| Gnai3       | 11326.8036 | -0.166213  | 0.16648633 | -0.9983581 | 0.31810574 | 0.61200821 |
| Noxa1       | 3.69012433 | -0.1663267 | 0.31701557 | -0.5246642 | 0.59981668 | NA         |
| Mir7067     | 2.23269596 | -0.1664164 | 0.28983841 | -0.5741696 | 0.56585305 | NA         |
| Upf1        | 8235.46006 | -0.1664231 | 0.25544325 | -0.651507  | 0.51471924 | 0.76641122 |
| Pus7        | 4904.56265 | -0.1664795 | 0.17982977 | -0.9257615 | 0.35456995 | 0.64618462 |
| Tubgcp3     | 3277.70792 | -0.1665857 | 0.19868245 | -0.8384521 | 0.40177683 | 0.68675204 |
| Fam213a     | 2101.93916 | -0.166661  | 0.32530613 | -0.5123204 | 0.6084268  | 0.82562526 |
| Det1        | 707.208473 | -0.1667436 | 0.17682171 | -0.9430043 | 0.34567871 | 0.63790477 |
| Taf1b       | 2629.45152 | -0.1667583 | 0.19726607 | -0.8453472 | 0.39791702 | 0.68393999 |
| Nhp2        | 12783.7899 | -0.1668244 | 0.23146717 | -0.7207262 | 0.47107801 | 0.73829186 |
| Brix1       | 14598.5014 | -0.1668845 | 0.16977835 | -0.982955  | 0.32562957 | 0.61915114 |
| Pdlim4      | 246.914039 | -0.1668861 | 0.41581425 | -0.4013478 | NA         | NA         |
| Srsf2       | 34125.4362 | -0.1670727 | 0.19521546 | -0.8558373 | 0.39208777 | 0.6800532  |
| Nrbp1       | 6052.98356 | -0.1670956 | 0.14948645 | -1.1177976 | 0.26365343 | 0.55541671 |
| Celf4       | 307.315727 | -0.1670966 | 0.37034778 | -0.4511883 | 0.65185381 | 0.84981368 |
| BC051142    | 2.07464158 | -0.1671185 | 0.30984904 | -0.5393545 | 0.5896423  | NA         |
| Ddx39       | 14878.7733 | -0.1671348 | 0.24491935 | -0.6824075 | 0.49498134 | 0.75502254 |
| Fam174a     | 459.591846 | -0.167171  | 0.28161704 | -0.5936111 | 0.55277223 | 0.79205389 |
| Man2c1      | 3134.95143 | -0.1672504 | 0.17998418 | -0.9292505 | 0.3527593  | 0.64439796 |
| Proca1      | 230.181571 | -0.1672799 | 0.26447068 | -0.6325084 | 0.52705473 | 0.7745763  |
| Rdh9        | 1.92592764 | -0.1672913 | 0.30985958 | -0.5398938 | 0.58927029 | NA         |
| Wwp2        | 7449.44633 | -0.1673055 | 0.18433491 | -0.9076173 | 0.36408047 | 0.65406636 |

|             |            |            |            |            |            |            |
|-------------|------------|------------|------------|------------|------------|------------|
| 4930444P10F | 2.49685262 | -0.1673893 | 0.35472682 | -0.4718824 | 0.63701072 | NA         |
| Ube2o       | 5451.27809 | -0.1673898 | 0.18304289 | -0.9144839 | 0.36046264 | 0.65135423 |
| Psm1        | 16104.9334 | -0.1673981 | 0.1649569  | -1.0147991 | 0.31020161 | 0.60486516 |
| Sirt6       | 1689.5048  | -0.1674531 | 0.21074562 | -0.7945745 | 0.42686107 | 0.70402942 |
| Gtf2h4      | 2315.68921 | -0.1674583 | 0.21969214 | -0.7622405 | 0.44591646 | 0.71907897 |
| Acap2       | 4380.31356 | -0.1675264 | 0.2310564  | -0.7250457 | 0.468424   | 0.73622497 |
| Csnk2a2     | 3791.94726 | -0.1675446 | 0.22265917 | -0.7524714 | 0.45176764 | 0.72382429 |
| Zfp703      | 192.116642 | -0.1675739 | 0.39153284 | -0.4279946 | 0.66865505 | 0.8600411  |
| Rhpn2       | 2482.1656  | -0.1676292 | 0.27595961 | -0.6074409 | 0.54355836 | 0.78603486 |
| Ccdc120     | 791.904347 | -0.1677312 | 0.26265988 | -0.6385872 | 0.52309149 | 0.77134419 |
| Ncoa6       | 6767.97468 | -0.1678625 | 0.19323296 | -0.8687054 | 0.38500831 | 0.67416554 |
| Nup214      | 7332.44307 | -0.1679507 | 0.26755535 | -0.6277233 | 0.53018522 | 0.77730841 |
| Mapk1       | 22573.4133 | -0.1680461 | 0.15587018 | -1.0781161 | 0.28098196 | 0.5730558  |
| Srd5a3      | 1041.84112 | -0.1680644 | 0.22113045 | -0.7600236 | 0.44724045 | 0.72045935 |
| Larp4b      | 6537.74802 | -0.1680883 | 0.21920489 | -0.766809  | 0.44319509 | 0.71664974 |
| 5830418P13F | 101.624612 | -0.1680938 | 0.30623419 | -0.548906  | 0.58306995 | 0.81058367 |
| Rpl37a      | 25262.4887 | -0.1681634 | 0.23115228 | -0.7275005 | 0.46691942 | 0.73559557 |
| 2410018L13F | 111.984109 | -0.1683487 | 0.41881679 | -0.4019627 | 0.68771148 | 0.87089586 |
| Pcid2       | 3431.01797 | -0.1684021 | 0.20777256 | -0.8105118 | 0.41764609 | 0.69868745 |
| Mif         | 18266.5998 | -0.16842   | 0.23300262 | -0.7228246 | 0.46978763 | 0.73764816 |
| Ednra       | 7.00613146 | -0.1684451 | 0.42088316 | -0.4002182 | 0.68899584 | 0.87214425 |
| Timm8a1     | 396.610069 | -0.1685163 | 0.20489138 | -0.8224665 | 0.41081145 | 0.69330421 |
| Ift74       | 2490.78836 | -0.1685515 | 0.18119244 | -0.9302348 | 0.35224955 | 0.64439796 |
| Arid5a      | 313.724331 | -0.1685844 | 0.27144138 | -0.621071  | 0.53455292 | 0.77984269 |
| Mast1       | 280.079672 | -0.1686113 | 0.31668829 | -0.5324205 | 0.59443482 | 0.81778194 |
| Cbln4       | 2.60879643 | -0.1686385 | 0.34717622 | -0.4857433 | 0.62714919 | NA         |
| Amacr       | 1007.30867 | -0.1686828 | 0.19271343 | -0.8753037 | 0.3814087  | 0.67042915 |
| Slc44a3     | 134.58342  | -0.1687395 | 0.38074194 | -0.443186  | 0.65763122 | 0.85322343 |
| Gm10782     | 1.10489216 | -0.1687439 | 0.19748945 | -0.854445  | 0.39285847 | NA         |
| Larp1       | 16149.5181 | -0.1688494 | 0.24028926 | -0.7026924 | 0.48224745 | 0.74506649 |
| Rnf152      | 153.477688 | -0.1688549 | 0.35157692 | -0.4802788 | 0.63102915 | 0.8373696  |
| Clca5       | 3.05342162 | -0.1689095 | 0.33999675 | -0.4967974 | 0.61933194 | NA         |
| Syf2        | 3821.9416  | -0.168967  | 0.1999051  | -0.845236  | 0.3979791  | 0.68393999 |
| Lactb2      | 11181.7083 | -0.1689974 | 0.19949663 | -0.8471189 | 0.39692887 | 0.68311652 |
| Tspan14     | 6542.96668 | -0.1690121 | 0.26086346 | -0.6478949 | 0.51705293 | 0.76793048 |
| Ppil4       | 4859.35077 | -0.1690952 | 0.15631203 | -1.0817799 | 0.27935034 | 0.57190325 |
| Prss16      | 273.596787 | -0.1691248 | 0.31368966 | -0.5391467 | 0.58978562 | 0.8151223  |
| Pafah1b3    | 2347.83286 | -0.16916   | 0.25565661 | -0.6616687 | 0.50818359 | 0.76323954 |
| Ip6k3       | 3.13309457 | -0.1692621 | 0.33758112 | -0.5013968 | 0.61609192 | NA         |
| Mterfd1     | 2973.76617 | -0.1692876 | 0.15472256 | -1.0941365 | 0.27389513 | 0.56683453 |
| Yipf6       | 2410.77533 | -0.1693082 | 0.16223425 | -1.0436035 | 0.29666887 | 0.59122008 |



|             |            |            |            |            |            |            |
|-------------|------------|------------|------------|------------|------------|------------|
| Fgfr1op     | 4997.84322 | -0.1693141 | 0.15520885 | -1.0908794 | 0.27532595 | 0.56762479 |
| Lrrc40      | 7580.9204  | -0.169346  | 0.16537243 | -1.0240279 | 0.30582211 | 0.60010595 |
| Mettl21e    | 4.00674726 | -0.1694733 | 0.2723435  | -0.6222779 | 0.53375915 | NA         |
| Carf        | 563.47129  | -0.1695052 | 0.23554536 | -0.7196288 | 0.4717536  | 0.73859646 |
| Tfdp1       | 10889.0263 | -0.1695109 | 0.20474481 | -0.827913  | 0.40771976 | 0.69150943 |
| Aifm3       | 316.790456 | -0.1695875 | 0.38165733 | -0.4443449 | 0.65679322 | 0.85275541 |
| Snord72     | 131.569376 | -0.1696048 | 0.2843622  | -0.5964395 | 0.55088168 | 0.79097822 |
| Pnpla6      | 6197.74147 | -0.1696284 | 0.28773021 | -0.5895398 | 0.55549925 | 0.79471654 |
| Nelfe       | 3797.20254 | -0.1697859 | 0.18475261 | -0.9189903 | 0.35810064 | 0.64926373 |
| Cln5        | 3311.18124 | -0.1698764 | 0.16407542 | -1.0353556 | 0.30050289 | 0.59541367 |
| Clic4       | 14562.9046 | -0.1698955 | 0.17458969 | -0.9731129 | 0.33049719 | 0.62369343 |
| Lias        | 3316.94872 | -0.1699024 | 0.16495509 | -1.0299918 | 0.30301385 | 0.59829461 |
| Tnfaip1     | 3187.03501 | -0.1699793 | 0.20956513 | -0.8111051 | 0.4173053  | 0.69868745 |
| Mybl2       | 25969.1568 | -0.1702025 | 0.18450742 | -0.9224699 | 0.35628351 | 0.64764054 |
| Mrpl21      | 3437.89721 | -0.1702221 | 0.19058634 | -0.8931495 | 0.37177712 | 0.66180243 |
| Enpep       | 3.9615002  | -0.1702426 | 0.38969997 | -0.4368557 | 0.66221601 | NA         |
| Xpc         | 2439.66956 | -0.170283  | 0.17069999 | -0.997557  | 0.31849424 | 0.61238106 |
| Ltbp3       | 131.042079 | -0.1702963 | 0.4015276  | -0.424121  | 0.67147759 | 0.86170733 |
| Txndc9      | 5838.82618 | -0.170313  | 0.17433895 | -0.9769074 | 0.328615   | 0.62221988 |
| Zfp239      | 924.122795 | -0.1703767 | 0.19740124 | -0.8630982 | 0.38808347 | 0.67726249 |
| Cdk2ap2     | 1492.1919  | -0.1703816 | 0.24376026 | -0.6989719 | 0.4845696  | 0.74712338 |
| Rffl        | 2307.1054  | -0.1703834 | 0.18406203 | -0.9256845 | 0.35460996 | 0.64618462 |
| Rfx3        | 550.150743 | -0.1704471 | 0.24282757 | -0.7019266 | 0.48272496 | 0.74531928 |
| Kcnk12      | 16.337048  | -0.1704534 | 0.43175401 | -0.3947928 | 0.69299579 | 0.87461511 |
| Gabpb2      | 6119.63475 | -0.1705593 | 0.21252014 | -0.8025561 | 0.42223137 | 0.70128378 |
| Tbc1d10a    | 2303.34743 | -0.1705637 | 0.20420243 | -0.8352678 | 0.40356694 | 0.68791729 |
| 1110017D15I | 2.09947591 | -0.1705659 | 0.31016891 | -0.549913  | 0.58237906 | NA         |
| Mphosph9    | 2458.79488 | -0.1706382 | 0.21601307 | -0.7899437 | 0.42956064 | 0.70542013 |
| Prx         | 2536.43345 | -0.1706567 | 0.22737368 | -0.750556  | 0.45291992 | 0.72429938 |
| Sp3os       | 278.226453 | -0.1706842 | 0.28416681 | -0.600648  | 0.54807446 | 0.78881129 |
| Nol7        | 5757.79732 | -0.1707033 | 0.16010665 | -1.0661848 | 0.28634011 | 0.57949961 |
| Gm5177      | 13.0666464 | -0.1707379 | 0.43118933 | -0.3959697 | 0.69212737 | 0.87435197 |
| lpcef1      | 1.37944347 | -0.1707853 | 0.22666662 | -0.7534648 | 0.45117064 | NA         |
| Gtf3c2      | 10341.205  | -0.1707882 | 0.21428306 | -0.7970213 | 0.42543866 | 0.70377154 |
| Podxl2      | 79.619816  | -0.1707999 | 0.34445737 | -0.4958522 | 0.61999869 | 0.83138912 |
| Tmc4        | 336.302656 | -0.1708422 | 0.37669904 | -0.4535243 | 0.65017122 | 0.84900546 |
| Nup98       | 13111.1974 | -0.1708806 | 0.23233331 | -0.7354978 | 0.46203641 | 0.73220505 |
| Actr5       | 735.737989 | -0.1708878 | 0.23652152 | -0.7225041 | 0.46998463 | 0.73765956 |
| Ddx54       | 8482.58471 | -0.1709612 | 0.20718623 | -0.8251572 | 0.40928233 | 0.69272416 |
| Wrnip1      | 3062.62427 | -0.1709908 | 0.15070576 | -1.1346003 | 0.25654284 | 0.54959329 |
| Rnf139      | 2384.22885 | -0.1710236 | 0.17661169 | -0.9683596 | 0.33286481 | 0.6260741  |

|             |            |            |            |            |            |            |
|-------------|------------|------------|------------|------------|------------|------------|
| Klf12       | 139.015539 | -0.1710649 | 0.38522134 | -0.444069  | 0.65699269 | 0.85282916 |
| Pwp2        | 6168.71835 | -0.1712264 | 0.21703411 | -0.7889379 | 0.43014828 | 0.70591345 |
| Zfp747      | 448.694356 | -0.1713746 | 0.20590102 | -0.8323157 | 0.4052308  | 0.68916712 |
| 2410003L11F | 1273.59914 | -0.1713935 | 0.19385898 | -0.8841141 | 0.37663461 | 0.66655796 |
| Rgs16       | 21.5032453 | -0.1714644 | 0.42472344 | -0.4037083 | 0.68642721 | 0.87054555 |
| Krt83       | 4.4752816  | -0.1715043 | 0.37597339 | -0.4561608 | 0.64827433 | NA         |
| Rtcb        | 13825.6958 | -0.1716526 | 0.2025806  | -0.8473297 | 0.39681137 | 0.68311652 |
| Ubn2        | 3061.11745 | -0.1716882 | 0.23804654 | -0.7212379 | 0.47076314 | 0.73825174 |
| Tmem17      | 328.528958 | -0.1716945 | 0.27797086 | -0.6176707 | 0.53679243 | 0.78097821 |
| Tmem138     | 778.054347 | -0.1717429 | 0.20108883 | -0.8540648 | 0.39306908 | 0.6808735  |
| Tas2r137    | 0.68223978 | -0.1717858 | 0.19906053 | -0.8629826 | 0.38814705 | NA         |
| Ppp6r3      | 20744.2823 | -0.1718237 | 0.16340324 | -1.0515319 | 0.29301439 | 0.58676317 |
| Esr1        | 2.07299198 | -0.171849  | 0.31137044 | -0.5519117 | 0.58100885 | NA         |
| Pus3        | 1716.11257 | -0.1718505 | 0.18228312 | -0.942767  | 0.34580009 | 0.63790477 |
| 1110002L01F | 1109.93226 | -0.1718694 | 0.25511509 | -0.6736935 | 0.50050621 | 0.75785125 |
| 9430020K01F | 1352.14313 | -0.1719492 | 0.29277862 | -0.5873011 | 0.55700153 | 0.7958333  |
| Gskip       | 496.852319 | -0.1719858 | 0.22932867 | -0.7499534 | 0.45328276 | 0.72431158 |
| Arhgef11    | 2407.42443 | -0.1720145 | 0.21226212 | -0.8103872 | 0.41771769 | 0.69871225 |
| Hid1        | 286.558193 | -0.1720753 | 0.24220163 | -0.7104632 | 0.47741696 | 0.74228266 |
| Myo9a       | 3844.41725 | -0.1721233 | 0.22824574 | -0.754114  | 0.4507808  | 0.7229937  |
| Il17f       | 36.5874486 | -0.1721866 | 0.4316139  | -0.3989368 | 0.68993981 | 0.87286479 |
| Pgbd1       | 248.371384 | -0.1721938 | 0.2745926  | -0.6270884 | 0.53060128 | 0.77760181 |
| Kpna3       | 14390.5282 | -0.1723176 | 0.18927698 | -0.9103991 | 0.36261206 | 0.65337545 |
| Hnf1a       | 432.350988 | -0.1724279 | 0.20911304 | -0.8245677 | 0.40961704 | 0.69284177 |
| 4930503E24F | 9.18618553 | -0.1724338 | 0.4189068  | -0.411628  | 0.68061212 | 0.86680489 |
| Samsn1      | 5.43744697 | -0.1724464 | 0.40123221 | -0.4297921 | 0.66734688 | NA         |
| Cdr2        | 1957.67022 | -0.1725417 | 0.1618987  | -1.0657388 | 0.28654175 | 0.57968137 |
| Cpvl        | 324.818821 | -0.1726959 | 0.41373787 | -0.4174042 | 0.67638277 | 0.864488   |
| Rad1        | 3463.05263 | -0.1727445 | 0.1966562  | -0.8784085 | 0.37972209 | 0.66881593 |
| Sos1        | 4091.34715 | -0.1728209 | 0.23300182 | -0.741715  | 0.45826005 | 0.72889455 |
| Ppp2r2c     | 5757.57567 | -0.1728363 | 0.19395947 | -0.8910947 | 0.37287835 | 0.6627007  |
| Slc29a2     | 962.941521 | -0.1729579 | 0.21751011 | -0.795172  | 0.42651347 | 0.70402942 |
| 4932412D23I | 52.6459467 | -0.1729677 | 0.40600073 | -0.4260281 | 0.67008739 | 0.86084502 |
| Wdr73       | 2979.30333 | -0.1730089 | 0.17635161 | -0.9810452 | 0.32657048 | 0.61970683 |
| Zfp607      | 950.393867 | -0.1731001 | 0.19053985 | -0.9084721 | 0.36362885 | 0.6537332  |
| Trp53bp1    | 6795.59055 | -0.1731475 | 0.21405669 | -0.8088861 | 0.41858065 | 0.69932829 |
| Chaf1a      | 6985.39075 | -0.1732785 | 0.20197378 | -0.8579258 | 0.39093342 | 0.67903559 |
| Mif4gd      | 3758.08758 | -0.1733032 | 0.24797108 | -0.6988846 | 0.48462416 | 0.74712338 |
| Hcfc1       | 24267.3725 | -0.1734383 | 0.25671991 | -0.6755934 | 0.4992988  | 0.75708397 |
| Ckmt2       | 0.99391635 | -0.1735141 | 0.24015994 | -0.7224939 | 0.46999087 | NA         |
| Dusp19      | 573.597525 | -0.1735291 | 0.21573885 | -0.804348  | 0.42119603 | 0.70099991 |

|             |            |            |            |            |            |            |
|-------------|------------|------------|------------|------------|------------|------------|
| Pnpla8      | 3165.67843 | -0.1735906 | 0.19574791 | -0.8868068 | 0.37518295 | 0.66497265 |
| Mrps27      | 4577.66862 | -0.1736547 | 0.18572724 | -0.9349988 | 0.34978894 | 0.64198366 |
| Gpt2        | 9744.43445 | -0.1736705 | 0.17300851 | -1.0038265 | 0.31546224 | 0.6098649  |
| Ctnnb1      | 59280.431  | -0.1736851 | 0.14376628 | -1.2081076 | 0.22700587 | 0.51714743 |
| Zfp146      | 2377.48838 | -0.1736901 | 0.16614682 | -1.0454012 | 0.29583756 | 0.59051371 |
| Zcchc7      | 2092.44548 | -0.1738035 | 0.22308761 | -0.7790817 | 0.43593162 | 0.70993534 |
| Mvp         | 3385.06639 | -0.1738297 | 0.25177564 | -0.6904151 | 0.48993316 | 0.75093147 |
| Ppp2ca      | 22126.9286 | -0.1738472 | 0.1607475  | -1.0814926 | 0.27947807 | 0.57200243 |
| Sfxn1       | 6626.77637 | -0.1738903 | 0.20649667 | -0.8420974 | 0.39973343 | 0.68491125 |
| Pigt        | 4370.19927 | -0.173931  | 0.1792237  | -0.9704688 | 0.33181285 | 0.62515407 |
| Lrrc34      | 4522.17297 | -0.1739324 | 0.24873289 | -0.6992738 | 0.48438095 | 0.74712338 |
| Wdr20       | 1240.68322 | -0.1739634 | 0.18826859 | -0.9240169 | 0.3554775  | 0.64710105 |
| D030028A08  | 117.339333 | -0.1739654 | 0.30038158 | -0.579148  | 0.56248932 | 0.79942162 |
| Mettl9      | 3153.9575  | -0.1741942 | 0.1777337  | -0.9800856 | 0.32704386 | 0.62039456 |
| Slc26a11    | 851.563621 | -0.1741962 | 0.28115598 | -0.6195713 | 0.53554009 | 0.7803571  |
| Ikzf4       | 80.2081511 | -0.1742192 | 0.35156919 | -0.4955473 | 0.62021383 | 0.83138912 |
| Osbpl10     | 1559.20133 | -0.1743079 | 0.22366889 | -0.7793124 | 0.43579571 | 0.70987111 |
| Atp6ap2     | 8159.45196 | -0.1743615 | 0.17289977 | -1.008454  | 0.31323658 | 0.60787966 |
| Smarca4     | 16859.2716 | -0.1744536 | 0.22766848 | -0.7662617 | 0.44352063 | 0.71689626 |
| Zfp772      | 482.909914 | -0.1746899 | 0.21958896 | -0.7955314 | 0.42630444 | 0.70402942 |
| Phb2        | 17232.222  | -0.1747604 | 0.20856308 | -0.837926  | 0.40207226 | 0.68675204 |
| Arcn1       | 19913.0506 | -0.1747728 | 0.25872602 | -0.675513  | 0.49934988 | 0.75708397 |
| Lig3        | 7770.26847 | -0.1747813 | 0.19214234 | -0.9096451 | 0.3630097  | 0.65337545 |
| Ctnnbip1    | 1337.14227 | -0.1747951 | 0.1739624  | -1.0047869 | 0.31499948 | 0.6093449  |
| Cep89       | 2273.2309  | -0.1749098 | 0.18355085 | -0.9529228 | 0.3406292  | 0.63407735 |
| Zfp830      | 2366.54013 | -0.174932  | 0.18144196 | -0.9641209 | 0.33498529 | 0.62800397 |
| 2700062C07f | 1275.4331  | -0.1750387 | 0.19836895 | -0.8823894 | 0.37756625 | 0.6672936  |
| Mettl3      | 2574.18158 | -0.1751223 | 0.16971235 | -1.0318772 | 0.30212964 | 0.59723123 |
| Ncoa2       | 4209.70679 | -0.1751635 | 0.24779945 | -0.7068762 | 0.4796434  | 0.74381078 |
| Esco1       | 3035.00083 | -0.1752127 | 0.20901523 | -0.8382774 | 0.40187494 | 0.68675204 |
| Ccdc142     | 237.335267 | -0.1752608 | 0.27115643 | -0.6463456 | 0.51805557 | 0.76808698 |
| Plgrkt      | 1173.03567 | -0.1754265 | 0.21626634 | -0.8111594 | 0.41727416 | 0.69868745 |
| Nsa2        | 8163.06372 | -0.1754863 | 0.18163808 | -0.9661318 | 0.33397822 | 0.62718213 |
| Lamb3       | 72.1408061 | -0.1755095 | 0.40973    | -0.428354  | 0.66839343 | 0.85987643 |
| Champ1      | 5270.45192 | -0.1755407 | 0.25161683 | -0.6976511 | 0.48539544 | 0.74773497 |
| Gm5640      | 0.70432104 | -0.1756715 | 0.20106397 | -0.8737093 | 0.38227657 | NA         |
| Hist1h2ad   | 0.70432104 | -0.1756715 | 0.20106397 | -0.8737093 | 0.38227657 | NA         |
| Cd248       | 32.5592028 | -0.1757208 | 0.41837571 | -0.4200072 | 0.67448021 | 0.86375836 |
| Fga         | 9.27844637 | -0.1757348 | 0.42460399 | -0.4138792 | 0.67896258 | 0.86604267 |
| Pex11a      | 199.902815 | -0.1757493 | 0.27186419 | -0.64646   | 0.5179815  | 0.76808698 |
| Mcm2        | 31274.9715 | -0.1757579 | 0.19260199 | -0.9125448 | 0.36148202 | 0.65221104 |

|             |            |            |            |            |            |            |
|-------------|------------|------------|------------|------------|------------|------------|
| Vps37c      | 769.030944 | -0.1757613 | 0.22246045 | -0.7900791 | 0.4294816  | 0.70541491 |
| Pik3c3      | 3272.67825 | -0.1758573 | 0.17840352 | -0.9857277 | 0.32426673 | 0.618534   |
| Csrnp2      | 1722.44897 | -0.1758692 | 0.24915411 | -0.7058652 | 0.48027195 | 0.74407463 |
| Idua        | 661.16778  | -0.1758873 | 0.23332428 | -0.7538319 | 0.45095019 | 0.7229937  |
| Alg8        | 974.179927 | -0.1758893 | 0.30500617 | -0.5766744 | 0.56415941 | 0.80062448 |
| Pttg1ip     | 7339.52739 | -0.1759058 | 0.18379143 | -0.9570948 | 0.33851943 | 0.63197066 |
| Rrp36       | 2409.73432 | -0.17596   | 0.18417855 | -0.9553771 | 0.33938705 | 0.63290658 |
| Gtpbp10     | 2325.08556 | -0.1761974 | 0.21407161 | -0.823077  | 0.41046422 | 0.69313511 |
| Rpl13a      | 114555.373 | -0.1762195 | 0.2473708  | -0.71237   | 0.47623568 | 0.74148389 |
| Abcf2       | 14700.0369 | -0.1763221 | 0.17196249 | -1.0253523 | 0.30519698 | 0.59971168 |
| Cog4        | 7891.33357 | -0.1763253 | 0.14950671 | -1.1793802 | 0.23824681 | 0.53019122 |
| Serpina1b   | 1.3597379  | -0.1763593 | 0.22669088 | -0.7779724 | 0.43658528 | NA         |
| Las1l       | 9614.03375 | -0.1764816 | 0.15304819 | -1.1531115 | 0.2488646  | 0.54210582 |
| Wdr70       | 3001.32139 | -0.1765104 | 0.21240789 | -0.8309973 | 0.40597517 | 0.68991262 |
| Cpsf7       | 5511.72199 | -0.1765351 | 0.21171765 | -0.8338231 | 0.40438066 | 0.68892678 |
| BC089597    | 10.7238804 | -0.1765778 | 0.42810868 | -0.4124602 | 0.68000212 | 0.86642486 |
| Cep97       | 1722.3697  | -0.1766251 | 0.21409223 | -0.8249955 | 0.40937414 | 0.69272876 |
| BC052040    | 2641.93382 | -0.1767185 | 0.19364249 | -0.9126019 | 0.36145196 | 0.65221104 |
| AI837181    | 1180.37525 | -0.1767844 | 0.19225077 | -0.9195513 | 0.35780731 | 0.64904484 |
| Ganc        | 383.218582 | -0.1768116 | 0.21177158 | -0.8349167 | 0.40376461 | 0.68810339 |
| Tsnaxip1    | 15.5970791 | -0.176822  | 0.42907314 | -0.4121023 | 0.68026445 | 0.86647494 |
| Tmem104     | 718.72689  | -0.1768226 | 0.2931332  | -0.6032157 | 0.54636518 | 0.78759037 |
| Sult2b1     | 166.712998 | -0.1768917 | 0.33621147 | -0.5261323 | 0.59879628 | 0.82005546 |
| Bcl2l2      | 1997.3688  | -0.1768951 | 0.25781853 | -0.6861227 | 0.49263575 | 0.75285423 |
| 9230112J17R | 1.69782473 | -0.1768978 | 0.2987433  | -0.5921398 | 0.55375698 | NA         |
| 2410004N09I | 1867.79446 | -0.1769482 | 0.24601076 | -0.71927   | 0.47197459 | 0.73859646 |
| Bach1       | 5220.32565 | -0.1769636 | 0.17293282 | -1.0233086 | 0.30616197 | 0.60046978 |
| Rgs14       | 43.536261  | -0.1770264 | 0.40016955 | -0.4423785 | 0.65821535 | 0.85363246 |
| Mettl4      | 1954.63106 | -0.1772069 | 0.19499549 | -0.9087742 | 0.36346931 | 0.65367309 |
| Trabd2b     | 2.36397156 | -0.177211  | 0.33069005 | -0.5358824 | 0.59203983 | NA         |
| Recql5      | 2106.99827 | -0.1772263 | 0.1963903  | -0.9024186 | 0.36683452 | 0.65698994 |
| Mir7674     | 3.19194595 | -0.1773019 | 0.34656289 | -0.5116009 | 0.60893034 | NA         |
| Fchsd1      | 410.401714 | -0.1773113 | 0.24947777 | -0.7107298 | 0.47725167 | 0.74223918 |
| Naa16       | 3824.15551 | -0.1773157 | 0.20096833 | -0.8823068 | 0.3776109  | 0.6672936  |
| Adrb2       | 250.074213 | -0.1773178 | 0.2331346  | -0.7605814 | 0.44690713 | 0.72034128 |
| Nolc1       | 23186.2224 | -0.1774335 | 0.22293706 | -0.7958904 | 0.42609576 | 0.70402942 |
| Ptprt0s     | 338.515384 | -0.1774909 | 0.38924264 | -0.4559904 | 0.64839691 | 0.84847024 |
| Surf2       | 2005.41579 | -0.1775232 | 0.16213082 | -1.0949378 | 0.27354391 | 0.56657339 |
| Ptbp1       | 39707.6112 | -0.1775938 | 0.20954646 | -0.8475149 | 0.39670817 | 0.68311652 |
| Gdap1       | 17.8082082 | -0.1776536 | 0.43213906 | -0.411103  | 0.68099704 | 0.86700223 |
| Abcf1       | 11918.8693 | -0.1776847 | 0.20129368 | -0.8827137 | 0.377391   | 0.66728175 |

|             |            |            |            |            |            |            |
|-------------|------------|------------|------------|------------|------------|------------|
| Ndufb11     | 5918.94236 | -0.1776994 | 0.20182904 | -0.8804451 | 0.37861826 | 0.66771292 |
| Gars        | 30984.4428 | -0.1777447 | 0.1683411  | -1.0558603 | 0.29103203 | 0.58476633 |
| Ifitm2      | 15164.5814 | -0.1778026 | 0.24428178 | -0.7278586 | 0.46670015 | 0.73543831 |
| Trmt61a     | 1636.39571 | -0.1779534 | 0.20706284 | -0.8594172 | 0.39011038 | 0.67839532 |
| Hnmt        | 2.7636383  | -0.1780104 | 0.22708627 | -0.7838889 | 0.43310529 | NA         |
| Btnl6       | 1.45048343 | -0.1781052 | 0.26152833 | -0.6810167 | 0.49586091 | NA         |
| Akap17b     | 1162.75555 | -0.1781079 | 0.21993794 | -0.8098097 | 0.41804955 | 0.69896008 |
| Ctu1        | 823.666107 | -0.1781266 | 0.19408591 | -0.9177719 | 0.35873827 | 0.64978295 |
| Fpgs        | 5231.11572 | -0.1782128 | 0.19440358 | -0.9167154 | 0.35929177 | 0.65018613 |
| Trmt1       | 6234.29799 | -0.1782206 | 0.21132493 | -0.8433486 | 0.39903349 | 0.68473712 |
| Tceb3       | 3876.9521  | -0.1782381 | 0.18850591 | -0.9455306 | 0.34438805 | 0.63755825 |
| Vmn2r-ps54  | 2.26446552 | -0.1782405 | 0.34247785 | -0.5204437 | 0.60275433 | NA         |
| Slc9a5      | 408.431588 | -0.1783408 | 0.25039173 | -0.7122474 | 0.47631162 | 0.74152787 |
| Rbm27       | 7741.6654  | -0.1788006 | 0.2305336  | -0.7755947 | 0.43798834 | 0.7119144  |
| Hist1h4k    | 3.64707057 | -0.1788115 | 0.38603924 | -0.4631952 | 0.64322445 | NA         |
| Ndst2       | 568.484055 | -0.1788174 | 0.22490641 | -0.7950749 | 0.42656995 | 0.70402942 |
| Id1         | 112.125972 | -0.1788184 | 0.3223387  | -0.554753  | 0.5790636  | 0.80813229 |
| Npr2        | 85.3147333 | -0.1788232 | 0.36435481 | -0.490794  | 0.62357213 | 0.83265488 |
| Ago2        | 9808.96667 | -0.1789281 | 0.33893762 | -0.5279085 | 0.59756283 | 0.81967888 |
| Fnbp1       | 4028.00872 | -0.1789859 | 0.18595133 | -0.9625417 | 0.33577757 | 0.62836064 |
| Prss21      | 0.72364922 | -0.1789872 | 0.20275041 | -0.8827959 | 0.37734657 | NA         |
| Aadacl3     | 2.29174919 | -0.1791547 | 0.28582709 | -0.6267939 | 0.53079437 | NA         |
| Npsr1       | 3.1994059  | -0.1792176 | 0.30615847 | -0.5853751 | 0.55829551 | NA         |
| Cbln3       | 17.1576325 | -0.1792848 | 0.43172983 | -0.4152709 | 0.67794361 | 0.86555439 |
| Tead2       | 9628.00739 | -0.1793709 | 0.19327108 | -0.9280796 | 0.35336627 | 0.6449764  |
| Rab3gap1    | 3241.34894 | -0.1794474 | 0.16575609 | -1.0825992 | 0.27898635 | 0.5713085  |
| Hectd3      | 1957.59961 | -0.1794866 | 0.2007814  | -0.8939402 | 0.37135387 | 0.66164325 |
| Drap1       | 3964.79457 | -0.1797337 | 0.19577184 | -0.9180776 | 0.35857825 | 0.64968546 |
| Tnk2os      | 2.39667801 | -0.1797843 | 0.2940879  | -0.6113285 | 0.54098211 | NA         |
| Anxa11      | 4663.61564 | -0.1799019 | 0.19048867 | -0.9444232 | 0.34495341 | 0.63773152 |
| Ctu2        | 2182.12323 | -0.1799784 | 0.18986657 | -0.9479202 | 0.34317006 | 0.63670595 |
| Gm3604      | 1608.02754 | -0.1800124 | 0.28839876 | -0.6241787 | 0.53251021 | 0.7787064  |
| Dgkd        | 5694.15922 | -0.1801189 | 0.23046146 | -0.7815575 | 0.43447469 | 0.70860901 |
| Ptges3      | 23385.1321 | -0.1801837 | 0.17805855 | -1.0119349 | 0.31156916 | 0.60623388 |
| Gpr19       | 1261.91537 | -0.1802396 | 0.21841101 | -0.8252312 | 0.40924037 | 0.69272416 |
| Clasrp      | 2643.4584  | -0.1802729 | 0.17961492 | -1.0036635 | 0.31554082 | 0.60989929 |
| Smyd5       | 6591.16484 | -0.1803108 | 0.18369806 | -0.9815609 | 0.32631621 | 0.61957682 |
| 1700052N19I | 3671.304   | -0.1803159 | 0.15792627 | -1.1417727 | 0.25354852 | 0.54626394 |
| Csde1       | 33899.2801 | -0.1804062 | 0.16018501 | -1.1262366 | 0.26006539 | 0.55222808 |
| Arhgef15    | 526.839052 | -0.1804523 | 0.28208699 | -0.6397045 | 0.52236472 | 0.77084692 |
| Tns3        | 11165.4668 | -0.1804808 | 0.29826401 | -0.6051042 | 0.54510979 | 0.78658275 |

|          |            |            |            |            |            |            |
|----------|------------|------------|------------|------------|------------|------------|
| Cers2    | 4471.5538  | -0.1805686 | 0.22464268 | -0.8038035 | 0.42151049 | 0.70108061 |
| Gm6559   | 4.00513848 | -0.1806684 | 0.37984504 | -0.4756372 | 0.63433289 | NA         |
| Ttc28    | 1883.13577 | -0.180719  | 0.32402754 | -0.5577273 | 0.57703059 | 0.80734073 |
| Lztf1    | 1446.47745 | -0.1807849 | 0.19792951 | -0.91338   | 0.36104271 | 0.65183221 |
| Csnk1g2  | 6282.02105 | -0.1807894 | 0.18402664 | -0.9824088 | 0.32589852 | 0.61926293 |
| Mcm7     | 30982.6475 | -0.1807951 | 0.17832549 | -1.0138489 | 0.31065486 | 0.60523599 |
| Casp9    | 3092.43936 | -0.1808059 | 0.17658454 | -1.0239056 | 0.30587988 | 0.60014357 |
| Polr3f   | 3254.99113 | -0.180809  | 0.20485737 | -0.8826092 | 0.37744744 | 0.66728175 |
| Lmtk2    | 4811.03972 | -0.1808372 | 0.224993   | -0.803746  | 0.4215437  | 0.70108061 |
| Pfkfb4   | 316.342741 | -0.1809135 | 0.29352945 | -0.6163384 | 0.5376712  | 0.7813592  |
| Pvt1     | 721.202422 | -0.1809136 | 0.19101548 | -0.9471149 | 0.34358021 | 0.63690736 |
| Bnip1    | 813.676153 | -0.1811063 | 0.19897537 | -0.9101947 | 0.36271982 | 0.65337545 |
| Setd8    | 7415.38403 | -0.1811223 | 0.21103104 | -0.8582734 | 0.3907415  | 0.67903559 |
| Ceacam18 | 9.69465538 | -0.1812064 | 0.43159977 | -0.4198482 | 0.67459637 | 0.8637833  |
| Matn2    | 94.688532  | -0.1813177 | 0.29368764 | -0.6173827 | 0.53698233 | 0.78108804 |
| Mettl18  | 1154.65694 | -0.1813638 | 0.19388383 | -0.935425  | 0.34956933 | 0.64196418 |
| Cyld     | 1884.50437 | -0.1814332 | 0.20707631 | -0.8761659 | 0.38093984 | 0.66990789 |
| Zfp426   | 1286.92051 | -0.1816342 | 0.170699   | -1.0640612 | 0.28730099 | 0.58077783 |
| Hmg20b   | 2523.36572 | -0.1816408 | 0.20231763 | -0.8978004 | 0.36929199 | 0.65967648 |
| Ccdc12   | 1589.86928 | -0.1816417 | 0.20975124 | -0.8659862 | 0.38649773 | 0.67532879 |
| Rybp     | 4542.59138 | -0.1816439 | 0.2247959  | -0.8080394 | 0.41906791 | 0.69973018 |
| Gm6890   | 1.0159976  | -0.1817486 | 0.24413812 | -0.7444498 | 0.45660439 | NA         |
| Cldn23   | 1.0159976  | -0.1817486 | 0.24413812 | -0.7444498 | 0.45660439 | NA         |
| Grid1    | 117.306702 | -0.1817839 | 0.41909689 | -0.4337514 | 0.66446898 | 0.85719825 |
| Nbeal1   | 2153.32317 | -0.1818239 | 0.30211209 | -0.6018424 | 0.54727905 | 0.78821846 |
| Gm11992  | 51.4035045 | -0.1819267 | 0.35550659 | -0.5117393 | 0.60883347 | 0.82562526 |
| Ccdc147  | 2.89371404 | -0.1820415 | 0.33091989 | -0.5501075 | 0.58224565 | NA         |
| Prdx2    | 17432.3291 | -0.1820559 | 0.21153185 | -0.860655  | 0.38942808 | 0.67794934 |
| Anxa4    | 4621.84116 | -0.182069  | 0.26528635 | -0.6863111 | 0.49251692 | 0.7528141  |
| Glb1     | 10476.6101 | -0.1822098 | 0.25558738 | -0.7129059 | 0.47590399 | 0.74133857 |
| Sipa1l3  | 3110.84266 | -0.1822574 | 0.24546749 | -0.7424911 | 0.45778985 | 0.72851923 |
| Rpf1     | 5216.50426 | -0.1823116 | 0.1562769  | -1.1665931 | 0.24337472 | 0.53577799 |
| Ppip5k2  | 6228.32995 | -0.1824298 | 0.23368898 | -0.7806519 | 0.43500724 | 0.70924697 |
| Cacna2d1 | 386.502293 | -0.1825285 | 0.36547142 | -0.4994331 | 0.61747432 | 0.83032065 |
| Pafah1b2 | 5639.03797 | -0.1826584 | 0.16169902 | -1.1296195 | 0.2586366  | 0.55112352 |
| Rasal2   | 1836.05934 | -0.1826641 | 0.20745419 | -0.8805035 | 0.37858664 | 0.66771292 |
| Vmn2r90  | 2.28536736 | -0.1826741 | 0.22082805 | -0.8272233 | 0.40811051 | NA         |
| Slc26a4  | 6.02365259 | -0.1828032 | 0.41215393 | -0.4435314 | 0.6573814  | 0.85307902 |
| Uhrf1    | 45395.3564 | -0.1828307 | 0.1666058  | -1.0973852 | 0.27247305 | 0.56572838 |
| Picalm   | 15240.0234 | -0.1828567 | 0.15664964 | -1.1672971 | 0.24309039 | 0.5356048  |
| Ap3m1    | 5243.96073 | -0.182972  | 0.17539134 | -1.0432217 | 0.29684563 | 0.59122008 |

|             |            |            |            |            |            |            |
|-------------|------------|------------|------------|------------|------------|------------|
| Man2a2      | 1680.01646 | -0.1829966 | 0.22304883 | -0.8204329 | 0.41196937 | 0.69453398 |
| Lsm12       | 3735.17965 | -0.1832043 | 0.18393264 | -0.9960403 | 0.31923057 | 0.61303091 |
| Mcm3        | 38256.2095 | -0.1832188 | 0.17744112 | -1.032561  | 0.30180937 | 0.59697807 |
| Serpinc1    | 42.1394473 | -0.1832871 | 0.4121407  | -0.4447198 | 0.65652224 | 0.85271673 |
| Utp6        | 12650.6924 | -0.1834463 | 0.19497805 | -0.9408563 | 0.34677851 | 0.63902745 |
| Hrsp12      | 1947.87507 | -0.1836483 | 0.20681105 | -0.8880005 | 0.37454047 | 0.66421244 |
| Rint1       | 1339.30927 | -0.1837004 | 0.22877401 | -0.8029776 | 0.42198768 | 0.70127884 |
| Slitrk4     | 3.73088086 | -0.1838046 | 0.3813774  | -0.4819494 | 0.62984187 | NA         |
| Dlst        | 7886.68314 | -0.183806  | 0.14184217 | -1.2958487 | 0.19502761 | 0.47791907 |
| Sfn10-ps    | 185.484174 | -0.183887  | 0.41357202 | -0.4446313 | 0.65658625 | 0.85272865 |
| Msh3        | 3539.99189 | -0.1839114 | 0.19240136 | -0.9558737 | 0.33913605 | 0.63270101 |
| Zc3h12c     | 533.628701 | -0.1839544 | 0.31355683 | -0.5866701 | 0.55742528 | 0.7960074  |
| Msantd4     | 4263.44679 | -0.1839612 | 0.16694066 | -1.1019553 | 0.27048109 | 0.5637571  |
| Stxbp5      | 588.415864 | -0.1839645 | 0.28042744 | -0.6560146 | 0.5118147  | 0.76528308 |
| Rnf4        | 22939.0701 | -0.18403   | 0.14152963 | -1.3002931 | 0.19350054 | 0.47612768 |
| Cnpy3       | 3595.83522 | -0.1841256 | 0.18828747 | -0.977896  | 0.32812574 | 0.6217477  |
| Espn        | 235.879361 | -0.1841353 | 0.2455246  | -0.749967  | 0.45327458 | 0.72431158 |
| Tmem134     | 1510.00682 | -0.184187  | 0.22374404 | -0.8232042 | 0.41039186 | 0.69309338 |
| Pibf1       | 1480.60998 | -0.1842168 | 0.1787494  | -1.0305868 | 0.30273464 | 0.59790613 |
| Jmjd8       | 713.901197 | -0.1842649 | 0.23058542 | -0.7991176 | 0.42422223 | 0.70280233 |
| Cbln2       | 3.34858703 | -0.1842722 | 0.30170696 | -0.6107656 | 0.54135474 | NA         |
| Zfp811      | 848.35686  | -0.1842913 | 0.19019897 | -0.9689397 | 0.33257529 | 0.62583232 |
| Ar          | 4.29864059 | -0.1842958 | 0.39277212 | -0.4692182 | 0.63891368 | NA         |
| Cpsf2       | 9585.43435 | -0.1843033 | 0.176515   | -1.0441227 | 0.29642862 | 0.59122008 |
| Rad50       | 6317.3951  | -0.1843237 | 0.21276919 | -0.8663082 | 0.38632117 | 0.6752479  |
| Ankrd11     | 16784.603  | -0.1843279 | 0.29147564 | -0.6323957 | 0.52712837 | 0.77457935 |
| Eed         | 14869.5209 | -0.1843327 | 0.16129561 | -1.142825  | 0.25311124 | 0.54607863 |
| 3300002I08R | 45.5657956 | -0.1843602 | 0.35711045 | -0.5162553 | 0.60567608 | 0.82418428 |
| Usp39       | 6764.34778 | -0.1844867 | 0.15929312 | -1.1581588 | 0.24679924 | 0.53964777 |
| Itgb1       | 20419.7945 | -0.1845522 | 0.21104597 | -0.8744646 | 0.38186526 | 0.67077677 |
| Nek8        | 1046.80298 | -0.1845608 | 0.26244033 | -0.7032487 | 0.4819008  | 0.74500838 |
| Srd5a1      | 556.572024 | -0.1845846 | 0.2359973  | -0.782147  | 0.43412817 | 0.70858066 |
| Gm9079      | 48.7326788 | -0.1846108 | 0.37028989 | -0.4985576 | 0.61809107 | 0.83039356 |
| Dscr3       | 4039.2173  | -0.1846262 | 0.18291    | -1.0093828 | 0.31279107 | 0.60734349 |
| C77080      | 8734.83795 | -0.1846422 | 0.25255345 | -0.7311014 | 0.46471721 | 0.73405965 |
| Ccdc153     | 2.0027966  | -0.1846765 | 0.27914115 | -0.6615884 | 0.50823507 | NA         |
| Polr1c      | 8064.21565 | -0.1847631 | 0.18460915 | -1.0008338 | 0.31690718 | 0.611518   |
| Pfkfb1      | 880.4437   | -0.1847722 | 0.27328896 | -0.6761057 | 0.49897355 | 0.75696826 |
| Athl1       | 1335.65239 | -0.1848336 | 0.25511953 | -0.7244981 | 0.46876    | 0.73662962 |
| 2510009E07F | 1339.8004  | -0.1848485 | 0.36335717 | -0.5087239 | 0.6109458  | 0.82651745 |
| Alg10b      | 3326.72569 | -0.1849489 | 0.28564656 | -0.6474745 | 0.5173249  | 0.76797266 |

|             |            |            |            |            |            |            |
|-------------|------------|------------|------------|------------|------------|------------|
| Scrib       | 6551.41841 | -0.1849602 | 0.20039112 | -0.9229961 | 0.35600924 | 0.64764054 |
| Stk40       | 3145.07254 | -0.1850418 | 0.20510585 | -0.9021773 | 0.36696269 | 0.6571438  |
| Nhlrc2      | 2576.12525 | -0.1851498 | 0.17983355 | -1.0295622 | 0.30321557 | 0.59849162 |
| Decr1       | 1216.24151 | -0.185317  | 0.25561148 | -0.7249949 | 0.46845515 | 0.73622497 |
| Ugcg        | 5596.24558 | -0.1853203 | 0.1826578  | -1.0145762 | 0.31030788 | 0.60486516 |
| Lsg1        | 7290.57437 | -0.1853652 | 0.16654946 | -1.1129737 | 0.26571973 | 0.55776375 |
| Afg3l1      | 6415.54215 | -0.1853872 | 0.1734042  | -1.0691042 | 0.28502273 | 0.57788637 |
| Bbs10       | 498.086477 | -0.1854188 | 0.21542262 | -0.860721  | 0.38939173 | 0.67794934 |
| Creb1       | 3951.00242 | -0.185549  | 0.19583351 | -0.9474835 | 0.34339244 | 0.63671108 |
| Barx2       | 5.39034615 | -0.1856667 | 0.37312022 | -0.4976057 | 0.618762   | NA         |
| Tmem66      | 2515.34005 | -0.1858372 | 0.20877295 | -0.8901401 | 0.37339068 | 0.66321123 |
| Htr4        | 2.41613439 | -0.185864  | 0.32448523 | -0.5727965 | 0.56678247 | NA         |
| Rp9         | 2089.37283 | -0.1859072 | 0.18059215 | -1.0294314 | 0.303277   | 0.59849162 |
| E030044B06F | 4.81198464 | -0.1859352 | 0.35498909 | -0.5237773 | 0.60043345 | NA         |
| Creld1      | 1833.24662 | -0.1860966 | 0.19728997 | -0.9432644 | 0.34554571 | 0.63779826 |
| Gm12070     | 234.599339 | -0.1862581 | 0.25301591 | -0.7361518 | 0.46163831 | 0.73179789 |
| Eci2        | 2840.98065 | -0.1863376 | 0.20226321 | -0.9212628 | 0.35691325 | 0.64802778 |
| Lrrc55      | 1.07673522 | -0.1863421 | 0.24443493 | -0.7623384 | 0.44585806 | NA         |
| Trim34b     | 51.5754145 | -0.186396  | 0.42857485 | -0.4349205 | 0.66362013 | 0.85671232 |
| Mgea5       | 15216.3866 | -0.1865486 | 0.20040058 | -0.9308784 | 0.35191646 | 0.64414464 |
| Nfxl1       | 2651.80444 | -0.186588  | 0.18531638 | -1.0068621 | 0.31400105 | 0.60841899 |
| Pcdhb22     | 8.39570125 | -0.1866033 | 0.42734391 | -0.4366584 | 0.66235914 | 0.85619416 |
| Slc22a4     | 3.86442737 | -0.1867443 | 0.3368846  | -0.5543273 | 0.57935484 | NA         |
| Rexo4       | 3315.06467 | -0.1867987 | 0.15948632 | -1.1712519 | 0.24149753 | 0.53406259 |
| Lsm7        | 1899.21666 | -0.1870559 | 0.21433162 | -0.8727405 | 0.38280454 | 0.6718196  |
| Ide         | 17494.2048 | -0.1870825 | 0.16295237 | -1.1480811 | 0.25093507 | 0.54455641 |
| Prss38      | 102.100829 | -0.1870996 | 0.36608338 | -0.5110845 | 0.60929186 | 0.82590648 |
| Txn2        | 6606.33012 | -0.1871321 | 0.19774306 | -0.9463395 | 0.34397543 | 0.63732661 |
| Nps         | 2.7455632  | -0.1871676 | 0.29639945 | -0.6314707 | 0.52773278 | NA         |
| Ahcy        | 5032.10378 | -0.1871725 | 0.1790549  | -1.045336  | 0.29586772 | 0.59051371 |
| Rfxap       | 712.086885 | -0.1871895 | 0.23874049 | -0.784071  | 0.43299845 | 0.70818326 |
| Slc19a1     | 1062.05927 | -0.1872825 | 0.17939654 | -1.0439581 | 0.29650476 | 0.59122008 |
| Trim32      | 1590.85737 | -0.1873107 | 0.16382679 | -1.1433461 | 0.25289494 | 0.54598821 |
| Lamp3       | 14.0432784 | -0.1873686 | 0.42944082 | -0.4363082 | 0.66261312 | 0.85619416 |
| Tjap1       | 3315.23911 | -0.187531  | 0.22156218 | -0.8464033 | 0.3973278  | 0.68347116 |
| Kdelr1      | 4819.38917 | -0.1875428 | 0.17628353 | -1.0638701 | 0.28738757 | 0.58086354 |
| Snora17     | 36.9391093 | -0.1875529 | 0.39300748 | -0.4772248 | 0.63320205 | 0.83875001 |
| Relb        | 2094.95353 | -0.1877497 | 0.23991602 | -0.7825644 | 0.43388296 | 0.70858066 |
| Ccdc151     | 154.677704 | -0.1877873 | 0.29029831 | -0.6468771 | 0.51771148 | 0.76807205 |
| Hpgds       | 3.89963042 | -0.187837  | 0.39318971 | -0.4777261 | 0.63284513 | NA         |
| lws1        | 7245.42673 | -0.187868  | 0.19075656 | -0.9848576 | 0.32469404 | 0.61878886 |



|             |            |            |            |            |            |            |
|-------------|------------|------------|------------|------------|------------|------------|
| Cmah        | 1.55741055 | -0.1878972 | 0.2687236  | -0.6992209 | 0.48441397 | NA         |
| Npr3        | 928.982441 | -0.1880094 | 0.34380268 | -0.5468528 | 0.58447988 | 0.81153987 |
| Pomt1       | 2057.65169 | -0.1882511 | 0.18484356 | -1.0184347 | 0.30847141 | 0.60292433 |
| Bzrap1      | 51.699416  | -0.1882777 | 0.39321427 | -0.4788169 | 0.63206886 | 0.83803418 |
| Slc36a1os   | 2.11249293 | -0.1884484 | 0.3103567  | -0.6071995 | 0.54371854 | NA         |
| 9530026P05F | 11.9565811 | -0.1884609 | 0.43073214 | -0.4375362 | 0.66172252 | 0.85575442 |
| Nadk        | 9265.19145 | -0.1885271 | 0.14579599 | -1.2930885 | 0.19598047 | 0.47904626 |
| Oscar       | 19.9666156 | -0.1885276 | 0.4214895  | -0.4472889 | 0.65466645 | 0.85212302 |
| Tomm34      | 5212.74292 | -0.1885636 | 0.17358534 | -1.0862875 | 0.27735182 | 0.56958658 |
| St8sia2     | 16.8718399 | -0.188598  | 0.42960541 | -0.4390028 | 0.66065953 | 0.8552332  |
| S100g       | 16.5555814 | -0.1886274 | 0.35649415 | -0.5291177 | 0.59672377 | 0.81955304 |
| Wdr61       | 6742.41461 | -0.1886843 | 0.16874779 | -1.118144  | 0.26350552 | 0.55541671 |
| Rbbp8nl     | 1.99619669 | -0.1886898 | 0.31544522 | -0.5981699 | 0.54972658 | NA         |
| Gm19583     | 12.9653249 | -0.1887264 | 0.43226473 | -0.4365992 | 0.66240203 | 0.85619416 |
| Fopnl       | 2621.16817 | -0.1887529 | 0.18043542 | -1.0460968 | 0.29551635 | 0.59015984 |
| Mphosph8    | 14417.3078 | -0.188837  | 0.17884877 | -1.0558471 | 0.29103807 | 0.58476633 |
| Tekt1       | 725.06858  | -0.1888887 | 0.43054063 | -0.4387244 | 0.66086124 | 0.85535191 |
| Cenpl       | 1711.9396  | -0.188898  | 0.16727783 | -1.1292469 | 0.2587937  | 0.55112352 |
| Nfil3       | 393.016262 | -0.1889103 | 0.28703015 | -0.6581549 | 0.51043858 | 0.76464545 |
| Pop4        | 1881.89168 | -0.1889724 | 0.21202621 | -0.8912692 | 0.37278475 | 0.66269681 |
| Upk3bl      | 46.761819  | -0.1889957 | 0.41395109 | -0.4565654 | 0.64798346 | 0.84807194 |
| Dpy19l3     | 930.392842 | -0.189109  | 0.27459368 | -0.6886866 | 0.49102051 | 0.75185702 |
| Gapdh       | 89106.7071 | -0.1892007 | 0.19411887 | -0.9746639 | 0.32972698 | 0.62303576 |
| Exosc3      | 2112.61934 | -0.1892052 | 0.17696414 | -1.0691726 | 0.28499191 | 0.57788637 |
| Rdh8        | 1.02277596 | -0.189291  | 0.24489597 | -0.7729445 | 0.43955525 | NA         |
| Krt5        | 3.2450036  | -0.1893565 | 0.33774027 | -0.5606572 | 0.57503122 | NA         |
| Esyt3       | 744.325264 | -0.1894792 | 0.19633994 | -0.9650567 | 0.33451641 | 0.62758652 |
| Il17rc      | 444.474035 | -0.1895231 | 0.23952954 | -0.7912307 | 0.42880937 | 0.7048133  |
| Sap30       | 5497.04494 | -0.1895387 | 0.16063477 | -1.1799356 | 0.23802585 | 0.53000285 |
| Umodl1      | 4.61846431 | -0.1897411 | 0.40416011 | -0.46947   | 0.63873371 | NA         |
| Sirt5       | 259.228417 | -0.1897598 | 0.28533216 | -0.6650487 | 0.50601932 | 0.76151896 |
| Zfp563      | 650.976489 | -0.189765  | 0.19860312 | -0.9554984 | 0.33932571 | 0.63286809 |
| Tbc1d16     | 1360.45818 | -0.189802  | 0.19857997 | -0.9557962 | 0.33917523 | 0.63270101 |
| Ndufs1      | 12808.9024 | -0.1898344 | 0.16442976 | -1.1545014 | 0.24829467 | 0.54162653 |
| Zbed5       | 1034.81974 | -0.1898413 | 0.19490605 | -0.9740143 | 0.33004944 | 0.62344049 |
| Slc16a5     | 257.822847 | -0.1898703 | 0.21222255 | -0.8946756 | 0.37096051 | 0.6613329  |
| Kif3c       | 934.874983 | -0.189881  | 0.22653509 | -0.838197  | 0.40192006 | 0.68675204 |
| Clint1      | 6076.10517 | -0.1898882 | 0.21422972 | -0.8863767 | 0.37541456 | 0.66530733 |
| Krit1       | 3672.70506 | -0.1899696 | 0.20479639 | -0.9276023 | 0.35361392 | 0.64520848 |
| Hist1h4j    | 1.75140661 | -0.1900269 | 0.30145562 | -0.6303643 | 0.52845626 | NA         |
| Pitpnb      | 8121.21916 | -0.1901544 | 0.16219139 | -1.1724074 | 0.24103353 | 0.53349166 |

|             |            |            |            |            |            |            |
|-------------|------------|------------|------------|------------|------------|------------|
| Pwwp2a      | 3829.80011 | -0.1901817 | 0.1662932  | -1.1436529 | 0.2527676  | 0.54598821 |
| Tmem232     | 1.95278895 | -0.1906457 | 0.33162396 | -0.5748852 | 0.56536891 | NA         |
| Rdx         | 16593.8961 | -0.1906512 | 0.19706219 | -0.9674672 | 0.33331055 | 0.62653359 |
| Chchd5      | 2365.94793 | -0.1906888 | 0.19311541 | -0.9874342 | 0.3234298  | 0.61804582 |
| Rpl28       | 26658.4599 | -0.1907359 | 0.19791623 | -0.9637204 | 0.33518611 | 0.62800397 |
| Gabarap     | 6026.56923 | -0.1907604 | 0.2454449  | -0.7772027 | 0.43703921 | 0.71102725 |
| Srpk1       | 10063.5902 | -0.1907621 | 0.15004835 | -1.2713378 | 0.20360852 | 0.48825228 |
| Lrpprc      | 12630.2012 | -0.1909689 | 0.19488482 | -0.9799063 | 0.32713236 | 0.62039456 |
| Arl3        | 3021.96885 | -0.1910189 | 0.24150884 | -0.7909394 | 0.42897935 | 0.7048133  |
| Atg4c       | 875.949129 | -0.1910213 | 0.21119327 | -0.9044855 | 0.36573802 | 0.6560083  |
| Sall4       | 13871.4356 | -0.1911378 | 0.24159926 | -0.7911357 | 0.42886479 | 0.7048133  |
| Hist1h4f    | 5.34658938 | -0.1912393 | 0.38981236 | -0.4905931 | 0.62371427 | NA         |
| Ankrd17     | 14804.8758 | -0.191249  | 0.21448333 | -0.8916732 | 0.3725681  | 0.66269681 |
| Sec11a      | 6088.90934 | -0.191315  | 0.23942473 | -0.7990612 | 0.42425492 | 0.70280233 |
| Zbtb14      | 1157.34071 | -0.191335  | 0.19861961 | -0.9633238 | 0.33538505 | 0.62800397 |
| L3mbtl2     | 10771.0698 | -0.1914045 | 0.24019269 | -0.796879  | 0.4255213  | 0.70377154 |
| LOC106740   | 537.093758 | -0.1914934 | 0.26289238 | -0.72841   | 0.46636267 | 0.7350163  |
| 2610301B20F | 1714.72802 | -0.1915148 | 0.16905325 | -1.1328665 | 0.25727034 | 0.55006377 |
| Pex3        | 3235.55413 | -0.1915426 | 0.21179726 | -0.9043678 | 0.3658004  | 0.65604452 |
| Txndc17     | 8245.46486 | -0.1915736 | 0.20506225 | -0.9342214 | 0.35018967 | 0.64204193 |
| Emg1        | 10415.9223 | -0.1916065 | 0.17808781 | -1.07591   | 0.28196749 | 0.5743878  |
| Snora28     | 119.439598 | -0.1916166 | 0.33864013 | -0.5658414 | 0.57150162 | 0.80538015 |
| Kat8        | 2167.15158 | -0.1916656 | 0.17965267 | -1.0668677 | 0.28603159 | 0.57916346 |
| Wwox        | 760.665874 | -0.1917542 | 0.31713476 | -0.6046457 | 0.54541445 | 0.78666331 |
| Srgap3      | 721.135119 | -0.191793  | 0.29510208 | -0.6499209 | 0.51574331 | 0.76698137 |
| Slc41a3     | 343.749501 | -0.1918738 | 0.28723706 | -0.667998  | 0.50413489 | 0.76026005 |
| D7Ertd143e  | 2503.82356 | -0.192063  | 0.34731905 | -0.5529871 | 0.58027221 | 0.80858541 |
| Fam172a     | 1349.90269 | -0.1920825 | 0.22207316 | -0.8649515 | 0.38706541 | 0.67601687 |
| Patl1       | 5307.94682 | -0.1922473 | 0.222776   | -0.8629622 | 0.38815824 | 0.67731697 |
| Cttnbp2nl   | 1659.21962 | -0.1922679 | 0.21651175 | -0.8880252 | 0.37452718 | 0.66421244 |
| Polrmt      | 2294.70207 | -0.1923311 | 0.21835156 | -0.8808321 | 0.3784087  | 0.66771292 |
| Dhrs7       | 726.350602 | -0.1923463 | 0.43185533 | -0.4453952 | 0.65603416 | 0.85271673 |
| Poc5        | 1839.26347 | -0.1923737 | 0.15374054 | -1.2512877 | 0.21082954 | 0.49778092 |
| Faf1        | 11214.5289 | -0.1925285 | 0.15774173 | -1.22053   | 0.22226401 | 0.51090346 |
| Ccdc112     | 1101.4577  | -0.1926614 | 0.26530437 | -0.7261902 | 0.46772215 | 0.735927   |
| Crebl2      | 708.774814 | -0.1926734 | 0.22851875 | -0.8431404 | 0.39914995 | 0.6847754  |
| Rps23       | 39569.5195 | -0.1927142 | 0.19550074 | -0.9857469 | 0.32425732 | 0.618534   |
| Tubb5       | 113239.981 | -0.1927728 | 0.20063459 | -0.9608152 | 0.3366451  | 0.62930255 |
| Ppp1r8      | 7426.57315 | -0.1929776 | 0.16719968 | -1.1541746 | 0.24842858 | 0.5418391  |
| 1700016K19F | 46.5092043 | -0.1930148 | 0.41703428 | -0.4628272 | 0.64348826 | 0.84496208 |
| Pgam1       | 6450.08165 | -0.1930525 | 0.24315695 | -0.7939421 | 0.42722914 | 0.70423083 |

|             |            |            |            |            |            |            |
|-------------|------------|------------|------------|------------|------------|------------|
| Gpr25       | 3.42069207 | -0.1930737 | 0.29759988 | -0.6487695 | 0.51648737 | NA         |
| Ranbp10     | 3002.97569 | -0.1931653 | 0.27048391 | -0.7141471 | 0.4751362  | 0.74066189 |
| Cpeb2       | 352.406887 | -0.1932556 | 0.37277754 | -0.5184208 | 0.60416471 | 0.82299978 |
| Slc9a6      | 1656.10324 | -0.1933122 | 0.19266626 | -1.0033525 | 0.31569083 | 0.6100793  |
| Dhfr        | 6925.90333 | -0.1933349 | 0.1782074  | -1.0848868 | 0.27797178 | 0.57035746 |
| Lhfp12      | 1172.2583  | -0.1933498 | 0.30649333 | -0.6308451 | 0.52814178 | 0.77548229 |
| Crisp3      | 6.15844789 | -0.1934184 | 0.41194912 | -0.4695202 | 0.63869788 | 0.84194208 |
| Trappc6b    | 2233.82723 | -0.1934963 | 0.16280804 | -1.1884936 | 0.23463901 | 0.5263048  |
| Srsf6       | 28188.3392 | -0.1935705 | 0.18144974 | -1.0667997 | 0.28606228 | 0.57916346 |
| Aimp1       | 7806.75469 | -0.1936491 | 0.18581377 | -1.0421675 | 0.29733402 | 0.59166236 |
| 9930012K11F | 230.525975 | -0.1936589 | 0.37455797 | -0.5170333 | 0.60513292 | 0.82379634 |
| Zfp617      | 802.11739  | -0.1936743 | 0.26303454 | -0.7363076 | 0.46154349 | 0.73179789 |
| Hydin       | 676.850917 | -0.1937082 | 0.29150749 | -0.6645049 | 0.50636719 | 0.7617875  |
| Aco1        | 6370.84488 | -0.1937386 | 0.16299836 | -1.1885926 | 0.23460002 | 0.5263048  |
| Enox2       | 959.178268 | -0.1937908 | 0.19026584 | -1.0185268 | 0.30842768 | 0.60292433 |
| Pecam1      | 14505.8934 | -0.1937976 | 0.19498143 | -0.9939286 | 0.32025763 | 0.61412854 |
| Zp3r        | 15.7753145 | -0.1939847 | 0.40522321 | -0.4787108 | 0.63214435 | 0.83806282 |
| Zfp868      | 2265.01036 | -0.1940179 | 0.23432026 | -0.8280029 | 0.40766884 | 0.69149849 |
| Mier1       | 5826.24962 | -0.1941071 | 0.19216656 | -1.0100983 | 0.31244821 | 0.60690508 |
| Nelfb       | 4261.04026 | -0.1942203 | 0.18908628 | -1.0271517 | 0.30434904 | 0.59933289 |
| Wnt5b       | 124.105091 | -0.1942671 | 0.36509142 | -0.5321052 | 0.59465311 | 0.81785181 |
| Etv6        | 2898.09235 | -0.194295  | 0.27363724 | -0.710046  | 0.47767559 | 0.7424775  |
| Rell1       | 5499.73339 | -0.1943192 | 0.24380514 | -0.7970268 | 0.42543549 | 0.70377154 |
| Arhgap26    | 472.312745 | -0.1944722 | 0.25022726 | -0.7771824 | 0.43705117 | 0.71102725 |
| Hsd17b7     | 1838.77918 | -0.1945174 | 0.23454601 | -0.829336  | 0.40691431 | 0.69089687 |
| Bcat2       | 5352.11446 | -0.1945656 | 0.21481701 | -0.9057271 | 0.36508032 | 0.65505527 |
| Oard1       | 6304.67955 | -0.194608  | 0.1810544  | -1.074859  | 0.28243784 | 0.57481886 |
| Nek2        | 6148.8967  | -0.1946293 | 0.19369309 | -1.0048333 | 0.31497711 | 0.6093449  |
| Ipo9        | 11339.8799 | -0.1946358 | 0.22576622 | -0.8621123 | 0.38862572 | 0.6776332  |
| Cyp2j6      | 279.699428 | -0.1948644 | 0.30077971 | -0.6478641 | 0.51707286 | 0.76793048 |
| Aldh3a2     | 4252.54829 | -0.1949063 | 0.2196958  | -0.8871646 | 0.3749903  | 0.66478273 |
| Itgav       | 5638.22081 | -0.1949261 | 0.26117845 | -0.746333  | 0.45546628 | 0.72593585 |
| Phf11b      | 35.4559964 | -0.1950325 | 0.40978334 | -0.4759406 | 0.63411669 | 0.83926065 |
| Nbas        | 2125.25101 | -0.1950464 | 0.23477699 | -0.8307733 | 0.40610173 | 0.68991262 |
| Dctd        | 3825.44708 | -0.1950483 | 0.28808523 | -0.6770507 | 0.49837378 | 0.75670871 |
| Car13       | 3106.47322 | -0.1951548 | 0.22891623 | -0.8525163 | 0.39392757 | 0.68150459 |
| Ube2b       | 5973.96267 | -0.1952759 | 0.20738619 | -0.9416051 | 0.34639487 | 0.63847181 |
| Dusp7       | 939.268854 | -0.1953091 | 0.24673826 | -0.791564  | 0.42861496 | 0.7047819  |
| Ranbp3      | 7023.83129 | -0.1953409 | 0.20519194 | -0.9519911 | 0.34110148 | 0.63465177 |
| Ppp1r3f     | 95.1900779 | -0.1953608 | 0.32519768 | -0.6007447 | 0.54801001 | 0.78881129 |
| Glis3       | 369.17009  | -0.195483  | 0.34859524 | -0.5607736 | 0.57495186 | 0.80673793 |

|            |            |            |            |            |            |            |
|------------|------------|------------|------------|------------|------------|------------|
| Klhl26     | 1276.75379 | -0.1955992 | 0.19530751 | -1.0014935 | 0.31658829 | 0.61108396 |
| Slc12a2    | 5928.78654 | -0.1956328 | 0.23020137 | -0.8498333 | 0.39541778 | 0.68263121 |
| Leprot     | 5514.89451 | -0.1956483 | 0.19775559 | -0.989344  | 0.32249484 | 0.6168656  |
| Seh1l      | 16722.6562 | -0.195746  | 0.15965844 | -1.2260299 | 0.22018742 | 0.50877701 |
| Acvr2b     | 574.205202 | -0.1957525 | 0.22132111 | -0.8844728 | 0.37644105 | 0.66644294 |
| Crkl       | 6449.8773  | -0.1958366 | 0.2030683  | -0.9643876 | 0.33485163 | 0.62791242 |
| Dgkq       | 1459.91345 | -0.1959991 | 0.19014896 | -1.030766  | 0.30265055 | 0.59790613 |
| Snrnp40    | 10084.0827 | -0.1960487 | 0.16853905 | -1.1632241 | 0.2447386  | 0.53748482 |
| Mrpl50     | 5004.8644  | -0.1961209 | 0.15965522 | -1.2284026 | 0.21929588 | 0.50770735 |
| Myh11      | 16.7214465 | -0.1961322 | 0.42969503 | -0.4564452 | 0.6480699  | 0.8481137  |
| Mfsd6l     | 1.53650642 | -0.1961873 | 0.23405399 | -0.8382138 | 0.40191063 | NA         |
| Xpo7       | 8134.10718 | -0.1963539 | 0.20910605 | -0.9390159 | 0.3477226  | 0.63986259 |
| Prrc2a     | 20302.3999 | -0.1963552 | 0.23307872 | -0.8424414 | 0.39954094 | 0.68486983 |
| Zfp366     | 1.28166069 | -0.1963961 | 0.21123744 | -0.9297411 | 0.35250513 | NA         |
| Cfdp1      | 17263.1582 | -0.1965023 | 0.2309274  | -0.8509267 | 0.39481007 | 0.68226374 |
| Mir7237    | 2.15604141 | -0.1965519 | 0.3176838  | -0.6187028 | 0.53611217 | NA         |
| Rims4      | 23.2753576 | -0.1966005 | 0.40782879 | -0.4820663 | 0.62975887 | 0.83650508 |
| Sptlc3     | 1.36644259 | -0.1968399 | 0.28146687 | -0.6993361 | 0.48434202 | NA         |
| D630041G03 | 1.36644259 | -0.1968399 | 0.28146687 | -0.6993361 | 0.48434202 | NA         |
| Exoc3      | 3917.53965 | -0.1968819 | 0.15455226 | -1.2738856 | 0.20270397 | 0.48733798 |
| Rps24      | 92972.6218 | -0.1968956 | 0.22868556 | -0.8609883 | 0.38924451 | 0.67794934 |
| Tmem145    | 15.2932265 | -0.1969005 | 0.42837431 | -0.4596459 | 0.64577037 | 0.84645778 |
| Mir1907    | 1.35691116 | -0.1969022 | 0.28564933 | -0.6893143 | 0.49062547 | NA         |
| Bcl7a      | 1673.09779 | -0.1970174 | 0.1987272  | -0.991396  | 0.32149225 | 0.61570518 |
| Ctbp1      | 4246.75158 | -0.1970994 | 0.1678743  | -1.1740894 | 0.24035923 | 0.53260564 |
| Sgpp1      | 1599.13026 | -0.1971013 | 0.23524381 | -0.8378595 | 0.40210963 | 0.68675204 |
| Pmpcb      | 6228.6917  | -0.197143  | 0.15009338 | -1.3134691 | 0.18902494 | 0.47055017 |
| Mmgt1      | 2395.53922 | -0.1973105 | 0.192115   | -1.0270438 | 0.30439983 | 0.59935702 |
| Golga2     | 3316.99329 | -0.1973868 | 0.1816211  | -1.0868056 | 0.27712272 | 0.56954016 |
| Layn       | 87.6833211 | -0.1974033 | 0.35368625 | -0.558131  | 0.57675494 | 0.80734073 |
| Apba3      | 1598.59686 | -0.1974686 | 0.20945108 | -0.9427911 | 0.34578777 | 0.63790477 |
| Slc1a5     | 6994.29917 | -0.1974687 | 0.18426541 | -1.0716539 | 0.28387552 | 0.57623655 |
| Apol10b    | 1.46475652 | -0.1976939 | 0.2360307  | -0.8375769 | 0.40226839 | NA         |
| Rsf1       | 7412.42978 | -0.1976955 | 0.16452586 | -1.2016076 | 0.22951561 | 0.52051878 |
| Magoh      | 7448.76789 | -0.1977346 | 0.18052447 | -1.0953342 | 0.27337027 | 0.56629559 |
| Golph3     | 7180.37413 | -0.1977543 | 0.15533078 | -1.273117  | 0.20297653 | 0.48733798 |
| Maml1      | 1818.6362  | -0.1977546 | 0.24398668 | -0.8105138 | 0.41764496 | 0.69868745 |
| Phf10      | 4735.7592  | -0.1977812 | 0.16859318 | -1.1731269 | 0.24074491 | 0.53300457 |
| Kdm5c      | 13425.5847 | -0.197824  | 0.19615527 | -1.008507  | 0.31321114 | 0.60787966 |
| Nsun5      | 1166.06054 | -0.1978367 | 0.18070966 | -1.0947767 | 0.27361447 | 0.56657505 |
| Pdp2       | 4572.00577 | -0.1979177 | 0.28046408 | -0.7056795 | 0.48038747 | 0.74407463 |

|             |            |            |            |            |            |            |
|-------------|------------|------------|------------|------------|------------|------------|
| 6720489N17I | 510.090556 | -0.1979337 | 0.23965302 | -0.8259177 | 0.40885077 | 0.6924459  |
| Qrich1      | 10729.0575 | -0.1979455 | 0.18537358 | -1.0678195 | 0.28560194 | 0.57853274 |
| Spg21       | 5645.42064 | -0.1981057 | 0.18698581 | -1.0594692 | 0.28938614 | 0.58263126 |
| Tvp23b      | 3011.30011 | -0.1982129 | 0.19302279 | -1.0268885 | 0.30447296 | 0.59938614 |
| Fkbp7       | 272.218138 | -0.198364  | 0.29804799 | -0.6655439 | 0.5057027  | 0.76134737 |
| 5031426D15I | 1.29536424 | -0.1983695 | 0.21216698 | -0.9349685 | 0.34980451 | NA         |
| Mob1a       | 4071.32931 | -0.1983706 | 0.25153379 | -0.7886438 | 0.43032023 | 0.70612112 |
| Dlg1        | 10052.1776 | -0.198388  | 0.17149656 | -1.1568047 | 0.24735214 | 0.54032493 |
| Ehmt1       | 4416.41947 | -0.198393  | 0.22303827 | -0.8895019 | 0.37373343 | 0.6634462  |
| Zfp462      | 4669.86862 | -0.1984025 | 0.2990624  | -0.663415  | 0.50706479 | 0.76238659 |
| Ppp4r2      | 5929.12034 | -0.198416  | 0.18109575 | -1.0956412 | 0.27323583 | 0.56626801 |
| Agpat5      | 7165.99188 | -0.1984579 | 0.22899676 | -0.8666407 | 0.38613889 | 0.67521226 |
| Fuk         | 2409.57359 | -0.1985435 | 0.23425913 | -0.8475381 | 0.39669524 | 0.68311652 |
| Atp8b5      | 45.0000405 | -0.1985903 | 0.39033194 | -0.5087729 | 0.61091139 | 0.82651745 |
| Scnn1a      | 57.0404062 | -0.19861   | 0.42646695 | -0.4657103 | 0.64142291 | 0.84346082 |
| Chchd3      | 8160.18775 | -0.1986626 | 0.1884503  | -1.0541911 | 0.29179542 | 0.5855866  |
| Zfp599      | 1940.49511 | -0.198696  | 0.17362945 | -1.1443682 | 0.25247096 | 0.54598821 |
| Sucla2      | 10862.6496 | -0.1987333 | 0.19544535 | -1.016823  | 0.30923763 | 0.60406412 |
| Tbc1d1      | 5368.32723 | -0.1987956 | 0.18396426 | -1.0806207 | 0.27986585 | 0.57228058 |
| Dnmt3a      | 3543.55642 | -0.1988755 | 0.31872111 | -0.6239796 | 0.53264099 | 0.7787064  |
| Adrbk1      | 4605.081   | -0.1988839 | 0.17049542 | -1.1665056 | 0.24341007 | 0.53577799 |
| Zcchc3      | 2518.84954 | -0.1988858 | 0.22035999 | -0.9025493 | 0.36676513 | 0.65694132 |
| Rasip1      | 612.027193 | -0.1989144 | 0.33241195 | -0.5983971 | 0.549575   | 0.79002041 |
| Mir7673     | 14.2673553 | -0.1989181 | 0.43182015 | -0.4606504 | 0.64504948 | 0.84608337 |
| Mrpl22      | 2356.17213 | -0.1989249 | 0.24478478 | -0.8126523 | 0.41641745 | 0.69837863 |
| Cdip1       | 2797.91686 | -0.1989519 | 0.17772459 | -1.1194392 | 0.26295283 | 0.55517933 |
| Stxbp6      | 120.728555 | -0.1991012 | 0.40837617 | -0.4875436 | 0.62587312 | 0.83430078 |
| Pno1        | 9894.91046 | -0.1991269 | 0.18903744 | -1.053373  | 0.29217007 | 0.58603595 |
| Mir6935     | 26.6635048 | -0.1991443 | 0.41128393 | -0.4842015 | 0.62824288 | 0.83566889 |
| Tmem87a     | 6523.11791 | -0.1991679 | 0.17076596 | -1.1663211 | 0.24348464 | 0.53577799 |
| LOC10050502 | 1.35928685 | -0.1991888 | 0.28138834 | -0.7078788 | 0.4790205  | NA         |
| Gdi2        | 35698.3462 | -0.1992236 | 0.15094815 | -1.3198146 | 0.18689694 | 0.46787416 |
| Zc3h18      | 7299.35421 | -0.1993937 | 0.24470764 | -0.8148243 | 0.41517291 | 0.69753175 |
| Acot7       | 5027.83079 | -0.199573  | 0.19326037 | -1.0326637 | 0.30176129 | 0.59697807 |
| Ell2        | 6023.80218 | -0.1995913 | 0.23462081 | -0.8506973 | 0.39493754 | 0.68233238 |
| Rplp0       | 95047.0963 | -0.199659  | 0.19656693 | -1.0157306 | 0.30975769 | 0.60461696 |
| Bloc1s3     | 1039.68124 | -0.1997135 | 0.21669024 | -0.9216546 | 0.35670879 | 0.64788348 |
| Mcm6        | 36025.8142 | -0.1997641 | 0.14770727 | -1.3524323 | 0.17623705 | 0.45380054 |
| Ahr         | 940.392312 | -0.1997735 | 0.22044694 | -0.9062203 | 0.36481928 | 0.6548307  |
| Cstf1       | 4633.97904 | -0.1997859 | 0.18002444 | -1.1097709 | 0.26709774 | 0.55963851 |
| Fam89b      | 511.228093 | -0.1997867 | 0.20271907 | -0.9855348 | 0.32436144 | 0.618534   |

|             |            |            |            |            |            |            |
|-------------|------------|------------|------------|------------|------------|------------|
| Snora65     | 686.087673 | -0.1999508 | 0.21079835 | -0.9485406 | 0.34285432 | 0.63654819 |
| Gnptab      | 3777.86941 | -0.1999671 | 0.19752952 | -1.0123405 | 0.31137527 | 0.60603215 |
| Tmed7       | 8208.23396 | -0.2000698 | 0.15928018 | -1.2560871 | 0.20908441 | 0.49516588 |
| Vps9d1      | 516.107241 | -0.2001219 | 0.28219231 | -0.7091685 | 0.47821993 | 0.74289758 |
| Hccs        | 3691.22397 | -0.2001827 | 0.18873265 | -1.0606682 | 0.28884074 | 0.58216601 |
| Fasn        | 43605.9804 | -0.2002021 | 0.27194732 | -0.7361798 | 0.46162126 | 0.73179789 |
| Cby1        | 1177.92807 | -0.2002744 | 0.21323861 | -0.9392033 | 0.34762637 | 0.63983166 |
| Pkmyt1      | 2853.55912 | -0.2003172 | 0.1999765  | -1.0017037 | 0.31648672 | 0.61108396 |
| Wdr74       | 4966.90276 | -0.2003602 | 0.18922878 | -1.058825  | 0.28967948 | 0.58307087 |
| Spryd4      | 2745.76106 | -0.2003807 | 0.18357698 | -1.0915352 | 0.27503746 | 0.5675013  |
| Cpb1        | 1.55870617 | -0.2004371 | 0.23563428 | -0.8506281 | 0.39497599 | NA         |
| Smg8        | 3552.28512 | -0.2005101 | 0.2221299  | -0.9026705 | 0.3667008  | 0.65694132 |
| Rapgef2     | 1767.74935 | -0.200535  | 0.24813961 | -0.808154  | 0.41900196 | 0.69973018 |
| Cmas        | 4022.17185 | -0.2005514 | 0.18349324 | -1.0929635 | 0.27440981 | 0.56715903 |
| Pbdc1       | 5731.99389 | -0.2006091 | 0.17929752 | -1.1188615 | 0.26319923 | 0.5553611  |
| Cldn5       | 121.349136 | -0.2006573 | 0.37050685 | -0.5415752 | 0.58811115 | 0.81382065 |
| Adap1       | 3254.48691 | -0.200669  | 0.31182888 | -0.6435228 | 0.51988494 | 0.76982772 |
| Lancl2      | 1394.77059 | -0.2007239 | 0.25118321 | -0.7991135 | 0.42422459 | 0.70280233 |
| Aox4        | 90.366635  | -0.200733  | 0.39194627 | -0.5121442 | 0.60855006 | 0.82562526 |
| Pask        | 3284.90961 | -0.2007565 | 0.16173222 | -1.2412895 | 0.21449883 | 0.50160471 |
| Cwc22       | 5023.82236 | -0.2008108 | 0.19503972 | -1.0295894 | 0.30320277 | 0.59849162 |
| Lym9        | 783.66782  | -0.2008944 | 0.27765393 | -0.7235424 | 0.46934669 | 0.73704055 |
| BC005624    | 2194.46109 | -0.2009266 | 0.17752777 | -1.131804  | 0.25771685 | 0.5502471  |
| Plxna1      | 8183.04469 | -0.2009731 | 0.25587676 | -0.7854292 | 0.43220196 | 0.70764083 |
| Smarcd2     | 5635.17808 | -0.2010457 | 0.18008232 | -1.1164101 | 0.26424661 | 0.55583648 |
| Mrpl9       | 3406.51475 | -0.20121   | 0.15617033 | -1.2884007 | 0.19760653 | 0.48086773 |
| Syt3        | 266.972236 | -0.2012231 | 0.36292635 | -0.5544462 | 0.57927352 | 0.80819076 |
| Ankrd61     | 2.78594235 | -0.2013326 | 0.35495831 | -0.5672007 | 0.57057784 | NA         |
| Cep135      | 2170.56881 | -0.2013725 | 0.20562215 | -0.9793325 | 0.32741571 | 0.62070482 |
| lkbkg       | 2366.45762 | -0.2015364 | 0.17852996 | -1.1288662 | 0.25895427 | 0.55124631 |
| Znf512b     | 1917.18978 | -0.20155   | 0.26016949 | -0.7746875 | 0.43852436 | 0.71220104 |
| Rnh1        | 5579.7958  | -0.2015985 | 0.22162035 | -0.909657  | 0.36300341 | 0.65337545 |
| Jmjd6       | 4152.71235 | -0.20162   | 0.17706212 | -1.1386965 | 0.25482975 | 0.54795202 |
| Fam160b1    | 3124.54343 | -0.2016686 | 0.20154831 | -1.000597  | 0.31702168 | 0.6115864  |
| Mir8112     | 31.0727431 | -0.201733  | 0.39685374 | -0.5083309 | 0.61122132 | 0.82675021 |
| Bhlhe23     | 7.26908596 | -0.2017989 | 0.41864981 | -0.4820232 | 0.62978949 | 0.83650508 |
| Sh3bp5l     | 1789.63352 | -0.2018239 | 0.2500464  | -0.8071456 | 0.41958257 | 0.70015213 |
| Cse1l       | 29456.8598 | -0.2019572 | 0.16234364 | -1.2440106 | 0.21349568 | 0.50028431 |
| 2900008C10F | 4.61227706 | -0.2019912 | 0.36730042 | -0.5499345 | 0.58236432 | NA         |
| Mamdc4      | 115.325068 | -0.2021246 | 0.32585384 | -0.6202921 | 0.53506551 | 0.78005097 |
| Kcng3       | 15.494886  | -0.2021672 | 0.43192521 | -0.4680608 | 0.63974114 | 0.84238903 |

|          |            |            |            |            |            |            |
|----------|------------|------------|------------|------------|------------|------------|
| Gcsh     | 11635.868  | -0.2022544 | 0.18288342 | -1.1059196 | 0.2687613  | 0.56176169 |
| Tacc3    | 8772.65625 | -0.2023209 | 0.17459524 | -1.1587999 | 0.24653775 | 0.53953931 |
| Rab19    | 74.4181582 | -0.2023353 | 0.41837245 | -0.4836247 | 0.62865224 | 0.83585593 |
| P2ry4    | 1.41426671 | -0.2023775 | 0.21402921 | -0.9455601 | 0.34437298 | NA         |
| Muc4     | 3.11332837 | -0.2025818 | 0.30252106 | -0.6696453 | 0.50308395 | NA         |
| Rpl39l   | 4735.03218 | -0.2027504 | 0.24155152 | -0.839367  | 0.40126338 | 0.6864738  |
| Cxadr    | 3325.10172 | -0.2028114 | 0.23559424 | -0.8608504 | 0.38932044 | 0.67794934 |
| Zfp74    | 2135.81294 | -0.2028341 | 0.22315396 | -0.9089426 | 0.36338041 | 0.65367309 |
| Rnf125   | 972.850505 | -0.2028503 | 0.28492971 | -0.711931  | 0.47650748 | 0.74161007 |
| Alg3     | 1633.3144  | -0.2028807 | 0.22635899 | -0.8962785 | 0.37010403 | 0.66041168 |
| Prpf39   | 4252.44055 | -0.2030319 | 0.23200059 | -0.8751353 | 0.38150028 | 0.67051434 |
| Gigyf2   | 12564.928  | -0.2030841 | 0.16232902 | -1.2510645 | 0.21091095 | 0.49778092 |
| Slc35g1  | 4460.84894 | -0.2031046 | 0.29072749 | -0.6986082 | 0.48479689 | 0.747183   |
| Tmem35   | 79.8265202 | -0.2031601 | 0.33366732 | -0.6088702 | 0.54261048 | 0.78538119 |
| Ngly1    | 667.77962  | -0.2031666 | 0.28469315 | -0.7136336 | 0.47545376 | 0.74093411 |
| Tmem183a | 7238.73084 | -0.2031712 | 0.15486999 | -1.3118823 | 0.18955984 | 0.47129813 |
| Mrps9    | 5131.73594 | -0.2032551 | 0.17952614 | -1.1321756 | 0.25756061 | 0.55010645 |
| Rpl7l1   | 19440.6782 | -0.2032814 | 0.17327266 | -1.173188  | 0.24072042 | 0.53300457 |
| St8sia6  | 1240.1519  | -0.2034562 | 0.28823203 | -0.7058764 | 0.480265   | 0.74407463 |
| Lap3     | 38368.2515 | -0.2034901 | 0.1496391  | -1.3598723 | 0.17387032 | 0.45108931 |
| Morn1    | 179.487037 | -0.2036129 | 0.3545776  | -0.5742407 | 0.56580496 | 0.80174611 |
| Aox3     | 673.958893 | -0.2036726 | 0.42690304 | -0.4770933 | 0.63329571 | 0.83880262 |
| Zfp113   | 610.719678 | -0.2036822 | 0.18223137 | -1.1177123 | 0.2636899  | 0.55541671 |
| Med24    | 5890.13292 | -0.2037229 | 0.22087103 | -0.9223613 | 0.35634017 | 0.64764337 |
| Slc24a1  | 370.047776 | -0.2037847 | 0.25350147 | -0.8038798 | 0.42146639 | 0.70108061 |
| Zfp704   | 3889.0017  | -0.2037864 | 0.25247164 | -0.8071657 | 0.41957102 | 0.70015213 |
| Plekha2  | 7106.29655 | -0.2038333 | 0.17632631 | -1.1560006 | 0.2476809  | 0.54081517 |
| Svopl    | 2.17812266 | -0.2039032 | 0.32069607 | -0.6358145 | 0.52489735 | NA         |
| Mapkapk3 | 1994.89543 | -0.2039516 | 0.27899802 | -0.7310145 | 0.46477028 | 0.73406893 |
| Ak1      | 6137.49101 | -0.2042035 | 0.21625593 | -0.9442678 | 0.34503282 | 0.63773152 |
| Gata4    | 252.573596 | -0.2042641 | 0.25215045 | -0.8100882 | 0.41788948 | 0.69881121 |
| Wsb1     | 17794.4372 | -0.2043744 | 0.21565914 | -0.9476731 | 0.34329591 | 0.63670595 |
| Fzd2     | 361.793196 | -0.2044372 | 0.25412506 | -0.8044748 | 0.4211228  | 0.70099991 |
| Hsd17b12 | 8702.66894 | -0.204459  | 0.17801958 | -1.1485196 | 0.25075411 | 0.54423965 |
| Fgfr4    | 148.146837 | -0.2045031 | 0.3509073  | -0.5827837 | 0.56003892 | 0.79814554 |
| Fam63a   | 6557.60922 | -0.2045192 | 0.17372968 | -1.1772268 | 0.239105   | 0.53111297 |
| Rassf3   | 842.484836 | -0.2045455 | 0.20462206 | -0.999626  | 0.31749153 | 0.61159656 |
| Mea1     | 2715.84455 | -0.2045773 | 0.23207121 | -0.8815283 | 0.37803194 | 0.66762223 |
| Mrpl11   | 4584.85368 | -0.2046073 | 0.20955323 | -0.9763978 | 0.32886738 | 0.62222868 |
| Cdk5rap2 | 5229.76839 | -0.2046301 | 0.17832244 | -1.1475288 | 0.25116313 | 0.5446713  |
| Otud6b   | 5602.05665 | -0.2046457 | 0.19015746 | -1.0761909 | 0.2818419  | 0.57420719 |

|             |            |            |            |            |            |            |
|-------------|------------|------------|------------|------------|------------|------------|
| Xbp1        | 5679.21583 | -0.2046768 | 0.23279722 | -0.8792063 | 0.37928943 | 0.66834881 |
| Gemin8      | 392.46479  | -0.2046948 | 0.21701698 | -0.9432202 | 0.34556826 | 0.63779826 |
| Nr2f6       | 1059.98205 | -0.2047731 | 0.23615871 | -0.8670995 | 0.38588748 | 0.67503876 |
| Psmg4       | 1346.03405 | -0.2047842 | 0.26273051 | -0.7794459 | 0.43571707 | 0.70987111 |
| Thap3       | 676.457257 | -0.2048266 | 0.30426728 | -0.6731799 | 0.50083285 | 0.75813841 |
| Pts         | 766.14331  | -0.2048664 | 0.28375594 | -0.7219811 | 0.47030608 | 0.73786621 |
| Son         | 24453.6634 | -0.2048807 | 0.22812304 | -0.8981151 | 0.36912419 | 0.65949566 |
| Gcc2        | 3024.7987  | -0.2049211 | 0.21093801 | -0.9714755 | 0.33131154 | 0.62451222 |
| Itch        | 7560.91907 | -0.2049982 | 0.19142328 | -1.0709159 | 0.28420724 | 0.5768346  |
| Ash1l       | 2214.80294 | -0.2051336 | 0.26036224 | -0.7878777 | 0.43076823 | 0.70667088 |
| Plaur       | 346.889377 | -0.2051824 | 0.33261111 | -0.6168838 | 0.53731138 | 0.78120132 |
| Vsig10      | 998.329359 | -0.2051965 | 0.21186442 | -0.9685275 | 0.33278097 | 0.62603606 |
| Cxxc5       | 3273.55813 | -0.2052191 | 0.21116402 | -0.9718467 | 0.3311268  | 0.62431533 |
| Acot10      | 25.2856232 | -0.2052844 | 0.40053913 | -0.5125202 | 0.60828695 | 0.82562526 |
| Lrrc47      | 4865.63345 | -0.2053552 | 0.21067559 | -0.9747461 | 0.32968622 | 0.62303576 |
| Supt20      | 4861.51309 | -0.2053975 | 0.24062797 | -0.8535895 | 0.39333249 | 0.68099684 |
| Tox         | 4.14780015 | -0.2054044 | 0.39039038 | -0.5261513 | 0.59878309 | NA         |
| Rdh13       | 2321.00663 | -0.2054567 | 0.16795878 | -1.2232569 | 0.22123269 | 0.50961184 |
| Glt25d1     | 18565.685  | -0.2056098 | 0.18112439 | -1.1351858 | 0.25629749 | 0.54923505 |
| Neur13      | 18.5094504 | -0.2057523 | 0.42790399 | -0.4808376 | 0.63063194 | 0.83705678 |
| Taf6        | 4612.20746 | -0.2057844 | 0.15620631 | -1.3173884 | 0.18770848 | 0.46907513 |
| Nebi        | 15.4289303 | -0.205859  | 0.42768728 | -0.4813306 | 0.63028152 | 0.83687739 |
| Polr3a      | 3996.61871 | -0.2059927 | 0.20615591 | -0.9992082 | 0.31769384 | 0.61159656 |
| Cdca5       | 5043.87996 | -0.2060121 | 0.20064589 | -1.0267446 | 0.30454074 | 0.59940679 |
| Apof        | 103.081215 | -0.206116  | 0.39224112 | -0.5254829 | 0.5992475  | 0.8201599  |
| Ssx2ip      | 1564.69748 | -0.2062104 | 0.25372042 | -0.8127464 | 0.41636348 | 0.69837863 |
| Eya2        | 25.0382737 | -0.2063178 | 0.42701486 | -0.483163  | 0.62897998 | 0.83614872 |
| Ubap2       | 12717.3552 | -0.2064283 | 0.24112767 | -0.8560955 | 0.39194493 | 0.67995712 |
| 2310039H08I | 373.950111 | -0.2064455 | 0.29339537 | -0.7036426 | 0.48165537 | 0.74482882 |
| Klf3        | 3374.43962 | -0.2064501 | 0.22468523 | -0.9188415 | 0.35817848 | 0.64926373 |
| Rara        | 2597.95902 | -0.2064711 | 0.25933223 | -0.7961646 | 0.4259364  | 0.70402942 |
| Fam220a     | 811.077682 | -0.2066724 | 0.20758684 | -0.9955948 | 0.31944705 | 0.61307183 |
| Tbc1d2      | 643.400499 | -0.2067112 | 0.24024886 | -0.8604045 | 0.38956611 | 0.67794934 |
| Map2k3os    | 197.61352  | -0.2068289 | 0.26127986 | -0.7915992 | 0.42859443 | 0.7047819  |
| Dus1l       | 5362.43748 | -0.2068982 | 0.21769414 | -0.9504076 | 0.34190517 | 0.63539283 |
| Nck2        | 1090.50245 | -0.2069689 | 0.19400358 | -1.0668304 | 0.28604842 | 0.57916346 |
| Nup153      | 15424.1251 | -0.2069898 | 0.24518523 | -0.844218  | 0.39854757 | 0.6844631  |
| Adm         | 18.5732687 | -0.2070492 | 0.42483389 | -0.4873651 | 0.6259996  | 0.83432634 |
| Selplg      | 102.398249 | -0.2070872 | 0.35356031 | -0.5857197 | 0.55806392 | 0.79653452 |
| Mtmr6       | 2213.47093 | -0.2070977 | 0.17126911 | -1.2091946 | 0.2265881  | 0.51681895 |
| Npy         | 6.99601551 | -0.2071113 | 0.41452233 | -0.4996385 | 0.61732967 | 0.83032065 |



|              |            |            |            |            |            |            |
|--------------|------------|------------|------------|------------|------------|------------|
| Taf9         | 3133.17847 | -0.2071717 | 0.19484666 | -1.0632551 | 0.2876663  | 0.58112478 |
| Mfsd6        | 214.711359 | -0.2071728 | 0.29918327 | -0.6924613 | 0.48864768 | 0.74962613 |
| 6330416G13I  | 879.303424 | -0.2072099 | 0.22678097 | -0.9137007 | 0.36087415 | 0.65179488 |
| Atp5h        | 13004.3064 | -0.2073479 | 0.22399004 | -0.9257015 | 0.35460114 | 0.64618462 |
| Upf3a        | 2910.22482 | -0.2074129 | 0.21134456 | -0.9813968 | 0.32639713 | 0.61957682 |
| Fam92a       | 2789.57164 | -0.2074417 | 0.23714485 | -0.874747  | 0.38171159 | 0.67065405 |
| Aass         | 196.035173 | -0.2074906 | 0.41086067 | -0.5050145 | 0.61354868 | 0.82850171 |
| Ptpn2        | 7245.0085  | -0.2074934 | 0.16343737 | -1.2695588 | 0.20424183 | 0.48937571 |
| Pde4dip      | 2166.29222 | -0.2075152 | 0.2017601  | -1.0285243 | 0.30370325 | 0.5985887  |
| Dsg2         | 10359.8391 | -0.2075537 | 0.22026445 | -0.942293  | 0.34604263 | 0.63804944 |
| Zfp954       | 983.261842 | -0.2076044 | 0.18504466 | -1.121915  | 0.26189858 | 0.5542712  |
| Tle4         | 6121.54037 | -0.2076156 | 0.26890842 | -0.7720682 | 0.44007405 | 0.71413874 |
| Nt5dc2       | 4478.94831 | -0.2077401 | 0.23086287 | -0.8998421 | 0.36820429 | 0.6586088  |
| I730030J21Ri | 1.38577077 | -0.2078159 | 0.28679363 | -0.7246183 | 0.46868625 | NA         |
| Pstpip1      | 289.686757 | -0.2079248 | 0.22868172 | -0.9092322 | 0.36322759 | 0.65361632 |
| Usp21        | 3015.58663 | -0.2079526 | 0.22129427 | -0.9397108 | 0.34736593 | 0.63973089 |
| Ccar2        | 2882.91202 | -0.2080016 | 0.24076071 | -0.8639348 | 0.38762372 | 0.67661202 |
| Ndufv3       | 4772.10035 | -0.2080442 | 0.23209183 | -0.8963875 | 0.37004584 | 0.66038362 |
| Nudt14       | 831.187114 | -0.2082173 | 0.26651562 | -0.7812575 | 0.43465104 | 0.70881484 |
| Ceacam9      | 9.84313993 | -0.2082375 | 0.42221592 | -0.4932014 | 0.62187027 | 0.83196874 |
| Srsf7        | 32228.9822 | -0.2082416 | 0.17739087 | -1.173914  | 0.24042947 | 0.53268538 |
| Arl13b       | 1676.42376 | -0.2082833 | 0.18858402 | -1.1044588 | 0.26939416 | 0.5624056  |
| Pigb         | 541.110461 | -0.2083576 | 0.26832479 | -0.7765125 | 0.43744643 | 0.71150815 |
| Mtmr9        | 2896.16486 | -0.2084719 | 0.22268626 | -0.9361685 | 0.34918645 | 0.64162941 |
| Lhfpl5       | 19.533801  | -0.2084776 | 0.43226652 | -0.4822895 | 0.62960033 | 0.83647285 |
| 1110037F02F  | 5859.26394 | -0.2084845 | 0.19989385 | -1.042976  | 0.29695942 | 0.59129526 |
| Impad1       | 7088.1875  | -0.208504  | 0.23644973 | -0.8818113 | 0.37787885 | 0.66753344 |
| Vprbp        | 10034.0511 | -0.2085214 | 0.21468514 | -0.9712892 | 0.33140427 | 0.6245356  |
| Hspbp1       | 2819.12909 | -0.2086451 | 0.18993814 | -1.09849   | 0.2719906  | 0.56547137 |
| Fastkd1      | 2301.47508 | -0.2087585 | 0.18384968 | -1.1354845 | 0.25617238 | 0.54910222 |
| Mcm9         | 946.96278  | -0.2088178 | 0.19401871 | -1.0762765 | 0.2818036  | 0.57420438 |
| Syce3        | 24.0170838 | -0.2088888 | 0.42715265 | -0.489026  | 0.6248233  | 0.8335444  |
| Thoc7        | 3850.05519 | -0.2089088 | 0.17644193 | -1.184009  | 0.2364095  | 0.52810283 |
| Gucd1        | 1101.82669 | -0.2089572 | 0.17698366 | -1.1806579 | 0.23773866 | 0.52993576 |
| Prpf40a      | 17010.3088 | -0.2091247 | 0.19032295 | -1.0987887 | 0.27186023 | 0.56527591 |
| Dhrs2        | 2.40097833 | -0.2091833 | 0.346865   | -0.6030684 | 0.54646316 | NA         |
| Fstl5        | 7.57984006 | -0.2092236 | 0.29059554 | -0.719982  | NA         | NA         |
| Slc5a10      | 13.4910137 | -0.2092716 | 0.43226833 | -0.4841242 | 0.62829772 | 0.83567036 |
| Ostm1        | 4234.24274 | -0.2093794 | 0.22234141 | -0.9417023 | 0.34634509 | 0.63845572 |
| Nfrkb        | 2968.03443 | -0.2094051 | 0.21793635 | -0.9608546 | 0.33662528 | 0.62930255 |
| Pmis2        | 13.6723128 | -0.2094849 | 0.43217559 | -0.4847218 | 0.6278737  | 0.83543543 |

|             |            |            |            |            |            |            |
|-------------|------------|------------|------------|------------|------------|------------|
| Tmem39a     | 8639.04548 | -0.209485  | 0.19567948 | -1.0705518 | 0.28437102 | 0.57703758 |
| Snrnp25     | 2037.24111 | -0.2094952 | 0.23640806 | -0.8861592 | 0.37553174 | 0.66536335 |
| Cenpp       | 2079.65889 | -0.2095499 | 0.1837754  | -1.1402501 | 0.25418213 | 0.54726985 |
| Rdh1        | 0.88108956 | -0.2096801 | 0.21743311 | -0.964343  | 0.33487398 | NA         |
| Mcidas      | 2.74676175 | -0.2097742 | 0.34977031 | -0.5997483 | 0.54867397 | NA         |
| Tcaim       | 767.209359 | -0.2097995 | 0.19127774 | -1.0968316 | 0.272715   | 0.56606275 |
| Ppp1r15b    | 11108.6541 | -0.2098139 | 0.17210719 | -1.2190883 | 0.22281067 | 0.51187866 |
| Dctn2       | 9351.25593 | -0.2098784 | 0.19234052 | -1.0911814 | 0.27519306 | 0.5675013  |
| Sox2        | 33524.3319 | -0.2100199 | 0.14652165 | -1.4333712 | 0.15175178 | 0.41871751 |
| Fbxw2       | 5124.66804 | -0.2101542 | 0.1494313  | -1.4063598 | 0.15961731 | 0.43063997 |
| Bzw2        | 12233.894  | -0.210367  | 0.16989052 | -1.2382504 | 0.21562322 | 0.5027617  |
| Fech        | 2184.8043  | -0.2104965 | 0.18005873 | -1.1690438 | 0.24238598 | 0.53472044 |
| Ccdc9       | 1784.2775  | -0.2105029 | 0.1852092  | -1.1365684 | 0.25571877 | 0.54856501 |
| Ddx21       | 31017.0916 | -0.2105114 | 0.22315575 | -0.9433383 | 0.34550791 | 0.63779826 |
| 5530601H04I | 363.722026 | -0.2105388 | 0.20909649 | -1.0068977 | 0.31398396 | 0.60841899 |
| 9030625G05I | 50.8551311 | -0.2105667 | 0.41850325 | -0.5031423 | 0.61486421 | 0.82951097 |
| Zdhhc7      | 837.551581 | -0.2105969 | 0.20923093 | -1.0065287 | 0.31416133 | 0.60856039 |
| Ap2b1       | 12211.9943 | -0.2107696 | 0.1962253  | -1.0741202 | 0.28276883 | 0.57511615 |
| Rhno1       | 2460.87593 | -0.210896  | 0.17922961 | -1.1766804 | 0.23932309 | 0.5313496  |
| Trap1       | 17692.5708 | -0.2110257 | 0.14352523 | -1.4703035 | 0.14147956 | 0.40192705 |
| Fam162a     | 4158.90303 | -0.211033  | 0.30450981 | -0.6930254 | 0.48829362 | 0.74937867 |
| Rbm8a       | 16250.1446 | -0.2110331 | 0.18788128 | -1.1232259 | 0.26134158 | 0.5536198  |
| Dnajc27     | 1385.74247 | -0.2110738 | 0.19716788 | -1.0705286 | 0.28438146 | 0.57703758 |
| Gmeb2       | 1902.70831 | -0.2110753 | 0.16243037 | -1.2994816 | 0.19377872 | 0.47646674 |
| ldh3g       | 9732.4068  | -0.2111462 | 0.18094033 | -1.1669381 | 0.24323538 | 0.53577799 |
| Lrrc6       | 11.0558166 | -0.2111687 | 0.43040987 | -0.4906224 | 0.62369351 | 0.8326801  |
| 2700029M09  | 5208.98067 | -0.2111987 | 0.20848686 | -1.0130074 | 0.31105665 | 0.6056394  |
| Osgin2      | 1594.08874 | -0.2112105 | 0.18230423 | -1.1585606 | 0.24663535 | 0.53953931 |
| Paox        | 736.816302 | -0.2113013 | 0.25889304 | -0.8161722 | 0.41440168 | 0.69676294 |
| Tbc1d2b     | 1321.41171 | -0.2113561 | 0.20752377 | -1.0184669 | 0.30845614 | 0.60292433 |
| Arhgap22    | 205.220024 | -0.2114344 | 0.24820905 | -0.8518402 | 0.39430281 | 0.6819176  |
| Ankfy1      | 6675.14888 | -0.2114655 | 0.22682237 | -0.9322955 | 0.35118383 | 0.64318216 |
| Rpl14-ps1   | 619.867679 | -0.2115006 | 0.21961573 | -0.9630485 | 0.33552317 | 0.62818695 |
| Git1        | 5093.94926 | -0.2115473 | 0.21159883 | -0.9997566 | 0.3174283  | 0.61159656 |
| Syne4       | 1152.62456 | -0.2116193 | 0.2524024  | -0.8384204 | 0.40179465 | 0.68675204 |
| Zfpm1       | 500.849909 | -0.2117481 | 0.27246098 | -0.7771686 | 0.43705932 | 0.71102725 |
| BC030870    | 1.17784062 | -0.2117948 | 0.25526549 | -0.8297039 | 0.40670619 | NA         |
| Med16       | 1661.96599 | -0.2118066 | 0.19325045 | -1.096021  | 0.27306958 | 0.56626801 |
| Ntn4        | 9.43270039 | -0.2118075 | 0.39652706 | -0.5341565 | 0.59323326 | 0.81705522 |
| Tab3        | 2722.29393 | -0.2119804 | 0.20072436 | -1.0560769 | 0.29093309 | 0.58476633 |
| Aldoa       | 116036.978 | -0.2120693 | 0.27319719 | -0.7762501 | 0.43760134 | 0.7115571  |

|             |            |            |            |            |            |            |
|-------------|------------|------------|------------|------------|------------|------------|
| Eif4ebp1    | 23419.318  | -0.2121    | 0.21296276 | -0.9959487 | 0.31927506 | 0.61303091 |
| Fam96b      | 2286.75893 | -0.2121119 | 0.1989393  | -1.066214  | 0.2863269  | 0.57949961 |
| Tmed1       | 2557.04743 | -0.2121364 | 0.20816294 | -1.0190882 | 0.3081611  | 0.60283181 |
| Myo1c       | 8456.75032 | -0.2121488 | 0.25991843 | -0.816213  | 0.41437834 | 0.69676294 |
| Sec16a      | 5065.18671 | -0.2121958 | 0.28474106 | -0.7452238 | 0.45613642 | 0.72648274 |
| Mecr        | 868.723849 | -0.2122018 | 0.17349668 | -1.2230884 | 0.22129632 | 0.50968293 |
| Ash2l       | 33978.5765 | -0.2122878 | 0.17391403 | -1.2206482 | 0.22221926 | 0.51090346 |
| Gm14393     | 327.026104 | -0.2122929 | 0.23119097 | -0.9182579 | 0.35848385 | 0.64959011 |
| Polr2h      | 4212.00222 | -0.2123512 | 0.18954275 | -1.1203341 | 0.2625714  | 0.5549512  |
| 2610318N02l | 1219.0685  | -0.212364  | 0.23013267 | -0.9227893 | 0.35611703 | 0.64764054 |
| Dsn1        | 2441.54906 | -0.2125563 | 0.16721169 | -1.271181  | 0.20366425 | 0.48831063 |
| Vps4a       | 2600.99508 | -0.2127252 | 0.1559504  | -1.3640568 | 0.17254969 | 0.44946737 |
| Wwp1        | 6261.1584  | -0.2127436 | 0.20040753 | -1.0615549 | 0.28843778 | 0.58207837 |
| Vrk2        | 1474.84502 | -0.2127699 | 0.24117212 | -0.8822326 | 0.37765102 | 0.6672936  |
| Tceal3      | 2.77186141 | -0.2128511 | 0.35550192 | -0.5987341 | 0.54935018 | NA         |
| Agr2        | 1.35653378 | -0.2129967 | 0.28966869 | -0.7353114 | 0.46214989 | NA         |
| Wdr75       | 12598.0436 | -0.2130023 | 0.15852926 | -1.3436148 | 0.17907298 | 0.45711817 |
| Uncx        | 2.2671802  | -0.2133017 | 0.3138973  | -0.6795272 | 0.49680389 | NA         |
| Lsm3        | 8438.87529 | -0.2133292 | 0.20189974 | -1.0566097 | 0.29068975 | 0.58465032 |
| Ppp1r2      | 3466.78031 | -0.2133677 | 0.21640662 | -0.9859575 | 0.32415397 | 0.618534   |
| Trim40      | 67.035     | -0.213384  | 0.38884293 | -0.5487665 | 0.58316572 | 0.81058367 |
| Dpf2        | 5582.11063 | -0.2133969 | 0.19583219 | -1.0896927 | 0.27584852 | 0.56820011 |
| Pola2       | 6185.4589  | -0.2135084 | 0.16481409 | -1.2954501 | 0.195165   | 0.47806832 |
| Med13       | 4351.59162 | -0.2136115 | 0.27318611 | -0.7819267 | 0.43425767 | 0.70860901 |
| Dse         | 6553.58708 | -0.2136548 | 0.19605596 | -1.0897642 | 0.27581704 | 0.56820011 |
| Dph7        | 1594.53849 | -0.2138308 | 0.16096466 | -1.328433  | 0.18403512 | 0.46444825 |
| Adora1      | 4.22597118 | -0.2139536 | 0.33055639 | -0.647253  | 0.51746822 | NA         |
| Tspan13     | 3690.09402 | -0.2139989 | 0.20533585 | -1.0421898 | 0.29732371 | 0.59166236 |
| Pdcd10      | 3043.05778 | -0.2140504 | 0.17298914 | -1.2373635 | 0.21595217 | 0.50296124 |
| Ube2ql1     | 119.278329 | -0.2143396 | 0.43180049 | -0.4963857 | 0.61962232 | 0.83116939 |
| Src         | 4933.7165  | -0.214379  | 0.19899822 | -1.077291  | 0.28135028 | 0.57358132 |
| Rps8        | 78126.0423 | -0.2143902 | 0.21131051 | -1.014574  | 0.31030893 | 0.60486516 |
| Clec2f      | 3.42739033 | -0.2144029 | 0.33969924 | -0.631155  | 0.52793921 | NA         |
| Plp1        | 307.54274  | -0.2144492 | 0.28634393 | -0.7489218 | 0.45390435 | 0.72485793 |
| Ddx10       | 9601.59665 | -0.2146456 | 0.15583307 | -1.377407  | 0.16838645 | 0.44330077 |
| D930028M14  | 8.46283984 | -0.2146687 | 0.43033314 | -0.498843  | 0.61788999 | 0.83032275 |
| Unc13d      | 618.740251 | -0.2147201 | 0.28702879 | -0.7480785 | 0.4544128  | 0.72518943 |
| Gpr62       | 16.6278359 | -0.2147812 | 0.43017686 | -0.4992858 | 0.61757808 | 0.83032065 |
| Psme4       | 27204.1049 | -0.2148133 | 0.25720903 | -0.83517   | 0.40362202 | 0.68793578 |
| Zfp740      | 8268.99876 | -0.2150152 | 0.22871631 | -0.9400955 | 0.34716858 | 0.63965147 |
| Zfp217      | 6781.86313 | -0.2153677 | 0.17907403 | -1.2026739 | 0.22910255 | 0.52003704 |

|             |            |            |            |            |            |            |
|-------------|------------|------------|------------|------------|------------|------------|
| Cebpa       | 78.9970497 | -0.2154435 | 0.40834123 | -0.5276064 | 0.59777254 | 0.81972425 |
| Tapt1       | 1782.69605 | -0.2154888 | 0.16557578 | -1.3014514 | 0.193104   | 0.47575417 |
| Igsf9b      | 451.273429 | -0.2155328 | 0.37434121 | -0.5757655 | 0.5647737  | 0.8012435  |
| Il17ra      | 366.05251  | -0.2155573 | 0.27136694 | -0.7943388 | 0.42699821 | 0.70407759 |
| Hsd17b14    | 4592.34129 | -0.2155925 | 0.32831545 | -0.6566626 | 0.5113979  | 0.76501865 |
| Trim75      | 0.91974593 | -0.2156374 | 0.22010668 | -0.9796947 | 0.32723683 | NA         |
| Tdp2        | 5589.8857  | -0.2156569 | 0.18028605 | -1.1961928 | 0.23162134 | 0.52302118 |
| 2610507B11f | 24876.3266 | -0.2157702 | 0.23387234 | -0.9225984 | 0.35621654 | 0.64764054 |
| Urb1        | 5433.41452 | -0.2157807 | 0.25451729 | -0.8478035 | 0.3965474  | 0.68311652 |
| Cib4        | 4.40756425 | -0.2159981 | 0.34954329 | -0.6179439 | 0.53661231 | NA         |
| A330093E20f | 1.56883549 | -0.2160109 | 0.22018783 | -0.9810301 | 0.32657789 | NA         |
| Fmn1        | 1035.43237 | -0.2160304 | 0.24177187 | -0.8935301 | 0.37157338 | 0.66164325 |
| Exo1        | 5571.42011 | -0.2160715 | 0.17450091 | -1.2382257 | 0.21563238 | 0.5027617  |
| Malsu1      | 1669.41946 | -0.2161203 | 0.21206012 | -1.0191462 | 0.30813358 | 0.60283181 |
| Hnrnpdl     | 24207.5984 | -0.2161528 | 0.18988087 | -1.1383602 | 0.25497009 | 0.54796018 |
| Mier3       | 4569.01438 | -0.2162878 | 0.18217221 | -1.1872709 | 0.23512079 | 0.52698982 |
| Sf3a3       | 11449.357  | -0.2163299 | 0.17586137 | -1.2301159 | 0.21865371 | 0.50697538 |
| Gnl2        | 7881.77361 | -0.2163311 | 0.14443418 | -1.4977832 | 0.13418959 | 0.39146902 |
| Cyb561d1    | 347.299518 | -0.2165125 | 0.25040271 | -0.8646573 | 0.38722689 | 0.67614702 |
| Pgm3        | 3922.68572 | -0.2165673 | 0.17701558 | -1.2234365 | 0.22116486 | 0.50953108 |
| Tom1l1      | 2309.16412 | -0.2165694 | 0.31693492 | -0.6833244 | 0.49440188 | 0.7544987  |
| Numa1       | 12137.4191 | -0.2165768 | 0.20363101 | -1.0635749 | 0.28752134 | 0.5809829  |
| Has2        | 6.56995764 | -0.2166078 | 0.42172508 | -0.5136233 | 0.60751537 | 0.82510669 |
| Nbr1        | 15314.2447 | -0.2166237 | 0.15019938 | -1.4422411 | 0.14923438 | 0.41471476 |
| Afg3l2      | 8143.3857  | -0.2166751 | 0.16367192 | -1.3238377 | 0.18555695 | 0.46609532 |
| Crispld1    | 66.6108109 | -0.2167632 | 0.43154392 | -0.5022969 | 0.61545868 | 0.82965647 |
| Helb        | 7423.75572 | -0.2167691 | 0.18341828 | -1.1818293 | 0.23727345 | 0.52931278 |
| Maff        | 522.449841 | -0.2169841 | 0.39537136 | -0.548811  | 0.58313516 | 0.81058367 |
| H6pd        | 2458.87805 | -0.2169896 | 0.19147384 | -1.1332596 | 0.25710525 | 0.5500404  |
| Krt78       | 1.19001306 | -0.2171973 | 0.25604498 | -0.8482777 | 0.39628332 | NA         |
| Igsf1       | 40.8605331 | -0.2173049 | 0.40374721 | -0.5382202 | 0.59042504 | 0.8154987  |
| Mmp16       | 5.44205149 | -0.2175221 | 0.41227974 | -0.527608  | 0.59777142 | NA         |
| Kri1        | 3532.90399 | -0.2177333 | 0.19838054 | -1.0975539 | 0.27239935 | 0.56572838 |
| Cdyl2       | 9389.69127 | -0.2177714 | 0.22658589 | -0.9610986 | 0.33650258 | 0.6291874  |
| 1700034F02f | 16.4317687 | -0.2177854 | 0.43224055 | -0.5038522 | 0.61436521 | 0.82912379 |
| Opa3        | 1522.52761 | -0.2178277 | 0.23056936 | -0.9447382 | 0.34479256 | 0.63773152 |
| Rin2        | 479.896064 | -0.2179062 | 0.36242663 | -0.6012423 | 0.54767864 | 0.78860653 |
| Sarnp       | 7379.46634 | -0.2179242 | 0.18368037 | -1.1864316 | 0.23545191 | 0.52736751 |
| Mtfr1       | 8960.9025  | -0.2179866 | 0.14600197 | -1.4930387 | 0.13542706 | 0.39321069 |
| Kpnb1       | 69019.2998 | -0.2180088 | 0.1925303  | -1.1323351 | 0.25749358 | 0.55010645 |
| Tmc6        | 2345.5352  | -0.218158  | 0.18017129 | -1.2108368 | 0.22595794 | 0.51577873 |

|             |            |            |            |            |            |            |
|-------------|------------|------------|------------|------------|------------|------------|
| 1700012D14I | 12.6754861 | -0.2182108 | 0.43170219 | -0.5054661 | 0.61323147 | 0.82831257 |
| Slc35a5     | 1023.61447 | -0.218221  | 0.2377913  | -0.9176995 | 0.35877622 | 0.64978295 |
| Gm15698     | 920.430959 | -0.2183728 | 0.38253983 | -0.5708499 | 0.56810136 | 0.80306738 |
| Ptges2      | 1377.95803 | -0.2183972 | 0.19529791 | -1.1182773 | 0.2634486  | 0.55541671 |
| Vmn2r57     | 9.67447768 | -0.2184493 | 0.4292852  | -0.5088675 | 0.6108451  | 0.82651745 |
| Timm9       | 1986.92001 | -0.218478  | 0.18700153 | -1.1683222 | 0.24267682 | 0.53484513 |
| Zfp345      | 1001.85872 | -0.2185282 | 0.22419343 | -0.9747305 | 0.32969398 | 0.62303576 |
| Mxd3        | 475.667442 | -0.2185786 | 0.28856997 | -0.7574544 | 0.44877766 | 0.72156136 |
| Mob1b       | 1128.36317 | -0.2186079 | 0.32078768 | -0.6814722 | 0.49557278 | 0.75533199 |
| Snord47     | 571.781002 | -0.2186079 | 0.24859327 | -0.87938   | 0.37919528 | 0.66834881 |
| Zc3h7b      | 7248.29656 | -0.2186162 | 0.2133047  | -1.0249009 | 0.30540994 | 0.59990273 |
| Kdr         | 133.025369 | -0.2186388 | 0.32003049 | -0.6831812 | 0.49449236 | 0.7544987  |
| Cox7a2l     | 5152.65759 | -0.2188199 | 0.21099865 | -1.0370679 | 0.29970419 | 0.59454027 |
| Riok3       | 8230.85249 | -0.2188612 | 0.19366189 | -1.1301201 | 0.2584256  | 0.55101675 |
| Hnrnpu      | 83192.2872 | -0.2188869 | 0.16448232 | -1.3307624 | 0.1832672  | 0.46341272 |
| Cbx5        | 34688.728  | -0.2189037 | 0.1980306  | -1.1054035 | 0.26898479 | 0.56201096 |
| Pck2        | 4365.61582 | -0.2189136 | 0.2382133  | -0.9189814 | 0.3581053  | 0.64926373 |
| 2310035C23F | 3605.68914 | -0.2189207 | 0.23673537 | -0.9247487 | 0.35509663 | 0.64691984 |
| Evi5l       | 205.190111 | -0.2189388 | 0.30568379 | -0.7162263 | 0.4738516  | 0.74014326 |
| Yy2         | 787.384578 | -0.2189495 | 0.2323402  | -0.9423662 | 0.34600521 | 0.63804944 |
| Anapc15     | 3052.48306 | -0.218993  | 0.19115799 | -1.1456126 | 0.25195546 | 0.54567942 |
| Tnk2        | 6567.95011 | -0.2189958 | 0.20066787 | -1.0913349 | 0.27512556 | 0.5675013  |
| lfrd2       | 3195.49048 | -0.2190129 | 0.19991486 | -1.0955309 | 0.27328412 | 0.56626801 |
| lst1        | 7660.63497 | -0.2192411 | 0.24392457 | -0.8988071 | 0.36875539 | 0.65913197 |
| Tkt         | 42396.2601 | -0.2192721 | 0.17528236 | -1.2509649 | 0.21094727 | 0.49778092 |
| 8030423F21F | 2.43368478 | -0.2192963 | 0.31503365 | -0.6961043 | 0.48636352 | NA         |
| Pnpo        | 2805.24912 | -0.2193435 | 0.21163355 | -1.0364308 | 0.30000121 | 0.59491442 |
| Nsdhl       | 3815.50858 | -0.2193623 | 0.18525378 | -1.1841179 | 0.2363664  | 0.52810283 |
| Eif1a       | 22224.9576 | -0.2194166 | 0.16287092 | -1.3471811 | 0.17792191 | 0.45556244 |
| Pcnp        | 4660.56227 | -0.2194453 | 0.24949305 | -0.8795648 | 0.37909511 | 0.66834881 |
| Dtnb        | 2773.24594 | -0.2194567 | 0.15593797 | -1.4073331 | 0.15932864 | 0.43014212 |
| Pdxk-ps     | 7.02262403 | -0.2195489 | 0.41556659 | -0.5283123 | 0.5972826  | 0.81955501 |
| Bambi-ps1   | 4.33198976 | -0.2195742 | 0.38922742 | -0.5641283 | 0.5726668  | NA         |
| Snd1        | 14212.2021 | -0.2196193 | 0.15381158 | -1.4278466 | 0.153336   | 0.42114592 |
| Nup210      | 10637.1909 | -0.2196453 | 0.21154322 | -1.0383001 | 0.29913038 | 0.59386908 |
| Polq        | 1346.7301  | -0.2197652 | 0.22328051 | -0.9842559 | 0.32498969 | 0.6188465  |
| 2810468N07I | 34.6273327 | -0.2198754 | 0.42739636 | -0.5144532 | 0.60693519 | 0.82467883 |
| Abcb8       | 1720.65394 | -0.2199602 | 0.17794896 | -1.2360861 | 0.21642655 | 0.50376429 |
| Ccng2       | 1227.28288 | -0.2199619 | 0.29976239 | -0.7337877 | 0.46307815 | 0.73295963 |
| Azi2        | 2898.3101  | -0.2199695 | 0.15014487 | -1.4650484 | 0.14290771 | 0.40406505 |
| Tnp1        | 2.18837047 | -0.2199709 | 0.29327613 | -0.7500469 | 0.45322643 | NA         |

|            |            |            |            |            |            |            |
|------------|------------|------------|------------|------------|------------|------------|
| Tmem5      | 1765.69196 | -0.2199964 | 0.20035772 | -1.098018  | 0.27219665 | 0.56560113 |
| Wdr76      | 10965.4789 | -0.219997  | 0.2088824  | -1.0532099 | 0.29224481 | 0.58609887 |
| Adamtsl5   | 94.7545744 | -0.220316  | 0.30824013 | -0.7147545 | 0.47476078 | 0.74052205 |
| Mup6       | 156.989197 | -0.2204027 | 0.39008632 | -0.5650099 | 0.572067   | 0.80545169 |
| Fhod1      | 899.650592 | -0.220419  | 0.28306862 | -0.778677  | 0.43616999 | 0.7101063  |
| Ccser2     | 3733.31115 | -0.2204565 | 0.24655    | -0.8941656 | 0.37123328 | 0.66151584 |
| Mup20      | 1.45842921 | -0.2205168 | 0.22217553 | -0.9925343 | 0.32093697 | NA         |
| Sncg       | 275.561307 | -0.2205571 | 0.29372336 | -0.7509007 | 0.45271241 | 0.72421877 |
| Lrr1       | 1695.80316 | -0.2205817 | 0.26202475 | -0.8418355 | 0.39988006 | 0.68508701 |
| Plekhg4    | 56.6767315 | -0.22065   | 0.42245778 | -0.5223007 | 0.60146099 | 0.82154763 |
| Hn1l       | 17245.8096 | -0.2206623 | 0.20516703 | -1.0755252 | 0.28213967 | 0.574588   |
| Fam49b     | 13938.4043 | -0.2206884 | 0.18166327 | -1.2148211 | 0.22443434 | 0.51368924 |
| Khdc1b     | 11.7074604 | -0.2207974 | 0.37264302 | -0.5925173 | 0.55350426 | 0.79259159 |
| Rprd1a     | 3160.14225 | -0.2209607 | 0.23664321 | -0.9337293 | 0.35044355 | 0.64235593 |
| Zcchc18    | 131.160372 | -0.2210035 | 0.31147767 | -0.7095325 | 0.4779941  | 0.74273443 |
| Leng8      | 6283.09406 | -0.221062  | 0.1879047  | -1.1764578 | 0.23941197 | 0.53140707 |
| Mtpap      | 3298.37984 | -0.2211157 | 0.17480853 | -1.2649023 | 0.20590636 | 0.49075903 |
| Mest       | 3096.43115 | -0.2211912 | 0.33767678 | -0.6550383 | 0.51244313 | 0.76532398 |
| Pkn2       | 10235.5676 | -0.2212259 | 0.19457075 | -1.1369948 | 0.25554048 | 0.54856501 |
| Med23      | 3648.63601 | -0.2212337 | 0.23645671 | -0.9356202 | 0.34946877 | 0.6418553  |
| Nup210l    | 245.426528 | -0.2213873 | 0.36323632 | -0.6094855 | 0.54220265 | 0.78508319 |
| Lsm8       | 4381.20233 | -0.2214792 | 0.22521893 | -0.9833951 | 0.32541301 | 0.61902113 |
| Cd4        | 105.823931 | -0.2215095 | 0.42358928 | -0.5229346 | 0.60101979 | 0.82152226 |
| Xrcc5      | 18132.1086 | -0.221612  | 0.15130946 | -1.4646277 | 0.14302252 | 0.40424269 |
| Tgm5       | 2.76718371 | -0.2216313 | 0.32600753 | -0.6798349 | 0.49660898 | NA         |
| Chac1      | 1004.67587 | -0.2217259 | 0.26328666 | -0.8421464 | 0.39970601 | 0.68491125 |
| Birc7      | 375.520033 | -0.221767  | 0.39741928 | -0.5580176 | 0.57683236 | 0.80734073 |
| Eif3h      | 16621.5494 | -0.2217749 | 0.18062008 | -1.2278531 | 0.21950211 | 0.50803353 |
| Rbm10      | 5471.54733 | -0.2217837 | 0.19468363 | -1.1392007 | 0.25461944 | 0.54788804 |
| Fgfr1op2   | 3196.25477 | -0.2218196 | 0.15292226 | -1.4505384 | 0.14690844 | 0.41138842 |
| Mad2l2     | 1779.74069 | -0.221876  | 0.20470502 | -1.0838815 | 0.27841736 | 0.57075699 |
| Arfgef1    | 4974.35079 | -0.2220333 | 0.24686426 | -0.8994144 | 0.36843198 | 0.65878874 |
| Zfp229     | 9813.63947 | -0.2220919 | 0.23754384 | -0.9349513 | 0.34981341 | 0.64198366 |
| Mkl2       | 1564.84969 | -0.2222255 | 0.22358195 | -0.993933  | 0.32025548 | 0.61412854 |
| D630032N06 | 43.3433437 | -0.2222277 | 0.36646922 | -0.6064021 | 0.54424775 | 0.78623679 |
| Rbm39      | 31418.297  | -0.2223166 | 0.17533643 | -1.2679433 | 0.2048182  | 0.49017049 |
| Rassf5     | 82.2387635 | -0.2224148 | 0.4192824  | -0.5304653 | 0.59578933 | 0.81869046 |
| Ercc6l     | 5726.05307 | -0.2224538 | 0.17781973 | -1.2510074 | 0.2109318  | 0.49778092 |
| Tmed10     | 6324.53187 | -0.2226305 | 0.1756925  | -1.2671602 | 0.205098   | 0.4903111  |
| Wdr59      | 3136.97412 | -0.222772  | 0.21176051 | -1.0519995 | 0.29279978 | 0.5865425  |
| Klhl12     | 3623.40507 | -0.2227914 | 0.16539465 | -1.3470292 | 0.17797082 | 0.45557599 |

|             |            |            |            |            |            |            |
|-------------|------------|------------|------------|------------|------------|------------|
| Myo18b      | 377.231296 | -0.2228058 | 0.37953501 | -0.5870493 | 0.55717058 | 0.79586293 |
| Ccdc162     | 51.1400226 | -0.222933  | 0.36164191 | -0.6164468 | 0.53759969 | 0.78132829 |
| Akap12      | 64858.8095 | -0.2232596 | 0.22621851 | -0.9869203 | 0.32368171 | 0.61837521 |
| Cables2     | 1033.46808 | -0.2233232 | 0.18298111 | -1.2204714 | 0.22228621 | 0.51090346 |
| Etv1        | 362.274589 | -0.2233458 | 0.39933602 | -0.5592929 | 0.57596182 | 0.80734073 |
| Proz        | 5.4415021  | -0.2234804 | 0.3934482  | -0.5680048 | 0.57003174 | NA         |
| Zfp429      | 359.85131  | -0.2235018 | 0.424268   | -0.5267939 | 0.59833671 | 0.81984777 |
| Eif2s2      | 81565.7051 | -0.2236938 | 0.19834113 | -1.1278238 | 0.25939435 | 0.55144791 |
| Shmt2       | 13622.4879 | -0.2237797 | 0.21036939 | -1.0637467 | 0.28744345 | 0.58090099 |
| Magea4      | 140.738578 | -0.2238171 | 0.34811722 | -0.6429362 | 0.52026553 | 0.76986886 |
| Rnaseh2a    | 6100.21354 | -0.224121  | 0.2206922  | -1.0155365 | 0.30985016 | 0.60461696 |
| Sult1a1     | 87.9308676 | -0.2241852 | 0.40482225 | -0.5537868 | 0.57972474 | 0.80831465 |
| Lrch1       | 2182.52447 | -0.2242937 | 0.20012708 | -1.1207565 | 0.26239154 | 0.55478597 |
| Rbm25       | 21456.0753 | -0.2242952 | 0.18739226 | -1.1969286 | 0.23133437 | 0.52296566 |
| Tssk3       | 3.50060411 | -0.2243269 | 0.38248068 | -0.5865052 | 0.55753608 | NA         |
| Zpr1        | 5387.20438 | -0.2243891 | 0.16021897 | -1.400515  | 0.16135917 | 0.43228454 |
| Lyz2        | 1.21925005 | -0.2243967 | 0.26034671 | -0.861915  | 0.38873428 | NA         |
| Esy2        | 4960.94286 | -0.2244101 | 0.20562087 | -1.0913781 | 0.27510653 | 0.5675013  |
| Gkap1       | 1843.49498 | -0.2246515 | 0.19053941 | -1.1790291 | 0.23838659 | 0.53042636 |
| Fnbp4       | 8184.63576 | -0.2246641 | 0.1745841  | -1.2868533 | 0.19814541 | 0.4811611  |
| Pomk        | 1582.14627 | -0.2246975 | 0.23289959 | -0.9647827 | 0.33465368 | 0.6276926  |
| Tcerg1      | 12889.3957 | -0.2247264 | 0.2361551  | -0.9516052 | 0.34129724 | 0.63466932 |
| Wbscr16     | 1870.12922 | -0.2247794 | 0.16713512 | -1.3448962 | 0.17865875 | 0.45666046 |
| Negr1       | 6.13562558 | -0.2248145 | 0.37907588 | -0.5930595 | 0.55314135 | 0.79221782 |
| Cwc15       | 6560.72992 | -0.2249922 | 0.16029154 | -1.4036439 | 0.16042492 | 0.43177016 |
| Mrpl2       | 4430.33363 | -0.2250714 | 0.19364339 | -1.1622985 | 0.24511422 | 0.537854   |
| Celf5       | 740.816593 | -0.2251367 | 0.22092584 | -1.0190602 | 0.30817437 | 0.60283181 |
| Rsl1d1      | 29543.0293 | -0.2251669 | 0.17543494 | -1.2834779 | 0.19932471 | 0.48250548 |
| 4933427D14I | 1331.26662 | -0.2252007 | 0.24287433 | -0.9272312 | 0.35380652 | 0.64527848 |
| Prap1       | 41.4101488 | -0.2252221 | 0.41627116 | -0.5410465 | 0.58847554 | 0.81419144 |
| Myh9        | 29073.8443 | -0.2252445 | 0.20414898 | -1.1033339 | 0.26988219 | 0.56289403 |
| Cpsf3       | 10061.4133 | -0.2252487 | 0.16890136 | -1.3336109 | 0.18233141 | 0.46179736 |
| Sowaha      | 48.840079  | -0.2252821 | 0.42298659 | -0.5325987 | 0.59431141 | 0.81778194 |
| Agtr1a      | 2.81344686 | -0.2253525 | 0.29716696 | -0.7583362 | 0.44824971 | NA         |
| Tor1b       | 3084.0943  | -0.2254189 | 0.16567343 | -1.3606218 | 0.17363325 | 0.45100512 |
| Tmpo        | 21647.2727 | -0.2255534 | 0.17345657 | -1.3003449 | 0.19348278 | 0.47612768 |
| Nedd4       | 114253.359 | -0.2255752 | 0.20511554 | -1.0997471 | 0.27144232 | 0.56501132 |
| Usp15       | 9226.07374 | -0.2255759 | 0.15792253 | -1.4283959 | 0.15317794 | 0.42100922 |
| Nkiras2     | 2634.21125 | -0.2256334 | 0.20176579 | -1.1182937 | 0.26344158 | 0.55541671 |
| Fermt2      | 9198.52755 | -0.2256658 | 0.16817778 | -1.341829  | 0.17965145 | 0.45797246 |
| Cap1        | 13684.4675 | -0.2256742 | 0.16891451 | -1.3360261 | 0.18154073 | 0.46060561 |

|          |            |            |            |            |            |            |
|----------|------------|------------|------------|------------|------------|------------|
| Ak2      | 16256.3425 | -0.2256968 | 0.16816706 | -1.3420989 | 0.17956393 | 0.45784532 |
| Metrn    | 1017.73509 | -0.2257088 | 0.31651668 | -0.7131025 | 0.47578232 | 0.74133857 |
| Snapc4   | 2392.52712 | -0.2258064 | 0.19198776 | -1.1761502 | 0.23953487 | 0.53153636 |
| Dctn4    | 4138.70292 | -0.2260035 | 0.1918806  | -1.177834  | 0.23886278 | 0.53094189 |
| Nkap     | 2497.7485  | -0.2260215 | 0.18297599 | -1.2352525 | 0.21673655 | 0.50410859 |
| Erich1   | 1820.90736 | -0.2262571 | 0.17636747 | -1.2828731 | 0.19953654 | 0.48250548 |
| Baiap2   | 1295.60664 | -0.2264003 | 0.26841845 | -0.8434604 | 0.398971   | 0.68473657 |
| N4bp2l2  | 6702.55646 | -0.2264396 | 0.15049706 | -1.5046118 | 0.13242391 | 0.38877972 |
| Rhoa     | 19126.6724 | -0.2264877 | 0.14978684 | -1.5120668 | 0.13051688 | 0.38645621 |
| Tsku     | 702.419251 | -0.2264885 | 0.19971167 | -1.1340774 | 0.25676209 | 0.54991148 |
| Napb     | 436.775974 | -0.2265147 | 0.30609453 | -0.7400154 | 0.45929067 | 0.72986186 |
| Tonsl    | 3176.2176  | -0.2266363 | 0.20912175 | -1.0837527 | 0.27847447 | 0.57075699 |
| Fbxo11   | 4786.58549 | -0.2268238 | 0.18269578 | -1.241538  | 0.21440705 | 0.50150668 |
| Enoph1   | 5425.39378 | -0.2268328 | 0.19833222 | -1.1437012 | 0.25274757 | 0.54598821 |
| Cct2     | 54104.5962 | -0.2268656 | 0.15864242 | -1.4300436 | 0.1527045  | 0.42030588 |
| Erc8     | 1270.78402 | -0.2269305 | 0.19264857 | -1.1779506 | 0.23881632 | 0.53094189 |
| Mir684-1 | 17.243045  | -0.2269529 | 0.42677256 | -0.5317889 | 0.59487221 | 0.81794822 |
| Cenpo    | 1626.272   | -0.2270761 | 0.17914132 | -1.267581  | 0.20494762 | 0.49027741 |
| Cep170b  | 3350.3706  | -0.2272418 | 0.20739014 | -1.0957215 | 0.27320067 | 0.56626801 |
| Actr3b   | 1090.47129 | -0.2272599 | 0.32886182 | -0.6910497 | 0.48953432 | 0.75067166 |
| Hiatl1   | 4634.55723 | -0.2274644 | 0.17259847 | -1.3178816 | 0.18754328 | 0.46888835 |
| Gmps     | 11545.0426 | -0.2274791 | 0.15855241 | -1.434725  | 0.15136547 | 0.41846833 |
| Rab5b    | 3000.0599  | -0.2274838 | 0.18726205 | -1.2147885 | 0.22444676 | 0.51368924 |
| Mthfd2   | 9349.35314 | -0.2275213 | 0.19347985 | -1.1759433 | 0.23961754 | 0.53163981 |
| Ranbp17  | 5222.03276 | -0.2275612 | 0.22926023 | -0.992589  | 0.32091031 | 0.61489356 |
| Zfp960   | 1441.42687 | -0.227697  | 0.19287025 | -1.1805709 | 0.23777322 | 0.52993576 |
| Nme7     | 3415.83312 | -0.2277027 | 0.22643347 | -1.0056051 | 0.31460556 | 0.60919325 |
| Pcsk2    | 4.61218726 | -0.2278222 | 0.39497801 | -0.5767972 | 0.56407649 | NA         |
| Ttbk2    | 1828.72891 | -0.2278349 | 0.24512677 | -0.9294577 | 0.35265196 | 0.64439796 |
| Herc3    | 2126.08262 | -0.2278674 | 0.18529472 | -1.2297568 | 0.2187882  | 0.50706041 |
| Socs7    | 2830.45348 | -0.2278729 | 0.23324829 | -0.9769541 | 0.32859189 | 0.62221988 |
| Siglecg  | 12.3082184 | -0.2278739 | 0.40399793 | -0.5640472 | 0.57272198 | 0.80615492 |
| Cxxc1    | 2432.48602 | -0.2279435 | 0.19319725 | -1.1798484 | 0.23806052 | 0.53000416 |
| Tal2     | 14.9786911 | -0.2279588 | 0.40537432 | -0.5623415 | 0.57388336 | 0.80652888 |
| Tagap1   | 1064.56671 | -0.2282026 | 0.43139697 | -0.5289851 | 0.59681577 | 0.81955304 |
| lqcc     | 1175.66212 | -0.2283003 | 0.18777123 | -1.2158431 | 0.22404471 | 0.51323805 |
| Zmynd11  | 2612.7542  | -0.2284331 | 0.19832342 | -1.1518213 | 0.24939453 | 0.54295595 |
| Lace1    | 1503.68878 | -0.2285006 | 0.16311546 | -1.4008516 | 0.16125847 | 0.43227306 |
| Oxsr1    | 10778.657  | -0.228535  | 0.15784595 | -1.4478357 | 0.14766301 | 0.41238389 |
| Nek7     | 2041.51543 | -0.2285514 | 0.22723121 | -1.0058097 | 0.31450713 | 0.60909583 |
| Armcx4   | 2274.95401 | -0.2286348 | 0.23961046 | -0.9541938 | 0.33998553 | 0.633415   |



|            |            |            |            |            |            |            |
|------------|------------|------------|------------|------------|------------|------------|
| Rps17      | 34643.2867 | -0.2287997 | 0.21083373 | -1.0852138 | 0.27782697 | 0.5702108  |
| lsg20l2    | 7241.07705 | -0.228835  | 0.19295431 | -1.1859542 | 0.23564037 | 0.52749347 |
| Fem1b      | 20378.4618 | -0.2288681 | 0.24294208 | -0.9420684 | 0.34615761 | 0.63818578 |
| Vps39      | 3541.99456 | -0.22901   | 0.22254905 | -1.0290316 | 0.30346482 | 0.59850576 |
| Efna2      | 470.367701 | -0.2291246 | 0.22562876 | -1.0154937 | 0.30987056 | 0.60461696 |
| Reep6      | 828.452577 | -0.2292217 | 0.22025299 | -1.0407199 | 0.29800555 | 0.59246795 |
| Sowahb     | 352.360636 | -0.2292306 | 0.23763472 | -0.9646343 | 0.33472801 | 0.62775631 |
| Susd2      | 2467.13678 | -0.2294201 | 0.31783321 | -0.7218254 | 0.47040182 | 0.73788201 |
| Adnp       | 9885.10866 | -0.229429  | 0.20977975 | -1.0936662 | 0.2741014  | 0.56692432 |
| Glg1       | 8910.69281 | -0.2294697 | 0.28026709 | -0.8187535 | 0.41292706 | 0.69515344 |
| Zfp420     | 683.323872 | -0.2295289 | 0.21302191 | -1.0774897 | 0.28126155 | 0.5734756  |
| Nr2c2      | 3233.82089 | -0.2295375 | 0.24105628 | -0.9522156 | 0.34098767 | 0.63459781 |
| Ppargc1b   | 417.602003 | -0.2295539 | 0.25173867 | -0.9118739 | 0.36183512 | 0.65254528 |
| Ccdc93     | 3876.88718 | -0.2299386 | 0.24963433 | -0.9211018 | 0.35699729 | 0.64810471 |
| Csgalnact2 | 1043.89725 | -0.2299625 | 0.22350066 | -1.0289121 | 0.30352099 | 0.59850576 |
| Tbc1d31    | 2798.38593 | -0.229976  | 0.15903374 | -1.4460831 | 0.14815391 | 0.41304077 |
| Mlxip      | 1715.00904 | -0.2299764 | 0.22709583 | -1.0126845 | 0.3112109  | 0.60586388 |
| Cyp2c44    | 37.9885181 | -0.230008  | 0.42597918 | -0.5399513 | 0.5892306  | 0.81457242 |
| Nlgn2      | 1953.00535 | -0.2300694 | 0.2308541  | -0.996601  | 0.31895822 | 0.61284294 |
| Ppp1r26    | 1044.84791 | -0.2301037 | 0.27944763 | -0.8234232 | 0.41026735 | 0.69309338 |
| Wipf2      | 2823.66965 | -0.2301831 | 0.20700805 | -1.1119525 | 0.26615857 | 0.55842308 |
| Mtcp1      | 353.70693  | -0.2302357 | 0.26191919 | -0.8790334 | 0.37938319 | 0.66837974 |
| 1700123M08 | 13.4665956 | -0.2303655 | 0.43121144 | -0.5342286 | 0.59318339 | 0.81705522 |
| Glod4      | 6842.39533 | -0.2304133 | 0.15904721 | -1.4487098 | 0.14741865 | 0.41204462 |
| Xpo1       | 53224.7343 | -0.2304835 | 0.16279513 | -1.4157884 | 0.15683746 | 0.42609701 |
| Als2cr12   | 5.74715441 | -0.2305669 | 0.38913471 | -0.5925118 | 0.55350794 | NA         |
| Wfdc8      | 0.99161433 | -0.2307149 | 0.22664405 | -1.0179613 | 0.30869636 | NA         |
| lisy1      | 3956.93724 | -0.2307312 | 0.1852424  | -1.2455638 | 0.2129246  | 0.4996189  |
| Mvd        | 3232.84728 | -0.2307615 | 0.18636071 | -1.2382521 | 0.21562261 | 0.5027617  |
| Ube2t      | 3331.96602 | -0.2308864 | 0.23179553 | -0.9960781 | 0.31921221 | 0.61303091 |
| Sema3e     | 65.6960286 | -0.2308944 | 0.41719403 | -0.5534462 | 0.57995792 | 0.80836476 |
| Morc2a     | 8945.13415 | -0.2309564 | 0.2362836  | -0.9774543 | 0.32834427 | 0.62193444 |
| Snx24      | 396.153986 | -0.2310854 | 0.24883757 | -0.9286594 | 0.35306561 | 0.64466039 |
| Arfgap3    | 1693.48613 | -0.2311259 | 0.17821966 | -1.2968595 | 0.19467952 | 0.4775284  |
| Hsf2       | 4503.58129 | -0.2311587 | 0.14894781 | -1.5519445 | 0.1206755  | 0.36940975 |
| lft52      | 4983.4157  | -0.2311964 | 0.16843742 | -1.372595  | 0.16987828 | 0.44511837 |
| Xlr3a      | 3365.79641 | -0.2312708 | 0.33200469 | -0.6965889 | 0.48606012 | 0.7479571  |
| Rpl14      | 65984.9665 | -0.2313167 | 0.18510349 | -1.2496614 | 0.21142328 | 0.49812885 |
| Gtf2a1l    | 7.76431585 | -0.2314665 | 0.42285053 | -0.5473956 | 0.58410698 | 0.81141028 |
| Luzp1      | 8550.15123 | -0.2315259 | 0.21265134 | -1.0887584 | 0.27626046 | 0.56872206 |
| Ears2      | 1352.81552 | -0.2315264 | 0.19337858 | -1.1972703 | 0.2312012  | 0.52281662 |

|             |            |            |            |            |            |            |
|-------------|------------|------------|------------|------------|------------|------------|
| Cyp4f15     | 2.56478852 | -0.2316018 | 0.25707964 | -0.9008951 | 0.36764409 | NA         |
| Btnl5-ps    | 2.33992728 | -0.2316143 | 0.28963474 | -0.7996771 | 0.42389793 | NA         |
| Ap1g1       | 10881.3528 | -0.2316493 | 0.24311265 | -0.9528477 | 0.34066724 | 0.63407735 |
| Ate1        | 3829.44849 | -0.2316508 | 0.16787999 | -1.3798595 | 0.1676299  | 0.44250765 |
| Cxcl10      | 5.43434568 | -0.2319516 | 0.37531602 | -0.6180169 | 0.53656421 | NA         |
| Brinp3      | 81.4941216 | -0.2319622 | 0.36360869 | -0.6379447 | NA         | NA         |
| Snord71     | 2.4558397  | -0.2321383 | 0.28623195 | -0.8110146 | 0.41735729 | NA         |
| St8sia5     | 100.031511 | -0.23214   | 0.34721618 | -0.6685748 | NA         | NA         |
| Lmnb2       | 5562.72024 | -0.2322786 | 0.2120167  | -1.0955676 | 0.27326804 | 0.56626801 |
| Hrg         | 4.42876614 | -0.2322833 | 0.35707394 | -0.6505189 | 0.51535711 | NA         |
| Cd44        | 35.1094404 | -0.2323796 | 0.42877499 | -0.5419616 | 0.58784498 | 0.81353146 |
| Git2        | 3995.29153 | -0.2324652 | 0.20791261 | -1.1180909 | 0.26352818 | 0.55541671 |
| Scaf4       | 3810.32172 | -0.2325029 | 0.23538597 | -0.9877518 | 0.32327421 | 0.61782442 |
| Cul4a       | 4590.71065 | -0.232508  | 0.19319914 | -1.2034629 | 0.22879724 | 0.51962142 |
| Zzz3        | 6332.61119 | -0.2325304 | 0.18941802 | -1.2276045 | 0.21959549 | 0.50805484 |
| Fgl2        | 94.3299442 | -0.2325951 | 0.34358226 | -0.6769706 | 0.49842463 | 0.75671204 |
| Gsc2        | 21.0941951 | -0.232601  | 0.42876369 | -0.5424922 | 0.58747948 | 0.81340776 |
| Ero1lb      | 301.560933 | -0.2326046 | 0.27411187 | -0.8485754 | 0.39611759 | 0.68292956 |
| Nus1        | 7521.43893 | -0.2326858 | 0.17096815 | -1.3609894 | 0.17351704 | 0.45092973 |
| Myef2       | 12275.4314 | -0.2327262 | 0.14761994 | -1.5765229 | 0.11490535 | 0.359753   |
| Frs3        | 798.56404  | -0.2328225 | 0.20083005 | -1.159301  | 0.24633353 | 0.53945517 |
| Ssu2        | 2.80632951 | -0.232861  | 0.33273825 | -0.6998323 | 0.48403204 | NA         |
| Cyc1        | 13116.514  | -0.2328669 | 0.15450036 | -1.5072253 | 0.13175292 | 0.38823237 |
| Mnat1       | 4372.08138 | -0.2329691 | 0.18953502 | -1.2291611 | 0.21901142 | 0.50750211 |
| Mrps35      | 3314.50354 | -0.2330405 | 0.17050799 | -1.3667423 | 0.17170608 | 0.4479452  |
| Ddx1        | 18050.823  | -0.2331308 | 0.1458231  | -1.5987234 | 0.10988209 | 0.35030265 |
| Abcc5       | 14377.7661 | -0.2331354 | 0.16625821 | -1.4022491 | 0.16084089 | 0.43208565 |
| Kdm6a       | 4838.93834 | -0.233156  | 0.22731556 | -1.025693  | 0.30503631 | 0.59969907 |
| Calb1       | 2.55841867 | -0.2332809 | 0.34607661 | -0.6740731 | 0.50026486 | NA         |
| Calm3       | 15089.0246 | -0.2332916 | 0.17892734 | -1.303834  | 0.19229018 | 0.4751259  |
| Greb1l      | 183.493686 | -0.2333215 | 0.39644101 | -0.5885404 | 0.55616966 | 0.7952367  |
| Iscu        | 1485.0264  | -0.233388  | 0.16614024 | -1.4047649 | 0.16009119 | 0.43144633 |
| 4833403115R | 24.4732182 | -0.2336608 | 0.40612943 | -0.5753359 | 0.56506417 | 0.80125038 |
| Idh3a       | 13320.0064 | -0.2336677 | 0.1663255  | -1.404882  | 0.16005638 | 0.43144633 |
| Pstk        | 1975.83472 | -0.2337021 | 0.20925084 | -1.1168513 | 0.2640579  | 0.55578402 |
| Scamp4      | 2799.1755  | -0.2337133 | 0.20450122 | -1.1428454 | 0.2531028  | 0.54607863 |
| Gfi1b       | 3.03036232 | -0.2337991 | 0.31391332 | -0.7447886 | 0.45639951 | NA         |
| Fam83c      | 2.06673834 | -0.2339805 | 0.2723549  | -0.8591015 | 0.39028453 | NA         |
| Serpina7    | 21.8054781 | -0.234191  | 0.41841216 | -0.5597136 | 0.57567481 | 0.80714793 |
| Hykk        | 499.387108 | -0.234227  | 0.2282679  | -1.0261057 | 0.30484175 | 0.59961979 |
| Sctr        | 3.23283116 | -0.2343715 | 0.36687948 | -0.6388241 | 0.52293735 | NA         |

|             |            |            |            |            |            |            |
|-------------|------------|------------|------------|------------|------------|------------|
| Trmt112     | 1095.25749 | -0.2344846 | 0.21099477 | -1.1113292 | 0.26642667 | 0.55868408 |
| Nat8        | 2.78139284 | -0.23463   | 0.36423279 | -0.6441759 | 0.51946138 | NA         |
| Vcpip1      | 2986.30561 | -0.2346333 | 0.23009406 | -1.0197279 | 0.30785751 | 0.60273097 |
| Zfp58       | 901.522198 | -0.2346474 | 0.21272948 | -1.1030319 | 0.2700133  | 0.56309198 |
| Upk1a       | 221.010064 | -0.2347134 | 0.30074036 | -0.7804521 | 0.43512483 | 0.70936432 |
| Cnbp        | 51913.5872 | -0.2348379 | 0.19362822 | -1.2128289 | 0.22519524 | 0.51458839 |
| Slc31a2     | 721.519793 | -0.2348497 | 0.22521466 | -1.0427816 | 0.29704946 | 0.59139882 |
| Vdac2       | 22931.3401 | -0.234906  | 0.15336127 | -1.5317166 | 0.12559238 | 0.37885621 |
| Dvl2        | 5572.77961 | -0.2350699 | 0.19671882 | -1.1949538 | 0.23210509 | 0.52371825 |
| Tead1       | 12186.385  | -0.2351138 | 0.24001296 | -0.9795881 | 0.32728949 | 0.6205412  |
| Zbtb39      | 1850.32602 | -0.2351847 | 0.25031799 | -0.9395438 | 0.34745161 | 0.63979142 |
| Orc3        | 7988.7814  | -0.2352253 | 0.20285578 | -1.159569  | 0.24622434 | 0.53945262 |
| Slc2a12     | 12.6555484 | -0.2352482 | 0.40378181 | -0.5826122 | 0.56015436 | 0.79814554 |
| Mir6991     | 3.23738067 | -0.2352705 | 0.37594886 | -0.6258045 | 0.5314432  | NA         |
| Mgst1       | 14.2267671 | -0.2353222 | 0.42754785 | -0.5503997 | 0.58204528 | 0.81000763 |
| Camsap3     | 4622.21476 | -0.2353981 | 0.29254232 | -0.8046633 | 0.42101401 | 0.70091929 |
| Pqlc3       | 2518.52024 | -0.2354337 | 0.20126826 | -1.1697509 | 0.24210124 | 0.53454646 |
| Aco2        | 26077.4232 | -0.2355367 | 0.15971023 | -1.474775  | 0.14027304 | 0.40038397 |
| Zfp11       | 404.495186 | -0.2356082 | 0.20827711 | -1.1312247 | 0.25796051 | 0.55043138 |
| Scarna8     | 4.83364896 | -0.2356085 | 0.39212257 | -0.6008542 | 0.54793711 | NA         |
| Rps5        | 91662.9456 | -0.2358677 | 0.20606723 | -1.1446153 | 0.25236854 | 0.54598821 |
| Fam43b      | 28.244868  | -0.2358897 | 0.42679603 | -0.552699  | 0.58046953 | 0.80865954 |
| Tmem176a    | 12.4724959 | -0.2358973 | 0.4197892  | -0.5619423 | 0.57415532 | 0.80656634 |
| Gm13139     | 561.150181 | -0.2359992 | 0.27633468 | -0.854034  | 0.39308612 | 0.6808735  |
| Grid2       | 70.0373985 | -0.2363375 | 0.3298122  | -0.716582  | 0.47363206 | 0.73992114 |
| Unc5d       | 7.2170708  | -0.236352  | 0.39833771 | -0.5933457 | 0.55294983 | 0.79208943 |
| Prkab2      | 1552.30404 | -0.2363637 | 0.21106369 | -1.1198689 | 0.26276965 | 0.55510278 |
| Rps15a-ps4  | 16.4976744 | -0.2363659 | 0.4248283  | -0.5563797 | 0.5779513  | 0.80768356 |
| Ints8       | 7983.26297 | -0.2363722 | 0.15098785 | -1.5655047 | 0.11746462 | 0.36401527 |
| Dhx9        | 48608.3899 | -0.2363804 | 0.20737998 | -1.1398418 | 0.25435221 | 0.54746454 |
| Zbtb8a      | 3209.18375 | -0.2364704 | 0.17812884 | -1.3275244 | 0.18433528 | 0.4644599  |
| Hnrnp11     | 7369.48085 | -0.2364985 | 0.20860474 | -1.1337161 | 0.25691365 | 0.54993313 |
| Dnah2       | 256.22401  | -0.2365523 | 0.30763278 | -0.7689437 | 0.44192675 | 0.71572619 |
| Cd96        | 2.75953209 | -0.2366001 | 0.33106986 | -0.714653  | 0.47482346 | NA         |
| Rab8a       | 6314.27987 | -0.2366305 | 0.22403784 | -1.0562076 | 0.29087337 | 0.58476633 |
| Tmem161a    | 2090.71084 | -0.2366422 | 0.21766495 | -1.0871857 | 0.27695477 | 0.56941395 |
| 4932438H23I | 2.2794647  | -0.2366505 | 0.32351676 | -0.7314937 | 0.46447766 | NA         |
| Fancd2os    | 30.563358  | -0.2366784 | 0.41770091 | -0.5666216 | 0.57097127 | 0.80514818 |
| Zkscan1     | 1799.43923 | -0.2366789 | 0.1760343  | -1.3445046 | 0.17878526 | 0.45690873 |
| Mir17hg     | 3290.75979 | -0.2366838 | 0.27899332 | -0.8483493 | 0.39624348 | 0.6829437  |
| Rps6kb1     | 4963.8516  | -0.2367196 | 0.20668109 | -1.1453377 | 0.25206931 | 0.5457992  |

|             |            |            |            |            |            |            |
|-------------|------------|------------|------------|------------|------------|------------|
| Hyal3       | 98.2151411 | -0.23673   | 0.36870726 | -0.642054  | 0.52083813 | 0.76986886 |
| Cyyr1       | 10.0129028 | -0.2368045 | 0.42811325 | -0.5531351 | 0.58017087 | 0.80851664 |
| Lig4        | 1256.27227 | -0.2371185 | 0.20468588 | -1.1584505 | 0.24668025 | 0.53953931 |
| Dot1l       | 5233.70862 | -0.2371608 | 0.25773338 | -0.9201789 | 0.35747927 | 0.64865412 |
| Ddx23       | 9101.27046 | -0.2372298 | 0.20688352 | -1.1466829 | 0.25151272 | 0.5450894  |
| Sspo        | 27.9693759 | -0.2374151 | 0.4177932  | -0.5682599 | 0.56985847 | 0.80449796 |
| Slc22a21    | 110.757494 | -0.2374251 | 0.30855749 | -0.769468  | 0.44161553 | 0.71556426 |
| Bmpr1b      | 11.2313062 | -0.2374357 | 0.42723834 | -0.5557452 | 0.57838502 | 0.8077652  |
| Pax5        | 2.68624463 | -0.2374576 | 0.33303612 | -0.7130085 | 0.47584049 | NA         |
| Tti2        | 1720.15693 | -0.237458  | 0.16930199 | -1.4025706 | 0.16074493 | 0.43208565 |
| Cd9         | 26368.7033 | -0.2375937 | 0.22276948 | -1.0665453 | 0.28617722 | 0.57932075 |
| Mbtps1      | 12023.1309 | -0.2376994 | 0.23484848 | -1.0121394 | 0.3114714  | 0.60614337 |
| Dennd6a     | 3768.64872 | -0.237889  | 0.19421388 | -1.2248817 | 0.2206198  | 0.50895393 |
| Metap2      | 19104.6761 | -0.2379726 | 0.15735871 | -1.5122935 | 0.13045921 | 0.3864326  |
| Zfp819      | 1769.86426 | -0.2380562 | 0.25649432 | -0.928115  | 0.35334794 | 0.6449764  |
| Mrgbp       | 875.17138  | -0.2381283 | 0.20595813 | -1.1561974 | 0.24760042 | 0.5407913  |
| Fbl         | 7445.05176 | -0.2381887 | 0.169987   | -1.401217  | 0.1611492  | 0.43222339 |
| Clk2        | 3819.75512 | -0.2383956 | 0.17010321 | -1.4014762 | 0.16107171 | 0.43209007 |
| Ccdc47      | 7548.05966 | -0.2384304 | 0.20977194 | -1.1366173 | 0.25569828 | 0.54856501 |
| 1700026L06F | 19.7347502 | -0.2384805 | 0.42711561 | -0.5583512 | 0.57660458 | 0.80734073 |
| Gucy1b3     | 14.9957045 | -0.2384831 | 0.42715    | -0.5583123 | 0.57663116 | 0.80734073 |
| Hn1         | 7023.4024  | -0.2385978 | 0.20950727 | -1.138852  | 0.25476489 | 0.54792838 |
| Arl2        | 1403.24347 | -0.2386081 | 0.22133749 | -1.0780285 | 0.28102102 | 0.57306031 |
| Suv39h2     | 3162.49014 | -0.2386484 | 0.16429731 | -1.45254   | 0.14635151 | 0.41037007 |
| Hsd17b6     | 2.89657917 | -0.2386951 | 0.36393328 | -0.655876  | 0.51190392 | NA         |
| Ctnna2      | 10.8996323 | -0.2387175 | 0.43204447 | -0.5525298 | 0.58058541 | 0.80865954 |
| Hist1h2bg   | 3.00469956 | -0.2387458 | 0.34572112 | -0.6905735 | 0.4898336  | NA         |
| Rwdd1       | 2916.71403 | -0.2388413 | 0.16908674 | -1.4125373 | 0.15779181 | 0.42767192 |
| Mtmr3       | 5578.30511 | -0.2389796 | 0.19343691 | -1.2354395 | 0.21666699 | 0.5040222  |
| Aftph       | 4226.83645 | -0.2391632 | 0.17712209 | -1.3502731 | 0.17692838 | 0.45462404 |
| Fam210b     | 740.600639 | -0.239224  | 0.19674447 | -1.2159122 | 0.22401839 | 0.51323805 |
| Skiv2l2     | 13896.1794 | -0.2393538 | 0.1750911  | -1.3670242 | 0.17161772 | 0.4479452  |
| Ppie        | 3765.60449 | -0.2394832 | 0.21614618 | -1.1079687 | 0.26787532 | 0.5606634  |
| Agfg1       | 9932.81849 | -0.239742  | 0.18828821 | -1.2732714 | 0.20292174 | 0.48733798 |
| Zfp935      | 980.457957 | -0.2398338 | 0.24831494 | -0.9658452 | 0.33412165 | 0.62729999 |
| Fam122c     | 3.96940116 | -0.2401662 | 0.33335136 | -0.7204597 | 0.47124201 | NA         |
| Dcun1d1     | 1263.93965 | -0.2401885 | 0.19738169 | -1.216873  | 0.22365253 | 0.51290671 |
| Gm7788      | 2.16105811 | -0.2402309 | 0.33926921 | -0.7080834 | 0.47889348 | NA         |
| 6030408B16F | 1.05785809 | -0.240255  | 0.230622   | -1.0417696 | 0.29751851 | NA         |
| Parg        | 7082.70974 | -0.2402969 | 0.16087974 | -1.4936427 | 0.13526903 | 0.39297005 |
| Cd207       | 2.45501126 | -0.2403057 | 0.31783869 | -0.7560619 | 0.44961207 | NA         |

|             |            |            |            |            |            |            |
|-------------|------------|------------|------------|------------|------------|------------|
| Haus5       | 1757.92526 | -0.2403778 | 0.19321909 | -1.2440684 | 0.2134744  | 0.50028431 |
| Sart1       | 6045.60793 | -0.2404566 | 0.21002383 | -1.1449016 | 0.25224993 | 0.54598821 |
| Ctso        | 11.8205589 | -0.2404983 | 0.43163676 | -0.5571775 | 0.57740619 | 0.80734073 |
| Gata1       | 31.8969805 | -0.2407712 | 0.43198543 | -0.5573595 | 0.57728185 | 0.80734073 |
| Has3        | 169.575843 | -0.2407878 | 0.42420052 | -0.5676273 | 0.57028803 | 0.80487644 |
| Tor2a       | 1547.62661 | -0.240811  | 0.20529866 | -1.172979  | 0.24080424 | 0.53306004 |
| Dak         | 1746.95459 | -0.2408506 | 0.19807334 | -1.2159669 | 0.22399753 | 0.51323805 |
| Hist1h2bm   | 2.00719927 | -0.2409504 | 0.31247378 | -0.7711061 | 0.44064407 | NA         |
| Tgds        | 1642.78871 | -0.2410972 | 0.24873553 | -0.9692912 | 0.33239991 | 0.62580521 |
| Uhrf2       | 3450.0523  | -0.2412282 | 0.2126778  | -1.1342424 | 0.25669287 | 0.54983895 |
| Chchd6      | 758.307749 | -0.2412341 | 0.22934603 | -1.0518347 | 0.2928754  | 0.5866184  |
| Cops2       | 15793.3365 | -0.2413454 | 0.17881151 | -1.3497195 | 0.17710597 | 0.45462566 |
| Ei24        | 14472.1178 | -0.2413551 | 0.18870653 | -1.2789971 | 0.20089809 | 0.48466741 |
| Ntrk3       | 262.396561 | -0.2414804 | 0.26848465 | -0.8994199 | 0.36842905 | 0.65878874 |
| Pnck        | 243.842894 | -0.2415174 | 0.33272191 | -0.7258837 | 0.46791009 | 0.73603782 |
| Ppp1r12c    | 3109.74641 | -0.2415608 | 0.17914365 | -1.3484195 | 0.17752351 | 0.45503018 |
| Gnpnat1     | 4125.29731 | -0.2415955 | 0.17328599 | -1.3942009 | 0.16325695 | 0.43524923 |
| Clasp2      | 7285.82691 | -0.2416093 | 0.21189562 | -1.1402279 | 0.25419138 | 0.54726985 |
| Wbscr27     | 1048.54383 | -0.2416558 | 0.22380651 | -1.0797533 | 0.28025206 | 0.57238395 |
| Dtx2        | 1615.92109 | -0.2416859 | 0.17983127 | -1.3439592 | 0.17896159 | 0.45698386 |
| Usp38       | 4621.61103 | -0.2417838 | 0.22339905 | -1.0822955 | 0.27912125 | 0.57150949 |
| Bmpr1a      | 7738.03603 | -0.2418158 | 0.20492102 | -1.1800437 | 0.23798283 | 0.52998296 |
| Cyp2c53-ps  | 12.1010417 | -0.2420494 | 0.3840692  | -0.6302233 | 0.52854851 | 0.77562901 |
| Lig1        | 22972.7113 | -0.2420828 | 0.19873426 | -1.2181234 | 0.22317708 | 0.51226511 |
| N4bp1       | 12347.8433 | -0.2421715 | 0.22825138 | -1.0609861 | 0.2886962  | 0.58216601 |
| Usp36       | 3388.11576 | -0.2423422 | 0.19949359 | -1.2147867 | 0.22444745 | 0.51368924 |
| Akp3        | 3.19295283 | -0.2423528 | 0.37755121 | -0.6419071 | 0.52093353 | NA         |
| Snn         | 929.594431 | -0.2424056 | 0.27267657 | -0.888986  | 0.37401061 | 0.66357547 |
| Mprip       | 7813.40886 | -0.2424359 | 0.18221787 | -1.3304725 | 0.18336263 | 0.46357864 |
| Ofd1        | 2850.8374  | -0.2424895 | 0.17775745 | -1.3641594 | 0.17251742 | 0.44946602 |
| Exosc9      | 6555.32945 | -0.2424914 | 0.20785968 | -1.1666112 | 0.24336743 | 0.53577799 |
| Snord70     | 10.8069327 | -0.2425295 | 0.43109869 | -0.5625847 | 0.57371775 | 0.80652888 |
| 9430008C03F | 2695.0517  | -0.24253   | 0.18998212 | -1.276594  | 0.20174563 | 0.48618414 |
| Axin1       | 4711.07224 | -0.2425894 | 0.1706898  | -1.4212298 | 0.15524996 | 0.4237087  |
| Tnks1bp1    | 3065.50986 | -0.2427418 | 0.23428442 | -1.036099  | 0.30015596 | 0.59506952 |
| Sigmar1     | 2892.21971 | -0.2427569 | 0.17834995 | -1.3611266 | 0.1734737  | 0.45091813 |
| Chd5        | 420.392562 | -0.2427609 | 0.213596   | -1.1365424 | 0.25572964 | 0.54856501 |
| Irgm1       | 192.755762 | -0.2428457 | 0.42904064 | -0.5660203 | 0.57137998 | 0.80538015 |
| Pcbd2       | 735.867822 | -0.2429342 | 0.23376791 | -1.0392109 | 0.29870666 | 0.59342417 |
| Tfam        | 6742.36154 | -0.2430008 | 0.15829917 | -1.5350734 | 0.12476579 | 0.37740378 |
| Hsp90b1     | 79381.0098 | -0.2431931 | 0.20771106 | -1.1708241 | 0.24166948 | 0.53421167 |

|             |            |            |            |            |            |            |
|-------------|------------|------------|------------|------------|------------|------------|
| Slu7        | 4775.35502 | -0.2432223 | 0.21197609 | -1.1474042 | 0.25121459 | 0.54470693 |
| Eef1d       | 19483.7275 | -0.2433077 | 0.20760317 | -1.1719847 | 0.2412032  | 0.53379122 |
| Slc12a3     | 13.827939  | -0.2433292 | 0.42977454 | -0.5661787 | 0.57127234 | 0.80538015 |
| Gimap8      | 8.13040633 | -0.2434478 | 0.42603445 | -0.5714276 | 0.56770985 | 0.80306738 |
| Hnrnp1      | 32800.7259 | -0.2435849 | 0.18007536 | -1.352683  | 0.17615693 | 0.45380054 |
| Cep128      | 2033.23125 | -0.2437053 | 0.17317696 | -1.4072617 | 0.1593498  | 0.43014212 |
| Gm6815      | 1.32537215 | -0.2437464 | 0.26422121 | -0.922509  | 0.35626315 | NA         |
| Zfp526      | 502.324256 | -0.2438497 | 0.25202477 | -0.9675625 | 0.33326291 | 0.62651977 |
| Wdr36       | 11873.1685 | -0.2438815 | 0.15315395 | -1.5923947 | 0.11129605 | 0.35271344 |
| Hgs         | 3324.99497 | -0.2439865 | 0.22461727 | -1.0862321 | 0.27737632 | 0.56958658 |
| Rps12       | 96350.6711 | -0.2440503 | 0.21524803 | -1.1338096 | 0.25687442 | 0.54993313 |
| Elof1       | 1856.4788  | -0.2440872 | 0.20596169 | -1.1851096 | 0.23597411 | 0.52775314 |
| Msi1        | 1606.44001 | -0.2442317 | 0.20010518 | -1.2205165 | 0.22226913 | 0.51090346 |
| Htt         | 4757.81668 | -0.2442757 | 0.2218567  | -1.1010517 | 0.27087416 | 0.56428186 |
| Zfp365      | 1082.89196 | -0.2443335 | 0.33671612 | -0.7256364 | 0.46806167 | 0.7360836  |
| Nsfl1c      | 6822.39832 | -0.2443732 | 0.1716485  | -1.4236841 | 0.15453793 | 0.42295308 |
| Med12       | 3478.85371 | -0.2444748 | 0.28587743 | -0.8551735 | 0.3924551  | 0.68031092 |
| Fzd5        | 6542.3228  | -0.2445503 | 0.23923205 | -1.0222307 | 0.30667174 | 0.60112463 |
| Rplp1       | 121772.452 | -0.2445521 | 0.20999094 | -1.1645843 | 0.24418731 | 0.53667346 |
| Rps15a      | 54957.6357 | -0.2446056 | 0.21847716 | -1.1195936 | 0.26288698 | 0.55517933 |
| Pik3r2      | 2294.71215 | -0.2447246 | 0.2240441  | -1.0923055 | 0.27469885 | 0.56715903 |
| Crebzf      | 3628.23979 | -0.2447536 | 0.2364046  | -1.0353168 | 0.30052099 | 0.59541367 |
| Rnf180      | 22.7190946 | -0.2447746 | 0.42876796 | -0.5708789 | 0.56808175 | 0.80306738 |
| Gstp1       | 2694.13612 | -0.2448127 | 0.25929186 | -0.9441589 | 0.34508844 | 0.63773152 |
| 1700125H20I | 43.9144949 | -0.2448705 | 0.43167986 | -0.5672503 | 0.57054412 | 0.80487644 |
| Gm3696      | 5.59618986 | -0.2448821 | 0.34539852 | -0.7089841 | 0.47833432 | NA         |
| Pcp4l1      | 50.744881  | -0.2449657 | 0.40078019 | -0.6112222 | 0.54105251 | 0.7846986  |
| Fam35a      | 1591.27909 | -0.244978  | 0.21036074 | -1.1645613 | 0.2441966  | 0.53667346 |
| Foxp4       | 3830.17016 | -0.2450051 | 0.28094472 | -0.872076  | 0.38316694 | 0.67230385 |
| Rpl9        | 67734.7025 | -0.2450302 | 0.19641222 | -1.2475302 | 0.21220316 | 0.49892572 |
| Fank1       | 538.813677 | -0.2451817 | 0.3066063  | -0.7996629 | 0.42390613 | 0.70263955 |
| Pggt1b      | 1529.06425 | -0.2452148 | 0.2334514  | -1.0503891 | 0.29353923 | 0.58737844 |
| Lsm14b      | 4694.07591 | -0.2453011 | 0.20538809 | -1.1943299 | 0.23234893 | 0.52411636 |
| Lcor        | 284.17439  | -0.2453376 | 0.34613281 | -0.7087961 | 0.47845103 | 0.74302874 |
| Surf4       | 8211.84278 | -0.2453547 | 0.15885894 | -1.5444815 | 0.12247173 | 0.37300389 |
| Mdfi        | 193.210977 | -0.2453695 | 0.30430365 | -0.8063312 | 0.4200519  | 0.70035672 |
| BC048403    | 1438.9911  | -0.2454002 | 0.21451605 | -1.143971  | 0.25263565 | 0.54598821 |
| Coq3        | 2569.04227 | -0.2454992 | 0.19381496 | -1.2666677 | 0.20527413 | 0.4903111  |
| Nabp1       | 3255.86543 | -0.2455113 | 0.25981198 | -0.9449576 | 0.3446805  | 0.63773152 |
| Yars2       | 2998.53219 | -0.2455316 | 0.17508504 | -1.4023563 | 0.16080887 | 0.43208565 |
| Gpsm1       | 333.334596 | -0.245578  | 0.37319252 | -0.6580465 | 0.51050823 | 0.76464545 |

|             |            |            |            |            |            |            |
|-------------|------------|------------|------------|------------|------------|------------|
| Trove2      | 2572.0201  | -0.2456009 | 0.20781259 | -1.1818385 | 0.23726979 | 0.52931278 |
| Spdyb       | 21.2993402 | -0.2456078 | 0.42528108 | -0.5775188 | 0.56358906 | 0.80003409 |
| Elk4        | 541.209264 | -0.2456685 | 0.304965   | -0.8055629 | 0.42049491 | 0.70082789 |
| 0610037L13F | 2172.29669 | -0.2456791 | 0.21692516 | -1.1325524 | 0.25740227 | 0.55010645 |
| Acox1       | 284.761655 | -0.2457401 | 0.33685993 | -0.7295022 | 0.46569451 | 0.73463332 |
| Cebpz       | 14977.2878 | -0.2457823 | 0.16498324 | -1.4897408 | 0.13629241 | 0.39419575 |
| Wdr90       | 1346.29287 | -0.2458483 | 0.18887248 | -1.3016631 | 0.19303157 | 0.47565108 |
| Snx30       | 2918.31976 | -0.2459552 | 0.18216371 | -1.3501877 | 0.17695578 | 0.45462404 |
| Rbm26       | 6795.75241 | -0.2461071 | 0.24158702 | -1.0187099 | 0.30834073 | 0.60291798 |
| Brd7        | 6848.19141 | -0.2461208 | 0.20463576 | -1.2027263 | 0.22908227 | 0.52003704 |
| Rspo4       | 4.48886748 | -0.2461491 | 0.35539601 | -0.6926052 | 0.48855735 | NA         |
| Ccdc30      | 507.611499 | -0.2461545 | 0.28595751 | -0.8608078 | 0.38934388 | 0.67794934 |
| 5430435G22I | 2.50716438 | -0.246317  | 0.29311719 | -0.8403364 | 0.40071978 | NA         |
| Prim2       | 4635.06338 | -0.2463884 | 0.21631642 | -1.1390183 | 0.25469552 | 0.5479142  |
| 1110059G10I | 846.132085 | -0.2464352 | 0.22412582 | -1.0995397 | 0.27153275 | 0.56508022 |
| Tubb2b      | 21812.5569 | -0.2464601 | 0.21219034 | -1.1615047 | 0.24543671 | 0.53833375 |
| Ndufs8      | 4502.83015 | -0.2465064 | 0.18800763 | -1.311151  | 0.18980674 | 0.47143981 |
| Hinfp       | 1486.42224 | -0.2465722 | 0.19874238 | -1.2406623 | 0.21473052 | 0.50176924 |
| Gm6249      | 3.26899335 | -0.2466503 | 0.37708345 | -0.6541001 | 0.5130473  | NA         |
| D430041D05  | 109.570718 | -0.2467003 | 0.31359351 | -0.7866881 | 0.43146449 | 0.70688509 |
| Sfxn5       | 324.164563 | -0.2467677 | 0.28761943 | -0.8579662 | 0.39091114 | 0.67903559 |
| Ccnt1       | 1912.8909  | -0.2467709 | 0.31376945 | -0.7864721 | 0.43159097 | 0.70693819 |
| Chd1l       | 3114.9708  | -0.2469851 | 0.17305549 | -1.4272019 | 0.1535217  | 0.42141036 |
| Lrrc58      | 3340.69114 | -0.2470211 | 0.24242335 | -1.018966  | 0.30821913 | 0.60283181 |
| Itga6       | 10157.7187 | -0.2471731 | 0.17781106 | -1.3900883 | 0.16450206 | 0.43755954 |
| Egln3       | 1287.7904  | -0.2473361 | 0.42730375 | -0.5788296 | 0.56270415 | 0.79946653 |
| Prss50      | 42.0291371 | -0.2473976 | 0.42399692 | -0.583489  | 0.55956414 | 0.79774311 |
| Mapk8ip2    | 450.708877 | -0.2474356 | 0.32792022 | -0.7545603 | 0.45051288 | 0.72293741 |
| Man1b1      | 5795.49993 | -0.2474784 | 0.17423482 | -1.4203731 | 0.15549909 | 0.42401655 |
| Lrrc59      | 24904.689  | -0.2479054 | 0.18308353 | -1.3540563 | 0.17571841 | 0.45331736 |
| Rab4b       | 2666.20211 | -0.248012  | 0.21011657 | -1.1803541 | 0.2378594  | 0.52993576 |
| Nradd       | 954.023059 | -0.2480919 | 0.21563748 | -1.1505045 | 0.24993613 | 0.54345033 |
| Puf60       | 8916.8372  | -0.2481728 | 0.19218434 | -1.2913267 | 0.19659042 | 0.47963252 |
| Srbd1       | 3335.35104 | -0.2482394 | 0.16423631 | -1.5114771 | 0.13066694 | 0.38666893 |
| Crisp1      | 420.857481 | -0.2483129 | 0.25136996 | -0.9878385 | 0.32323176 | 0.61781921 |
| Anxa7       | 9837.5478  | -0.2483371 | 0.17047975 | -1.4566954 | 0.14520048 | 0.40839439 |
| Rpusd4      | 2100.14924 | -0.2483673 | 0.17351877 | -1.431357  | 0.15232792 | 0.41993468 |
| Nup85       | 11250.1686 | -0.2485485 | 0.19884807 | -1.249942  | 0.21132075 | 0.49799197 |
| Ncl         | 201850.842 | -0.2485983 | 0.18337641 | -1.355672  | 0.17520356 | 0.45309298 |
| Pofut2      | 1704.72071 | -0.2488413 | 0.21690424 | -1.1472406 | 0.25128221 | 0.54477758 |
| Ptpn4       | 1005.36281 | -0.2489959 | 0.29732086 | -0.8374654 | 0.40233104 | 0.68694005 |

|             |            |            |            |            |            |            |
|-------------|------------|------------|------------|------------|------------|------------|
| Exo5        | 1090.4216  | -0.2490054 | 0.16151398 | -1.5416954 | 0.12314764 | 0.37454897 |
| Tmem256     | 3840.83795 | -0.2492592 | 0.2933109  | -0.8498122 | 0.39542949 | 0.68263121 |
| Snap25      | 3.57452833 | -0.2492983 | 0.32724132 | -0.761818  | 0.44616864 | NA         |
| Nop58       | 34464.0923 | -0.2495654 | 0.17702464 | -1.4097776 | 0.15860538 | 0.4288771  |
| 4930511E03F | 1.98033796 | -0.24968   | 0.31264149 | -0.7986143 | 0.42451411 | NA         |
| Gm1821      | 13.541854  | -0.2497342 | 0.43222827 | -0.5777831 | 0.5634106  | 0.79999829 |
| Pcna        | 18661.7713 | -0.2498316 | 0.16832474 | -1.484224  | 0.1377495  | 0.39657388 |
| Rtn4r       | 8.92236177 | -0.2498456 | 0.41939994 | -0.5957217 | 0.55136117 | 0.79108781 |
| Socs4       | 974.545137 | -0.2498459 | 0.26593884 | -0.9394864 | 0.34748108 | 0.63979142 |
| Mlx         | 3288.825   | -0.2498706 | 0.18386167 | -1.3590139 | 0.17414219 | 0.45149803 |
| Rbp7        | 43.5960214 | -0.2498751 | 0.3903979  | -0.6400523 | 0.52213859 | 0.77084692 |
| Zcchc8      | 8132.22554 | -0.2499563 | 0.1851943  | -1.3496978 | 0.17711294 | 0.45462566 |
| Stat6       | 3365.28665 | -0.2499788 | 0.15947903 | -1.5674711 | 0.11700462 | 0.36332646 |
| Smg1        | 11506.7399 | -0.2500001 | 0.26626054 | -0.9389301 | 0.34776661 | 0.63986259 |
| Map3k14     | 168.692233 | -0.250023  | 0.27348457 | -0.9142124 | 0.36060524 | 0.6515362  |
| Rpl15       | 23598.7361 | -0.2500901 | 0.16145205 | -1.5490052 | 0.12138046 | 0.37084235 |
| Apopt1      | 1526.0764  | -0.250098  | 0.22753302 | -1.0991722 | 0.27169295 | 0.56523668 |
| Srsf10      | 14217.3058 | -0.2502793 | 0.17071885 | -1.4660322 | 0.14263952 | 0.40382072 |
| Rps10       | 23620.2305 | -0.2502809 | 0.21017434 | -1.1908254 | 0.23372212 | 0.52530896 |
| Rnf222      | 4.32943854 | -0.2503396 | 0.39090079 | -0.6404173 | 0.52190132 | NA         |
| Gas1        | 211.349665 | -0.2503571 | 0.3497572  | -0.7158025 | 0.47411331 | 0.7401725  |
| Wbp2        | 6118.8957  | -0.2503743 | 0.17142945 | -1.4605096 | 0.14415008 | 0.40602751 |
| Btbd3       | 1407.78671 | -0.2504389 | 0.22692054 | -1.1036414 | 0.26974872 | 0.56269113 |
| Mylk3       | 8.03520109 | -0.2504421 | 0.408461   | -0.6131359 | 0.53978651 | 0.78370087 |
| Anapc2      | 5426.35973 | -0.2505193 | 0.20022749 | -1.2511734 | 0.21087122 | 0.49778092 |
| Prdm15      | 1518.57317 | -0.2506115 | 0.17628413 | -1.4216342 | 0.15513249 | 0.4237087  |
| Spata18     | 1.51122105 | -0.2506442 | 0.29875329 | -0.838967  | 0.40148783 | NA         |
| Krcc1       | 2361.40224 | -0.2506672 | 0.21481075 | -1.1669209 | 0.2432423  | 0.53577799 |
| Rbbp8       | 4520.53586 | -0.250677  | 0.16849561 | -1.487736  | 0.13682054 | 0.39489535 |
| Rps6ka5     | 1218.72235 | -0.2507135 | 0.22141321 | -1.132333  | 0.25749445 | 0.55010645 |
| 3110057012I | 233.356216 | -0.2507458 | 0.28547731 | -0.878339  | 0.3797598  | 0.66881593 |
| Zbtb20      | 65.1882162 | -0.250862  | 0.33712759 | -0.744116  | 0.45680632 | 0.72740069 |
| Trim33      | 8499.55827 | -0.2508721 | 0.1926098  | -1.3024889 | 0.19274933 | 0.47556451 |
| Hist1h2bp   | 11.2475703 | -0.2508778 | 0.43217348 | -0.5805024 | 0.56157584 | 0.79905798 |
| Pald1       | 8050.50424 | -0.2509435 | 0.18599179 | -1.3492183 | 0.17726686 | 0.45473338 |
| Trip11      | 1350.30428 | -0.2509569 | 0.27551528 | -0.9108637 | 0.36236722 | 0.65327607 |
| Foxk1       | 1131.73614 | -0.2509715 | 0.2583056  | -0.971607  | 0.3312461  | 0.62446456 |
| Tm2d3       | 1578.77972 | -0.2511527 | 0.2522118  | -0.9958009 | 0.31934688 | 0.61303091 |
| Ada         | 982.21975  | -0.251156  | 0.25005985 | -1.0043834 | 0.31519387 | 0.60949429 |
| Apol6       | 207.434236 | -0.2512494 | 0.40920848 | -0.6139888 | 0.5392227  | 0.78302849 |
| Zfp207      | 24381.7524 | -0.251299  | 0.15106716 | -1.6634916 | 0.09621408 | 0.32400358 |



|             |            |            |            |            |            |            |
|-------------|------------|------------|------------|------------|------------|------------|
| Cit         | 3061.48082 | -0.2515455 | 0.27094875 | -0.9283877 | 0.35320649 | 0.64483612 |
| Mir2861     | 2.93485814 | -0.251673  | 0.36418481 | -0.6910586 | 0.48952873 | NA         |
| Cpox        | 2855.30847 | -0.2517157 | 0.23230536 | -1.0835555 | 0.27856194 | 0.57081523 |
| Tada3       | 5832.56646 | -0.2517572 | 0.21748812 | -1.1575675 | 0.2470406  | 0.54002366 |
| Ric8b       | 1669.45562 | -0.2517959 | 0.20125702 | -1.2511163 | 0.21089205 | 0.49778092 |
| Kdm2b       | 5816.663   | -0.2518284 | 0.24936515 | -1.0098779 | 0.31255379 | 0.60703435 |
| Fbxl14      | 3558.53739 | -0.25195   | 0.20454004 | -1.2317883 | 0.21802819 | 0.50605318 |
| Six4        | 2933.72972 | -0.2520593 | 0.21984079 | -1.146554  | 0.25156601 | 0.5450894  |
| 4930430F08F | 1413.60073 | -0.2522321 | 0.19912096 | -1.2667278 | 0.20525263 | 0.4903111  |
| Kifc1       | 5911.94038 | -0.2522484 | 0.20588926 | -1.2251654 | 0.22051292 | 0.50895393 |
| AW209491    | 1129.01577 | -0.2522575 | 0.18512694 | -1.3626192 | 0.17300256 | 0.45019458 |
| 2900097C17F | 1016.05523 | -0.2523108 | 0.22465623 | -1.1230972 | 0.2613962  | 0.55366009 |
| Zfp518a     | 6373.25873 | -0.2523153 | 0.24239789 | -1.0409138 | 0.29791558 | 0.59236481 |
| Clpx        | 3576.45226 | -0.25233   | 0.1662585  | -1.517697  | 0.12909079 | 0.38406178 |
| Golga3      | 2859.39241 | -0.2523512 | 0.19071956 | -1.3231532 | 0.18578442 | 0.46651464 |
| Fkbp3       | 38163.8899 | -0.2524503 | 0.21647861 | -1.1661674 | 0.24354678 | 0.53577799 |
| Gmnn        | 7991.31284 | -0.2524607 | 0.19143015 | -1.3188139 | 0.18723135 | 0.46836678 |
| 11-Sep      | 17332.031  | -0.2525423 | 0.2050495  | -1.2316165 | 0.21809239 | 0.50612666 |
| Scarna10    | 5.95108084 | -0.2525767 | 0.4037263  | -0.6256136 | 0.53156843 | 0.7782358  |
| Cyp2t4      | 9.08008007 | -0.2527171 | 0.42517787 | -0.5943798 | 0.55225815 | 0.79179683 |
| Ddx26b      | 2114.62107 | -0.2527179 | 0.20934569 | -1.2071796 | 0.22736298 | 0.51753644 |
| Sptbn1      | 21566.2909 | -0.2528043 | 0.23837461 | -1.0605338 | 0.28890182 | 0.58216601 |
| Hmg20a      | 2034.67534 | -0.2528542 | 0.16784011 | -1.5065183 | 0.13193417 | 0.38843399 |
| Aes         | 11496.3687 | -0.2528656 | 0.18363263 | -1.3770186 | 0.16850649 | 0.44336524 |
| Brsk2       | 176.09509  | -0.2529019 | 0.2953033  | -0.856414  | 0.3917688  | 0.67980324 |
| Olf153      | 42.0072882 | -0.2529346 | 0.40459356 | -0.6251572 | 0.53186787 | 0.77840121 |
| Cops7b      | 2275.6832  | -0.2530129 | 0.21517718 | -1.1758351 | 0.23966077 | 0.53163981 |
| Limd1       | 1213.13811 | -0.253046  | 0.21262768 | -1.1900898 | 0.23401112 | 0.52565461 |
| Rnf123      | 1121.74355 | -0.2530861 | 0.19959463 | -1.2680008 | 0.20479767 | 0.49017049 |
| Rpl21       | 53658.1648 | -0.2531035 | 0.19833794 | -1.2761223 | 0.2019123  | 0.48641802 |
| Ssu72       | 6294.39262 | -0.2531583 | 0.21360449 | -1.185173  | 0.23594904 | 0.52775314 |
| Smad2       | 4490.80963 | -0.2531594 | 0.18180767 | -1.3924574 | 0.16378393 | 0.43630265 |
| H2-BI       | 546.637267 | -0.2531666 | 0.25870905 | -0.9785763 | 0.32778937 | 0.62118602 |
| Tbl1xr1     | 5725.51311 | -0.2531989 | 0.18594644 | -1.3616764 | 0.17330004 | 0.45071973 |
| Tmem86a     | 133.520974 | -0.2532228 | 0.33247213 | -0.7616363 | 0.4462771  | 0.71954953 |
| Zfp955b     | 1861.41831 | -0.2532477 | 0.1902166  | -1.331365  | 0.18306894 | 0.46313732 |
| Timeless    | 8353.8535  | -0.2532613 | 0.2093509  | -1.2097456 | 0.22637651 | 0.51656362 |
| Tmed5       | 3457.19697 | -0.2532651 | 0.21636094 | -1.1705674 | 0.24177272 | 0.53421167 |
| Vcl         | 8329.68197 | -0.2533802 | 0.18658239 | -1.358007  | 0.17446145 | 0.45187376 |
| Tbc1d9b     | 2811.38968 | -0.2534496 | 0.19439369 | -1.3037956 | 0.19230327 | 0.4751259  |
| Dgcr2       | 4669.93791 | -0.2535208 | 0.18429749 | -1.3756066 | 0.16894345 | 0.44386545 |

|             |            |            |            |            |            |            |
|-------------|------------|------------|------------|------------|------------|------------|
| Bcl2l11     | 1048.52805 | -0.253524  | 0.28446742 | -0.8912232 | 0.37280944 | 0.66269681 |
| Uqcrfs1     | 7777.16034 | -0.2535483 | 0.15258705 | -1.6616631 | 0.09658035 | 0.32466947 |
| Ndufaf6     | 1359.08896 | -0.2536642 | 0.20692631 | -1.2258672 | 0.22024866 | 0.50877701 |
| Golgb1      | 8174.17214 | -0.2537618 | 0.18128748 | -1.3997757 | 0.16158051 | 0.43255956 |
| Rock1       | 6198.02481 | -0.2538636 | 0.22203434 | -1.1433528 | 0.25289213 | 0.54598821 |
| Nfkbia      | 2783.49563 | -0.2538867 | 0.1611283  | -1.5756803 | 0.1150995  | 0.36004695 |
| Zfp69       | 354.250331 | -0.25391   | 0.24561311 | -1.0337804 | 0.30123883 | 0.59607648 |
| Hsf4        | 28.6575601 | -0.2539902 | 0.41980042 | -0.605026  | 0.54516173 | 0.78658472 |
| Dhx29       | 5158.94123 | -0.2541656 | 0.17347915 | -1.4651073 | 0.14289166 | 0.40406505 |
| Pnn         | 12452.9943 | -0.2542978 | 0.16143103 | -1.575272  | 0.11519367 | 0.36014812 |
| Setd5       | 13895.2265 | -0.2544957 | 0.23206574 | -1.0966536 | 0.27279284 | 0.56606275 |
| Ttc4        | 4435.11981 | -0.2545366 | 0.17191536 | -1.4805923 | 0.13871524 | 0.39807358 |
| Rbm33       | 5855.40034 | -0.2545902 | 0.23058868 | -1.1040881 | 0.26955491 | 0.56260264 |
| Mphosph6    | 5302.81069 | -0.2546172 | 0.19996903 | -1.2732833 | 0.20291752 | 0.48733798 |
| Hs3st5      | 1.43467495 | -0.254668  | 0.26801107 | -0.9502144 | 0.34200334 | NA         |
| Rpl10a      | 26547.7419 | -0.2546854 | 0.21627664 | -1.177591  | 0.2389597  | 0.53094189 |
| Fhit        | 34.3771368 | -0.2547034 | 0.42736417 | -0.5959868 | 0.55118404 | 0.7910861  |
| Mmachc      | 2438.29648 | -0.2547969 | 0.16673427 | -1.5281614 | 0.12647248 | 0.37981113 |
| Dctpp1      | 7808.64519 | -0.2549341 | 0.215737   | -1.1816894 | 0.23732895 | 0.52936065 |
| Bhlhb9      | 2540.13543 | -0.254959  | 0.23862473 | -1.0684517 | 0.28531679 | 0.5782564  |
| Nid2        | 26248.6608 | -0.254979  | 0.22386165 | -1.1390026 | 0.25470206 | 0.5479142  |
| Trh         | 5147.86656 | -0.2550389 | 0.38433495 | -0.6635849 | 0.50695605 | 0.7622968  |
| Gm15915     | 9.30811909 | -0.255093  | 0.40655652 | -0.6274479 | 0.53036569 | 0.77749971 |
| 1700001P01F | 193.111904 | -0.2552251 | 0.39752819 | -0.6420303 | 0.5208535  | 0.76986886 |
| Ccnc        | 4892.68797 | -0.2552727 | 0.17134934 | -1.4897791 | 0.13628234 | 0.39419575 |
| Gigyf1      | 5190.45974 | -0.2552875 | 0.19529774 | -1.3071708 | 0.19115471 | 0.47328664 |
| Btf3        | 24409.1074 | -0.2555456 | 0.17488582 | -1.4612142 | 0.14395667 | 0.40567894 |
| 4930594C11F | 5.05006887 | -0.2556899 | 0.41015854 | -0.6233928 | 0.53302642 | NA         |
| Gli1        | 553.820564 | -0.2558263 | 0.33611049 | -0.7611375 | 0.44657493 | 0.71995509 |
| 4931440L10F | 56.8919859 | -0.2559231 | 0.40559427 | -0.630983  | 0.52805165 | 0.77542315 |
| Sostdc1     | 1.89938919 | -0.2560116 | 0.28677558 | -0.8927246 | 0.37200467 | NA         |
| Mkln1       | 6283.05384 | -0.2560394 | 0.170568   | -1.5010989 | 0.13332998 | 0.39033562 |
| Cbx2        | 2432.2712  | -0.256076  | 0.2380628  | -1.0756657 | 0.2820768  | 0.5745352  |
| A830082N09  | 87.1448906 | -0.2561729 | 0.34897492 | -0.7340726 | 0.46290449 | 0.73275933 |
| Gnl1        | 5786.58554 | -0.2561813 | 0.20930351 | -1.2239702 | 0.22096347 | 0.50916681 |
| Hip1r       | 1199.92214 | -0.2564164 | 0.22816292 | -1.1238302 | 0.26108508 | 0.55322715 |
| Exosc2      | 5428.65104 | -0.2565844 | 0.17060048 | -1.5040073 | 0.13257949 | 0.38909721 |
| Gnb1        | 28924.7592 | -0.2565918 | 0.15026895 | -1.7075506 | 0.08771977 | 0.30834767 |
| Tbx5        | 11.3025666 | -0.2565933 | 0.42935899 | -0.5976195 | 0.55009386 | 0.79054705 |
| Nmd3        | 10338.4562 | -0.2566732 | 0.16821706 | -1.5258454 | 0.12704837 | 0.38082677 |
| Usp1        | 11864.5541 | -0.2568071 | 0.18317157 | -1.4020028 | 0.16091442 | 0.43209007 |

|          |            |            |            |            |            |            |
|----------|------------|------------|------------|------------|------------|------------|
| Uhmk1    | 825.502133 | -0.2568167 | 0.3299938  | -0.778247  | 0.43642339 | 0.71028991 |
| Ssrp1    | 28389.775  | -0.25683   | 0.18370474 | -1.3980587 | 0.16209545 | 0.43334131 |
| Slc20a1  | 12950.2839 | -0.2571391 | 0.18499946 | -1.389945  | 0.16454557 | 0.43755954 |
| Med4     | 3505.56435 | -0.2572152 | 0.15899968 | -1.6177091 | 0.1057253  | 0.34245662 |
| Cep5711  | 3543.8592  | -0.2572575 | 0.25724841 | -1.0000352 | 0.31729346 | 0.61159656 |
| Pold3    | 7344.39078 | -0.2572888 | 0.20549674 | -1.2520334 | 0.2105577  | 0.49747535 |
| Fancb    | 1115.8602  | -0.2573795 | 0.17832176 | -1.4433431 | 0.14892385 | 0.41399978 |
| Itpripl2 | 297.721684 | -0.25738   | 0.42227353 | -0.6095101 | NA         | NA         |
| Sv2b     | 3.31525651 | -0.257435  | 0.34718683 | -0.7414885 | 0.45839729 | NA         |
| Mir6921  | 2.94145806 | -0.257437  | 0.3395848  | -0.7580935 | 0.44839501 | NA         |
| Mcee     | 1202.68933 | -0.2574837 | 0.21654246 | -1.1890679 | 0.23441295 | 0.5263048  |
| Rexo1    | 3551.96902 | -0.2575278 | 0.22156271 | -1.1623245 | 0.24510368 | 0.537854   |
| Hps1     | 1393.81378 | -0.2576079 | 0.2147481  | -1.1995816 | 0.23030189 | 0.52169334 |
| Zfp820   | 1459.4549  | -0.2578604 | 0.32537651 | -0.7924984 | 0.42807011 | 0.70472095 |
| Gpr3     | 23.8711183 | -0.257868  | 0.41818769 | -0.6166322 | 0.53747734 | 0.78129651 |
| Trmt2b   | 989.136901 | -0.2580113 | 0.21820685 | -1.1824161 | 0.23704065 | 0.52909706 |
| Kdelr3   | 1307.49395 | -0.2580279 | 0.22081092 | -1.1685466 | 0.24258634 | 0.53481431 |
| Xkrx     | 5.82344127 | -0.2580397 | 0.41028906 | -0.6289217 | 0.52940034 | NA         |
| Ddx17    | 37341.1595 | -0.258118  | 0.19076504 | -1.3530677 | 0.17603402 | 0.45375831 |
| Col23a1  | 31.2372099 | -0.2583668 | 0.39320449 | -0.6570798 | 0.51112957 | 0.76501865 |
| Npat     | 5534.04409 | -0.2584663 | 0.22120028 | -1.1684717 | 0.24261657 | 0.53481431 |
| Commd8   | 4236.84697 | -0.2585313 | 0.16934087 | -1.5266918 | 0.12683768 | 0.38060552 |
| Zfp511   | 1037.54282 | -0.2585829 | 0.21209582 | -1.2191797 | 0.22277601 | 0.51187791 |
| Ptbp2    | 3349.16067 | -0.2586398 | 0.20757093 | -1.2460311 | 0.21275296 | 0.49939945 |
| Impact   | 13009.5782 | -0.2586757 | 0.14595159 | -1.7723387 | 0.07633835 | 0.28346171 |
| Ilkap    | 3350.23217 | -0.2586782 | 0.1798475  | -1.4383199 | 0.15034331 | 0.41660527 |
| Fkbp4    | 52097.8462 | -0.2587009 | 0.19961115 | -1.2960241 | 0.19496718 | 0.47789096 |
| Tmem161b | 2281.93442 | -0.2588375 | 0.18087246 | -1.4310496 | 0.152416   | 0.42002857 |
| Igsf23   | 235.686336 | -0.2588524 | 0.42855429 | -0.6040131 | NA         | NA         |
| Tubgcp6  | 2555.51728 | -0.2589444 | 0.21040963 | -1.2306679 | 0.21844709 | 0.50664737 |
| Rrp15    | 5630.60423 | -0.2589578 | 0.17863601 | -1.4496397 | 0.14715902 | 0.41166934 |
| Ndufb8   | 9372.16072 | -0.2590812 | 0.19681124 | -1.3163945 | 0.18804167 | 0.46937977 |
| Zdhhc14  | 137.923408 | -0.2590882 | 0.3681577  | -0.7037425 | 0.48159318 | 0.74482882 |
| Dmpk     | 348.59035  | -0.2593496 | 0.21969198 | -1.1805148 | 0.23779551 | 0.52993576 |
| Zfp940   | 1520.62252 | -0.2594273 | 0.19892493 | -1.3041466 | 0.19218362 | 0.4751259  |
| Tcp1     | 57101.1768 | -0.2597909 | 0.15524345 | -1.6734422 | 0.09424028 | 0.31998486 |
| Trp53    | 20394.1229 | -0.2598663 | 0.21106174 | -1.2312334 | 0.21823559 | 0.50630788 |
| Gsg2     | 2499.97276 | -0.2598736 | 0.20835767 | -1.2472477 | 0.21230667 | 0.49895437 |
| Ppm1a    | 8187.55939 | -0.2599365 | 0.2242329  | -1.1592256 | 0.24636426 | 0.53945517 |
| Arl6ip6  | 3930.14795 | -0.2599655 | 0.1798396  | -1.4455411 | 0.14830597 | 0.41339058 |
| Sf3a2    | 3406.45267 | -0.2599707 | 0.21665104 | -1.1999514 | 0.23015822 | 0.52144384 |

|             |            |            |            |            |            |            |
|-------------|------------|------------|------------|------------|------------|------------|
| Usp42       | 1819.46158 | -0.260051  | 0.21827928 | -1.1913682 | 0.23350907 | 0.52506228 |
| Zdhhc21     | 2317.04481 | -0.2600782 | 0.23463968 | -1.1084152 | 0.26768253 | 0.56056168 |
| Lin28a      | 2688.38347 | -0.2601555 | 0.4319631  | -0.6022632 | 0.54699898 | 0.78806569 |
| Lemd2       | 1985.43715 | -0.2602283 | 0.22602271 | -1.1513368 | 0.24959372 | 0.54310658 |
| Gpam        | 1004.45647 | -0.2602505 | 0.2688062  | -0.9681715 | 0.33295872 | 0.626175   |
| Eprs        | 44265.3633 | -0.2603593 | 0.14151539 | -1.8397951 | 0.06579832 | 0.25983486 |
| Mfsd12      | 1118.67052 | -0.26041   | 0.24268045 | -1.0730571 | 0.28324551 | 0.57570918 |
| Neur14      | 4206.38208 | -0.2604235 | 0.22983464 | -1.1330907 | 0.25717615 | 0.55006377 |
| Gm15421     | 74.126251  | -0.2604271 | 0.34345494 | -0.758257  | 0.44829713 | 0.72108696 |
| Lrrc29      | 65.476207  | -0.2604939 | 0.39498919 | -0.6594963 | 0.5095771  | 0.76413825 |
| Mre11a      | 6145.79363 | -0.2605748 | 0.17868432 | -1.4582968 | 0.14475874 | 0.40736725 |
| Gbe1        | 227.378221 | -0.2605798 | 0.29944708 | -0.8702031 | 0.38418943 | 0.6734141  |
| Xrcc6       | 7574.1886  | -0.2605957 | 0.17460518 | -1.4924856 | 0.13557188 | 0.39328705 |
| Stag2       | 7142.76635 | -0.260606  | 0.20165758 | -1.2923195 | 0.19624652 | 0.47933634 |
| Npepps      | 15410.149  | -0.260661  | 0.18549026 | -1.4052544 | 0.15994564 | 0.43124038 |
| Atp11b      | 9988.68787 | -0.2607077 | 0.20350839 | -1.2810659 | 0.20017051 | 0.48358734 |
| Myt1        | 3.4167106  | -0.2607118 | 0.33700659 | -0.7736105 | 0.43916114 | NA         |
| Il6         | 1.39601858 | -0.2607367 | 0.27152104 | -0.9602819 | 0.33691336 | NA         |
| P4ha1       | 4869.39497 | -0.2608832 | 0.29165561 | -0.8944907 | 0.37105942 | 0.6614334  |
| Orai2       | 164.313578 | -0.2611853 | 0.30769241 | -0.8488518 | 0.39596376 | 0.68281575 |
| Slc25a12    | 2676.30068 | -0.2612654 | 0.17288654 | -1.5111957 | 0.13073859 | 0.38666893 |
| Clstn1      | 12057.4285 | -0.2613243 | 0.19464148 | -1.3425933 | 0.1794037  | 0.4575904  |
| Polr2b      | 18502.5099 | -0.261336  | 0.1679867  | -1.5556948 | 0.11978068 | 0.36826994 |
| Snx6        | 8000.05302 | -0.2613463 | 0.19792373 | -1.3204397 | 0.18668826 | 0.46780361 |
| Ncs1        | 840.277275 | -0.2614843 | 0.23006115 | -1.1365859 | 0.25571143 | 0.54856501 |
| Asph        | 4589.15175 | -0.2615808 | 0.19310366 | -1.3546136 | 0.17554069 | 0.45314528 |
| Hint2       | 1345.99457 | -0.2616137 | 0.25486276 | -1.0264884 | 0.30466144 | 0.59956683 |
| Hes2        | 10.5097569 | -0.2617348 | 0.43189376 | -0.6060166 | 0.5445037  | 0.78623679 |
| Chd8        | 10346.1699 | -0.2618376 | 0.23857642 | -1.0974999 | 0.27242291 | 0.56572838 |
| Crlf3       | 7048.02302 | -0.2618616 | 0.16579539 | -1.5794262 | 0.11423834 | 0.35809723 |
| Cacna1h     | 69.7474826 | -0.2618817 | 0.41101779 | -0.6371542 | 0.52402442 | 0.77176852 |
| Vps54       | 13969.2003 | -0.2620735 | 0.19982899 | -1.3114889 | 0.18969265 | 0.4714053  |
| Slc6a19     | 4.9536549  | -0.2620938 | 0.39403013 | -0.6651617 | 0.50594705 | NA         |
| 5031434C07F | 1.94065178 | -0.2621428 | 0.28346563 | -0.924778  | 0.35508141 | NA         |
| Fv1         | 47.8730886 | -0.262203  | 0.43213569 | -0.6067608 | 0.54400967 | 0.78623679 |
| Zfp451      | 4815.09176 | -0.2622206 | 0.17137156 | -1.5301292 | 0.12598475 | 0.37888006 |
| Rab18       | 12891.376  | -0.2623085 | 0.17657646 | -1.4855238 | 0.13740512 | 0.39592125 |
| Scrt2       | 2.77193507 | -0.2623449 | 0.33983467 | -0.7719781 | 0.44012738 | NA         |
| Pebp1       | 5510.93738 | -0.2623809 | 0.23236141 | -1.1291929 | 0.25881648 | 0.55112352 |
| Hipk1       | 4142.39793 | -0.2625338 | 0.23543116 | -1.1151193 | 0.2647993  | 0.5564253  |
| Atp5b       | 156150.56  | -0.2625926 | 0.15891172 | -1.652443  | 0.09844427 | 0.32816868 |

|             |            |            |            |            |            |            |
|-------------|------------|------------|------------|------------|------------|------------|
| Dnmbp       | 2488.86451 | -0.2626047 | 0.23649701 | -1.1103932 | 0.26682962 | 0.55937819 |
| Heatr5a     | 4585.88226 | -0.2626081 | 0.2379167  | -1.1037818 | 0.26968778 | 0.56263948 |
| Cenpq       | 1852.50648 | -0.2626616 | 0.19677561 | -1.334828  | 0.18193265 | 0.46108779 |
| Tspan18     | 25.8158441 | -0.2626965 | 0.42292074 | -0.6211484 | NA         | NA         |
| Brwd1       | 10224.6984 | -0.2627467 | 0.17637385 | -1.4897145 | 0.13629931 | 0.39419575 |
| Dnm1        | 336.853248 | -0.2627613 | 0.38805029 | -0.677132  | 0.49832219 | 0.75670871 |
| Tep1        | 1198.99193 | -0.2627692 | 0.30954756 | -0.8488815 | 0.39594721 | 0.68281575 |
| Fam120a     | 12156.7078 | -0.2628386 | 0.18657108 | -1.4087854 | 0.15889864 | 0.42944608 |
| Gulo        | 228.997274 | -0.2628578 | 0.29006528 | -0.9062022 | 0.36482883 | 0.6548307  |
| Repin1      | 1126.73237 | -0.2631839 | 0.20693881 | -1.2717959 | 0.20344564 | 0.4880122  |
| E330013P04F | 1.41534676 | -0.2633584 | 0.27222074 | -0.9674444 | 0.33332193 | NA         |
| H2-K2       | 115.44003  | -0.2635962 | 0.30327012 | -0.8691797 | 0.38474884 | 0.67393886 |
| Supt16      | 38918.0191 | -0.2637926 | 0.18472085 | -1.4280605 | 0.15327444 | 0.4210512  |
| Tbc1d10c    | 130.789165 | -0.2639642 | 0.31921769 | -0.8269098 | 0.40828821 | 0.69198369 |
| 2310008N11I | 5.26656889 | -0.2640042 | 0.39515272 | -0.6681068 | 0.50406542 | NA         |
| Cyp51       | 10802.3138 | -0.2640133 | 0.2083002  | -1.2674652 | 0.20498899 | 0.49027741 |
| Ttc23       | 1172.45829 | -0.2640743 | 0.27339901 | -0.9658934 | 0.33409754 | 0.62729999 |
| Exosc10     | 9281.2116  | -0.2641023 | 0.17257681 | -1.5303466 | 0.12593095 | 0.37885621 |
| Mcm5        | 32305.3808 | -0.264141  | 0.23536274 | -1.1222721 | 0.26174678 | 0.55406701 |
| Tmem2       | 3528.599   | -0.2642306 | 0.27268137 | -0.9690085 | 0.33254094 | 0.62583232 |
| Paxip1      | 7905.90719 | -0.2644476 | 0.20281788 | -1.3038673 | 0.19227882 | 0.4751259  |
| Rpl36a      | 33447.596  | -0.2646107 | 0.22464091 | -1.1779276 | 0.23882547 | 0.53094189 |
| Mir18       | 3.85589922 | -0.2648393 | 0.35287784 | -0.7505128 | 0.45294595 | NA         |
| Atp6v0a1    | 2938.77684 | -0.2648603 | 0.1847783  | -1.433395  | 0.15174498 | 0.41871751 |
| Uspl1       | 6277.74838 | -0.2648838 | 0.19633473 | -1.3491439 | 0.17729075 | 0.45473338 |
| Vrk1        | 6954.52741 | -0.2649154 | 0.16000103 | -1.6557108 | 0.09778039 | 0.32672602 |
| Zfp948      | 1522.48476 | -0.264959  | 0.2833085  | -0.9352315 | 0.349669   | 0.64198366 |
| Mir6998     | 2.21080042 | -0.2650626 | 0.30669892 | -0.8642435 | 0.38745412 | NA         |
| Foxk2       | 5493.19094 | -0.2651393 | 0.17909565 | -1.4804342 | 0.13875742 | 0.39807902 |
| Uxt         | 1151.09052 | -0.2653726 | 0.20848819 | -1.2728425 | 0.20307395 | 0.48749661 |
| Kcnt1       | 12.1177757 | -0.265401  | 0.42620434 | -0.6227084 | 0.53347618 | 0.77941451 |
| Qars        | 20661.2475 | -0.2656267 | 0.19602117 | -1.355092  | 0.17538824 | 0.45309298 |
| 9330159F19F | 23.5376059 | -0.2656473 | 0.38616124 | -0.6879181 | NA         | NA         |
| Wbp11       | 10915.8386 | -0.2659304 | 0.20482094 | -1.2983554 | 0.19416523 | 0.47685777 |
| G3bp1       | 40768.1722 | -0.2659533 | 0.1590169  | -1.6724847 | 0.09442877 | 0.32034509 |
| Gspt1       | 21326.2008 | -0.2660632 | 0.18290487 | -1.4546534 | 0.14576524 | 0.40939052 |
| Cops4       | 7491.52525 | -0.2661135 | 0.16611152 | -1.6020171 | 0.10915182 | 0.34910823 |
| Hdgf        | 37197.9634 | -0.2661235 | 0.17068199 | -1.5591771 | 0.11895447 | 0.36681756 |
| Serpina9    | 3.46479361 | -0.2662019 | 0.29653611 | -0.8977049 | 0.36934291 | NA         |
| Gcnt2       | 7157.19778 | -0.2662231 | 0.15486554 | -1.7190595 | 0.08560353 | 0.30351586 |
| Srek1ip1    | 1460.91218 | -0.2662395 | 0.1938909  | -1.373141  | 0.16970852 | 0.44511837 |

|             |            |            |            |            |            |            |
|-------------|------------|------------|------------|------------|------------|------------|
| Pygl        | 232.382982 | -0.2662783 | 0.36879423 | -0.7220241 | 0.47027964 | 0.73786621 |
| Farsb       | 14451.7382 | -0.2662794 | 0.14728112 | -1.8079672 | 0.0706116  | 0.27033013 |
| Pafah1b1    | 18979.259  | -0.2663027 | 0.1673191  | -1.5915858 | 0.11147781 | 0.35314554 |
| Ddx11       | 3284.39818 | -0.2663806 | 0.18562808 | -1.4350234 | 0.15128042 | 0.41838967 |
| Gja1        | 2843.14861 | -0.2664441 | 0.32547534 | -0.8186307 | 0.41299712 | 0.69515344 |
| Rfc4        | 3935.5057  | -0.2665493 | 0.16971364 | -1.5705828 | 0.11627958 | 0.36215977 |
| Zfp644      | 3692.75819 | -0.266571  | 0.21538973 | -1.2376216 | 0.21585641 | 0.50281353 |
| Car9        | 52.1847729 | -0.2667462 | 0.39927345 | -0.668079  | 0.50408319 | 0.76025581 |
| Papd5       | 4133.92011 | -0.2668822 | 0.25540777 | -1.044926  | 0.29605718 | 0.5907089  |
| Foxn2       | 6195.86779 | -0.266997  | 0.2240504  | -1.1916826 | 0.23338572 | 0.52500816 |
| Tmem8       | 3915.34763 | -0.267004  | 0.15754449 | -1.6947845 | 0.09011631 | 0.31260289 |
| Jsrp1       | 28.6540523 | -0.2670117 | 0.43221344 | -0.6177775 | 0.53672201 | 0.78097821 |
| Aim1        | 25.615446  | -0.2670669 | 0.40862461 | -0.6535751 | 0.51338562 | 0.76592775 |
| Rtn4        | 27913.5173 | -0.2672873 | 0.16915983 | -1.5800873 | 0.11408688 | 0.35801802 |
| Mical3      | 3767.75576 | -0.2673004 | 0.18635476 | -1.4343632 | 0.15146865 | 0.41867917 |
| Rad18       | 2246.96392 | -0.2674513 | 0.17998611 | -1.485955  | 0.13729102 | 0.39568649 |
| Hnrnpc      | 46404.7602 | -0.2674706 | 0.17695112 | -1.5115506 | 0.13064822 | 0.38666893 |
| Txlng       | 3369.02679 | -0.2674861 | 0.1677276  | -1.5947651 | 0.11076477 | 0.35177853 |
| Fam189b     | 533.722693 | -0.2675229 | 0.27524119 | -0.9719583 | 0.33107132 | 0.62428641 |
| Fras1       | 21.3332062 | -0.2675587 | 0.42736691 | -0.6260633 | 0.53127343 | 0.7782358  |
| Mtl5        | 117.519286 | -0.2675652 | 0.29769304 | -0.8987958 | 0.36876145 | 0.65913197 |
| Fezf1       | 4.40988173 | -0.2676137 | 0.39715271 | -0.6738308 | 0.50041887 | NA         |
| Trmt10c     | 3839.20495 | -0.2676267 | 0.16511379 | -1.6208623 | 0.10504718 | 0.34118393 |
| Zscan12     | 1368.94566 | -0.2676338 | 0.18305016 | -1.4620793 | 0.14371949 | 0.40532857 |
| AU040320    | 941.920247 | -0.2676864 | 0.21743235 | -1.2311249 | 0.21827615 | 0.50632643 |
| Cyp4f13     | 946.828781 | -0.2676865 | 0.23962747 | -1.1170945 | 0.26395392 | 0.555747   |
| 4930404A10f | 34.0507373 | -0.2676906 | 0.4231913  | -0.6325523 | 0.52702602 | 0.7745763  |
| 4921529L05F | 3.20564028 | -0.2678531 | 0.30570563 | -0.8761799 | 0.38093223 | NA         |
| Cplx2       | 58.9094848 | -0.2678575 | 0.3735933  | -0.7169763 | 0.47338874 | 0.73971926 |
| Atxn7l3     | 6878.54464 | -0.2678907 | 0.23135678 | -1.1579116 | 0.24690011 | 0.53979243 |
| Cdk16       | 8003.25404 | -0.2681729 | 0.16482017 | -1.6270639 | 0.10372353 | 0.33917927 |
| Adprhl2     | 2060.75161 | -0.2681744 | 0.17963083 | -1.4929195 | 0.13545826 | 0.39321069 |
| Wdr48       | 4925.97346 | -0.2683052 | 0.15998192 | -1.6770973 | 0.09352346 | 0.3186469  |
| Zfp946      | 538.737483 | -0.2683373 | 0.22213229 | -1.2080068 | 0.22704464 | 0.51714743 |
| Tbcel       | 2600.87512 | -0.2684005 | 0.23057171 | -1.1640653 | 0.24439756 | 0.53699054 |
| Slc28a1     | 2280.55449 | -0.2684746 | 0.28326509 | -0.9477856 | 0.34323863 | 0.63670595 |
| Ccnl2       | 8272.9028  | -0.2687098 | 0.16198221 | -1.6588845 | 0.09713906 | 0.32584331 |
| Fam134b     | 1877.55464 | -0.2688024 | 0.21676637 | -1.2400556 | 0.21495483 | 0.50221793 |
| Rassf1      | 756.496367 | -0.2688374 | 0.19588695 | -1.3724109 | 0.16993555 | 0.44511837 |
| Tnfrsf23    | 41.3483933 | -0.2688583 | 0.40373541 | -0.6659271 | 0.5054577  | 0.76107404 |
| Vps36       | 4045.40165 | -0.2688813 | 0.1696293  | -1.585111  | 0.11294111 | 0.35604039 |

|             |            |            |            |            |            |            |
|-------------|------------|------------|------------|------------|------------|------------|
| Dpagt1      | 1506.44952 | -0.2688875 | 0.16988272 | -1.5827832 | 0.11347088 | 0.35705903 |
| Sf3b2       | 25100.0516 | -0.2689737 | 0.17979286 | -1.4960196 | 0.13464854 | 0.3921628  |
| Ap4e1       | 2473.3517  | -0.2690272 | 0.2166575  | -1.2417166 | 0.21434114 | 0.50148986 |
| Ndufv2      | 14779.3748 | -0.2690535 | 0.20017882 | -1.3440659 | 0.17892707 | 0.45698386 |
| Hist1h3a    | 7.82442772 | -0.269054  | 0.41284987 | -0.6516994 | 0.51459511 | 0.76641122 |
| Tfap4       | 2015.43239 | -0.2691275 | 0.1836467  | -1.4654634 | 0.14279452 | 0.40396535 |
| Sephs2      | 9277.7834  | -0.2691307 | 0.16673122 | -1.6141593 | 0.10649288 | 0.34401139 |
| Glt8d1      | 1381.78938 | -0.2692218 | 0.23338139 | -1.1535702 | 0.24867641 | 0.54187974 |
| Htr1d       | 4.68421621 | -0.2692625 | 0.36615205 | -0.7353843 | 0.46210547 | NA         |
| Nom1        | 4115.98927 | -0.2694358 | 0.18648625 | -1.4448027 | 0.14851331 | 0.41357758 |
| Sdccag3     | 3975.70754 | -0.2694453 | 0.16365717 | -1.6464007 | 0.09968129 | 0.33009875 |
| 1190002N15I | 2243.37725 | -0.2694707 | 0.2266076  | -1.1891514 | 0.23438011 | 0.5263048  |
| Ccdc15      | 388.588658 | -0.2696077 | 0.27440627 | -0.9825129 | 0.32584723 | 0.61926293 |
| Mettl7a2    | 4.90319025 | -0.2696838 | 0.38966513 | -0.6920911 | 0.48888014 | NA         |
| Sc1t1       | 766.157696 | -0.2696955 | 0.24090426 | -1.1195134 | 0.26292117 | 0.55517933 |
| Rad54l      | 4840.54497 | -0.2697634 | 0.16177236 | -1.6675493 | 0.09540523 | 0.32274239 |
| Mapkbp1     | 1442.32792 | -0.2697977 | 0.18358435 | -1.4696117 | 0.14166694 | 0.40234221 |
| Dstn        | 22862.516  | -0.2698147 | 0.15286915 | -1.7650043 | 0.07756305 | 0.28602868 |
| Wdr4        | 2075.76859 | -0.2699056 | 0.23323577 | -1.1572221 | 0.24718164 | 0.54012689 |
| Mtmr12      | 8738.99398 | -0.2700014 | 0.22307693 | -1.2103511 | 0.2261442  | 0.51610925 |
| Rpl24       | 19252.2749 | -0.2700094 | 0.20640283 | -1.3081671 | 0.19081663 | 0.47300711 |
| Rps16       | 22603.9463 | -0.2700471 | 0.21339128 | -1.2655021 | 0.20569138 | 0.49055804 |
| Il6st       | 6933.42438 | -0.2701432 | 0.24282144 | -1.1125177 | 0.2659156  | 0.55798861 |
| Foxn3       | 962.630429 | -0.2701569 | 0.26601203 | -1.0155814 | 0.30982879 | 0.60461696 |
| Cirbp       | 2228.46512 | -0.2703093 | 0.20204422 | -1.3378719 | 0.1809382  | 0.45954106 |
| Lrrc3b      | 11.9662322 | -0.2705454 | 0.43212027 | -0.6260881 | 0.53125715 | 0.7782358  |
| Klf16       | 2934.99512 | -0.2705867 | 0.19172244 | -1.411346  | 0.15814262 | 0.42829606 |
| Pcolce2     | 2151.58171 | -0.2706361 | 0.27957093 | -0.9680408 | 0.33302401 | 0.62622205 |
| Kat7        | 15485.3058 | -0.2708992 | 0.19765933 | -1.3705358 | 0.17051972 | 0.44607049 |
| Aoc2        | 169.256534 | -0.2709462 | 0.24261537 | -1.1167725 | 0.26409159 | 0.55578402 |
| Tmsb4x      | 7021.00858 | -0.2709643 | 0.29506033 | -0.9183354 | 0.35844331 | 0.64959011 |
| Ccnf        | 15620.5517 | -0.2710206 | 0.19802838 | -1.3685948 | 0.17112597 | 0.44725713 |
| Kcnn2       | 215.832388 | -0.2710483 | 0.31898605 | -0.8497183 | 0.39548171 | 0.68263121 |
| Fundc1      | 1608.93871 | -0.2710708 | 0.20409062 | -1.3281884 | 0.18411589 | 0.4644599  |
| Hist2h2bb   | 4.37539749 | -0.2711126 | 0.40393606 | -0.6711769 | 0.50210782 | NA         |
| Pten        | 4945.78473 | -0.2712293 | 0.24937761 | -1.0876249 | 0.27676073 | 0.56928593 |
| Ncapd3      | 7155.09667 | -0.2713017 | 0.19400863 | -1.3983999 | 0.16199301 | 0.43326619 |
| Rph3al      | 169.253367 | -0.2714054 | 0.33708556 | -0.8051527 | 0.42073155 | 0.70091929 |
| Kif24       | 1425.62592 | -0.2714067 | 0.21577293 | -1.2578348 | 0.2084515  | 0.4943015  |
| Chtf18      | 5522.7884  | -0.2714259 | 0.21004432 | -1.2922315 | 0.19627698 | 0.47933634 |
| Hdac4       | 908.090592 | -0.2715489 | 0.27936829 | -0.9720106 | 0.33104527 | 0.62428641 |

|             |            |            |            |            |            |            |
|-------------|------------|------------|------------|------------|------------|------------|
| Emp1        | 1426.42784 | -0.2715968 | 0.24510379 | -1.1080891 | 0.26782333 | 0.56063005 |
| Phactr4     | 2803.14654 | -0.2717117 | 0.23365818 | -1.1628599 | 0.24488634 | 0.53773334 |
| 4932416H05I | 84.4922625 | -0.2717749 | 0.33673384 | -0.807091  | 0.41961403 | 0.70015213 |
| Dhx15       | 27974.8281 | -0.2718366 | 0.17680244 | -1.5375161 | 0.12416699 | 0.37632446 |
| B4galnt2    | 504.500794 | -0.2719085 | 0.30607898 | -0.8883605 | 0.37434688 | 0.66402058 |
| Net1        | 4647.85147 | -0.2719336 | 0.16397726 | -1.6583614 | 0.09724455 | 0.32598491 |
| Vars        | 14231.4258 | -0.2719852 | 0.20570848 | -1.3221875 | 0.18610573 | 0.46671992 |
| Ripk3       | 1180.06989 | -0.2719954 | 0.17546132 | -1.550173  | 0.12110001 | 0.37042216 |
| Lemd1       | 7.53203076 | -0.2719985 | 0.41875026 | -0.6495482 | 0.5159841  | 0.76711938 |
| Ict1        | 2542.10978 | -0.2720696 | 0.21575992 | -1.2609832 | 0.20731489 | 0.4927277  |
| Pign        | 2538.99991 | -0.2721072 | 0.18972166 | -1.4342442 | 0.15150258 | 0.41869854 |
| 4933406C10F | 5.10826255 | -0.2722215 | 0.36259414 | -0.750761  | 0.4527965  | NA         |
| Zranb3      | 4707.838   | -0.2725255 | 0.15334421 | -1.7772141 | 0.07553302 | 0.28120995 |
| Ttc27       | 5376.80571 | -0.2725811 | 0.16759904 | -1.6263879 | 0.10386717 | 0.33919327 |
| Snord12     | 478.140518 | -0.2727231 | 0.25363789 | -1.0752457 | 0.28226474 | 0.57469219 |
| Trim43c     | 3.17984717 | -0.2727376 | 0.36193819 | -0.7535473 | 0.4511211  | NA         |
| Mks1        | 2438.70551 | -0.2729679 | 0.18149621 | -1.5039867 | 0.13258479 | 0.38909721 |
| Zfp385b     | 34.0570957 | -0.272972  | 0.43087267 | -0.6335328 | 0.52638574 | 0.77414646 |
| Slc18b1     | 1033.09966 | -0.272986  | 0.24156592 | -1.1300683 | 0.25844744 | 0.55101675 |
| Hsp90ab1    | 372102.434 | -0.2730394 | 0.19811207 | -1.378207  | 0.16813938 | 0.44308872 |
| Usp33       | 7675.70464 | -0.2731324 | 0.16688055 | -1.6366938 | 0.10169446 | 0.33491118 |
| Prkd3       | 4809.86999 | -0.2731472 | 0.20710603 | -1.3188761 | 0.18721053 | 0.46836678 |
| Pim3        | 6275.56219 | -0.2734567 | 0.20600327 | -1.3274384 | 0.18436371 | 0.4644599  |
| Ppt1        | 4440.95159 | -0.2736312 | 0.1483591  | -1.8443843 | 0.06512716 | 0.2584176  |
| Senp6       | 7952.56515 | -0.2739362 | 0.17800149 | -1.5389546 | 0.12381539 | 0.37568579 |
| Sec24a      | 2632.19238 | -0.2739559 | 0.2748966  | -0.9965779 | 0.31896945 | 0.61284294 |
| Maob        | 1.61982118 | -0.2739978 | 0.27147923 | -1.0092772 | 0.3128417  | NA         |
| Them6       | 502.960445 | -0.2740764 | 0.27896396 | -0.9824796 | 0.32586363 | 0.61926293 |
| Gne         | 893.338459 | -0.2742179 | 0.19826371 | -1.3830969 | 0.16663515 | 0.44115479 |
| Zfp61       | 1171.24241 | -0.2742258 | 0.21075706 | -1.3011467 | 0.19320826 | 0.47593318 |
| Agpat9      | 814.764346 | -0.2742613 | 0.26643623 | -1.0293695 | 0.30330606 | 0.59849162 |
| 5031439G07I | 2250.15418 | -0.2743792 | 0.15913273 | -1.7242159 | 0.08466887 | 0.30178446 |
| C2cd5       | 3744.30318 | -0.2744614 | 0.20214755 | -1.3577283 | 0.17454991 | 0.45195232 |
| Hist1h2ak   | 4.45162373 | -0.2746114 | 0.37348314 | -0.7352711 | 0.46217442 | NA         |
| Hiat1       | 9627.57041 | -0.2746175 | 0.16949097 | -1.6202489 | 0.10517883 | 0.34146388 |
| A630089N07  | 443.500141 | -0.2746245 | 0.36552107 | -0.7513233 | 0.45245812 | 0.72418447 |
| Acot11      | 663.856525 | -0.2747045 | 0.26800009 | -1.0250166 | 0.30535536 | 0.5998713  |
| Rae1        | 7101.88237 | -0.2747227 | 0.16041614 | -1.7125625 | 0.08679305 | 0.30640337 |
| Nop56       | 24818.1413 | -0.2747409 | 0.18275159 | -1.503357  | 0.13274702 | 0.38949979 |
| Oat         | 9580.46216 | -0.2748966 | 0.17057347 | -1.6116024 | 0.10704848 | 0.34516082 |
| Uprt        | 64.8384289 | -0.2749284 | 0.36362256 | -0.7560817 | 0.44960021 | 0.72235184 |



|             |            |            |            |            |            |            |
|-------------|------------|------------|------------|------------|------------|------------|
| Slc25a26    | 742.407256 | -0.2749761 | 0.1956231  | -1.405642  | 0.15983044 | 0.43106542 |
| Blnk        | 244.988653 | -0.2749824 | 0.37738025 | -0.7286612 | 0.46620891 | 0.73498824 |
| Fkrp        | 558.184206 | -0.2749893 | 0.22409373 | -1.2271175 | 0.21977844 | 0.50829485 |
| Suco        | 5157.23287 | -0.2749991 | 0.17794792 | -1.5453908 | 0.12225175 | 0.37269888 |
| Cdc7        | 5284.95421 | -0.2751602 | 0.18235026 | -1.5089653 | 0.13130766 | 0.38745025 |
| Myo18a      | 4969.82504 | -0.2751861 | 0.1751803  | -1.5708736 | 0.11621201 | 0.36215582 |
| Ube3b       | 4322.04435 | -0.2752036 | 0.23331026 | -1.1795606 | 0.23817502 | 0.53018318 |
| Cep83       | 5482.404   | -0.2753345 | 0.17427887 | -1.5798503 | 0.11414116 | 0.35801802 |
| Pef1        | 2278.83599 | -0.2753513 | 0.19417234 | -1.4180767 | 0.15616838 | 0.42502178 |
| Spred2      | 2006.47544 | -0.2754273 | 0.28257792 | -0.9746951 | 0.32971153 | 0.62303576 |
| Arhgap32    | 3475.35761 | -0.2754899 | 0.34032934 | -0.8094802 | 0.418239   | 0.6990579  |
| Ankrd28     | 7624.35311 | -0.2755402 | 0.18986359 | -1.4512536 | 0.14670925 | 0.41107668 |
| Agk         | 2135.15304 | -0.2756565 | 0.19782913 | -1.3934073 | 0.16349667 | 0.43566427 |
| Palm3       | 3812.29185 | -0.275723  | 0.18215138 | -1.5137024 | 0.13010135 | 0.38573995 |
| Lztr1       | 1986.60673 | -0.2757462 | 0.18680202 | -1.4761412 | 0.13990598 | 0.39979382 |
| Arid1b      | 3047.83288 | -0.2757805 | 0.24008695 | -1.1486694 | 0.25069232 | 0.54423089 |
| Gtse1       | 10319.019  | -0.2758256 | 0.25096771 | -1.0990481 | 0.27174711 | 0.56526742 |
| Mal2        | 8.81118819 | -0.2758956 | 0.42795632 | -0.6446816 | 0.51913353 | 0.76930108 |
| B130006D01I | 3.41510583 | -0.2759893 | 0.37426878 | -0.7374094 | 0.4608734  | NA         |
| Otop2       | 2.11339503 | -0.2760801 | 0.28688606 | -0.9623335 | 0.33588213 | NA         |
| Ppp2r5c     | 16017.2057 | -0.276101  | 0.16104544 | -1.7144291 | 0.08644995 | 0.30564466 |
| G530011O06  | 3.88351821 | -0.2762036 | 0.3707461  | -0.7449941 | 0.4562753  | NA         |
| Hells       | 33136.8061 | -0.276258  | 0.191319   | -1.4439654 | 0.14874871 | 0.41375216 |
| Arid3b      | 4105.26184 | -0.2763655 | 0.213784   | -1.2927324 | 0.19610363 | 0.47919666 |
| Galnt1      | 9535.03444 | -0.2763704 | 0.21294156 | -1.2978699 | 0.19433204 | 0.47696616 |
| Set         | 62216.735  | -0.2764124 | 0.186135   | -1.4850101 | 0.13754114 | 0.39616638 |
| Slc4a7      | 3645.19929 | -0.2764756 | 0.28856358 | -0.95811   | 0.33800731 | 0.63124194 |
| Gcgr        | 21.3550551 | -0.276488  | 0.43123112 | -0.6411597 | 0.52141891 | 0.77019239 |
| Ntan1       | 2899.82587 | -0.2764902 | 0.19067087 | -1.4500912 | 0.14703309 | 0.41153915 |
| Ppp1cb      | 26515.5308 | -0.2764931 | 0.20167332 | -1.3709948 | 0.17037658 | 0.44589804 |
| Ubr7        | 12509.4588 | -0.2766477 | 0.19611981 | -1.4106054 | 0.15836099 | 0.42858888 |
| Pygo1       | 173.145536 | -0.2768245 | 0.31545189 | -0.877549  | 0.38018851 | 0.66904058 |
| Pptc7       | 2754.29662 | -0.2768635 | 0.18946272 | -1.4613083 | 0.14393085 | 0.40567894 |
| Vmn1r210    | 1.31193935 | -0.276913  | 0.24488649 | -1.130781  | 0.25814729 | NA         |
| Mpp7        | 2631.70831 | -0.2769568 | 0.17996428 | -1.5389543 | 0.12381546 | 0.37568579 |
| Klf13       | 3920.03911 | -0.2770771 | 0.22463024 | -1.2334806 | 0.2173965  | 0.50511474 |
| Senp1       | 4912.11495 | -0.2770792 | 0.21991721 | -1.2599249 | 0.20769644 | 0.49332568 |
| Zmiz2       | 5427.39946 | -0.2771393 | 0.2485347  | -1.115093  | 0.26481059 | 0.5564253  |
| 4931428L18F | 2.05373746 | -0.2773121 | 0.3236919  | -0.8567161 | 0.39160182 | NA         |
| Tusc3       | 2509.93029 | -0.2773126 | 0.28026031 | -0.9894824 | 0.32242719 | 0.61681205 |
| Zfp955a     | 1558.20952 | -0.2773874 | 0.21110677 | -1.3139672 | 0.18885724 | 0.47028325 |

|             |            |            |            |            |            |            |
|-------------|------------|------------|------------|------------|------------|------------|
| Ncor2       | 4757.93186 | -0.2774327 | 0.25094729 | -1.1055419 | 0.26892485 | 0.56201096 |
| Ctsz        | 2358.95951 | -0.2774604 | 0.23395713 | -1.1859455 | 0.23564383 | 0.52749347 |
| Cecr2       | 5553.94329 | -0.2775076 | 0.22697867 | -1.2226153 | 0.22147503 | 0.50971707 |
| 2700097009l | 1703.46304 | -0.2777847 | 0.21498338 | -1.2921218 | 0.19631496 | 0.47933634 |
| Ddx6        | 20014.8505 | -0.2778245 | 0.21221577 | -1.3091604 | 0.19048003 | 0.47243998 |
| Ceacam2     | 20.6463597 | -0.2779158 | 0.43059302 | -0.6454256 | 0.51865143 | 0.76873317 |
| Gosr1       | 3020.8829  | -0.2781314 | 0.20236341 | -1.3744155 | 0.16931274 | 0.44438521 |
| Tepp        | 23.653924  | -0.2782613 | 0.42223797 | -0.6590153 | 0.50988597 | 0.76423377 |
| Ap5b1       | 97.6050845 | -0.2783939 | 0.32330753 | -0.8610807 | 0.3891936  | 0.67794934 |
| Rgn         | 11.3257133 | -0.2784912 | 0.42644011 | -0.6530606 | 0.51371724 | 0.76592775 |
| Erlin2      | 5793.96239 | -0.2785325 | 0.20790862 | -1.3396873 | 0.18034702 | 0.45896455 |
| Cmss1       | 1408.00556 | -0.2785369 | 0.20598448 | -1.3522226 | 0.17630411 | 0.45380054 |
| Sco1        | 2441.00508 | -0.2785982 | 0.18121577 | -1.5373837 | 0.12419937 | 0.37634926 |
| Nln         | 4281.2015  | -0.2787092 | 0.20145491 | -1.3834817 | 0.1665172  | 0.44106779 |
| Nipal3      | 2178.08367 | -0.2789262 | 0.17027158 | -1.6381252 | 0.10139559 | 0.33428086 |
| Clec10a     | 12.887526  | -0.279089  | 0.43041704 | -0.6484153 | 0.51671639 | 0.767621   |
| Syncrip     | 22475.9519 | -0.2792802 | 0.19341256 | -1.4439609 | 0.14874996 | 0.41375216 |
| F5          | 16.5264042 | -0.2793292 | 0.42663657 | -0.6547239 | 0.51264554 | 0.76537546 |
| L3mbtl3     | 537.012006 | -0.279374  | 0.30595214 | -0.9131296 | 0.36117437 | 0.65193633 |
| Rdh7        | 26.4927152 | -0.2795591 | 0.43193952 | -0.6472183 | 0.51749069 | 0.76803758 |
| Mapk13      | 470.274428 | -0.2797665 | 0.30745598 | -0.9099401 | 0.3628541  | 0.65337545 |
| Tmem72      | 3.14551241 | -0.2798038 | 0.27524066 | -1.0165789 | 0.3093538  | NA         |
| Gstk1       | 71.7528781 | -0.2798225 | 0.35527556 | -0.7876211 | 0.43091835 | 0.70680426 |
| Cyp4f40     | 6.08561877 | -0.2798285 | 0.38985495 | -0.7177758 | 0.47289553 | 0.73930088 |
| Prpf3       | 6769.38274 | -0.2798434 | 0.20712131 | -1.3511087 | 0.17666063 | 0.45416588 |
| Actr6       | 2308.53969 | -0.2799332 | 0.18034486 | -1.5522105 | 0.12061186 | 0.36940975 |
| Cct6b       | 293.475066 | -0.2800497 | 0.40988769 | -0.6832352 | NA         | NA         |
| Car8        | 1665.17732 | -0.2801555 | 0.33104495 | -0.8462763 | 0.39739864 | 0.68347116 |
| Dbf4        | 13811.7107 | -0.2802104 | 0.15179914 | -1.8459288 | 0.06490254 | 0.25812811 |
| Mapk8ip3    | 2699.00902 | -0.2803345 | 0.20358632 | -1.3769809 | 0.16851816 | 0.44336524 |
| Gpatch4     | 2819.19865 | -0.2804208 | 0.20943779 | -1.3389219 | 0.18059609 | 0.45932388 |
| Tpm4        | 10207.028  | -0.2804713 | 0.17431854 | -1.6089584 | 0.10762544 | 0.34644655 |
| Gm10778     | 22.0344648 | -0.2804792 | 0.42619081 | -0.658107  | 0.51046937 | 0.76464545 |
| Wdr34       | 1695.89273 | -0.2804904 | 0.19544242 | -1.4351564 | 0.15124255 | 0.41838967 |
| Slc25a35    | 391.990988 | -0.2805512 | 0.28651492 | -0.9791854 | 0.3274884  | 0.62076695 |
| Rcn2        | 3433.13938 | -0.2807144 | 0.18558799 | -1.5125676 | 0.13038954 | 0.38629982 |
| Igfbp6      | 6.2492808  | -0.2807688 | 0.40137437 | -0.6995185 | 0.48422803 | 0.74704664 |
| Akap9       | 2962.46719 | -0.2808446 | 0.25440993 | -1.1039059 | 0.26963395 | 0.56260264 |
| BC030499    | 18.7360604 | -0.2808759 | 0.42394627 | -0.6625271 | 0.50763344 | 0.76279908 |
| 1500015A07f | 311.812915 | -0.2808887 | 0.37516942 | -0.7486984 | 0.45403901 | 0.72499853 |
| Spink2      | 11.1615445 | -0.2811531 | 0.42938064 | -0.6547876 | 0.51260452 | 0.76537546 |

|             |            |            |            |            |            |            |
|-------------|------------|------------|------------|------------|------------|------------|
| Tyro3       | 6952.01615 | -0.2812322 | 0.19839117 | -1.417564  | 0.15631808 | 0.42521829 |
| Alpl2       | 14.4834342 | -0.2815912 | 0.42594028 | -0.6611048 | 0.50854508 | 0.76357423 |
| 9430015G10l | 3118.07111 | -0.2816315 | 0.2118429  | -1.3294355 | 0.18370433 | 0.46398992 |
| Ddx52       | 6008.04    | -0.281805  | 0.20806662 | -1.3543979 | 0.17560947 | 0.45318667 |
| Prdm10      | 1098.21662 | -0.2818773 | 0.25821397 | -1.0916423 | 0.27499038 | 0.5675013  |
| Xab2        | 7046.04321 | -0.2818825 | 0.1736841  | -1.6229607 | 0.1045978  | 0.33994888 |
| Ccr7        | 12.0845946 | -0.2818843 | 0.4314072  | -0.6534065 | 0.51349428 | 0.76592775 |
| Haus7       | 2557.9683  | -0.2820026 | 0.19002368 | -1.4840392 | 0.13779853 | 0.39657388 |
| Utp15       | 5682.90011 | -0.2820027 | 0.17572693 | -1.6047779 | 0.1085427  | 0.34810219 |
| Kifc5b      | 1940.9978  | -0.2820086 | 0.17840942 | -1.580682  | 0.11395076 | 0.35784496 |
| Trim21      | 359.902835 | -0.2820463 | 0.2157513  | -1.3072751 | 0.1911193  | 0.47328664 |
| Cul5        | 9369.03619 | -0.2821107 | 0.19175693 | -1.4711891 | 0.14123997 | 0.40171844 |
| Jrk         | 1226.83803 | -0.2821547 | 0.22633018 | -1.2466509 | 0.21252551 | 0.49916693 |
| Gm12250     | 22.554524  | -0.2822279 | 0.4319514  | -0.6533789 | 0.51351202 | 0.76592775 |
| Mff         | 5106.63354 | -0.2822396 | 0.16550689 | -1.7053044 | 0.08813767 | 0.30911795 |
| Wac         | 5529.05007 | -0.2825757 | 0.18042886 | -1.5661336 | 0.11731733 | 0.36378901 |
| Csnk1e      | 7770.86773 | -0.282678  | 0.24400887 | -1.1584742 | 0.24667057 | 0.53953931 |
| Gm14139     | 976.482214 | -0.2826952 | 0.27175919 | -1.0402414 | 0.29822777 | 0.59275818 |
| Lin7c       | 11634.1477 | -0.2827383 | 0.17656282 | -1.6013466 | 0.10930017 | 0.34930682 |
| Fra10ac1    | 1664.53086 | -0.2827493 | 0.23395992 | -1.2085374 | 0.22684062 | 0.51708161 |
| Evc2        | 930.128651 | -0.2827916 | 0.22198415 | -1.273927  | 0.20268929 | 0.48733798 |
| Narg2       | 2306.73664 | -0.2829019 | 0.17822679 | -1.587314  | 0.11244154 | 0.35490311 |
| Mrps24      | 5529.21458 | -0.2829279 | 0.23936796 | -1.1819788 | 0.23721412 | 0.52931278 |
| Yod1        | 400.227644 | -0.2829541 | 0.32670722 | -0.8660784 | 0.38644717 | 0.67531632 |
| Sppl2a      | 2673.28381 | -0.2831331 | 0.2075411  | -1.3642268 | 0.17249621 | 0.44946602 |
| Gpsm2       | 1902.33423 | -0.2831878 | 0.18069734 | -1.5671939 | 0.11706937 | 0.36345495 |
| Oas1b       | 45.4207155 | -0.283431  | 0.38476488 | -0.7366343 | 0.46134477 | 0.7316309  |
| Fam3c       | 3812.72933 | -0.283439  | 0.17094879 | -1.6580343 | 0.09731055 | 0.32600663 |
| Zic5        | 516.800416 | -0.2835101 | 0.34177354 | -0.8295263 | 0.40680665 | 0.6907895  |
| Arsi        | 3.16572784 | -0.2835221 | 0.33232302 | -0.853152  | 0.393575   | NA         |
| Abl1        | 8149.61698 | -0.2835232 | 0.19918572 | -1.4234115 | 0.1546169  | 0.42309473 |
| Hist1h2af   | 2.92547404 | -0.2835739 | 0.3134203  | -0.9047721 | 0.36558616 | NA         |
| Nf1         | 1703.41923 | -0.2836215 | 0.30519436 | -0.9293143 | 0.35272624 | 0.64439796 |
| Grik3       | 3892.50307 | -0.2836619 | 0.26126941 | -1.0857066 | 0.27760881 | 0.56992453 |
| Ywhaz       | 19189.0189 | -0.2837811 | 0.15108837 | -1.8782459 | 0.06034753 | 0.24702934 |
| Pramel7     | 1452.32293 | -0.2839322 | 0.32965153 | -0.8613101 | 0.38906729 | 0.67794934 |
| Clcn2       | 2976.66297 | -0.2839683 | 0.17859424 | -1.5900194 | 0.11183043 | 0.35361429 |
| Ptgr1       | 4007.1205  | -0.2839798 | 0.2980205  | -0.9528868 | 0.34064742 | 0.63407735 |
| Pkm         | 161506.883 | -0.2840061 | 0.24969084 | -1.1374311 | 0.25535812 | 0.54833943 |
| Zfp951      | 2932.27114 | -0.284109  | 0.23814451 | -1.1930108 | 0.23286513 | 0.52452319 |
| Rpl27       | 14936.9034 | -0.2841172 | 0.22582395 | -1.2581358 | 0.20834264 | 0.49426948 |

|            |            |            |            |            |            |            |
|------------|------------|------------|------------|------------|------------|------------|
| Erg        | 4.5592097  | -0.2842692 | 0.4001123  | -0.7104736 | 0.47741052 | NA         |
| Dgcr6      | 1471.14095 | -0.2842785 | 0.21747827 | -1.3071582 | 0.19115899 | 0.47328664 |
| Cacna2d2   | 334.422937 | -0.2845276 | 0.2652634  | -1.0726229 | 0.28344036 | 0.57580419 |
| Slc25a17   | 4061.82634 | -0.2846099 | 0.14942181 | -1.904741  | 0.05681374 | 0.23756811 |
| Slc9b1     | 1196.78213 | -0.2846297 | 0.3195506  | -0.8907188 | 0.37308006 | 0.66290767 |
| 5430421N21 | 2.71367549 | -0.2846629 | 0.32624208 | -0.872551  | 0.38290784 | NA         |
| Crabp1     | 994.353207 | -0.2846805 | 0.30057583 | -0.947117  | 0.34357916 | 0.63690736 |
| Slc26a2    | 1150.61296 | -0.2847364 | 0.2323615  | -1.2254027 | 0.22042353 | 0.50895393 |
| Uap1       | 3870.73888 | -0.2847679 | 0.17701023 | -1.6087654 | 0.10766764 | 0.34651065 |
| Pcgf1      | 880.488018 | -0.2848496 | 0.2380385  | -1.1966535 | 0.23144162 | 0.52302118 |
| Firre      | 6869.15937 | -0.2850493 | 0.18936363 | -1.505301  | 0.13224671 | 0.38856271 |
| Cnbd2      | 103.477488 | -0.2851781 | 0.33401266 | -0.8537942 | 0.39321903 | 0.6808762  |
| Zfp275     | 2319.77327 | -0.2852044 | 0.20679311 | -1.3791776 | 0.16784    | 0.44283675 |
| Rbm41      | 1148.00807 | -0.2853116 | 0.22815599 | -1.2505113 | 0.21111284 | 0.49780377 |
| Slc48a1    | 1333.5887  | -0.2853351 | 0.19969576 | -1.4288493 | 0.15304755 | 0.42075345 |
| Edil3      | 27.5057836 | -0.2853802 | 0.42761517 | -0.6673763 | 0.50453181 | 0.76045952 |
| Naa20      | 3523.06291 | -0.2854242 | 0.21757235 | -1.3118586 | 0.18956786 | 0.47129813 |
| Vkorc1l1   | 6585.87852 | -0.2855873 | 0.15141588 | -1.8861118 | 0.05927989 | 0.24420176 |
| Dusp27     | 3178.48351 | -0.2857311 | 0.27235538 | -1.0491113 | 0.29412691 | 0.58836733 |
| Parp1      | 45479.9731 | -0.2857951 | 0.22760234 | -1.2556774 | 0.20923294 | 0.49539912 |
| Hist1h2bj  | 8.28163752 | -0.2858483 | 0.41931549 | -0.6817022 | 0.49542725 | 0.75533199 |
| Mdh1       | 17051.2063 | -0.2858954 | 0.16394072 | -1.743895  | 0.0811774  | 0.29446925 |
| Copb1      | 12920.3623 | -0.2859225 | 0.14481517 | -1.9743958 | 0.04833676 | 0.21519751 |
| Tmem50a    | 3668.79087 | -0.2859246 | 0.19300083 | -1.4814681 | 0.13848189 | 0.39777094 |
| Ribc1      | 466.476481 | -0.2859447 | 0.24307138 | -1.1763816 | 0.23944244 | 0.53140707 |
| Trmt5      | 2213.9671  | -0.2861969 | 0.14923121 | -1.9178087 | 0.05513528 | 0.23325384 |
| Usp31      | 2257.5199  | -0.286385  | 0.24828922 | -1.1534329 | 0.24873274 | 0.54189448 |
| Slc1a4     | 3235.24154 | -0.2863943 | 0.30348526 | -0.9436843 | 0.34533101 | 0.63779826 |
| Fam118a    | 2553.01805 | -0.2864977 | 0.16407229 | -1.7461675 | 0.08078185 | 0.29365092 |
| Mmp17      | 1623.59354 | -0.2866508 | 0.25400329 | -1.128532  | 0.25909529 | 0.55126432 |
| Pkd1       | 1889.02428 | -0.2866918 | 0.22659304 | -1.2652278 | 0.20578967 | 0.49060786 |
| Rgmb       | 416.23063  | -0.2867061 | 0.2422004  | -1.1837557 | 0.23650977 | 0.52813949 |
| Srrm2      | 39850.9264 | -0.2867135 | 0.23261263 | -1.2325795 | 0.2177327  | 0.50559374 |
| Fbxo38     | 6746.97473 | -0.2867165 | 0.16058118 | -1.7854926 | 0.07418145 | 0.27831019 |
| Casq2      | 109.015648 | -0.2870058 | 0.33961204 | -0.8450992 | NA         | NA         |
| Endod1     | 283.918263 | -0.287074  | 0.28356917 | -1.0123596 | 0.31136617 | 0.60603215 |
| Guca1a     | 96.5808951 | -0.2871202 | 0.3638597  | -0.789096  | 0.4300559  | 0.70591084 |
| Pkp4       | 9422.11237 | -0.2872363 | 0.19306647 | -1.4877588 | 0.13681452 | 0.39489535 |
| Ankrd52    | 2203.57194 | -0.2872414 | 0.2518699  | -1.1404358 | 0.2541048  | 0.54723498 |
| Star       | 98.6200578 | -0.2873115 | 0.33046895 | -0.8694054 | 0.38462544 | 0.67387452 |
| Zfp94      | 164.611715 | -0.2873213 | 0.26276142 | -1.0934684 | 0.2741882  | 0.56699234 |

|             |            |            |            |            |            |            |
|-------------|------------|------------|------------|------------|------------|------------|
| Zfp277      | 4441.25127 | -0.2873267 | 0.18287978 | -1.5711235 | 0.11615396 | 0.36215582 |
| Cdk10       | 1444.93671 | -0.2874279 | 0.21208844 | -1.3552264 | 0.17534543 | 0.45309298 |
| B930041F14F | 635.691321 | -0.2876419 | 0.22765866 | -1.2634791 | 0.20641707 | 0.49117443 |
| Rpain       | 1524.84568 | -0.2876801 | 0.23278545 | -1.2358167 | 0.21652671 | 0.50379974 |
| Cbr1        | 1980.22987 | -0.2877613 | 0.216395   | -1.3297963 | 0.18358538 | 0.46376482 |
| Ly6g6d      | 104.449763 | -0.2878396 | 0.36201125 | -0.7951123 | 0.4265482  | 0.70402942 |
| Riok2       | 9242.38507 | -0.2878451 | 0.16421212 | -1.752886  | 0.07962158 | 0.291203   |
| Tmem219     | 428.939644 | -0.2879317 | 0.29211503 | -0.9856792 | 0.32429055 | 0.618534   |
| Hist1h2be   | 7.47423769 | -0.2883641 | 0.39500421 | -0.730028  | 0.46537305 | 0.73442422 |
| Dppa4       | 4167.61539 | -0.2884081 | 0.25097564 | -1.1491476 | 0.25049511 | 0.54405045 |
| Lclat1      | 1194.23801 | -0.2884405 | 0.21559206 | -1.3378997 | 0.18092915 | 0.45954106 |
| Khdc1c      | 20.2636704 | -0.2884436 | 0.40951736 | -0.7043501 | 0.48121475 | 0.7445399  |
| Gtf3c4      | 5391.48931 | -0.2884924 | 0.20243313 | -1.4251244 | 0.15412124 | 0.42233293 |
| Tenm4       | 2312.81131 | -0.2885957 | 0.29655125 | -0.9731729 | 0.33046736 | 0.62369343 |
| Cog2        | 2855.10195 | -0.2886313 | 0.20059344 | -1.4388869 | 0.15018256 | 0.41633446 |
| Irf2bp2     | 2832.38851 | -0.2888791 | 0.17355962 | -1.664437  | 0.09602513 | 0.32385312 |
| Gm766       | 7.42174382 | -0.2888948 | 0.39974507 | -0.7226976 | 0.46986571 | 0.73765956 |
| Cd302       | 595.9169   | -0.2891506 | 0.30937526 | -0.9346275 | 0.34998028 | 0.64198366 |
| Apol7a      | 5.66449866 | -0.289165  | 0.38375242 | -0.7535197 | 0.4511377  | NA         |
| Barhl1      | 5.2232696  | -0.2892152 | 0.39235246 | -0.7371312 | 0.46104258 | NA         |
| Psrc1       | 9759.56921 | -0.2892797 | 0.14874871 | -1.9447541 | 0.05180458 | 0.22427977 |
| Prrc2b      | 28201.084  | -0.2892835 | 0.24398177 | -1.1856767 | 0.23575    | 0.52758273 |
| Rpp30       | 2545.7642  | -0.2892967 | 0.19014335 | -1.5214663 | 0.12814287 | 0.38211884 |
| Dynlt1a     | 559.757986 | -0.2893236 | 0.2637735  | -1.0968637 | 0.27270096 | 0.56606275 |
| Zfp882      | 791.086363 | -0.2895955 | 0.29658413 | -0.9764363 | 0.32884828 | 0.62222868 |
| Znf41-ps    | 301.88249  | -0.2896213 | 0.27310636 | -1.0604709 | 0.28893044 | 0.58216601 |
| Apod        | 1455.51082 | -0.2896389 | 0.38306776 | -0.7561036 | 0.4495871  | 0.72235184 |
| Iqgap2      | 2541.4562  | -0.289697  | 0.21684669 | -1.3359529 | 0.18156468 | 0.46060561 |
| Ap1ar       | 3035.79369 | -0.2897586 | 0.19286432 | -1.5023963 | 0.13299479 | 0.38977816 |
| Cldn9       | 42.0337775 | -0.2899276 | 0.41587899 | -0.6971442 | 0.48571257 | 0.74775368 |
| Rnf112      | 7.4235564  | -0.2902117 | 0.41396744 | -0.7010496 | 0.48327204 | 0.74594178 |
| AI597479    | 3215.96751 | -0.2902768 | 0.16322596 | -1.7783742 | 0.07534242 | 0.28071011 |
| Jak2        | 1231.26637 | -0.2902865 | 0.21089641 | -1.376441  | 0.16868513 | 0.44348648 |
| Stard8      | 974.29717  | -0.2903888 | 0.23939701 | -1.213001  | 0.22512943 | 0.51458839 |
| Abcc6       | 28.255666  | -0.290437  | 0.42259977 | -0.6872625 | 0.49191733 | 0.75208002 |
| Klhl25      | 1154.95787 | -0.2904856 | 0.21423175 | -1.355941  | 0.17511794 | 0.45309298 |
| Bambi       | 789.25334  | -0.2906043 | 0.21184757 | -1.3717616 | 0.17013768 | 0.44557275 |
| Cd276       | 887.285901 | -0.2906158 | 0.27852872 | -1.0433962 | 0.29676483 | 0.59122008 |
| Cntln       | 168.483893 | -0.2908325 | 0.36494224 | -0.7969275 | 0.42549316 | 0.70377154 |
| Mecp2       | 1531.52408 | -0.2908361 | 0.1776319  | -1.6372966 | 0.10156851 | 0.33476283 |
| Serinc1     | 5804.79394 | -0.2912266 | 0.17911492 | -1.6259203 | 0.10396662 | 0.33930559 |

|            |            |            |            |            |            |            |
|------------|------------|------------|------------|------------|------------|------------|
| Gucy2e     | 21.0502674 | -0.2912391 | 0.4246849  | -0.6857769 | 0.49285379 | 0.75295896 |
| C77370     | 5287.10748 | -0.2912537 | 0.24183894 | -1.2043291 | 0.22846242 | 0.51911442 |
| Oprk1      | 2.34071733 | -0.2912843 | 0.26884723 | -1.0834564 | 0.27860588 | NA         |
| Mapk8      | 3484.44504 | -0.2914204 | 0.21420299 | -1.3604869 | 0.1736759  | 0.45100512 |
| Rtn2       | 492.337157 | -0.2914454 | 0.26889815 | -1.0838505 | 0.2784311  | 0.57075699 |
| Vdac1      | 60198.2308 | -0.2915024 | 0.17031927 | -1.7115058 | 0.08698778 | 0.30681806 |
| Murc       | 102.455985 | -0.2916265 | 0.34763111 | -0.8388964 | 0.40152743 | 0.68662338 |
| Cstb       | 11121.3534 | -0.2916546 | 0.25144464 | -1.1599157 | 0.24608314 | 0.53921924 |
| Gtpbp1     | 5513.25768 | -0.2917572 | 0.1969371  | -1.4814738 | 0.13848035 | 0.39777094 |
| Baz2b      | 7104.9418  | -0.2917972 | 0.22811179 | -1.2791852 | 0.20083186 | 0.48458281 |
| 1700030M09 | 5.22613473 | -0.2918097 | 0.39254628 | -0.7433766 | 0.45725371 | NA         |
| Mr1        | 31.2067283 | -0.2918486 | 0.43030807 | -0.6782317 | 0.49762481 | 0.75633679 |
| Snhg4      | 1985.029   | -0.2918778 | 0.17884256 | -1.6320375 | 0.10267158 | 0.33684508 |
| Gzmm       | 64.6667157 | -0.2919721 | 0.32942917 | -0.886297  | 0.37545752 | 0.66530764 |
| Gpatch1    | 1878.55773 | -0.2920654 | 0.1791025  | -1.6307164 | 0.10295018 | 0.33719106 |
| C4a        | 70.1650532 | -0.2920892 | 0.33958431 | -0.8601374 | 0.38971333 | 0.67799188 |
| Papolg     | 3768.107   | -0.2920928 | 0.22220738 | -1.3145053 | 0.18867622 | 0.47005829 |
| Sec24c     | 5857.69844 | -0.2921922 | 0.25590638 | -1.1417935 | 0.25353987 | 0.54626394 |
| Pcmt2      | 1938.19222 | -0.2922971 | 0.19097078 | -1.5305852 | 0.12587194 | 0.37885621 |
| Zfp111     | 1542.80642 | -0.2923948 | 0.25866877 | -1.1303832 | 0.2583148  | 0.55088501 |
| Srp68      | 7297.38262 | -0.2924772 | 0.16835938 | -1.7372195 | 0.08234844 | 0.29691219 |
| C2cd2l     | 713.184746 | -0.2924879 | 0.19304471 | -1.5151303 | 0.12973941 | 0.38510738 |
| Dip2c      | 1510.83214 | -0.2925357 | 0.20992818 | -1.3935037 | 0.16346753 | 0.43566129 |
| Bcl7c      | 709.015591 | -0.2925405 | 0.18624987 | -1.5706885 | 0.11625502 | 0.36215582 |
| Nt5c3b     | 2457.05071 | -0.2926346 | 0.22048292 | -1.3272439 | 0.184428   | 0.4644599  |
| Proser1    | 2201.69563 | -0.2926811 | 0.24644561 | -1.1876092 | 0.2349874  | 0.52693426 |
| Dhx35      | 2943.05429 | -0.2927226 | 0.17242863 | -1.6976451 | 0.08957476 | 0.31135715 |
| Synj2      | 377.299946 | -0.2927327 | 0.29271784 | -1.0000508 | 0.31728591 | 0.61159656 |
| Ptprg      | 4711.98332 | -0.2927788 | 0.26779478 | -1.0932954 | 0.27426412 | 0.56699234 |
| Atp13a3    | 15033.1681 | -0.2928129 | 0.22550148 | -1.2984965 | 0.19411676 | 0.47681405 |
| Prdx4      | 4366.9449  | -0.2931914 | 0.19169883 | -1.5294375 | 0.12615602 | 0.37917514 |
| Lin52      | 901.737393 | -0.2931932 | 0.18867819 | -1.5539325 | 0.12020051 | 0.36901616 |
| Snord45b   | 43.4336854 | -0.2932185 | 0.38559304 | -0.7604352 | 0.44699451 | 0.72037167 |
| Rex2       | 4.68779044 | -0.2932202 | 0.397867   | -0.7369805 | 0.46113422 | NA         |
| Usp7       | 41027.2374 | -0.2932949 | 0.16405465 | -1.7877877 | 0.07381026 | 0.27731901 |
| Pram1      | 39.0562424 | -0.2934455 | 0.42152846 | -0.6961464 | 0.48633715 | 0.7479826  |
| Pdcl3      | 4062.62229 | -0.2935328 | 0.16408412 | -1.7889166 | 0.07362826 | 0.27716036 |
| Hnrnpf     | 10514.9258 | -0.2935621 | 0.14081087 | -2.0847971 | 0.03708772 | 0.18257395 |
| Gorab      | 1115.73328 | -0.2936763 | 0.18312457 | -1.603697  | 0.10878086 | 0.34857843 |
| Vwa5a      | 2167.86834 | -0.2936907 | 0.26118777 | -1.1244429 | 0.26082516 | 0.55289719 |
| Card10     | 601.661239 | -0.2937825 | 0.28286704 | -1.0385886 | 0.29899612 | 0.59367833 |

|             |            |            |            |            |            |            |
|-------------|------------|------------|------------|------------|------------|------------|
| Znhit6      | 2887.56775 | -0.2938348 | 0.17767681 | -1.6537602 | 0.09817624 | 0.32769667 |
| 9130221H12I | 323.518331 | -0.293864  | 0.20748455 | -1.4163174 | 0.15668261 | 0.4258251  |
| Gpd2        | 7891.75604 | -0.2940299 | 0.26775904 | -1.0981139 | 0.27215477 | 0.56560113 |
| Stc1        | 5.67449285 | -0.2940864 | 0.39340128 | -0.7475481 | 0.45473276 | NA         |
| Fbxl5       | 8393.24462 | -0.2941005 | 0.17764067 | -1.6555921 | 0.09780446 | 0.32673623 |
| Atpaf1      | 676.975998 | -0.2941517 | 0.21055291 | -1.3970441 | 0.16240032 | 0.43385798 |
| Vps41       | 10680.0028 | -0.2941851 | 0.16442453 | -1.7891799 | 0.07358585 | 0.27714546 |
| Mkrn2       | 3179.15272 | -0.2942279 | 0.17697353 | -1.6625533 | 0.09640188 | 0.32434998 |
| Birc6       | 11007.5221 | -0.294231  | 0.27686813 | -1.0627118 | 0.28791269 | 0.58147146 |
| Ruvbl2      | 13088.3032 | -0.2942362 | 0.23807928 | -1.2358748 | 0.21650509 | 0.50379974 |
| Kcnk1       | 1437.08068 | -0.2942561 | 0.19654099 | -1.4971742 | 0.13434794 | 0.39168943 |
| Yme1l1      | 21045.5186 | -0.2942805 | 0.16879132 | -1.7434577 | 0.0812537  | 0.29463847 |
| Ctc1        | 9461.9946  | -0.2943347 | 0.20410382 | -1.4420833 | 0.14927888 | 0.41476433 |
| Gabre       | 14.3322562 | -0.294383  | 0.43000504 | -0.6846037 | 0.49359402 | 0.75389732 |
| 2410007B07F | 4220.65696 | -0.2943959 | 0.19209259 | -1.5325728 | 0.12538115 | 0.37863766 |
| Arf1        | 20483.6415 | -0.2944355 | 0.15238227 | -1.9322164 | 0.0533328  | 0.22885717 |
| Fastkd2     | 4184.14392 | -0.2944576 | 0.15723261 | -1.8727518 | 0.06110267 | 0.24894096 |
| Rps19       | 32842.7636 | -0.2945046 | 0.22446078 | -1.3120536 | 0.18950207 | 0.47128524 |
| Rb1cc1      | 2930.69011 | -0.2945478 | 0.2249394  | -1.3094541 | 0.19038058 | 0.47233702 |
| Lrrc38      | 10.721663  | -0.2946505 | 0.39061667 | -0.7543214 | 0.45065624 | 0.72293741 |
| Exosc7      | 3091.52782 | -0.2946516 | 0.17986794 | -1.6381552 | 0.10138933 | 0.33428086 |
| Kras        | 6103.34647 | -0.2947446 | 0.18868984 | -1.5620588 | 0.11827415 | 0.36545911 |
| Tbc1d14     | 3783.27337 | -0.2947543 | 0.18156641 | -1.6233969 | 0.10450458 | 0.3398475  |
| Clic1       | 6021.97198 | -0.294755  | 0.20994344 | -1.4039732 | 0.16032682 | 0.43166    |
| Klhdc4      | 3468.79824 | -0.2947718 | 0.33529376 | -0.879145  | 0.37932265 | 0.66834881 |
| Rsl1        | 444.05084  | -0.2948215 | 0.26441697 | -1.1149869 | 0.26485604 | 0.55644099 |
| E030011O05I | 146.63338  | -0.2948277 | 0.30229652 | -0.975293  | 0.32941492 | 0.6228245  |
| Epn2        | 8737.25556 | -0.2948971 | 0.22983458 | -1.2830839 | 0.19946267 | 0.48250548 |
| Msl1        | 4057.09557 | -0.2949678 | 0.17003438 | -1.7347539 | 0.08278441 | 0.29800471 |
| Ewsr1       | 25841.8686 | -0.2951251 | 0.16958169 | -1.7403123 | 0.0818042  | 0.29577705 |
| Fut1        | 10.0827503 | -0.2953153 | 0.43225097 | -0.6832034 | 0.49447832 | 0.7544987  |
| Mir6392     | 3.07342135 | -0.2954083 | 0.34291152 | -0.861471  | 0.38897866 | NA         |
| Copg1       | 12506.4587 | -0.2955072 | 0.18277978 | -1.6167388 | 0.10593468 | 0.34270652 |
| Scn3a       | 498.446909 | -0.2956564 | 0.41897851 | -0.7056601 | NA         | NA         |
| Zfp418      | 613.822726 | -0.2956812 | 0.20940404 | -1.4120129 | 0.15794617 | 0.42791306 |
| Magohb      | 1280.01585 | -0.2957053 | 0.22605393 | -1.3081184 | 0.19083317 | 0.47300711 |
| 4930558C23F | 38.5573019 | -0.2957152 | 0.41903688 | -0.7057021 | 0.48037341 | 0.74407463 |
| Zfp961      | 11509.9525 | -0.295746  | 0.21591158 | -1.3697554 | 0.17076328 | 0.44653435 |
| Thoc5       | 5839.89609 | -0.295814  | 0.17930746 | -1.6497586 | 0.09899231 | 0.32906946 |
| Tmem214     | 3408.06588 | -0.2958386 | 0.1747311  | -1.6931078 | 0.09043496 | 0.31328893 |
| Ttc26       | 1163.96643 | -0.2959404 | 0.18101262 | -1.6349159 | 0.10206668 | 0.33556847 |

|          |            |            |            |            |            |            |
|----------|------------|------------|------------|------------|------------|------------|
| Rpl23a   | 41348.8945 | -0.296148  | 0.24883244 | -1.1901503 | 0.2339873  | 0.52565461 |
| Myo9b    | 6734.89575 | -0.296298  | 0.21917215 | -1.3518961 | 0.17640856 | 0.45396269 |
| Nfatc3   | 7358.42149 | -0.2964609 | 0.23875699 | -1.2416845 | 0.21435297 | 0.50148986 |
| Braf     | 2994.94181 | -0.2964856 | 0.21464024 | -1.3813141 | 0.16718241 | 0.44179059 |
| Cops5    | 9908.72464 | -0.2966244 | 0.15824569 | -1.874455  | 0.06086774 | 0.24837426 |
| Tmem11   | 2973.60825 | -0.2967655 | 0.20984056 | -1.414243  | 0.15729058 | 0.42688059 |
| Aptx     | 1098.41404 | -0.2967724 | 0.19936269 | -1.4886056 | 0.13659125 | 0.39481981 |
| Nfe2l1   | 21673.8922 | -0.2968117 | 0.19724058 | -1.5048204 | 0.13237025 | 0.38876105 |
| Ing5     | 5395.28712 | -0.2968894 | 0.15879072 | -1.8696896 | 0.06152693 | 0.24981862 |
| Srgn     | 396.324837 | -0.2968943 | 0.35521398 | -0.8358181 | 0.40325725 | 0.68761552 |
| Hebp2    | 212.021269 | -0.2972364 | 0.35004869 | -0.8491287 | 0.39580968 | 0.68276647 |
| Nadsyn1  | 617.298811 | -0.2972863 | 0.22737752 | -1.3074567 | 0.19105766 | 0.47327941 |
| Ppp1r9a  | 790.270543 | -0.2973108 | 0.27110805 | -1.0966505 | 0.2727942  | 0.56606275 |
| Tex14    | 4928.82224 | -0.2973479 | 0.20526597 | -1.4485982 | 0.14744982 | 0.41204462 |
| Hsd17b11 | 1668.71343 | -0.2973973 | 0.18868539 | -1.5761541 | 0.11499028 | 0.35980159 |
| Wdr89    | 1222.07913 | -0.2974418 | 0.22992481 | -1.293648  | 0.19578704 | 0.47884164 |
| Ubl4     | 1078.52281 | -0.2974745 | 0.17741774 | -1.6766894 | 0.09360323 | 0.3186567  |
| Cbr2     | 7.33422569 | -0.2975858 | 0.29173464 | -1.0200564 | NA         | NA         |
| Gins2    | 3611.88043 | -0.2976059 | 0.16850928 | -1.7661098 | 0.07737743 | 0.28561324 |
| Lgi2     | 398.358382 | -0.2976524 | 0.4064523  | -0.7323183 | 0.46397433 | 0.73363141 |
| Fam71f2  | 14.6397905 | -0.2977795 | 0.43222799 | -0.6889408 | 0.49086055 | 0.75176014 |
| Nsmce2   | 3462.68232 | -0.2978445 | 0.16224594 | -1.8357592 | 0.06639329 | 0.26121826 |
| Ift88    | 1104.16213 | -0.2979295 | 0.22519672 | -1.3229744 | 0.18584388 | 0.46651464 |
| Zc3h14   | 10725.8304 | -0.2981743 | 0.16303772 | -1.8288668 | 0.06741957 | 0.26349376 |
| Mbtd1    | 8983.68613 | -0.298313  | 0.21689285 | -1.3753936 | 0.16900945 | 0.44394407 |
| Pak4     | 5432.97846 | -0.2986136 | 0.1770036  | -1.6870483 | 0.09159406 | 0.31522522 |
| Tmem52   | 15.4857312 | -0.2986651 | 0.42514933 | -0.7024946 | 0.48237077 | 0.74506649 |
| Ccdc36   | 160.736577 | -0.2986763 | 0.32757833 | -0.9117707 | 0.36188942 | 0.65256752 |
| Kctd3    | 3907.22721 | -0.2986838 | 0.15626709 | -1.9113673 | 0.05595739 | 0.23556941 |
| Mzt1     | 6421.86027 | -0.2989456 | 0.18725675 | -1.5964478 | 0.11038886 | 0.35105463 |
| Mnd1-ps  | 9.04874901 | -0.2989517 | 0.42034201 | -0.7112107 | 0.47695368 | 0.7420212  |
| Dnajc2   | 14282.3817 | -0.2990089 | 0.15387184 | -1.9432332 | 0.05198799 | 0.2249486  |
| Rnf19a   | 2166.06084 | -0.2990728 | 0.20917705 | -1.4297591 | 0.15278618 | 0.42037826 |
| Mrpl12   | 6413.12766 | -0.2990892 | 0.20398581 | -1.4662256 | 0.14258683 | 0.40374504 |
| Mical1   | 2416.83988 | -0.2990977 | 0.18315392 | -1.6330403 | 0.10246052 | 0.3363451  |
| Slc25a23 | 1267.90163 | -0.2991434 | 0.23457633 | -1.2752498 | 0.20222083 | 0.48692251 |
| Atp6v1g1 | 5000.21434 | -0.2994089 | 0.26181446 | -1.1435919 | 0.25279293 | 0.54598821 |
| Gatc     | 1108.40511 | -0.2994115 | 0.20024633 | -1.4952161 | 0.13485806 | 0.39242882 |
| Gabpb1   | 3835.02569 | -0.2994293 | 0.14452568 | -2.0718071 | 0.03828343 | 0.18657026 |
| Smg6     | 4299.80642 | -0.2994967 | 0.24603549 | -1.2172905 | 0.22349371 | 0.51276935 |
| Sdha     | 21966.8714 | -0.2995234 | 0.15307594 | -1.9566983 | 0.05038296 | 0.2207437  |



|          |            |            |            |            |            |            |
|----------|------------|------------|------------|------------|------------|------------|
| Rpap1    | 9659.41149 | -0.2995281 | 0.22820891 | -1.3125171 | 0.18934573 | 0.47112247 |
| Pld1     | 518.289494 | -0.2996141 | 0.23529069 | -1.2733784 | 0.20288379 | 0.48733798 |
| Calu     | 31551.2809 | -0.2996213 | 0.18362951 | -1.6316623 | 0.10275065 | 0.33693244 |
| Srsf5    | 23913.5642 | -0.2996525 | 0.19092305 | -1.5694935 | 0.11653299 | 0.3624409  |
| Rpl18    | 49969.3039 | -0.299696  | 0.22780026 | -1.3156086 | 0.18830546 | 0.46953088 |
| Dis3     | 7772.49622 | -0.2998149 | 0.20597783 | -1.4555688 | 0.14551186 | 0.4089048  |
| Rxb      | 2696.85985 | -0.299826  | 0.19285275 | -1.5546887 | 0.12002023 | 0.36873132 |
| Slc22a18 | 265.396919 | -0.299858  | 0.41294054 | -0.726153  | 0.467745   | 0.735927   |
| Ptcd2    | 3818.06148 | -0.3000222 | 0.16522996 | -1.8157855 | 0.06940328 | 0.26821331 |
| Tmem170b | 800.859876 | -0.3000725 | 0.23602245 | -1.2713727 | 0.20359608 | 0.48825228 |
| Prrc1    | 12951.6085 | -0.3001101 | 0.16872473 | -1.7786966 | 0.07528952 | 0.28064941 |
| Gss      | 8181.67464 | -0.3001246 | 0.16701426 | -1.7969998 | 0.07233565 | 0.27429691 |
| Cacna1i  | 11.2769205 | -0.3003027 | 0.43125542 | -0.6963454 | 0.48621256 | 0.7479571  |
| Cog6     | 2300.32125 | -0.3003251 | 0.19017191 | -1.5792298 | 0.11428336 | 0.35816616 |
| Rnf145   | 4072.01576 | -0.3004344 | 0.17868677 | -1.6813468 | 0.09269558 | 0.31709391 |
| Prss8    | 812.408681 | -0.3006888 | 0.37277705 | -0.8066183 | 0.41988645 | 0.70031666 |
| Cct8     | 59848.1604 | -0.3007274 | 0.14788436 | -2.033531  | 0.0419989  | 0.19696891 |
| Acap1    | 1161.4827  | -0.3008333 | 0.43022938 | -0.6992392 | 0.48440255 | 0.74712338 |
| Uba3     | 10425.838  | -0.3008518 | 0.17824178 | -1.6878858 | 0.09143315 | 0.31492289 |
| Ddx27    | 8882.96995 | -0.3008602 | 0.18710403 | -1.6079838 | 0.10783874 | 0.34684596 |
| Cntrob   | 2684.08557 | -0.3010252 | 0.18273343 | -1.6473463 | 0.09948689 | 0.32999971 |
| Tomm20   | 11150.5729 | -0.3011588 | 0.20278278 | -1.48513   | 0.13750939 | 0.39614831 |
| Dnah7a   | 7.56091068 | -0.3011665 | 0.36252206 | -0.8307537 | 0.4061128  | 0.68991262 |
| Syne2    | 4889.784   | -0.3011737 | 0.33438604 | -0.9006768 | 0.3677602  | 0.65810136 |
| Sae1     | 23665.6473 | -0.3012037 | 0.17055178 | -1.7660544 | 0.07738672 | 0.28561324 |
| Med26    | 2047.54784 | -0.3012646 | 0.27795816 | -1.0838486 | 0.27843194 | 0.57075699 |
| Gpatch8  | 5387.67823 | -0.3013524 | 0.22874416 | -1.317421  | 0.18769756 | 0.46907513 |
| Dsc3     | 3.87429779 | -0.3013888 | 0.36733877 | -0.8204655 | 0.41195079 | NA         |
| Mta3     | 5227.403   | -0.3015509 | 0.14418913 | -2.0913565 | 0.03649612 | 0.18115263 |
| Armc9    | 802.419661 | -0.3015768 | 0.22894508 | -1.317245  | 0.18775652 | 0.4691198  |
| Prok2    | 7.72286656 | -0.3015968 | 0.33635327 | -0.8966667 | 0.36989677 | 0.66024881 |
| Drg1     | 11677.616  | -0.3015976 | 0.19267444 | -1.5653224 | 0.11750734 | 0.36401527 |
| Ralgapb  | 4556.76312 | -0.301604  | 0.21798395 | -1.3836063 | 0.16647905 | 0.44104185 |
| Dhrs7c   | 3.8358972  | -0.3016662 | 0.30438032 | -0.9910833 | 0.32164492 | NA         |
| Acat1    | 2673.64653 | -0.3017045 | 0.26773929 | -1.1268591 | 0.25980205 | 0.55186199 |
| Lrriq1   | 21.5626929 | -0.3018252 | 0.42335734 | -0.7129325 | 0.47588753 | 0.74133857 |
| Gpr162   | 86.6150957 | -0.3018754 | 0.38852703 | -0.776974  | 0.43717408 | 0.71113955 |
| Gm17066  | 3502.3622  | -0.302011  | 0.17968352 | -1.680794  | 0.09280293 | 0.31711237 |
| Fan1     | 698.333098 | -0.3020784 | 0.26106321 | -1.1571084 | 0.24722806 | 0.54012976 |
| 10-Sep   | 2838.74771 | -0.3021639 | 0.20082656 | -1.5046013 | 0.13242661 | 0.38877972 |
| Pik3c2a  | 4108.24925 | -0.3022471 | 0.22366446 | -1.3513416 | 0.17658604 | 0.45416588 |

|             |            |            |            |            |            |            |
|-------------|------------|------------|------------|------------|------------|------------|
| Slc38a3     | 130.088831 | -0.3022888 | 0.40339144 | -0.7493683 | 0.45363523 | 0.72463799 |
| Uhrf1bp1l   | 3511.69076 | -0.3024289 | 0.21318599 | -1.4186152 | 0.15601123 | 0.42474275 |
| Igj         | 3.27782211 | -0.3025639 | 0.36655607 | -0.8254233 | 0.40913132 | NA         |
| Wdhd1       | 8575.71406 | -0.3026105 | 0.2059996  | -1.468986  | 0.14183659 | 0.40253636 |
| Tlhc1       | 712.308605 | -0.3026141 | 0.24415154 | -1.2394519 | 0.2151782  | 0.50251332 |
| Etnk2       | 400.099074 | -0.3026924 | 0.28010838 | -1.080626  | 0.27986351 | 0.57228058 |
| Bai3        | 12.3905145 | -0.3027631 | 0.42977578 | -0.7044675 | 0.48114168 | 0.7445399  |
| Pou2f2      | 16.7495529 | -0.3027647 | 0.43117823 | -0.70218   | 0.48256691 | 0.74514925 |
| H2-Ke6      | 1101.35672 | -0.3030303 | 0.25677672 | -1.1801315 | 0.23794792 | 0.52998296 |
| Triml2      | 5586.67949 | -0.3031282 | 0.43180999 | -0.7019945 | NA         | NA         |
| Zfp808      | 2084.26542 | -0.3031479 | 0.1927534  | -1.5727243 | 0.11578268 | 0.36140835 |
| Mmd         | 850.985595 | -0.3032449 | 0.24907458 | -1.2174863 | 0.22341923 | 0.51267412 |
| Aars2       | 2979.64018 | -0.3032775 | 0.20066652 | -1.511351  | 0.13069905 | 0.38666893 |
| Magi2       | 55.1256121 | -0.3033572 | 0.4044582  | -0.7500336 | 0.4532345  | 0.72431158 |
| Wnk1        | 20118.2059 | -0.3034053 | 0.24909267 | -1.2180419 | 0.22320805 | 0.51226511 |
| Nfya        | 4803.00731 | -0.3035739 | 0.23474415 | -1.2932116 | 0.19593788 | 0.47901745 |
| Vps25       | 5988.02255 | -0.3036123 | 0.1960846  | -1.548374  | 0.12153227 | 0.37123324 |
| Col22a1     | 129.41502  | -0.3036458 | 0.36103609 | -0.8410399 | 0.40032557 | 0.68539722 |
| Tcf7        | 4133.14257 | -0.3036712 | 0.18482089 | -1.6430568 | 0.10037119 | 0.33188867 |
| Bfsp1       | 64.6402665 | -0.3038071 | 0.38753652 | -0.7839444 | 0.43307273 | 0.70818326 |
| 2810417H13l | 3873.53303 | -0.3040736 | 0.20399913 | -1.4905633 | 0.13607619 | 0.39391677 |
| Mir704      | 2.45788282 | -0.3041185 | 0.34601374 | -0.8789203 | 0.37944449 | NA         |
| Rabep2      | 1574.81869 | -0.3042055 | 0.18784458 | -1.619453  | 0.10534982 | 0.34173866 |
| Hvcn1       | 1905.83128 | -0.3042991 | 0.23050264 | -1.3201545 | 0.18678344 | 0.46781595 |
| Ankhd1      | 9114.05524 | -0.3043386 | 0.22374968 | -1.3601745 | 0.1737747  | 0.45100512 |
| Ii2         | 3.11322602 | -0.3043489 | 0.37551692 | -0.8104798 | 0.41766448 | NA         |
| Krba1       | 1539.11938 | -0.3043549 | 0.22916798 | -1.3280864 | 0.18414957 | 0.4644599  |
| Trim71      | 4728.64089 | -0.304394  | 0.28949044 | -1.0514819 | 0.29303731 | 0.58676317 |
| Pddc1       | 1944.05792 | -0.3046732 | 0.17402037 | -1.7507905 | 0.07998201 | 0.29183488 |
| Nxph4       | 27.7726286 | -0.3047195 | 0.43199939 | -0.7053703 | 0.48057982 | 0.74425276 |
| Cdr2l       | 1791.89158 | -0.3047466 | 0.22040546 | -1.3826637 | 0.16676801 | 0.44135625 |
| Prss40      | 4.13940747 | -0.3047999 | 0.37458201 | -0.8137068 | 0.41581296 | NA         |
| Nacc1       | 12857.7192 | -0.3049689 | 0.23832597 | -1.2796295 | 0.20067548 | 0.48443098 |
| Bri3bp      | 6842.22155 | -0.3050543 | 0.17505667 | -1.742603  | 0.08140299 | 0.29480621 |
| Nek4        | 1368.95703 | -0.3050604 | 0.19291648 | -1.5813079 | 0.11380764 | 0.35761218 |
| Slc5a3      | 632.686844 | -0.305114  | 0.28330369 | -1.0769856 | 0.2814867  | 0.5737239  |
| Utp18       | 9616.54192 | -0.305138  | 0.16717244 | -1.8252892 | 0.06795741 | 0.26474569 |
| Zbtb7a      | 2443.87408 | -0.3052567 | 0.21461165 | -1.4223677 | 0.15491953 | 0.42364842 |
| Vegfa       | 5476.55074 | -0.3054801 | 0.35179343 | -0.8683507 | 0.3852024  | 0.67435354 |
| Zfp318      | 3709.05816 | -0.305574  | 0.18895094 | -1.6172135 | 0.10583221 | 0.34251753 |
| Hao         | 19.8851639 | -0.3056265 | 0.43136859 | -0.7085042 | 0.47863221 | 0.74302874 |

|             |            |            |            |            |            |            |
|-------------|------------|------------|------------|------------|------------|------------|
| Zbtb26      | 1803.46067 | -0.3056378 | 0.2380116  | -1.2841299 | 0.19909652 | 0.48241663 |
| Ube3a       | 6042.03956 | -0.3057648 | 0.24026875 | -1.2725948 | 0.20316187 | 0.48758743 |
| Crk         | 12346.3386 | -0.3059041 | 0.19238569 | -1.5900564 | 0.1118221  | 0.35361429 |
| Tlk1        | 7329.56135 | -0.3059299 | 0.20977751 | -1.4583543 | 0.14474292 | 0.40736725 |
| 1700019E08F | 6.35313282 | -0.3059513 | 0.40683562 | -0.7520268 | 0.45203492 | 0.72396798 |
| Zmym4       | 10290.5489 | -0.3059657 | 0.19532273 | -1.5664625 | 0.11724039 | 0.36363535 |
| Prkci       | 16365.5911 | -0.30607   | 0.17386217 | -1.7604175 | 0.07833705 | 0.28826774 |
| Snord37     | 12.6079    | -0.306135  | 0.42412108 | -0.7218104 | 0.47041105 | 0.73788201 |
| Lrp6        | 4905.11262 | -0.3061727 | 0.22055714 | -1.3881787 | 0.16508263 | 0.43853774 |
| Rab7        | 4532.672   | -0.306554  | 0.1913037  | -1.6024467 | 0.10905686 | 0.34903212 |
| Ltn1        | 7216.92585 | -0.3065968 | 0.20889446 | -1.4677117 | 0.14218255 | 0.40296716 |
| Sez6        | 29.9263853 | -0.3066789 | 0.42970071 | -0.7137035 | 0.47541054 | 0.74093411 |
| Smardc1     | 12371.9512 | -0.3068085 | 0.22068874 | -1.3902317 | 0.16445854 | 0.43755257 |
| Rest        | 10565.0853 | -0.3068476 | 0.30018531 | -1.0221939 | 0.30668914 | 0.60112463 |
| Slc44a1     | 4275.39119 | -0.3068855 | 0.27444753 | -1.1181938 | 0.26348423 | 0.55541671 |
| A930016O22  | 12.2680833 | -0.3069881 | 0.43119785 | -0.7119426 | 0.47650033 | 0.74161007 |
| Cd99l2      | 847.7981   | -0.3070539 | 0.22390967 | -1.3713292 | 0.17027235 | 0.44577531 |
| D930048N14  | 399.074514 | -0.3070792 | 0.25677019 | -1.1959301 | 0.23172386 | 0.52302118 |
| Dph6        | 2500.39182 | -0.3072015 | 0.18847994 | -1.6298897 | 0.10312482 | 0.33766428 |
| A830018L16F | 694.87866  | -0.307256  | 0.29110129 | -1.055495  | 0.29119898 | 0.58491802 |
| Gemin7      | 2016.50992 | -0.3073502 | 0.21800507 | -1.4098306 | 0.1585897  | 0.4288771  |
| Nsun2       | 22820.2349 | -0.307357  | 0.18011898 | -1.7064112 | 0.08793154 | 0.30877503 |
| Grasp       | 1017.19741 | -0.3073763 | 0.22710185 | -1.3534733 | 0.17590448 | 0.4537221  |
| Stk3        | 4714.66815 | -0.3074169 | 0.23586003 | -1.3033868 | 0.19244273 | 0.47517894 |
| Prmt3       | 6559.20779 | -0.3074395 | 0.17143542 | -1.7933255 | 0.07292089 | 0.27537088 |
| Spesp1      | 76.3161985 | -0.3075207 | 0.38714276 | -0.7943341 | 0.42700097 | 0.70407759 |
| Prdx3       | 6040.58518 | -0.3076249 | 0.15397765 | -1.9978539 | 0.0457325  | 0.20779516 |
| Cnep1r1     | 2799.65533 | -0.3077267 | 0.18690003 | -1.6464778 | 0.09966542 | 0.33009875 |
| Poglut1     | 10404.2539 | -0.3078301 | 0.20490465 | -1.5023089 | 0.13301734 | 0.38977816 |
| Apool       | 1992.26918 | -0.3078662 | 0.2179063  | -1.4128377 | 0.15770346 | 0.42767192 |
| Smurf2      | 3763.79353 | -0.3079066 | 0.20512518 | -1.5010667 | 0.1333383  | 0.39033562 |
| Rpl8        | 102094.832 | -0.307926  | 0.20496399 | -1.502342  | 0.1330088  | 0.38977816 |
| Klk8        | 614.776137 | -0.3079858 | 0.34350081 | -0.8966085 | 0.36992785 | 0.66024881 |
| Eif3l       | 31058.8575 | -0.3081796 | 0.2043123  | -1.5083753 | 0.13145851 | 0.38762065 |
| Tgs1        | 5309.86834 | -0.3082352 | 0.17990351 | -1.7133362 | 0.08665071 | 0.30611204 |
| Ankle2      | 5484.36601 | -0.3082698 | 0.14845565 | -2.0765114 | 0.03784668 | 0.1850873  |
| Ppia        | 93546.3702 | -0.3083866 | 0.17963065 | -1.7167815 | 0.0860191  | 0.304642   |
| Rps6ka4     | 793.679185 | -0.3084301 | 0.2910736  | -1.0596293 | 0.28931327 | 0.58255996 |
| Cep44       | 2107.63727 | -0.3085417 | 0.2057669  | -1.4994718 | 0.13375128 | 0.39097108 |
| Armcx5      | 729.163594 | -0.308608  | 0.24153822 | -1.2776777 | 0.20136309 | 0.48541272 |
| Trak1       | 3899.25134 | -0.3087166 | 0.16164693 | -1.9098204 | 0.05615634 | 0.2360874  |

|             |            |            |            |            |            |            |
|-------------|------------|------------|------------|------------|------------|------------|
| Tpr         | 23382.9762 | -0.3087224 | 0.24603071 | -1.2548126 | 0.20954679 | 0.49577373 |
| Dimt1       | 2697.46009 | -0.30877   | 0.15782694 | -1.9563833 | 0.05042001 | 0.2207437  |
| Elovl6      | 22110.9172 | -0.3087979 | 0.23546087 | -1.3114615 | 0.18970191 | 0.4714053  |
| Gtf2h2      | 3319.655   | -0.3088395 | 0.15639193 | -1.9747791 | 0.04829323 | 0.21506529 |
| Rps3        | 129645.147 | -0.3088614 | 0.21650614 | -1.426571  | 0.15370358 | 0.42148552 |
| Cysltr2     | 5.47982433 | -0.3089101 | 0.25570695 | -1.2080628 | NA         | NA         |
| Secisbp2l   | 2286.89088 | -0.3089163 | 0.23994225 | -1.287461  | 0.19793365 | 0.48094783 |
| Adam23      | 804.21702  | -0.3090003 | 0.32954957 | -0.9376444 | NA         | NA         |
| Gypa        | 4.93466503 | -0.3090287 | 0.37296411 | -0.8285749 | 0.40734502 | NA         |
| Cds1        | 519.726267 | -0.3090923 | 0.25599138 | -1.2074326 | 0.22726559 | 0.51745348 |
| Kazn        | 3961.69792 | -0.3090937 | 0.16964946 | -1.8219549 | 0.06846182 | 0.26602944 |
| Drg2        | 5360.68383 | -0.3092557 | 0.24621113 | -1.2560588 | 0.20909465 | 0.49516588 |
| Gm12530     | 28.6391075 | -0.3093563 | 0.42590291 | -0.726354  | 0.46762179 | 0.735927   |
| Aaed1       | 977.607888 | -0.3094208 | 0.25973874 | -1.1912771 | 0.23354484 | 0.52506228 |
| Gpalpp1     | 4238.67675 | -0.3095381 | 0.18210575 | -1.699771  | 0.08917401 | 0.31092939 |
| Pnlsr       | 10052.2153 | -0.3096454 | 0.15026529 | -2.0606584 | 0.03933565 | 0.18954651 |
| Xrcc3       | 781.454797 | -0.309649  | 0.21520536 | -1.4388535 | 0.15019203 | 0.41633446 |
| Pttg1       | 3149.29076 | -0.3098048 | 0.43175712 | -0.7175442 | 0.47303837 | 0.73939288 |
| Dennd4b     | 1382.9066  | -0.3098239 | 0.1837091  | -1.6864917 | 0.09170113 | 0.3153569  |
| Ppl         | 217.494331 | -0.3098498 | 0.29950232 | -1.0345488 | 0.30087968 | 0.59559316 |
| Tdrd7       | 182.573431 | -0.3098856 | 0.38665907 | -0.801444  | 0.42287464 | 0.70197732 |
| Aldoc       | 2502.5966  | -0.310031  | 0.24434321 | -1.268834  | 0.20450028 | 0.48978652 |
| 6330549D23l | 45.2047663 | -0.3104262 | 0.37895233 | -0.8191694 | 0.41268976 | 0.69515344 |
| Ttf1        | 3033.59547 | -0.3104574 | 0.20707875 | -1.499224  | 0.13381552 | 0.39101    |
| Fbxo43      | 9.51111625 | -0.3105014 | 0.42612226 | -0.7286675 | 0.4662051  | 0.73498824 |
| Ptch2       | 806.511687 | -0.3105857 | 0.27123984 | -1.1450594 | 0.25218455 | 0.54597271 |
| Cltb        | 3471.12    | -0.3107014 | 0.22815541 | -1.3617973 | 0.17326186 | 0.45071973 |
| Sema7a      | 360.002802 | -0.3108415 | 0.26184581 | -1.1871166 | 0.23518162 | 0.52698982 |
| Sdc4        | 8544.27119 | -0.3110334 | 0.31144076 | -0.998692  | 0.31794391 | 0.61184825 |
| Actr2       | 29714.7299 | -0.311106  | 0.1657881  | -1.8765279 | 0.06058283 | 0.24771956 |
| Zbtb49      | 345.498072 | -0.31119   | 0.21880214 | -1.4222439 | 0.15495545 | 0.42364842 |
| Snrnp27     | 4653.74631 | -0.3113619 | 0.20764702 | -1.499477  | 0.13374993 | 0.39097108 |
| Arpp21      | 4.70981223 | -0.311383  | 0.34112768 | -0.9128048 | 0.36134521 | NA         |
| C2cd4c      | 34.2786875 | -0.3114603 | 0.40164102 | -0.7754692 | 0.43806243 | 0.7119144  |
| Zbtb16      | 34.8242642 | -0.3115067 | 0.42628585 | -0.7307461 | 0.46493422 | 0.73410475 |
| Tbc1d15     | 7642.17686 | -0.3115565 | 0.16253479 | -1.9168602 | 0.0552557  | 0.23353996 |
| Aif1l       | 481.456819 | -0.3115659 | 0.33180579 | -0.9390007 | 0.34773037 | 0.63986259 |
| Smpd1       | 609.27072  | -0.3116631 | 0.23198436 | -1.3434659 | 0.17912117 | 0.45716614 |
| Zfp119b     | 623.296189 | -0.311673  | 0.19789244 | -1.5749618 | 0.11526525 | 0.3601547  |
| Zfp874a     | 1643.38477 | -0.3117414 | 0.30837372 | -1.0109206 | 0.31205442 | 0.60659478 |
| Cdk19       | 2503.14807 | -0.3117431 | 0.18406379 | -1.693669  | 0.0903282  | 0.31312835 |

|             |            |            |            |            |            |            |
|-------------|------------|------------|------------|------------|------------|------------|
| Klf1        | 44.4546552 | -0.3117849 | 0.3828528  | -0.8143728 | 0.41543144 | 0.69773996 |
| B020014A21I | 3.27493772 | -0.3118404 | 0.28470019 | -1.0953292 | 0.27337245 | NA         |
| Brd8        | 10899.0189 | -0.3118491 | 0.18092014 | -1.7236839 | 0.08476493 | 0.3019884  |
| Ghdc        | 807.030575 | -0.3119458 | 0.24483463 | -1.2741082 | 0.20262506 | 0.48732173 |
| Zfp316      | 177.247622 | -0.3119724 | 0.30360829 | -1.027549  | 0.30416205 | 0.59904052 |
| Atcay       | 27.3125819 | -0.3121867 | 0.41111135 | -0.7593686 | 0.4476321  | 0.72071395 |
| Slc38a10    | 8807.57109 | -0.3123136 | 0.2021171  | -1.545211  | 0.12229524 | 0.37275837 |
| 9130409I23R | 5.01826452 | -0.312315  | 0.40507011 | -0.7710146 | 0.44069826 | NA         |
| Slc25a15    | 4053.29221 | -0.3123318 | 0.23391879 | -1.3352146 | 0.18180613 | 0.46099022 |
| 1700007L15F | 155.152747 | -0.3123842 | 0.30910632 | -1.0106045 | 0.31220578 | 0.60664161 |
| Xiap        | 7016.79202 | -0.3126552 | 0.21859519 | -1.4302929 | 0.15263297 | 0.42030588 |
| Pmel        | 2179.73406 | -0.312666  | 0.29602326 | -1.0562211 | 0.2908672  | 0.58476633 |
| D15Ertd621e | 10872.0372 | -0.3126989 | 0.17913422 | -1.7456126 | 0.0808783  | 0.29393279 |
| Pigv        | 690.938083 | -0.3127364 | 0.19044041 | -1.6421744 | 0.10055386 | 0.33235136 |
| Fads1       | 9828.75798 | -0.3127467 | 0.18772255 | -1.6660052 | 0.09571237 | 0.32323331 |
| 2610528A11f | 10.0496407 | -0.3127702 | 0.43186061 | -0.7242388 | 0.46891916 | 0.73673084 |
| Pgm1        | 6946.37551 | -0.3128101 | 0.1716302  | -1.8225822 | 0.0683667  | 0.26579263 |
| Prtn3       | 6.55375186 | -0.3128588 | 0.37891258 | -0.8256755 | 0.4089882  | 0.69259925 |
| Eya4        | 4.65591243 | -0.3128913 | 0.40451353 | -0.7735003 | 0.43922636 | NA         |
| Tab1        | 884.499718 | -0.3128967 | 0.18868985 | -1.6582594 | 0.09726513 | 0.32598491 |
| 4930519F16F | 163.813361 | -0.3129184 | 0.33853866 | -0.924321  | 0.3553192  | 0.64696432 |
| Ltv1        | 8178.18726 | -0.3129307 | 0.15758787 | -1.9857536 | 0.04706069 | 0.21114854 |
| Ankrd10     | 8697.34439 | -0.3133116 | 0.24882308 | -1.2591741 | 0.20796744 | 0.49345463 |
| Arhgef38    | 2.58166736 | -0.3133519 | 0.32013524 | -0.9788112 | 0.3276733  | NA         |
| Rps26       | 44108.3745 | -0.3134988 | 0.23704044 | -1.322554  | 0.18598374 | 0.46656448 |
| Rufy1       | 1140.39795 | -0.3135967 | 0.20708728 | -1.5143212 | 0.12994439 | 0.38549508 |
| Mtg1        | 1780.51951 | -0.3136399 | 0.21633496 | -1.4497883 | 0.14711756 | 0.41165516 |
| Hrh3        | 7.48730563 | -0.3136462 | 0.41326858 | -0.7589403 | 0.44788829 | 0.72087942 |
| Rnf168      | 5097.62603 | -0.3137153 | 0.19738296 | -1.5893735 | 0.11197608 | 0.35385899 |
| Nprl2       | 1110.27112 | -0.3137406 | 0.22035739 | -1.4237808 | 0.15450994 | 0.42295308 |
| Rtn4ip1     | 1678.93973 | -0.3138349 | 0.15761083 | -1.9912012 | 0.04645877 | 0.20973362 |
| 2900056M20  | 791.462195 | -0.3139308 | 0.24469724 | -1.2829357 | 0.1995146  | 0.48250548 |
| Dnajc28     | 217.548583 | -0.3139579 | 0.25545819 | -1.2289992 | 0.21907209 | 0.50756705 |
| Nlrp9b      | 163.472504 | -0.3140489 | 0.40722649 | -0.7711898 | 0.44059445 | 0.71461037 |
| Arid4b      | 3557.14131 | -0.3140741 | 0.20587153 | -1.5255832 | 0.12711371 | 0.38087577 |
| Emp3        | 96.6048048 | -0.3141146 | 0.39796602 | -0.7893    | 0.4299367  | 0.70586418 |
| Ostc        | 7685.35119 | -0.3142173 | 0.18360928 | -1.7113368 | 0.08701896 | 0.30681806 |
| Hist1h1t    | 1.99338909 | -0.3142683 | 0.30784445 | -1.0208673 | 0.30731729 | NA         |
| Cct3        | 55091.6902 | -0.3143212 | 0.17359994 | -1.8106068 | 0.07020173 | 0.26975714 |
| Asna1       | 16360.7427 | -0.3143681 | 0.18666576 | -1.684123  | 0.09215789 | 0.3161216  |
| A230001M1C  | 1.96415209 | -0.3144355 | 0.30752527 | -1.0224705 | 0.30655824 | NA         |

|             |            |            |            |            |            |            |
|-------------|------------|------------|------------|------------|------------|------------|
| Frem1       | 1.9298984  | -0.3145709 | 0.30973292 | -1.0156198 | 0.30981049 | NA         |
| Tnrc6a      | 6804.45479 | -0.314602  | 0.19077108 | -1.6491072 | 0.09912567 | 0.32938105 |
| Kcnn3       | 20.3180855 | -0.3146781 | 0.4265244  | -0.7377728 | 0.46065251 | 0.73112954 |
| Crocc       | 3322.46512 | -0.3147101 | 0.21721491 | -1.4488419 | 0.14738173 | 0.41204462 |
| Ralb        | 8523.95707 | -0.3150423 | 0.19902441 | -1.5829328 | 0.11343679 | 0.35702398 |
| Ncaph2      | 12490.3827 | -0.3150562 | 0.18281862 | -1.7233268 | 0.08482945 | 0.30207154 |
| 2810428115R | 2093.84413 | -0.3152237 | 0.29013626 | -1.0864679 | 0.27727202 | 0.56955371 |
| Dph1        | 1430.11789 | -0.3153642 | 0.18808448 | -1.6767159 | 0.09359806 | 0.3186567  |
| Gprc5d      | 1.66635937 | -0.3154009 | 0.28351074 | -1.1124829 | 0.26593057 | NA         |
| Cdt1        | 9240.63443 | -0.3154214 | 0.23510028 | -1.3416461 | 0.17971077 | 0.45799446 |
| Chrna7      | 91.9952744 | -0.3154306 | 0.37454277 | -0.8421751 | 0.39968993 | 0.68491125 |
| Nol4        | 13.7720846 | -0.3155724 | 0.43075493 | -0.7326031 | 0.46380053 | 0.73350575 |
| Lrriq4      | 512.945286 | -0.3156206 | 0.34724995 | -0.9089147 | 0.36339515 | 0.65367309 |
| Brip1       | 1975.87512 | -0.3156224 | 0.20140835 | -1.567077  | 0.11709668 | 0.36346717 |
| Klk14       | 5.27824545 | -0.3157445 | 0.41154925 | -0.7672095 | 0.44295699 | NA         |
| Ccdc51      | 699.391304 | -0.3157848 | 0.21105103 | -1.4962485 | 0.13458891 | 0.3921626  |
| Dlg5        | 7709.86305 | -0.3158669 | 0.22098289 | -1.4293726 | 0.15289718 | 0.42060925 |
| Cenpv       | 3735.04339 | -0.3159124 | 0.23965387 | -1.3182028 | 0.18743578 | 0.46869494 |
| Prrx2       | 86.6298336 | -0.315919  | 0.42247813 | -0.7477761 | 0.45459523 | 0.72518943 |
| Rilpl2      | 635.046041 | -0.3159795 | 0.25338117 | -1.2470519 | 0.21237849 | 0.49904772 |
| Acn9        | 472.426659 | -0.3161167 | 0.22234244 | -1.4217558 | 0.15509716 | 0.4237087  |
| Pitrm1      | 11597.2442 | -0.3162385 | 0.15855731 | -1.9944744 | 0.04610024 | 0.20870592 |
| Mllt10      | 9312.86884 | -0.3162964 | 0.19460197 | -1.6253504 | 0.10408792 | 0.33939891 |
| Frmd5       | 331.498157 | -0.3163812 | 0.37428758 | -0.845289  | 0.39794952 | 0.68393999 |
| Exosc8      | 7701.32748 | -0.3164276 | 0.21508027 | -1.4712072 | 0.14123508 | 0.40171844 |
| Fktn        | 1249.0551  | -0.3164589 | 0.2770135  | -1.1423953 | 0.25328975 | 0.54616042 |
| Snora23     | 20.3296859 | -0.3164605 | 0.43206522 | -0.7324368 | 0.46390198 | 0.73359159 |
| Atxn7l2     | 481.407782 | -0.3165427 | 0.2897429  | -1.092495  | 0.27461559 | 0.56715903 |
| Oit1        | 10.4876397 | -0.3166005 | 0.42743771 | -0.7406938 | 0.45887909 | 0.72943154 |
| Rapgef1     | 6823.45384 | -0.316922  | 0.21821387 | -1.452346  | 0.14640542 | 0.41044722 |
| Nexn        | 64.0014581 | -0.3169745 | 0.39083258 | -0.8110237 | 0.41735204 | 0.69868745 |
| Snrpd3      | 9577.75101 | -0.316989  | 0.17483007 | -1.8131261 | 0.06981237 | 0.26899213 |
| Rbm44       | 2400.03261 | -0.3170724 | 0.43227156 | -0.7335029 | 0.46325175 | 0.73297798 |
| Zbtb37      | 330.1946   | -0.3171554 | 0.31854879 | -0.9956257 | 0.31943206 | 0.61307183 |
| Hbs1l       | 4934.33117 | -0.3171975 | 0.14828517 | -2.1391045 | 0.03242721 | 0.16786802 |
| LOC10050289 | 4.91825739 | -0.3172518 | 0.31171046 | -1.0177771 | 0.30878391 | NA         |
| Ftsj3       | 22112.5936 | -0.3172962 | 0.19380198 | -1.6372184 | 0.10158484 | 0.33476283 |
| Prps1       | 15042.3774 | -0.3172986 | 0.20035344 | -1.5836942 | 0.11326332 | 0.35655018 |
| Myo7b       | 4.97634096 | -0.3173633 | 0.35050585 | -0.9054436 | 0.36523041 | NA         |
| BC024139    | 3.25405286 | -0.3174088 | 0.3435328  | -0.9239549 | 0.35550978 | NA         |
| Lamtor5     | 2641.55219 | -0.3175138 | 0.17659894 | -1.7979373 | 0.07218695 | 0.27400029 |

|             |            |            |            |            |            |            |
|-------------|------------|------------|------------|------------|------------|------------|
| Tmem194b    | 1168.0641  | -0.3175354 | 0.24043912 | -1.320648  | 0.18661877 | 0.46774613 |
| Gm15446     | 80.386781  | -0.3176182 | 0.34255597 | -0.9272009 | 0.35382224 | 0.64527848 |
| Tenm3       | 3845.2231  | -0.3176517 | 0.29631349 | -1.0720124 | 0.28371445 | 0.57613521 |
| 4933430I17R | 84.1488333 | -0.317671  | 0.36838187 | -0.8623417 | 0.38849952 | 0.67760684 |
| Skp1a       | 31167.5162 | -0.3178867 | 0.18441826 | -1.7237265 | 0.08475722 | 0.3019884  |
| Wfikkn2     | 36.8169403 | -0.3179861 | 0.39796728 | -0.7990257 | 0.4242755  | 0.70280233 |
| Mrps5       | 6769.07977 | -0.3180687 | 0.16915503 | -1.8803384 | 0.06006197 | 0.24644423 |
| Mrpl30      | 4032.57934 | -0.3181366 | 0.21200911 | -1.50058   | 0.13346424 | 0.39042557 |
| Rnmt        | 9632.9826  | -0.3185992 | 0.17694054 | -1.8006001 | 0.07176593 | 0.2729352  |
| Cspg4       | 12.5050301 | -0.3186551 | 0.43189912 | -0.7377998 | 0.46063612 | 0.73112954 |
| Rps25       | 44631.0013 | -0.31868   | 0.19654926 | -1.6213745 | 0.10493735 | 0.34096964 |
| Snord87     | 105.281597 | -0.3187031 | 0.34289396 | -0.929451  | 0.35265542 | 0.64439796 |
| Pifo        | 17.5961305 | -0.3187509 | 0.4292773  | -0.7425292 | 0.45776676 | 0.72851923 |
| Nhlrc3      | 508.058053 | -0.3187991 | 0.19636924 | -1.6234675 | 0.1044895  | 0.3398475  |
| A830010M2C  | 435.564468 | -0.3189086 | 0.23473143 | -1.3586107 | 0.17426999 | 0.45152826 |
| Gatad2b     | 1365.18389 | -0.3189588 | 0.32085495 | -0.9940902 | 0.32017896 | 0.61412854 |
| Hist1h3f    | 4.66435375 | -0.3190267 | 0.36358692 | -0.8774428 | 0.3802462  | NA         |
| Rab6b       | 416.454474 | -0.3192827 | 0.23927263 | -1.3343888 | 0.18207646 | 0.46137707 |
| Fam110a     | 497.570392 | -0.3193808 | 0.27906138 | -1.1444822 | 0.2524237  | 0.54598821 |
| Hnf4a       | 97.5571743 | -0.3194693 | 0.42785579 | -0.7466751 | 0.45525969 | 0.72574357 |
| Rasgef1b    | 52.4195805 | -0.3194946 | 0.41039417 | -0.7785067 | 0.43627034 | 0.71011515 |
| 1700020I14R | 2675.24249 | -0.31952   | 0.1733903  | -1.8427788 | 0.06536132 | 0.25903004 |
| Nmral1      | 2060.66824 | -0.3195576 | 0.21323164 | -1.4986404 | 0.13396695 | 0.3912338  |
| Avpr1b      | 10.5083766 | -0.3195595 | 0.42625389 | -0.7496928 | 0.45343973 | 0.72448795 |
| Hpn         | 96.9811853 | -0.3197314 | 0.41563193 | -0.7692657 | 0.44173561 | 0.71556426 |
| Baz2a       | 31916.0527 | -0.3199168 | 0.25372062 | -1.2609018 | 0.20734423 | 0.4927277  |
| Ppig        | 12966.2555 | -0.3199762 | 0.18708512 | -1.7103244 | 0.0872059  | 0.30723583 |
| B4galnt4    | 4307.42166 | -0.3200522 | 0.27412491 | -1.1675415 | 0.24299176 | 0.53546335 |
| Tbc1d22b    | 1910.30675 | -0.3201117 | 0.16765827 | -1.9093103 | 0.05622208 | 0.23617221 |
| Hnrnpr      | 6598.96437 | -0.3201561 | 0.18531877 | -1.7275968 | 0.08406054 | 0.30042186 |
| Slc35e4     | 198.863083 | -0.3201823 | 0.29671783 | -1.07908   | 0.28055205 | 0.57255444 |
| E130006D01f | 32.8195162 | -0.3202312 | 0.39934216 | -0.8018969 | 0.4226126  | 0.70176706 |
| Zfp605      | 846.861855 | -0.3202699 | 0.1694144  | -1.8904524 | 0.05869748 | 0.24244475 |
| Gm5607      | 3.3199031  | -0.3202848 | 0.32399845 | -0.9885382 | 0.32288914 | NA         |
| Fam175b     | 2871.0929  | -0.3203636 | 0.15559081 | -2.0590138 | 0.03949292 | 0.1899055  |
| Bcl2l13     | 4294.58863 | -0.3203957 | 0.19240639 | -1.6652032 | 0.09587222 | 0.32354794 |
| Zbbx        | 28.4495483 | -0.320482  | 0.26087088 | -1.2285082 | 0.21925624 | 0.50770735 |
| Cyct        | 2107.53838 | -0.3207314 | 0.43112025 | -0.7439489 | 0.45690737 | 0.72746933 |
| Nlrp6       | 11.9030801 | -0.3207968 | 0.43219893 | -0.7422433 | 0.45793992 | 0.72868348 |
| Guca1b      | 5.83178816 | -0.3211352 | 0.36158688 | -0.8881274 | 0.37447224 | NA         |
| Ccdc167     | 560.543987 | -0.3211531 | 0.25761056 | -1.2466612 | 0.21252175 | 0.49916693 |

|             |            |            |            |            |            |            |
|-------------|------------|------------|------------|------------|------------|------------|
| Zbtb22      | 1525.96913 | -0.3211743 | 0.20987886 | -1.5302844 | 0.12594636 | 0.37885621 |
| Megf9       | 124.084346 | -0.3212691 | 0.35273845 | -0.9107855 | 0.36240838 | 0.65327607 |
| Ssbp4       | 3970.35522 | -0.3213273 | 0.20025914 | -1.6045574 | 0.10859125 | 0.34811431 |
| Zfp846      | 1095.525   | -0.321444  | 0.27450194 | -1.1710081 | 0.24159553 | 0.53420333 |
| Cdhr3       | 2.20842474 | -0.3215301 | 0.33428985 | -0.9618304 | 0.33613482 | NA         |
| Tceal1      | 105.747522 | -0.3215676 | 0.29357862 | -1.0953373 | 0.2733689  | 0.56629559 |
| 4833419F23F | 7.91308237 | -0.3216821 | 0.40668733 | -0.7909814 | 0.42895483 | 0.7048133  |
| Rbbp6       | 8436.19682 | -0.3217136 | 0.17858898 | -1.8014191 | 0.07163685 | 0.2726443  |
| Nup188      | 17626.2457 | -0.3217237 | 0.20203715 | -1.5923989 | 0.11129511 | 0.35271344 |
| E2f5        | 3904.19507 | -0.3217734 | 0.22543605 | -1.4273377 | 0.15348257 | 0.42139963 |
| Rpp40       | 2422.62451 | -0.3219573 | 0.19429446 | -1.6570585 | 0.09750765 | 0.32644461 |
| Hspa1b      | 188.624953 | -0.3219608 | 0.25792708 | -1.2482629 | 0.2119348  | 0.49860788 |
| Adam17      | 4398.9394  | -0.3219748 | 0.15229356 | -2.1141722 | 0.03450056 | 0.17459102 |
| E330021D16f | 5.94024609 | -0.3221023 | 0.37949415 | -0.8487674 | 0.39601072 | 0.68282101 |
| Tmem116     | 179.543469 | -0.3221308 | 0.42263139 | -0.7622027 | 0.44593901 | 0.71907897 |
| Gm9833      | 477.25555  | -0.3222992 | 0.2118793  | -1.5211452 | 0.1282234  | 0.38228568 |
| Eif4g3      | 1798.27108 | -0.3223704 | 0.26773109 | -1.2040829 | 0.22855753 | 0.51925467 |
| Rnf215      | 596.305388 | -0.3226526 | 0.21426468 | -1.5058602 | 0.13210307 | 0.38856271 |
| Caprin1     | 56609.6993 | -0.3228507 | 0.18352975 | -1.7591194 | 0.07855722 | 0.2888991  |
| Zfp639      | 3048.97571 | -0.3230713 | 0.19328051 | -1.6715153 | 0.09461995 | 0.32092362 |
| Paics       | 60886.8636 | -0.3230928 | 0.15648844 | -2.0646431 | 0.03895679 | 0.18833006 |
| 2410012E07F | 59.3088067 | -0.3232178 | 0.41895651 | -0.7714829 | 0.44042076 | 0.71440317 |
| Zfp60       | 3213.46304 | -0.3234251 | 0.17594879 | -1.8381773 | 0.06603629 | 0.26037786 |
| Psmg1       | 4895.80541 | -0.3234999 | 0.19445844 | -1.6635942 | 0.09619354 | 0.32400358 |
| Wdr65       | 12.515788  | -0.3235524 | 0.43063739 | -0.7513338 | 0.45245179 | 0.72418447 |
| Phf3        | 12511.5603 | -0.3235545 | 0.2318242  | -1.3956892 | 0.1628081  | 0.43457411 |
| Smok2b      | 4.01266606 | -0.32361   | 0.31330607 | -1.0328878 | 0.30165642 | NA         |
| Ddx49       | 4144.82762 | -0.3236534 | 0.24361999 | -1.3285175 | 0.1840072  | 0.46444825 |
| Cnksr1      | 44.8199748 | -0.3236955 | 0.38368574 | -0.8436476 | 0.39886636 | 0.68470812 |
| Ralgps2     | 3112.05588 | -0.3237009 | 0.15926621 | -2.0324519 | 0.04210792 | 0.19725327 |
| Sntg2       | 2.34543342 | -0.3237657 | 0.33030014 | -0.9802167 | 0.32697915 | NA         |
| Plec        | 4390.24075 | -0.3238492 | 0.31038383 | -1.0433828 | 0.29677103 | 0.59122008 |
| Cyp2c29     | 12.1327244 | -0.3239581 | 0.39735851 | -0.8152792 | 0.41491249 | 0.69724488 |
| Slc17a7     | 69.1941275 | -0.3240029 | 0.32480415 | -0.9975332 | 0.31850575 | 0.61238106 |
| C230037L18F | 25.4113711 | -0.3240382 | 0.42690611 | -0.7590386 | 0.44782945 | 0.72087942 |
| Rnf2        | 13139.9231 | -0.3240753 | 0.16795694 | -1.9295143 | 0.05366704 | 0.22973636 |
| Cd300lb     | 5.78833517 | -0.3241422 | 0.28499028 | -1.1373797 | NA         | NA         |
| Scpep1      | 18548.2142 | -0.3241593 | 0.17037245 | -1.9026512 | 0.05708607 | 0.23825696 |
| Mdn1        | 18807.4403 | -0.3243736 | 0.28214691 | -1.149662  | 0.2502831  | 0.54397659 |
| Ttc37       | 5136.05259 | -0.3244087 | 0.2371737  | -1.3678105 | 0.1713714  | 0.44770759 |
| Gpr157      | 137.794555 | -0.3244238 | 0.33228825 | -0.9763325 | 0.32889973 | 0.62222868 |



|             |            |            |            |            |            |            |
|-------------|------------|------------|------------|------------|------------|------------|
| Gm15104     | 1.76575336 | -0.3245436 | 0.28542571 | -1.1370512 | 0.25551688 | NA         |
| Galnt15     | 3.85453769 | -0.3246071 | 0.33519299 | -0.9684184 | 0.33283544 | NA         |
| Actrt3      | 7.84816225 | -0.3246733 | 0.39453293 | -0.8229308 | 0.41054732 | 0.69313511 |
| Rbmx2       | 1905.09402 | -0.3247056 | 0.18119739 | -1.7919994 | 0.07313305 | 0.27584092 |
| Rasl2-9     | 11.3665496 | -0.3247816 | 0.43222177 | -0.7514236 | 0.45239775 | 0.72418447 |
| Cacybp      | 31737.3635 | -0.3248109 | 0.20343639 | -1.5966215 | 0.11035009 | 0.35105463 |
| Tango6      | 1730.69241 | -0.3248153 | 0.2525207  | -1.2862918 | 0.19834125 | 0.48126148 |
| Rhot1       | 6612.96221 | -0.3248497 | 0.16123741 | -2.0147289 | 0.04393306 | 0.20237057 |
| Msh2        | 34212.6241 | -0.3249846 | 0.18628118 | -1.7445915 | 0.081056   | 0.29437221 |
| Nol9        | 8375.87817 | -0.3250065 | 0.23835379 | -1.3635468 | 0.17271025 | 0.44977111 |
| Nlrp14      | 173.488143 | -0.3251438 | 0.32790828 | -0.9915694 | 0.32140765 | 0.61561896 |
| Lnp         | 2795.52357 | -0.3252348 | 0.20428835 | -1.592038  | 0.11137617 | 0.35289544 |
| 1600014C23F | 8.80467204 | -0.3254046 | 0.40844791 | -0.7966856 | 0.42563363 | 0.70385246 |
| Phc3        | 1539.55428 | -0.3254097 | 0.22525326 | -1.4446393 | 0.14855921 | 0.41357758 |
| Rrp9        | 6617.66878 | -0.3254965 | 0.1950834  | -1.6684993 | 0.09521665 | 0.32231479 |
| Acan        | 303.033537 | -0.3254982 | 0.29845256 | -1.0906194 | 0.27544039 | 0.56766083 |
| Nup107      | 15050.9676 | -0.3255334 | 0.14203055 | -2.2919959 | 0.02190588 | 0.13107286 |
| Pfas        | 12556.7131 | -0.3255403 | 0.22783959 | -1.4288136 | 0.15305783 | 0.42075345 |
| Nsmf        | 171.788202 | -0.3256163 | 0.36099982 | -0.9019846 | 0.36706507 | 0.65717579 |
| Zfp661      | 810.210278 | -0.3256487 | 0.19231463 | -1.6933124 | 0.09039602 | 0.31328893 |
| Zfp512      | 3651.04135 | -0.325657  | 0.17005987 | -1.914955  | 0.05549824 | 0.23446159 |
| Cdo1        | 3849.52329 | -0.3257159 | 0.24550298 | -1.326729  | 0.18459835 | 0.46455672 |
| Aasdhpt     | 5775.92091 | -0.3261059 | 0.17925304 | -1.819249  | 0.06887346 | 0.26700698 |
| Ldha        | 74038.2999 | -0.3261141 | 0.26105058 | -1.2492371 | 0.21157838 | 0.49812885 |
| 12-Sep      | 14.2703811 | -0.3262492 | 0.43022513 | -0.758322  | 0.44825822 | 0.72108696 |
| Mtdh        | 11522.6862 | -0.3263908 | 0.18179133 | -1.7954145 | 0.07258768 | 0.27469319 |
| Spag9       | 5793.59936 | -0.3263985 | 0.2607444  | -1.2517949 | 0.21064459 | 0.49752947 |
| Leprotl1    | 1514.11969 | -0.3265032 | 0.25721921 | -1.2693579 | 0.20431344 | 0.48941441 |
| Fbxl4       | 1456.32248 | -0.3265615 | 0.24423641 | -1.3370713 | 0.18119938 | 0.45992672 |
| Casc3       | 5606.84762 | -0.3265684 | 0.2043148  | -1.5983588 | 0.10996315 | 0.35043706 |
| Ppp3cb      | 5436.06172 | -0.3267642 | 0.1924822  | -1.6976333 | 0.089577   | 0.31135715 |
| Mir6403     | 1.96311043 | -0.3268641 | 0.31247865 | -1.0460364 | 0.29554421 | NA         |
| Lrrc20      | 496.068169 | -0.3270451 | 0.22255874 | -1.4694775 | 0.14170332 | 0.40234221 |
| Rars        | 16709.5842 | -0.3270624 | 0.18154853 | -1.8015149 | 0.07162176 | 0.2726443  |
| Gprc5a      | 2142.05676 | -0.3271543 | 0.3219324  | -1.0162205 | 0.30952438 | 0.60444616 |
| Zfp40       | 721.245339 | -0.3272808 | 0.2282552  | -1.433837  | 0.15161878 | 0.41871751 |
| Prrc2c      | 25668.231  | -0.3273882 | 0.27643916 | -1.1843047 | 0.23629246 | 0.52810283 |
| Kcnd3       | 47.5862428 | -0.3274079 | 0.41246442 | -0.7937846 | 0.42732082 | 0.70423083 |
| Gstm2       | 2323.29869 | -0.3275191 | 0.28628452 | -1.1440337 | 0.25260965 | 0.54598821 |
| 2010300C02F | 60.2765233 | -0.327547  | 0.35701223 | -0.9174671 | 0.35889792 | 0.64988607 |
| Trp53cor1   | 197.162436 | -0.3276204 | 0.2606109  | -1.2571247 | 0.20870849 | 0.4946846  |

|             |            |            |            |            |            |            |
|-------------|------------|------------|------------|------------|------------|------------|
| Serac1      | 1997.57993 | -0.3276933 | 0.18905076 | -1.7333616 | 0.08303142 | 0.29854836 |
| Zfp869      | 1608.1925  | -0.3279362 | 0.35131015 | -0.9334665 | 0.35057917 | 0.64252877 |
| Zfp598      | 6616.77106 | -0.327976  | 0.20422082 | -1.6059872 | 0.10827672 | 0.34760762 |
| Rimbp2      | 35.5287743 | -0.3279776 | 0.42840975 | -0.7655699 | 0.44393228 | 0.71725619 |
| Chsy1       | 2086.1996  | -0.3279811 | 0.2233066  | -1.4687481 | 0.14190112 | 0.40253636 |
| Tbp         | 3179.71883 | -0.3281023 | 0.15037479 | -2.181897  | 0.02911713 | 0.15640778 |
| Ebi3        | 46.9953223 | -0.328149  | 0.43041001 | -0.7624103 | 0.44581515 | 0.71902836 |
| Dcaf11      | 2298.19733 | -0.328318  | 0.17625908 | -1.8627014 | 0.06250429 | 0.25214118 |
| 2510049J12R | 2.87758998 | -0.3283725 | 0.36973532 | -0.8881286 | 0.37447157 | NA         |
| Zfp397      | 2568.62094 | -0.3285537 | 0.2340118  | -1.4040049 | 0.1603174  | 0.43166    |
| Otud4       | 15257.4232 | -0.3285602 | 0.26474259 | -1.2410553 | 0.21458533 | 0.50166747 |
| Snhg5       | 9045.11901 | -0.3286481 | 0.20651643 | -1.5913898 | 0.11152188 | 0.35321319 |
| Nudt7       | 102.697434 | -0.3286699 | 0.27545826 | -1.1931751 | 0.2328008  | 0.52452319 |
| Sorcs3      | 5.69082327 | -0.3286889 | 0.34130285 | -0.9630419 | NA         | NA         |
| Sephs1      | 5711.48509 | -0.3287036 | 0.16856258 | -1.9500389 | 0.05117148 | 0.22271695 |
| Hnrnpk      | 62496.4567 | -0.3287225 | 0.16395087 | -2.0050064 | 0.04496237 | 0.20548551 |
| Tbc1d25     | 1422.46021 | -0.3289013 | 0.20168254 | -1.6307872 | 0.10293523 | 0.33719106 |
| Cblb        | 1535.29553 | -0.3289613 | 0.18305351 | -1.7970773 | 0.07232335 | 0.27429691 |
| Rpl31       | 29020.8663 | -0.3290712 | 0.21963825 | -1.4982418 | 0.13407045 | 0.39131561 |
| Prpf8       | 46366.0292 | -0.3291817 | 0.27516486 | -1.1963073 | 0.23157667 | 0.52302118 |
| Rsrc1       | 3932.43548 | -0.3292832 | 0.1964982  | -1.675757  | 0.09378579 | 0.3190125  |
| Ncapg2      | 5797.86923 | -0.3294142 | 0.19681736 | -1.6737049 | 0.09418862 | 0.31987928 |
| Eef1g       | 47260.9568 | -0.3295087 | 0.19166072 | -1.7192294 | 0.08557261 | 0.30351181 |
| Pds5b       | 6566.50475 | -0.3295564 | 0.21378741 | -1.5415147 | 0.12319157 | 0.37460933 |
| Tfb1m       | 1590.83664 | -0.3295603 | 0.17878613 | -1.8433213 | 0.06528212 | 0.25884808 |
| Lpcat1      | 2421.10396 | -0.3295654 | 0.2142333  | -1.5383479 | 0.12396357 | 0.37578118 |
| Ankra2      | 1605.99116 | -0.3297228 | 0.22368488 | -1.4740505 | 0.14046799 | 0.40066355 |
| Akap1       | 17308.4871 | -0.3297984 | 0.25050907 | -1.3165126 | 0.18800204 | 0.46937977 |
| Trappc8     | 6724.9575  | -0.3298131 | 0.19319639 | -1.7071391 | 0.08779621 | 0.30847691 |
| Ppp4r1l-ps  | 228.360838 | -0.3298567 | 0.26436053 | -1.2477532 | 0.21212147 | 0.49882065 |
| Zfp658      | 313.712101 | -0.3299566 | 0.34679204 | -0.9514537 | 0.34137409 | 0.63470928 |
| 2610020C07F | 59.2909021 | -0.3300042 | 0.34953659 | -0.9441193 | 0.34510871 | 0.63773152 |
| Cep57       | 7391.18715 | -0.330155  | 0.16637034 | -1.984458  | 0.0472048  | 0.21149979 |
| Prune2      | 2391.60972 | -0.3301737 | 0.25421348 | -1.2988047 | 0.19401095 | 0.47678006 |
| Snord1c     | 31.1315953 | -0.3302762 | 0.40850294 | -0.8085037 | 0.41880065 | 0.69954553 |
| Ccdc117     | 6355.92944 | -0.3302896 | 0.19650147 | -1.6808505 | 0.09279195 | 0.31711237 |
| Bap1        | 5203.25464 | -0.3304245 | 0.20342383 | -1.6243159 | 0.10430841 | 0.33956461 |
| Gm13544     | 1.72031864 | -0.3305063 | 0.29014272 | -1.1391163 | 0.25465464 | NA         |
| Abca8b      | 15.7199181 | -0.3305554 | 0.41523319 | -0.7960718 | 0.42599031 | 0.70402942 |
| Btbd7       | 1786.67258 | -0.3305843 | 0.28875633 | -1.1448557 | 0.25226895 | 0.54598821 |
| 1500009C09F | 172.289642 | -0.3306348 | 0.41174106 | -0.8030164 | 0.42196526 | 0.70127884 |

|             |            |            |            |            |            |            |
|-------------|------------|------------|------------|------------|------------|------------|
| Alg14       | 599.562124 | -0.3307733 | 0.18132053 | -1.8242465 | 0.06811482 | 0.26501216 |
| E2f2        | 1053.68022 | -0.3308012 | 0.25781077 | -1.2831165 | 0.19945127 | 0.48250548 |
| Grtp1       | 3334.82021 | -0.3309565 | 0.21317469 | -1.5525129 | 0.12053954 | 0.36940975 |
| Asb1        | 1026.91881 | -0.3310952 | 0.20605387 | -1.606838  | 0.10808992 | 0.34731645 |
| Cox7b2      | 297.229367 | -0.3312084 | 0.27257123 | -1.2151261 | 0.22431799 | 0.51368924 |
| Nfatc4      | 676.512333 | -0.3313181 | 0.26098493 | -1.2694915 | 0.20426582 | 0.48937571 |
| 2810004N23I | 6347.79326 | -0.3317083 | 0.19485667 | -1.7023195 | 0.0886955  | 0.30995588 |
| Haus8       | 3617.8281  | -0.3317508 | 0.19165418 | -1.7309863 | 0.0834542  | 0.29916365 |
| Ap5m1       | 1859.17801 | -0.3317674 | 0.2160307  | -1.5357419 | 0.12460171 | 0.37712751 |
| Sycp1-ps1   | 13.4691067 | -0.3318114 | 0.37135059 | -0.893526  | 0.37157558 | 0.66164325 |
| Snora3      | 127.165659 | -0.3318991 | 0.33673384 | -0.9856423 | 0.32430865 | 0.618534   |
| Rassf10     | 105.043449 | -0.3320764 | 0.39418417 | -0.8424398 | 0.3995418  | 0.68486983 |
| 2700049A03f | 3524.29956 | -0.3320921 | 0.17880536 | -1.8572827 | 0.06327094 | 0.25427286 |
| Panx2       | 4.31832148 | -0.3321513 | 0.37972113 | -0.8747242 | 0.38172396 | NA         |
| Zfp62       | 3533.61535 | -0.332201  | 0.19634765 | -1.6919023 | 0.0906646  | 0.31345603 |
| Scn8a       | 341.701444 | -0.3322727 | 0.2320469  | -1.4319205 | 0.15216656 | 0.41956422 |
| Brcc3       | 2791.12049 | -0.3323101 | 0.15957442 | -2.082477  | 0.03729892 | 0.18314982 |
| Papola      | 24613.929  | -0.3324641 | 0.17549384 | -1.8944488 | 0.05816546 | 0.24103255 |
| Defb5       | 2.70951245 | -0.3324707 | 0.26363332 | -1.2611103 | 0.20726913 | NA         |
| 0610010K14f | 2329.60172 | -0.3325948 | 0.22526813 | -1.4764399 | 0.13982584 | 0.39971171 |
| Rsrc2       | 11550.0126 | -0.332634  | 0.16650457 | -1.9977467 | 0.04574413 | 0.20779516 |
| Slc36a1     | 1387.5049  | -0.3327138 | 0.1807377  | -1.8408657 | 0.06564124 | 0.25941219 |
| Eme1        | 3230.38729 | -0.3327664 | 0.20193389 | -1.6478978 | 0.09937364 | 0.32992302 |
| 1200014J11R | 12035.3985 | -0.3329401 | 0.17905871 | -1.8593906 | 0.06297179 | 0.25350099 |
| A330050F15f | 1.84075221 | -0.3330379 | 0.28994126 | -1.1486392 | 0.25070477 | NA         |
| Wdr93       | 127.608722 | -0.3331081 | 0.38823121 | -0.8580147 | 0.39088434 | 0.67903559 |
| Ddx18       | 7283.84562 | -0.333188  | 0.1563398  | -2.1311781 | 0.03307448 | 0.16974956 |
| Abhd16a     | 918.31672  | -0.3332963 | 0.25557606 | -1.3040985 | 0.19220002 | 0.4751259  |
| Mak         | 186.152395 | -0.3333137 | 0.26324161 | -1.2661893 | 0.20544531 | 0.49038835 |
| 3110052M02  | 210.083615 | -0.3333571 | 0.28592434 | -1.1658928 | 0.24365781 | 0.535868   |
| Slc7a2      | 365.858564 | -0.3335974 | 0.42137172 | -0.7916939 | 0.4285392  | 0.7047819  |
| Hmgb3       | 1247.32761 | -0.3336599 | 0.19368334 | -1.7227085 | 0.08494126 | 0.30220122 |
| Nipbl       | 7103.70667 | -0.3337126 | 0.25490742 | -1.3091521 | 0.19048284 | 0.47243998 |
| Ctcf        | 12492.5514 | -0.3339743 | 0.20898977 | -1.5980414 | 0.11003376 | 0.35049876 |
| Arhgap6     | 4.14948502 | -0.3340557 | 0.38552449 | -0.8664967 | 0.38621782 | NA         |
| U2surp      | 23412.4072 | -0.3341553 | 0.16522009 | -2.0224857 | 0.0431262  | 0.20019567 |
| Abcc4       | 5009.28593 | -0.3342017 | 0.21836267 | -1.5304894 | 0.12589564 | 0.37885621 |
| Psm11       | 10679.7278 | -0.3343173 | 0.20676595 | -1.6168877 | 0.10590252 | 0.34267377 |
| Tert        | 1152.6732  | -0.3343483 | 0.23889952 | -1.3995353 | 0.16165251 | 0.43260337 |
| Pex26       | 1252.83564 | -0.3344021 | 0.22767037 | -1.4687996 | 0.14188716 | 0.40253636 |
| Map3k4      | 3469.28467 | -0.3345035 | 0.21322883 | -1.5687539 | 0.11670531 | 0.36261569 |

|             |            |            |            |            |            |            |
|-------------|------------|------------|------------|------------|------------|------------|
| Pdia6       | 28415.5325 | -0.3345735 | 0.1965349  | -1.702362  | 0.08868752 | 0.30995588 |
| Rft1        | 841.959517 | -0.3348698 | 0.16874788 | -1.9844385 | 0.04720698 | 0.21149979 |
| Ppp6r2      | 868.103236 | -0.3349179 | 0.1990084  | -1.6829335 | 0.09238796 | 0.31658914 |
| Snrpd1      | 8859.51774 | -0.3350281 | 0.20070802 | -1.6692313 | 0.09507154 | 0.32196376 |
| Ccdc8       | 628.613621 | -0.3350919 | 0.26678504 | -1.2560369 | 0.20910259 | 0.49516588 |
| Ptgir       | 7.3321641  | -0.3351272 | 0.32879523 | -1.019258  | 0.30808051 | 0.60283181 |
| Actb        | 117448.818 | -0.3352371 | 0.24884229 | -1.3471872 | 0.17791995 | 0.45556244 |
| Sergef      | 520.580939 | -0.3352548 | 0.28115665 | -1.1924127 | 0.23309946 | 0.5247835  |
| Capn12      | 53.8206284 | -0.3353164 | 0.42318873 | -0.7923566 | 0.42815276 | 0.70472095 |
| Arsg        | 80.3213854 | -0.3353509 | 0.38930618 | -0.8614067 | 0.38901411 | 0.67794934 |
| Atp5g2      | 2075.62837 | -0.3354313 | 0.21101674 | -1.5895955 | 0.111926   | 0.35384454 |
| Stam        | 5106.80575 | -0.3354432 | 0.16244023 | -2.0650254 | 0.0389206  | 0.18833006 |
| Ythdf3      | 8428.59256 | -0.3355186 | 0.21460421 | -1.5634297 | 0.11795155 | 0.36473744 |
| Cpsf3l      | 5513.61963 | -0.335807  | 0.14222897 | -2.3610311 | 0.0182242  | 0.11619705 |
| Hdac2       | 20462.6214 | -0.3359398 | 0.17091562 | -1.9655299 | 0.04935294 | 0.21783943 |
| Rad51d      | 1691.69707 | -0.3365625 | 0.26233265 | -1.2829607 | 0.19950586 | 0.48250548 |
| Rorc        | 11.2952677 | -0.3368326 | 0.42506082 | -0.792434  | 0.42810769 | 0.70472095 |
| Fmr1        | 9817.78713 | -0.3368331 | 0.19400913 | -1.7361716 | 0.0825335  | 0.29737683 |
| Rps15       | 56474.6619 | -0.3368971 | 0.23974394 | -1.4052371 | 0.15995077 | 0.43124038 |
| Dpp8        | 2999.62812 | -0.3371699 | 0.16297626 | -2.0688281 | 0.03856222 | 0.18757618 |
| Taf8        | 2768.44038 | -0.3372206 | 0.19298228 | -1.7474175 | 0.08056494 | 0.2929309  |
| Ano10       | 260.079399 | -0.3372357 | 0.30523824 | -1.1048279 | 0.26923418 | 0.56222112 |
| Xrcc6bp1    | 729.887434 | -0.3372574 | 0.19227522 | -1.7540347 | 0.07942456 | 0.29073126 |
| Gjc1        | 4865.45006 | -0.3373373 | 0.25013538 | -1.3486188 | 0.17745944 | 0.45494095 |
| Wapal       | 17630.2416 | -0.3373427 | 0.20273164 | -1.6639867 | 0.09611509 | 0.32399322 |
| Nup160      | 11793.1272 | -0.337411  | 0.21264355 | -1.5867444 | 0.11257055 | 0.35516021 |
| Heatr1      | 12615.7396 | -0.33752   | 0.25490077 | -1.3241231 | 0.18546215 | 0.46600774 |
| 4930465K10F | 2.52137352 | -0.3376194 | 0.35644514 | -0.9471847 | 0.34354469 | NA         |
| Dnm1l       | 16633.8903 | -0.3376229 | 0.1732116  | -1.9491936 | 0.05127231 | 0.22283815 |
| Rprml       | 6.13171235 | -0.3378152 | 0.42185931 | -0.8007769 | 0.4232608  | 0.70209373 |
| Tpd52l2     | 7265.66752 | -0.3379666 | 0.17711543 | -1.9081713 | 0.05636908 | 0.23659797 |
| 1300002K09F | 82.2065706 | -0.3379901 | 0.37200631 | -0.9085601 | 0.36358237 | 0.6537332  |
| Fam175a     | 2162.8721  | -0.3380872 | 0.19555856 | -1.7288283 | 0.08383983 | 0.2998942  |
| Gm16702     | 2.81962456 | -0.3380915 | 0.30108986 | -1.1228923 | 0.26148325 | NA         |
| Slc5a9      | 2.62161935 | -0.3381348 | 0.30071543 | -1.1244346 | 0.2608287  | NA         |
| Wdr92       | 4267.33184 | -0.338165  | 0.1710669  | -1.9767999 | 0.04806425 | 0.21441399 |
| Zfp938      | 992.878079 | -0.3384092 | 0.18338216 | -1.8453771 | 0.0649827  | 0.25826729 |
| Fabp5       | 862.60386  | -0.3384995 | 0.34146796 | -0.9913068 | 0.32153577 | 0.6157127  |
| E330017A01F | 5.1504459  | -0.3387101 | 0.34262955 | -0.9885607 | 0.32287813 | NA         |
| Kif6        | 13.7699513 | -0.3388763 | 0.43193489 | -0.7845541 | 0.43271504 | 0.70789874 |
| Fam181b     | 96.0516606 | -0.3388837 | 0.40512648 | -0.8364886 | 0.40288006 | 0.68740218 |

|             |            |            |            |            |            |            |
|-------------|------------|------------|------------|------------|------------|------------|
| Gipc3       | 8.18744083 | -0.3389748 | 0.42181079 | -0.803618  | 0.42161761 | 0.70108805 |
| Syng3       | 131.637262 | -0.3390461 | 0.32902811 | -1.0304472 | 0.30280015 | 0.59794858 |
| Golt1b      | 5741.67583 | -0.3391634 | 0.15603654 | -2.1736151 | 0.02973405 | 0.15846274 |
| Ncaph       | 6252.40866 | -0.3394106 | 0.1830106  | -1.8545951 | 0.06365407 | 0.25512485 |
| Snai3       | 71.4693831 | -0.3395169 | 0.39976484 | -0.8492915 | 0.39571909 | 0.68269664 |
| Eif4e       | 11726.0189 | -0.3395386 | 0.15402492 | -2.204439  | 0.02749348 | 0.15103366 |
| Dock6       | 8728.43406 | -0.3396606 | 0.27111207 | -1.2528419 | 0.21026324 | 0.49693065 |
| AU041133    | 102.166296 | -0.3397426 | 0.31457107 | -1.0800185 | 0.28013395 | 0.57238012 |
| Ppp1r21     | 2358.28864 | -0.3397753 | 0.21452397 | -1.5838571 | 0.11322624 | 0.35655018 |
| H2afz       | 28258.1769 | -0.3397827 | 0.18697042 | -1.8173071 | 0.0691701  | 0.26764473 |
| Nup133      | 11292.4665 | -0.3398013 | 0.22669089 | -1.4989632 | 0.13388317 | 0.39106257 |
| Bace2       | 5.09717661 | -0.3403199 | 0.41092601 | -0.828178  | 0.4075697  | NA         |
| Dnttip2     | 12791.4727 | -0.3404781 | 0.19265782 | -1.7672684 | 0.07718329 | 0.28544051 |
| Slc7a1      | 10905.5552 | -0.3405379 | 0.2272845  | -1.4982892 | 0.13405814 | 0.39131561 |
| Mir7061     | 2.11504463 | -0.3407395 | 0.31302776 | -1.088528  | 0.2763621  | NA         |
| Miox        | 2.11504463 | -0.3407395 | 0.31302776 | -1.088528  | 0.2763621  | NA         |
| Ktn1        | 9785.19718 | -0.3407458 | 0.29685373 | -1.1478576 | 0.25102737 | 0.54460318 |
| Bnip2       | 3094.48783 | -0.3407989 | 0.17923135 | -1.9014468 | 0.05724351 | 0.23865959 |
| Zfp507      | 3601.51718 | -0.3408203 | 0.20296189 | -1.6792332 | 0.09310661 | 0.31752214 |
| Mtif2       | 4988.58829 | -0.3410259 | 0.18787057 | -1.815217  | 0.06949057 | 0.26821738 |
| Cct7        | 46816.7106 | -0.3411099 | 0.15962967 | -2.1368829 | 0.03260752 | 0.16846496 |
| Setbp1      | 63.9468638 | -0.34121   | 0.3759075  | -0.9076966 | 0.36403852 | 0.65406636 |
| Oxa1l       | 5275.60314 | -0.3412652 | 0.19783478 | -1.7250009 | 0.08452732 | 0.30148722 |
| Traf3ip1    | 1312.83635 | -0.3413044 | 0.2065781  | -1.6521809 | 0.09849767 | 0.32827632 |
| Lamc3       | 28.1810753 | -0.3413255 | 0.41021156 | -0.8320719 | 0.40536838 | 0.68925034 |
| Itpripl1    | 528.87949  | -0.3414925 | 0.30481647 | -1.1203216 | 0.26257674 | 0.5549512  |
| Akna        | 830.573206 | -0.3417975 | 0.24758038 | -1.3805515 | 0.16741692 | 0.44231821 |
| Ccdc137     | 1482.10801 | -0.3419916 | 0.17157171 | -1.9932864 | 0.0462301  | 0.20896764 |
| Tom1        | 355.423769 | -0.3419967 | 0.22251486 | -1.5369613 | 0.12430279 | 0.3765159  |
| Gm7008      | 6.95254646 | -0.3422538 | 0.42340183 | -0.8083428 | 0.41889324 | 0.69962505 |
| Fdft1       | 10594.7971 | -0.342482  | 0.19695881 | -1.738851  | 0.08206098 | 0.29629216 |
| Klhl24      | 3994.89243 | -0.3425363 | 0.23985016 | -1.4281264 | 0.15325548 | 0.4210512  |
| Swsap1      | 709.855984 | -0.3425387 | 0.24497465 | -1.3982618 | 0.16203447 | 0.43326619 |
| Cstf2t      | 5084.61794 | -0.3427554 | 0.15986182 | -2.1440729 | 0.03202704 | 0.1664297  |
| Csrp2       | 6794.88936 | -0.3427973 | 0.30378928 | -1.1284049 | 0.25914897 | 0.55130309 |
| Grb14       | 61.845278  | -0.3429029 | 0.39459469 | -0.8690003 | 0.38484696 | 0.67403481 |
| Chd6        | 4294.1959  | -0.3430116 | 0.21565498 | -1.5905572 | 0.11170926 | 0.35356943 |
| Haus2       | 5942.73997 | -0.3432474 | 0.23695275 | -1.4485899 | 0.14745214 | 0.41204462 |
| Fbxo3       | 3618.27396 | -0.3434923 | 0.16062274 | -2.1385037 | 0.03247588 | 0.16800813 |
| 4930479D17I | 3.1656596  | -0.3435229 | 0.35769938 | -0.9603675 | 0.33687031 | NA         |
| Brinp2      | 13.772485  | -0.3435724 | 0.42901106 | -0.8008475 | 0.42321997 | 0.70209373 |

|             |            |            |            |            |            |            |
|-------------|------------|------------|------------|------------|------------|------------|
| Pias1       | 2476.82769 | -0.3436785 | 0.1727263  | -1.9897291 | 0.04662078 | 0.20988317 |
| Eya1        | 756.265986 | -0.3438103 | 0.3218707  | -1.0681628 | 0.2854471  | 0.57844513 |
| Pms1        | 3149.48631 | -0.3441003 | 0.16952178 | -2.0298295 | 0.04237387 | 0.19800363 |
| Sass6       | 1896.09028 | -0.3441985 | 0.18389067 | -1.8717563 | 0.06124032 | 0.24924059 |
| Nrip1       | 758.008068 | -0.3442896 | 0.32414256 | -1.0621549 | 0.28816538 | 0.58175514 |
| Rab38       | 703.182783 | -0.344442  | 0.30604837 | -1.1254494 | 0.26039863 | 0.5523497  |
| Timm44      | 6353.56138 | -0.3444986 | 0.18512336 | -1.8609138 | 0.06275636 | 0.25283008 |
| Dgkh        | 500.262567 | -0.344507  | 0.21675252 | -1.5894025 | 0.11196955 | 0.35385899 |
| Atxn7l1     | 392.830183 | -0.3445719 | 0.28609695 | -1.2043886 | 0.2284394  | 0.51911442 |
| Cd59b       | 144.364028 | -0.3447642 | 0.26206886 | -1.3155481 | 0.18832577 | 0.46953088 |
| Vangl2      | 1646.34108 | -0.3448177 | 0.23205551 | -1.4859279 | 0.1372982  | 0.39568649 |
| Zfp810      | 626.844931 | -0.3448324 | 0.18771611 | -1.8369889 | 0.06621153 | 0.26073829 |
| Spo11       | 3.66516181 | -0.3449172 | 0.38954888 | -0.8854272 | 0.37592624 | NA         |
| 4930520004l | 85.8924693 | -0.3449566 | 0.39687433 | -0.8691834 | 0.38474685 | 0.67393886 |
| Fndc3c1     | 6.72406615 | -0.3450101 | 0.41980731 | -0.8218296 | 0.4111739  | 0.69366081 |
| Twf2        | 4380.5027  | -0.3450764 | 0.26585711 | -1.2979769 | 0.19429526 | 0.47695117 |
| Aatf        | 4282.34282 | -0.3451896 | 0.21615246 | -1.5969727 | 0.11027179 | 0.35104127 |
| Fh1         | 9791.05415 | -0.3452382 | 0.19108997 | -1.8066788 | 0.07081238 | 0.27074168 |
| Huwe1       | 32552.6652 | -0.3454361 | 0.2666749  | -1.2953454 | 0.1952011  | 0.47806832 |
| Preli1      | 11071.5279 | -0.3455758 | 0.19913958 | -1.7353448 | 0.08267975 | 0.29783481 |
| Pnrc2       | 6244.76191 | -0.3457663 | 0.17147443 | -2.0164304 | 0.04375499 | 0.20199689 |
| Zfp383      | 2454.73807 | -0.3457997 | 0.16403063 | -2.1081411 | 0.03501878 | 0.17675336 |
| Nudt13      | 362.473387 | -0.3458028 | 0.22857122 | -1.5128886 | 0.13030796 | 0.38615039 |
| Usp34       | 12737.7306 | -0.3460063 | 0.28668576 | -1.2069184 | 0.22746356 | 0.51767684 |
| Litaf       | 2893.49638 | -0.3460102 | 0.22489787 | -1.5385217 | 0.12392111 | 0.37572572 |
| Sike1       | 2869.74075 | -0.3460809 | 0.15504994 | -2.2320608 | 0.02561094 | 0.1446172  |
| Exoc6b      | 6879.50361 | -0.3461196 | 0.23049201 | -1.5016554 | 0.13318612 | 0.39019921 |
| Clspn       | 4436.6779  | -0.3461932 | 0.18859988 | -1.8355962 | 0.0664174  | 0.26121826 |
| Epha10      | 109.021052 | -0.3462056 | 0.31830784 | -1.0876441 | 0.27675227 | 0.56928593 |
| Ndufa6      | 7897.51715 | -0.3463182 | 0.24111472 | -1.4363212 | 0.15091097 | 0.41773167 |
| Myl2        | 36.0176346 | -0.3466446 | 0.42598327 | -0.8137517 | 0.4157872  | 0.69783135 |
| Mir8094     | 9.54243049 | -0.3467507 | 0.43166731 | -0.8032823 | 0.42181157 | 0.7012606  |
| Sync        | 426.736639 | -0.346827  | 0.24170492 | -1.4349193 | 0.15131011 | 0.41838967 |
| Meox1       | 6.57127455 | -0.3468413 | 0.37114835 | -0.9345085 | 0.35004168 | 0.64198366 |
| Atf1        | 4289.04351 | -0.3469291 | 0.19285253 | -1.7989344 | 0.07202906 | 0.27371972 |
| AU021063    | 3.92570584 | -0.3469725 | 0.37414009 | -0.9273865 | 0.35372588 | NA         |
| Atxn3       | 7074.29273 | -0.3470433 | 0.2137673  | -1.6234631 | 0.10449045 | 0.3398475  |
| Cbx7        | 8151.50291 | -0.3470769 | 0.20033389 | -1.732492  | 0.08318601 | 0.2988278  |
| Slc25a46    | 2947.77808 | -0.3470814 | 0.19138895 | -1.8134872 | 0.06975671 | 0.26889366 |
| 2010107G23l | 582.359428 | -0.3471033 | 0.25997782 | -1.3351268 | 0.18183487 | 0.46099022 |
| Rnf26       | 1281.58476 | -0.3471649 | 0.24895444 | -1.3944915 | 0.16316922 | 0.43516456 |

|             |            |            |            |            |            |            |
|-------------|------------|------------|------------|------------|------------|------------|
| Cpq         | 26.1930545 | -0.3476365 | 0.43049959 | -0.8075188 | 0.41936764 | 0.70003741 |
| Xrn2        | 17027.4677 | -0.3477685 | 0.1879206  | -1.8506143 | 0.06422506 | 0.25666076 |
| Acy1        | 3779.646   | -0.3478667 | 0.23574964 | -1.475577  | 0.14005748 | 0.40007969 |
| Plrg1       | 7286.03042 | -0.3478936 | 0.16990398 | -2.0475895 | 0.04060024 | 0.19303026 |
| Slc31a1     | 6967.3239  | -0.347903  | 0.17010766 | -2.0451929 | 0.04083584 | 0.19366826 |
| Dazap1      | 9134.8676  | -0.3479038 | 0.17560686 | -1.9811517 | 0.04757426 | 0.21289995 |
| Prrg3       | 417.177838 | -0.3479974 | 0.33913377 | -1.026136  | 0.30482748 | 0.59961979 |
| Cst3        | 6613.49566 | -0.3480943 | 0.23825963 | -1.4609875 | 0.14401888 | 0.40573145 |
| Aars        | 42743.3777 | -0.3481077 | 0.16694684 | -2.0851413 | 0.03705647 | 0.18253571 |
| 4933417D19I | 11.5299471 | -0.3482067 | 0.43002378 | -0.8097383 | 0.41809058 | 0.69896008 |
| Gm10416     | 702.114009 | -0.3484109 | 0.25712052 | -1.3550488 | 0.17540201 | 0.45309298 |
| Fance       | 1628.56512 | -0.3484185 | 0.1997645  | -1.7441463 | 0.08113359 | 0.2944477  |
| Lrrc61      | 310.698734 | -0.3484701 | 0.22383525 | -1.556815  | 0.11951442 | 0.3678877  |
| Ncor1       | 19831.1582 | -0.3484901 | 0.22350901 | -1.5591771 | 0.11895446 | 0.36681756 |
| Krt16       | 40.215242  | -0.3486108 | 0.43022759 | -0.810294  | 0.41777124 | 0.69872666 |
| Nupl1       | 4892.24281 | -0.3486127 | 0.22458828 | -1.5522302 | 0.12060715 | 0.36940975 |
| Foxa3       | 97.441473  | -0.3486325 | 0.37297367 | -0.9347376 | 0.34992355 | 0.64198366 |
| Cdc16       | 7494.41296 | -0.3486339 | 0.18080279 | -1.9282553 | 0.05382338 | 0.23001027 |
| Dhx36       | 10856.5673 | -0.3486666 | 0.19548741 | -1.7835758 | 0.07449263 | 0.27900647 |
| Efna1       | 160.692658 | -0.3486731 | 0.30924807 | -1.1274868 | 0.25953673 | 0.55161456 |
| 6430571L13F | 52.982996  | -0.3488392 | 0.34975204 | -0.9973901 | 0.31857519 | 0.61238106 |
| Kbtbd3      | 172.689664 | -0.3490723 | 0.26559557 | -1.3143    | 0.18874528 | 0.47007972 |
| Prpf19      | 16267.4224 | -0.3492099 | 0.20370505 | -1.7142921 | 0.08647509 | 0.30564466 |
| Flrt1       | 45.7699918 | -0.349246  | 0.35920644 | -0.9722709 | 0.33091582 | 0.62414456 |
| Rab34       | 1535.46663 | -0.3495086 | 0.21568831 | -1.6204336 | 0.10513917 | 0.34141141 |
| Tcerg1l     | 8.19353945 | -0.3495251 | 0.42579594 | -0.8208746 | 0.41171771 | 0.69427696 |
| Tipin       | 13847.2984 | -0.3497033 | 0.19862449 | -1.7606252 | 0.07830186 | 0.28826774 |
| Gm5803      | 21.4317136 | -0.3497868 | 0.41328815 | -0.8463508 | 0.39735707 | 0.68347116 |
| Hist1h3c    | 30.2366271 | -0.3498618 | 0.43085166 | -0.8120237 | 0.41677802 | 0.69852668 |
| Egfl7       | 1539.25331 | -0.3498945 | 0.21596379 | -1.6201538 | 0.10519924 | 0.34146388 |
| Cyp20a1     | 1698.35679 | -0.3499048 | 0.19344362 | -1.8088207 | 0.07047886 | 0.2702211  |
| Rpl35       | 17022.5646 | -0.3499913 | 0.20990665 | -1.6673666 | 0.09544153 | 0.32279496 |
| Bbs9        | 1806.1889  | -0.3501769 | 0.19976253 | -1.7529658 | 0.07960788 | 0.291203   |
| Cep41       | 796.175825 | -0.350214  | 0.19078753 | -1.8356233 | 0.06641339 | 0.26121826 |
| 4930548H24I | 2.53475178 | -0.3502521 | 0.33519907 | -1.0449078 | 0.29606557 | NA         |
| Nras        | 11466.546  | -0.3504137 | 0.14364273 | -2.4394808 | 0.01470838 | 0.10027622 |
| Zfp182      | 1106.31489 | -0.3504352 | 0.18069761 | -1.9393462 | 0.0524592  | 0.22660917 |
| Pelp1       | 10662.4748 | -0.3505204 | 0.22533328 | -1.5555643 | 0.11981174 | 0.36829263 |
| H2afx       | 14087.8955 | -0.3506857 | 0.2350731  | -1.4918154 | 0.13574754 | 0.39340478 |
| Fert2       | 2504.24267 | -0.3507094 | 0.16676451 | -2.1030216 | 0.03546388 | 0.17836314 |
| 1700019D03I | 1097.57985 | -0.3507485 | 0.22669356 | -1.5472364 | 0.12180625 | 0.37177801 |

|         |            |            |            |            |            |            |
|---------|------------|------------|------------|------------|------------|------------|
| Fem1c   | 2999.34633 | -0.3507909 | 0.23240743 | -1.5093793 | 0.13120189 | 0.38740968 |
| Necap1  | 7018.00911 | -0.350891  | 0.16051142 | -2.186081  | 0.02880968 | 0.1556163  |
| Fgf15   | 69.240773  | -0.3509564 | 0.39369074 | -0.8914519 | 0.37268677 | 0.66269681 |
| Lgi3    | 8.93940388 | -0.3510224 | 0.40781024 | -0.8607494 | 0.38937606 | 0.67794934 |
| Slc20a2 | 5489.72697 | -0.3510728 | 0.20573831 | -1.7064046 | 0.08793278 | 0.30877503 |
| Ankrd50 | 676.812089 | -0.3510988 | 0.2197736  | -1.5975477 | 0.11014368 | 0.35077707 |
| Sil1    | 1200.42062 | -0.3511361 | 0.24818661 | -1.4148069 | 0.15712513 | 0.42655183 |
| Msantd2 | 2354.00515 | -0.3511447 | 0.18050232 | -1.9453751 | 0.05172985 | 0.224078   |
| Samd7   | 160.439795 | -0.3512549 | 0.39359725 | -0.8924221 | 0.37216672 | 0.66226853 |
| Ldlr    | 10880.476  | -0.3513685 | 0.1939088  | -1.8120299 | 0.06998158 | 0.26937713 |
| Trmt10b | 1129.88214 | -0.351388  | 0.19148246 | -1.8350921 | 0.06649204 | 0.26137959 |
| Cd151   | 3922.81118 | -0.3514965 | 0.17392752 | -2.0209366 | 0.04328632 | 0.20057975 |
| Txn1    | 25220.4611 | -0.3517471 | 0.19623308 | -1.7924967 | 0.07305344 | 0.27560749 |
| Ifngr1  | 386.868385 | -0.3518718 | 0.27025805 | -1.3019846 | 0.19292166 | 0.47560633 |
| Slc5a11 | 714.993697 | -0.3518781 | 0.30090894 | -1.1693841 | 0.24224893 | 0.53458396 |
| Smg5    | 11749.6255 | -0.3518888 | 0.20327713 | -1.7310794 | 0.08343761 | 0.29916365 |
| Eml4    | 10262.2049 | -0.3520638 | 0.21934454 | -1.6050722 | 0.10847792 | 0.348038   |
| Tmem130 | 104.58774  | -0.3520958 | 0.42098852 | -0.8363548 | 0.40295533 | 0.68740218 |
| Angptl4 | 1512.81967 | -0.3523255 | 0.1942816  | -1.8134784 | 0.06975806 | 0.26889366 |
| Rps27a  | 67993.5331 | -0.3524075 | 0.23262994 | -1.5148847 | 0.1298016  | 0.38521845 |
| Arhgdia | 21063.529  | -0.352897  | 0.21871887 | -1.6134729 | 0.1066418  | 0.34442091 |
| Gm608   | 2658.03177 | -0.3529075 | 0.20169111 | -1.7497427 | 0.08016273 | 0.29199838 |
| Mvb12a  | 2354.57008 | -0.3529848 | 0.24592381 | -1.4353421 | 0.15118965 | 0.41838967 |
| Gtl3    | 3591.50045 | -0.3530718 | 0.20729917 | -1.7031991 | 0.08853081 | 0.30976524 |
| Sned1   | 30.7960224 | -0.3531663 | 0.42964981 | -0.8219863 | 0.41108467 | 0.69365847 |
| L1td1   | 23714.5668 | -0.3532302 | 0.24862779 | -1.4207191 | 0.15539844 | 0.4238164  |
| Mrpl42  | 7835.03966 | -0.3532498 | 0.20753491 | -1.7021225 | 0.0887324  | 0.31001518 |
| Mir186  | 32.9916067 | -0.3533079 | 0.38805518 | -0.9104578 | 0.36258111 | 0.65337545 |
| Mboat2  | 1991.09164 | -0.3534424 | 0.16690745 | -2.117595  | 0.03420938 | 0.17358019 |
| Pik3ca  | 3543.9872  | -0.353538  | 0.18865111 | -1.8740311 | 0.06092613 | 0.2485473  |
| Nod2    | 172.016349 | -0.3535932 | 0.42830941 | -0.8255556 | NA         | NA         |
| Clec2i  | 4.1048906  | -0.3536203 | 0.35345482 | -1.0004683 | 0.31708394 | NA         |
| Cpsf6   | 11692.536  | -0.3537655 | 0.19318516 | -1.8312252 | 0.06706694 | 0.26304109 |
| Insr    | 1481.0219  | -0.353875  | 0.27501134 | -1.2867653 | 0.19817612 | 0.4811611  |
| Ubiad1  | 1314.26475 | -0.3538928 | 0.17519839 | -2.0199548 | 0.04338808 | 0.20081191 |
| Mtus1   | 3310.56507 | -0.353901  | 0.27652937 | -1.2797954 | 0.20061711 | 0.48436526 |
| Zfp189  | 541.158553 | -0.3539297 | 0.19936906 | -1.7752489 | 0.0758568  | 0.28207774 |
| Abhd14a | 1385.90139 | -0.3539419 | 0.19046094 | -1.8583436 | 0.06312023 | 0.25390138 |
| Klhdc9  | 74.1689204 | -0.354004  | 0.39060911 | -0.9062871 | 0.36478391 | 0.6548307  |
| Pcmdt1  | 4800.84879 | -0.3543026 | 0.19606543 | -1.8070631 | 0.07075245 | 0.27060288 |
| Lif     | 747.99947  | -0.3543461 | 0.28291966 | -1.2524619 | 0.21040162 | 0.49718212 |



|             |            |            |            |            |            |            |
|-------------|------------|------------|------------|------------|------------|------------|
| Aldoart1    | 49.4465089 | -0.3543851 | 0.38127297 | -0.9294788 | 0.352641   | 0.64439796 |
| Pde8a       | 2301.94418 | -0.3544957 | 0.22424601 | -1.5808338 | 0.11391605 | 0.35780823 |
| Nmu         | 7.40962806 | -0.3545778 | 0.42006607 | -0.8441001 | 0.39861345 | 0.68450064 |
| Lrfn4       | 895.738486 | -0.3546817 | 0.22009745 | -1.6114757 | 0.10707608 | 0.34516082 |
| Ptma        | 91962.5374 | -0.3547225 | 0.16065079 | -2.2080347 | 0.02724186 | 0.15011981 |
| Zfp263      | 3432.93331 | -0.3547718 | 0.14558135 | -2.4369319 | 0.01481247 | 0.10067689 |
| Twistnb     | 3495.6015  | -0.3548117 | 0.15641734 | -2.2683653 | 0.02330695 | 0.13636812 |
| Mcrs1       | 4262.96767 | -0.3549299 | 0.17303597 | -2.0511914 | 0.04024831 | 0.19194171 |
| Setd2       | 8619.59485 | -0.354957  | 0.25592213 | -1.3869725 | 0.16545013 | 0.43892642 |
| Prkdc       | 4610.35602 | -0.3550838 | 0.22726    | -1.5624562 | 0.11818056 | 0.36537293 |
| Cenpk       | 1242.92057 | -0.3553017 | 0.21537762 | -1.6496686 | 0.09901074 | 0.32906946 |
| 2310022B05f | 1320.64371 | -0.3553703 | 0.2486571  | -1.4291581 | 0.15295881 | 0.42063558 |
| Wdr17       | 17.875936  | -0.3554471 | 0.43218811 | -0.822436  | 0.41082877 | 0.69330421 |
| Hk2         | 23208.1321 | -0.3555155 | 0.16963654 | -2.0957484 | 0.03610451 | 0.1803602  |
| Ngef        | 55.8922953 | -0.3555757 | 0.41569742 | -0.8553713 | 0.3923456  | 0.68027277 |
| Sec13       | 7680.77995 | -0.3555798 | 0.19031654 | -1.8683601 | 0.06171189 | 0.25017768 |
| Kcnj16      | 1.94170072 | -0.3556002 | 0.27105418 | -1.3119157 | 0.18954859 | NA         |
| Pfdn4       | 3749.992   | -0.3559565 | 0.17526208 | -2.0309954 | 0.04225546 | 0.19756905 |
| Tubgcp5     | 3137.56855 | -0.355987  | 0.1733599  | -2.0534565 | 0.04002833 | 0.19132821 |
| Pdk1        | 3641.08668 | -0.3560409 | 0.24652115 | -1.444261  | 0.14866558 | 0.41372557 |
| Il22ra1     | 10.2243377 | -0.3560782 | 0.42987973 | -0.8283206 | 0.40748896 | 0.69134419 |
| Smarcd1     | 7997.35977 | -0.3562612 | 0.23390148 | -1.5231252 | 0.12772738 | 0.38170982 |
| Stat5b      | 979.37988  | -0.356388  | 0.2107052  | -1.6914059 | 0.09075931 | 0.313644   |
| Yif1b       | 3077.44964 | -0.3564088 | 0.18714001 | -1.9045035 | 0.05684464 | 0.23756811 |
| Ccdc14      | 2817.23633 | -0.3565053 | 0.18150497 | -1.9641629 | 0.0495112  | 0.21836322 |
| Gid4        | 5898.63068 | -0.3566494 | 0.16707339 | -2.134687  | 0.03278659 | 0.16899709 |
| Dnajc4      | 740.340855 | -0.3566828 | 0.24186771 | -1.4747018 | 0.14029273 | 0.40038397 |
| Cpne7       | 48.8489883 | -0.3566996 | 0.41564432 | -0.8581848 | 0.39079045 | 0.67903559 |
| Syngap1     | 262.778133 | -0.3568259 | 0.26830584 | -1.3299222 | 0.18354392 | 0.46376482 |
| Impdh1      | 2985.84764 | -0.3568315 | 0.20718925 | -1.7222491 | 0.08502441 | 0.30228957 |
| Cyfp2       | 1106.93158 | -0.3569396 | 0.2861471  | -1.2473988 | 0.2122513  | 0.49892572 |
| Cela1       | 46.3559252 | -0.35709   | 0.42026637 | -0.8496754 | 0.39550558 | 0.68263121 |
| Mib1        | 2069.16796 | -0.3571581 | 0.31223348 | -1.1438814 | 0.25267283 | 0.54598821 |
| Scube2      | 32.8085556 | -0.3571581 | 0.43154916 | -0.8276185 | 0.40788658 | 0.69171692 |
| Zcchc9      | 1458.54536 | -0.35723   | 0.16624843 | -2.148772  | 0.03165247 | 0.16545467 |
| 2700046A07f | 42.7942303 | -0.3572719 | 0.40541116 | -0.8812581 | 0.37817815 | 0.66769396 |
| Fetub       | 1352.99954 | -0.3574604 | 0.28281281 | -1.2639469 | 0.2062491  | 0.49102568 |
| Mobp        | 265.154197 | -0.3574928 | 0.32677821 | -1.093992  | 0.27395848 | 0.56683453 |
| Pik3c2b     | 1149.7228  | -0.3576242 | 0.25949975 | -1.3781291 | 0.16816344 | 0.44308872 |
| 4921536K21f | 44.9515933 | -0.3576387 | 0.35299406 | -1.013158  | 0.31098471 | 0.60557516 |
| Ska2        | 2809.05621 | -0.3577268 | 0.20086436 | -1.780937  | 0.07492275 | 0.2800778  |

|             |            |            |            |            |            |            |
|-------------|------------|------------|------------|------------|------------|------------|
| Ckap2       | 9947.62154 | -0.3577513 | 0.21283921 | -1.6808526 | 0.09279155 | 0.31711237 |
| BC003331    | 2054.6963  | -0.3578473 | 0.18533494 | -1.9308138 | 0.05350608 | 0.22915812 |
| Whsc1       | 5098.66288 | -0.3578648 | 0.24372329 | -1.4683241 | 0.1420162  | 0.40278933 |
| Nudcd1      | 6370.40024 | -0.3578912 | 0.2006041  | -1.7840671 | 0.07441276 | 0.27887373 |
| Cdyl        | 4288.56383 | -0.3579126 | 0.24911732 | -1.4367232 | 0.15079665 | 0.41763825 |
| Ano9        | 3658.52044 | -0.357973  | 0.2513011  | -1.4244786 | 0.15430798 | 0.42262123 |
| Gpr137b     | 859.996731 | -0.3581338 | 0.25958635 | -1.3796328 | 0.16769974 | 0.44260371 |
| Zmym2       | 8328.00717 | -0.3582975 | 0.19102796 | -1.8756285 | 0.06070631 | 0.2479758  |
| Gnl3l       | 11388.5857 | -0.3587752 | 0.17793513 | -2.0163259 | 0.04376591 | 0.20199689 |
| Triml1      | 3734.89099 | -0.3589017 | 0.43225555 | -0.8302998 | NA         | NA         |
| Tcf15       | 246.84574  | -0.3589649 | 0.31966859 | -1.1229282 | 0.26146798 | 0.55368559 |
| Ovol1       | 6.30027986 | -0.3589934 | 0.40892441 | -0.8778968 | 0.37999974 | 0.66893546 |
| Lifr        | 3944.07035 | -0.3590014 | 0.24994493 | -1.4363218 | 0.15091078 | 0.41773167 |
| Rps7        | 43210.0651 | -0.359037  | 0.19439417 | -1.8469537 | 0.06475385 | 0.25783728 |
| Efcab14     | 2581.3162  | -0.3591013 | 0.18823084 | -1.9077707 | 0.05642086 | 0.23662822 |
| Gnpat       | 9019.35582 | -0.3592561 | 0.17366735 | -2.068645  | 0.03857941 | 0.18760113 |
| Bpnt1       | 7473.01417 | -0.3593253 | 0.25281198 | -1.4213142 | 0.15522542 | 0.4237087  |
| Ankrd13b    | 430.819714 | -0.359343  | 0.23692804 | -1.5166756 | 0.12934861 | 0.38455938 |
| Cd81        | 18688.212  | -0.3593685 | 0.16963911 | -2.1184294 | 0.03413872 | 0.17343717 |
| Lpar1       | 5256.45956 | -0.3594615 | 0.19675879 | -1.8269145 | 0.06771262 | 0.26417435 |
| Hmbs        | 4927.50342 | -0.3595454 | 0.2007202  | -1.7912765 | 0.07324894 | 0.27621102 |
| Tet1        | 18226.092  | -0.3596022 | 0.24692337 | -1.4563314 | 0.14530104 | 0.40852947 |
| Gsg1l       | 5.25484389 | -0.359662  | 0.39385182 | -0.9131912 | 0.361142   | NA         |
| Nudt2       | 1477.26079 | -0.3597804 | 0.20883686 | -1.722782  | 0.08492796 | 0.30220122 |
| Gm4961      | 297.374134 | -0.3599379 | 0.25880691 | -1.3907585 | 0.16429866 | 0.43721913 |
| Thumpd3     | 7632.42295 | -0.3600209 | 0.15140201 | -2.3779134 | 0.01741092 | 0.11253414 |
| Nmt1        | 12733.3937 | -0.360099  | 0.22177703 | -1.6236986 | 0.10444015 | 0.3398475  |
| P2rx7       | 632.804995 | -0.3601501 | 0.22097468 | -1.6298254 | 0.1031384  | 0.33766428 |
| Trim56      | 179.303296 | -0.3602277 | 0.33941656 | -1.0613144 | 0.28854702 | 0.5820921  |
| Tet3        | 808.766127 | -0.3603613 | 0.28823902 | -1.2502171 | 0.21122026 | 0.4978306  |
| E130309F12F | 4.03373858 | -0.3604153 | 0.34183583 | -1.0543521 | 0.29172176 | NA         |
| Pik3cb      | 2832.91355 | -0.3604241 | 0.20710099 | -1.74033   | 0.08180109 | 0.29577705 |
| Sepsecs     | 562.599943 | -0.3605056 | 0.2241104  | -1.6086073 | 0.10770225 | 0.34655031 |
| Celsr3      | 509.975752 | -0.3605298 | 0.35640611 | -1.0115703 | 0.31174357 | 0.60634544 |
| Sgsm1       | 1430.76875 | -0.3605348 | 0.19698173 | -1.8302957 | 0.06720574 | 0.2633085  |
| Pcf11       | 8368.58186 | -0.3606848 | 0.16790707 | -2.1481218 | 0.03170408 | 0.16561307 |
| 2410002F23F | 5861.00229 | -0.3607056 | 0.1650554  | -2.1853609 | 0.02886239 | 0.15582582 |
| Ankrd40     | 3563.9305  | -0.3608019 | 0.16759782 | -2.1527837 | 0.03133568 | 0.16418502 |
| Ireb2       | 18457.1716 | -0.3608661 | 0.20206206 | -1.7859172 | 0.07411267 | 0.27818637 |
| Mpp6        | 7328.89605 | -0.3608982 | 0.17615112 | -2.0487985 | 0.04048182 | 0.19271892 |
| Lsm4        | 6943.62638 | -0.360979  | 0.23700407 | -1.5230919 | 0.1277357  | 0.38170982 |

|            |            |            |            |            |            |            |
|------------|------------|------------|------------|------------|------------|------------|
| Tbce       | 2730.25957 | -0.361189  | 0.17823797 | -2.0264426 | 0.04271944 | 0.1991746  |
| Kmt2e      | 2167.92928 | -0.3611891 | 0.23621624 | -1.5290613 | 0.12624924 | 0.3792699  |
| Nsd1       | 20733.745  | -0.3612077 | 0.21504805 | -1.6796603 | 0.09302342 | 0.31749931 |
| Ror1       | 23.096367  | -0.3612789 | 0.41989496 | -0.860403  | 0.38956693 | 0.67794934 |
| Bola3      | 1176.41521 | -0.3613245 | 0.19650284 | -1.838775  | 0.06594828 | 0.26019024 |
| Fnta       | 8009.46998 | -0.3613648 | 0.24616269 | -1.4679916 | 0.14210651 | 0.40296716 |
| Gppbp1l1   | 8654.55742 | -0.3615162 | 0.15751991 | -2.2950509 | 0.02173021 | 0.13047353 |
| Prickle1   | 408.217626 | -0.3615197 | 0.34347823 | -1.0525259 | 0.29255832 | 0.58640437 |
| Sft2d3     | 289.231752 | -0.3615663 | 0.25379451 | -1.4246419 | 0.15426073 | 0.42256626 |
| Rpl7a      | 70828.8224 | -0.3615759 | 0.17466412 | -2.070121  | 0.03844101 | 0.18720125 |
| Usp45      | 4752.90164 | -0.3616263 | 0.20895748 | -1.7306215 | 0.08351929 | 0.29919569 |
| Fam83d     | 2364.53026 | -0.3617876 | 0.21701708 | -1.6670927 | 0.09549598 | 0.32290888 |
| Map3k1     | 3012.98889 | -0.3617993 | 0.21396818 | -1.6909023 | 0.09085547 | 0.31378    |
| Arhgap11a  | 5060.35202 | -0.3618476 | 0.23314335 | -1.5520393 | 0.12065282 | 0.36940975 |
| Yeats4     | 4923.32956 | -0.3619815 | 0.15722548 | -2.3023079 | 0.02131781 | 0.12914425 |
| D130017N08 | 18.4051449 | -0.3620823 | 0.43225508 | -0.8376588 | 0.40222235 | 0.68682988 |
| Macf1      | 18944.2904 | -0.3621848 | 0.2842234  | -1.274296  | 0.20255852 | 0.487284   |
| Psip1      | 22478.0604 | -0.3622354 | 0.15924515 | -2.2747027 | 0.02292377 | 0.13503318 |
| Hist1h1a   | 40.0872976 | -0.3624143 | 0.4255446  | -0.8516482 | 0.39440935 | 0.682026   |
| Pamr1      | 29.763339  | -0.3624541 | 0.35838581 | -1.0113516 | 0.31184817 | 0.60634544 |
| Pwp1       | 8534.42451 | -0.3625384 | 0.15359665 | -2.3603272 | 0.01825882 | 0.1163224  |
| Aldh18a1   | 6911.2257  | -0.3625442 | 0.17084135 | -2.1221106 | 0.03382845 | 0.17248075 |
| BC048679   | 26.8421211 | -0.3628762 | 0.42644552 | -0.8509321 | 0.39480705 | 0.68226374 |
| Tmco6      | 1151.6381  | -0.3628929 | 0.29269463 | -1.2398346 | 0.21503656 | 0.50233341 |
| Tnfrsf19   | 2992.06529 | -0.3630416 | 0.27083751 | -1.3404407 | 0.18010211 | 0.4586911  |
| Armxc2     | 1048.73564 | -0.3631035 | 0.24591687 | -1.4765294 | 0.13980182 | 0.39971171 |
| Rfc1       | 15161.5363 | -0.3633295 | 0.16808828 | -2.1615396 | 0.03065368 | 0.16170129 |
| Chst1      | 3.47869575 | -0.36333   | 0.31416829 | -1.1564821 | 0.24748401 | NA         |
| Gtpbp3     | 1837.87455 | -0.3633869 | 0.19507155 | -1.8628389 | 0.06248494 | 0.25214118 |
| Il23a      | 168.219226 | -0.3634704 | 0.34546736 | -1.0521121 | 0.29274814 | 0.58651459 |
| Tnrc6c     | 4075.50074 | -0.3634899 | 0.2300908  | -1.5797672 | 0.11416018 | 0.35801802 |
| Rapgef6    | 3792.36748 | -0.3635567 | 0.24721317 | -1.4706203 | 0.14139382 | 0.40183728 |
| Ilf3       | 19637.7599 | -0.3636174 | 0.1704686  | -2.1330464 | 0.03292092 | 0.16940874 |
| Spcs3      | 12483.2835 | -0.3637387 | 0.21010143 | -1.7312526 | 0.08340672 | 0.29913696 |
| Rnpepl1    | 1143.06825 | -0.3637737 | 0.18606132 | -1.9551278 | 0.05056799 | 0.22108034 |
| Canx       | 70515.5214 | -0.3638621 | 0.160367   | -2.2689336 | 0.02327237 | 0.13631207 |
| Zfp97      | 1137.28694 | -0.3639036 | 0.19444858 | -1.8714647 | 0.0612807  | 0.24933966 |
| Nxph3      | 204.506021 | -0.3640088 | 0.31275601 | -1.1638747 | 0.24447477 | 0.53699054 |
| Fam195b    | 1287.35986 | -0.3641428 | 0.22191142 | -1.6409377 | 0.10081036 | 0.33279315 |
| Stom       | 821.94968  | -0.3642501 | 0.32566154 | -1.1184928 | 0.26335656 | 0.55541671 |
| Eea1       | 2364.86821 | -0.364323  | 0.22795597 | -1.5982164 | 0.10999482 | 0.35044651 |

|             |            |            |            |            |            |            |
|-------------|------------|------------|------------|------------|------------|------------|
| Dcps        | 4116.59356 | -0.3643832 | 0.23374875 | -1.5588668 | 0.11902791 | 0.36689611 |
| Psme3       | 14634.6572 | -0.3645455 | 0.17498442 | -2.0833025 | 0.03722366 | 0.18289576 |
| Klhl11      | 1122.85803 | -0.364578  | 0.28028596 | -1.3007359 | 0.19334888 | 0.47605581 |
| Adh5        | 19915.5799 | -0.3648262 | 0.18307061 | -1.9928167 | 0.04628153 | 0.20910052 |
| Mpl         | 4.01248577 | -0.3649644 | 0.32844181 | -1.1111996 | 0.26648246 | NA         |
| Plekhm3     | 1782.87756 | -0.3650792 | 0.22812183 | -1.6003694 | 0.10951665 | 0.34969305 |
| Ccdc55      | 4264.96052 | -0.3651932 | 0.21613574 | -1.6896475 | 0.0910954  | 0.31424681 |
| Snord104    | 222.584887 | -0.3652384 | 0.27090779 | -1.348202  | 0.17759343 | 0.45508222 |
| Bin3        | 902.764211 | -0.365273  | 0.22609744 | -1.6155556 | 0.10619043 | 0.34339101 |
| Gltpd2      | 15.7421352 | -0.3654612 | 0.4261299  | -0.8576286 | 0.39109756 | 0.67916942 |
| Fam84b      | 427.755478 | -0.3655196 | 0.28974741 | -1.2615111 | 0.20712477 | 0.49250722 |
| Trdmt1      | 792.494058 | -0.3656082 | 0.18293715 | -1.9985456 | 0.04565754 | 0.20760832 |
| Gfpt2       | 3601.78031 | -0.3656595 | 0.28470589 | -1.2843411 | 0.19902264 | 0.48231277 |
| Zfx         | 3517.85569 | -0.365795  | 0.21760451 | -1.6810082 | 0.09276132 | 0.31711237 |
| Arid2       | 4820.1094  | -0.3659887 | 0.2111362  | -1.7334245 | 0.08302025 | 0.29854836 |
| Fbxl13      | 4.88401106 | -0.3661532 | 0.39197269 | -0.9341293 | 0.35023718 | NA         |
| Rpl27a      | 32011.2541 | -0.3662452 | 0.19848715 | -1.8451833 | 0.06501088 | 0.25826729 |
| Ywhae       | 84790.4502 | -0.3662929 | 0.16149056 | -2.2682001 | 0.02331701 | 0.13636812 |
| Gm5523      | 106.424397 | -0.3663248 | 0.3018378  | -1.2136479 | 0.22488221 | 0.51436142 |
| Zranb2      | 16698.5455 | -0.3664995 | 0.18254654 | -2.0077047 | 0.04467468 | 0.20475567 |
| Gnb1l       | 869.102528 | -0.3665039 | 0.19650199 | -1.8651409 | 0.06216165 | 0.25121514 |
| Gpa33       | 5661.80485 | -0.3665982 | 0.17101697 | -2.1436364 | 0.03206203 | 0.16647633 |
| Tnfrsf1a    | 760.939755 | -0.3666425 | 0.21147418 | -1.7337461 | 0.08296315 | 0.29844087 |
| Gdf15       | 534.192699 | -0.3666891 | 0.2177963  | -1.6836331 | 0.09225261 | 0.31634405 |
| Sbf1        | 4324.38418 | -0.3668288 | 0.21126121 | -1.7363758 | 0.08249741 | 0.2973157  |
| Sbno1       | 16925.6924 | -0.3668685 | 0.19540155 | -1.8775109 | 0.0604481  | 0.2473759  |
| Mat2b       | 7678.2775  | -0.366936  | 0.16170625 | -2.2691518 | 0.0232591  | 0.1362857  |
| Sln9        | 2339.04621 | -0.3671303 | 0.33749396 | -1.0878128 | 0.27667774 | 0.56928593 |
| Fam58b      | 1092.68771 | -0.3671702 | 0.20988512 | -1.7493863 | 0.08022427 | 0.29210199 |
| Sdr39u1     | 525.397706 | -0.3673199 | 0.27894358 | -1.316825  | 0.18789728 | 0.46932702 |
| Ppapdc2     | 342.062345 | -0.3674334 | 0.2540248  | -1.446447  | 0.14805186 | 0.41292308 |
| Odf2        | 20450.975  | -0.3678117 | 0.18895395 | -1.946568  | 0.05158655 | 0.22364716 |
| Emc2        | 6068.43612 | -0.3678546 | 0.22900828 | -1.6062939 | 0.10820934 | 0.3475348  |
| Trip10      | 3576.75847 | -0.3679704 | 0.20565352 | -1.7892736 | 0.07357076 | 0.27714546 |
| Zfp821      | 585.913136 | -0.3680368 | 0.24338881 | -1.5121354 | 0.13049941 | 0.38645621 |
| D5Erttd579e | 2968.63082 | -0.3681177 | 0.18546987 | -1.9847843 | 0.04716847 | 0.21144909 |
| 2810408I11R | 479.448922 | -0.3681878 | 0.22212733 | -1.657553  | 0.09740772 | 0.32618162 |
| Ephb3       | 1781.62404 | -0.36822   | 0.24157865 | -1.5242242 | 0.12745272 | 0.38145058 |
| Ifnlr1      | 764.434845 | -0.368315  | 0.27168126 | -1.3556881 | 0.17519844 | 0.45309298 |
| Syk         | 2867.42281 | -0.3683414 | 0.16105753 | -2.2870176 | 0.0221948  | 0.1320934  |
| Zfp42       | 14411.5363 | -0.3683601 | 0.43226726 | -0.8521583 | 0.39412622 | 0.681688   |

|             |            |            |            |            |            |            |
|-------------|------------|------------|------------|------------|------------|------------|
| Pprc1       | 14633.7626 | -0.3684255 | 0.22976576 | -1.6034831 | 0.10882804 | 0.34865779 |
| Hfe2        | 20.2704377 | -0.3684372 | 0.43078909 | -0.8552613 | 0.39240651 | 0.68030252 |
| Anapc1      | 10362.6922 | -0.3684386 | 0.23497193 | -1.5680112 | 0.11687853 | 0.36300738 |
| Dynlt3      | 1947.47653 | -0.3685537 | 0.30419095 | -1.2115867 | 0.22567062 | 0.51533095 |
| Anapc5      | 26126.2215 | -0.3686036 | 0.17205445 | -2.1423662 | 0.03216403 | 0.16689449 |
| Snord38a    | 10.4954742 | -0.3688694 | 0.42913767 | -0.8595596 | 0.39003187 | 0.67839532 |
| Tmem168     | 3253.10235 | -0.369078  | 0.16852151 | -2.1900942 | 0.02851741 | 0.15484434 |
| 4833417C18f | 187.909844 | -0.3691574 | 0.29120028 | -1.2677095 | 0.2049017  | 0.49027741 |
| Zfp866      | 2067.44673 | -0.3691603 | 0.23122458 | -1.5965442 | 0.11036735 | 0.35105463 |
| Tead4       | 3418.88848 | -0.3692394 | 0.20779524 | -1.7769387 | 0.07557832 | 0.28131126 |
| Ankzf1      | 1888.53057 | -0.3692432 | 0.23519336 | -1.569956  | 0.11642535 | 0.36239604 |
| Cdc42ep2    | 127.70044  | -0.3694151 | 0.35472369 | -1.0414164 | 0.29768233 | 0.59197672 |
| Rock2       | 7294.56536 | -0.3696066 | 0.22185488 | -1.6659838 | 0.09571663 | 0.32323331 |
| 2610507I01R | 95.6937997 | -0.3697166 | 0.37929166 | -0.9747553 | NA         | NA         |
| ler5        | 522.849269 | -0.3697365 | 0.28680901 | -1.2891382 | 0.19735003 | 0.48043055 |
| Gm3336      | 120.42238  | -0.3697535 | 0.27185799 | -1.3600981 | 0.17379887 | 0.45100512 |
| Eif2s3x     | 4772.83557 | -0.3699717 | 0.19227717 | -1.9241582 | 0.05433475 | 0.23090918 |
| Mybbp1a     | 46593.8171 | -0.370201  | 0.23817516 | -1.5543223 | 0.12010756 | 0.36891028 |
| Sf3b6       | 5310.16411 | -0.370207  | 0.17926307 | -2.0651602 | 0.03890784 | 0.18833006 |
| Lrrc36      | 5.4960533  | -0.3702827 | 0.38646538 | -0.9581266 | 0.33799894 | NA         |
| Morn4       | 819.071304 | -0.3704165 | 0.21385648 | -1.7320801 | 0.0832593  | 0.298953   |
| Dmxl1       | 8035.03529 | -0.3705162 | 0.25150267 | -1.4732097 | 0.14069451 | 0.40101546 |
| Rarg        | 3024.54059 | -0.3705434 | 0.34540687 | -1.0727736 | 0.28337272 | 0.57580419 |
| Pycr2       | 4238.38688 | -0.3706397 | 0.24782047 | -1.4955975 | 0.13475858 | 0.39236673 |
| Rab28       | 1793.56225 | -0.3707071 | 0.16497289 | -2.2470791 | 0.02463497 | 0.14132374 |
| Bptf        | 13003.3921 | -0.3707669 | 0.27938194 | -1.327097  | 0.1844766  | 0.46450707 |
| Syt14       | 247.226077 | -0.3708672 | 0.28805801 | -1.2874741 | 0.19792908 | 0.48094783 |
| Gna11       | 4582.19643 | -0.3711444 | 0.19148046 | -1.9382886 | 0.05258802 | 0.22676332 |
| Ddx50       | 7196.73878 | -0.3711831 | 0.16099871 | -2.3055033 | 0.0211384  | 0.12859479 |
| Rhbdf2      | 2587.8727  | -0.3712723 | 0.25142941 | -1.4766463 | 0.13977047 | 0.39970037 |
| Vwf         | 1642.33657 | -0.3713303 | 0.2168403  | -1.7124597 | 0.08681199 | 0.30640337 |
| Figl1       | 13202.8434 | -0.3714409 | 0.15807446 | -2.3497845 | 0.01878428 | 0.11844095 |
| Dst         | 20090.3845 | -0.3715059 | 0.34389295 | -1.0802951 | 0.2800108  | 0.5723512  |
| Epcam       | 3762.6075  | -0.371579  | 0.28221465 | -1.3166539 | 0.18795466 | 0.46937977 |
| Gm711       | 6.95352173 | -0.3716272 | 0.42137674 | -0.8819358 | 0.37781154 | 0.6675014  |
| Rslan18     | 185.365885 | -0.3716367 | 0.27989373 | -1.3277777 | 0.18425155 | 0.4644599  |
| Zfp688      | 586.124794 | -0.3716569 | 0.22618159 | -1.6431794 | 0.10034582 | 0.33187534 |
| Usp35       | 341.136883 | -0.3717128 | 0.2584069  | -1.4384787 | 0.15029828 | 0.41655473 |
| Mta1        | 5702.85039 | -0.3718095 | 0.19716455 | -1.8857825 | 0.05932427 | 0.24431984 |
| Unc50       | 2042.30842 | -0.3718338 | 0.16733415 | -2.2221034 | 0.02627632 | 0.14661752 |
| Nae1        | 7919.15479 | -0.3718698 | 0.21890451 | -1.6987763 | 0.08936134 | 0.31116396 |

|             |            |            |            |            |            |            |
|-------------|------------|------------|------------|------------|------------|------------|
| Tfcp2       | 1302.21326 | -0.372038  | 0.20582949 | -1.807506  | 0.07068342 | 0.27052496 |
| Ing1        | 4507.48515 | -0.3721842 | 0.19321628 | -1.9262567 | 0.05407233 | 0.2304409  |
| Mplkip      | 1213.98649 | -0.3721966 | 0.19307451 | -1.9277354 | 0.05388804 | 0.23016012 |
| Ik          | 11331.5414 | -0.3722036 | 0.1522343  | -2.4449392 | 0.01448766 | 0.09929377 |
| Cep350      | 1891.54492 | -0.3722301 | 0.27273204 | -1.3648198 | 0.1723097  | 0.44929378 |
| 2900041M22  | 184.225537 | -0.372286  | 0.31672685 | -1.1754166 | 0.2398281  | 0.53178192 |
| Ralgapa2    | 2206.56759 | -0.3726398 | 0.19530367 | -1.908002  | 0.05639096 | 0.23662597 |
| Pum2        | 15722.5941 | -0.3726529 | 0.18105096 | -2.0582763 | 0.03956362 | 0.18991988 |
| Fastk       | 4436.96293 | -0.3729693 | 0.20552299 | -1.8147329 | 0.06956497 | 0.26843792 |
| Zfp54       | 285.809102 | -0.3729868 | 0.21272311 | -1.7533912 | 0.07953488 | 0.2910228  |
| Etv2        | 69.5780532 | -0.3729997 | 0.37120933 | -1.0048231 | 0.31498206 | 0.6093449  |
| Zfand1      | 1873.37832 | -0.3730967 | 0.21584676 | -1.7285257 | 0.08389403 | 0.29991632 |
| AW146154    | 506.707991 | -0.3734767 | 0.21936788 | -1.7025133 | 0.08865919 | 0.30995588 |
| St3gal3     | 1533.8672  | -0.3734907 | 0.26394131 | -1.4150522 | 0.1570532  | 0.42653412 |
| Ccdc58      | 5331.28678 | -0.3734926 | 0.19873062 | -1.8793911 | 0.06019111 | 0.2467788  |
| Gm16712     | 18.514329  | -0.3736794 | 0.41924597 | -0.891313  | 0.3727613  | 0.66269681 |
| Kat5        | 2759.09397 | -0.3737961 | 0.17427644 | -2.1448461 | 0.03196516 | 0.16636216 |
| Ubr5        | 41229.9495 | -0.3740157 | 0.22100877 | -1.6923114 | 0.09058661 | 0.31332569 |
| Mum1        | 6056.77374 | -0.3741134 | 0.17121496 | -2.1850506 | 0.02888514 | 0.15582582 |
| Ino80       | 5157.62541 | -0.3744136 | 0.23373539 | -1.6018694 | 0.10918449 | 0.34910823 |
| Haus3       | 4106.58495 | -0.3744869 | 0.17833203 | -2.0999419 | 0.03573395 | 0.17908433 |
| Riok1       | 2966.15251 | -0.3745615 | 0.18815782 | -1.9906772 | 0.04651639 | 0.2098568  |
| Nol8        | 6788.51797 | -0.3745694 | 0.17914559 | -2.0908658 | 0.03654009 | 0.18129403 |
| Hbq1b       | 3.92460237 | -0.3745815 | 0.38424963 | -0.974839  | 0.32964012 | NA         |
| Tnpo3       | 16825.9049 | -0.374649  | 0.17166604 | -2.1824291 | 0.02907788 | 0.15634584 |
| lfit1       | 5.70016898 | -0.3748983 | 0.37270248 | -1.0058915 | 0.31446778 | NA         |
| Snord85     | 3.46363262 | -0.3750413 | 0.38037918 | -0.985967  | 0.3241493  | NA         |
| Glyctk      | 369.018993 | -0.3750796 | 0.23192116 | -1.617272  | 0.10581959 | 0.34251753 |
| 2010010A06f | 15.6128205 | -0.375081  | 0.43081175 | -0.8706377 | 0.383952   | 0.67307378 |
| Plin4       | 7.11262782 | -0.3750914 | 0.42598366 | -0.8805299 | 0.37857229 | 0.66771292 |
| Cox10       | 1776.75124 | -0.3751678 | 0.23728761 | -1.581068  | 0.11386249 | 0.35771224 |
| Rpl3        | 98851.549  | -0.375256  | 0.18540722 | -2.0239557 | 0.04297471 | 0.19991016 |
| Palm2       | 50.1145594 | -0.3753876 | 0.37904951 | -0.9903393 | 0.3220083  | 0.61638983 |
| Acly        | 55967.497  | -0.3755728 | 0.17735422 | -2.1176421 | 0.03420539 | 0.17358019 |
| Ggh         | 1026.22997 | -0.37561   | 0.22757366 | -1.6504983 | 0.09884105 | 0.32887155 |
| Mipep       | 2330.10626 | -0.3756717 | 0.21537278 | -1.7442857 | 0.08110929 | 0.29442822 |
| Mir1968     | 11.9794763 | -0.3758692 | 0.42927507 | -0.8755906 | 0.38125266 | 0.67030641 |
| Eral1       | 1973.82245 | -0.3758712 | 0.19710376 | -1.906971  | 0.05652434 | 0.23692994 |
| Tex10       | 11580.4591 | -0.375988  | 0.16657902 | -2.2571152 | 0.02400088 | 0.13875005 |
| Mettl10     | 1292.8678  | -0.3760664 | 0.20336434 | -1.8492248 | 0.06442536 | 0.256892   |
| Atrip       | 1518.02207 | -0.3761681 | 0.16341911 | -2.3018611 | 0.02134301 | 0.12924655 |

|             |            |            |            |            |            |            |
|-------------|------------|------------|------------|------------|------------|------------|
| Ogfod1      | 3793.64266 | -0.3761962 | 0.2230416  | -1.6866636 | 0.09166805 | 0.31531296 |
| Ccdc171     | 377.830549 | -0.3762809 | 0.20136052 | -1.8686923 | 0.06166564 | 0.25012059 |
| Kars        | 22839.0382 | -0.3764473 | 0.22165508 | -1.6983473 | 0.08944224 | 0.31119611 |
| Ptpre       | 12.322433  | -0.3765131 | 0.43202338 | -0.8715108 | 0.3834753  | 0.67248981 |
| Clcn3       | 11023.5424 | -0.3765223 | 0.28047359 | -1.3424519 | 0.17944951 | 0.45762863 |
| Cnot7       | 7542.58287 | -0.3769433 | 0.21790125 | -1.7298814 | 0.08365146 | 0.29953116 |
| Sgca        | 6.24256967 | -0.3770961 | 0.41443087 | -0.9099132 | 0.3628683  | 0.65337545 |
| 0610009O20l | 2973.20213 | -0.3772126 | 0.17102654 | -2.2055794 | 0.02741346 | 0.15079829 |
| Acsf3       | 633.525086 | -0.3773948 | 0.21991338 | -1.7161068 | 0.08614251 | 0.30489812 |
| Tmx3        | 6821.66838 | -0.3774716 | 0.19585014 | -1.9273494 | 0.0539361  | 0.2301623  |
| Cct6a       | 62427.757  | -0.3774972 | 0.16031565 | -2.3547118 | 0.01853708 | 0.11733675 |
| Opa1        | 6299.76474 | -0.3775148 | 0.18170172 | -2.0776623 | 0.03774047 | 0.18485106 |
| Naf1        | 2989.46359 | -0.3775962 | 0.24102102 | -1.5666527 | 0.11719589 | 0.36362993 |
| Hist1h3e    | 7.95999761 | -0.3777202 | 0.4187446  | -0.9020301 | 0.36704089 | 0.65717579 |
| Atp5c1      | 31572.0077 | -0.3778381 | 0.17308807 | -2.1829241 | 0.0290414  | 0.15629656 |
| Gpbar1      | 5.66772786 | -0.3779225 | 0.38903603 | -0.9714331 | 0.33133265 | NA         |
| Zfp296      | 2910.80465 | -0.3783365 | 0.26993658 | -1.4015754 | 0.16104207 | 0.43209007 |
| Usp48       | 24483.5876 | -0.3783376 | 0.1561072  | -2.4235755 | 0.01536856 | 0.10323821 |
| Mgme1       | 3326.87107 | -0.3786865 | 0.15847194 | -2.3896121 | 0.01686617 | 0.10998951 |
| Tnip1       | 5665.69856 | -0.3787358 | 0.29902521 | -1.266568  | 0.20530981 | 0.4903111  |
| Pla2r1      | 35.2533107 | -0.3790156 | 0.40731451 | -0.9305231 | 0.3521003  | 0.64425364 |
| Krr1        | 7729.80067 | -0.3790566 | 0.16437975 | -2.3059813 | 0.02111168 | 0.12859479 |
| Aqr         | 12017.9657 | -0.3791364 | 0.23301192 | -1.6271116 | 0.10371339 | 0.33917927 |
| Dld         | 8508.51884 | -0.3791453 | 0.16352038 | -2.3186426 | 0.02041442 | 0.12559556 |
| Meis1       | 64.0116569 | -0.3792742 | 0.33374458 | -1.1364204 | 0.25578065 | 0.54856501 |
| Ankle1      | 567.074598 | -0.3792873 | 0.23903087 | -1.5867714 | 0.11256444 | 0.35516021 |
| Loxl2       | 173.172539 | -0.3798831 | 0.38413549 | -0.98893   | 0.3226974  | 0.61717713 |
| 4932438A13f | 2976.12865 | -0.3798984 | 0.26760398 | -1.4196292 | 0.15571565 | 0.42438381 |
| Tdp1        | 2715.12451 | -0.3799142 | 0.17048228 | -2.2284674 | 0.02584936 | 0.14538871 |
| Rnf138      | 7877.79974 | -0.3800604 | 0.16918825 | -2.2463757 | 0.02467995 | 0.1415184  |
| 8030462N17l | 3536.98788 | -0.3801825 | 0.21868457 | -1.7384973 | 0.08212322 | 0.29639063 |
| Eps15l1     | 5760.67683 | -0.3801873 | 0.20373815 | -1.8660585 | 0.06203319 | 0.25096937 |
| Irf2        | 42.2544546 | -0.3802104 | 0.42488387 | -0.8948573 | 0.37086339 | 0.66123557 |
| Zcchc24     | 1633.58863 | -0.3804781 | 0.3181058  | -1.196074  | 0.23166768 | 0.52302118 |
| Sox1        | 184.759506 | -0.3805291 | 0.29375578 | -1.2953927 | 0.1951848  | 0.47806832 |
| Tomm70a     | 23602.3444 | -0.3806424 | 0.16858931 | -2.2578087 | 0.02395759 | 0.13873104 |
| Zfp551      | 245.982077 | -0.3806802 | 0.26311898 | -1.4467987 | 0.14795331 | 0.41286456 |
| Slco5a1     | 401.760203 | -0.3806814 | 0.23072574 | -1.6499305 | 0.09895714 | 0.32903197 |
| Kcng1       | 51.5823813 | -0.380826  | 0.43226153 | -0.8810082 | 0.37831337 | 0.66771292 |
| H60b        | 20.8604936 | -0.3808447 | 0.41429042 | -0.9192699 | 0.3579544  | 0.64918023 |
| Cela2a      | 248.820433 | -0.3809142 | 0.34917482 | -1.0908982 | 0.27531766 | 0.56762479 |

|             |            |            |            |            |            |            |
|-------------|------------|------------|------------|------------|------------|------------|
| 1500011K16F | 886.04665  | -0.3809242 | 0.24268819 | -1.5696033 | 0.11650743 | 0.3624409  |
| Map10       | 1170.09439 | -0.3810383 | 0.22121576 | -1.7224737 | 0.08498374 | 0.30227639 |
| Txnrd1      | 23175.5144 | -0.3811718 | 0.25449651 | -1.4977488 | 0.13419853 | 0.39146902 |
| Glul        | 4953.67308 | -0.3813969 | 0.19945594 | -1.9121861 | 0.05585233 | 0.23532473 |
| Enkur       | 3.96065978 | -0.3814234 | 0.3515675  | -1.0849222 | 0.2779561  | NA         |
| Rictor      | 3257.36229 | -0.3814587 | 0.26615801 | -1.4332039 | 0.15179957 | 0.418749   |
| Khdc1a      | 72.5957335 | -0.3814641 | 0.42776352 | -0.8917641 | 0.37251941 | 0.66269681 |
| Atxn1l      | 1210.43624 | -0.381478  | 0.25717864 | -1.4833191 | 0.13798965 | 0.3969436  |
| Trim45      | 358.073543 | -0.3815206 | 0.27959118 | -1.3645659 | 0.17238952 | 0.44942656 |
| Ptbp3       | 15488.8438 | -0.3816585 | 0.19876518 | -1.9201478 | 0.05483924 | 0.23230863 |
| Snord49a    | 228.626107 | -0.3817286 | 0.25818947 | -1.4784826 | 0.13927864 | 0.39902765 |
| D7Erttd715e | 3005.56146 | -0.3817535 | 0.21827136 | -1.7489857 | 0.0802935  | 0.29214885 |
| Tecta       | 15.3230199 | -0.3819127 | 0.42835684 | -0.891576  | 0.37262024 | 0.66269681 |
| Fam73a      | 5261.23554 | -0.3819146 | 0.22013812 | -1.7348864 | 0.08276093 | 0.29798916 |
| Slc6a9      | 531.539224 | -0.3819304 | 0.24187816 | -1.5790198 | 0.11433151 | 0.35824487 |
| Zfp873      | 782.841274 | -0.3819527 | 0.19354059 | -1.9735017 | 0.04843844 | 0.21546514 |
| Zfp317      | 4055.79405 | -0.3819583 | 0.18034225 | -2.1179638 | 0.03417813 | 0.17358019 |
| 6330419J24R | 347.240113 | -0.3819761 | 0.20166806 | -1.8940831 | 0.05821398 | 0.24108803 |
| Gabarapl1   | 2071.44805 | -0.3820084 | 0.27320561 | -1.398245  | 0.16203949 | 0.43326619 |
| Tmem63a     | 859.822084 | -0.3825408 | 0.3164452  | -1.208869  | 0.22671316 | 0.51695254 |
| Gm6498      | 11.0736824 | -0.3826624 | 0.43195184 | -0.8858912 | 0.37567614 | 0.6654252  |
| Zfp445      | 8175.42632 | -0.3830293 | 0.18249524 | -2.0988455 | 0.03583052 | 0.17945264 |
| Frs2        | 2779.72397 | -0.3830439 | 0.25731062 | -1.488644  | 0.13658114 | 0.39481981 |
| Suz12       | 37542.4792 | -0.3832072 | 0.19532036 | -1.9619418 | 0.04976926 | 0.21905936 |
| Dtwd2       | 1514.68183 | -0.3832077 | 0.16446323 | -2.3300508 | 0.01980347 | 0.12298871 |
| Nfic        | 1205.605   | -0.3833121 | 0.23778988 | -1.6119782 | 0.10696669 | 0.34516082 |
| Abce1       | 39537.846  | -0.3833229 | 0.2312144  | -1.6578679 | 0.09734413 | 0.3260389  |
| 9030624G23I | 728.140249 | -0.3837317 | 0.22311847 | -1.7198565 | 0.08545853 | 0.30334471 |
| Eno2        | 370.39148  | -0.3839625 | 0.3239059  | -1.1854136 | 0.23585395 | 0.52766001 |
| Dpp3        | 10064.2285 | -0.3839849 | 0.17199415 | -2.2325461 | 0.02557889 | 0.14454118 |
| Coq2        | 1646.96156 | -0.3842258 | 0.2072217  | -1.8541772 | 0.06371381 | 0.25529851 |
| Wdr82       | 16906.4507 | -0.3842265 | 0.15683187 | -2.4499263 | 0.01428854 | 0.0983191  |
| Hand1       | 14.8989869 | -0.3843836 | 0.43227099 | -0.8892191 | 0.37388532 | 0.66350457 |
| Hist1h3i    | 2.38244019 | -0.3847412 | 0.34948328 | -1.1008858 | 0.27094638 | NA         |
| Fam160a1    | 93.764213  | -0.3847614 | 0.32410046 | -1.1871671 | 0.2351617  | 0.52698982 |
| Caly        | 23.2330334 | -0.3850044 | 0.42523255 | -0.9053973 | 0.36525495 | 0.65529301 |
| Cdc40       | 4716.30411 | -0.3850242 | 0.16397942 | -2.3480029 | 0.01887438 | 0.11888029 |
| Cradd       | 766.201677 | -0.3853337 | 0.31888567 | -1.2083757 | 0.22690277 | 0.51708161 |
| Magea8      | 83.9675154 | -0.3854323 | 0.29415326 | -1.3103112 | 0.19009059 | 0.47176806 |
| Myom2       | 432.137091 | -0.3854929 | 0.41133005 | -0.9371863 | 0.34866272 | 0.64088124 |
| Oas3        | 194.85224  | -0.3855021 | 0.34139444 | -1.1291986 | 0.25881407 | 0.55112352 |



|            |            |            |            |            |            |            |
|------------|------------|------------|------------|------------|------------|------------|
| Zfp1       | 1540.25794 | -0.385635  | 0.31794042 | -1.2129159 | 0.22516196 | 0.51458839 |
| Rps14      | 55325.7267 | -0.3857397 | 0.22882731 | -1.6857239 | 0.09184899 | 0.3154469  |
| Wwc1       | 3199.38866 | -0.3857915 | 0.22015866 | -1.7523339 | 0.0797164  | 0.29132599 |
| Gck        | 73.3085939 | -0.3859021 | 0.41951957 | -0.9198667 | 0.35764244 | 0.64882146 |
| Pgm5       | 7.24238356 | -0.3859709 | 0.37110466 | -1.0400595 | 0.29831227 | 0.59285036 |
| Cdk1       | 17047.4264 | -0.3860955 | 0.20318423 | -1.900224  | 0.05740373 | 0.23881336 |
| Phf20      | 11661.6768 | -0.3861225 | 0.16018497 | -2.4104787 | 0.0159316  | 0.10575075 |
| Vps13d     | 3954.64089 | -0.3861388 | 0.20380084 | -1.894687  | 0.05813388 | 0.24101305 |
| Axin2      | 1985.581   | -0.3862399 | 0.37167334 | -1.0391919 | 0.29871548 | 0.59342417 |
| Fcho2      | 4656.14872 | -0.3862601 | 0.20723177 | -1.8639041 | 0.06233517 | 0.25178552 |
| Rundc3b    | 646.214712 | -0.3863227 | 0.22996122 | -1.6799472 | 0.09296759 | 0.31739604 |
| Kmt2d      | 5598.7432  | -0.3863404 | 0.28117803 | -1.3740063 | 0.16943974 | 0.44456849 |
| Lmna       | 1893.28012 | -0.3864174 | 0.27259695 | -1.4175411 | 0.1563248  | 0.42521829 |
| Smo        | 1175.63389 | -0.3865837 | 0.25857885 | -1.495032  | 0.13490608 | 0.39242882 |
| Rfx4       | 31.9072702 | -0.3868725 | 0.39322121 | -0.9838547 | 0.32518695 | 0.6188465  |
| Zfyve21    | 2255.1951  | -0.3869378 | 0.2148289  | -1.801144  | 0.07168019 | 0.27267578 |
| Carkd      | 1264.21568 | -0.3872366 | 0.24051886 | -1.6100051 | 0.10739675 | 0.34592519 |
| Pias4      | 2658.19776 | -0.3872577 | 0.19355217 | -2.0007925 | 0.04541476 | 0.20680672 |
| Mrpl19     | 4068.26654 | -0.3873348 | 0.17252207 | -2.2451322 | 0.02475965 | 0.1416891  |
| Slc7a11    | 51.8371538 | -0.3873719 | 0.41069933 | -0.9432006 | 0.3455783  | 0.63779826 |
| Gipr       | 49.5083355 | -0.3877531 | 0.35791846 | -1.0833561 | 0.27865039 | 0.57092124 |
| Tmem221    | 21.5779967 | -0.3879448 | 0.431946   | -0.8981327 | 0.3691148  | 0.65949566 |
| Gucy1a2    | 306.047747 | -0.3880598 | 0.30654922 | -1.2658973 | 0.20554985 | 0.4904873  |
| Cdkn2aipnl | 6505.73851 | -0.3880672 | 0.20986785 | -1.8491027 | 0.06444299 | 0.25689641 |
| Gm14326    | 646.688872 | -0.3881905 | 0.2034133  | -1.9083832 | 0.05634171 | 0.23654696 |
| Pvrl3      | 3183.52852 | -0.3882366 | 0.1980446  | -1.9603496 | 0.04995494 | 0.21956082 |
| Gm9899     | 3.73113054 | -0.3882896 | 0.38032711 | -1.0209358 | 0.30728487 | NA         |
| Fbxw17     | 380.500898 | -0.3883311 | 0.23389408 | -1.6602862 | 0.09685689 | 0.32510718 |
| Vps35      | 29185.836  | -0.3883695 | 0.19186538 | -2.0241773 | 0.04295191 | 0.19986389 |
| Fxyd1      | 2.02969318 | -0.3889913 | 0.30435262 | -1.278094  | 0.20121629 | NA         |
| Pou2f1     | 4464.74329 | -0.3890193 | 0.27938168 | -1.3924296 | 0.16379235 | 0.43630265 |
| Aip        | 1988.64555 | -0.3890333 | 0.19217586 | -2.0243609 | 0.04293304 | 0.19986389 |
| Fxyd5      | 200.454842 | -0.3892694 | 0.38963441 | -0.9990632 | 0.31776408 | 0.61159656 |
| Bub3       | 8868.47691 | -0.3894017 | 0.17106465 | -2.2763425 | 0.02282552 | 0.13491433 |
| Snrnp200   | 29332.9104 | -0.389473  | 0.22653598 | -1.7192544 | 0.08556806 | 0.30351181 |
| Zfp68      | 1783.93733 | -0.3894739 | 0.15996359 | -2.4347657 | 0.01490144 | 0.10106267 |
| Ube2v2     | 1504.3662  | -0.3897256 | 0.20713525 | -1.8815028 | 0.05990356 | 0.24598896 |
| Vmac       | 1277.53125 | -0.3899053 | 0.19312826 | -2.0188932 | 0.04349833 | 0.2012024  |
| Ubxn10     | 322.056199 | -0.3900283 | 0.24353741 | -1.6015127 | 0.10926341 | 0.34926109 |
| Ptk7       | 8168.70006 | -0.3900744 | 0.23526528 | -1.6580195 | 0.09731353 | 0.32600663 |
| Far1       | 9687.42018 | -0.390193  | 0.16628514 | -2.3465296 | 0.01894916 | 0.11916009 |

|             |            |            |            |            |            |            |
|-------------|------------|------------|------------|------------|------------|------------|
| Rufy2       | 3535.08982 | -0.3904354 | 0.17740512 | -2.2008122 | 0.02774932 | 0.15193025 |
| Khdrbs3     | 1751.28968 | -0.3905749 | 0.18728741 | -2.0854308 | 0.03703021 | 0.18252191 |
| Parp16      | 627.621368 | -0.3906551 | 0.20287432 | -1.9256017 | 0.05415413 | 0.23059991 |
| Mgat5       | 773.622128 | -0.3907996 | 0.3619705  | -1.0796449 | 0.28030036 | 0.57238395 |
| Mkx         | 334.429288 | -0.3908579 | 0.22093622 | -1.7690983 | 0.07687748 | 0.28464801 |
| Zfhx3       | 1542.00554 | -0.3910956 | 0.30317738 | -1.2899894 | 0.19705432 | 0.48021826 |
| Prpf4b      | 8770.71229 | -0.3912007 | 0.2206939  | -1.7725943 | 0.07629596 | 0.28337199 |
| Rpl10       | 42905.5849 | -0.3912191 | 0.17391343 | -2.2495046 | 0.02448041 | 0.14073748 |
| Cyth4       | 43.6370954 | -0.3914111 | 0.38828078 | -1.0080619 | 0.31342476 | 0.60787966 |
| Map1s       | 3020.3065  | -0.391543  | 0.27536218 | -1.4219202 | 0.15504943 | 0.4237087  |
| Zeb2        | 14.856525  | -0.3917561 | 0.42827424 | -0.9147319 | 0.3603324  | 0.65127023 |
| Gnpda2      | 1561.1068  | -0.3919212 | 0.24765305 | -1.5825413 | 0.11352605 | 0.35708809 |
| Dph5        | 1614.1208  | -0.3921492 | 0.19175982 | -2.0450019 | 0.04085467 | 0.19369391 |
| Ppfia4      | 2652.30582 | -0.3922782 | 0.2010821  | -1.9508361 | 0.05107654 | 0.2224908  |
| Etv5        | 17398.5037 | -0.3923376 | 0.2099085  | -1.8690886 | 0.0616105  | 0.24999972 |
| Lrfn1       | 634.614558 | -0.3924701 | 0.23187062 | -1.6926256 | 0.09052676 | 0.31332569 |
| Nipsnap1    | 8261.54841 | -0.3926666 | 0.21515035 | -1.8250802 | 0.06798893 | 0.26474569 |
| BC021891    | 21.4472469 | -0.392714  | 0.43227223 | -0.9084876 | 0.36362066 | 0.6537332  |
| Armc10      | 4982.69625 | -0.392738  | 0.16637136 | -2.3606105 | 0.01824488 | 0.11628122 |
| Aarsd1      | 5584.59119 | -0.3927568 | 0.18838677 | -2.0848428 | 0.03708357 | 0.18257395 |
| Txndc16     | 960.458442 | -0.3928092 | 0.27665909 | -1.4198313 | 0.1556568  | 0.42429778 |
| 2310001H17I | 4.99709181 | -0.3928482 | 0.39245889 | -1.0009919 | 0.31683074 | NA         |
| Rnf157      | 433.754672 | -0.3929925 | 0.35094314 | -1.1198182 | 0.26279125 | 0.55510278 |
| 4921524J17R | 1780.35789 | -0.393201  | 0.22439725 | -1.752254  | 0.07973014 | 0.29132599 |
| Arl11       | 134.316678 | -0.3932316 | 0.39265764 | -1.0014617 | 0.31660366 | 0.61108396 |
| Aldh3b1     | 147.037831 | -0.3935334 | 0.36687068 | -1.0726761 | 0.28341647 | 0.57580419 |
| Rasl11b     | 227.048197 | -0.3935888 | 0.2567987  | -1.5326744 | 0.12535609 | 0.37863766 |
| Rnf220      | 7716.76017 | -0.3940299 | 0.17248394 | -2.2844438 | 0.02234546 | 0.13268206 |
| Frem2       | 402.39026  | -0.3942068 | 0.29449057 | -1.338606  | 0.18069897 | 0.4593448  |
| Pla2g2d     | 17.3081196 | -0.3947667 | 0.42844421 | -0.9213958 | 0.35684381 | 0.64797736 |
| Mblac2      | 210.822554 | -0.3948055 | 0.29197469 | -1.3521909 | 0.17631425 | 0.45380054 |
| Ehf         | 41.7725489 | -0.3950482 | 0.40622699 | -0.9724815 | 0.33081104 | 0.62402262 |
| Ldlrad3     | 1121.04572 | -0.3952021 | 0.29761884 | -1.3278801 | 0.18421772 | 0.4644599  |
| Cdca7       | 11351.6748 | -0.3954808 | 0.14652489 | -2.6990689 | 0.00695338 | 0.05974142 |
| Mettl2      | 3512.72465 | -0.3954878 | 0.20476701 | -1.9314038 | 0.05343313 | 0.22909805 |
| Fsd2        | 90.4002176 | -0.3956118 | 0.42274426 | -0.9358183 | 0.34936677 | 0.64174375 |
| Smek2       | 7960.19106 | -0.3956209 | 0.22545019 | -1.754804  | 0.07929285 | 0.29047893 |
| Rad21       | 28337.906  | -0.3956405 | 0.16341658 | -2.4210548 | 0.01547554 | 0.10350975 |
| Gm1045      | 5.6885618  | -0.3956414 | 0.34238106 | -1.1555585 | 0.24786178 | NA         |
| Eif3e       | 26190.1448 | -0.3957152 | 0.17293157 | -2.2882763 | 0.02212143 | 0.13185527 |
| Coasy       | 1925.8978  | -0.3958978 | 0.2326333  | -1.7018105 | 0.08879089 | 0.31002115 |

|             |            |            |            |            |            |            |
|-------------|------------|------------|------------|------------|------------|------------|
| 2-Sep       | 28265.1743 | -0.3960001 | 0.14606585 | -2.7111063 | 0.00670591 | 0.05833265 |
| Mir3061     | 9.76684711 | -0.3960391 | 0.43224588 | -0.9162356 | 0.35954332 | 0.65029754 |
| Zfp558      | 221.206816 | -0.3961542 | 0.29040364 | -1.3641503 | 0.17252027 | 0.44946602 |
| 4930415O20l | 7.28271507 | -0.3962615 | 0.40269051 | -0.9840348 | 0.32509842 | 0.6188465  |
| Bccip       | 8920.92964 | -0.3963432 | 0.15485901 | -2.5593812 | 0.01048587 | 0.07998991 |
| Eif5a2      | 2500.18944 | -0.3963567 | 0.21136902 | -1.8751885 | 0.06076679 | 0.24810416 |
| Nktr        | 5996.9762  | -0.396406  | 0.24373195 | -1.6264016 | 0.10386426 | 0.33919327 |
| Spryd7      | 1465.65596 | -0.3964684 | 0.22083538 | -1.7953119 | 0.07260403 | 0.27469319 |
| Zfp839      | 1245.70497 | -0.3965228 | 0.18478164 | -2.1458991 | 0.03188103 | 0.16620246 |
| Ccdc90b     | 1687.33153 | -0.3965937 | 0.20888976 | -1.8985787 | 0.05761989 | 0.2392794  |
| Lrrc2       | 4608.52045 | -0.3966202 | 0.28378688 | -1.3975989 | 0.16223355 | 0.43363595 |
| Itpkb       | 168.430823 | -0.3966799 | 0.32084096 | -1.2363755 | 0.216319   | 0.50358934 |
| 9-Sep       | 9602.85506 | -0.3969034 | 0.24049308 | -1.6503733 | 0.0988666  | 0.32887155 |
| Plekha4     | 613.715868 | -0.3970353 | 0.27048241 | -1.4678785 | 0.14213723 | 0.40296716 |
| Ercc6l2     | 4248.24807 | -0.3970552 | 0.19839098 | -2.0013773 | 0.04535175 | 0.2066408  |
| Cmtm4       | 6121.48051 | -0.3970916 | 0.24027073 | -1.6526841 | 0.09839518 | 0.32810942 |
| Rims3       | 261.615133 | -0.3971064 | 0.27821291 | -1.4273471 | 0.15347987 | 0.42139963 |
| Gpr18       | 2.096388   | -0.3971375 | 0.28305052 | -1.4030624 | 0.16059823 | NA         |
| Clybl       | 2634.59228 | -0.3972321 | 0.23546002 | -1.6870468 | 0.09159436 | 0.31522522 |
| Serpine3    | 3.12067593 | -0.3973037 | 0.35384785 | -1.1228095 | 0.26151842 | NA         |
| Fbxo40      | 2.04902137 | -0.3973215 | 0.30663717 | -1.2957381 | 0.19506572 | NA         |
| Tymp        | 10.8814038 | -0.3974713 | 0.43114246 | -0.9219024 | 0.35657949 | 0.64779997 |
| Kat2a       | 7249.09162 | -0.3975692 | 0.20652673 | -1.9250252 | 0.0542262  | 0.23071728 |
| Lca5        | 602.861162 | -0.3978296 | 0.23597935 | -1.685866  | 0.09182161 | 0.31542255 |
| Slc8a2      | 198.348713 | -0.3978529 | 0.2967532  | -1.3406863 | 0.18002234 | 0.45863256 |
| Snord64     | 8.55980167 | -0.3978715 | 0.40305276 | -0.987145  | 0.32357156 | 0.61824073 |
| Arhgef4     | 386.577385 | -0.3981044 | 0.24492319 | -1.6254254 | 0.10407194 | 0.33939891 |
| Nr5a2       | 5935.84283 | -0.3982135 | 0.23631945 | -1.6850644 | 0.09197616 | 0.31581391 |
| Nt5c3       | 1533.1187  | -0.3983284 | 0.19705605 | -2.0213966 | 0.04323873 | 0.20047866 |
| Ppwd1       | 4135.37561 | -0.3983523 | 0.19800481 | -2.0118316 | 0.04423769 | 0.20335215 |
| Kdm4c       | 6945.26737 | -0.3984165 | 0.21901524 | -1.8191266 | 0.06889211 | 0.26700698 |
| Wrn         | 1839.14013 | -0.3985069 | 0.22974656 | -1.7345499 | 0.08282056 | 0.29806586 |
| Cep131      | 1655.5009  | -0.3987178 | 0.2127881  | -1.8737787 | 0.06096094 | 0.24855888 |
| Carns1      | 135.722485 | -0.3987885 | 0.30832827 | -1.2933895 | 0.19587638 | 0.47894238 |
| Itgb3       | 572.77366  | -0.399045  | 0.27187123 | -1.4677721 | 0.14216613 | 0.40296716 |
| Emr4        | 2.96105206 | -0.3990487 | 0.33532794 | -1.1900252 | 0.23403647 | NA         |
| Cdcp2       | 18.4522837 | -0.3991935 | 0.41847355 | -0.9539276 | 0.34012027 | 0.63351423 |
| Dclre1c     | 2064.52282 | -0.3992477 | 0.21026628 | -1.8987718 | 0.05759449 | 0.2392794  |
| Lmnb1       | 31983.9579 | -0.3994052 | 0.19899558 | -2.0071059 | 0.04473839 | 0.20486653 |
| Prex2       | 380.621379 | -0.3994855 | 0.36595545 | -1.0916233 | 0.27499872 | 0.5675013  |
| Tnfrsf14    | 6.51328785 | -0.3995016 | 0.41226323 | -0.9690449 | 0.33252281 | 0.62583232 |

|             |            |            |            |            |            |            |
|-------------|------------|------------|------------|------------|------------|------------|
| Fbxw5       | 1538.77934 | -0.3995555 | 0.17442953 | -2.2906414 | 0.02198416 | 0.13131136 |
| Fgd2        | 88.92355   | -0.3996559 | 0.43049138 | -0.9283714 | NA         | NA         |
| Slc7a5      | 13914.7045 | -0.3996587 | 0.22552772 | -1.7721046 | 0.0763772  | 0.28353829 |
| B330016D10l | 38.6925716 | -0.3999497 | 0.37907061 | -1.0550797 | 0.29138888 | 0.58507276 |
| Hnrnp2      | 4333.46896 | -0.4000693 | 0.17723273 | -2.2573107 | 0.02398867 | 0.13873104 |
| Wwc2        | 6245.57356 | -0.4000971 | 0.29885451 | -1.3387689 | 0.18064593 | 0.45932388 |
| Eda2r       | 4423.29888 | -0.4002158 | 0.23563527 | -1.6984545 | 0.08942201 | 0.31119611 |
| Zbtb41      | 1626.40412 | -0.4002216 | 0.21216732 | -1.8863488 | 0.05924796 | 0.24413488 |
| Slc38a5     | 28.4794068 | -0.4002686 | 0.42529371 | -0.9411579 | 0.34662392 | 0.63881828 |
| Slc35f5     | 723.53783  | -0.400304  | 0.34439244 | -1.1623483 | 0.24509403 | 0.537854   |
| Fzr1        | 5492.89824 | -0.4003463 | 0.2124206  | -1.8846867 | 0.05947215 | 0.24466969 |
| Snora68     | 232.565991 | -0.4009891 | 0.33852802 | -1.1845078 | 0.2362121  | 0.52810283 |
| Mapk6       | 9226.39552 | -0.4012108 | 0.16357016 | -2.4528362 | 0.01417349 | 0.09774363 |
| Rad51ap1    | 3037.98811 | -0.4012298 | 0.15440556 | -2.5985451 | 0.00936198 | 0.07382763 |
| Grpel2      | 2959.91556 | -0.4015906 | 0.15767833 | -2.5468977 | 0.01086853 | 0.08148388 |
| Sars        | 18708.5344 | -0.4016995 | 0.20779715 | -1.933133  | 0.05321981 | 0.22884208 |
| Bcl9        | 1567.34782 | -0.4017243 | 0.20133365 | -1.9953163 | 0.04600839 | 0.20850713 |
| Lims1       | 6767.93189 | -0.4019357 | 0.19533741 | -2.0576483 | 0.03962391 | 0.19012386 |
| Gm11517     | 13.1734021 | -0.4019758 | 0.43222055 | -0.9300247 | 0.35235831 | 0.64439796 |
| Mospd2      | 1968.57748 | -0.4020984 | 0.18498824 | -2.1736431 | 0.02973195 | 0.15846274 |
| Lnpep       | 2867.02261 | -0.4021707 | 0.35001329 | -1.1490156 | 0.25054954 | 0.54405045 |
| Ablim2      | 780.933899 | -0.4025638 | 0.34391549 | -1.170531  | 0.24178733 | 0.53421167 |
| Zfp874b     | 1173.46595 | -0.4026994 | 0.20419481 | -1.9721336 | 0.04859436 | 0.21577978 |
| Kif18b      | 5185.35796 | -0.4027011 | 0.21365847 | -1.8847887 | 0.05945837 | 0.24466969 |
| Golga4      | 9344.95181 | -0.4027174 | 0.15808595 | -2.5474584 | 0.01085108 | 0.08140944 |
| Deaf1       | 2033.33333 | -0.402867  | 0.20281175 | -1.9864087 | 0.04698796 | 0.21094394 |
| Tcea1       | 5391.83076 | -0.4029298 | 0.16694944 | -2.4134842 | 0.01580081 | 0.10527783 |
| Map6d1      | 382.824474 | -0.4030016 | 0.28351553 | -1.4214445 | 0.15518759 | 0.4237087  |
| Bpgm        | 1072.31    | -0.4031572 | 0.19512742 | -2.0661228 | 0.03881689 | 0.18832092 |
| Kat6a       | 5686.77785 | -0.4031843 | 0.29086606 | -1.3861511 | 0.16570077 | 0.43935424 |
| Atad3a      | 5388.30768 | -0.403322  | 0.16978719 | -2.3754563 | 0.01752727 | 0.11309816 |
| Mef2d       | 1241.87529 | -0.4034473 | 0.27425951 | -1.471042  | 0.14127975 | 0.40171844 |
| Ebna1bp2    | 8204.52356 | -0.4036582 | 0.16143456 | -2.500445  | 0.01240374 | 0.08917065 |
| St6galnac6  | 1374.27025 | -0.4037096 | 0.22860069 | -1.7660033 | 0.07739529 | 0.28561324 |
| Lyar        | 9006.54274 | -0.4037369 | 0.17120889 | -2.3581541 | 0.01836607 | 0.11671872 |
| Clock       | 3475.84326 | -0.4037824 | 0.19478655 | -2.0729481 | 0.03817711 | 0.18618201 |
| Atrx        | 22861.5086 | -0.4038183 | 0.24929176 | -1.6198624 | 0.10526183 | 0.34152447 |
| Tbl1x       | 3586.71637 | -0.4038893 | 0.26251005 | -1.5385669 | 0.12391006 | 0.37572572 |
| Glrx        | 2247.0694  | -0.403926  | 0.3352461  | -1.2048641 | 0.22825578 | 0.51887234 |
| Gm13212     | 895.448396 | -0.4039896 | 0.29104723 | -1.3880551 | 0.16512026 | 0.43856279 |
| Zfp106      | 37231.725  | -0.4040081 | 0.19821366 | -2.0382457 | 0.04152537 | 0.19544824 |

|             |            |            |            |            |            |            |
|-------------|------------|------------|------------|------------|------------|------------|
| Nyap1       | 525.452375 | -0.4040487 | 0.2106973  | -1.917674  | 0.05515236 | 0.23325384 |
| Trappc6a    | 1169.76945 | -0.4041368 | 0.29278255 | -1.380331  | 0.16748476 | 0.44231821 |
| Rps6        | 43919.7123 | -0.4046065 | 0.20741441 | -1.9507154 | 0.0510909  | 0.2224908  |
| Dusp11      | 6648.29401 | -0.4047174 | 0.16679059 | -2.4265002 | 0.01524524 | 0.10263148 |
| Wdr55       | 2286.60073 | -0.4047592 | 0.17383929 | -2.3283527 | 0.01989338 | 0.12344853 |
| Zbtb38      | 1644.73567 | -0.4048543 | 0.22471511 | -1.8016336 | 0.07160307 | 0.2726443  |
| Birc5       | 9106.20495 | -0.404889  | 0.17184408 | -2.3561417 | 0.01846587 | 0.11711369 |
| Gm16880     | 21.3551032 | -0.4051823 | 0.42425588 | -0.9550424 | 0.33955626 | 0.63307031 |
| Mtmr14      | 3344.83761 | -0.4052165 | 0.19542684 | -2.0734948 | 0.03812625 | 0.18603746 |
| Atp2b3      | 39.5991694 | -0.4053603 | 0.43226692 | -0.9377546 | 0.34837056 | 0.6406706  |
| Gatsl2      | 305.242509 | -0.4054473 | 0.30867711 | -1.3134998 | 0.1890146  | 0.47055017 |
| Stxbp2      | 5605.1029  | -0.4054611 | 0.25790316 | -1.5721446 | 0.11591701 | 0.36168247 |
| Smu1        | 15569.3688 | -0.4054831 | 0.15161567 | -2.6744145 | 0.00748599 | 0.06313154 |
| Spin1       | 5264.50433 | -0.4056248 | 0.21333782 | -1.9013264 | 0.05725927 | 0.23865959 |
| Plekhh3     | 349.435423 | -0.4056449 | 0.29913084 | -1.3560785 | 0.1750742  | 0.45308351 |
| Nol11       | 11216.2218 | -0.4057814 | 0.18446839 | -2.1997341 | 0.02782576 | 0.15220487 |
| Cables1     | 670.252238 | -0.4057894 | 0.32367765 | -1.2536838 | 0.20995697 | 0.49635769 |
| Lrrc17      | 6.02433717 | -0.4058622 | 0.40254203 | -1.0082481 | 0.31333538 | 0.60787966 |
| Slc36a3     | 23.0421169 | -0.4061857 | 0.42663478 | -0.9520689 | 0.34106203 | 0.63465177 |
| Trim3       | 1031.27586 | -0.4063041 | 0.19497354 | -2.0838936 | 0.03716985 | 0.18280466 |
| Epha1       | 44.9964639 | -0.406377  | 0.43019287 | -0.9446391 | 0.34484318 | 0.63773152 |
| 2610524H06l | 1494.78167 | -0.4064184 | 0.2166391  | -1.8760157 | 0.06065312 | 0.24782988 |
| Ccdc39      | 201.12511  | -0.4065014 | 0.29343971 | -1.3852978 | 0.16596142 | 0.43974546 |
| Cyp3a13     | 17.5572315 | -0.4068409 | 0.42998607 | -0.9461722 | 0.34406076 | 0.63732661 |
| Fam185a     | 1463.66318 | -0.4068871 | 0.21612859 | -1.882616  | 0.05975242 | 0.24543315 |
| Zfp367      | 2871.51624 | -0.4070013 | 0.19822913 | -2.0531862 | 0.04005452 | 0.19132821 |
| Tmem55b     | 4207.35166 | -0.4071394 | 0.16946195 | -2.4025415 | 0.01628159 | 0.10742776 |
| C1d         | 3441.87802 | -0.4071642 | 0.20833043 | -1.9544153 | 0.05065213 | 0.22126158 |
| Cks1brt     | 3.15504812 | -0.4072362 | 0.35449365 | -1.1487829 | 0.25064551 | NA         |
| Rev3l       | 5811.97813 | -0.4072933 | 0.26457153 | -1.5394449 | 0.12369572 | 0.37555488 |
| Nup205      | 18813.9071 | -0.4076116 | 0.18870661 | -2.1600282 | 0.03077049 | 0.16198777 |
| Yae1d1      | 998.707757 | -0.4076207 | 0.22710095 | -1.7948878 | 0.07267158 | 0.27476678 |
| Trappc9     | 1831.57174 | -0.4077051 | 0.19986561 | -2.0398963 | 0.04136066 | 0.19532548 |
| Papd7       | 2285.06258 | -0.4078309 | 0.18877549 | -2.1604018 | 0.03074158 | 0.1618904  |
| Zfp941      | 1300.41204 | -0.408695  | 0.1824022  | -2.2406253 | 0.02505035 | 0.14269526 |
| Dexi        | 323.198184 | -0.4090191 | 0.23611179 | -1.7323112 | 0.08321816 | 0.29887429 |
| Casp3       | 7527.73449 | -0.4090459 | 0.22946471 | -1.7826094 | 0.07464992 | 0.27936486 |
| Phex        | 11.9304403 | -0.4091094 | 0.43018763 | -0.9510022 | 0.34160326 | 0.63498354 |
| Sfrp1       | 13639.2154 | -0.4091279 | 0.20931565 | -1.9545978 | 0.05063056 | 0.2212295  |
| Grin2c      | 85.9860807 | -0.4094981 | 0.42062304 | -0.9735513 | 0.33027939 | 0.62369343 |
| Syn3        | 40.9221475 | -0.4095275 | 0.37477136 | -1.0927397 | 0.27450811 | 0.56715903 |

|             |            |            |            |            |            |            |
|-------------|------------|------------|------------|------------|------------|------------|
| Ndufb5      | 8934.24649 | -0.4096025 | 0.19447926 | -2.10615   | 0.03519133 | 0.17733647 |
| Kdm4b       | 2789.69263 | -0.4101451 | 0.24796763 | -1.6540268 | 0.09812208 | 0.3276452  |
| Sgms1       | 2914.34049 | -0.4102347 | 0.20927644 | -1.9602525 | 0.04996629 | 0.21956082 |
| Msmo1       | 15737.6633 | -0.4104022 | 0.20625621 | -1.9897691 | 0.04661638 | 0.20988317 |
| Bdkrb1      | 5.0137144  | -0.4109476 | 0.35478833 | -1.1582895 | 0.24674591 | NA         |
| Gm12298     | 4.67014069 | -0.4110848 | 0.39271327 | -1.046781  | 0.29520061 | NA         |
| Naaladl1    | 168.958464 | -0.411129  | 0.26458872 | -1.5538419 | 0.12022214 | 0.36901616 |
| Nrgn        | 58.8630695 | -0.4112678 | 0.40152397 | -1.0242671 | 0.30570913 | 0.60009099 |
| BC055324    | 6495.52767 | -0.4115402 | 0.15343039 | -2.6822602 | 0.00731265 | 0.06196749 |
| Zbtb25      | 900.242943 | -0.4116622 | 0.20842381 | -1.9751206 | 0.04825446 | 0.21501579 |
| Gm5089      | 7.24755005 | -0.4117424 | 0.39523117 | -1.0417762 | 0.29751545 | 0.59189285 |
| Lfng        | 87.8383371 | -0.4119007 | 0.39906219 | -1.0321716 | 0.30199174 | 0.59705597 |
| Hist1h2ai   | 4.4850627  | -0.4121497 | 0.39841507 | -1.0344731 | 0.30091504 | NA         |
| Vps13b      | 3457.46087 | -0.4121898 | 0.21631955 | -1.9054672 | 0.05671937 | 0.23749134 |
| Pdzd7       | 314.370668 | -0.4124027 | 0.33651225 | -1.2255205 | 0.22037918 | 0.50895393 |
| Kdm7a       | 1598.17126 | -0.412445  | 0.293923   | -1.4032417 | 0.16054477 | 0.4319432  |
| Gjb5        | 1868.36395 | -0.4124678 | 0.31678302 | -1.3020514 | 0.19289882 | 0.47560633 |
| Dlgap1      | 293.144109 | -0.4125477 | 0.38215043 | -1.0795426 | 0.28034591 | 0.57238395 |
| Fzd10       | 2634.53915 | -0.4125975 | 0.2335759  | -1.7664388 | 0.07732226 | 0.28561324 |
| Wdr16       | 90.2529943 | -0.4127929 | 0.39637261 | -1.0414265 | 0.29767766 | 0.59197672 |
| Tex26       | 24.4438586 | -0.4128178 | 0.41884678 | -0.9856058 | 0.32432657 | 0.618534   |
| 4930414L22F | 54.2223849 | -0.412907  | 0.33670861 | -1.2263037 | 0.22008442 | 0.50864133 |
| 2610015P09F | 931.143372 | -0.4130275 | 0.22853688 | -1.8072686 | 0.07072041 | 0.27054687 |
| Unc93b1     | 328.328912 | -0.4130573 | 0.33585939 | -1.2298517 | 0.21875263 | 0.50706041 |
| Osbp15      | 124.925232 | -0.4138132 | 0.35137694 | -1.1776904 | 0.23892006 | 0.53094189 |
| Eif3d       | 23647.3229 | -0.4139609 | 0.18237778 | -2.269799  | 0.02321978 | 0.13620929 |
| Dusp13      | 29.1803327 | -0.4141117 | 0.43200179 | -0.9585879 | 0.33776638 | 0.63097804 |
| Rpl22       | 45046.7249 | -0.4141646 | 0.21720179 | -1.9068193 | 0.05654399 | 0.23694843 |
| Efhb        | 220.910361 | -0.414303  | 0.28334121 | -1.4622051 | 0.14368502 | 0.40532857 |
| D230025D16  | 11530.1583 | -0.4143147 | 0.23924633 | -1.7317494 | 0.0833182  | 0.29895739 |
| Sft2d1      | 357.895029 | -0.414358  | 0.22468548 | -1.8441691 | 0.0651585  | 0.25842385 |
| Wdr43       | 19096.1999 | -0.4144192 | 0.16757745 | -2.4730007 | 0.01339839 | 0.09393974 |
| Zgrf1       | 2447.21946 | -0.4144955 | 0.20559028 | -2.0161242 | 0.04378699 | 0.20199689 |
| Snord91a    | 21.842139  | -0.4149808 | 0.41842608 | -0.991766  | 0.32131168 | 0.61558678 |
| Rnf32       | 321.93228  | -0.4151546 | 0.27077537 | -1.5332066 | 0.12522497 | 0.37835116 |
| Setdb1      | 10105.7223 | -0.4154209 | 0.23467939 | -1.7701634 | 0.07669992 | 0.28426131 |
| 1700025G04I | 1213.96203 | -0.4154288 | 0.22898902 | -1.8141867 | 0.06964899 | 0.26869547 |
| Tnks2       | 33210.5715 | -0.4155116 | 0.162276   | -2.5605238 | 0.01045145 | 0.07982835 |
| Hist1h2ag   | 4.99558905 | -0.4157891 | 0.40100525 | -1.0368669 | 0.29979788 | NA         |
| B3gntl1     | 1120.06416 | -0.4158589 | 0.20050098 | -2.074099  | 0.03807011 | 0.18588017 |
| Ntmt1       | 1559.05172 | -0.4161528 | 0.22200607 | -1.874511  | 0.06086003 | 0.24837426 |

|             |            |            |            |            |            |            |
|-------------|------------|------------|------------|------------|------------|------------|
| Tmem106b    | 3377.07308 | -0.4163186 | 0.19629301 | -2.1209039 | 0.03392989 | 0.17282793 |
| Ppid        | 14960.7693 | -0.4164308 | 0.18575646 | -2.2418108 | 0.0249736  | 0.14236991 |
| C1s1        | 354.040525 | -0.4167033 | 0.39410956 | -1.0573287 | 0.2903616  | 0.584217   |
| Gps1        | 6397.36776 | -0.4168545 | 0.15802979 | -2.637822  | 0.00834404 | 0.06836572 |
| Eif3i       | 16342.9095 | -0.4168933 | 0.19218567 | -2.1692215 | 0.03006587 | 0.15962936 |
| Zfp428      | 4030.3658  | -0.4169105 | 0.23818492 | -1.7503646 | 0.08005542 | 0.29191981 |
| Gm884       | 8.85561374 | -0.4169879 | 0.4122393  | -1.011519  | 0.31176808 | 0.60634544 |
| Psmc6       | 19084.5886 | -0.4171525 | 0.16802815 | -2.4826348 | 0.01304147 | 0.09222734 |
| Lrig3       | 2088.68777 | -0.4172357 | 0.22800073 | -1.8299752 | 0.06725364 | 0.2633085  |
| Fam208a     | 11876.5467 | -0.4174262 | 0.21537954 | -1.9380958 | 0.05261154 | 0.22676332 |
| Hist1h1b    | 7.12502076 | -0.4175548 | 0.42393193 | -0.9849572 | 0.3246451  | 0.61877141 |
| Agfg2       | 1764.38472 | -0.4176105 | 0.20772049 | -2.0104446 | 0.04438415 | 0.2037243  |
| Aim2        | 6254.96142 | -0.4177426 | 0.21459113 | -1.9466909 | 0.05157181 | 0.22364716 |
| Gm2382      | 80.0922026 | -0.4180665 | 0.34609837 | -1.2079411 | 0.22706991 | 0.51714743 |
| Pskh1       | 1722.30808 | -0.418257  | 0.2180665  | -1.9180248 | 0.05510786 | 0.23325384 |
| Acsl1       | 3503.8679  | -0.4185973 | 0.20022415 | -2.0906432 | 0.03656006 | 0.18129641 |
| Mis18a      | 1991.26787 | -0.4187838 | 0.16314451 | -2.56695   | 0.01025974 | 0.07876795 |
| Itpr1       | 3631.68541 | -0.418988  | 0.20548601 | -2.0390098 | 0.04144905 | 0.19532548 |
| Oxld1       | 186.419368 | -0.4192383 | 0.32445685 | -1.2921234 | 0.19631443 | 0.47933634 |
| Slc25a41    | 20.7068056 | -0.4192587 | 0.42034945 | -0.9974052 | 0.31856788 | 0.61238106 |
| Cars        | 13004.968  | -0.4192641 | 0.15818886 | -2.6504023 | 0.0080396  | 0.06678621 |
| Actr8       | 3136.54408 | -0.4195641 | 0.16196641 | -2.5904391 | 0.00958536 | 0.07501857 |
| Tmem178     | 31.6438728 | -0.4196208 | 0.42550551 | -0.9861701 | 0.32404966 | 0.618534   |
| Fbxo5       | 6676.90425 | -0.4197235 | 0.19885003 | -2.110754  | 0.03479346 | 0.17581822 |
| Spata7      | 1090.5526  | -0.4197296 | 0.16774948 | -2.5021214 | 0.01234516 | 0.08892059 |
| Lrrcc1      | 2555.55867 | -0.4197643 | 0.20959667 | -2.0027243 | 0.04520689 | 0.20622717 |
| Pnpt1       | 9212.03782 | -0.4197764 | 0.1584483  | -2.6492958 | 0.00806597 | 0.06696951 |
| Baiap2l1    | 229.859577 | -0.4197841 | 0.24672517 | -1.7014239 | 0.08886342 | 0.31019417 |
| Rhebl1      | 1295.4247  | -0.4199553 | 0.19575703 | -2.1452884 | 0.0319298  | 0.1663151  |
| Hdac5       | 3139.73757 | -0.4200157 | 0.26429115 | -1.5892159 | 0.11201167 | 0.35389952 |
| Bcas1       | 309.948889 | -0.420121  | 0.31768961 | -1.3224258 | 0.18602639 | 0.46659618 |
| 4933402E13F | 410.545711 | -0.4201508 | 0.35057    | -1.198479  | 0.23073058 | 0.52243612 |
| Cox4i2      | 48.9642677 | -0.4201553 | 0.41522278 | -1.0118791 | 0.31159587 | 0.60623388 |
| Sptan1      | 27638.8168 | -0.4202293 | 0.22494938 | -1.8681061 | 0.06174729 | 0.25019074 |
| Cdca4       | 4210.71255 | -0.420248  | 0.19428527 | -2.1630463 | 0.03053762 | 0.16125314 |
| Zfp330      | 4436.48296 | -0.420427  | 0.23958348 | -1.7548245 | 0.07928933 | 0.29047893 |
| D630045J12F | 1076.28322 | -0.4205351 | 0.24051837 | -1.7484532 | 0.08038559 | 0.29234712 |
| Fam204a     | 1723.68775 | -0.4205987 | 0.20465742 | -2.0551354 | 0.03986592 | 0.19098069 |
| Rpl37       | 34340.6519 | -0.4207522 | 0.22003867 | -1.912174  | 0.05585387 | 0.23532473 |
| Tbc1d22a    | 1423.49799 | -0.4208063 | 0.20772333 | -2.0258019 | 0.04278509 | 0.19938596 |
| Top1mt      | 456.089252 | -0.4208067 | 0.22999636 | -1.8296233 | 0.06730628 | 0.26331573 |

|             |            |            |            |            |            |            |
|-------------|------------|------------|------------|------------|------------|------------|
| Etaa1       | 5935.87205 | -0.4210336 | 0.19039049 | -2.2114212 | 0.02700668 | 0.14914095 |
| Oas1h       | 4.71596422 | -0.4211228 | 0.29916851 | -1.407644  | NA         | NA         |
| Fam81a      | 3159.08461 | -0.4211454 | 0.26744622 | -1.574692  | 0.11532756 | 0.36027701 |
| Pkn3        | 1174.42289 | -0.4213302 | 0.18663439 | -2.2575161 | 0.02397584 | 0.13873104 |
| Cxcl11      | 6.76367603 | -0.4213684 | 0.39395985 | -1.069572  | 0.28481199 | 0.57774517 |
| Plekhn1     | 198.677484 | -0.4214319 | 0.28267831 | -1.4908533 | 0.13600001 | 0.39384286 |
| Nup43       | 7337.37718 | -0.4214804 | 0.16999405 | -2.4793834 | 0.01316098 | 0.09262695 |
| Ccdc85a     | 103.151413 | -0.4214852 | 0.41183394 | -1.0234347 | 0.30610234 | 0.60042854 |
| Tnfaip6     | 166.945751 | -0.4215036 | 0.39029888 | -1.0799508 | 0.28016411 | 0.57238012 |
| Olfm2       | 91.0372304 | -0.4215844 | 0.34481713 | -1.2226319 | 0.22146878 | 0.50971707 |
| Arhgef3     | 1595.18627 | -0.4216067 | 0.26188454 | -1.6098955 | 0.10742067 | 0.34593061 |
| Fgf3        | 328.783685 | -0.4217148 | 0.25233415 | -1.6712553 | 0.09467127 | 0.32102766 |
| Gm5595      | 2579.93133 | -0.4217672 | 0.21773075 | -1.9371046 | 0.05273256 | 0.22703322 |
| BC025920    | 99.8977935 | -0.4219565 | 0.32486178 | -1.29888   | 0.1939851  | 0.47678006 |
| Elmo2       | 3130.48462 | -0.422075  | 0.227168   | -1.8579861 | 0.06317099 | 0.25397417 |
| Abhd2       | 2108.80201 | -0.4221566 | 0.29180914 | -1.4466874 | 0.14798451 | 0.41286456 |
| Robo1       | 2768.00039 | -0.4222771 | 0.25388278 | -1.6632757 | 0.09625725 | 0.32400358 |
| Cog5        | 2459.53898 | -0.4224382 | 0.18817545 | -2.2449164 | 0.0247735  | 0.1416891  |
| Lin54       | 2603.54802 | -0.4225008 | 0.21424769 | -1.9720204 | 0.04860727 | 0.21577978 |
| Zfp763      | 1517.57618 | -0.422655  | 0.19573488 | -2.1593238 | 0.03082506 | 0.16216525 |
| 1700030K09F | 1059.91198 | -0.4226849 | 0.25118881 | -1.6827378 | 0.09242587 | 0.31658914 |
| Bard1       | 3839.25388 | -0.4228426 | 0.20812004 | -2.0317244 | 0.04218156 | 0.1974016  |
| Sdad1       | 9780.54595 | -0.4230219 | 0.15569234 | -2.7170376 | 0.00658691 | 0.05748209 |
| Zcchc14     | 2038.48408 | -0.4230622 | 0.21935684 | -1.9286481 | 0.05377456 | 0.229928   |
| Gnl3        | 21734.9542 | -0.4231758 | 0.17705312 | -2.3901063 | 0.0168435  | 0.10996357 |
| A630010A05I | 12.0796073 | -0.4232233 | 0.40812297 | -1.0369995 | 0.29973607 | 0.59454027 |
| Gpatch11    | 1198.00358 | -0.4232609 | 0.20137819 | -2.1018208 | 0.03556897 | 0.17860945 |
| Osbpl6      | 409.303762 | -0.4233414 | 0.40226417 | -1.0523964 | 0.2926177  | 0.58640437 |
| Sh2b3       | 608.028745 | -0.4233721 | 0.20875969 | -2.0280357 | 0.0425566  | 0.19862566 |
| Atoh1       | 5.77474839 | -0.4234097 | 0.40795748 | -1.0378771 | 0.29932726 | NA         |
| Dars        | 20671.8999 | -0.4234154 | 0.17367802 | -2.4379333 | 0.0147715  | 0.10047016 |
| Cct5        | 50607.8443 | -0.4234936 | 0.16715201 | -2.5335833 | 0.01129029 | 0.083927   |
| Snord19     | 85.5101442 | -0.4235777 | 0.31653719 | -1.3381608 | 0.18084403 | 0.45952704 |
| Arsj        | 7.27947867 | -0.4237143 | 0.40493496 | -1.0463762 | 0.29538738 | 0.59006926 |
| Gemin5      | 7600.61453 | -0.4237457 | 0.23209883 | -1.8257121 | 0.06789364 | 0.26468135 |
| Stk38       | 14302.4376 | -0.4237939 | 0.21298857 | -1.9897495 | 0.04661854 | 0.20988317 |
| Hook2       | 2836.56839 | -0.4239839 | 0.25745047 | -1.646856  | 0.09958764 | 0.33006978 |
| Phc1        | 14369.0652 | -0.4240957 | 0.23825677 | -1.7799945 | 0.07507685 | 0.28025934 |
| Zfp354b     | 44.7365722 | -0.4241121 | 0.34994815 | -1.2119284 | 0.22553981 | 0.51510788 |
| Espl1       | 9878.9116  | -0.4241202 | 0.23149295 | -1.8321084 | 0.06693527 | 0.26278979 |
| Gm8580      | 3.39523367 | -0.4243836 | 0.37762994 | -1.123808  | 0.26109447 | NA         |



|             |            |            |            |            |            |            |
|-------------|------------|------------|------------|------------|------------|------------|
| Ddhd2       | 3825.15935 | -0.424418  | 0.23314584 | -1.8203971 | 0.06869855 | 0.26648321 |
| Gltscr2     | 12477.2694 | -0.4244244 | 0.1735511  | -2.4455301 | 0.01446394 | 0.09926242 |
| Stag3       | 4850.78966 | -0.4244892 | 0.30835703 | -1.3766158 | 0.16863105 | 0.44348648 |
| A730056A06l | 6.43315054 | -0.4245123 | 0.41128994 | -1.0321484 | 0.30200259 | 0.59705597 |
| Ints4       | 7307.35492 | -0.4245733 | 0.14619108 | -2.9042352 | 0.00368151 | 0.03768843 |
| Prima1      | 16.5189898 | -0.4246694 | 0.43204322 | -0.9829326 | 0.32564061 | 0.61915114 |
| Slc10a7     | 3377.55672 | -0.4249713 | 0.18774305 | -2.2635795 | 0.02359999 | 0.13750599 |
| 9130019O22l | 165.526896 | -0.4249995 | 0.24545572 | -1.7314712 | 0.08336776 | 0.2990662  |
| Oxct1       | 7984.13075 | -0.425046  | 0.1754611  | -2.4224516 | 0.01541618 | 0.10337948 |
| Tgfb1       | 280.313385 | -0.4251108 | 0.36281826 | -1.1716907 | 0.24132125 | 0.53389786 |
| Zdhhc17     | 1640.77673 | -0.4252085 | 0.17552371 | -2.4225135 | 0.01541355 | 0.10337948 |
| Gm20605     | 75.9749227 | -0.4253341 | 0.3783165  | -1.1242811 | 0.2608938  | 0.55289719 |
| Cdkl5       | 325.174851 | -0.42536   | 0.27796527 | -1.5302631 | 0.12595163 | 0.37885621 |
| Zfp174      | 217.164826 | -0.4254299 | 0.29751491 | -1.4299448 | 0.15273285 | 0.42030588 |
| 5730405O15l | 62.8525786 | -0.4254329 | 0.39009396 | -1.0905909 | 0.27545294 | 0.56766083 |
| Aldh6a1     | 3156.31554 | -0.4254665 | 0.16330653 | -2.6053244 | 0.00917873 | 0.07289331 |
| Ttc38       | 522.228891 | -0.4256278 | 0.19299996 | -2.2053259 | 0.02743123 | 0.15081954 |
| Rnf7        | 10045.9386 | -0.4256527 | 0.33591883 | -1.2671295 | 0.20510898 | 0.4903111  |
| Paqr3       | 363.877469 | -0.4256629 | 0.25174006 | -1.6908828 | 0.0908592  | 0.31378    |
| Alyref      | 9838.85649 | -0.4257273 | 0.20045104 | -2.1238466 | 0.03368297 | 0.17190807 |
| Slc11a1     | 406.276356 | -0.4260815 | 0.41427554 | -1.0284978 | 0.30371573 | 0.5985887  |
| Fahd1       | 671.895504 | -0.4262557 | 0.2263322  | -1.8833189 | 0.05965717 | 0.24522196 |
| Odf1        | 3.12911759 | -0.4266316 | 0.32424758 | -1.3157588 | 0.18825502 | NA         |
| Abcb11      | 11.1237937 | -0.4268033 | 0.29424696 | -1.4504935 | NA         | NA         |
| Evc         | 756.153132 | -0.4268202 | 0.23885395 | -1.7869505 | 0.07394549 | 0.27769291 |
| Dars2       | 3357.59484 | -0.4268483 | 0.17497007 | -2.4395504 | 0.01470555 | 0.10027622 |
| Cmtr2       | 1396.00148 | -0.426955  | 0.25266325 | -1.6898185 | 0.09106268 | 0.31420362 |
| BC048546    | 2.85592138 | -0.4270426 | 0.34692126 | -1.2309496 | 0.21834173 | NA         |
| Sec14l2     | 702.720918 | -0.4270786 | 0.2259023  | -1.8905457 | 0.05868502 | 0.24244475 |
| Zfp825      | 1018.50819 | -0.4271021 | 0.16727728 | -2.5532582 | 0.01067203 | 0.08075951 |
| Sbsn        | 74.1880272 | -0.427107  | 0.36013093 | -1.1859769 | 0.23563143 | 0.52749347 |
| Ago1        | 7309.15459 | -0.427631  | 0.25676403 | -1.665463  | 0.09582042 | 0.32344952 |
| Slc12a1     | 9.83194985 | -0.4277389 | 0.42163338 | -1.0144807 | 0.31035343 | 0.60487608 |
| Zfp101      | 961.184749 | -0.4281101 | 0.21537575 | -1.987736  | 0.04684089 | 0.21046596 |
| Olfml1      | 216.617796 | -0.4281522 | 0.28335674 | -1.5110007 | 0.13078827 | 0.38666893 |
| Banf1       | 14701.5846 | -0.4283706 | 0.20463193 | -2.0933713 | 0.03631602 | 0.18077801 |
| Baiap3      | 205.560154 | -0.428422  | 0.37609899 | -1.1391204 | NA         | NA         |
| Rabif       | 4943.05014 | -0.4285873 | 0.17556982 | -2.4411214 | 0.01464173 | 0.09999717 |
| Uevld       | 1610.38918 | -0.4286068 | 0.2007539  | -2.1349863 | 0.03276213 | 0.16898306 |
| Crmp1       | 548.674675 | -0.428974  | 0.38492033 | -1.1144488 | 0.26508668 | 0.55685032 |
| 2810021J22R | 1161.52414 | -0.4290441 | 0.23595814 | -1.818306  | 0.06901738 | 0.26716458 |

|             |            |            |            |            |            |            |
|-------------|------------|------------|------------|------------|------------|------------|
| Apc         | 9470.44043 | -0.4290492 | 0.27252774 | -1.5743324 | 0.11541063 | 0.3603537  |
| Siae        | 1095.29163 | -0.4292712 | 0.21533851 | -1.9934717 | 0.04620982 | 0.20895868 |
| Mtmr2       | 5504.64763 | -0.4293743 | 0.14830244 | -2.8952613 | 0.00378843 | 0.03838038 |
| Stc2        | 843.979343 | -0.4294854 | 0.32747681 | -1.3114988 | 0.18968931 | 0.4714053  |
| Zkscan2     | 201.012448 | -0.4295159 | 0.25789722 | -1.6654538 | 0.09582226 | 0.32344952 |
| Ttc14       | 8178.31795 | -0.429582  | 0.18840598 | -2.2800867 | 0.02260254 | 0.13372895 |
| Cdc27       | 8433.01451 | -0.4296831 | 0.22017081 | -1.9515898 | 0.05098692 | 0.22228697 |
| Gbgt1       | 265.744934 | -0.4297118 | 0.30005377 | -1.4321162 | 0.15211058 | 0.41948425 |
| Unk         | 1763.85066 | -0.429932  | 0.21090915 | -2.0384702 | 0.04150293 | 0.19544364 |
| Edrf1       | 3970.95296 | -0.4304541 | 0.18817802 | -2.2874836 | 0.02216761 | 0.1320799  |
| St3gal6     | 91.1755791 | -0.4305288 | 0.40141434 | -1.0725298 | 0.28348216 | 0.57581387 |
| Ahctf1      | 15513.5643 | -0.4306649 | 0.22048318 | -1.9532779 | 0.05078668 | 0.22164643 |
| Igln5       | 9.40080092 | -0.4308317 | 0.42494574 | -1.0138511 | 0.3106538  | 0.60523599 |
| Bmp7        | 939.799867 | -0.4308996 | 0.34218144 | -1.2592722 | 0.20793202 | 0.49345463 |
| Pdzd4       | 1414.19436 | -0.4309034 | 0.22136454 | -1.9465783 | 0.05158532 | 0.22364716 |
| 5730409E04F | 285.734947 | -0.4309669 | 0.23253015 | -1.8533808 | 0.0638278  | 0.25555771 |
| Strn4       | 5091.88393 | -0.4310963 | 0.18669637 | -2.3090769 | 0.02093932 | 0.12779721 |
| 4933440M02  | 6.30084297 | -0.4311715 | 0.41259864 | -1.0450143 | 0.29601636 | 0.59070325 |
| Sfi1        | 397.762454 | -0.4314426 | 0.39916612 | -1.0808598 | 0.27975949 | 0.57221358 |
| Zwilch      | 9209.67882 | -0.4316946 | 0.15380865 | -2.8066993 | 0.00500519 | 0.04703796 |
| St3gal4     | 1849.93151 | -0.4320442 | 0.21932971 | -1.969839  | 0.04885682 | 0.21621299 |
| Kat2b       | 7439.31707 | -0.4320886 | 0.19240469 | -2.2457279 | 0.02472144 | 0.1416315  |
| Abcb7       | 7144.25371 | -0.4321686 | 0.18783065 | -2.3008415 | 0.02140059 | 0.12925061 |
| Zim1        | 22.5491552 | -0.4322025 | 0.4223987  | -1.0232099 | 0.30620862 | 0.60048553 |
| Srebf1      | 6793.82629 | -0.4323231 | 0.27558409 | -1.5687518 | 0.11670578 | 0.36261569 |
| Csrp2bp     | 3977.27583 | -0.4323257 | 0.20447077 | -2.1143644 | 0.03448415 | 0.1745648  |
| Lypd5       | 2.21511017 | -0.4324442 | 0.29244054 | -1.4787423 | 0.13920921 | NA         |
| Nr1d1       | 519.799777 | -0.4328387 | 0.2891237  | -1.4970708 | 0.13437484 | 0.39168943 |
| Slc9a8      | 2295.96237 | -0.4330054 | 0.16184291 | -2.6754673 | 0.00746251 | 0.06303616 |
| Fam169a     | 8392.23699 | -0.4331482 | 0.20011938 | -2.1644491 | 0.0304299  | 0.16079352 |
| Crx         | 10.7080575 | -0.4333531 | 0.4125512  | -1.0504225 | 0.29352389 | 0.58737844 |
| Atp4a       | 13.5385532 | -0.4334895 | 0.43220919 | -1.0029624 | 0.31587902 | 0.61021548 |
| Acot9       | 8606.00452 | -0.4334996 | 0.17150717 | -2.5275887 | 0.01148488 | 0.08472551 |
| Ctage5      | 5985.70421 | -0.4336059 | 0.1999803  | -2.1682431 | 0.0301402  | 0.15991477 |
| Lcp2        | 3.41117334 | -0.4336399 | 0.33743458 | -1.2851079 | 0.19875457 | NA         |
| Mbip        | 1907.63321 | -0.4337334 | 0.1785972  | -2.4285564 | 0.01515907 | 0.10231712 |
| Fam114a1    | 257.214896 | -0.4337646 | 0.37587439 | -1.1540148 | 0.24849411 | 0.54187974 |
| Tulp1       | 111.710679 | -0.4337734 | 0.32051723 | -1.3533546 | 0.17594239 | 0.45374462 |
| Zfp629      | 182.09072  | -0.433827  | 0.34453182 | -1.2591783 | 0.20796596 | 0.49345463 |
| Babam1      | 3366.07009 | -0.433849  | 0.21276159 | -2.0391322 | 0.04143684 | 0.19532548 |
| Rpl13       | 34039.0553 | -0.433923  | 0.22552246 | -1.9240789 | 0.0543447  | 0.23090918 |

|             |            |            |            |            |            |            |
|-------------|------------|------------|------------|------------|------------|------------|
| Gal3st3     | 186.365248 | -0.4340368 | 0.41383393 | -1.0488188 | 0.2942615  | 0.58856085 |
| 9930021J03R | 3063.92283 | -0.4343574 | 0.22574905 | -1.9240721 | 0.05434555 | 0.23090918 |
| Stk35       | 6206.18455 | -0.4344812 | 0.229093   | -1.8965276 | 0.05789031 | 0.24019536 |
| 1500012F01F | 5212.5975  | -0.4346003 | 0.21594912 | -2.0125124 | 0.04416595 | 0.20308242 |
| Snx2        | 11662.6876 | -0.4346255 | 0.25263834 | -1.7203467 | 0.08536945 | 0.30316973 |
| Enthd1      | 29.9088825 | -0.4346564 | 0.43172059 | -1.0068002 | 0.31403078 | 0.60841899 |
| Micu1       | 865.938678 | -0.4347304 | 0.18203421 | -2.38818   | 0.01693205 | 0.11021778 |
| Ppp1r12b    | 159.57741  | -0.4348848 | 0.33425421 | -1.3010601 | 0.19323787 | 0.47593318 |
| Pes1        | 15927.3508 | -0.4351272 | 0.19288826 | -2.2558511 | 0.02407996 | 0.13915549 |
| Kank2       | 12313.1371 | -0.4352332 | 0.17058144 | -2.5514689 | 0.01072699 | 0.08098075 |
| Vwa8        | 1938.47865 | -0.4352943 | 0.17944307 | -2.425807  | 0.01527439 | 0.10269633 |
| Snord100    | 325.619128 | -0.4354439 | 0.33768758 | -1.2894874 | 0.19722869 | 0.48031705 |
| Tpmt        | 1084.43386 | -0.4354931 | 0.23847207 | -1.8261808 | 0.06782303 | 0.26447241 |
| Sdhc        | 6644.26709 | -0.435749  | 0.17253984 | -2.5254979 | 0.01155345 | 0.08502965 |
| Intu        | 924.980315 | -0.4357841 | 0.22863868 | -1.9059948 | 0.05665088 | 0.23726846 |
| Rp2h        | 2930.44271 | -0.4364009 | 0.23092891 | -1.8897628 | 0.05878969 | 0.2426967  |
| Gcnt1       | 1997.61697 | -0.4364519 | 0.21020851 | -2.0762807 | 0.03786799 | 0.1850873  |
| Foxa2       | 10.4011763 | -0.437176  | 0.42788831 | -1.0217059 | 0.30692011 | 0.60142636 |
| Rad9a       | 2879.09507 | -0.4373549 | 0.17273986 | -2.5318704 | 0.01134559 | 0.08418971 |
| Zfp689      | 527.915645 | -0.43739   | 0.20042377 | -2.1823258 | 0.02908549 | 0.15634584 |
| Larp4       | 13171.8712 | -0.4376517 | 0.17759503 | -2.464324  | 0.0137272  | 0.09547055 |
| Strbp       | 7120.35354 | -0.4378106 | 0.1909531  | -2.2927651 | 0.02186153 | 0.13090824 |
| Nle1        | 2126.3377  | -0.437947  | 0.28793197 | -1.5210085 | 0.12825771 | 0.38231469 |
| Hist1h1d    | 6.53514499 | -0.4380235 | 0.42046752 | -1.0417535 | 0.29752598 | 0.59189285 |
| Serpine2    | 798.300031 | -0.4380349 | 0.35366396 | -1.2385625 | 0.21550756 | 0.50275397 |
| Mir290      | 61.5130048 | -0.4382967 | 0.42638576 | -1.0279347 | 0.30398056 | 0.59883476 |
| Zufsp       | 846.399093 | -0.4384518 | 0.19460705 | -2.2530109 | 0.02425846 | 0.13982331 |
| Foxred2     | 1375.5692  | -0.4385128 | 0.20761415 | -2.1121525 | 0.03467337 | 0.17535139 |
| Trp53i11    | 1020.10449 | -0.4390742 | 0.21524783 | -2.0398541 | 0.04136486 | 0.19532548 |
| Pisd-ps2    | 733.085919 | -0.4391041 | 0.1775266  | -2.4734552 | 0.01338136 | 0.09386265 |
| Cd5         | 11.9498967 | -0.4391226 | 0.43214359 | -1.0161498 | 0.30955805 | 0.60444616 |
| Syt5        | 59.7862489 | -0.4391435 | 0.42784486 | -1.0264083 | 0.30469916 | 0.59956683 |
| Bcor        | 4285.70307 | -0.4392214 | 0.23099581 | -1.9014257 | 0.05724628 | 0.23865959 |
| Med30       | 2257.08797 | -0.4392488 | 0.20113595 | -2.1838403 | 0.02897398 | 0.15607012 |
| Gm10324     | 661.979897 | -0.4392772 | 0.27652844 | -1.5885426 | 0.11216371 | 0.3543079  |
| Foxh1       | 1890.58764 | -0.4397792 | 0.2599905  | -1.6915203 | 0.09073748 | 0.31363827 |
| Wee1        | 5368.65742 | -0.4397907 | 0.20063187 | -2.1920283 | 0.02837746 | 0.15440794 |
| Sms         | 2437.42102 | -0.4398885 | 0.19307951 | -2.2782766 | 0.0227101  | 0.13428318 |
| Lilra5      | 3.91031729 | -0.439907  | 0.31885947 | -1.3796265 | 0.16770168 | NA         |
| Hirip3      | 6340.47798 | -0.4399469 | 0.21775049 | -2.0204174 | 0.04334011 | 0.20074101 |
| Arnt        | 7196.29735 | -0.4400375 | 0.19189255 | -2.2931455 | 0.02183963 | 0.13082744 |

|             |            |            |            |            |            |            |
|-------------|------------|------------|------------|------------|------------|------------|
| Phyh        | 5190.72955 | -0.4400895 | 0.22054755 | -1.9954404 | 0.04599487 | 0.20850713 |
| Acaa2       | 3401.21426 | -0.4401493 | 0.23950264 | -1.8377637 | 0.06609723 | 0.26043013 |
| Kcnq1       | 8.17842593 | -0.4404908 | 0.40818394 | -1.0791478 | 0.28052185 | 0.57255444 |
| Gclm        | 3597.98468 | -0.4405107 | 0.25158904 | -1.7509136 | 0.07996079 | 0.29182592 |
| Insig1      | 11881.0714 | -0.4406787 | 0.25750875 | -1.7113154 | 0.0870229  | 0.30681806 |
| Satb1       | 178.366497 | -0.4408089 | 0.3746408  | -1.1766175 | 0.23934821 | 0.5313496  |
| Tsks        | 174.375395 | -0.4409997 | 0.34430214 | -1.280851  | 0.20024601 | 0.48369458 |
| Adssl1      | 378.187492 | -0.4412915 | 0.39838772 | -1.1076935 | 0.26799422 | 0.56067606 |
| Inpp1       | 6615.76488 | -0.4413103 | 0.27278873 | -1.617773  | 0.10571152 | 0.34245662 |
| Gm12504     | 44.2074948 | -0.4413891 | 0.36720227 | -1.2020327 | 0.22935085 | 0.52030092 |
| Rpl19       | 62018.8085 | -0.4414897 | 0.24426552 | -1.807417  | 0.07069728 | 0.27052496 |
| Rfng        | 1544.61761 | -0.4416095 | 0.20195349 | -2.1866892 | 0.02876522 | 0.15543015 |
| Dis3l       | 1634.41399 | -0.4416784 | 0.18738321 | -2.3570864 | 0.01841896 | 0.11695928 |
| Iars2       | 9771.84618 | -0.4418414 | 0.20293035 | -2.1773058 | 0.02945776 | 0.15731373 |
| Ccdc24      | 41.5724838 | -0.441903  | 0.38141475 | -1.1585891 | 0.24662373 | 0.53953931 |
| Mcm8        | 2699.39169 | -0.4419184 | 0.18495405 | -2.3893413 | 0.01687861 | 0.10998951 |
| Rpsa        | 92105.2888 | -0.4419332 | 0.20761185 | -2.128651  | 0.03328315 | 0.17053911 |
| Slc41a2     | 56.5556909 | -0.442038  | 0.35669612 | -1.2392565 | 0.21525053 | 0.50260677 |
| Lmx1b       | 43.1853518 | -0.4420409 | 0.40978333 | -1.0787186 | 0.2807132  | 0.5727301  |
| Adamts14    | 624.448437 | -0.4421154 | 0.31787399 | -1.390851  | 0.16427062 | 0.43721913 |
| Hif3a       | 530.261684 | -0.4421376 | 0.23111757 | -1.9130418 | 0.0557427  | 0.23498367 |
| Ptpn13      | 1599.98926 | -0.4421574 | 0.26302873 | -1.6810234 | 0.09275838 | 0.31711237 |
| Cdkal1      | 1848.25883 | -0.4422118 | 0.16337747 | -2.7066875 | 0.00679582 | 0.05874465 |
| Chd1        | 9573.42443 | -0.4424585 | 0.21890489 | -2.0212362 | 0.04325532 | 0.20049584 |
| Clec11a     | 56.9045997 | -0.4432744 | 0.34574334 | -1.2820909 | 0.19981075 | 0.48279318 |
| M1ap        | 2285.18957 | -0.443397  | 0.31747557 | -1.3966335 | 0.16252383 | 0.43388979 |
| Kcnh3       | 772.246131 | -0.4436339 | 0.28254599 | -1.57013   | 0.11638488 | 0.3623426  |
| Efcab11     | 354.024984 | -0.4437284 | 0.30701667 | -1.4452908 | 0.14837623 | 0.41351231 |
| 2610008E11F | 417.169426 | -0.4437615 | 0.20784012 | -2.1351097 | 0.03275205 | 0.16898306 |
| Aym1        | 9.59309748 | -0.4438313 | 0.42997045 | -1.0322368 | 0.30196119 | 0.59705597 |
| Kifc3       | 586.724403 | -0.4438837 | 0.41555638 | -1.0681671 | NA         | NA         |
| Rpl38       | 11339.3981 | -0.443899  | 0.23626906 | -1.8787862 | 0.06027369 | 0.24692207 |
| Ints2       | 7799.17775 | -0.4439384 | 0.23462464 | -1.892122  | 0.05847473 | 0.24189476 |
| Atg9b       | 594.076069 | -0.4439769 | 0.32965207 | -1.3468046 | 0.17804318 | 0.4556391  |
| Igbp1       | 6308.50093 | -0.444161  | 0.18811256 | -2.3611448 | 0.01821862 | 0.11619705 |
| C1rl        | 238.436495 | -0.4447117 | 0.30101129 | -1.4773922 | 0.13957055 | 0.39955955 |
| Hus1        | 5054.23675 | -0.4447336 | 0.18569548 | -2.3949622 | 0.01662208 | 0.10902149 |
| Katnbl1     | 2940.13486 | -0.4450175 | 0.19239995 | -2.3129813 | 0.02072366 | 0.12677959 |
| Polk        | 2255.84865 | -0.445165  | 0.22163161 | -2.008581  | 0.04458159 | 0.20438924 |
| Hyls1       | 2329.78377 | -0.4452175 | 0.19030699 | -2.3394702 | 0.01931111 | 0.12075076 |
| BC018242    | 210.276234 | -0.4455335 | 0.29854341 | -1.4923574 | 0.13560548 | 0.39328705 |

|             |            |            |            |            |            |            |
|-------------|------------|------------|------------|------------|------------|------------|
| Srfbp1      | 3514.45203 | -0.4455648 | 0.16107466 | -2.7662006 | 0.00567136 | 0.05169718 |
| Mapk3       | 3118.83672 | -0.4455691 | 0.19774614 | -2.253238  | 0.02424415 | 0.13982331 |
| Dennd4c     | 2226.09785 | -0.44573   | 0.26358629 | -1.691021  | 0.09083279 | 0.31378    |
| Hnrnpa3     | 3568.09863 | -0.4457317 | 0.23523235 | -1.8948569 | 0.05811136 | 0.24098394 |
| Usp30       | 1410.91745 | -0.4457526 | 0.24531517 | -1.8170608 | 0.06920781 | 0.26772403 |
| Glt28d2     | 11.4793385 | -0.4457814 | 0.43227169 | -1.0312528 | 0.30242227 | 0.5977337  |
| Fndc4       | 185.845979 | -0.4457949 | 0.28908464 | -1.5420913 | 0.12305141 | 0.37447602 |
| Rlim        | 6218.75748 | -0.4458644 | 0.27748472 | -1.6068071 | 0.10809669 | 0.34731645 |
| Lgals8      | 724.525068 | -0.4459406 | 0.24565311 | -1.8153266 | 0.06947373 | 0.26821738 |
| Ly6g6e      | 1710.0391  | -0.4459706 | 0.36032164 | -1.2377014 | 0.21582679 | 0.50281353 |
| Pm20d2      | 694.845057 | -0.4459998 | 0.26067573 | -1.7109371 | 0.08709273 | 0.30690664 |
| Fanci       | 9151.69746 | -0.4460571 | 0.18660575 | -2.3903715 | 0.01683134 | 0.10993033 |
| Them7       | 4.15984128 | -0.4465233 | 0.38171298 | -1.1697881 | 0.24208626 | NA         |
| Cep192      | 12355.0256 | -0.4466016 | 0.20289823 | -2.2011115 | 0.02772813 | 0.15193025 |
| Nup155      | 15191.3883 | -0.4468143 | 0.1652929  | -2.703167  | 0.00686822 | 0.05917376 |
| Mylip       | 1130.13733 | -0.4470207 | 0.20098609 | -2.2241376 | 0.02613919 | 0.14621961 |
| Sgtb        | 517.289164 | -0.4473794 | 0.29368909 | -1.5233094 | 0.1276813  | 0.38169396 |
| Slc22a5     | 697.598623 | -0.4474182 | 0.24111776 | -1.8556006 | 0.06351051 | 0.25481218 |
| Peg3        | 2969.66032 | -0.4475711 | 0.42811422 | -1.045448  | 0.29581597 | 0.59051371 |
| Sash1       | 5936.53342 | -0.4476139 | 0.26654366 | -1.6793267 | 0.09308839 | 0.31752214 |
| Zp1         | 4.74622375 | -0.4478265 | 0.3403895  | -1.3156296 | 0.18829841 | NA         |
| Eif4a1      | 112193.369 | -0.4479585 | 0.15979804 | -2.8032788 | 0.00505859 | 0.04743073 |
| Chic1       | 1617.30465 | -0.447968  | 0.24637575 | -1.8182311 | 0.06902883 | 0.26716458 |
| Clip3       | 405.211389 | -0.448167  | 0.30724971 | -1.458641  | 0.14466393 | 0.40736725 |
| Ehbp1       | 1700.26868 | -0.4484213 | 0.1587256  | -2.8251354 | 0.00472606 | 0.04510592 |
| Prr14l      | 6484.7296  | -0.448692  | 0.21532775 | -2.083763  | 0.03718173 | 0.18280529 |
| Rgs17       | 7.0915858  | -0.4487024 | 0.4144473  | -1.0826525 | 0.27896269 | 0.5713085  |
| Ythdc2      | 2177.71886 | -0.4490909 | 0.25793207 | -1.7411209 | 0.08166238 | 0.29540165 |
| Nipsnap3b   | 2612.052   | -0.4491125 | 0.1776661  | -2.527846  | 0.01147647 | 0.08472551 |
| Malt1       | 1508.03578 | -0.4492705 | 0.17558626 | -2.5586883 | 0.01050679 | 0.07998991 |
| Hnrnpul1    | 11506.3942 | -0.44936   | 0.19608852 | -2.2916183 | 0.02192768 | 0.13110241 |
| Gpd1l       | 4327.59437 | -0.4493952 | 0.18074133 | -2.4863998 | 0.01290429 | 0.09142351 |
| Arsa        | 1239.28285 | -0.4494238 | 0.25248136 | -1.7800277 | 0.07507143 | 0.28025934 |
| Znrd1as     | 855.542884 | -0.4495624 | 0.22933863 | -1.9602559 | 0.04996588 | 0.21956082 |
| Dhodh       | 2634.96761 | -0.4496673 | 0.20635256 | -2.1791213 | 0.02932266 | 0.15701257 |
| Tcf3        | 9356.44011 | -0.4496703 | 0.19347292 | -2.3242027 | 0.02011463 | 0.12457295 |
| 1700008I05R | 63.278135  | -0.4498148 | 0.42714929 | -1.0530622 | NA         | NA         |
| Ybx3        | 20005.2827 | -0.4500283 | 0.19675043 | -2.287305  | 0.02217802 | 0.13209133 |
| Mtm1        | 2458.73389 | -0.4500332 | 0.20266856 | -2.2205381 | 0.02638227 | 0.14678734 |
| Hdac11      | 618.494356 | -0.4500904 | 0.26723029 | -1.6842793 | 0.0921277  | 0.3161216  |
| Chd2        | 8123.05712 | -0.4502015 | 0.20035236 | -2.2470487 | 0.02463691 | 0.14132374 |

|             |            |            |            |            |            |            |
|-------------|------------|------------|------------|------------|------------|------------|
| Exoc1       | 3170.38736 | -0.4502314 | 0.17809004 | -2.528111  | 0.01146781 | 0.08472551 |
| Ncapd2      | 17704.6244 | -0.4502549 | 0.22544106 | -1.9972181 | 0.0458015  | 0.20789817 |
| Zfp932      | 953.957462 | -0.4503861 | 0.19928809 | -2.2599749 | 0.02382281 | 0.13828612 |
| Pnpla3      | 1763.86574 | -0.450556  | 0.23106411 | -1.9499175 | 0.05118595 | 0.2227176  |
| Inpp5d      | 10357.2579 | -0.4505797 | 0.2296726  | -1.9618347 | 0.04978174 | 0.21905936 |
| Cflar       | 148.463889 | -0.4505973 | 0.34611685 | -1.3018647 | 0.19296265 | 0.47563199 |
| Rasa2       | 1165.9597  | -0.4506406 | 0.2303087  | -1.9566806 | 0.05038503 | 0.2207437  |
| Ces2b       | 7.88580286 | -0.4506964 | 0.39932834 | -1.1286361 | 0.25905138 | 0.55124631 |
| Slc13a3     | 2.53482544 | -0.451044  | 0.33795635 | -1.334622  | 0.18200008 | NA         |
| Ints10      | 7258.47263 | -0.4511849 | 0.16196193 | -2.7857466 | 0.00534046 | 0.04952265 |
| 5830415F09F | 989.834734 | -0.451476  | 0.17995301 | -2.5088548 | 0.01211233 | 0.08797702 |
| Arhgap12    | 6239.69342 | -0.4515274 | 0.18756831 | -2.4072692 | 0.01607232 | 0.10644831 |
| Got1l1      | 1085.27937 | -0.4516172 | 0.32335331 | -1.3966679 | 0.16251348 | 0.43388979 |
| Nrros       | 241.440658 | -0.451715  | 0.27235003 | -1.6585826 | 0.09719993 | 0.32597718 |
| Fam221b     | 2.98588638 | -0.4517582 | 0.35006495 | -1.2904981 | 0.19687776 | NA         |
| Ufl1        | 4282.28981 | -0.4517932 | 0.18213785 | -2.4805013 | 0.01311978 | 0.09256078 |
| Tmem98      | 214.701399 | -0.4518584 | 0.24951893 | -1.8109182 | 0.07015352 | 0.26968196 |
| Kcnn4       | 6.58356333 | -0.4519057 | 0.42053994 | -1.0745845 | 0.28256078 | 0.57490302 |
| Tcf4        | 3455.97194 | -0.4520174 | 0.25272103 | -1.7886021 | 0.07367892 | 0.27716036 |
| Mitf        | 5146.94008 | -0.4520631 | 0.26902037 | -1.6804048 | 0.09287857 | 0.31723143 |
| Stk24       | 5650.15619 | -0.4520938 | 0.2292814  | -1.9717859 | 0.04863405 | 0.21577978 |
| Mafg        | 2276.86085 | -0.4523931 | 0.22719956 | -1.9911708 | 0.04646211 | 0.20973362 |
| Emc10       | 4240.44085 | -0.4524934 | 0.17374569 | -2.6043434 | 0.00920505 | 0.07303454 |
| Sqle        | 9666.2138  | -0.4526582 | 0.15773638 | -2.8697133 | 0.00410844 | 0.04053958 |
| Zfp114      | 27.6786633 | -0.4528861 | 0.40516399 | -1.1177847 | 0.26365894 | 0.55541671 |
| Dguok       | 1073.1699  | -0.4529202 | 0.20786701 | -2.1788939 | 0.02933955 | 0.15701257 |
| Psca        | 5.95717633 | -0.4529457 | 0.41221769 | -1.0988022 | 0.27185434 | 0.56527591 |
| Fhl4        | 132.349847 | -0.4529935 | 0.35762583 | -1.2666688 | 0.20527374 | 0.4903111  |
| Mau2        | 4577.02412 | -0.4531258 | 0.20361909 | -2.2253601 | 0.02605707 | 0.14612821 |
| Ccsap       | 665.228857 | -0.4532956 | 0.17447578 | -2.5980429 | 0.00937568 | 0.0738794  |
| Med1        | 6415.52895 | -0.4533478 | 0.27933668 | -1.6229442 | 0.10460134 | 0.33994888 |
| Fam135a     | 2064.39116 | -0.453404  | 0.21950074 | -2.0656149 | 0.03886486 | 0.18832092 |
| Mast3       | 1359.99922 | -0.4534167 | 0.24844229 | -1.8250382 | 0.06799526 | 0.26474569 |
| Il20ra      | 10.2269556 | -0.4534306 | 0.35302423 | -1.2844178 | NA         | NA         |
| Qser1       | 3670.58143 | -0.4535121 | 0.27512036 | -1.6484135 | 0.09926786 | 0.32971261 |
| Rnaseh2b    | 8616.12902 | -0.4537225 | 0.20763183 | -2.1852259 | 0.02887229 | 0.15582582 |
| Hcn3        | 175.117138 | -0.453832  | 0.26349169 | -1.7223769 | 0.08500126 | 0.30227639 |
| Zfp934      | 572.567001 | -0.4539097 | 0.34160577 | -1.328753  | 0.18392948 | 0.46440776 |
| Zfp952      | 1128.11929 | -0.4539121 | 0.17988265 | -2.5233791 | 0.0116233  | 0.08534182 |
| Aurka       | 9304.28386 | -0.4539993 | 0.21764385 | -2.0859734 | 0.03698104 | 0.18247163 |
| Cyp2f2      | 6.52553762 | -0.4541255 | 0.37864851 | -1.1993325 | 0.23039867 | 0.52183654 |

|             |            |            |            |            |            |            |
|-------------|------------|------------|------------|------------|------------|------------|
| Aqp11       | 249.287947 | -0.4541269 | 0.29306517 | -1.5495765 | 0.1212432  | 0.37070775 |
| Gm11426     | 7.69458094 | -0.4541382 | 0.41359126 | -1.0980363 | 0.27218866 | 0.56560113 |
| Batf2       | 31.394885  | -0.4543368 | 0.39150971 | -1.1604739 | 0.24585592 | 0.53902516 |
| Pdyn        | 9.26699309 | -0.4543802 | 0.41823084 | -1.0864339 | 0.27728706 | 0.56955371 |
| Slc11a2     | 2312.23066 | -0.4545774 | 0.24673891 | -1.8423418 | 0.06542517 | 0.25921701 |
| Ranbp2      | 18947.9325 | -0.4548048 | 0.22526291 | -2.0189954 | 0.04348769 | 0.2012024  |
| Kcnh4       | 21.7578151 | -0.4548158 | 0.43190017 | -1.0530578 | 0.29231451 | 0.58609887 |
| Stk39       | 272.336987 | -0.4549021 | 0.35132785 | -1.2948081 | 0.19538644 | 0.47812031 |
| Ptprj       | 2168.40897 | -0.4551112 | 0.21561733 | -2.1107357 | 0.03479503 | 0.17581822 |
| Grm4        | 62.4767482 | -0.4551551 | 0.38464541 | -1.1833109 | 0.23668595 | 0.52845704 |
| Atp8b2      | 5669.28577 | -0.4554572 | 0.30963332 | -1.4709568 | 0.1413028  | 0.40171844 |
| Pcbp3       | 707.358474 | -0.4555471 | 0.19162696 | -2.37726   | 0.01744179 | 0.11268684 |
| Sec23a      | 12134.973  | -0.4555664 | 0.15430276 | -2.9524193 | 0.00315294 | 0.03390833 |
| Mars        | 15117.6324 | -0.4556684 | 0.17983316 | -2.53384   | 0.01128202 | 0.083927   |
| Plin5       | 58.7873501 | -0.4556854 | 0.34479402 | -1.3216163 | 0.18629594 | 0.46712159 |
| Fgfr11      | 844.149416 | -0.4558412 | 0.27845468 | -1.6370389 | 0.10162233 | 0.33481545 |
| Gk5         | 1411.81452 | -0.4558809 | 0.26064643 | -1.7490393 | 0.08028422 | 0.29214885 |
| Fam60a      | 1755.40019 | -0.4561847 | 0.15061052 | -3.0289032 | 0.00245443 | 0.0282618  |
| Tjp1        | 10442.9948 | -0.456864  | 0.23708486 | -1.9270062 | 0.05397886 | 0.23016871 |
| Mier2       | 2106.83776 | -0.4569342 | 0.16754066 | -2.7273035 | 0.00638543 | 0.05613328 |
| Bdkrb2      | 47.4074313 | -0.4571464 | 0.3824267  | -1.1953832 | 0.23193736 | 0.52341574 |
| Nob1        | 5497.90407 | -0.4573673 | 0.23159048 | -1.9748969 | 0.04827985 | 0.21506529 |
| Spidr       | 4564.88327 | -0.4574288 | 0.21803474 | -2.0979627 | 0.03590844 | 0.17978499 |
| Dnaaf1      | 48.6104999 | -0.4575497 | 0.38693618 | -1.182494  | 0.23700976 | 0.52909706 |
| 1700066M21  | 1242.63981 | -0.4576922 | 0.16549701 | -2.7655619 | 0.00568248 | 0.05173787 |
| 4632434111R | 4676.75012 | -0.4577958 | 0.19439379 | -2.3549917 | 0.01852312 | 0.11733675 |
| Slc47a2     | 129.794776 | -0.4579429 | 0.29270973 | -1.5644949 | 0.11770139 | 0.3642587  |
| Gm5086      | 17.12916   | -0.4580689 | 0.43205596 | -1.0602074 | 0.28905024 | 0.58221217 |
| Spata24     | 369.196987 | -0.4581203 | 0.27590068 | -1.6604537 | 0.09682321 | 0.32510718 |
| Tmtc4       | 1961.27022 | -0.45836   | 0.18395844 | -2.4916497 | 0.01271514 | 0.09048042 |
| Lsm6        | 3380.40219 | -0.4584545 | 0.21796204 | -2.1033686 | 0.03543356 | 0.1782683  |
| BC005764    | 44.3007895 | -0.4587923 | 0.36001824 | -1.2743586 | 0.20253635 | 0.487284   |
| Pon3        | 132.834132 | -0.459059  | 0.4304122  | -1.0665566 | NA         | NA         |
| Rpl11       | 37491.3732 | -0.4592385 | 0.21691486 | -2.117137  | 0.03424822 | 0.17370974 |
| D3Ertd254e  | 2491.60049 | -0.4592996 | 0.19624924 | -2.3403894 | 0.01926365 | 0.12064798 |
| Gm572       | 6.86709023 | -0.4593556 | 0.41838438 | -1.0979273 | 0.27223623 | 0.56560396 |
| Dync1i2     | 9082.17351 | -0.459392  | 0.14092659 | -3.2597966 | 0.00111492 | 0.01584839 |
| Nudt21      | 1191.52442 | -0.460045  | 0.21624459 | -2.127429  | 0.03338445 | 0.17094555 |
| Srebf2      | 16275.172  | -0.4601859 | 0.19652674 | -2.3415942 | 0.01920158 | 0.12040476 |
| Rpl12       | 114485.776 | -0.4603499 | 0.21006784 | -2.1914345 | 0.02842037 | 0.15447924 |
| Mgrn1       | 4959.6824  | -0.4604631 | 0.21717213 | -2.1202678 | 0.03398347 | 0.17298753 |

|             |            |            |            |            |            |            |
|-------------|------------|------------|------------|------------|------------|------------|
| Cntnap2     | 399.725026 | -0.4609759 | 0.35851841 | -1.2857802 | 0.19851978 | 0.48154439 |
| Zfp788      | 1324.5005  | -0.4610035 | 0.1832553  | -2.5156354 | 0.0118818  | 0.08670295 |
| Zfp280d     | 3551.32275 | -0.4610521 | 0.21083165 | -2.1868257 | 0.02875525 | 0.15543015 |
| Zscan26     | 4042.8716  | -0.461058  | 0.16127953 | -2.8587507 | 0.00425313 | 0.04157159 |
| A4galt      | 4630.17229 | -0.4611978 | 0.25461661 | -1.811342  | 0.07008793 | 0.26958628 |
| Yars        | 11444.786  | -0.4612089 | 0.17070117 | -2.7018495 | 0.0068955  | 0.05934248 |
| Ptpn6       | 2540.56639 | -0.4612876 | 0.19941097 | -2.3132508 | 0.02070886 | 0.12673885 |
| Zfp608      | 20.0260469 | -0.461423  | 0.43210899 | -1.0678394 | 0.28559298 | 0.57853274 |
| Tnik        | 364.719861 | -0.4617724 | 0.28039118 | -1.6468863 | 0.09958141 | 0.33006978 |
| B230219D22l | 6132.99614 | -0.4618253 | 0.21091948 | -2.1895809 | 0.02855464 | 0.1549824  |
| Actl6a      | 18143.8899 | -0.462131  | 0.15886244 | -2.909001  | 0.00362586 | 0.03735909 |
| Gm13032     | 29.7916312 | -0.4621949 | 0.41146328 | -1.1232956 | 0.26131197 | 0.5536198  |
| Usp10       | 11556.3181 | -0.4622317 | 0.22695766 | -2.0366427 | 0.04168586 | 0.19578884 |
| Zfp7        | 6278.34445 | -0.4622318 | 0.18035965 | -2.5628336 | 0.01038218 | 0.07945536 |
| Myh7b       | 2186.94189 | -0.4622489 | 0.20211952 | -2.2870079 | 0.02219536 | 0.1320934  |
| Mynn        | 3637.04744 | -0.4622611 | 0.16889888 | -2.7369102 | 0.00620192 | 0.05486126 |
| Ubtf        | 19681.2002 | -0.4625408 | 0.16235014 | -2.8490325 | 0.00438524 | 0.04251551 |
| Mpc1        | 739.024387 | -0.462663  | 0.23843651 | -1.9404033 | 0.0523307  | 0.22611689 |
| Abhd13      | 2790.12788 | -0.4628973 | 0.21451516 | -2.1578767 | 0.03093742 | 0.1626463  |
| Npas2       | 91.1034933 | -0.4632181 | 0.35952936 | -1.2884013 | 0.19760631 | 0.48086773 |
| Hmgxb4      | 5104.28762 | -0.4640939 | 0.26928768 | -1.723413  | 0.08481387 | 0.30207154 |
| Gm15091     | 33.9511694 | -0.4641055 | 0.43176785 | -1.074896  | 0.28242129 | 0.57481886 |
| Klhl17      | 881.522639 | -0.4641861 | 0.22345743 | -2.0772908 | 0.03777472 | 0.18496056 |
| Sv2c        | 41.7893151 | -0.4642219 | 0.432238   | -1.0739959 | NA         | NA         |
| 2610034M16  | 28.3959412 | -0.4644715 | 0.41265347 | -1.1255727 | 0.26034645 | 0.5523497  |
| Slc2a7      | 127.168465 | -0.4648446 | 0.33721983 | -1.3784617 | 0.16806079 | 0.44308872 |
| Taok3       | 737.414736 | -0.4649455 | 0.28335029 | -1.6408859 | 0.1008211  | 0.33279315 |
| Zfp235      | 446.39957  | -0.4649688 | 0.22958191 | -2.025285  | 0.04283811 | 0.19951344 |
| Plag1       | 608.16086  | -0.4651071 | 0.27372018 | -1.6992066 | 0.08928026 | 0.31102091 |
| Clec12a     | 4.82886467 | -0.4651852 | 0.30895052 | -1.505695  | 0.1321455  | NA         |
| Aox2        | 14.0122073 | -0.465246  | 0.4309768  | -1.0795153 | 0.28035808 | 0.57238395 |
| Zfp322a     | 3446.31488 | -0.4655682 | 0.19492539 | -2.3884432 | 0.01691992 | 0.11018498 |
| Gzf1        | 2696.50994 | -0.4656167 | 0.17535035 | -2.6553507 | 0.0079226  | 0.06595522 |
| Zfp930      | 3558.05281 | -0.4656196 | 0.2002686  | -2.3249758 | 0.02007325 | 0.1243662  |
| Lonrf1      | 2682.93708 | -0.4656487 | 0.2562868  | -1.8169049 | 0.06923168 | 0.26774978 |
| Rpl3l       | 166.083713 | -0.465748  | 0.31206737 | -1.4924598 | 0.13557865 | 0.39328705 |
| Stil        | 2310.51441 | -0.4657933 | 0.16148643 | -2.8844112 | 0.00392146 | 0.03944545 |
| Btbd2       | 3709.4181  | -0.4663339 | 0.24409667 | -1.9104475 | 0.05607562 | 0.23581177 |
| Fam221a     | 373.307826 | -0.4670443 | 0.3347409  | -1.3952411 | 0.16294314 | 0.43463615 |
| Pou3f1      | 105.840853 | -0.4671192 | 0.41729493 | -1.1193982 | 0.26297029 | 0.55517933 |
| Pcbp4       | 3527.37888 | -0.4672305 | 0.22300974 | -2.0951123 | 0.03616101 | 0.18049079 |



|             |            |            |            |            |            |            |
|-------------|------------|------------|------------|------------|------------|------------|
| Oas1f       | 22.8622529 | -0.4672839 | 0.39158383 | -1.1933178 | NA         | NA         |
| Dnd1        | 502.340813 | -0.4674643 | 0.20680554 | -2.2604052 | 0.02379611 | 0.13819502 |
| Gngt2       | 155.465643 | -0.4675995 | 0.3288302  | -1.4220091 | 0.1550236  | 0.4237087  |
| Adam32      | 78.4578567 | -0.4676039 | 0.38054128 | -1.2287863 | 0.21915192 | 0.50767638 |
| Slc7a14     | 7.22112317 | -0.4676833 | 0.41413113 | -1.1293122 | 0.25876618 | 0.55112352 |
| Asnsd1      | 7884.03524 | -0.4677001 | 0.16334566 | -2.863254  | 0.00419314 | 0.0410627  |
| Igsf8       | 1577.58243 | -0.4678781 | 0.22014647 | -2.1253039 | 0.03356126 | 0.17145573 |
| A730090N16  | 14.4935844 | -0.4679976 | 0.42757144 | -1.0945483 | 0.27371456 | 0.56667239 |
| Rwdd3       | 253.964326 | -0.4680703 | 0.34725559 | -1.347913  | 0.17768638 | 0.45514757 |
| Dnaic1      | 74.7291565 | -0.4686491 | 0.34565704 | -1.3558211 | 0.17515611 | 0.45309298 |
| Sipa1l2     | 4948.50982 | -0.4687033 | 0.27052031 | -1.7325993 | 0.08316691 | 0.2988278  |
| Mpp3        | 32.7967233 | -0.4688466 | 0.41471303 | -1.1305327 | 0.25825183 | 0.55088501 |
| Slco2b1     | 9.5118142  | -0.4690199 | 0.40198096 | -1.1667714 | 0.24330271 | 0.53577799 |
| Anp32e      | 19038.0485 | -0.4690504 | 0.14806606 | -3.1678455 | 0.00153573 | 0.01986868 |
| Gga3        | 3374.63966 | -0.4691154 | 0.20923759 | -2.2420227 | 0.02495991 | 0.14236991 |
| Rgs7        | 6.90148398 | -0.4691995 | 0.415462   | -1.1293439 | 0.2587528  | 0.55112352 |
| Terf1       | 15200.8122 | -0.4693171 | 0.18591321 | -2.5243883 | 0.01158998 | 0.08517762 |
| Pkp2        | 2039.82874 | -0.4694058 | 0.28165014 | -1.6666273 | 0.09558854 | 0.32308136 |
| A330069E16f | 44.3606959 | -0.4695772 | 0.37734069 | -1.2444382 | 0.21333832 | 0.5002449  |
| Sp1         | 16927.0818 | -0.4695986 | 0.1883694  | -2.4929663 | 0.01266809 | 0.09038692 |
| Oplah       | 507.993453 | -0.4697114 | 0.39897894 | -1.1772837 | 0.23908229 | 0.53111297 |
| Atf7ip2     | 1231.91117 | -0.4697732 | 0.2226253  | -2.1101519 | 0.03484527 | 0.17599183 |
| Zdhhc20     | 4086.89184 | -0.4698683 | 0.1894554  | -2.4800996 | 0.01313457 | 0.09256078 |
| S1pr4       | 45.3487459 | -0.4698893 | 0.3806961  | -1.2342897 | 0.21709498 | 0.50464037 |
| Flna        | 24683.9152 | -0.4700518 | 0.26551418 | -1.7703454 | 0.07666962 | 0.28423856 |
| Fbxo31      | 1811.65138 | -0.4702692 | 0.22387942 | -2.1005469 | 0.03568076 | 0.17900288 |
| Zfyve20     | 2681.39732 | -0.47032   | 0.22848105 | -2.0584638 | 0.03954563 | 0.18991988 |
| Pex7        | 2435.66449 | -0.4706833 | 0.2408717  | -1.954083  | 0.0506914  | 0.22137095 |
| Zkscan8     | 1878.74368 | -0.4707705 | 0.22240695 | -2.1167076 | 0.03428467 | 0.17378125 |
| Usp43       | 553.584183 | -0.4708525 | 0.33158789 | -1.419993  | 0.15560973 | 0.42424385 |
| Nasp        | 64875.8715 | -0.4708724 | 0.17612765 | -2.6734721 | 0.00750705 | 0.06327488 |
| Sf3b1       | 38811.2013 | -0.4710078 | 0.16528223 | -2.8497185 | 0.00437579 | 0.04245039 |
| E130008D07f | 15.6234092 | -0.4712668 | 0.43060869 | -1.09442   | 0.2737708  | 0.56667239 |
| Ankrd24     | 903.803558 | -0.4716581 | 0.18605967 | -2.5349829 | 0.01124528 | 0.08375258 |
| Snord95     | 57.9017048 | -0.4717594 | 0.37760969 | -1.2493307 | 0.21154415 | 0.49812885 |
| Tnfrsf17    | 4.37897588 | -0.4719235 | 0.37945012 | -1.2437038 | 0.21360861 | NA         |
| Enah        | 23719.5364 | -0.4720097 | 0.17427992 | -2.7083424 | 0.00676202 | 0.05862142 |
| Dmtf1       | 6304.29678 | -0.4720539 | 0.17468599 | -2.7022998 | 0.00688616 | 0.05929497 |
| Atad2       | 14756.1855 | -0.4721037 | 0.20679161 | -2.2829926 | 0.02243081 | 0.13303641 |
| Rpl32       | 70545.6651 | -0.4721976 | 0.20825377 | -2.2674147 | 0.02336491 | 0.13649424 |
| Klhl33      | 2.70206254 | -0.4722309 | 0.34199932 | -1.380795  | 0.16734201 | NA         |

|             |            |            |            |            |            |            |
|-------------|------------|------------|------------|------------|------------|------------|
| Dennd4a     | 1340.5267  | -0.472233  | 0.22065422 | -2.1401493 | 0.03234271 | 0.16754211 |
| Glod5       | 307.36707  | -0.472306  | 0.40205372 | -1.1747336 | 0.24010131 | 0.53226165 |
| Eif2a       | 15267.4831 | -0.4723273 | 0.15250503 | -3.097126  | 0.00195407 | 0.02402191 |
| Fancl       | 3422.87836 | -0.4723283 | 0.23704514 | -1.9925669 | 0.04630889 | 0.20916339 |
| Nubp1       | 3972.19954 | -0.4724232 | 0.23569008 | -2.0044257 | 0.04502448 | 0.20563163 |
| St8sia1     | 1662.99753 | -0.4725959 | 0.42965103 | -1.0999528 | 0.27135269 | 0.56490036 |
| Nup62       | 13995.1009 | -0.4726827 | 0.19753021 | -2.3929642 | 0.01671287 | 0.10943237 |
| Pacs2       | 2330.49245 | -0.4729341 | 0.18922548 | -2.4993153 | 0.01244335 | 0.08933823 |
| Fam129b     | 4471.44176 | -0.4730676 | 0.22084399 | -2.1420894 | 0.03218629 | 0.16695431 |
| Kbtbd8      | 3869.9309  | -0.4732347 | 0.19304203 | -2.4514593 | 0.01422783 | 0.09803143 |
| Sstr2       | 256.352476 | -0.4732784 | 0.40078785 | -1.1808701 | 0.23765431 | 0.52993576 |
| Slc35f3     | 25.3565741 | -0.4733069 | 0.40098234 | -1.1803685 | 0.23785367 | 0.52993576 |
| Smc2        | 18848.7521 | -0.4737231 | 0.1901321  | -2.4915472 | 0.01271881 | 0.09048042 |
| Nfyb        | 7280.57927 | -0.474111  | 0.21392421 | -2.2162568 | 0.02667392 | 0.1479865  |
| Cep68       | 3312.81341 | -0.4741373 | 0.16374053 | -2.8956622 | 0.00378359 | 0.03835929 |
| Rit2        | 13.1803828 | -0.4744839 | 0.41502571 | -1.143264  | 0.25292901 | 0.54598821 |
| Smc1b       | 2655.01202 | -0.4745857 | 0.35608807 | -1.3327762 | 0.18260527 | 0.46234038 |
| Gm21283     | 1212.50592 | -0.4746998 | 0.28375657 | -1.672912  | 0.09434462 | 0.32012942 |
| Eif3a       | 55699.4796 | -0.4752043 | 0.16851393 | -2.8199704 | 0.00480281 | 0.04562521 |
| Knstrn      | 3425.42905 | -0.4753901 | 0.16320732 | -2.9127988 | 0.00358205 | 0.03704217 |
| Hrh2        | 17.3393021 | -0.4755791 | 0.4322565  | -1.1002244 | 0.27123437 | 0.56486131 |
| Asb16       | 104.257487 | -0.4756949 | 0.28162736 | -1.6890933 | 0.09120154 | 0.31447343 |
| Tmem87b     | 2260.78043 | -0.4757196 | 0.18823921 | -2.5272076 | 0.01149735 | 0.08475907 |
| Serpinb9b   | 447.629327 | -0.4757709 | 0.40816068 | -1.165646  | 0.24375759 | 0.53593585 |
| Scarb2      | 3184.22588 | -0.4758956 | 0.24429869 | -1.9480071 | 0.05141411 | 0.22314843 |
| Kpna2       | 14526.9411 | -0.4759053 | 0.14523348 | -3.2768287 | 0.0010498  | 0.01513016 |
| Snord16a    | 146.155737 | -0.475991  | 0.32127579 | -1.4815651 | 0.13845606 | 0.39777094 |
| 1810007D17I | 5.86660453 | -0.4764273 | 0.32741642 | -1.4551113 | 0.14563846 | NA         |
| Nf2         | 11034.9986 | -0.476507  | 0.23460982 | -2.0310616 | 0.04224875 | 0.19756905 |
| 4930447K03F | 10.6553776 | -0.4770294 | 0.42553924 | -1.1209998 | 0.26228793 | 0.55478597 |
| Prim1       | 7580.92789 | -0.4771564 | 0.15698601 | -3.0394836 | 0.00236984 | 0.02760554 |
| Dkc1        | 26048.4881 | -0.4771959 | 0.14890374 | -3.2047273 | 0.00135191 | 0.01817068 |
| Bend6       | 26.6501606 | -0.4773559 | 0.42228007 | -1.1304249 | 0.25829723 | 0.55088501 |
| Mrpl47      | 3715.53928 | -0.4774117 | 0.18083005 | -2.6401126 | 0.00828785 | 0.06826501 |
| Clic3       | 10.4034193 | -0.4774164 | 0.40845795 | -1.1688263 | 0.24247361 | 0.53472044 |
| Nars        | 33127.0106 | -0.4775179 | 0.14852827 | -3.2149966 | 0.00130446 | 0.01772972 |
| Gm10033     | 427.301271 | -0.4777301 | 0.2885258  | -1.6557621 | 0.09777001 | 0.32672602 |
| Reck        | 679.602238 | -0.4779266 | 0.25956772 | -1.8412406 | 0.0655863  | 0.25939598 |
| Gse1        | 4023.97206 | -0.4779846 | 0.25011042 | -1.9110943 | 0.05599247 | 0.23562434 |
| Nsl1        | 2297.43325 | -0.4780027 | 0.15967282 | -2.9936386 | 0.00275672 | 0.03075308 |
| Asic2       | 4.56554116 | -0.4784638 | 0.37825489 | -1.2649243 | 0.20589848 | NA         |

|             |            |            |            |            |            |            |
|-------------|------------|------------|------------|------------|------------|------------|
| Adam19      | 10654.7948 | -0.4790838 | 0.31222059 | -1.53444   | 0.12492143 | 0.37772763 |
| Inpp5j      | 156.567158 | -0.4792901 | 0.39748005 | -1.2058217 | 0.22788624 | 0.51833537 |
| Atl3        | 7045.05608 | -0.4793256 | 0.20679932 | -2.3178299 | 0.02045857 | 0.12575418 |
| Rad54b      | 3869.80912 | -0.4793707 | 0.18392189 | -2.606382  | 0.00915044 | 0.0727497  |
| Prc1        | 14056.4675 | -0.47955   | 0.20000849 | -2.3976484 | 0.0165007  | 0.10847658 |
| Nsmce4a     | 12501.842  | -0.4797604 | 0.17513554 | -2.7393663 | 0.00615577 | 0.05460836 |
| Mertk       | 158.744916 | -0.4798201 | 0.35190257 | -1.3635027 | 0.17272414 | 0.44977111 |
| Crebrf      | 2033.8192  | -0.4799456 | 0.2840912  | -1.6894067 | 0.09114152 | 0.31433615 |
| D430019H16  | 118.234407 | -0.4801532 | 0.38758312 | -1.2388394 | 0.21540498 | 0.50266549 |
| Gnaz        | 108.027624 | -0.4805256 | 0.36217809 | -1.326766  | 0.18458609 | 0.46455672 |
| Senp8       | 1111.66037 | -0.4805876 | 0.20808926 | -2.309526  | 0.02091441 | 0.12769534 |
| Slc14a1     | 6.53637965 | -0.4807164 | 0.39572831 | -1.2147638 | 0.2244562  | 0.51368924 |
| Arl4a       | 2130.3828  | -0.480743  | 0.2901586  | -1.6568284 | 0.09755417 | 0.32646114 |
| Ccdc60      | 21.7396477 | -0.4809965 | 0.42712878 | -1.126116  | 0.26011644 | 0.55222808 |
| Optn        | 553.064925 | -0.4812396 | 0.30985304 | -1.5531221 | 0.12039396 | 0.36920655 |
| Kctd2       | 1353.83023 | -0.4813388 | 0.24521438 | -1.9629305 | 0.04965425 | 0.21880795 |
| Thap2       | 233.929639 | -0.4814006 | 0.33509498 | -1.4366093 | 0.15082903 | 0.41765353 |
| Pou6f2      | 4.23907671 | -0.4814788 | 0.32727607 | -1.4711703 | 0.14124506 | NA         |
| Gstcd       | 1801.36762 | -0.4815483 | 0.19201668 | -2.5078463 | 0.01214695 | 0.08814616 |
| Ccnb1ip1    | 637.868235 | -0.4815616 | 0.40502076 | -1.1889801 | NA         | NA         |
| Akr1b7      | 21.9986701 | -0.4819083 | 0.43085612 | -1.1184901 | 0.26335773 | 0.55541671 |
| Mroh7       | 68.2047963 | -0.4821218 | 0.41825575 | -1.1526962 | 0.24903512 | 0.54240128 |
| Rangrf      | 1113.54549 | -0.4821413 | 0.21888478 | -2.2027174 | 0.02761467 | 0.15152991 |
| Crbn        | 3541.70621 | -0.4821487 | 0.16072165 | -2.999899  | 0.00270069 | 0.03028006 |
| Map2k7      | 4375.0887  | -0.4824368 | 0.23437157 | -2.0584271 | 0.03954916 | 0.18991988 |
| Atl2        | 5978.72072 | -0.4827656 | 0.16459602 | -2.9330335 | 0.00335668 | 0.03536564 |
| Hoxc4       | 310.018637 | -0.4828513 | 0.25409022 | -1.9003144 | 0.05739187 | 0.23881336 |
| 9330102E08F | 105.939327 | -0.4828846 | 0.38610375 | -1.2506602 | 0.21105848 | 0.49780377 |
| Pcolce      | 7045.19535 | -0.4830273 | 0.20987666 | -2.3014817 | 0.02136442 | 0.12925061 |
| Grm2        | 93.9789178 | -0.4832449 | 0.42544534 | -1.1358567 | 0.25601656 | 0.54884387 |
| Mvk         | 1548.82826 | -0.4832587 | 0.22008743 | -2.1957579 | 0.02810928 | 0.15332423 |
| Ap1m1       | 4014.08697 | -0.4833564 | 0.21351455 | -2.26381   | 0.0235858  | 0.13747482 |
| Exoc4       | 9052.73136 | -0.4833925 | 0.20967847 | -2.305399  | 0.02114423 | 0.12859479 |
| Wdr24       | 1508.03179 | -0.4834404 | 0.18639925 | -2.5935749 | 0.00949839 | 0.07456304 |
| Lysmd4      | 535.051484 | -0.4834689 | 0.23634018 | -2.0456482 | 0.04079099 | 0.1936198  |
| Fpgt        | 1366.27814 | -0.4835833 | 0.20870627 | -2.317052  | 0.0205009  | 0.12577215 |
| Tmed6       | 41.3512926 | -0.483603  | 0.4311272  | -1.1217177 | 0.26198251 | 0.55435932 |
| Tmem63c     | 122.21905  | -0.4836354 | 0.34235545 | -1.4126703 | 0.15775268 | 0.42767192 |
| Cldn3       | 245.522289 | -0.484022  | 0.30282962 | -1.5983311 | 0.10996932 | 0.35043706 |
| Ppm1k       | 660.827759 | -0.4842995 | 0.23689178 | -2.0443916 | 0.04091488 | 0.19380667 |
| Zfp12       | 1303.09384 | -0.4843005 | 0.2046664  | -2.3662924 | 0.01796725 | 0.11512514 |

|             |            |            |            |            |            |            |
|-------------|------------|------------|------------|------------|------------|------------|
| Sun1        | 12929.9302 | -0.4843769 | 0.16830101 | -2.8780393 | 0.00400155 | 0.03991543 |
| 1700016D06l | 230.485627 | -0.4844228 | 0.3676374  | -1.3176645 | 0.18761597 | 0.46899469 |
| Lrrc45      | 1201.89065 | -0.4845089 | 0.25608156 | -1.8920101 | 0.05848964 | 0.24189476 |
| Gnat1       | 38.5025192 | -0.4847992 | 0.42167317 | -1.1497036 | 0.25026598 | 0.54397659 |
| Ube2c       | 12482.5394 | -0.4850619 | 0.17808391 | -2.7237828 | 0.00645389 | 0.05647975 |
| Hist1h3g    | 11.2221411 | -0.4852411 | 0.43098628 | -1.1258852 | 0.26021411 | 0.55228465 |
| Zfp266      | 4192.90206 | -0.4853806 | 0.1598671  | -3.0361504 | 0.0023962  | 0.02786066 |
| Nme4        | 3556.53705 | -0.4853876 | 0.15677233 | -3.0961307 | 0.00196064 | 0.02408365 |
| Cdc25c      | 2013.43559 | -0.4855486 | 0.17504526 | -2.7738461 | 0.00553979 | 0.05094574 |
| Mlph        | 53.506788  | -0.4858839 | 0.43203592 | -1.1246377 | 0.26074257 | 0.55280269 |
| Ramp3       | 30.309973  | -0.4860534 | 0.42198299 | -1.1518317 | 0.24939023 | 0.54295595 |
| BC002163    | 1147.14408 | -0.4862183 | 0.27785193 | -1.7499189 | 0.08013231 | 0.29197223 |
| Gpx2-ps1    | 14.3684277 | -0.4862391 | 0.4266827  | -1.13958   | 0.25446133 | 0.5476236  |
| Mgat4a      | 895.344386 | -0.4865048 | 0.26206253 | -1.8564454 | 0.0633901  | 0.25452606 |
| Lamp2       | 11648.2239 | -0.4865283 | 0.23878671 | -2.0375017 | 0.04159979 | 0.19562866 |
| Tmem242     | 2110.78295 | -0.486606  | 0.22237872 | -2.1881858 | 0.02865607 | 0.15527195 |
| Lman1       | 12880.0913 | -0.4866892 | 0.1699287  | -2.8640786 | 0.00418224 | 0.0410076  |
| Fam69c      | 5.89518285 | -0.4868594 | 0.35030865 | -1.3898013 | 0.16458923 | NA         |
| Lrig1       | 2422.98361 | -0.4871263 | 0.18434538 | -2.6424656 | 0.00823048 | 0.0679215  |
| Stoml2      | 11015.4105 | -0.4876375 | 0.18717986 | -2.6051815 | 0.00918256 | 0.07289331 |
| Rad51b      | 594.178493 | -0.4877334 | 0.25526539 | -1.9106916 | 0.05604422 | 0.2357435  |
| Snora81     | 380.700891 | -0.4879258 | 0.32108915 | -1.519596  | 0.12861254 | 0.38300529 |
| Taok1       | 7303.74911 | -0.487954  | 0.2568192  | -1.8999904 | 0.05743437 | 0.23881336 |
| Slc35a3     | 1952.52344 | -0.4880227 | 0.24702405 | -1.9756079 | 0.04819921 | 0.21483115 |
| Cnr2        | 4.08040254 | -0.4884897 | 0.34636766 | -1.4103213 | 0.15844483 | NA         |
| Tmem209     | 7251.24318 | -0.4886049 | 0.18124007 | -2.6958989 | 0.0070199  | 0.06014678 |
| Cyp1a1      | 80.1415821 | -0.4886091 | 0.43128547 | -1.1329135 | 0.25725057 | 0.55006377 |
| Rps18       | 50780.7618 | -0.4886127 | 0.22130273 | -2.2078927 | 0.02725175 | 0.15012116 |
| Abca2       | 1620.24774 | -0.4886302 | 0.2120687  | -2.304113  | 0.0212163  | 0.12888076 |
| Flt1        | 31.174759  | -0.4888456 | 0.43116097 | -1.133789  | 0.25688308 | 0.54993313 |
| Herpud1     | 1523.94171 | -0.4891283 | 0.18249648 | -2.6802064 | 0.00735768 | 0.06221818 |
| Lars        | 24343.1555 | -0.4893894 | 0.17060077 | -2.8686237 | 0.00412262 | 0.04060219 |
| Esf1        | 7770.25334 | -0.4898677 | 0.18741185 | -2.6138564 | 0.00895266 | 0.07161671 |
| Fam210a     | 3596.63694 | -0.4900401 | 0.19130024 | -2.5616283 | 0.01041827 | 0.07965319 |
| Prss45      | 47.3666283 | -0.4900475 | 0.43031243 | -1.1388179 | 0.25477912 | 0.54792838 |
| Cep55       | 11369.9024 | -0.4901318 | 0.16108638 | -3.0426644 | 0.00234494 | 0.02735642 |
| Trmt11      | 1980.49128 | -0.4906684 | 0.18960885 | -2.5877926 | 0.00965931 | 0.07552918 |
| Ccl25       | 1616.16389 | -0.4909716 | 0.43158677 | -1.1375965 | NA         | NA         |
| Igf1        | 6.19391884 | -0.4912003 | 0.38282168 | -1.2831047 | 0.19945541 | 0.48250548 |
| Blvrb       | 3065.46499 | -0.4914052 | 0.27567597 | -1.7825464 | 0.07466017 | 0.27936486 |
| Aasdh       | 1019.78957 | -0.4915281 | 0.21549449 | -2.280931  | 0.02255253 | 0.13360548 |

|          |            |            |            |            |            |            |
|----------|------------|------------|------------|------------|------------|------------|
| D2Wsu81e | 3791.54724 | -0.4915695 | 0.23069756 | -2.1307963 | 0.03310592 | 0.16985491 |
| Pla2g3   | 22.0796721 | -0.4915767 | 0.42992405 | -1.1434035 | 0.25287109 | 0.54598821 |
| Nek1     | 2060.89113 | -0.4917062 | 0.23090589 | -2.1294658 | 0.03321574 | 0.17024982 |
| Map3k8   | 260.159033 | -0.4917111 | 0.32054908 | -1.533965  | 0.12503826 | 0.3779339  |
| Eif3m    | 15554.1425 | -0.4918218 | 0.17141568 | -2.8691765 | 0.00411542 | 0.04055697 |
| Prkra    | 1092.50779 | -0.4918948 | 0.25901671 | -1.8990852 | 0.05755328 | 0.23924379 |
| Sgcb     | 266.046686 | -0.4920313 | 0.25881585 | -1.9010866 | 0.05729067 | 0.23872648 |
| Pole2    | 3665.98764 | -0.4922447 | 0.16786736 | -2.9323432 | 0.00336415 | 0.03539638 |
| Tnfrsf1b | 1552.4228  | -0.4925425 | 0.22154787 | -2.2231876 | 0.02620315 | 0.14641014 |
| Sestd1   | 1543.82532 | -0.4927346 | 0.2578372  | -1.9110299 | 0.05600074 | 0.23562434 |
| Miip     | 738.113907 | -0.4928097 | 0.33818767 | -1.4572076 | 0.14505907 | 0.40807048 |
| Cd2ap    | 9947.00933 | -0.492842  | 0.18668746 | -2.6399311 | 0.00829229 | 0.06826543 |
| Flii     | 6505.5491  | -0.4929096 | 0.25687049 | -1.9189031 | 0.0549966  | 0.23284838 |
| Chrac1   | 1133.80363 | -0.4932195 | 0.18692532 | -2.6385911 | 0.00832513 | 0.0682911  |
| Ly6c2    | 15.8575474 | -0.4935917 | 0.429728   | -1.1486143 | 0.25071507 | 0.54423089 |
| Gpat2    | 2819.55407 | -0.4935936 | 0.28467822 | -1.733865  | 0.08294204 | 0.29843399 |
| Cenpn    | 2910.58446 | -0.493717  | 0.18863453 | -2.6173206 | 0.00886231 | 0.07126008 |
| Nono     | 21091.885  | -0.4941307 | 0.15343953 | -3.2203613 | 0.00128029 | 0.01752184 |
| Clhc1    | 1939.44975 | -0.4942926 | 0.194783   | -2.5376578 | 0.01115971 | 0.08323481 |
| Msi2     | 5570.47116 | -0.4942979 | 0.24098247 | -2.0511779 | 0.04024963 | 0.19194171 |
| Dok7     | 8.62757293 | -0.4943384 | 0.41577119 | -1.1889674 | 0.2344525  | 0.5263048  |
| Lphn1    | 6018.18796 | -0.4943663 | 0.25101998 | -1.96943   | 0.04890373 | 0.21635902 |
| Gm2848   | 7.18349524 | -0.4944353 | 0.41438196 | -1.1931873 | 0.23279601 | 0.52452319 |
| Rpl7     | 109130.883 | -0.4944517 | 0.18901492 | -2.6159404 | 0.00889821 | 0.07140804 |
| Sp7      | 8.76813145 | -0.4944548 | 0.42960663 | -1.1509479 | 0.24975367 | 0.54328149 |
| Gtpbp4   | 17157.8375 | -0.4946385 | 0.15735255 | -3.1435049 | 0.00166938 | 0.02117493 |
| Rbp4     | 95.9490911 | -0.4948187 | 0.39777896 | -1.243954  | 0.21351648 | 0.50028431 |
| Hfe      | 29.2194084 | -0.4948654 | 0.42435303 | -1.1661644 | 0.24354798 | 0.53577799 |
| Zbtb3    | 473.804882 | -0.494924  | 0.22674643 | -2.1827203 | 0.02905642 | 0.1562976  |
| Zfp180   | 2466.14396 | -0.4952424 | 0.17810473 | -2.7806245 | 0.00542545 | 0.05010161 |
| Smpdl3b  | 914.277326 | -0.4953128 | 0.38415364 | -1.2893613 | 0.19727252 | 0.48031705 |
| Thns12   | 149.760818 | -0.495402  | 0.39676375 | -1.248607  | 0.21180884 | 0.49838694 |
| Dopey2   | 2127.94025 | -0.4954405 | 0.2230819  | -2.2208906 | 0.02635837 | 0.14675943 |
| 8-Sep    | 2769.27369 | -0.4955299 | 0.24487078 | -2.0236385 | 0.04300736 | 0.19994243 |
| Misp     | 352.179988 | -0.4957939 | 0.40973368 | -1.2100395 | NA         | NA         |
| Smc5     | 8323.92135 | -0.49585   | 0.16100036 | -3.0798067 | 0.00207135 | 0.02500897 |
| Phka1    | 1803.81272 | -0.496081  | 0.22210009 | -2.2335921 | 0.02550993 | 0.14431011 |
| Cyp4f18  | 7.27015553 | -0.4961449 | 0.41619787 | -1.1920889 | 0.23322637 | 0.52480152 |
| Kcnab3   | 258.888734 | -0.4961866 | 0.2724556  | -1.821165  | 0.06858179 | 0.26629597 |
| Tiam1    | 2481.73124 | -0.4962587 | 0.31002501 | -1.6007053 | 0.10944221 | 0.34954524 |
| Ptchd2   | 17.1659398 | -0.4964689 | 0.42425278 | -1.1702195 | 0.24191267 | 0.53429681 |

|             |            |            |            |            |            |            |
|-------------|------------|------------|------------|------------|------------|------------|
| Draxin      | 127.719079 | -0.4965044 | 0.37268431 | -1.3322384 | 0.18278185 | 0.46271211 |
| Nudcd2      | 13316.8256 | -0.4967576 | 0.14718104 | -3.3751467 | 0.00073776 | 0.01175508 |
| Tex2        | 5849.35651 | -0.4968468 | 0.19921435 | -2.4940314 | 0.01263014 | 0.09022107 |
| Morc3       | 15280.7971 | -0.4968752 | 0.15870729 | -3.1307647 | 0.00174352 | 0.02195421 |
| Usp53       | 1131.99973 | -0.4969784 | 0.25865457 | -1.921398  | 0.05468154 | 0.23189329 |
| Hmgcr       | 21373.8206 | -0.4975695 | 0.20890258 | -2.3818254 | 0.01722706 | 0.11166741 |
| Cnot1       | 43102.7285 | -0.4976956 | 0.25357517 | -1.9627142 | 0.04967939 | 0.21885671 |
| Ubxn2b      | 1197.77428 | -0.4982947 | 0.18537827 | -2.6879885 | 0.00718839 | 0.06118588 |
| Pglyrp3     | 5.37959991 | -0.4983245 | 0.34935852 | -1.4263985 | 0.15375335 | NA         |
| 2210015D19I | 615.159854 | -0.4983531 | 0.21902869 | -2.2752867 | 0.02288874 | 0.13501674 |
| 2310067B10F | 2743.33238 | -0.4984015 | 0.24948341 | -1.9977342 | 0.04574548 | 0.20779516 |
| Slc45a2     | 10.5920926 | -0.4986273 | 0.39212832 | -1.271592  | NA         | NA         |
| Mpzl3       | 180.770351 | -0.4987802 | 0.31168041 | -1.6002936 | 0.10953346 | 0.34969305 |
| Thg1l       | 2110.41608 | -0.4991394 | 0.29343147 | -1.7010424 | 0.08893502 | 0.31030481 |
| Slc6a15     | 860.612824 | -0.4995275 | 0.31393164 | -1.5911985 | 0.11156492 | 0.35327755 |
| Necab1      | 107.68675  | -0.4997817 | 0.42995923 | -1.1623933 | 0.24507575 | 0.537854   |
| Gm2373      | 23512.7078 | -0.5002069 | 0.20833847 | -2.400934  | 0.01635329 | 0.10775846 |
| Vbp1        | 12027.2373 | -0.50035   | 0.20180977 | -2.479315  | 0.0131635  | 0.09262695 |
| Apln        | 187.68224  | -0.5004567 | 0.41654162 | -1.2014566 | 0.22957412 | 0.52057555 |
| Epha7       | 256.072193 | -0.5005584 | 0.27751685 | -1.8037044 | 0.07127766 | 0.27194282 |
| Lss         | 3916.79662 | -0.5007006 | 0.19457264 | -2.5733353 | 0.01007236 | 0.07788923 |
| Tle2        | 62.7340632 | -0.5007984 | 0.32543298 | -1.5388681 | 0.12383651 | 0.37568579 |
| Prpsap2     | 3899.15693 | -0.5008251 | 0.17086545 | -2.9311081 | 0.00337755 | 0.0354894  |
| Pigyl       | 1604.67319 | -0.5009463 | 0.23568221 | -2.125516  | 0.03354358 | 0.17142168 |
| Zfp943      | 544.251403 | -0.5010821 | 0.23640217 | -2.1196172 | 0.03403834 | 0.17309688 |
| Nkx1-2      | 347.983885 | -0.5011519 | 0.32532538 | -1.5404636 | 0.12344739 | 0.37516716 |
| Pdk2        | 311.858451 | -0.5011724 | 0.25930403 | -1.93276   | 0.05326578 | 0.22884208 |
| Tmem200a    | 21.809616  | -0.501663  | 0.43103225 | -1.1638643 | 0.24447901 | 0.53699054 |
| Lmod1       | 73.1983895 | -0.5020565 | 0.39609495 | -1.2675155 | 0.20497103 | 0.49027741 |
| Stip1       | 35494.133  | -0.5021147 | 0.19176631 | -2.6183678 | 0.00883515 | 0.07111565 |
| Arv1        | 557.421381 | -0.5021896 | 0.21912284 | -2.2918177 | 0.02191617 | 0.13108396 |
| Arhgef39    | 1202.34183 | -0.5022216 | 0.19579767 | -2.5650029 | 0.01031749 | 0.0790381  |
| Zfp433      | 56.6349291 | -0.5023123 | 0.41283312 | -1.2167441 | 0.2237016  | 0.51294362 |
| Zfp541      | 22.1652855 | -0.5023874 | 0.41947874 | -1.197647  | 0.23105447 | 0.5227889  |
| Gcm2        | 40.9262873 | -0.5025384 | 0.42995959 | -1.1688038 | 0.24248271 | 0.53472044 |
| Zmat4       | 480.040186 | -0.5026287 | 0.35231892 | -1.4266298 | 0.15368662 | 0.42148552 |
| Gm10432     | 13.4642643 | -0.5027314 | 0.429833   | -1.169597  | 0.24216319 | 0.53454646 |
| Naca        | 41043.2336 | -0.5027412 | 0.18779774 | -2.6770354 | 0.00742768 | 0.062776   |
| Ipo5        | 56302.4538 | -0.5027624 | 0.18259642 | -2.7534077 | 0.00589784 | 0.05307714 |
| Etl4        | 8678.80251 | -0.5028342 | 0.24122746 | -2.0844817 | 0.03711637 | 0.18265717 |
| Snord88a    | 20.4073938 | -0.5032633 | 0.41095606 | -1.2246159 | 0.22071998 | 0.50898556 |

|            |            |            |            |            |            |            |
|------------|------------|------------|------------|------------|------------|------------|
| Ces2e      | 9.62156328 | -0.5036421 | 0.40525794 | -1.2427692 | 0.2139529  | 0.50085527 |
| Fbxo48     | 168.481826 | -0.5036915 | 0.30683624 | -1.6415646 | 0.10068027 | 0.33269844 |
| Neurog1    | 8.05929258 | -0.5037135 | 0.41674122 | -1.2086962 | 0.2267796  | 0.51702822 |
| Med11      | 1402.50046 | -0.5039009 | 0.24294869 | -2.0741043 | 0.03806962 | 0.18588017 |
| Cep83os    | 55.3196354 | -0.5040575 | 0.40986338 | -1.2298183 | NA         | NA         |
| Slc25a27   | 108.617258 | -0.5042206 | 0.3213342  | -1.569147  | 0.1166137  | 0.36254692 |
| Mex3d      | 1229.63465 | -0.504422  | 0.22512384 | -2.2406424 | 0.02504925 | 0.14269526 |
| Gpha2      | 31.3038271 | -0.5044401 | 0.42566962 | -1.1850507 | 0.23599738 | 0.52775314 |
| Eri1       | 5952.08136 | -0.5045747 | 0.21716407 | -2.3234723 | 0.02015379 | 0.12466652 |
| Fam151a    | 33.0287041 | -0.5045997 | 0.42117318 | -1.1980812 | 0.23088541 | 0.52255843 |
| Selo       | 220.457651 | -0.5047855 | 0.26052143 | -1.9375969 | 0.05267242 | 0.22689995 |
| Uqcrc2     | 17206.3641 | -0.5048217 | 0.15594841 | -3.2371067 | 0.00120748 | 0.01676568 |
| Usp20      | 721.94233  | -0.5048332 | 0.25544248 | -1.9763088 | 0.04811981 | 0.21460027 |
| Ccdc129    | 4.80056318 | -0.5049587 | 0.39516399 | -1.2778459 | 0.20130378 | NA         |
| Sh2d4a     | 497.104426 | -0.5052114 | 0.32277688 | -1.5652033 | 0.11753525 | 0.3640292  |
| Nin        | 1079.18153 | -0.5052285 | 0.3316563  | -1.5233496 | 0.12767127 | 0.38169396 |
| Camk1d     | 5044.14246 | -0.5052326 | 0.21973345 | -2.2992974 | 0.02148806 | 0.12956991 |
| Sgol1      | 6780.94827 | -0.5056063 | 0.14133474 | -3.5773673 | 0.00034707 | 0.00657408 |
| Cbx1       | 9075.36215 | -0.5061834 | 0.16701512 | -3.0307641 | 0.00243936 | 0.0281831  |
| Rmi2       | 509.351384 | -0.5062402 | 0.23649809 | -2.1405677 | 0.03230892 | 0.16747866 |
| Racgap1    | 8281.05316 | -0.5063267 | 0.18754916 | -2.6997011 | 0.00694018 | 0.05966099 |
| Nuf2       | 3513.99232 | -0.5063591 | 0.16448281 | -3.0784926 | 0.00208051 | 0.02504177 |
| Kit        | 20460.5874 | -0.5067172 | 0.21134596 | -2.3975723 | 0.01650412 | 0.10847658 |
| Prr19      | 64.5943146 | -0.5071106 | 0.35840198 | -1.4149214 | 0.15709155 | 0.42655183 |
| Tars       | 23089.2498 | -0.507615  | 0.14917231 | -3.4028772 | 0.0006668  | 0.01085806 |
| Rpl6       | 63529.6804 | -0.5078291 | 0.18265705 | -2.7802329 | 0.00543199 | 0.05012105 |
| Ndc80      | 4646.86099 | -0.5080662 | 0.17442776 | -2.91276   | 0.0035825  | 0.03704217 |
| Tcp10c     | 4.97189368 | -0.5081878 | 0.30944243 | -1.6422694 | 0.10053419 | NA         |
| Fam217a    | 12.2714003 | -0.5083554 | 0.43060587 | -1.1805585 | 0.23777816 | 0.52993576 |
| Fbxl3      | 4529.12056 | -0.5084052 | 0.17675636 | -2.8763049 | 0.00402361 | 0.04000712 |
| Tmem151b   | 220.358829 | -0.508528  | 0.28909937 | -1.7590076 | 0.07857622 | 0.2888991  |
| Insl6      | 70.6198535 | -0.5085515 | 0.32611662 | -1.559416  | 0.11889795 | 0.36678873 |
| Parm1      | 179.832888 | -0.5086398 | 0.3535598  | -1.4386246 | NA         | NA         |
| Dpy19l4    | 1013.10988 | -0.5086465 | 0.28129414 | -1.8082373 | 0.07056958 | 0.27030236 |
| Hsd17b10   | 4567.53306 | -0.5087807 | 0.22738032 | -2.2375759 | 0.02524873 | 0.14341894 |
| Cspp1      | 3265.75195 | -0.5091262 | 0.19470687 | -2.614834  | 0.00892708 | 0.07148561 |
| Zfp87      | 1175.98333 | -0.509138  | 0.18570271 | -2.7416829 | 0.00611253 | 0.05441098 |
| Sec31b     | 150.773774 | -0.5095042 | 0.34461225 | -1.4784853 | 0.13927792 | 0.39902765 |
| A430078G23 | 31.0605563 | -0.5095792 | 0.43028403 | -1.1842857 | 0.2363     | 0.52810283 |
| Setx       | 15445.3625 | -0.5097183 | 0.28364475 | -1.7970306 | 0.07233076 | 0.27429691 |
| Syne1      | 331.432632 | -0.5102185 | 0.29731898 | -1.7160645 | 0.08615024 | 0.30489812 |

|          |            |            |            |            |            |            |
|----------|------------|------------|------------|------------|------------|------------|
| Spats2l  | 1057.87169 | -0.5103046 | 0.28178742 | -1.8109561 | 0.07014765 | 0.26968196 |
| Gcnt4    | 474.064417 | -0.5105893 | 0.26341474 | -1.9383476 | 0.05258083 | 0.22676332 |
| Ccnb2    | 9062.01278 | -0.5107709 | 0.15493064 | -3.2967714 | 0.00097803 | 0.01432143 |
| Cwc27    | 3682.56063 | -0.5107738 | 0.23350792 | -2.1873941 | 0.02871377 | 0.15542836 |
| Arl10    | 394.187124 | -0.5107806 | 0.21692162 | -2.3546779 | 0.01853877 | 0.11733675 |
| Rab3d    | 450.038472 | -0.5108032 | 0.25399838 | -2.011049  | 0.04432028 | 0.20355129 |
| Ptger4   | 39.6465362 | -0.5110968 | 0.38225883 | -1.3370438 | 0.18120835 | 0.45992672 |
| Plac8    | 32.7218778 | -0.5110977 | 0.42245296 | -1.2098333 | NA         | NA         |
| Ap3s1    | 1258.3284  | -0.5113452 | 0.18624663 | -2.7455273 | 0.00604137 | 0.05405604 |
| Gm16386  | 475.388201 | -0.511413  | 0.20700173 | -2.4705736 | 0.01348966 | 0.09453702 |
| Rsu1     | 2810.5443  | -0.5115599 | 0.2147497  | -2.3821215 | 0.01721322 | 0.11162749 |
| Acbd7    | 157.370551 | -0.5116986 | 0.3461315  | -1.4783358 | 0.13931791 | 0.39906664 |
| Acer1    | 11.9015909 | -0.5117106 | 0.43222057 | -1.1839109 | 0.23644835 | 0.52810283 |
| Khynyn   | 1329.97482 | -0.5125627 | 0.16882635 | -3.0360348 | 0.00239712 | 0.02786066 |
| Ccdc113  | 110.502455 | -0.5126347 | 0.33347488 | -1.5372512 | 0.12423181 | 0.37637423 |
| Pde4b    | 6.44843202 | -0.5129221 | 0.40508196 | -1.266218  | 0.20543505 | 0.49038835 |
| Rsbnl1   | 3141.1226  | -0.5130115 | 0.21275863 | -2.4112369 | 0.01589852 | 0.10570239 |
| Adamts17 | 22.3652796 | -0.5132742 | 0.42250733 | -1.2148291 | 0.22443128 | 0.51368924 |
| Mmab     | 1131.79964 | -0.5133003 | 0.22097382 | -2.3229008 | 0.02018448 | 0.12475195 |
| Rapgef4  | 12.8606155 | -0.5133833 | 0.41836237 | -1.2271259 | 0.21977527 | 0.50829485 |
| Spg11    | 2912.48134 | -0.5134255 | 0.18428088 | -2.7861028 | 0.00533459 | 0.04949778 |
| Dennd1a  | 1277.30859 | -0.5135573 | 0.17403396 | -2.9509028 | 0.00316847 | 0.03402818 |
| Cyb5     | 4370.44555 | -0.5135876 | 0.1969039  | -2.6083163 | 0.00909888 | 0.07252523 |
| Alkbh8   | 1187.22438 | -0.5136012 | 0.25758139 | -1.9939374 | 0.0461589  | 0.20891066 |
| Adprm    | 1423.08287 | -0.5136282 | 0.22477731 | -2.2850537 | 0.02230968 | 0.13256611 |
| Snord88c | 20.5062259 | -0.5136375 | 0.41630868 | -1.2337899 | 0.2172812  | 0.50492228 |
| G6b      | 32.3530512 | -0.513905  | 0.3989588  | -1.2881156 | 0.19770573 | 0.48093412 |
| Otx2os1  | 11.3868638 | -0.5139964 | 0.41709769 | -1.2323167 | 0.21783082 | 0.50574605 |
| Trnt1    | 5617.01467 | -0.5142727 | 0.18741925 | -2.7439695 | 0.00607012 | 0.05418852 |
| Mtmr1    | 837.283581 | -0.5144194 | 0.21046196 | -2.4442392 | 0.0145158  | 0.0993907  |
| Serbp1   | 85462.7077 | -0.5144466 | 0.14734049 | -3.4915496 | 0.00048023 | 0.00839103 |
| Phlpp1   | 1640.76538 | -0.5146061 | 0.28203063 | -1.8246461 | 0.06805445 | 0.2648758  |
| Rai14    | 9878.85911 | -0.5149158 | 0.23646445 | -2.1775614 | 0.02943871 | 0.15726601 |
| Triqk    | 66.869587  | -0.51531   | 0.33859238 | -1.5219185 | 0.12802951 | 0.38211884 |
| BC005561 | 768.329344 | -0.5154092 | 0.30386442 | -1.6961814 | 0.08985152 | 0.31210209 |
| Crb3     | 410.187295 | -0.5154768 | 0.36519295 | -1.411519  | 0.15809165 | 0.42823257 |
| Lgr4     | 3732.42907 | -0.5155553 | 0.29459045 | -1.7500747 | 0.08010542 | 0.29194269 |
| Scai     | 2030.79441 | -0.5155735 | 0.21592025 | -2.387796  | 0.01694975 | 0.11024069 |
| H2afy    | 16493.1861 | -0.5155933 | 0.19841124 | -2.5986093 | 0.00936022 | 0.07382763 |
| Plk1     | 7614.70165 | -0.5156499 | 0.21384697 | -2.4113034 | 0.01589562 | 0.10570239 |
| Phf19    | 270.980901 | -0.5157024 | 0.31713999 | -1.6261034 | 0.10392765 | 0.33930559 |



|             |            |            |            |            |            |            |
|-------------|------------|------------|------------|------------|------------|------------|
| Rpl17       | 66584.4838 | -0.5159158 | 0.21989759 | -2.346164  | 0.01896776 | 0.11917884 |
| Lctl        | 85.0895768 | -0.5161514 | 0.34038251 | -1.5163865 | 0.12942166 | 0.38455938 |
| Dicer1      | 6056.9686  | -0.5161812 | 0.22252732 | -2.3196307 | 0.02036087 | 0.12539874 |
| Cd40        | 62.3516434 | -0.5166031 | 0.37977645 | -1.3602822 | 0.17374064 | 0.45100512 |
| Klhl28      | 622.06654  | -0.5166053 | 0.26087418 | -1.9802852 | 0.04767149 | 0.21315103 |
| Tff2        | 13.2131972 | -0.5174787 | 0.43182738 | -1.1983462 | 0.23078225 | 0.52247704 |
| 2700099C18f | 1711.114   | -0.5174788 | 0.22777701 | -2.2718657 | 0.02309462 | 0.1357311  |
| Rps6ka6     | 6238.7917  | -0.5175422 | 0.2105012  | -2.4586188 | 0.01394726 | 0.09656895 |
| Klc2        | 1297.85513 | -0.5176223 | 0.2010146  | -2.5750484 | 0.01002261 | 0.0776203  |
| Shprh       | 3602.93386 | -0.5178515 | 0.21221265 | -2.4402481 | 0.01467718 | 0.10015129 |
| Xrn1        | 2666.27464 | -0.5180287 | 0.28849728 | -1.7956104 | 0.0725565  | 0.27466556 |
| Sp8         | 109.144788 | -0.5180365 | 0.37004485 | -1.3999289 | 0.1615346  | 0.43255956 |
| Fam199x     | 1513.17168 | -0.518174  | 0.18409452 | -2.8147168 | 0.00488202 | 0.04606817 |
| Ttc3        | 9165.94602 | -0.5182992 | 0.20234766 | -2.5614292 | 0.01042425 | 0.07965969 |
| Sugp2       | 2937.06482 | -0.519252  | 0.17869698 | -2.9057682 | 0.00366353 | 0.03760238 |
| Adcyap1r1   | 55.0317688 | -0.5192687 | 0.43135818 | -1.2037993 | 0.22866715 | 0.51942782 |
| Gm8615      | 196.760624 | -0.5204854 | 0.37766999 | -1.3781486 | 0.16815741 | 0.44308872 |
| Gadd45gip1  | 3565.43727 | -0.5205511 | 0.18448508 | -2.8216435 | 0.00477783 | 0.04549906 |
| Uaca        | 4205.07898 | -0.520959  | 0.18738771 | -2.7801131 | 0.005434   | 0.05012105 |
| Rsb1        | 3128.43775 | -0.5209709 | 0.2081037  | -2.5034197 | 0.01229996 | 0.08867716 |
| Acs1        | 10841.0988 | -0.5211323 | 0.16878989 | -3.0874615 | 0.00201874 | 0.02460728 |
| Trip6       | 1107.57152 | -0.5212316 | 0.25297808 | -2.0603823 | 0.039362   | 0.18954651 |
| Eif4enif1   | 6598.45053 | -0.5212998 | 0.22716502 | -2.2948068 | 0.0217442  | 0.13050717 |
| Pdha1       | 27128.3908 | -0.5217905 | 0.15249699 | -3.4216443 | 0.00062244 | 0.01030832 |
| Btbd11      | 1284.93347 | -0.5223018 | 0.23953685 | -2.1804654 | 0.02922298 | 0.15675976 |
| AI987944    | 1040.46594 | -0.5225381 | 0.18943153 | -2.7584537 | 0.00580755 | 0.05259946 |
| Matr3       | 39028.2568 | -0.5229807 | 0.16182425 | -3.2317819 | 0.00123021 | 0.01697938 |
| Dcxr        | 1146.41104 | -0.5231058 | 0.26783794 | -1.9530684 | 0.05081149 | 0.22164643 |
| Igfals      | 387.405208 | -0.5231751 | 0.27128357 | -1.9285176 | 0.05379077 | 0.22993412 |
| Igsf3       | 3824.37488 | -0.5231866 | 0.22297673 | -2.3463732 | 0.01895711 | 0.11916009 |
| 2310069B03f | 54.0176949 | -0.5234326 | 0.38027733 | -1.3764495 | 0.16868251 | 0.44348648 |
| Nqo1        | 5984.04013 | -0.5234521 | 0.24030149 | -2.1783141 | 0.02938266 | 0.15717603 |
| Mad2l1      | 8219.59607 | -0.5235908 | 0.15863295 | -3.3006436 | 0.00096463 | 0.01416526 |
| Hexb        | 14469.6598 | -0.5238837 | 0.23441586 | -2.2348475 | 0.02542736 | 0.14394646 |
| Eef1e1      | 7559.58264 | -0.5238837 | 0.17884032 | -2.9293378 | 0.00339685 | 0.03564401 |
| Hmgb2       | 18849.9148 | -0.5239242 | 0.18693654 | -2.8026848 | 0.00506792 | 0.04743073 |
| 3-Sep       | 1325.19862 | -0.5243254 | 0.3742588  | -1.4009701 | 0.16122301 | 0.43227306 |
| Dcp1b       | 242.399433 | -0.5244597 | 0.24046767 | -2.1809989 | 0.0291835  | 0.15665607 |
| Zfp953      | 1130.16026 | -0.5246555 | 0.216531   | -2.4230039 | 0.01539276 | 0.1033293  |
| Rbpms       | 6360.80704 | -0.5248304 | 0.20283237 | -2.5875082 | 0.00966729 | 0.07552918 |
| Spag7       | 5216.45871 | -0.5250035 | 0.20003662 | -2.6245371 | 0.00867668 | 0.07024004 |

|             |            |            |            |            |            |            |
|-------------|------------|------------|------------|------------|------------|------------|
| Nrf1        | 3576.4472  | -0.5251925 | 0.15884932 | -3.3062306 | 0.0009456  | 0.01398576 |
| Hmgb1       | 15145.3297 | -0.5252275 | 0.25042083 | -2.0973793 | 0.03596001 | 0.17992732 |
| Zbed6       | 4136.08619 | -0.5252293 | 0.35009804 | -1.500235  | 0.13355354 | 0.39061334 |
| Anxa2       | 1111.6755  | -0.5258321 | 0.39003273 | -1.3481743 | 0.17760234 | 0.45508222 |
| 5133400J02R | 186.783173 | -0.5258558 | 0.24602713 | -2.1373894 | 0.03256633 | 0.16830808 |
| Cenpu       | 2403.29912 | -0.5258685 | 0.20015546 | -2.6273004 | 0.00860653 | 0.06989043 |
| Mthfd1l     | 9115.98007 | -0.5260397 | 0.16034871 | -3.2805985 | 0.00103587 | 0.01497103 |
| E130307A14f | 80.1619645 | -0.5261831 | 0.33685667 | -1.5620384 | 0.11827893 | 0.36545911 |
| Ankrd36     | 40.8345525 | -0.5263188 | 0.39684768 | -1.326249  | 0.18475725 | 0.46476221 |
| Pgk1        | 16659.152  | -0.5263971 | 0.29113671 | -1.8080752 | 0.0705948  | 0.27033013 |
| Rmnd5b      | 3074.38043 | -0.5265652 | 0.17988514 | -2.9272303 | 0.00341995 | 0.03586225 |
| Diap2       | 2743.31955 | -0.5265827 | 0.26607411 | -1.979083  | 0.04780666 | 0.2135883  |
| Afap1       | 1297.33261 | -0.5266678 | 0.21200515 | -2.4842217 | 0.0129835  | 0.09190093 |
| Hist1h3b    | 3.47307112 | -0.5272791 | 0.35967019 | -1.4660073 | 0.14264629 | NA         |
| Rad23a      | 5126.1722  | -0.5277729 | 0.17730919 | -2.9765681 | 0.00291494 | 0.03213457 |
| Ccdc57      | 385.737684 | -0.5280685 | 0.26658218 | -1.9808845 | 0.04760423 | 0.21296913 |
| Kif4        | 5240.3849  | -0.528076  | 0.17500173 | -3.0175472 | 0.00254829 | 0.02893785 |
| Mycn        | 6490.17043 | -0.5281735 | 0.21694458 | -2.4346009 | 0.01490822 | 0.10106267 |
| Cadm3       | 21.9267793 | -0.528195  | 0.43125398 | -1.2247886 | 0.22065488 | 0.50895937 |
| Pclo        | 55.5858153 | -0.5284255 | 0.42513104 | -1.2429709 | 0.21387857 | 0.50083204 |
| Cpne3       | 6224.50811 | -0.5284546 | 0.20655143 | -2.5584649 | 0.01051354 | 0.07998991 |
| Cdk5rap3    | 5975.90279 | -0.5285148 | 0.22967677 | -2.3011242 | 0.02138461 | 0.12925061 |
| Mir3101     | 34.7409643 | -0.5286471 | 0.38095042 | -1.3877058 | 0.16522665 | 0.43861233 |
| Padi2       | 1690.97931 | -0.5286513 | 0.43106041 | -1.2263974 | 0.22004918 | 0.50864133 |
| Gbx1        | 20.4589516 | -0.5289225 | 0.41616699 | -1.2709382 | 0.20375063 | 0.48844243 |
| Sh2d5       | 307.949193 | -0.5291068 | 0.32438121 | -1.6311264 | 0.10286365 | 0.33711962 |
| Ndrp4       | 818.386226 | -0.5291648 | 0.20196709 | -2.6200546 | 0.00879157 | 0.07083818 |
| Slit3       | 189.176381 | -0.5294139 | 0.40877061 | -1.295137  | 0.19527297 | 0.47806832 |
| Osbp2       | 25.1721621 | -0.5294606 | 0.41626318 | -1.2719372 | 0.20339542 | 0.48796701 |
| Xpo4        | 4313.04543 | -0.5295108 | 0.28616298 | -1.850382  | 0.06425851 | 0.2566874  |
| Snx10       | 6564.038   | -0.5295681 | 0.17054755 | -3.1051055 | 0.00190211 | 0.02360713 |
| Rpl23       | 69786.7786 | -0.5297278 | 0.24627726 | -2.1509406 | 0.03148089 | 0.16477931 |
| Dnajc7      | 26036.9596 | -0.5298011 | 0.20298123 | -2.6100989 | 0.0090516  | 0.07222243 |
| Zfp534      | 3108.74506 | -0.5300336 | 0.32101873 | -1.6510988 | 0.09871841 | 0.32873019 |
| Trappc12    | 2470.55164 | -0.5304755 | 0.25699766 | -2.0641257 | 0.0390058  | 0.18837864 |
| Adhfe1      | 463.370695 | -0.5307974 | 0.34885333 | -1.5215489 | 0.12812215 | 0.38211884 |
| Sh2b2       | 113.11885  | -0.530851  | 0.28845255 | -1.8403408 | 0.06571821 | 0.25965039 |
| Gtf3c3      | 4166.80154 | -0.5308982 | 0.18921266 | -2.8058282 | 0.00501874 | 0.04712355 |
| Sema6b      | 253.287837 | -0.5311357 | 0.28866334 | -1.8399831 | 0.06577072 | 0.25979183 |
| Zfp758      | 752.818    | -0.5313384 | 0.26395236 | -2.0130086 | 0.04411372 | 0.20290225 |
| Ptpu        | 201.523726 | -0.5315383 | 0.3585571  | -1.4824369 | 0.13822408 | 0.3974709  |

|             |            |            |            |            |            |            |
|-------------|------------|------------|------------|------------|------------|------------|
| Tnpo1       | 19856.7511 | -0.5319927 | 0.25425692 | -2.0923432 | 0.03640782 | 0.18094537 |
| Zfp90       | 634.156104 | -0.5320101 | 0.217478   | -2.4462708 | 0.01443425 | 0.09914624 |
| Stk17b      | 1360.75611 | -0.5325229 | 0.20407069 | -2.6095022 | 0.00906741 | 0.0723114  |
| Tarsl2      | 1196.58296 | -0.5327092 | 0.25618973 | -2.0793542 | 0.03758481 | 0.18420465 |
| Ascc1       | 2208.19947 | -0.5331205 | 0.20780977 | -2.5654255 | 0.01030493 | 0.07898079 |
| Stat4       | 604.143186 | -0.53375   | 0.22598432 | -2.3618894 | 0.01818207 | 0.11607115 |
| Trabd       | 1129.82162 | -0.5341345 | 0.23426968 | -2.2799986 | 0.02260777 | 0.13372895 |
| Pla2g2c     | 46.9918955 | -0.5342037 | 0.38482053 | -1.3881892 | 0.16507943 | 0.43853774 |
| Hlcs        | 654.819513 | -0.5342159 | 0.20910701 | -2.5547489 | 0.01062644 | 0.08049284 |
| Magi1       | 2188.14364 | -0.5342933 | 0.21671093 | -2.4654655 | 0.01368354 | 0.09542273 |
| Zfp879      | 64.4792531 | -0.5342969 | 0.38802676 | -1.3769588 | 0.16852498 | 0.44336524 |
| Pitpnm3     | 45.7879323 | -0.5345536 | 0.43223537 | -1.2367187 | NA         | NA         |
| Abhd14b     | 177.535578 | -0.534618  | 0.35133908 | -1.5216581 | 0.12809477 | 0.38211884 |
| Ly75        | 11954.2114 | -0.535035  | 0.31453169 | -1.7010528 | 0.08893307 | 0.31030481 |
| Gm5796      | 10.6323094 | -0.5352622 | 0.40587829 | -1.3187751 | 0.18724431 | 0.46836678 |
| Igfbp4      | 750.583442 | -0.5354504 | 0.41392341 | -1.2935978 | 0.19580438 | 0.47884164 |
| Ero1l       | 4843.116   | -0.5355972 | 0.22315046 | -2.4001618 | 0.01638783 | 0.10794033 |
| Kiz         | 755.558157 | -0.5356661 | 0.17798577 | -3.0096008 | 0.00261591 | 0.02947831 |
| Padi1       | 29.0397336 | -0.5356727 | 0.42727584 | -1.2536929 | 0.20995364 | 0.49635769 |
| Ctdspl2     | 6068.04988 | -0.5358625 | 0.17969846 | -2.9820096 | 0.00286363 | 0.03167305 |
| Pecr        | 1743.58536 | -0.5360459 | 0.25363749 | -2.1134334 | 0.03456369 | 0.17485359 |
| 4930452B06f | 1250.25156 | -0.5361653 | 0.25682517 | -2.0876663 | 0.03682795 | 0.18223429 |
| Kif22       | 8516.84738 | -0.5362936 | 0.2034903  | -2.6354749 | 0.00840196 | 0.06864892 |
| Nsmaf       | 2538.65354 | -0.5363172 | 0.219264   | -2.4459885 | 0.01444556 | 0.0991801  |
| Urb2        | 7784.89195 | -0.5364703 | 0.26696213 | -2.0095372 | 0.04448019 | 0.20400802 |
| Mei4        | 176.518633 | -0.536656  | 0.27354583 | -1.9618505 | 0.0497799  | 0.21905936 |
| Selm        | 806.779967 | -0.5368347 | 0.33708621 | -1.5925739 | 0.11125582 | 0.35271344 |
| Cd209e      | 21.4442993 | -0.5371557 | 0.42593808 | -1.2611121 | 0.20726847 | 0.49270563 |
| Syngr1      | 3016.9815  | -0.5372485 | 0.2573887  | -2.0873042 | 0.03686064 | 0.18226387 |
| Cxcl12      | 23.8265621 | -0.5373525 | 0.43078885 | -1.2473685 | 0.2122624  | 0.49892572 |
| Nadk2       | 6038.98691 | -0.5381798 | 0.19567315 | -2.7504018 | 0.00595222 | 0.05342303 |
| Cep152      | 1690.68148 | -0.5382613 | 0.18031895 | -2.985051  | 0.00283531 | 0.03142688 |
| Pja1        | 2210.63738 | -0.5387645 | 0.1927756  | -2.7947751 | 0.00519358 | 0.04833357 |
| Nipal1      | 84.5701897 | -0.5391478 | 0.43178627 | -1.2486451 | 0.21179491 | 0.49838694 |
| AK129341    | 284.791664 | -0.5393032 | 0.34450511 | -1.5654432 | 0.11747902 | 0.36401527 |
| Topbp1      | 19930.5998 | -0.5393455 | 0.18849556 | -2.8613169 | 0.00421885 | 0.04126249 |
| Rab25       | 270.385006 | -0.5396339 | 0.42483942 | -1.2702068 | NA         | NA         |
| AW549877    | 8282.12568 | -0.539641  | 0.18355322 | -2.9399701 | 0.00328244 | 0.03481938 |
| Fhod3       | 722.351737 | -0.5398832 | 0.26502057 | -2.0371369 | 0.04163632 | 0.19567437 |
| Ephx2       | 8016.77587 | -0.5399183 | 0.27053988 | -1.9957069 | 0.04596584 | 0.20850713 |
| Pgpep1      | 3464.50062 | -0.5399977 | 0.20437577 | -2.6421807 | 0.00823741 | 0.0679215  |

|             |            |            |            |            |            |            |
|-------------|------------|------------|------------|------------|------------|------------|
| Gm13157     | 6259.09136 | -0.5400259 | 0.21222367 | -2.5446073 | 0.01094007 | 0.08191094 |
| Ncam1       | 1932.12664 | -0.5400826 | 0.26650614 | -2.0265299 | 0.04271051 | 0.1991746  |
| Utp14b      | 1552.72024 | -0.5400858 | 0.24221901 | -2.2297418 | 0.02576459 | 0.14511594 |
| A430033K04f | 632.995832 | -0.5403143 | 0.21360015 | -2.5295594 | 0.01142059 | 0.08457215 |
| Nlrp5       | 3.38988213 | -0.5403515 | 0.33073199 | -1.6338047 | 0.10229986 | NA         |
| Slc25a30    | 1366.42122 | -0.5403949 | 0.27307471 | -1.978927  | 0.04782422 | 0.2135883  |
| Aktip       | 3186.68699 | -0.5404278 | 0.20531812 | -2.6321486 | 0.00848467 | 0.06918991 |
| Kank1       | 2017.36528 | -0.5405047 | 0.21620166 | -2.5000026 | 0.01241924 | 0.08920627 |
| Ralgps1     | 1042.54454 | -0.5405772 | 0.21361337 | -2.5306335 | 0.01138567 | 0.08439401 |
| Zfp850      | 4402.0304  | -0.5407373 | 0.17893165 | -3.0220325 | 0.00251084 | 0.02866814 |
| Cryzl1      | 3795.18081 | -0.5407804 | 0.22692134 | -2.3831185 | 0.01716667 | 0.11146508 |
| Setd6       | 3446.5467  | -0.5410855 | 0.17264245 | -3.1341394 | 0.00172359 | 0.02173848 |
| Ankrd26     | 2430.92918 | -0.5411364 | 0.23357784 | -2.3167281 | 0.02051855 | 0.12577215 |
| Hltf        | 5305.01491 | -0.5412238 | 0.19620227 | -2.7584991 | 0.00580675 | 0.05259946 |
| Zfp871      | 4144.00881 | -0.5414015 | 0.24371784 | -2.2214274 | 0.02632202 | 0.14666206 |
| Rpl18a      | 42866.4032 | -0.5416989 | 0.26468951 | -2.0465445 | 0.04070283 | 0.19339128 |
| Bod1l       | 5334.26716 | -0.5417368 | 0.25767626 | -2.1023933 | 0.03551884 | 0.17852406 |
| Epdr1       | 640.665336 | -0.5418211 | 0.25862408 | -2.0950139 | 0.03616975 | 0.18049079 |
| Unc13a      | 410.123056 | -0.54202   | 0.27502873 | -1.970776  | 0.04874951 | 0.21604611 |
| Trim13      | 5018.23893 | -0.542048  | 0.17529294 | -3.0922411 | 0.00198651 | 0.02430881 |
| Gm4371      | 140.11824  | -0.5420989 | 0.36444159 | -1.4874781 | 0.13688858 | 0.39501843 |
| Ppp1r16b    | 100.662806 | -0.5423212 | 0.407241   | -1.3316961 | 0.18296008 | 0.46301256 |
| Nemf        | 6385.58086 | -0.5423397 | 0.16614572 | -3.2642414 | 0.00109758 | 0.01568787 |
| Myo5b       | 107.90749  | -0.542343  | 0.3578023  | -1.5157616 | 0.12957965 | 0.3847066  |
| Zfp862-ps   | 501.290748 | -0.5425578 | 0.23902724 | -2.2698576 | 0.02321623 | 0.13620929 |
| Fgf21       | 10.2103191 | -0.5429133 | 0.42140034 | -1.2883551 | 0.19762238 | 0.48086773 |
| Hlf         | 63.2414103 | -0.5429168 | 0.37398463 | -1.4517089 | 0.14658257 | 0.41079574 |
| Klhl7       | 1920.42386 | -0.5431565 | 0.24273321 | -2.2376686 | 0.02524267 | 0.14341894 |
| Depdc1b     | 1692.47588 | -0.5431936 | 0.17002718 | -3.1947456 | 0.00139954 | 0.01868178 |
| Creb3l2     | 1344.66494 | -0.5432244 | 0.26160298 | -2.076522  | 0.0378457  | 0.1850873  |
| Nmnat1      | 391.533196 | -0.5432355 | 0.23087414 | -2.3529507 | 0.0186251  | 0.11769157 |
| Rpgr        | 1066.19989 | -0.5436133 | 0.22382354 | -2.4287585 | 0.01515062 | 0.10230452 |
| Mlh3        | 3178.43054 | -0.5438953 | 0.19776889 | -2.7501559 | 0.00595669 | 0.05342303 |
| Dzip3       | 3970.31488 | -0.5442893 | 0.28234574 | -1.9277405 | 0.05388741 | 0.23016012 |
| Slc19a3     | 120.866643 | -0.5444649 | 0.37742855 | -1.4425642 | 0.14914328 | 0.41453568 |
| P2ry1       | 45.5576406 | -0.544835  | 0.41837951 | -1.3022506 | 0.19283073 | 0.47556451 |
| Mga         | 21611.3399 | -0.5448706 | 0.22959819 | -2.3731484 | 0.01763718 | 0.11361877 |
| Tbrg3       | 10.2683195 | -0.544884  | 0.42315227 | -1.2876782 | 0.19785799 | 0.48094783 |
| Ssh1        | 2197.88163 | -0.545001  | 0.21766344 | -2.5038702 | 0.01228431 | 0.08860542 |
| Pkia        | 50.8154014 | -0.5451498 | 0.43209396 | -1.2616465 | 0.20707601 | 0.4924666  |
| Galnt18     | 74.7139224 | -0.5452943 | 0.42107584 | -1.2950027 | 0.19531931 | 0.47809787 |

|             |            |            |            |            |            |            |
|-------------|------------|------------|------------|------------|------------|------------|
| Jup         | 7744.90931 | -0.5453466 | 0.33695891 | -1.6184364 | 0.10556859 | 0.34216279 |
| Skil        | 5392.58383 | -0.5454464 | 0.27716098 | -1.9679768 | 0.0490707  | 0.21685095 |
| Wdr83os     | 1032.5322  | -0.5455617 | 0.20793125 | -2.6237599 | 0.00869651 | 0.0703273  |
| Ccdc33      | 14.4555305 | -0.5458915 | 0.37892284 | -1.4406403 | 0.14968633 | 0.41545103 |
| Pard6g      | 1026.66858 | -0.5459667 | 0.20652001 | -2.6436505 | 0.00820173 | 0.06777104 |
| Vwa3a       | 51.2462663 | -0.5460194 | 0.41520365 | -1.3150641 | 0.18848837 | 0.46966554 |
| Osbpl1a     | 5543.24681 | -0.5464418 | 0.20476745 | -2.6685971 | 0.00761688 | 0.06402705 |
| Naa25       | 7787.20236 | -0.5466862 | 0.19867933 | -2.7516007 | 0.00593048 | 0.0532881  |
| Dbp         | 416.337514 | -0.54674   | 0.23785851 | -2.2985932 | 0.02152805 | 0.12976073 |
| NrOb1       | 5826.80916 | -0.5467408 | 0.33192359 | -1.6471888 | 0.09951925 | 0.32999971 |
| Carm1       | 7435.52706 | -0.546773  | 0.20503984 | -2.6666672 | 0.00766075 | 0.06425691 |
| Fbln1       | 4523.8047  | -0.5467738 | 0.26368578 | -2.0735809 | 0.03811825 | 0.18603746 |
| Oas1a       | 1692.64578 | -0.5470291 | 0.19305782 | -2.8334989 | 0.00460415 | 0.04414247 |
| Pax8        | 47.6686894 | -0.5471068 | 0.38969767 | -1.4039264 | 0.16034077 | 0.43166    |
| Traip       | 4304.3127  | -0.5478296 | 0.23269998 | -2.3542315 | 0.01856105 | 0.11740754 |
| Cngb1       | 63.7132224 | -0.5478327 | 0.4101953  | -1.3355411 | 0.18169932 | 0.46079683 |
| Siah1a      | 1716.35018 | -0.5480278 | 0.18613708 | -2.944216  | 0.00323774 | 0.03460487 |
| Zfp354a     | 385.313705 | -0.5481261 | 0.2008008  | -2.7297009 | 0.00633918 | 0.05577716 |
| Htatsf1     | 5303.43926 | -0.5482758 | 0.15212864 | -3.6040275 | 0.00031332 | 0.00606787 |
| Dand5       | 169.179474 | -0.5484219 | 0.29674458 | -1.8481278 | 0.06458386 | 0.25732607 |
| Cbx3        | 3212.68918 | -0.5485727 | 0.17193966 | -3.1904956 | 0.00142029 | 0.01891004 |
| Vim         | 12702.8339 | -0.5487224 | 0.30339566 | -1.8086034 | 0.07051264 | 0.27025546 |
| Slc27a2     | 1339.82257 | -0.5487403 | 0.36372068 | -1.508686  | 0.13137904 | 0.38745979 |
| Phip        | 7194.3683  | -0.5488242 | 0.21438026 | -2.5600502 | 0.0104657  | 0.07989797 |
| Sp3         | 11092.9784 | -0.5490247 | 0.18612486 | -2.9497654 | 0.00318015 | 0.03410659 |
| Slc25a36    | 12638.4549 | -0.5490684 | 0.17852239 | -3.0756276 | 0.0021006  | 0.0252254  |
| Fam76b      | 3940.19806 | -0.5493361 | 0.18210164 | -3.0166456 | 0.00255588 | 0.02899093 |
| Acsl4       | 3150.50995 | -0.5493574 | 0.21931798 | -2.5048444 | 0.01225053 | 0.08848489 |
| Iars        | 27088.0655 | -0.5494943 | 0.18292578 | -3.0039193 | 0.00266526 | 0.03001264 |
| Myl7        | 246.204564 | -0.5495308 | 0.27260553 | -2.0158463 | 0.04381605 | 0.202071   |
| Flt3l       | 75.1767172 | -0.5495546 | 0.38334912 | -1.4335617 | 0.15169738 | 0.41871751 |
| Col5a3      | 207.529646 | -0.5496355 | 0.40839455 | -1.3458442 | 0.17835275 | 0.45610322 |
| 6820431F20F | 2942.88875 | -0.5498748 | 0.21537884 | -2.5530584 | 0.01067816 | 0.08076655 |
| Hmgcs2      | 6.62225581 | -0.5500621 | 0.39659625 | -1.3869574 | 0.16545474 | 0.43892642 |
| Troap       | 1504.43492 | -0.5506499 | 0.2032828  | -2.7087874 | 0.00675296 | 0.05860383 |
| Dera        | 3344.12229 | -0.5510676 | 0.25845714 | -2.132143  | 0.0329951  | 0.16973428 |
| Mphosph10   | 8318.44655 | -0.5511832 | 0.15659404 | -3.5198226 | 0.00043184 | 0.00776355 |
| Zfp109      | 216.39555  | -0.5512425 | 0.30201467 | -1.8252175 | 0.06796822 | 0.26474569 |
| Anln        | 19541.9715 | -0.5514086 | 0.23580938 | -2.3383658 | 0.01936828 | 0.12096229 |
| Skap1       | 10.5136055 | -0.5514599 | 0.42578513 | -1.2951601 | 0.19526502 | 0.47806832 |
| A630007B06l | 1207.02167 | -0.5516255 | 0.2510438  | -2.1973276 | 0.02799706 | 0.15293942 |

|             |            |            |            |            |            |            |
|-------------|------------|------------|------------|------------|------------|------------|
| Tmem194     | 4182.24047 | -0.5516969 | 0.20506396 | -2.690365  | 0.00713739 | 0.06091852 |
| Sdhb        | 9989.15934 | -0.5517102 | 0.23174928 | -2.380634  | 0.01728287 | 0.11189258 |
| St6galnac3  | 749.306202 | -0.5521461 | 0.30176355 | -1.8297309 | 0.06729019 | 0.26331573 |
| Zfp65       | 1697.9833  | -0.5521797 | 0.19277044 | -2.8644418 | 0.00417745 | 0.04099481 |
| Zfml        | 15821.873  | -0.5522118 | 0.16638434 | -3.3188929 | 0.00090375 | 0.0135683  |
| B4galt2     | 420.11273  | -0.5524697 | 0.2447161  | -2.2575944 | 0.02397096 | 0.13873104 |
| Mcf2        | 12540.5968 | -0.552478  | 0.22507894 | -2.4545965 | 0.01410428 | 0.09748253 |
| 1110007C09F | 727.928174 | -0.5525056 | 0.26213268 | -2.1077327 | 0.03505412 | 0.17681694 |
| Rab3a       | 402.136131 | -0.5529284 | 0.2128637  | -2.5975699 | 0.0093886  | 0.07388771 |
| Mt3         | 35.517759  | -0.5529795 | 0.42597828 | -1.2981402 | 0.19423916 | 0.47688873 |
| Rpl5        | 60724.0154 | -0.5531075 | 0.19988287 | -2.7671581 | 0.00565473 | 0.05160608 |
| Mroh8       | 30.4776361 | -0.5535754 | 0.39545566 | -1.399842  | 0.16156063 | 0.43255956 |
| Efhd2       | 2165.70168 | -0.5536383 | 0.19883627 | -2.784393  | 0.0053628  | 0.04967059 |
| Txnrd3      | 761.030567 | -0.5543569 | 0.23856702 | -2.3236948 | 0.02014186 | 0.12464228 |
| Slc30a3     | 371.979853 | -0.5547619 | 0.28754064 | -1.9293338 | 0.05368944 | 0.22973636 |
| Ets1        | 62.0523878 | -0.5548482 | 0.3781841  | -1.4671379 | 0.14233855 | 0.40318886 |
| Mtss1       | 5434.03782 | -0.5548853 | 0.23377987 | -2.3735377 | 0.01761859 | 0.11358867 |
| Bcar3       | 2717.43992 | -0.5549661 | 0.23388051 | -2.3728617 | 0.01765087 | 0.11365993 |
| Rnase12     | 14.3738333 | -0.5550174 | 0.42958275 | -1.2919918 | 0.19635999 | 0.47933634 |
| Oip5        | 3043.18503 | -0.5552332 | 0.16749217 | -3.3149799 | 0.0009165  | 0.01369111 |
| Npm1        | 274751.986 | -0.555235  | 0.17921184 | -3.0982051 | 0.00194697 | 0.0239725  |
| Pbrm1       | 7530.61093 | -0.5553322 | 0.26515015 | -2.0944065 | 0.03622379 | 0.18058504 |
| Catsperg1   | 59.5652206 | -0.5556487 | 0.41262272 | -1.3466264 | 0.17810058 | 0.4556391  |
| Dync2li1    | 1163.04564 | -0.5556506 | 0.3027752  | -1.8351918 | 0.06647728 | 0.26137959 |
| Nsg2        | 99.2938124 | -0.555884  | 0.42634064 | -1.3038495 | 0.19228492 | 0.4751259  |
| Csnk2a1     | 12207.169  | -0.5559771 | 0.1547471  | -3.5928113 | 0.00032713 | 0.00629603 |
| Zfp449      | 547.02295  | -0.5562091 | 0.21622911 | -2.5723138 | 0.01010213 | 0.07804182 |
| Ttc5        | 3675.14287 | -0.5563334 | 0.16297181 | -3.4136785 | 0.00064092 | 0.01056468 |
| Unc5b       | 1385.80493 | -0.5566733 | 0.37289403 | -1.4928458 | 0.13547756 | 0.39321069 |
| Tma16       | 1830.67106 | -0.5567345 | 0.25024387 | -2.2247677 | 0.02609683 | 0.14613366 |
| Dctn6       | 1895.54999 | -0.5568317 | 0.21294188 | -2.614947  | 0.00892413 | 0.07148561 |
| Tpd52       | 13143.2481 | -0.5569509 | 0.20124942 | -2.7674658 | 0.0056494  | 0.05158766 |
| Notch1      | 3461.56285 | -0.5574943 | 0.2690299  | -2.0722392 | 0.03824314 | 0.1864323  |
| Ift140      | 1997.41961 | -0.557673  | 0.18939117 | -2.9445564 | 0.00323418 | 0.0345906  |
| Dmrt1       | 1142.97228 | -0.5577771 | 0.33143845 | -1.6828979 | 0.09239486 | 0.31658914 |
| A230046K03f | 7835.23633 | -0.5579521 | 0.22260271 | -2.5064928 | 0.01219355 | 0.08825721 |
| Pdzk1       | 317.678128 | -0.5580567 | 0.42195101 | -1.3225627 | 0.18598083 | 0.46656448 |
| Nubpl       | 1623.95368 | -0.5585758 | 0.25849925 | -2.1608409 | 0.03070763 | 0.16176637 |
| Nthl1       | 1026.05001 | -0.5586941 | 0.24653825 | -2.2661559 | 0.02344184 | 0.13676785 |
| Mdc1        | 13127.0972 | -0.5587185 | 0.20398271 | -2.7390482 | 0.00616173 | 0.05463006 |
| AW551984    | 22.6975782 | -0.5590119 | 0.43050101 | -1.2985148 | 0.19411049 | 0.47681405 |

|             |            |            |            |            |            |            |
|-------------|------------|------------|------------|------------|------------|------------|
| Hopx        | 241.560279 | -0.5594583 | 0.4117618  | -1.3586939 | 0.17424359 | 0.45152826 |
| Zfp53       | 985.043713 | -0.5598207 | 0.170479   | -3.2838103 | 0.00102414 | 0.01481523 |
| Ccnt2       | 7222.98401 | -0.5603533 | 0.19878469 | -2.8188959 | 0.00481891 | 0.04566662 |
| Smim7       | 4470.46761 | -0.5604233 | 0.19166118 | -2.9240313 | 0.0034553  | 0.03613847 |
| Ndufaf3     | 990.20947  | -0.5604693 | 0.20688518 | -2.709084  | 0.00674693 | 0.05860383 |
| Pacsin3     | 658.712523 | -0.5607831 | 0.23545666 | -2.3816828 | 0.01723373 | 0.11166741 |
| Gm12522     | 25.2592376 | -0.5609911 | 0.42045158 | -1.3342585 | 0.18211914 | 0.46138929 |
| Dach2       | 58.0367165 | -0.5612526 | 0.35556905 | -1.5784632 | 0.11445924 | 0.35850064 |
| Spib        | 23.7144155 | -0.561325  | 0.43177974 | -1.3000262 | 0.19359197 | 0.47620196 |
| Dpysl4      | 132.537917 | -0.5613274 | 0.42828853 | -1.3106292 | 0.18998308 | 0.4716518  |
| Gnb2l1      | 175148.032 | -0.5613428 | 0.2217153  | -2.5318181 | 0.01134728 | 0.08418971 |
| Hacl1       | 657.358464 | -0.5615575 | 0.29231739 | -1.9210539 | 0.05472491 | 0.23195068 |
| Dis3l2      | 2510.90589 | -0.5617142 | 0.17519343 | -3.2062513 | 0.00134476 | 0.01810197 |
| Pds5a       | 12878.1843 | -0.5617802 | 0.23791369 | -2.3612773 | 0.01821211 | 0.11619705 |
| Tarm1       | 83.4530158 | -0.5621821 | 0.40899624 | -1.3745409 | 0.16927382 | 0.44438521 |
| Ptprd       | 116.936997 | -0.562683  | 0.39076055 | -1.4399687 | 0.14987625 | 0.41582971 |
| Zfp72       | 560.456936 | -0.5628184 | 0.21517904 | -2.615582  | 0.00890755 | 0.07141612 |
| Mgat3       | 1789.86458 | -0.5631205 | 0.24433737 | -2.3046842 | 0.02118427 | 0.12878676 |
| 9430038l01R | 626.266085 | -0.5634308 | 0.21189435 | -2.6590175 | 0.00783689 | 0.06548708 |
| Eef1a1      | 547447.455 | -0.5638565 | 0.1476909  | -3.8178144 | 0.00013464 | 0.00312503 |
| Zfp59       | 3630.46452 | -0.5639043 | 0.17722666 | -3.1818255 | 0.0014635  | 0.01927085 |
| Npc1l1      | 44.6788621 | -0.5640485 | 0.4260451  | -1.3239174 | 0.18553047 | 0.46609532 |
| ltgae       | 292.376524 | -0.5641885 | 0.24808302 | -2.2741922 | 0.02295443 | 0.1351279  |
| 9430037G07l | 55.0516477 | -0.56478   | 0.3901017  | -1.4477763 | 0.14767963 | 0.41238389 |
| Med14       | 2680.79814 | -0.5648601 | 0.24766331 | -2.2807581 | 0.02256277 | 0.13361523 |
| Ubox5       | 1238.71082 | -0.565149  | 0.18660536 | -3.0285784 | 0.00245707 | 0.0282618  |
| Stbd1       | 10.1001638 | -0.5652145 | 0.42952465 | -1.315907  | 0.18820526 | 0.46953088 |
| Hormad2     | 1073.80075 | -0.5652561 | 0.27895015 | -2.0263695 | 0.04272693 | 0.1991746  |
| Slc38a2     | 12850.8302 | -0.5653512 | 0.27443748 | -2.0600363 | 0.03939507 | 0.18961086 |
| Efcab6      | 19.0429052 | -0.5654342 | 0.36023307 | -1.5696344 | 0.11650019 | 0.3624409  |
| Cars2       | 1878.89597 | -0.5657216 | 0.29693643 | -1.9051942 | 0.05675484 | 0.23754762 |
| Lpar2       | 914.689587 | -0.5667525 | 0.22971159 | -2.4672351 | 0.01361609 | 0.09516577 |
| Fcgbp       | 19.8489811 | -0.5668072 | 0.42312753 | -1.3395658 | 0.18038656 | 0.45896455 |
| Nup37       | 3532.2691  | -0.5668383 | 0.16935574 | -3.3470276 | 0.00081683 | 0.01267718 |
| Myrf        | 176.244586 | -0.5670937 | 0.36966699 | -1.5340664 | 0.12501333 | 0.37793201 |
| Tpi1        | 27838.4218 | -0.5673952 | 0.27097059 | -2.0939364 | 0.03626565 | 0.18058504 |
| Mtf2        | 39513.6373 | -0.5675885 | 0.20978313 | -2.7055966 | 0.00681818 | 0.0588726  |
| Gnai2       | 20094.586  | -0.5676488 | 0.21814041 | -2.6022176 | 0.00926231 | 0.07345136 |
| Zfp595      | 518.787572 | -0.567997  | 0.24304187 | -2.3370335 | 0.01943744 | 0.12124816 |
| Ldhd        | 210.463685 | -0.5680037 | 0.36361876 | -1.5620857 | 0.11826781 | 0.36545911 |
| Chit1       | 366.373406 | -0.5682117 | 0.39451118 | -1.4402931 | 0.14978449 | 0.4156493  |

|             |            |            |            |            |            |            |
|-------------|------------|------------|------------|------------|------------|------------|
| Zfp260      | 4831.24393 | -0.5682652 | 0.16273026 | -3.4920685 | 0.0004793  | 0.00838417 |
| Sbk1        | 4587.25955 | -0.5685939 | 0.28106078 | -2.0230283 | 0.04307023 | 0.20005532 |
| Mllt4       | 10899.3169 | -0.5686951 | 0.19199892 | -2.9619704 | 0.00305677 | 0.03314913 |
| Gdap10      | 185.313245 | -0.569121  | 0.34150547 | -1.6665062 | 0.09561264 | 0.32309262 |
| Rlf         | 7629.41221 | -0.5692778 | 0.17030769 | -3.3426429 | 0.00082985 | 0.01281523 |
| Shb         | 465.047833 | -0.5702113 | 0.26324448 | -2.1660901 | 0.0303043  | 0.16040239 |
| 5730455P16F | 1624.21878 | -0.5702553 | 0.18201303 | -3.1330466 | 0.00173002 | 0.02180189 |
| Lgalsl      | 3943.78631 | -0.5704017 | 0.21068002 | -2.7074314 | 0.00678061 | 0.05866229 |
| Sstr5       | 307.655333 | -0.5704867 | 0.40235041 | -1.4178852 | 0.15622427 | 0.4250995  |
| Sall1       | 10675.9209 | -0.5705561 | 0.2806236  | -2.0331723 | 0.04203512 | 0.19707211 |
| Tmem47      | 1857.45677 | -0.5707817 | 0.25332657 | -2.2531459 | 0.02424995 | 0.13982331 |
| lpo7        | 24268.6242 | -0.571189  | 0.19946118 | -2.8636599 | 0.00418777 | 0.04103596 |
| Blm         | 10406.6273 | -0.5714461 | 0.16622157 | -3.4378576 | 0.00058634 | 0.00982555 |
| Nbn         | 3538.84872 | -0.5714968 | 0.16839083 | -3.3938715 | 0.00068912 | 0.01111671 |
| 2410124H12I | 43.1390871 | -0.5718013 | 0.42984792 | -1.330241  | 0.18343887 | 0.46369601 |
| Fcgrt       | 2232.06026 | -0.5718582 | 0.2783746  | -2.0542759 | 0.03994899 | 0.19115781 |
| Arrb1       | 443.964272 | -0.5720802 | 0.20646315 | -2.7708588 | 0.00559087 | 0.05125204 |
| Inpp5f      | 708.750736 | -0.5722593 | 0.42204396 | -1.3559233 | NA         | NA         |
| Sh3rf2      | 481.685595 | -0.5722829 | 0.31895352 | -1.7942518 | 0.07277298 | 0.27508329 |
| 1700066B17F | 4.28505263 | -0.5722921 | 0.33537136 | -1.706443  | 0.08792563 | NA         |
| Gins1       | 3762.29088 | -0.5723625 | 0.18103468 | -3.1616178 | 0.00156895 | 0.02019768 |
| Arvcf       | 3984.65114 | -0.5724758 | 0.2034257  | -2.8141762 | 0.00489024 | 0.04611774 |
| Lynx1       | 50.3194048 | -0.5724864 | 0.37731396 | -1.5172681 | 0.12919901 | 0.38423673 |
| Dppa3       | 5432.49946 | -0.5725429 | 0.43046028 | -1.3300713 | 0.18349478 | 0.46376196 |
| Mtftp1      | 632.359061 | -0.5726443 | 0.27747121 | -2.0637972 | 0.03903695 | 0.18847055 |
| Nup88       | 17871.4536 | -0.5726679 | 0.17915191 | -3.1965492 | 0.00139082 | 0.01862933 |
| Dhdh        | 1209.51021 | -0.5726793 | 0.18709926 | -3.0608313 | 0.00220723 | 0.02628231 |
| Zfp108      | 127.507132 | -0.5727838 | 0.26531096 | -2.1589147 | 0.03085678 | 0.16227724 |
| Ddx3x       | 58542.4206 | -0.5727877 | 0.17789487 | -3.2198098 | 0.00128276 | 0.01752913 |
| Pitx2       | 189.244291 | -0.5728861 | 0.35114073 | -1.6315    | 0.10278487 | 0.33693244 |
| Efcab4a     | 123.22064  | -0.5729264 | 0.32440777 | -1.7660686 | 0.07738434 | 0.28561324 |
| Kansl1l     | 290.234017 | -0.5732746 | 0.2850491  | -2.0111435 | 0.0443103  | 0.20355129 |
| 1500011B03F | 627.648226 | -0.5734758 | 0.19303034 | -2.97091   | 0.00296919 | 0.03258564 |
| Zc2hc1c     | 72.2401302 | -0.5737362 | 0.33028054 | -1.7371179 | 0.08236636 | 0.29691219 |
| Incenp      | 8663.63165 | -0.5740894 | 0.19576569 | -2.9325332 | 0.00336209 | 0.03539638 |
| Elp2        | 12916.3646 | -0.5742382 | 0.16150801 | -3.555478  | 0.00037729 | 0.00698485 |
| Ddx19b      | 7326.7852  | -0.5743478 | 0.19512131 | -2.943542  | 0.0032448  | 0.03461858 |
| Stra13      | 1847.07654 | -0.5744897 | 0.2288703  | -2.5101106 | 0.01206934 | 0.08770573 |
| Efr3b       | 374.78119  | -0.5750515 | 0.2955957  | -1.9453987 | 0.05172702 | 0.224078   |
| Tnk1        | 820.57008  | -0.5751193 | 0.37737383 | -1.5240041 | 0.12750768 | 0.38154165 |
| Zfp606      | 1598.80736 | -0.5751573 | 0.17864692 | -3.2195199 | 0.00128405 | 0.01753146 |



|             |            |            |            |            |            |            |
|-------------|------------|------------|------------|------------|------------|------------|
| Zfp791      | 264.475154 | -0.5754878 | 0.34134944 | -1.6859199 | 0.09181123 | 0.31542255 |
| Slc26a5     | 43.038604  | -0.5762521 | 0.42432238 | -1.3580527 | NA         | NA         |
| Fam129c     | 222.499816 | -0.5766001 | 0.27023705 | -2.1336827 | 0.03286876 | 0.16924764 |
| Gm14124     | 1016.69573 | -0.5766914 | 0.28752477 | -2.0057101 | 0.04488718 | 0.20542689 |
| Thnsl1      | 1208.15545 | -0.577072  | 0.23375314 | -2.4687242 | 0.01355957 | 0.09491533 |
| Sit1        | 9.47183442 | -0.577115  | 0.39056373 | -1.4776463 | 0.13950248 | 0.39944817 |
| Smc3        | 20269.1234 | -0.5772379 | 0.18616056 | -3.100753  | 0.00193029 | 0.02384272 |
| Zfp652      | 1499.12787 | -0.5773223 | 0.2406259  | -2.3992527 | 0.01642857 | 0.10816288 |
| Uck2        | 12046.5304 | -0.577502  | 0.17535647 | -3.2933032 | 0.00099018 | 0.01447202 |
| Cdh23       | 27.3743804 | -0.5776308 | 0.41236272 | -1.4007832 | 0.16127891 | 0.43227306 |
| Cct4        | 50095.2316 | -0.5778613 | 0.17251502 | -3.3496288 | 0.0008092  | 0.01259646 |
| Pip5k1c     | 3782.01783 | -0.5780795 | 0.22518589 | -2.5671214 | 0.01025467 | 0.07876795 |
| Nab2        | 987.891202 | -0.5782317 | 0.25491839 | -2.2683014 | 0.02331084 | 0.13636812 |
| Aldh3a1     | 156.211727 | -0.578363  | 0.4002754  | -1.4449126 | 0.14848243 | 0.41357758 |
| Arrb2       | 2394.59639 | -0.5787132 | 0.23584984 | -2.4537358 | 0.01413808 | 0.09758601 |
| Fbxo27      | 499.667582 | -0.5789683 | 0.26141635 | -2.2147362 | 0.02677817 | 0.14835319 |
| Zfp184      | 1200.18695 | -0.5790946 | 0.20519392 | -2.822182  | 0.00476981 | 0.04545056 |
| Pnpla1      | 17.0585036 | -0.5791244 | 0.43124496 | -1.3429129 | 0.17930017 | 0.45747284 |
| Utrn        | 8135.20832 | -0.579396  | 0.24758988 | -2.340144  | 0.0192763  | 0.12066388 |
| Rps6ka2     | 2346.54637 | -0.579425  | 0.22846655 | -2.5361481 | 0.01120793 | 0.0835144  |
| Pklr        | 94.3534177 | -0.5794632 | 0.28899866 | -2.0050722 | 0.04495533 | 0.20548551 |
| Mroh4       | 146.127898 | -0.5797432 | 0.38792982 | -1.4944538 | 0.13505706 | 0.39257426 |
| Ccdc88a     | 3350.00626 | -0.5800414 | 0.22164897 | -2.6169372 | 0.00887227 | 0.07126685 |
| 9330159M07  | 69.005638  | -0.5800602 | 0.39147247 | -1.4817396 | 0.1384096  | 0.39777094 |
| 4930539E08F | 678.914954 | -0.5800831 | 0.19410485 | -2.988504  | 0.00280347 | 0.0312074  |
| Smco4       | 263.37698  | -0.5804354 | 0.24667462 | -2.3530406 | 0.0186206  | 0.11769157 |
| Btnl4       | 10.5647162 | -0.5804958 | 0.42118726 | -1.378237  | 0.16813014 | 0.44308872 |
| Trim54      | 204.654052 | -0.5806969 | 0.29133783 | -1.993208  | 0.04623868 | 0.20896764 |
| Cks1b       | 6608.28887 | -0.580732  | 0.16610619 | -3.4961493 | 0.00047202 | 0.00828723 |
| Amigo1      | 387.673887 | -0.5814618 | 0.22300648 | -2.6073761 | 0.00912391 | 0.07259864 |
| Nav2        | 1669.55599 | -0.5816797 | 0.35496722 | -1.6386857 | 0.10127872 | 0.33403721 |
| Itpr3       | 5873.9084  | -0.5823491 | 0.1871358  | -3.1119065 | 0.00185883 | 0.02316243 |
| Plekhh2     | 1100.39986 | -0.5823513 | 0.20419392 | -2.8519522 | 0.00434516 | 0.04225868 |
| Ttf2        | 5923.07539 | -0.5825344 | 0.16381343 | -3.5560846 | 0.00037642 | 0.00698485 |
| Fbln2       | 568.591418 | -0.5827854 | 0.28358982 | -2.0550294 | 0.03987617 | 0.19098069 |
| Nek3        | 982.631386 | -0.5835142 | 0.32086327 | -1.8185757 | 0.06897618 | 0.26716458 |
| Dnajc21     | 9985.87443 | -0.5838413 | 0.176763   | -3.3029609 | 0.0009567  | 0.01407758 |
| Slc39a10    | 10302.0572 | -0.5839391 | 0.19449975 | -3.0022612 | 0.00267982 | 0.0301112  |
| Pola1       | 13203.5616 | -0.5843126 | 0.15930983 | -3.6677748 | 0.00024467 | 0.00498673 |
| Ccna2       | 19291.8693 | -0.5846244 | 0.18313568 | -3.1923019 | 0.00141144 | 0.01880828 |
| Prss56      | 20.4163627 | -0.5846279 | 0.42689698 | -1.3694824 | 0.17084853 | 0.44668216 |

|             |            |            |            |            |            |            |
|-------------|------------|------------|------------|------------|------------|------------|
| Ucma        | 14.655004  | -0.5847283 | 0.42364329 | -1.3802373 | 0.16751359 | 0.44231821 |
| Rps4x       | 77034.8551 | -0.5855771 | 0.19142727 | -3.0590057 | 0.00222073 | 0.02634646 |
| Mapk7       | 2354.4135  | -0.5858426 | 0.22351016 | -2.6211006 | 0.00876464 | 0.07069445 |
| Smc1a       | 16314.8458 | -0.5859369 | 0.14896663 | -3.9333431 | 8.38E-05   | 0.00213722 |
| Kntc1       | 10418.4972 | -0.5859677 | 0.16106224 | -3.6381444 | 0.00027461 | 0.00543315 |
| Pdp1        | 712.861723 | -0.5863805 | 0.30838135 | -1.9014784 | 0.05723937 | 0.23865959 |
| Thoc2       | 8997.76906 | -0.5867171 | 0.23129658 | -2.5366438 | 0.01119208 | 0.08343623 |
| 1810041L15F | 15.2494475 | -0.587031  | 0.43214422 | -1.3584145 | 0.17433219 | 0.45161417 |
| Tnni1       | 533.856544 | -0.5872763 | 0.32115507 | -1.8286379 | 0.06745387 | 0.26356157 |
| Olf985      | 52.0808886 | -0.5873128 | 0.36232738 | -1.6209452 | 0.10502939 | 0.34118393 |
| Fam167a     | 231.985064 | -0.5878863 | 0.31224136 | -1.8827945 | 0.05972822 | 0.24539855 |
| Slc2a5      | 119.359699 | -0.5880419 | 0.32190285 | -1.8267683 | 0.06773461 | 0.26419385 |
| Alg13       | 35792.6565 | -0.5884381 | 0.19262678 | -3.0548096 | 0.00225203 | 0.02659179 |
| 7-Mar       | 10059.9294 | -0.5887129 | 0.19623995 | -2.9999646 | 0.00270011 | 0.03028006 |
| Ogfrl1      | 1022.53297 | -0.5887199 | 0.25667616 | -2.2936293 | 0.0218118  | 0.13072875 |
| G0s2        | 115.094133 | -0.5887691 | 0.35743816 | -1.6471915 | 0.09951868 | 0.32999971 |
| Polh        | 975.326858 | -0.5888429 | 0.22757999 | -2.5874106 | 0.00967003 | 0.07552918 |
| Sp4         | 945.376962 | -0.589043  | 0.26386496 | -2.2323653 | 0.02559083 | 0.14455611 |
| Fn3krp      | 1010.32625 | -0.5892564 | 0.18226027 | -3.2330491 | 0.00122477 | 0.01694513 |
| Ripk2       | 1065.89369 | -0.5895965 | 0.18429954 | -3.1991206 | 0.00137847 | 0.01849582 |
| Mogat2      | 104.35844  | -0.5897253 | 0.33899474 | -1.7396297 | 0.08192406 | 0.29593522 |
| Zfp708      | 613.304984 | -0.5898768 | 0.20336746 | -2.9005464 | 0.00372513 | 0.03793677 |
| Fto         | 4611.65372 | -0.5899979 | 0.20954664 | -2.8155921 | 0.00486874 | 0.04599869 |
| Pdzd2       | 306.938028 | -0.5901791 | 0.34591299 | -1.706149  | 0.08798033 | 0.30877503 |
| Kif27       | 59.0016775 | -0.5902489 | 0.42492181 | -1.3890765 | 0.16480949 | 0.43811151 |
| Rusc2       | 2235.10486 | -0.5902725 | 0.24677271 | -2.3919683 | 0.01675829 | 0.10956306 |
| Foxm1       | 3589.16499 | -0.5904382 | 0.22641174 | -2.6078071 | 0.00911243 | 0.07259599 |
| Atad1       | 6860.66991 | -0.5907394 | 0.16323662 | -3.6189145 | 0.00029584 | 0.00577968 |
| Igf1r       | 1165.38934 | -0.5911357 | 0.25456467 | -2.3221436 | 0.02022521 | 0.12485994 |
| Rabl6       | 4304.81259 | -0.591422  | 0.16813575 | -3.5175268 | 0.00043559 | 0.00780396 |
| Fam149b     | 1632.63151 | -0.5915457 | 0.17774269 | -3.3281014 | 0.0008744  | 0.01329208 |
| Ifih1       | 29.2684261 | -0.5915755 | 0.4002346  | -1.4780718 | NA         | NA         |
| Drd2        | 8.64767437 | -0.5918406 | 0.41500058 | -1.4261198 | 0.15383376 | 0.42169378 |
| Parp2       | 4235.10881 | -0.5922163 | 0.16835345 | -3.5176961 | 0.00043531 | 0.00780396 |
| Rimkb       | 3497.17929 | -0.5926425 | 0.19810444 | -2.9915658 | 0.00277551 | 0.03094044 |
| Nrbp2       | 141.214917 | -0.5926746 | 0.30416506 | -1.9485296 | 0.05135162 | 0.22301711 |
| Oas1d       | 69.7942497 | -0.5928128 | 0.3480699  | -1.7031428 | 0.08854135 | 0.30976524 |
| Rcan2       | 41.9599353 | -0.5929338 | 0.40974426 | -1.4470826 | 0.14787379 | 0.41285195 |
| E2f4        | 7461.18549 | -0.5931754 | 0.25408027 | -2.3345984 | 0.01956441 | 0.1217959  |
| E130112N10I | 36.6624707 | -0.5935228 | 0.38894719 | -1.5259728 | 0.12701665 | 0.38080506 |
| Grb7        | 736.706643 | -0.5936696 | 0.36177532 | -1.6409899 | 0.10079952 | 0.33279315 |

|             |            |            |            |            |            |            |
|-------------|------------|------------|------------|------------|------------|------------|
| Cd164l2     | 87.0340711 | -0.5938871 | 0.39021245 | -1.5219584 | 0.12801949 | 0.38211884 |
| Prex1       | 1028.57828 | -0.5939086 | 0.22204635 | -2.6747053 | 0.0074795  | 0.06311104 |
| Stk32b      | 3.9910922  | -0.5940477 | 0.36796795 | -1.6144007 | 0.10644053 | NA         |
| Zfp760      | 1851.52726 | -0.5942442 | 0.20112962 | -2.9545333 | 0.00313142 | 0.0338344  |
| Gm21284     | 29.1553039 | -0.5944161 | 0.39453923 | -1.5066083 | 0.13191109 | 0.38843399 |
| Zfp382      | 382.885421 | -0.5946159 | 0.25250202 | -2.3548955 | 0.01852791 | 0.11733675 |
| Nrarp       | 370.899092 | -0.5951458 | 0.25868347 | -2.3006721 | 0.02141017 | 0.12925061 |
| Hs3st6      | 31.2311514 | -0.5953085 | 0.43211185 | -1.3776722 | 0.16830452 | 0.44322322 |
| Aspscr1     | 7965.11863 | -0.5954069 | 0.20468778 | -2.908854  | 0.00362756 | 0.03735909 |
| Qsox2       | 2285.83575 | -0.5954209 | 0.27764431 | -2.1445458 | 0.03198918 | 0.1664297  |
| Igip        | 122.49988  | -0.5956266 | 0.34910078 | -1.7061737 | 0.08797574 | 0.30877503 |
| Copg2       | 7547.72056 | -0.5956588 | 0.17532003 | -3.3975516 | 0.00067992 | 0.01102544 |
| Zfp964      | 116.532931 | -0.5956878 | 0.33647938 | -1.7703545 | 0.0766681  | 0.28423856 |
| Atp7b       | 250.977364 | -0.5959678 | 0.29082348 | -2.0492423 | 0.04043843 | 0.19269956 |
| Tnks        | 5018.32827 | -0.5962186 | 0.32936597 | -1.8102008 | 0.07026465 | 0.26987118 |
| Hspa12a     | 213.482085 | -0.5978753 | 0.31316925 | -1.9091124 | 0.0562476  | 0.2362156  |
| Rasgrp2     | 940.697283 | -0.5980877 | 0.37407147 | -1.5988594 | 0.10985185 | 0.35030265 |
| Dhcr7       | 6119.46286 | -0.5981598 | 0.1702326  | -3.5137794 | 0.00044178 | 0.00788762 |
| Entpd3      | 76.7510385 | -0.5984082 | 0.39414426 | -1.5182465 | 0.12895226 | 0.38379957 |
| Fam84a      | 21.7980905 | -0.5989363 | 0.42735902 | -1.4014828 | 0.16106976 | 0.43209007 |
| Pim1        | 7596.74532 | -0.5992315 | 0.18061772 | -3.3176785 | 0.00090769 | 0.01360208 |
| Smtn        | 1648.8156  | -0.5998454 | 0.20955431 | -2.8624819 | 0.00420337 | 0.04113698 |
| Zic3        | 3305.1352  | -0.6003039 | 0.30334451 | -1.9789509 | 0.04782153 | 0.2135883  |
| Gm16576     | 62.1165986 | -0.6006814 | 0.36597764 | -1.6413061 | 0.10073388 | 0.33279315 |
| Scd4        | 14.0423248 | -0.6011529 | 0.42711743 | -1.4074652 | 0.15928949 | 0.43014212 |
| Grk6        | 4385.43021 | -0.6014063 | 0.16629219 | -3.6165634 | 0.00029854 | 0.00581779 |
| Gm16897     | 5.79117111 | -0.6016239 | 0.37387381 | -1.609163  | 0.1075807  | NA         |
| Spc24       | 5656.82495 | -0.6017315 | 0.21482077 | -2.8010864 | 0.00509309 | 0.04759773 |
| Cenpa       | 8613.64428 | -0.6018781 | 0.19826442 | -3.0357342 | 0.00239951 | 0.02786762 |
| Parpbp      | 1933.23673 | -0.6019334 | 0.18737836 | -3.2123957 | 0.00131633 | 0.01778474 |
| Kxd1        | 2910.16611 | -0.6022634 | 0.19531468 | -3.0835542 | 0.00204544 | 0.02486991 |
| Rpl4        | 240775.021 | -0.6024499 | 0.19006135 | -3.1697655 | 0.00152562 | 0.01982031 |
| 4930538K18F | 12.7960663 | -0.6025895 | 0.42898479 | -1.4046874 | 0.16011425 | 0.43144633 |
| Tm4sf5      | 98.2134899 | -0.6027348 | 0.3988576  | -1.5111529 | 0.13074951 | 0.38666893 |
| Katnal2     | 114.614899 | -0.6034435 | 0.36650415 | -1.6464847 | 0.09966401 | 0.33009875 |
| Ptp4a3      | 1774.48925 | -0.603835  | 0.19155885 | -3.1522169 | 0.00162036 | 0.02075634 |
| Sin3b       | 11336.9031 | -0.6039137 | 0.21857529 | -2.7629549 | 0.00572807 | 0.05209191 |
| Agpat3      | 2233.70765 | -0.6040282 | 0.20790507 | -2.9053077 | 0.00366892 | 0.03761069 |
| Idi1        | 1060.15932 | -0.6042915 | 0.2131691  | -2.8347988 | 0.00458545 | 0.04404472 |
| Nampt       | 16202.749  | -0.6043099 | 0.18127234 | -3.3337126 | 0.00085695 | 0.01310369 |
| Gabrp       | 56.5048638 | -0.6048344 | 0.42292557 | -1.4301203 | 0.1526825  | 0.42030588 |

|              |            |            |            |            |            |            |
|--------------|------------|------------|------------|------------|------------|------------|
| Sft2d2       | 1343.1602  | -0.6048899 | 0.18632533 | -3.2464178 | 0.00116867 | 0.01644026 |
| Cib3         | 18.4524524 | -0.6050433 | 0.43127515 | -1.4029171 | 0.16064157 | 0.43208565 |
| Gm11961      | 29.7447343 | -0.6052216 | 0.39909018 | -1.5165034 | 0.1293921  | 0.38455938 |
| Zc2hc1a      | 1503.95077 | -0.6055315 | 0.16512496 | -3.6671108 | 0.00024531 | 0.00499314 |
| Efnb1        | 208.29064  | -0.605618  | 0.25487735 | -2.3761153 | 0.017496   | 0.11294322 |
| Zkscan17     | 3094.58232 | -0.6056245 | 0.22893415 | -2.645409  | 0.00815922 | 0.06752746 |
| Zfp619       | 228.340448 | -0.605748  | 0.30015337 | -2.0181281 | 0.04357792 | 0.20151063 |
| Ankrd37      | 473.99164  | -0.6059723 | 0.31449042 | -1.9268386 | 0.05399975 | 0.23019466 |
| Parp10       | 310.855596 | -0.6065725 | 0.36114733 | -1.6795707 | 0.09304087 | 0.31749931 |
| Prr11        | 2535.69513 | -0.6065982 | 0.20473638 | -2.9628256 | 0.00304829 | 0.03312648 |
| Rab11fip4os1 | 8.86228053 | -0.6066219 | 0.42477308 | -1.4281082 | 0.15326071 | 0.4210512  |
| Pank4        | 1822.23916 | -0.6068877 | 0.17713449 | -3.4261409 | 0.00061222 | 0.01021532 |
| Gm10509      | 343.870369 | -0.607536  | 0.19956008 | -3.0443765 | 0.00233163 | 0.02730362 |
| Tubg2        | 128.930842 | -0.6075703 | 0.29877826 | -2.0335157 | 0.04200044 | 0.19696891 |
| Trim14       | 21.1107606 | -0.608262  | 0.42000678 | -1.4482195 | 0.14755568 | 0.41218582 |
| 1190002F15F  | 303.894165 | -0.6084266 | 0.33697242 | -1.8055679 | 0.07098586 | 0.27115393 |
| Ccdc18       | 2766.6111  | -0.6085659 | 0.20054976 | -3.0344883 | 0.00240944 | 0.02792043 |
| Cdkn3        | 667.988446 | -0.6087218 | 0.260612   | -2.3357397 | 0.01950481 | 0.12161962 |
| Slc17a5      | 654.569214 | -0.6090149 | 0.28565608 | -2.1319864 | 0.03300796 | 0.16974377 |
| Prickle2     | 1515.07829 | -0.6093242 | 0.31201203 | -1.9528869 | 0.050833   | 0.22167808 |
| Ccdc37       | 50.7302447 | -0.6094506 | 0.41380945 | -1.4727807 | 0.14081017 | 0.401182   |
| Dusp10       | 234.704869 | -0.6095286 | 0.29127822 | -2.0925992 | 0.03638495 | 0.18092748 |
| Zdhhc9       | 917.515639 | -0.609598  | 0.26859045 | -2.2696191 | 0.02323071 | 0.13622199 |
| Galp         | 20.6967194 | -0.610386  | 0.43012281 | -1.419097  | 0.15587074 | 0.4245089  |
| Cks2         | 4249.29617 | -0.6104232 | 0.1763392  | -3.4616422 | 0.00053689 | 0.00915481 |
| Gsr          | 17153.7991 | -0.6104752 | 0.18848034 | -3.2389332 | 0.00119978 | 0.01673339 |
| Eef2         | 203959.341 | -0.6106452 | 0.18290364 | -3.338617  | 0.00084197 | 0.01294475 |
| Ankrd6       | 1008.27459 | -0.6106623 | 0.29875684 | -2.0440112 | 0.04095244 | 0.19386647 |
| Mgat5b       | 544.60491  | -0.6110357 | 0.20385854 | -2.9973513 | 0.00272337 | 0.0304465  |
| Sh3d19       | 6722.66711 | -0.6114592 | 0.19481143 | -3.1387233 | 0.00169686 | 0.02141867 |
| 1700029P11F  | 430.036096 | -0.6117053 | 0.3571062  | -1.7129508 | 0.08672159 | 0.30622332 |
| Casp8ap2     | 7429.87768 | -0.6120353 | 0.20941814 | -2.9225515 | 0.00347176 | 0.03616167 |
| Dcaf17       | 3748.89583 | -0.6129724 | 0.1877647  | -3.2645773 | 0.00109628 | 0.01568723 |
| Rcor2        | 8732.59321 | -0.6131223 | 0.28135519 | -2.1791753 | 0.02931865 | 0.15701257 |
| Slco4c1      | 481.225569 | -0.6134118 | 0.42921415 | -1.429151  | 0.15296085 | 0.42063558 |
| Grina        | 877.772727 | -0.6142245 | 0.27560611 | -2.2286318 | 0.02583841 | 0.14538871 |
| Iqgap3       | 4304.38143 | -0.6143562 | 0.19847529 | -3.0953789 | 0.00196562 | 0.02412573 |
| Dnajc6       | 6323.97656 | -0.6144967 | 0.27388929 | -2.2435953 | 0.02485845 | 0.14201829 |
| Mutyh        | 1378.71062 | -0.6149011 | 0.18555817 | -3.3137917 | 0.0009204  | 0.01373623 |
| Slc4a5       | 3513.73115 | -0.6151824 | 0.21166877 | -2.9063446 | 0.00365678 | 0.03756054 |
| Ube2e1       | 2010.35349 | -0.6152303 | 0.23723161 | -2.5933739 | 0.00950394 | 0.07456899 |

|             |            |            |            |            |            |            |
|-------------|------------|------------|------------|------------|------------|------------|
| Mri1        | 1609.77771 | -0.6153629 | 0.19927649 | -3.0879853 | 0.00201518 | 0.02459822 |
| 1700001L05F | 2913.71848 | -0.6158099 | 0.18994085 | -3.2421141 | 0.00118647 | 0.01663726 |
| Ect2        | 15848.7863 | -0.6159636 | 0.20336301 | -3.0288872 | 0.00245456 | 0.0282618  |
| Tfrc        | 41357.9607 | -0.6160339 | 0.18888195 | -3.2614757 | 0.00110834 | 0.01578369 |
| 4930427A07f | 2569.75663 | -0.6167638 | 0.21459178 | -2.874126  | 0.00405147 | 0.0401463  |
| Dcdc2a      | 610.758447 | -0.6167715 | 0.34035608 | -1.812136  | 0.06996519 | 0.26937713 |
| 2610305D13f | 12012.2737 | -0.6171634 | 0.29871658 | -2.06605   | 0.03882376 | 0.18832092 |
| Mid1ip1     | 1152.31403 | -0.6175993 | 0.30030428 | -2.0565784 | 0.03972679 | 0.19049997 |
| Kif5a       | 2417.65228 | -0.617774  | 0.24381889 | -2.5337413 | 0.0112852  | 0.083927   |
| Nr1h2       | 4489.3994  | -0.6183826 | 0.16856716 | -3.6684643 | 0.00024401 | 0.00497983 |
| Neurod1     | 61.1037399 | -0.6186044 | 0.41102269 | -1.5050372 | 0.13231451 | 0.38867075 |
| Zfp30       | 478.10813  | -0.6187391 | 0.24369624 | -2.5389767 | 0.01111772 | 0.08300131 |
| Zfp759      | 585.305968 | -0.6187843 | 0.24558774 | -2.5196059 | 0.01174863 | 0.08605886 |
| A930013F10f | 160.221225 | -0.6190643 | 0.3253464  | -1.9027852 | 0.05706858 | 0.23824792 |
| Zfp143      | 3387.78246 | -0.619126  | 0.15856191 | -3.9046328 | 9.44E-05   | 0.00233682 |
| Melk        | 5889.28612 | -0.6192145 | 0.15357738 | -4.0319386 | 5.53E-05   | 0.00150659 |
| Mettl24     | 8.78128181 | -0.6192651 | 0.41526452 | -1.4912545 | 0.13589469 | 0.39361713 |
| Mir106b     | 6.75825034 | -0.6205544 | 0.42441284 | -1.4621481 | 0.14370063 | 0.40532857 |
| Tpx2        | 18348.5397 | -0.6207234 | 0.14955744 | -4.150401  | 3.32E-05   | 0.001014   |
| Tmem139     | 38.2335545 | -0.6208253 | 0.41708106 | -1.4885003 | 0.13661901 | 0.39482664 |
| Slc23a2     | 5660.54577 | -0.6208353 | 0.29452809 | -2.1078983 | 0.03503978 | 0.17680198 |
| Ikzf2       | 57.8664596 | -0.6208811 | 0.33186976 | -1.8708578 | 0.0613648  | 0.24948601 |
| Zfp799      | 1783.43792 | -0.6209455 | 0.17884471 | -3.4719815 | 0.00051663 | 0.00887751 |
| Aoc3        | 80.8541846 | -0.6211528 | 0.38635054 | -1.6077442 | 0.10789121 | 0.34694298 |
| Olfr701     | 16.3479822 | -0.6211782 | 0.33723384 | -1.8419807 | NA         | NA         |
| Hemk1       | 1185.69648 | -0.6214498 | 0.2635973  | -2.3575727 | 0.01839485 | 0.1168539  |
| Fgf10       | 584.297468 | -0.6216204 | 0.43176308 | -1.4397257 | 0.14994501 | 0.41594628 |
| Chek1       | 8059.94123 | -0.6219319 | 0.18172956 | -3.4222937 | 0.00062095 | 0.01030568 |
| Gas5        | 26326.8229 | -0.6219794 | 0.22160923 | -2.8066494 | 0.00500597 | 0.04703796 |
| Dmbx1       | 132.229116 | -0.6220791 | 0.36136046 | -1.7214918 | 0.08516162 | 0.30263903 |
| Mboat4      | 4.24319214 | -0.6223405 | 0.35826862 | -1.7370778 | 0.08237344 | NA         |
| Fbxo24      | 138.074832 | -0.6225053 | 0.25653784 | -2.4265631 | 0.0152426  | 0.10263148 |
| Gm1631      | 319.699713 | -0.6231815 | 0.36049811 | -1.7286679 | 0.08386855 | 0.2998942  |
| Mgl2        | 131.32216  | -0.6235303 | 0.29461967 | -2.1163905 | 0.03431161 | 0.17386116 |
| Anxa6       | 6378.57111 | -0.6237866 | 0.25874472 | -2.4108189 | 0.01591675 | 0.10573319 |
| Pou6f1      | 636.728292 | -0.6242893 | 0.25722354 | -2.4270303 | 0.01522298 | 0.10261491 |
| EU599041    | 2305.79804 | -0.6243983 | 0.17187171 | -3.6329323 | 0.00028022 | 0.00552304 |
| Palm        | 1686.13914 | -0.6247496 | 0.19696103 | -3.1719452 | 0.00151422 | 0.01970508 |
| Adamts9     | 1352.47183 | -0.6247653 | 0.31822347 | -1.9632911 | 0.04961236 | 0.21868531 |
| Rnf165      | 350.455578 | -0.6251923 | 0.31706595 | -1.9718051 | 0.04863186 | 0.21577978 |
| Gclc        | 4467.57057 | -0.6252528 | 0.21114628 | -2.9612307 | 0.00306412 | 0.0332057  |

|             |            |            |            |            |            |            |
|-------------|------------|------------|------------|------------|------------|------------|
| Gm13154     | 11441.021  | -0.6253097 | 0.2210542  | -2.8287619 | 0.00467285 | 0.04475468 |
| Triobp      | 2526.4458  | -0.6258696 | 0.2440314  | -2.5647094 | 0.01032622 | 0.07906603 |
| Cldn6       | 802.02559  | -0.6258696 | 0.36735392 | -1.7037239 | 0.08843268 | 0.30966373 |
| Tspyl5      | 133.393935 | -0.6265577 | 0.30995974 | -2.0214165 | 0.04323667 | 0.20047866 |
| Jakmip1     | 3944.0237  | -0.6266191 | 0.25427776 | -2.4643096 | 0.01372775 | 0.09547055 |
| Slc13a4     | 50.7923644 | -0.6268409 | 0.38393908 | -1.6326572 | 0.10254112 | 0.33648806 |
| Zik1        | 1619.7944  | -0.6268472 | 0.20516749 | -3.055295  | 0.00224839 | 0.02657954 |
| Pigg        | 1038.01291 | -0.6268801 | 0.23314514 | -2.6887974 | 0.00717099 | 0.06113822 |
| Gm9895      | 65.9204487 | -0.6275267 | 0.38123257 | -1.646047  | 0.09975409 | 0.33026949 |
| Plekhg5     | 2228.8183  | -0.6279927 | 0.25943662 | -2.4206015 | 0.01549485 | 0.10358485 |
| Cdc14b      | 2693.03579 | -0.6282008 | 0.27339043 | -2.2978155 | 0.02157229 | 0.1299267  |
| Zfp128      | 176.521027 | -0.6282213 | 0.24277498 | -2.5876692 | 0.00966277 | 0.07552918 |
| Lrrc3       | 34.6354831 | -0.6283152 | 0.40384001 | -1.5558518 | 0.11974333 | 0.36825776 |
| AW554918    | 914.318294 | -0.62865   | 0.21804872 | -2.8830713 | 0.00393818 | 0.03948593 |
| Ttc22       | 3.98129545 | -0.6292573 | 0.37375643 | -1.6836026 | 0.09225849 | NA         |
| Bckdhb      | 2977.85432 | -0.6293399 | 0.21443812 | -2.9348324 | 0.00333728 | 0.0351851  |
| Ripply1     | 42.4823771 | -0.6295654 | 0.42674398 | -1.4752765 | 0.14013821 | 0.40023679 |
| Neil2       | 692.74442  | -0.6295743 | 0.35454849 | -1.7757071 | 0.07578121 | 0.28186405 |
| Insc        | 13.9424837 | -0.6296673 | 0.43180863 | -1.4582092 | 0.14478289 | 0.40736725 |
| Ccdc69      | 45.3360753 | -0.6298115 | 0.41730533 | -1.5092343 | 0.13123892 | 0.3874139  |
| Ccnb1       | 16273.8035 | -0.6298937 | 0.14906958 | -4.2255016 | 2.38E-05   | 0.00076863 |
| Abcb4       | 14.0146881 | -0.6299847 | 0.42979117 | -1.4657925 | 0.14270482 | 0.40393206 |
| Nr4a1       | 1498.46613 | -0.6300485 | 0.29340368 | -2.1473775 | 0.03176324 | 0.16581071 |
| E530001F21F | 11.2820526 | -0.6303802 | 0.43225164 | -1.4583639 | 0.14474025 | 0.40736725 |
| Slc22a20    | 78.6078827 | -0.6306691 | 0.36518107 | -1.7270037 | 0.08416699 | 0.30061573 |
| Foxq1       | 22.7618801 | -0.6318119 | 0.43130351 | -1.4648892 | 0.14295115 | 0.4041144  |
| Klc3        | 383.815016 | -0.6318732 | 0.33634502 | -1.8786459 | 0.06029286 | 0.24693492 |
| Snrnp48     | 3253.56176 | -0.6319988 | 0.18309242 | -3.4518018 | 0.00055686 | 0.00941269 |
| Pfkl        | 13125.8708 | -0.6320134 | 0.28304228 | -2.2329291 | 0.02555362 | 0.14450339 |
| Plekha6     | 490.745574 | -0.6321548 | 0.32599887 | -1.9391319 | 0.05248527 | 0.22665884 |
| Adprhl1     | 7.9349211  | -0.6322907 | 0.41554488 | -1.5215943 | 0.12811076 | 0.38211884 |
| Gm13152     | 2715.57243 | -0.6325387 | 0.20677941 | -3.0590025 | 0.00222075 | 0.02634646 |
| Ninj2       | 31.975829  | -0.6325655 | 0.43015186 | -1.4705633 | 0.14140927 | 0.40183728 |
| Mep1b       | 807.273189 | -0.6327451 | 0.34568408 | -1.8304142 | 0.06718802 | 0.2633085  |
| Sytl3       | 143.787582 | -0.6329391 | 0.36135087 | -1.7515914 | 0.07984409 | 0.29155449 |
| 2410006H16I | 6742.5768  | -0.6330978 | 0.25523075 | -2.4804919 | 0.01312013 | 0.09256078 |
| Slc6a6      | 15115.0318 | -0.6333159 | 0.30656692 | -2.0658325 | 0.0388443  | 0.18832092 |
| Ankrd46     | 2974.09745 | -0.633703  | 0.17097902 | -3.7063205 | 0.00021029 | 0.00446146 |
| Inpp4a      | 411.716792 | -0.6338112 | 0.23253619 | -2.7256454 | 0.00641759 | 0.05626104 |
| Nupr1       | 3850.79448 | -0.6340404 | 0.27686954 | -2.2900332 | 0.02201939 | 0.13144857 |
| Runx1t1     | 117.384001 | -0.6342268 | 0.42826197 | -1.4809318 | 0.13862476 | 0.39796079 |

|             |            |            |            |            |            |            |
|-------------|------------|------------|------------|------------|------------|------------|
| Cd1d1       | 520.837224 | -0.634471  | 0.22019678 | -2.8813816 | 0.00395936 | 0.03962162 |
| Sapcd2      | 1446.47076 | -0.6344972 | 0.20149642 | -3.1489256 | 0.00163872 | 0.02090543 |
| Ccdc85c     | 541.817089 | -0.634802  | 0.27039113 | -2.3477176 | 0.01888884 | 0.11892321 |
| Brca1       | 11499.2063 | -0.6352911 | 0.18881302 | -3.364657  | 0.00076639 | 0.01207096 |
| Prkca       | 240.99161  | -0.6353553 | 0.30869188 | -2.0582183 | 0.03956919 | 0.18991988 |
| Slc7a3      | 10026.6918 | -0.635659  | 0.20239576 | -3.1406735 | 0.0016856  | 0.02133939 |
| Cdca3       | 11674.3837 | -0.6356883 | 0.21335643 | -2.9794664 | 0.00288751 | 0.0318918  |
| Dagla       | 30.6290838 | -0.6359853 | 0.39883214 | -1.594619  | 0.11079746 | 0.35177853 |
| 4931428F04F | 576.688391 | -0.6360097 | 0.22691525 | -2.8028513 | 0.0050653  | 0.04743073 |
| Mab21l3     | 189.780984 | -0.6363915 | 0.25778809 | -2.4686614 | 0.01356195 | 0.09491533 |
| Sfrp4       | 359.036297 | -0.6364612 | 0.22392381 | -2.8423114 | 0.00447877 | 0.04320681 |
| Atp8b3      | 88.4359133 | -0.6366092 | 0.32555599 | -1.9554524 | 0.05052969 | 0.22106118 |
| Fam196b     | 4.84219312 | -0.6367028 | 0.40594942 | -1.5684288 | 0.11678109 | NA         |
| Itsn2       | 3020.17855 | -0.6367506 | 0.24892542 | -2.5579976 | 0.01052768 | 0.07999426 |
| Itgb7       | 796.737123 | -0.6370239 | 0.20015194 | -3.1827016 | 0.00145908 | 0.01922893 |
| Mcam        | 6171.79595 | -0.6379147 | 0.19672498 | -3.2426725 | 0.00118414 | 0.01661967 |
| Hibch       | 1668.12005 | -0.6380823 | 0.23620038 | -2.7014448 | 0.00690389 | 0.05938188 |
| Bcl6        | 269.618968 | -0.6382648 | 0.25632478 | -2.4900628 | 0.01277205 | 0.09077613 |
| Itih5       | 24.01124   | -0.6383523 | 0.4204819  | -1.5181445 | 0.12897798 | 0.38379957 |
| Ly6c1       | 47.6385297 | -0.6383878 | 0.41573299 | -1.5355717 | NA         | NA         |
| Ankrd27     | 4382.64934 | -0.6385273 | 0.16544422 | -3.8594717 | 0.00011363 | 0.00269797 |
| Rax         | 18.366251  | -0.6385771 | 0.42775903 | -1.492843  | 0.13547829 | 0.39321069 |
| Wdsub1      | 838.333191 | -0.6386466 | 0.17244129 | -3.7035597 | 0.0002126  | 0.00447977 |
| Entpd2      | 142.991592 | -0.6387241 | 0.39813794 | -1.6042783 | 0.10865272 | 0.34823958 |
| Gcfc2       | 1449.45846 | -0.6393773 | 0.18241713 | -3.5050287 | 0.00045656 | 0.00809571 |
| Mdm1        | 1743.51113 | -0.6394986 | 0.16875044 | -3.7896113 | 0.00015088 | 0.0034348  |
| Chm         | 4866.94649 | -0.6397309 | 0.23182637 | -2.7595262 | 0.00578852 | 0.05254953 |
| Lmbrd2      | 1073.38148 | -0.6400263 | 0.30875607 | -2.0729189 | 0.03817982 | 0.18618201 |
| Amer1       | 1674.99109 | -0.6400944 | 0.25023929 | -2.5579291 | 0.01052976 | 0.07999426 |
| Bok         | 827.856296 | -0.6403059 | 0.22453325 | -2.8517196 | 0.00434834 | 0.04226319 |
| Sh2d3c      | 280.54269  | -0.6403568 | 0.27715334 | -2.3104784 | 0.02086168 | 0.12747349 |
| Tppp        | 11.8400412 | -0.6409542 | 0.42840043 | -1.4961567 | 0.13461282 | 0.3921626  |
| Fut4        | 18.3163156 | -0.6412481 | 0.42682541 | -1.5023663 | 0.13300253 | 0.38977816 |
| Pcyt2       | 2672.18125 | -0.6422161 | 0.18020128 | -3.5638819 | 0.00036541 | 0.00682992 |
| Cyp4a12b    | 31.5767202 | -0.6425843 | 0.43227123 | -1.4865304 | 0.13713888 | 0.39552055 |
| Slc1a6      | 13.2964238 | -0.6427848 | 0.43222381 | -1.4871574 | 0.13697324 | 0.3951894  |
| Poli        | 2367.6882  | -0.6429445 | 0.17349161 | -3.7059109 | 0.00021063 | 0.00446259 |
| Scaper      | 2033.34258 | -0.6432458 | 0.20060175 | -3.2065813 | 0.00134322 | 0.01810093 |
| Itfg1       | 4576.54251 | -0.6433032 | 0.19079893 | -3.3716293 | 0.00074725 | 0.01184554 |
| Vegfb       | 1429.52431 | -0.6435388 | 0.22104219 | -2.9113845 | 0.00359831 | 0.03715624 |
| Maoa        | 3181.25202 | -0.6435903 | 0.27462597 | -2.3435156 | 0.01910296 | 0.11988304 |

|             |            |            |            |            |            |            |
|-------------|------------|------------|------------|------------|------------|------------|
| Hps3        | 1106.70208 | -0.643948  | 0.36740695 | -1.7526833 | 0.07965638 | 0.29126179 |
| Scoc        | 1183.48803 | -0.6441906 | 0.24196523 | -2.6623273 | 0.00776024 | 0.06495127 |
| Nr1d2       | 1653.84571 | -0.6447122 | 0.23531457 | -2.7397887 | 0.00614787 | 0.05460052 |
| Tmeff1      | 10129.6784 | -0.644847  | 0.24030685 | -2.6834315 | 0.00728709 | 0.06178928 |
| Ccdc61      | 2142.59056 | -0.645204  | 0.21767435 | -2.9640791 | 0.0030359  | 0.03302127 |
| B430306N03  | 28.8632773 | -0.6454194 | 0.42571265 | -1.5160917 | 0.12949617 | 0.38455938 |
| Spdl1       | 3616.36662 | -0.6456648 | 0.18507108 | -3.4887394 | 0.0004853  | 0.00844179 |
| Prmt7       | 7938.75825 | -0.6460681 | 0.202882   | -3.1844527 | 0.00145028 | 0.01912918 |
| Wbp2nl      | 138.897789 | -0.6462907 | 0.2998775  | -2.1551824 | 0.03114756 | 0.16325438 |
| 4930502E09F | 3.70551032 | -0.6469529 | 0.38168863 | -1.6949757 | 0.09008004 | NA         |
| Fam110b     | 805.879103 | -0.6469732 | 0.20598718 | -3.1408421 | 0.00168463 | 0.02133939 |
| St6galnac2  | 539.50325  | -0.6482553 | 0.24052483 | -2.6951699 | 0.00703528 | 0.06024535 |
| Rab39       | 468.773734 | -0.6482641 | 0.40289049 | -1.6090329 | 0.10760915 | 0.34644655 |
| Gstm1       | 3348.01526 | -0.6483206 | 0.22502129 | -2.881152  | 0.00396224 | 0.039625   |
| Cacng1      | 9.41254629 | -0.6483563 | 0.4161636  | -1.5579361 | 0.11924839 | 0.36728692 |
| Zfp781      | 48.4629855 | -0.648677  | 0.42074396 | -1.5417381 | 0.12313725 | 0.37454897 |
| Swt1        | 5250.73895 | -0.6488027 | 0.24958454 | -2.5995309 | 0.00933513 | 0.07382763 |
| Auh         | 970.882959 | -0.6492175 | 0.23104615 | -2.8099039 | 0.00495563 | 0.04664952 |
| Kitl        | 101.346647 | -0.6492305 | 0.38359611 | -1.6924845 | 0.09055364 | 0.31332569 |
| Rasal1      | 596.374226 | -0.6494536 | 0.29728787 | -2.1845951 | 0.02891855 | 0.15593356 |
| Mir6516     | 405.31137  | -0.6495388 | 0.4115548  | -1.5782558 | 0.11450685 | 0.35857754 |
| Kctd14      | 29.3279502 | -0.6496668 | 0.4204879  | -1.5450308 | 0.12233882 | 0.37281814 |
| Cep290      | 1632.2421  | -0.6496862 | 0.25000819 | -2.5986598 | 0.00935885 | 0.07382763 |
| Ccdc141     | 1933.80676 | -0.6497436 | 0.33715488 | -1.927137  | 0.05396256 | 0.2301623  |
| Zfp280c     | 3143.09954 | -0.6500122 | 0.23680612 | -2.7449129 | 0.0060527  | 0.05412621 |
| Gm2a        | 3764.53917 | -0.6504283 | 0.24829884 | -2.619538  | 0.0088049  | 0.07090883 |
| Mut         | 4501.93047 | -0.6507086 | 0.19585008 | -3.3224829 | 0.0008922  | 0.0134444  |
| Gm13826     | 2335.86784 | -0.650945  | 0.21673522 | -3.0034111 | 0.00266972 | 0.03004106 |
| Nedd1       | 2752.4236  | -0.6511611 | 0.19612354 | -3.3201579 | 0.00089967 | 0.01353065 |
| Spatc1      | 17.1947344 | -0.6512078 | 0.43207181 | -1.5071749 | 0.13176583 | 0.38823237 |
| Cntrl       | 4294.89391 | -0.6514569 | 0.20192454 | -3.2262396 | 0.00125428 | 0.01723088 |
| Wnk2        | 169.010528 | -0.6515653 | 0.3008759  | -2.1655617 | 0.03034469 | 0.16048754 |
| Appl1       | 7223.56611 | -0.6517312 | 0.18972143 | -3.4352006 | 0.00059212 | 0.00990106 |
| Tmem163     | 30.6422439 | -0.651904  | 0.41161243 | -1.583781  | 0.11324356 | 0.35655018 |
| Patl2       | 1563.5026  | -0.6526369 | 0.3170496  | -2.0584693 | 0.0395451  | 0.18991988 |
| Vti1a       | 704.44684  | -0.6527625 | 0.26086877 | -2.5022637 | 0.0123402  | 0.08892059 |
| Fxr1        | 36084.9844 | -0.6530003 | 0.15342727 | -4.2560901 | 2.08E-05   | 0.00068832 |
| Pcsk6       | 8605.72801 | -0.6530562 | 0.22032651 | -2.9640382 | 0.00303631 | 0.03302127 |
| Kcnh2       | 538.194323 | -0.6530761 | 0.22544219 | -2.8968673 | 0.00376909 | 0.0383343  |
| 2410076I21R | 2474.69662 | -0.6531166 | 0.2607324  | -2.5049309 | 0.01224753 | 0.08848489 |
| Arhgap28    | 1026.50513 | -0.653451  | 0.24136287 | -2.7073384 | 0.00678251 | 0.05866229 |



|             |            |            |            |            |            |            |
|-------------|------------|------------|------------|------------|------------|------------|
| Def8        | 6672.21832 | -0.6535    | 0.18815223 | -3.4732515 | 0.00051419 | 0.00884538 |
| Cep72       | 1923.23124 | -0.6545482 | 0.23769029 | -2.7537858 | 0.00589103 | 0.05307714 |
| 1700003M02  | 284.152024 | -0.654889  | 0.30158896 | -2.1714621 | 0.02989626 | 0.15907484 |
| Ablim1      | 3572.79669 | -0.6557602 | 0.30080858 | -2.1799918 | 0.02925807 | 0.15689389 |
| D230030E09f | 9.45905565 | -0.6558826 | 0.42740555 | -1.5345672 | 0.12489017 | 0.37770653 |
| Abcg1       | 1261.22611 | -0.6561838 | 0.32394917 | -2.0255763 | 0.04280822 | 0.19943399 |
| Zfp958      | 2285.73129 | -0.6567753 | 0.1899539  | -3.4575512 | 0.00054511 | 0.00924426 |
| Mamstr      | 143.277521 | -0.657125  | 0.4131599  | -1.590486  | 0.1117253  | 0.35356943 |
| Pate2       | 21.7858583 | -0.6579534 | 0.42690148 | -1.5412301 | 0.1232608  | 0.37474658 |
| Kif2c       | 8980.33645 | -0.6580039 | 0.15696741 | -4.1919777 | 2.77E-05   | 0.00086701 |
| Zfp937      | 765.607178 | -0.658822  | 0.21551247 | -3.057002  | 0.00223563 | 0.02649867 |
| Cat         | 13128.3999 | -0.6589178 | 0.22241809 | -2.9625188 | 0.00305133 | 0.03313636 |
| Plxna3      | 696.667206 | -0.6589193 | 0.22713697 | -2.9009778 | 0.00372    | 0.03793426 |
| Zfp945      | 1749.26206 | -0.6589403 | 0.36369492 | -1.8117942 | 0.070018   | 0.26945062 |
| St3gal1     | 97.8298588 | -0.659157  | 0.41546922 | -1.5865363 | 0.11261772 | 0.35523693 |
| 3110045C21f | 16.5159474 | -0.659415  | 0.43227136 | -1.5254653 | 0.12714307 | 0.38089037 |
| Gm960       | 7.3166392  | -0.6602216 | 0.42320096 | -1.5600665 | 0.11874417 | 0.36645974 |
| Zfp472      | 1600.21979 | -0.6603891 | 0.18099884 | -3.6485817 | 0.00026369 | 0.00528575 |
| Rdh11       | 2306.4415  | -0.6613812 | 0.17598142 | -3.7582441 | 0.00017111 | 0.0037803  |
| Gm11413     | 58.2860481 | -0.6615748 | 0.39435673 | -1.677605  | 0.09342424 | 0.31846566 |
| Ccbl2       | 3012.54654 | -0.6615766 | 0.23836918 | -2.7754283 | 0.00551291 | 0.05072852 |
| Cd1d2       | 47.4762342 | -0.6624082 | 0.41731609 | -1.5873057 | 0.11244342 | 0.35490311 |
| Cyp2d22     | 16.3822728 | -0.6625067 | 0.42691374 | -1.5518515 | 0.12069777 | 0.36940975 |
| Krtcap3     | 278.085828 | -0.6630184 | 0.36285654 | -1.8272191 | 0.06766684 | 0.26406198 |
| Ttl         | 1865.39025 | -0.6630378 | 0.20631521 | -3.2137125 | 0.00131031 | 0.01773421 |
| Lrrn1       | 10.7543345 | -0.6630447 | 0.41549557 | -1.5957925 | 0.11053512 | 0.35130424 |
| Zfp37       | 786.753893 | -0.6632651 | 0.22626307 | -2.9313889 | 0.0033745  | 0.03548131 |
| Pcdhgb8     | 26.2066591 | -0.6639204 | 0.43059365 | -1.5418723 | 0.12310464 | 0.37454897 |
| Nkx6-3      | 194.671057 | -0.664195  | 0.37301266 | -1.7806232 | 0.07497403 | 0.28013482 |
| Usp51       | 54.2420737 | -0.6646976 | 0.35802344 | -1.8565758 | 0.06337153 | 0.25451724 |
| Syng4       | 103.198961 | -0.6651135 | 0.35151904 | -1.8921124 | 0.05847601 | 0.24189476 |
| Gstm6       | 390.216009 | -0.6651348 | 0.34912855 | -1.9051286 | 0.05676336 | 0.23754762 |
| Gm15545     | 44.4618057 | -0.6651824 | 0.36767626 | -1.8091524 | 0.07042732 | 0.27015671 |
| Srrm4os     | 1043.48042 | -0.6668094 | 0.33173021 | -2.0100956 | 0.04442107 | 0.20383361 |
| lqcb1       | 3100.62232 | -0.6672124 | 0.21708202 | -3.0735495 | 0.00211529 | 0.02534269 |
| Zmym6       | 2960.90023 | -0.6673297 | 0.20012494 | -3.3345656 | 0.00085433 | 0.01307642 |
| N4bp3       | 2240.40251 | -0.6676839 | 0.19726669 | -3.3846765 | 0.00071262 | 0.01143652 |
| C330027C09f | 10898.5356 | -0.6681506 | 0.17658472 | -3.7837396 | 0.00015449 | 0.00347177 |
| Bmf         | 764.626817 | -0.6682941 | 0.18928733 | -3.5305804 | 0.00041465 | 0.00753295 |
| Phgdh       | 5931.94533 | -0.6688059 | 0.20165568 | -3.3165735 | 0.00091129 | 0.01363947 |
| Rtp2        | 10.9473409 | -0.668987  | 0.38062639 | -1.7575949 | NA         | NA         |

|             |            |            |            |            |            |            |
|-------------|------------|------------|------------|------------|------------|------------|
| Zfp715      | 2035.14345 | -0.6692345 | 0.22562322 | -2.9661599 | 0.00301544 | 0.03293052 |
| Sox8        | 27.4920278 | -0.6692613 | 0.42778902 | -1.5644657 | 0.11770824 | 0.3642587  |
| Palb2       | 2643.45371 | -0.6697585 | 0.15394824 | -4.3505436 | 1.36E-05   | 0.0004866  |
| Arhgap19    | 6761.70678 | -0.6701012 | 0.20237559 | -3.3111762 | 0.00092905 | 0.01385197 |
| Fam126b     | 1255.39415 | -0.6703252 | 0.25869298 | -2.5911997 | 0.0095642  | 0.07489064 |
| Zfp493      | 892.396276 | -0.6710251 | 0.31225547 | -2.1489617 | 0.03163743 | 0.16543165 |
| Nalcn       | 98.9886178 | -0.6710724 | 0.34119504 | -1.9668294 | 0.04920288 | 0.21731157 |
| Meiob       | 45.4500633 | -0.6710933 | 0.40224778 | -1.6683581 | 0.09524467 | 0.32233946 |
| Gria4       | 15.1556208 | -0.6711052 | 0.43135394 | -1.555811  | 0.11975304 | 0.36825776 |
| Lrguk       | 110.912591 | -0.6721039 | 0.29633818 | -2.2680302 | 0.02332737 | 0.1363774  |
| Bst1        | 420.624226 | -0.6721756 | 0.28488397 | -2.3594714 | 0.01830099 | 0.1164956  |
| Igtp        | 163.752372 | -0.6721789 | 0.37937047 | -1.7718271 | 0.07642327 | 0.283601   |
| Lats1       | 1607.9309  | -0.6722518 | 0.25409374 | -2.6456844 | 0.00815258 | 0.06750844 |
| Kcnb1       | 99.5410034 | -0.6724456 | 0.35836369 | -1.8764334 | 0.06059579 | 0.24771956 |
| Msh5        | 58.5165796 | -0.6724801 | 0.34973317 | -1.9228378 | 0.05450043 | 0.23144078 |
| Rilpl1      | 481.148596 | -0.6727602 | 0.25405791 | -2.6480584 | 0.00809555 | 0.06717927 |
| Cyp2j9      | 33.4785708 | -0.672998  | 0.42437232 | -1.5858669 | 0.11276951 | 0.35564361 |
| 4632428N05I | 41.6629802 | -0.673086  | 0.43102576 | -1.5615912 | 0.11838433 | 0.36571209 |
| 3110082I17R | 1678.95136 | -0.6733128 | 0.20775703 | -3.2408664 | 0.00119167 | 0.01666516 |
| Zfp575      | 7.83731676 | -0.673323  | 0.4191635  | -1.6063493 | 0.10819719 | 0.3475348  |
| Wdr31       | 826.20307  | -0.6737031 | 0.21232618 | -3.1729632 | 0.00150892 | 0.01966904 |
| Cask        | 2655.44524 | -0.6737514 | 0.24724365 | -2.7250505 | 0.00642916 | 0.05629501 |
| Mipol1      | 653.815121 | -0.6741739 | 0.2751797  | -2.4499406 | 0.01428798 | 0.0983191  |
| Pank3       | 5856.86021 | -0.6742504 | 0.27420451 | -2.4589325 | 0.01393508 | 0.0965276  |
| Armcx6      | 67.9098303 | -0.67435   | 0.36282902 | -1.8585889 | 0.06308543 | 0.25389275 |
| Elmod2      | 1776.64594 | -0.6749687 | 0.24476002 | -2.7576754 | 0.0058214  | 0.05263288 |
| Cyp39a1     | 354.060691 | -0.6750551 | 0.24731014 | -2.7295891 | 0.00634133 | 0.05577716 |
| Eif4a2      | 77097.6682 | -0.6753784 | 0.25832691 | -2.614433  | 0.00893757 | 0.07153274 |
| Rfx8        | 28.8362086 | -0.6759969 | 0.42566315 | -1.5881028 | 0.11226309 | 0.3545406  |
| Gcat        | 7161.65109 | -0.6760284 | 0.2357304  | -2.8678033 | 0.00413332 | 0.04068185 |
| Slc6a20a    | 6.73662014 | -0.6760383 | 0.42339098 | -1.5967235 | 0.11032735 | 0.35105463 |
| Col26a1     | 286.274724 | -0.6761008 | 0.31797075 | -2.1262987 | 0.03347839 | 0.17123146 |
| Arid3a      | 1273.72509 | -0.6767839 | 0.23529093 | -2.8763707 | 0.00402277 | 0.04000712 |
| Abcc2       | 235.718364 | -0.6778083 | 0.4189583  | -1.6178418 | NA         | NA         |
| Cdkn1c      | 159.848227 | -0.6779735 | 0.36246177 | -1.870469  | 0.06141872 | 0.24957474 |
| Uba6        | 5011.75304 | -0.6795613 | 0.2582091  | -2.6318256 | 0.00849275 | 0.06921944 |
| 4930451C15F | 16.9244773 | -0.6802258 | 0.43208559 | -1.5742848 | 0.11542163 | 0.3603537  |
| Syce2       | 4816.18994 | -0.6803628 | 0.21170241 | -3.2137699 | 0.00131005 | 0.01773421 |
| Tlcd2       | 314.510995 | -0.680553  | 0.31772734 | -2.1419404 | 0.03219828 | 0.16696081 |
| Arhgap5     | 8445.07738 | -0.6805539 | 0.23299447 | -2.9209015 | 0.0034902  | 0.0363051  |
| Cd160       | 17.2735971 | -0.6815555 | 0.42410065 | -1.6070608 | 0.10804104 | 0.34728115 |

|             |            |            |            |            |            |            |
|-------------|------------|------------|------------|------------|------------|------------|
| Efhd1       | 274.770503 | -0.6818723 | 0.27969601 | -2.4379049 | 0.01477266 | 0.10047016 |
| Atad5       | 5528.08577 | -0.6820289 | 0.2461153  | -2.7711763 | 0.00558542 | 0.05125204 |
| Susd5       | 108.841644 | -0.6827329 | 0.3743133  | -1.823961  | 0.06815797 | 0.26505819 |
| Rnf141      | 274.797587 | -0.6830208 | 0.26193987 | -2.6075481 | 0.00911933 | 0.07259864 |
| Smc4        | 23348.4803 | -0.6831758 | 0.19296651 | -3.5403855 | 0.00039954 | 0.00730117 |
| Gm13242     | 7582.23171 | -0.6835173 | 0.29244132 | -2.3372801 | 0.01942462 | 0.12121683 |
| Plin3       | 7679.03889 | -0.6836061 | 0.18404542 | -3.7143339 | 0.00020374 | 0.00434617 |
| Pcca        | 2097.40893 | -0.6838102 | 0.20532839 | -3.3303248 | 0.00086745 | 0.01321222 |
| Arhgap33    | 80.6009355 | -0.6842229 | 0.32060349 | -2.1341719 | 0.03282872 | 0.16915817 |
| Pemt        | 270.139351 | -0.6847642 | 0.34152173 | -2.0050383 | 0.04495895 | 0.20548551 |
| Qdpr        | 8317.28531 | -0.6850587 | 0.18028055 | -3.7999589 | 0.00014472 | 0.00333414 |
| Rab11fip1   | 4518.3742  | -0.685072  | 0.28478477 | -2.4055782 | 0.0161469  | 0.10685123 |
| Hk1         | 10222.7994 | -0.6855182 | 0.158887   | -4.3145016 | 1.60E-05   | 0.0005514  |
| Kif3a       | 2272.88551 | -0.686069  | 0.23693186 | -2.8956384 | 0.00378388 | 0.03835929 |
| Pcif1       | 1427.40447 | -0.6869272 | 0.21627792 | -3.1761319 | 0.00149253 | 0.01955148 |
| Snord96a    | 600.247872 | -0.6870245 | 0.24178329 | -2.8414886 | 0.00449035 | 0.0432916  |
| E430018J23R | 95.2813557 | -0.6896082 | 0.29469938 | -2.3400395 | 0.0192817  | 0.12066388 |
| Otx2        | 848.594542 | -0.6904009 | 0.40924604 | -1.687007  | 0.091602   | 0.31522522 |
| Snord2      | 659.533223 | -0.6909801 | 0.3197613  | -2.1609248 | 0.03070115 | 0.16176637 |
| Nrg4        | 152.909439 | -0.691096  | 0.24559923 | -2.8139178 | 0.00489417 | 0.04612685 |
| Irf6        | 787.688035 | -0.6915006 | 0.21358246 | -3.2376283 | 0.00120528 | 0.01675001 |
| Gstm7       | 119.623935 | -0.6922766 | 0.41380411 | -1.6729573 | 0.09433571 | 0.32012942 |
| Zfp354c     | 1411.77031 | -0.6927043 | 0.22483839 | -3.0808989 | 0.00206377 | 0.0249756  |
| Dmc1        | 551.526797 | -0.6928347 | 0.31150252 | -2.2241704 | 0.02613698 | 0.14621961 |
| Plch2       | 39.5702017 | -0.693223  | 0.3843229  | -1.8037515 | 0.07127028 | 0.27194282 |
| Al593442    | 41.3480709 | -0.6932533 | 0.39425615 | -1.7583829 | NA         | NA         |
| Pmp22       | 36.0449216 | -0.6933721 | 0.42152771 | -1.6449028 | 0.09998986 | 0.33097962 |
| Arhgap33os  | 48.0397332 | -0.6943576 | 0.42235193 | -1.644026  | 0.10017082 | 0.33143754 |
| Phospho1    | 753.997228 | -0.6945515 | 0.1861771  | -3.7305959 | 0.00019103 | 0.00414898 |
| Zfp120      | 1293.80466 | -0.694616  | 0.16728697 | -4.1522423 | 3.29E-05   | 0.00100984 |
| Cdc20       | 10506.465  | -0.6948374 | 0.20544127 | -3.3821707 | 0.00071915 | 0.01150573 |
| Kif17       | 37.7083834 | -0.6950048 | 0.40253982 | -1.7265493 | 0.08424864 | 0.30083827 |
| Pbld1       | 25.2433697 | -0.6951315 | 0.42973904 | -1.6175665 | 0.10575605 | 0.34248486 |
| Ppp4r4      | 137.851438 | -0.6951802 | 0.31755066 | -2.1891946 | 0.0285827  | 0.1549824  |
| Lmcd1       | 6.10517804 | -0.6955285 | 0.40836802 | -1.7031905 | 0.08853242 | 0.30976524 |
| Qpct        | 1846.06128 | -0.6958983 | 0.21960234 | -3.1689018 | 0.00153016 | 0.01985579 |
| Dtd1        | 517.118994 | -0.6967112 | 0.40004757 | -1.7415709 | 0.08158355 | 0.29530769 |
| Krt18       | 472.408948 | -0.6967208 | 0.35965609 | -1.937186  | 0.05272261 | 0.22703322 |
| Zfp41       | 1297.39671 | -0.6969984 | 0.21181307 | -3.2906299 | 0.00099963 | 0.01455552 |
| Pbld2       | 52.9547989 | -0.6970559 | 0.362558   | -1.9226053 | 0.05452964 | 0.23150161 |
| Zfp748      | 2018.43677 | -0.6974013 | 0.20197707 | -3.4528736 | 0.00055465 | 0.00938558 |

|             |            |            |            |            |            |            |
|-------------|------------|------------|------------|------------|------------|------------|
| Zfp358      | 338.472465 | -0.6977478 | 0.34756736 | -2.0075183 | 0.04469451 | 0.20478618 |
| Alg11       | 3219.59891 | -0.6977803 | 0.18074196 | -3.8606433 | 0.00011309 | 0.00269731 |
| Kcnu1       | 175.195269 | -0.6981511 | 0.37989523 | -1.8377464 | 0.06609978 | 0.26043013 |
| Ifit2       | 50.2382833 | -0.6986708 | 0.42580904 | -1.6408077 | 0.10083733 | 0.33279315 |
| 2310039L15F | 56.6634703 | -0.6991158 | 0.42085034 | -1.6611982 | 0.09667365 | 0.32484267 |
| Ffar4       | 24.6660495 | -0.6991681 | 0.43158255 | -1.6200101 | 0.10523011 | 0.34149278 |
| Ddah2       | 4209.35662 | -0.6994132 | 0.2408412  | -2.9040429 | 0.00368378 | 0.03768843 |
| Zfp26       | 3947.64772 | -0.6995025 | 0.21937322 | -3.1886412 | 0.00142943 | 0.018983   |
| Mcm10       | 10520.2811 | -0.6998642 | 0.17361102 | -4.0312201 | 5.55E-05   | 0.00150856 |
| Nxt2        | 2718.59298 | -0.7001115 | 0.34759233 | -2.0141742 | 0.04399125 | 0.20257858 |
| Pif1        | 2970.04142 | -0.700519  | 0.18799418 | -3.7262804 | 0.00019433 | 0.00419136 |
| Tspan7      | 103.436547 | -0.7017259 | 0.3965482  | -1.7695854 | 0.07679623 | 0.28448265 |
| Rif1        | 38374.1858 | -0.7018626 | 0.25312938 | -2.7727426 | 0.00555861 | 0.0510886  |
| Slc17a9     | 1989.61856 | -0.7020094 | 0.19781135 | -3.5488831 | 0.00038687 | 0.00710295 |
| Chst15      | 102.695654 | -0.7020474 | 0.39556664 | -1.7747892 | 0.0759327  | 0.28229248 |
| 9030617O03I | 2815.01131 | -0.7021585 | 0.24594661 | -2.8549225 | 0.00430473 | 0.04197047 |
| Ptprz1      | 42.0360577 | -0.7030248 | 0.41731841 | -1.6846245 | 0.09206104 | 0.31596586 |
| Il1rl2      | 23.2960758 | -0.7030724 | 0.42953083 | -1.636838  | 0.10166432 | 0.33488282 |
| Mysm1       | 2855.74179 | -0.7031677 | 0.21716647 | -3.2379201 | 0.00120405 | 0.01675001 |
| Fyco1       | 1293.78608 | -0.7032379 | 0.22392642 | -3.1404866 | 0.00168667 | 0.02133939 |
| Raet1a      | 19.5605648 | -0.7039166 | 0.41743028 | -1.6863095 | 0.0917362  | 0.3153569  |
| Myof        | 11596.4971 | -0.7044329 | 0.30095668 | -2.3406454 | 0.01925044 | 0.12063633 |
| Zfp939      | 222.523798 | -0.7048487 | 0.23677503 | -2.9768709 | 0.00291207 | 0.03213457 |
| Zfp516      | 6063.99706 | -0.7048853 | 0.21185626 | -3.3271865 | 0.00087728 | 0.01329955 |
| Mtmr7       | 4522.16891 | -0.7054462 | 0.24522055 | -2.8767827 | 0.00401752 | 0.03999775 |
| Cgref1      | 611.296563 | -0.7056709 | 0.19300967 | -3.6561428 | 0.00025604 | 0.00516428 |
| Chst12      | 501.141018 | -0.7060652 | 0.27423158 | -2.5747041 | 0.01003259 | 0.07765892 |
| Mip         | 95.9602585 | -0.7063424 | 0.35324762 | -1.9995675 | 0.04554699 | 0.20722681 |
| Fgyy        | 210.752378 | -0.7064668 | 0.37296147 | -1.8942084 | 0.05819735 | 0.24108336 |
| LOC666331   | 13.9450091 | -0.7068192 | 0.42416334 | -1.6663844 | 0.09563687 | 0.32310427 |
| Zfp51       | 1414.61567 | -0.707104  | 0.1639246  | -4.3135932 | 1.61E-05   | 0.0005514  |
| Prkaa1      | 3639.98086 | -0.7072119 | 0.20264346 | -3.489932  | 0.00048314 | 0.00841362 |
| Fbxl16      | 267.10136  | -0.707535  | 0.28420373 | -2.4895345 | 0.01279105 | 0.09086963 |
| Svip        | 735.735238 | -0.7079274 | 0.20726183 | -3.415619  | 0.00063637 | 0.01052458 |
| Mas1        | 20.5648734 | -0.707934  | 0.42310092 | -1.6732036 | 0.09428723 | 0.32007437 |
| Trim43a     | 212.78667  | -0.7080024 | 0.42784361 | -1.654816  | 0.09796184 | 0.32719169 |
| Gpr133      | 197.379076 | -0.7081164 | 0.4100081  | -1.727079  | 0.08415348 | 0.30061573 |
| Zfp944      | 2291.75538 | -0.7081344 | 0.19957226 | -3.5482607 | 0.00038778 | 0.00710965 |
| Clcn1       | 76.0050064 | -0.7082684 | 0.39003134 | -1.8159268 | 0.06938161 | 0.26819621 |
| Pirt        | 108.48693  | -0.7083684 | 0.36606112 | -1.9351097 | 0.05297684 | 0.22802182 |
| Ncald       | 12.2716537 | -0.7085747 | 0.42920999 | -1.6508812 | 0.09876284 | 0.32874299 |

|           |            |            |            |            |            |            |
|-----------|------------|------------|------------|------------|------------|------------|
| Ogfod3    | 528.799237 | -0.7088184 | 0.21875675 | -3.2402128 | 0.00119441 | 0.0166884  |
| Ncapg     | 11300.0801 | -0.7089817 | 0.16489266 | -4.2996557 | 1.71E-05   | 0.0005821  |
| Kcna5     | 9.89492478 | -0.7090433 | 0.40804522 | -1.7376587 | 0.08227097 | 0.29684358 |
| Lypla1    | 16772.9794 | -0.7093326 | 0.22027725 | -3.2201811 | 0.0012811  | 0.01752184 |
| Myrfl     | 18.4396498 | -0.709784  | 0.42722645 | -1.6613764 | 0.09663787 | 0.32479263 |
| Fam213b   | 588.237309 | -0.7104295 | 0.30720449 | -2.3125623 | 0.02074672 | 0.12684142 |
| Gm4262    | 87.9939937 | -0.7109415 | 0.31799098 | -2.2357286 | 0.02536955 | 0.14367149 |
| Klhl3     | 61.0796952 | -0.7119436 | 0.41890543 | -1.6995331 | 0.08921878 | 0.31101075 |
| Cwf19l2   | 4579.07681 | -0.7119751 | 0.19028545 | -3.741616  | 0.00018284 | 0.00399909 |
| Hsd1l     | 1561.27398 | -0.7120981 | 0.20563669 | -3.4628944 | 0.0005344  | 0.00913234 |
| Eno1b     | 1792.27474 | -0.7125715 | 0.34574781 | -2.0609573 | 0.03930712 | 0.18953953 |
| Rftn2     | 160.27404  | -0.7132646 | 0.34277875 | -2.0808307 | 0.0374494  | 0.18371473 |
| Otop1     | 54.9947941 | -0.7135298 | 0.42789098 | -1.6675505 | 0.09540499 | 0.32274239 |
| Map4k4    | 15077.6921 | -0.7148248 | 0.21758696 | -3.2852372 | 0.00101897 | 0.01479545 |
| Fas       | 27.1190703 | -0.7155575 | 0.42705706 | -1.6755547 | 0.09382545 | 0.3190125  |
| Mastl     | 3940.36001 | -0.715657  | 0.18401296 | -3.889166  | 0.00010059 | 0.00244799 |
| Fancd2    | 6375.66216 | -0.7163078 | 0.16754355 | -4.2753528 | 1.91E-05   | 0.00063821 |
| Thada     | 4674.25962 | -0.7166141 | 0.26177239 | -2.7375466 | 0.00618993 | 0.05478638 |
| Cep70     | 2465.98065 | -0.7170901 | 0.1724968  | -4.1571215 | 3.22E-05   | 0.00099048 |
| Kcnj11    | 5.41867322 | -0.7180035 | 0.3881594  | -1.8497645 | 0.0643475  | NA         |
| Cenpc1    | 4113.85979 | -0.7186036 | 0.15572606 | -4.6145365 | 3.94E-06   | 0.00017455 |
| Zfp600    | 4838.16956 | -0.719163  | 0.29484707 | -2.4391053 | 0.01472368 | 0.10033652 |
| Gprasp2   | 1370.54594 | -0.7204182 | 0.2229072  | -3.2319198 | 0.00122962 | 0.01697938 |
| Tmprss6   | 10.0827888 | -0.7206074 | 0.41989526 | -1.7161598 | 0.0861328  | 0.30489812 |
| Rnf144a   | 398.199456 | -0.7206459 | 0.28954377 | -2.4889015 | 0.01281384 | 0.09090698 |
| Tmem68    | 1240.43949 | -0.7209505 | 0.2675716  | -2.6944208 | 0.00705111 | 0.06030338 |
| Htr3a     | 27.9858036 | -0.7213838 | 0.43054134 | -1.6755273 | 0.09383083 | 0.3190125  |
| Shcbp1    | 4430.76916 | -0.7216108 | 0.18613406 | -3.8768336 | 0.00010582 | 0.0025554  |
| Kcnk5     | 3866.64464 | -0.7218416 | 0.17960765 | -4.0189913 | 5.84E-05   | 0.00156678 |
| Pla2g5    | 461.770005 | -0.7224869 | 0.33721671 | -2.1425003 | 0.03215324 | 0.16689423 |
| Notch4    | 1017.89906 | -0.7228414 | 0.26481507 | -2.7296084 | 0.00634096 | 0.05577716 |
| Ly6g6c    | 26.7531321 | -0.7233061 | 0.42172816 | -1.7151003 | NA         | NA         |
| Nudcd3    | 5984.04579 | -0.7235646 | 0.24723015 | -2.9266841 | 0.00342597 | 0.03587691 |
| Snord53   | 42.4427239 | -0.7241231 | 0.38965765 | -1.8583571 | 0.06311831 | 0.25390138 |
| Glb1l2    | 245.653733 | -0.7243459 | 0.28220864 | -2.5667036 | 0.01026703 | 0.07876795 |
| Lysmd3    | 1445.62624 | -0.7247835 | 0.25418772 | -2.8513709 | 0.00435312 | 0.04227463 |
| Kcnrg     | 68.0474115 | -0.7249874 | 0.37187218 | -1.9495607 | 0.0512285  | 0.22277806 |
| Hist1h2ae | 9.42240944 | -0.7252095 | 0.42785418 | -1.6949923 | 0.09007688 | 0.31253583 |
| Spice1    | 3100.47795 | -0.7254432 | 0.14923154 | -4.8611923 | 1.17E-06   | 6.32E-05   |
| Hist1h2ah | 7.09149336 | -0.7256854 | 0.41160931 | -1.7630441 | 0.07789306 | 0.28697345 |
| Stambpl1  | 332.661746 | -0.7258006 | 0.3753728  | -1.933546  | 0.05316897 | 0.22878548 |

|             |            |            |            |            |            |            |
|-------------|------------|------------|------------|------------|------------|------------|
| Kif23       | 8153.98002 | -0.7266263 | 0.17536212 | -4.1435758 | 3.42E-05   | 0.00103653 |
| Klhl36      | 131.601414 | -0.7276941 | 0.29023337 | -2.5072723 | 0.01216669 | 0.08820712 |
| Zfp775      | 772.293521 | -0.7279519 | 0.19976179 | -3.6440996 | 0.00026833 | 0.00534973 |
| Stmn2       | 14730.0526 | -0.7279943 | 0.22353544 | -3.2567286 | 0.00112704 | 0.01599144 |
| Ctsh        | 47.5512058 | -0.7286488 | 0.39114316 | -1.8628699 | 0.06248057 | 0.25214118 |
| Rsad2       | 25.0283001 | -0.72947   | 0.42909611 | -1.7000153 | 0.08912804 | 0.31083879 |
| LOC10050367 | 952.612693 | -0.7296516 | 0.19058077 | -3.8285688 | 0.00012889 | 0.00300958 |
| Arl5b       | 2229.29729 | -0.7307089 | 0.28025835 | -2.6072689 | 0.00912677 | 0.07259864 |
| BC068157    | 141.989349 | -0.7307251 | 0.35885833 | -2.0362496 | 0.04172529 | 0.19591487 |
| Zfp773      | 313.044682 | -0.7310542 | 0.21829484 | -3.3489305 | 0.00081124 | 0.01261561 |
| Cep85l      | 231.73093  | -0.7311459 | 0.35211616 | -2.0764338 | 0.03785384 | 0.1850873  |
| Odf2l       | 720.037327 | -0.7314364 | 0.32144335 | -2.2754752 | 0.02287744 | 0.13501598 |
| Mocos       | 376.801127 | -0.7321796 | 0.36519849 | -2.0048811 | 0.04497576 | 0.20548551 |
| Gsx2        | 24.5062331 | -0.7328212 | 0.41740501 | -1.7556598 | 0.07914651 | 0.29028477 |
| Cyp4f37     | 15.0568834 | -0.7331623 | 0.4317119  | -1.6982675 | 0.08945728 | 0.31119611 |
| Ckap2l      | 5285.84815 | -0.7334959 | 0.16073157 | -4.5634836 | 5.03E-06   | 0.00021146 |
| Cntfr       | 80.2813655 | -0.7335575 | 0.43227215 | -1.6969808 | 0.08970029 | 0.3116464  |
| Mov10l1     | 289.444485 | -0.7335632 | 0.35604576 | -2.0603059 | 0.03936931 | 0.18954651 |
| Tcea3       | 2265.66883 | -0.7338579 | 0.29616731 | -2.4778491 | 0.0132177  | 0.09292427 |
| Cenpi       | 3062.5437  | -0.7343142 | 0.16404038 | -4.4764235 | 7.59E-06   | 0.00029968 |
| Npw         | 28.9784708 | -0.7344086 | 0.41103318 | -1.7867379 | 0.07397986 | 0.27775489 |
| Pdk4        | 376.357161 | -0.7347667 | 0.30270112 | -2.4273668 | 0.01520887 | 0.10256424 |
| Cd83        | 7.49464154 | -0.7349637 | 0.42203545 | -1.7414739 | 0.08160054 | 0.29530769 |
| Foxr1       | 218.441717 | -0.735632  | 0.3947208  | -1.8636768 | 0.06236711 | 0.2518491  |
| Catsperg2   | 30.0516914 | -0.7364851 | 0.42663426 | -1.726268  | 0.08429921 | 0.30094974 |
| Map4k3      | 5261.45667 | -0.736802  | 0.21519499 | -3.423881  | 0.00061734 | 0.01025662 |
| Serpinb9    | 138.503863 | -0.7368541 | 0.32126835 | -2.2935781 | 0.02181475 | 0.13072875 |
| Htr5a       | 347.278945 | -0.7369125 | 0.41011956 | -1.7968235 | 0.07236364 | 0.27431941 |
| Btnl1       | 39.0284226 | -0.7369636 | 0.40266808 | -1.8302012 | 0.06721986 | 0.2633085  |
| Ms4a15      | 11.4531654 | -0.7372753 | 0.43137606 | -1.7091243 | 0.08742792 | 0.30773917 |
| Zfp455      | 128.381427 | -0.7377876 | 0.33859745 | -2.178952  | 0.02933523 | 0.15701257 |
| Rnf224      | 36.9796906 | -0.7379989 | 0.41559391 | -1.7757692 | 0.07577096 | 0.28186405 |
| Galnt9      | 15.1853465 | -0.7386353 | 0.43119595 | -1.7129922 | 0.08671398 | 0.30622332 |
| Stmn1       | 3508.78972 | -0.7390328 | 0.27069236 | -2.7301577 | 0.0063304  | 0.05577716 |
| Apoc4       | 30.1945238 | -0.7399323 | 0.43157549 | -1.7144911 | 0.08643857 | 0.30564466 |
| Atr         | 7504.83763 | -0.7405073 | 0.19248514 | -3.8470881 | 0.00011953 | 0.00282065 |
| Pold1       | 8148.94785 | -0.7405175 | 0.15770699 | -4.6955275 | 2.66E-06   | 0.00012724 |
| Psat1       | 32027.8003 | -0.7411573 | 0.16104044 | -4.6023054 | 4.18E-06   | 0.00018378 |
| Cnn1        | 8.34356074 | -0.7414555 | 0.41623504 | -1.7813386 | 0.07485715 | 0.27989987 |
| Tefm        | 2128.81949 | -0.7419812 | 0.21661441 | -3.425355  | 0.000614   | 0.01023394 |
| 9030025P20F | 31.9662965 | -0.7420572 | 0.43065258 | -1.7230994 | 0.08487055 | 0.30208788 |

|             |            |            |            |            |            |            |
|-------------|------------|------------|------------|------------|------------|------------|
| Pbk         | 3839.60824 | -0.7424545 | 0.17429654 | -4.2597204 | 2.05E-05   | 0.00068013 |
| Ddx60       | 75.2472197 | -0.7434138 | 0.42971603 | -1.7300117 | 0.08362818 | 0.29951679 |
| 2010204K13F | 328.771803 | -0.7440656 | 0.32587143 | -2.2833102 | 0.0224121  | 0.13302694 |
| Lipt1       | 430.227242 | -0.7447172 | 0.22404398 | -3.3239778 | 0.00088743 | 0.01341153 |
| Cdh13       | 10.3669609 | -0.7457321 | 0.43115099 | -1.729631  | 0.08369622 | 0.29962244 |
| Nfatc2      | 131.346362 | -0.7465442 | 0.35792085 | -2.0857801 | 0.03699854 | 0.1824805  |
| Ctsc        | 3572.65551 | -0.7467098 | 0.26334909 | -2.8354372 | 0.0045763  | 0.04398397 |
| Hddc3       | 184.365776 | -0.7468317 | 0.4034356  | -1.8511794 | 0.06414375 | 0.2564266  |
| Asgr2       | 112.655498 | -0.7470855 | 0.3601798  | -2.0742016 | 0.03806059 | 0.18588017 |
| Sbf2        | 3740.03692 | -0.7478433 | 0.22160757 | -3.3746288 | 0.00073915 | 0.01176517 |
| Capn6       | 156.499557 | -0.7479513 | 0.36509939 | -2.0486239 | 0.04049891 | 0.19271892 |
| Tekt5       | 78.4663826 | -0.7479902 | 0.41323614 | -1.8100794 | 0.07028347 | 0.26987118 |
| Podxl       | 1662.6663  | -0.7486009 | 0.21032369 | -3.5592802 | 0.00037187 | 0.00692574 |
| Immp2l      | 368.473417 | -0.7487041 | 0.33914622 | -2.2076146 | 0.02727115 | 0.15017482 |
| Lrrc48      | 251.389585 | -0.7490382 | 0.3360303  | -2.2290794 | 0.02580862 | 0.14531131 |
| Ano8        | 522.076817 | -0.7491857 | 0.21641246 | -3.4618419 | 0.00053649 | 0.00915481 |
| Sh3gl2      | 4297.00407 | -0.7493016 | 0.22077172 | -3.3940107 | 0.00068877 | 0.01111671 |
| Sorcs2      | 435.363273 | -0.7501725 | 0.34078518 | -2.2013062 | 0.02771435 | 0.15193025 |
| Fmo5        | 51.847641  | -0.7505061 | 0.41445074 | -1.8108451 | 0.07016483 | 0.26968196 |
| Kbtbd12     | 18.4072001 | -0.7513106 | 0.39127072 | -1.920181  | 0.05483504 | 0.23230863 |
| Srxn1       | 3035.8394  | -0.751707  | 0.27654315 | -2.7182268 | 0.00656328 | 0.05730804 |
| Map3k13     | 142.676156 | -0.7527251 | 0.3162612  | -2.3800742 | 0.01730915 | 0.11196948 |
| Kif5b       | 17694.1609 | -0.7538576 | 0.2489751  | -3.0278435 | 0.00246306 | 0.02829249 |
| Snx29       | 383.99617  | -0.7540352 | 0.25529385 | -2.9535971 | 0.00314094 | 0.03387291 |
| Ces1c       | 13.5414247 | -0.7545168 | 0.39436903 | -1.9132253 | 0.05571922 | 0.23498367 |
| Cmklr1      | 1041.54861 | -0.7554992 | 0.32030803 | -2.3586644 | 0.01834083 | 0.1166537  |
| Rnase1      | 9.22959237 | -0.7556349 | 0.41841832 | -1.8059316 | 0.07092902 | 0.27107821 |
| Ifitm1      | 8221.74088 | -0.7561495 | 0.4305079  | -1.7564127 | 0.07901797 | 0.29008698 |
| Msantd3     | 2385.12815 | -0.7561945 | 0.18426489 | -4.1038444 | 4.06E-05   | 0.00118778 |
| Oprd1       | 12.6504904 | -0.7581151 | 0.43134709 | -1.7575525 | 0.07882369 | 0.28944208 |
| Gprin2      | 29.1733284 | -0.7584734 | 0.41249901 | -1.8387278 | 0.06595524 | 0.26019024 |
| Spata13     | 712.866656 | -0.758629  | 0.34531559 | -2.1969151 | 0.02802651 | 0.15298008 |
| Arhgap18    | 142.504938 | -0.7587106 | 0.29541744 | -2.568266  | 0.01022087 | 0.07875048 |
| Auts2       | 1852.62661 | -0.7593532 | 0.234994   | -3.2313726 | 0.00123197 | 0.01697938 |
| Bub1b       | 17583.0454 | -0.7595234 | 0.18669824 | -4.0681871 | 4.74E-05   | 0.001347   |
| Nsun6       | 944.701572 | -0.7595713 | 0.2080203  | -3.6514289 | 0.00026079 | 0.00523963 |
| Nuak2       | 646.327651 | -0.7597649 | 0.27642611 | -2.748528  | 0.00598635 | 0.05359457 |
| Lipc        | 157.70242  | -0.7601999 | 0.36501622 | -2.082647  | 0.03728341 | 0.18313151 |
| Rac2        | 499.030336 | -0.7613842 | 0.20530522 | -3.7085476 | 0.00020845 | 0.00444041 |
| Gbp4        | 60.6013997 | -0.7615758 | 0.43058946 | -1.768682  | 0.07694696 | 0.28483746 |
| Fam131c     | 204.830181 | -0.7615793 | 0.30231667 | -2.5191443 | 0.01176404 | 0.08613118 |

|             |            |            |            |            |            |            |
|-------------|------------|------------|------------|------------|------------|------------|
| Tmem8b      | 403.394397 | -0.7616808 | 0.22685068 | -3.3576305 | 0.00078614 | 0.01232379 |
| Zfp710      | 7200.66534 | -0.7617094 | 0.2306358  | -3.3026505 | 0.00095776 | 0.01407758 |
| Krt13       | 30.4184684 | -0.761777  | 0.42590457 | -1.7886096 | 0.07367771 | 0.27716036 |
| Ybx2        | 500.468511 | -0.7617861 | 0.37378238 | -2.038047  | 0.04154524 | 0.19548259 |
| Wasf3       | 1424.04133 | -0.7623056 | 0.20666175 | -3.6886634 | 0.00022544 | 0.0046681  |
| Ppfbp2      | 877.146951 | -0.7623193 | 0.21875146 | -3.4848648 | 0.00049239 | 0.00853633 |
| Mrps31      | 4414.20876 | -0.7628455 | 0.18661335 | -4.0878397 | 4.35E-05   | 0.00125856 |
| Sgk3        | 2336.70692 | -0.7628983 | 0.38727997 | -1.9698883 | 0.04885118 | 0.21621299 |
| Rdm1        | 2892.74411 | -0.7635159 | 0.23068967 | -3.30971   | 0.00093393 | 0.0138848  |
| Hsf2bp      | 5986.01606 | -0.7635867 | 0.18977056 | -4.0237362 | 5.73E-05   | 0.00154652 |
| Gcdh        | 4653.17902 | -0.7637353 | 0.19889858 | -3.8398226 | 0.00012312 | 0.00289228 |
| Hist1h2bk   | 12.7885261 | -0.7653843 | 0.42787171 | -1.7888172 | 0.07364426 | 0.27716036 |
| Atp2b2      | 174.128528 | -0.7656593 | 0.40874326 | -1.8732034 | 0.06104031 | 0.24881724 |
| 5730522E02F | 8.40048533 | -0.7659195 | 0.42440358 | -1.8046961 | 0.07112225 | 0.2714831  |
| Fam69b      | 392.603036 | -0.7661063 | 0.2381314  | -3.2171578 | 0.00129467 | 0.01764546 |
| Gm17296     | 1686.73703 | -0.766353  | 0.27819547 | -2.7547285 | 0.00587409 | 0.05295531 |
| Mdm4        | 9300.15938 | -0.7665145 | 0.24254819 | -3.1602565 | 0.0015763  | 0.02027551 |
| Fbxo17      | 464.561124 | -0.7675932 | 0.2495933  | -3.0753759 | 0.00210237 | 0.02522687 |
| Kif20a      | 19805.7433 | -0.7680868 | 0.1905545  | -4.0307985 | 5.56E-05   | 0.00150863 |
| Gm1976      | 21.6604321 | -0.7684997 | 0.41506945 | -1.8514966 | 0.06409814 | 0.25637607 |
| Sall3       | 1032.72178 | -0.7685328 | 0.34713972 | -2.2139006 | 0.02683562 | 0.14851272 |
| Raet1e      | 41.9569789 | -0.7687385 | 0.43170951 | -1.7806846 | 0.07496398 | 0.28013482 |
| Tmc5        | 101.161316 | -0.7687991 | 0.4141509  | -1.856326  | 0.0634071  | 0.25452862 |
| Grin1       | 2578.25431 | -0.7690619 | 0.40573595 | -1.8954739 | NA         | NA         |
| Spag5       | 7024.19809 | -0.7693356 | 0.16010583 | -4.8051689 | 1.55E-06   | 8.08E-05   |
| Primpol     | 2368.95445 | -0.7700446 | 0.24018361 | -3.2060664 | 0.00134563 | 0.01810197 |
| Trem12      | 93.1145612 | -0.7717596 | 0.38037078 | -2.0289667 | 0.04246168 | 0.19829479 |
| Epor        | 31.9654473 | -0.7727846 | 0.39994629 | -1.9322211 | 0.05333223 | 0.22885717 |
| Fzd8        | 308.343808 | -0.7737159 | 0.21509049 | -3.5971645 | 0.00032171 | 0.0061993  |
| Myadml2     | 10.2301325 | -0.7747063 | 0.43206969 | -1.7930123 | 0.07297095 | 0.27542993 |
| Tbc1d24     | 2248.90904 | -0.7747776 | 0.24593344 | -3.1503549 | 0.00163072 | 0.0208376  |
| 4921525O09I | 136.27905  | -0.7749959 | 0.30694671 | -2.5248548 | 0.01157461 | 0.08512127 |
| Dnah8       | 6053.77147 | -0.7759091 | 0.24995274 | -3.1042232 | 0.00190779 | 0.02365877 |
| Bsn         | 108.518676 | -0.7761969 | 0.28167968 | -2.7556013 | 0.00585844 | 0.05284486 |
| Lgals12     | 68.3442588 | -0.7763573 | 0.40393543 | -1.9219838 | 0.0546078  | 0.23177017 |
| Kif26a      | 193.695249 | -0.7781745 | 0.3810531  | -2.0421681 | 0.04113486 | 0.1944341  |
| Utp14a      | 7411.62938 | -0.7786999 | 0.25806792 | -3.0174222 | 0.00254934 | 0.02893785 |
| Acyp1       | 1090.71148 | -0.7790772 | 0.27641944 | -2.8184604 | 0.00482546 | 0.04570078 |
| 5930412G12I | 216.582637 | -0.7794218 | 0.29306576 | -2.6595458 | 0.00782461 | 0.06541963 |
| Rras        | 1331.90511 | -0.7798435 | 0.25304735 | -3.0818088 | 0.00205747 | 0.02494937 |
| Lrrn2       | 345.100104 | -0.7800826 | 0.3566664  | -2.1871491 | 0.02873164 | 0.15542836 |



|             |            |            |            |            |            |            |
|-------------|------------|------------|------------|------------|------------|------------|
| Zfp459      | 2852.35919 | -0.780129  | 0.25834424 | -3.0197267 | 0.00253003 | 0.02880269 |
| Commd10     | 4784.24823 | -0.7815072 | 0.1622772  | -4.815878  | 1.47E-06   | 7.75E-05   |
| Prkaa2      | 2322.66283 | -0.7821734 | 0.27180236 | -2.8777285 | 0.0040055  | 0.03991826 |
| 8430419L09F | 1045.39761 | -0.7826102 | 0.21404633 | -3.6562654 | 0.00025592 | 0.00516428 |
| Olfr287     | 19.3566984 | -0.7826901 | 0.42493767 | -1.8418939 | 0.06549067 | 0.25931693 |
| Amot        | 108.585993 | -0.7837686 | 0.36347554 | -2.1563172 | 0.03105891 | 0.16312595 |
| Hsd17b2     | 43.9203147 | -0.783895  | 0.43183466 | -1.8152666 | 0.06948295 | 0.26821738 |
| Rxra        | 1281.73349 | -0.7847233 | 0.20643843 | -3.8012464 | 0.00014397 | 0.00332178 |
| Dpp6        | 690.57417  | -0.7857998 | 0.33158665 | -2.3698174 | 0.01779687 | 0.11431606 |
| Myo3b       | 6.6877488  | -0.7861862 | 0.40714637 | -1.9309671 | 0.05348712 | 0.22915812 |
| Myh3        | 171.749726 | -0.7865092 | 0.26749472 | -2.9402795 | 0.00327916 | 0.03481526 |
| Cgn         | 716.846683 | -0.7865182 | 0.21431046 | -3.6699946 | 0.00024256 | 0.00495661 |
| Cfc1        | 22.0015578 | -0.7870899 | 0.43114244 | -1.8255913 | 0.06791185 | 0.264686   |
| Vcan        | 2401.23347 | -0.7871967 | 0.30808668 | -2.5551145 | 0.01061529 | 0.08044752 |
| Zfp738      | 1079.94532 | -0.787345  | 0.27465956 | -2.8666215 | 0.00414879 | 0.04075667 |
| B3gnt2      | 3964.86137 | -0.788005  | 0.22888993 | -3.4427246 | 0.00057589 | 0.00967127 |
| Smpd5       | 12.3453623 | -0.788564  | 0.43218667 | -1.8245912 | 0.06806274 | 0.2648758  |
| Gem         | 105.752513 | -0.7887739 | 0.42127553 | -1.8723468 | 0.06115864 | 0.24903848 |
| Arrdc2      | 1008.55729 | -0.7889588 | 0.23449705 | -3.3644719 | 0.0007669  | 0.01207096 |
| Ngfr        | 1636.86885 | -0.7904446 | 0.27413904 | -2.8833712 | 0.00393443 | 0.03948593 |
| Zfp2        | 1153.67437 | -0.790631  | 0.21284284 | -3.7146236 | 0.00020351 | 0.00434617 |
| Lix1        | 60.8558367 | -0.7909184 | 0.42858072 | -1.8454363 | NA         | NA         |
| Erich3      | 9.25621586 | -0.7914174 | 0.42983412 | -1.8412158 | 0.06558994 | 0.25939598 |
| Iffo2       | 756.230751 | -0.7917642 | 0.1954979  | -4.0499884 | 5.12E-05   | 0.0014173  |
| Tjp3        | 1150.85225 | -0.791897  | 0.32383511 | -2.4453711 | 0.01447032 | 0.09926242 |
| Thra        | 664.484686 | -0.7929381 | 0.22197905 | -3.5721302 | 0.00035409 | 0.00662628 |
| Tspan15     | 1206.8972  | -0.7931729 | 0.33068528 | -2.3985732 | 0.01645908 | 0.10827209 |
| Slc22a7     | 161.66927  | -0.7936335 | 0.29417372 | -2.6978394 | 0.00697911 | 0.05983028 |
| Kif21b      | 1616.59987 | -0.7944094 | 0.19010076 | -4.1788859 | 2.93E-05   | 0.0009111  |
| Lmf1        | 593.911758 | -0.7944998 | 0.27823774 | -2.8554709 | 0.00429731 | 0.04192434 |
| Mnd1        | 1030.88908 | -0.7950833 | 0.24055063 | -3.305264  | 0.00094887 | 0.01398661 |
| Elmo1       | 1056.59049 | -0.7950971 | 0.28369123 | -2.8026847 | 0.00506792 | 0.04743073 |
| Bdp1        | 4625.57039 | -0.7951233 | 0.23822474 | -3.3377027 | 0.00084474 | 0.01296798 |
| Ccbl1       | 936.085336 | -0.7953649 | 0.24566268 | -3.2376302 | 0.00120527 | 0.01675001 |
| Mcph1       | 3200.37645 | -0.7954734 | 0.21168757 | -3.7577708 | 0.00017143 | 0.0037803  |
| Trp73       | 378.418934 | -0.795593  | 0.33254872 | -2.3924104 | 0.01673811 | 0.10950542 |
| Pnma5       | 3975.41644 | -0.7958934 | 0.26050041 | -3.055248  | 0.00224874 | 0.02657954 |
| Lrch2       | 1203.48052 | -0.7961612 | 0.21324584 | -3.7335368 | 0.00018881 | 0.00410654 |
| Trim43b     | 15.5132658 | -0.7964624 | 0.4309441  | -1.8481804 | 0.06457625 | 0.25732607 |
| Tox3        | 98.3900632 | -0.7967493 | 0.28755126 | -2.7708079 | 0.00559174 | 0.05125204 |
| Ticam2      | 119.965031 | -0.7974602 | 0.41091992 | -1.9406707 | 0.05229824 | 0.22603944 |

|             |            |            |            |            |            |            |
|-------------|------------|------------|------------|------------|------------|------------|
| Mbps2       | 3870.70698 | -0.7992784 | 0.15936242 | -5.0154757 | 5.29E-07   | 3.24E-05   |
| Ms4a10      | 124.644457 | -0.7993113 | 0.32021426 | -2.4961764 | 0.01255401 | 0.08989    |
| Klf7        | 133.221341 | -0.7994852 | 0.34138216 | -2.3419068 | 0.0191855  | 0.12035247 |
| Nrep        | 477.208709 | -0.7996173 | 0.24766935 | -3.2285679 | 0.00124412 | 0.01710634 |
| Aloxe3      | 67.3501548 | -0.7996322 | 0.4052325  | -1.9732677 | 0.04846507 | 0.21552197 |
| Xxylt1      | 1942.40704 | -0.8002019 | 0.19324064 | -4.1409608 | 3.46E-05   | 0.00104239 |
| Commd1      | 5233.41605 | -0.801791  | 0.26333475 | -3.0447595 | 0.00232866 | 0.02730362 |
| Kcnmb2      | 14.921028  | -0.8019001 | 0.43191226 | -1.8566272 | 0.06336421 | 0.25451724 |
| Prdm1       | 1337.66547 | -0.8020593 | 0.17108292 | -4.688132  | 2.76E-06   | 0.00013072 |
| Foxj2       | 586.64699  | -0.8027533 | 0.1902177  | -4.2201821 | 2.44E-05   | 0.0007827  |
| Otog        | 25.8589397 | -0.804184  | 0.39863772 | -2.0173305 | 0.04366103 | 0.2017424  |
| Fam3b       | 139.572734 | -0.8052202 | 0.3633718  | -2.2159678 | 0.02669371 | 0.14799696 |
| 1700049G17l | 379.377878 | -0.8054759 | 0.20726599 | -3.8861944 | 0.00010183 | 0.0024704  |
| Phyhip      | 223.257214 | -0.8058201 | 0.28582426 | -2.8192853 | 0.00481307 | 0.04566662 |
| Rassf2      | 853.484533 | -0.8066772 | 0.27667033 | -2.9156621 | 0.00354935 | 0.03682181 |
| Rgma        | 906.002425 | -0.8068116 | 0.30721768 | -2.6261888 | 0.00863469 | 0.07004594 |
| Prdm5       | 2273.33184 | -0.8075823 | 0.22562754 | -3.5792717 | 0.00034455 | 0.0065423  |
| Alms1       | 2888.92763 | -0.8076408 | 0.24589402 | -3.2845078 | 0.00102161 | 0.01480619 |
| Nxpe4       | 25.6490977 | -0.8077669 | 0.4206423  | -1.9203177 | NA         | NA         |
| Pde4c       | 122.928337 | -0.8081978 | 0.33535459 | -2.40998   | 0.0159534  | 0.10575075 |
| Xpa         | 437.307807 | -0.8082754 | 0.27656255 | -2.9225772 | 0.00347148 | 0.03616167 |
| Neurog3     | 7.55013691 | -0.8084598 | 0.38137076 | -2.1198788 | NA         | NA         |
| S100a10     | 2505.96    | -0.8084837 | 0.35524199 | -2.2758676 | 0.02285394 | 0.1349797  |
| Zfp292      | 9019.68712 | -0.8101557 | 0.23767123 | -3.4087244 | 0.00065267 | 0.01074046 |
| Schip1      | 85.1070985 | -0.8107084 | 0.32894092 | -2.4646017 | 0.01371656 | 0.09547055 |
| Krt8        | 858.41288  | -0.8112929 | 0.41139458 | -1.9720555 | NA         | NA         |
| Dixdc1      | 1134.31015 | -0.8121212 | 0.23049987 | -3.5233041 | 0.0004262  | 0.00770682 |
| Catsperd    | 657.883501 | -0.8121302 | 0.27866165 | -2.9143955 | 0.00356378 | 0.03689771 |
| Tmem211     | 134.710445 | -0.8122039 | 0.38584866 | -2.1049806 | 0.035293   | 0.17767608 |
| Nuak1       | 381.028357 | -0.8127683 | 0.2884168  | -2.8180338 | 0.00483187 | 0.04573369 |
| Lcorl       | 1036.68446 | -0.812851  | 0.30424129 | -2.6717313 | 0.00754611 | 0.06353518 |
| Creb3l3     | 44.3120393 | -0.8131624 | 0.39385663 | -2.0646153 | 0.03895941 | 0.18833006 |
| Lrp8        | 1014.48218 | -0.8142677 | 0.30762513 | -2.6469478 | 0.00812219 | 0.06734001 |
| Preli2      | 2239.48539 | -0.8147064 | 0.34546    | -2.3583235 | 0.01835769 | 0.11671317 |
| Eps8l2      | 1755.58593 | -0.8152696 | 0.33948793 | -2.4014686 | 0.01632941 | 0.10764673 |
| Amica1      | 70.0056491 | -0.8157327 | 0.43176224 | -1.88931   | NA         | NA         |
| MacroD1     | 341.749777 | -0.8158655 | 0.35460903 | -2.3007465 | 0.02140596 | 0.12925061 |
| Eif4b       | 54188.9927 | -0.8159618 | 0.18522524 | -4.4052407 | 1.06E-05   | 0.00038939 |
| Pvrl4       | 113.06436  | -0.815985  | 0.32116847 | -2.540676  | 0.01106384 | 0.08267841 |
| Pde9a       | 171.463741 | -0.8161012 | 0.31718852 | -2.5729217 | 0.0100844  | 0.07794361 |
| Pcm1        | 13817.295  | -0.8165005 | 0.33005988 | -2.4737952 | 0.01336863 | 0.09381571 |

|             |            |            |            |            |            |            |
|-------------|------------|------------|------------|------------|------------|------------|
| 2310042E22F | 8.86211693 | -0.8165028 | 0.41716922 | -1.9572461 | 0.05031854 | 0.22060999 |
| Rgs3        | 981.921359 | -0.8165988 | 0.28224279 | -2.8932496 | 0.00381278 | 0.03855174 |
| Prkcb       | 151.667181 | -0.8167963 | 0.42612793 | -1.9167865 | 0.05526507 | 0.23353996 |
| Camkv       | 755.45748  | -0.8177473 | 0.23195919 | -3.5253929 | 0.00042286 | 0.00766413 |
| Ephb4       | 4335.03702 | -0.8183892 | 0.16305258 | -5.0191738 | 5.19E-07   | 3.22E-05   |
| Akap2       | 6514.32625 | -0.8187254 | 0.26423183 | -3.0985118 | 0.00194495 | 0.02396668 |
| Apoa2       | 111.126504 | -0.8201121 | 0.37257477 | -2.2012015 | NA         | NA         |
| Gm13247     | 10087.4094 | -0.8206012 | 0.21742981 | -3.7740973 | 0.00016059 | 0.0035778  |
| Nfix        | 180.84976  | -0.8210175 | 0.30542577 | -2.6881083 | 0.00718581 | 0.06118588 |
| Slc23a1     | 19.6386675 | -0.8210891 | 0.43149675 | -1.9028859 | 0.05705544 | 0.23824792 |
| Dmd         | 6040.60588 | -0.8214802 | 0.18071213 | -4.5457943 | 5.47E-06   | 0.00022671 |
| Hist1h4d    | 21.7097948 | -0.8219539 | 0.43084709 | -1.9077624 | 0.05642193 | 0.23662822 |
| Samm50      | 14295.5785 | -0.8234561 | 0.15995975 | -5.1478959 | 2.63E-07   | 1.76E-05   |
| Cpne9       | 187.459858 | -0.8234587 | 0.37012318 | -2.2248235 | 0.02609309 | 0.14613366 |
| Abi3        | 57.6205785 | -0.8234615 | 0.3851329  | -2.1381231 | 0.03250676 | 0.16806941 |
| Ush1c       | 138.417909 | -0.8244794 | 0.40152947 | -2.0533473 | 0.04003891 | 0.19132821 |
| Ntpcr       | 686.461145 | -0.824735  | 0.31473049 | -2.6204485 | 0.00878142 | 0.07079308 |
| Grp2        | 8.73513555 | -0.8250631 | 0.41863343 | -1.9708486 | 0.0487412  | 0.21604611 |
| Prkar1b     | 130.097103 | -0.8257872 | 0.35865627 | -2.3024474 | 0.02130995 | 0.12914425 |
| Ank3        | 1283.3323  | -0.8264872 | 0.20223543 | -4.0867579 | 4.37E-05   | 0.00126209 |
| Isoc1       | 4004.21337 | -0.8270519 | 0.187419   | -4.41285   | 1.02E-05   | 0.00038045 |
| Cux2        | 212.960155 | -0.828082  | 0.25624021 | -3.231663  | 0.00123072 | 0.01697938 |
| 1700019G17I | 294.91779  | -0.8290526 | 0.26097062 | -3.1768044 | 0.00148907 | 0.01954143 |
| Piwil4      | 45.7891384 | -0.8292065 | 0.43199147 | -1.9194975 | 0.05492141 | 0.23259335 |
| Tvp23a      | 42.2449046 | -0.8295003 | 0.41896127 | -1.9798974 | 0.04771506 | 0.21328452 |
| Kctd19      | 34.91018   | -0.8299435 | 0.43187419 | -1.9217251 | 0.05464036 | 0.23178183 |
| Serpinb1c   | 31.2286962 | -0.8300779 | 0.43204731 | -1.9212662 | 0.05469815 | 0.23190047 |
| Mypn        | 755.893477 | -0.8313148 | 0.2641568  | -3.1470507 | 0.00164926 | 0.02100549 |
| Radil       | 1214.92946 | -0.8318769 | 0.32468891 | -2.5620737 | 0.01040492 | 0.07959025 |
| Pdcl        | 4686.94081 | -0.832188  | 0.15010852 | -5.5439093 | 2.96E-08   | 2.71E-06   |
| Krt17       | 183.106864 | -0.832391  | 0.40315052 | -2.0647151 | 0.03894997 | 0.18833006 |
| Krt80       | 22.5716281 | -0.8325067 | 0.43198213 | -1.9271786 | 0.05395738 | 0.2301623  |
| Camkk1      | 725.741242 | -0.8333551 | 0.29034694 | -2.8702046 | 0.00410206 | 0.04050234 |
| Gbp9        | 123.568584 | -0.8340302 | 0.41634212 | -2.0032328 | 0.04515231 | 0.20609439 |
| Kif18a      | 5032.05595 | -0.8341105 | 0.1769596  | -4.7135644 | 2.43E-06   | 0.00011829 |
| Lbh         | 406.947445 | -0.8352519 | 0.38409281 | -2.1746096 | 0.02965938 | 0.15817321 |
| Camk2b      | 2358.90064 | -0.8364065 | 0.1979089  | -4.2262197 | 2.38E-05   | 0.00076834 |
| Fbxo47      | 102.899335 | -0.8366408 | 0.36385023 | -2.2994098 | 0.02148168 | 0.12956991 |
| Mx2         | 11.6332094 | -0.8368523 | 0.4138473  | -2.0221281 | 0.04316312 | 0.20028522 |
| 9830147E19F | 2904.7577  | -0.838775  | 0.19377291 | -4.3286492 | 1.50E-05   | 0.00052311 |
| Chml        | 2181.40911 | -0.8390833 | 0.18001603 | -4.6611591 | 3.14E-06   | 0.00014467 |

|           |            |            |            |            |            |            |
|-----------|------------|------------|------------|------------|------------|------------|
| Mybl1     | 2256.61466 | -0.8399223 | 0.25125069 | -3.3429652 | 0.00082888 | 0.01281308 |
| Syt7      | 288.236808 | -0.8413612 | 0.32544954 | -2.5852277 | 0.00973147 | 0.07593281 |
| Fubp1     | 18999.4966 | -0.8433239 | 0.20800329 | -4.0543778 | 5.03E-05   | 0.00139873 |
| Lrrc27    | 175.705963 | -0.8436802 | 0.33399398 | -2.526034  | 0.01153583 | 0.0849402  |
| Yes1      | 19065.2829 | -0.8437099 | 0.22404216 | -3.7658534 | 0.00016598 | 0.00368213 |
| Dsp       | 1143.78538 | -0.844857  | 0.37977147 | -2.2246457 | 0.02610503 | 0.14613366 |
| Plk4      | 4285.88832 | -0.8448999 | 0.19479672 | -4.3373416 | 1.44E-05   | 0.00050644 |
| Epm2a     | 80.6713886 | -0.8453804 | 0.37479244 | -2.2555963 | 0.02409592 | 0.13919603 |
| Cenpe     | 9457.11324 | -0.8474864 | 0.21355802 | -3.9684132 | 7.24E-05   | 0.00188785 |
| Fam183b   | 92.0452561 | -0.8475661 | 0.37908087 | -2.2358452 | 0.02536192 | 0.14367149 |
| Fgr       | 157.362344 | -0.8476747 | 0.28066724 | -3.0202123 | 0.00252598 | 0.02877761 |
| Rapgef1   | 267.993025 | -0.8478401 | 0.40692605 | -2.0835239 | 0.0372035  | 0.18285448 |
| Pcsk4     | 64.3885307 | -0.8478885 | 0.34651097 | -2.4469313 | 0.01440783 | 0.09900847 |
| Lnx1      | 204.268397 | -0.8480781 | 0.3953326  | -2.1452267 | 0.03193472 | 0.1663151  |
| Gatsl3    | 2692.18631 | -0.8481047 | 0.17413374 | -4.8704214 | 1.11E-06   | 6.12E-05   |
| Tfap2a    | 316.55831  | -0.8491772 | 0.39198315 | -2.1663614 | 0.03028358 | 0.16034729 |
| Jag1      | 1725.13264 | -0.8495722 | 0.28681275 | -2.9621145 | 0.00305534 | 0.03314913 |
| Fam83g    | 178.353186 | -0.8499917 | 0.34052086 | -2.4961517 | 0.01255489 | 0.08989    |
| Elavl2    | 3884.59901 | -0.8507696 | 0.22858556 | -3.7218871 | 0.00019774 | 0.0042473  |
| Gm10046   | 17.2952779 | -0.8516817 | 0.42660404 | -1.9964219 | NA         | NA         |
| Lbr       | 17112.9487 | -0.8518521 | 0.15745211 | -5.4102299 | 6.29E-08   | 5.12E-06   |
| Acot3     | 27.3926788 | -0.8527445 | 0.40850032 | -2.0875002 | 0.03684294 | 0.18223429 |
| Gng7      | 254.01957  | -0.8536153 | 0.25160598 | -3.3926671 | 0.00069216 | 0.01115413 |
| Tcf24     | 474.212951 | -0.8539794 | 0.33176666 | -2.5740364 | 0.01005197 | 0.07777025 |
| Gpc3      | 3033.5324  | -0.8543437 | 0.22763496 | -3.7531305 | 0.00017464 | 0.0038305  |
| Mpst      | 1299.62003 | -0.8563026 | 0.21991656 | -3.8937611 | 9.87E-05   | 0.0024285  |
| Loxhd1    | 14.7115542 | -0.857073  | 0.43226222 | -1.9827618 | 0.04739405 | 0.21227674 |
| Serinc5   | 854.00706  | -0.85893   | 0.24840366 | -3.4577995 | 0.00054461 | 0.00924426 |
| Calr3     | 222.976899 | -0.8601958 | 0.28689873 | -2.998256  | 0.00271529 | 0.03037809 |
| Wdr86     | 213.111152 | -0.8617086 | 0.4003901  | -2.1521726 | 0.03138377 | 0.16438159 |
| Zdhhc13   | 2819.09622 | -0.8628857 | 0.17673709 | -4.8823124 | 1.05E-06   | 5.82E-05   |
| Casc5     | 4104.1641  | -0.8630863 | 0.23845761 | -3.6194539 | 0.00029523 | 0.00577491 |
| Ceacam1   | 551.729244 | -0.8633669 | 0.24144456 | -3.5758391 | 0.00034911 | 0.00658646 |
| Rora      | 135.189686 | -0.8635816 | 0.30010352 | -2.8776125 | 0.00400697 | 0.03991826 |
| Cilp      | 30.3376159 | -0.863793  | 0.42100525 | -2.0517394 | NA         | NA         |
| Gad1      | 191.521596 | -0.8638246 | 0.38899408 | -2.2206625 | 0.02637383 | 0.14678734 |
| D8Ertd82e | 602.283891 | -0.866093  | 0.43195672 | -2.0050458 | 0.04495815 | 0.20548551 |
| Ttc25     | 871.759403 | -0.8680035 | 0.35995438 | -2.4114264 | 0.01589026 | 0.10570239 |
| Tmem121   | 203.637636 | -0.8680597 | 0.29475923 | -2.9449787 | 0.00322977 | 0.03456719 |
| Rbl1      | 2783.53595 | -0.8700942 | 0.20375958 | -4.2702    | 1.95E-05   | 0.00065034 |
| Ept1      | 1687.07373 | -0.8718726 | 0.36588527 | -2.3829125 | 0.01717628 | 0.11148091 |

|          |            |            |            |            |            |            |
|----------|------------|------------|------------|------------|------------|------------|
| P2ry2    | 286.766434 | -0.872024  | 0.42246418 | -2.0641371 | 0.03900472 | 0.18837864 |
| Usp26    | 542.176929 | -0.8723468 | 0.42399041 | -2.0574681 | 0.03964122 | 0.19014823 |
| Amn1     | 342.404695 | -0.8730122 | 0.2580869  | -3.3826289 | 0.00071796 | 0.01149838 |
| Gm5141   | 534.693891 | -0.8748076 | 0.18650925 | -4.6904249 | 2.73E-06   | 0.00012966 |
| Pgpep1l  | 120.05682  | -0.8758565 | 0.4321824  | -2.0265898 | NA         | NA         |
| Cdca2    | 7051.0362  | -0.8785866 | 0.18007467 | -4.8790129 | 1.07E-06   | 5.90E-05   |
| Pstpip2  | 345.965115 | -0.8786081 | 0.30209407 | -2.9083925 | 0.00363292 | 0.03738951 |
| Slc52a3  | 952.956371 | -0.8791679 | 0.33221044 | -2.6464185 | 0.00813491 | 0.06739797 |
| Prom2    | 22.2135592 | -0.8794918 | 0.42359888 | -2.0762372 | 0.03787202 | 0.1850873  |
| Paqr7    | 152.78441  | -0.8797668 | 0.27680516 | -3.1782891 | 0.00148147 | 0.0194745  |
| Sapcd1   | 207.376496 | -0.8800532 | 0.34528514 | -2.5487724 | 0.01081028 | 0.08133077 |
| Mx1      | 29.5989969 | -0.8804596 | 0.41462881 | -2.1234886 | 0.03371293 | 0.17199324 |
| Gm3414   | 244.62692  | -0.8845136 | 0.30441861 | -2.9055832 | 0.00366569 | 0.03760238 |
| Pold2    | 5854.05351 | -0.8847577 | 0.2200578  | -4.0205697 | 5.81E-05   | 0.00156474 |
| Fnip1    | 4941.814   | -0.8847751 | 0.22881677 | -3.8667405 | 0.0001103  | 0.00265111 |
| Ezh1     | 2922.73799 | -0.8852051 | 0.1890337  | -4.6827899 | 2.83E-06   | 0.00013256 |
| Fam83b   | 92.0460835 | -0.8852418 | 0.42528619 | -2.0815203 | NA         | NA         |
| Stard4   | 3079.43915 | -0.8860037 | 0.24796189 | -3.5731447 | 0.00035272 | 0.00662114 |
| Cdc42ep5 | 822.163937 | -0.8874927 | 0.21625574 | -4.1039037 | 4.06E-05   | 0.00118778 |
| Prodh    | 820.7924   | -0.8875753 | 0.22996669 | -3.8595819 | 0.00011358 | 0.00269797 |
| Rac3     | 399.301284 | -0.8876915 | 0.35565407 | -2.4959407 | 0.01256236 | 0.08990209 |
| Ttc29    | 59.0192317 | -0.8879546 | 0.35357517 | -2.5113601 | 0.01202669 | 0.08747547 |
| Cnpy1    | 1202.59637 | -0.8885216 | 0.21890901 | -4.0588629 | 4.93E-05   | 0.00138172 |
| Tac2     | 71.7582238 | -0.8887367 | 0.37903432 | -2.3447395 | 0.01904038 | 0.11953853 |
| Des      | 534.870673 | -0.8888169 | 0.28101943 | -3.1628308 | 0.00156243 | 0.02016379 |
| Klk13    | 43.2788209 | -0.8903911 | 0.41233355 | -2.1593953 | 0.03081951 | 0.16216525 |
| Slc37a1  | 666.595858 | -0.8907835 | 0.20177652 | -4.4147035 | 1.01E-05   | 0.00037905 |
| Onecut2  | 83.3089297 | -0.8913651 | 0.35176746 | -2.5339613 | 0.01127812 | 0.083927   |
| Cpxm2    | 61.4035806 | -0.8923138 | 0.42001873 | -2.1244619 | 0.03363154 | 0.17170192 |
| Pla2g2f  | 66.1339291 | -0.8927686 | 0.38592407 | -2.3133272 | 0.02070466 | 0.12673885 |
| Gbas     | 3035.21765 | -0.8934517 | 0.22317834 | -4.0033084 | 6.25E-05   | 0.00166044 |
| Dlgap5   | 9000.5229  | -0.8937654 | 0.15231298 | -5.8679532 | 4.41E-09   | 4.90E-07   |
| Mcmdc2   | 349.710044 | -0.8955566 | 0.25735285 | -3.4798784 | 0.00050164 | 0.0086678  |
| Spn      | 102.703707 | -0.89795   | 0.36723222 | -2.4451831 | 0.01447786 | 0.09927039 |
| Emp2     | 622.336127 | -0.8986699 | 0.27106708 | -3.3153046 | 0.00091543 | 0.01368837 |
| Fam46b   | 205.659181 | -0.8989639 | 0.26003929 | -3.4570311 | 0.00054616 | 0.00925203 |
| Crip1    | 1484.35103 | -0.8994751 | 0.33471202 | -2.6873106 | 0.00720299 | 0.06120971 |
| Plcd3    | 1121.98098 | -0.8995431 | 0.20968444 | -4.2899849 | 1.79E-05   | 0.00060276 |
| Cd109    | 801.020855 | -0.90099   | 0.38747306 | -2.3252971 | NA         | NA         |
| Xpnpep2  | 109.985155 | -0.90303   | 0.42988105 | -2.1006508 | NA         | NA         |
| Elavl3   | 145.992699 | -0.9037415 | 0.39244318 | -2.3028596 | 0.02128674 | 0.12914425 |

|             |            |            |            |            |            |            |
|-------------|------------|------------|------------|------------|------------|------------|
| 5830418K08F | 6496.19487 | -0.9042727 | 0.18233736 | -4.9593383 | 7.07E-07   | 4.15E-05   |
| Kif11       | 14645.393  | -0.9048262 | 0.18155796 | -4.9836768 | 6.24E-07   | 3.74E-05   |
| Gyk         | 1994.25306 | -0.9048294 | 0.25857604 | -3.4992778 | 0.00046652 | 0.0082348  |
| Fah         | 1181.75893 | -0.9053882 | 0.29929913 | -3.025028  | 0.0024861  | 0.02844174 |
| Tmem213     | 15.7005124 | -0.9056105 | 0.41479507 | -2.183272  | NA         | NA         |
| Kiss1       | 342.267107 | -0.9057253 | 0.39809495 | -2.275149  | 0.02289699 | 0.13501674 |
| Gas6        | 1589.50221 | -0.9062322 | 0.20838727 | -4.3487887 | 1.37E-05   | 0.00048826 |
| Fzd7        | 1770.49208 | -0.9082705 | 0.33110624 | -2.7431393 | 0.00608549 | 0.05426342 |
| Fam109b     | 104.549111 | -0.9088499 | 0.30606774 | -2.9694402 | 0.00298343 | 0.03269577 |
| Tmc3        | 35.6355253 | -0.9097289 | 0.4193623  | -2.169315  | 0.03005878 | 0.15962936 |
| Smad3       | 1973.09193 | -0.9103495 | 0.31919354 | -2.8520298 | 0.0043441  | 0.04225868 |
| E130018N17I | 157.417996 | -0.9117809 | 0.30083976 | -3.030786  | 0.00243918 | 0.0281831  |
| 1700018B08F | 41.5748537 | -0.9130707 | 0.39763073 | -2.2962779 | 0.02166    | 0.13018763 |
| Aspm        | 5775.32863 | -0.9134682 | 0.21851589 | -4.1803284 | 2.91E-05   | 0.00090898 |
| Tst         | 1164.8633  | -0.9165954 | 0.29072706 | -3.1527693 | 0.0016173  | 0.02073418 |
| Slc47a1     | 179.871923 | -0.9166215 | 0.30431429 | -3.0120882 | 0.00259457 | 0.02930383 |
| Pfkip       | 26432.8247 | -0.9178245 | 0.26415197 | -3.4746077 | 0.0005116  | 0.00881053 |
| Ddr2        | 3113.5349  | -0.9182409 | 0.25173129 | -3.6477027 | 0.0002646  | 0.00529566 |
| D430042O09  | 623.666915 | -0.9183225 | 0.22633852 | -4.0572967 | 4.96E-05   | 0.00138602 |
| Arhgef28    | 58.9704931 | -0.9183983 | 0.41384087 | -2.2192064 | 0.02647269 | 0.14713252 |
| Dll1        | 21.2997205 | -0.9185408 | 0.43045257 | -2.1338954 | 0.03285134 | 0.1692187  |
| Stx3        | 4922.3485  | -0.9186392 | 0.17436313 | -5.2685401 | 1.38E-07   | 1.01E-05   |
| Psd2        | 60.1702546 | -0.9189658 | 0.40218586 | -2.2849282 | 0.02231704 | 0.13256611 |
| Itgal       | 608.530571 | -0.91973   | 0.18889084 | -4.8691087 | 1.12E-06   | 6.14E-05   |
| Ankrd13d    | 303.566155 | -0.9201441 | 0.27431228 | -3.3543671 | 0.00079547 | 0.01243699 |
| Tcl1        | 6504.71157 | -0.9235749 | 0.23741824 | -3.8900757 | 0.00010021 | 0.00244649 |
| Tmem220     | 62.5252028 | -0.9237716 | 0.33659727 | -2.7444418 | 0.00606139 | 0.0541728  |
| Ppapdc3     | 66.1711514 | -0.924783  | 0.38486272 | -2.4028905 | 0.01626606 | 0.10742776 |
| Pcsk9       | 263.369568 | -0.9248114 | 0.35772805 | -2.5852359 | 0.00973124 | 0.07593281 |
| Crxos       | 6514.88957 | -0.9248215 | 0.27428347 | -3.3717725 | 0.00074686 | 0.01184554 |
| Nusap1      | 13454.6394 | -0.9262214 | 0.15533436 | -5.9627594 | 2.48E-09   | 2.97E-07   |
| Bmp6        | 48.7512587 | -0.9262498 | 0.43197763 | -2.1442079 | 0.03201623 | 0.1664297  |
| Mis18bp1    | 8908.78701 | -0.9279181 | 0.1754578  | -5.2885544 | 1.23E-07   | 9.34E-06   |
| AF529169    | 9.16937434 | -0.9287933 | 0.42358786 | -2.1926817 | 0.02833032 | 0.15431342 |
| Pdzrn3      | 579.991897 | -0.9297312 | 0.30180559 | -3.0805633 | 0.00206609 | 0.02498432 |
| Slc39a11    | 4131.16365 | -0.931284  | 0.28133338 | -3.3102504 | 0.00093213 | 0.013873   |
| Pfkm        | 3686.27185 | -0.9326119 | 0.1749623  | -5.3303595 | 9.80E-08   | 7.51E-06   |
| Tnfrsf22    | 694.347821 | -0.9335142 | 0.20869295 | -4.4731467 | 7.71E-06   | 0.00030192 |
| Nrp2        | 591.326824 | -0.9342084 | 0.43047358 | -2.1701876 | NA         | NA         |
| Gm2381      | 3865.55773 | -0.9360507 | 0.24281218 | -3.85504   | 0.00011571 | 0.00274301 |
| Thy1        | 203.919749 | -0.9361657 | 0.32045811 | -2.9213357 | 0.00348534 | 0.0362788  |

|             |            |            |            |            |            |            |
|-------------|------------|------------|------------|------------|------------|------------|
| P2rx6       | 11.1455046 | -0.936647  | 0.43149534 | -2.1707001 | 0.02995385 | 0.15925205 |
| Slc16a12    | 16.5224696 | -0.9370163 | 0.42917137 | -2.183315  | NA         | NA         |
| Ctnnd2      | 890.560374 | -0.9372527 | 0.25143214 | -3.7276566 | 0.00019327 | 0.00417433 |
| Ptchd1      | 26.4113033 | -0.9375999 | 0.41822132 | -2.2418749 | 0.02496946 | 0.14236991 |
| Khk         | 152.567064 | -0.9398382 | 0.36184143 | -2.597376  | 0.0093939  | 0.07389206 |
| Mal         | 964.883089 | -0.9399016 | 0.37527944 | -2.5045379 | 0.01226115 | 0.08852047 |
| Hormad1     | 3140.75973 | -0.9402101 | 0.29674655 | -3.1683943 | 0.00153283 | 0.01985579 |
| Tnfaip8l1   | 152.854964 | -0.9407998 | 0.3082762  | -3.051808  | 0.00227468 | 0.02683875 |
| Adamts15    | 82.9656552 | -0.9414973 | 0.32767908 | -2.8732299 | 0.00406298 | 0.04019838 |
| Gna15       | 754.047334 | -0.9424415 | 0.20155223 | -4.6759173 | 2.93E-06   | 0.00013585 |
| Zfp81       | 973.086449 | -0.9428799 | 0.21518438 | -4.3817303 | 1.18E-05   | 0.00042981 |
| Ptch1       | 2601.3798  | -0.9428852 | 0.27064523 | -3.4838418 | 0.00049427 | 0.00855948 |
| Xkr5        | 887.241472 | -0.943744  | 0.23137356 | -4.0788757 | 4.53E-05   | 0.00130082 |
| Hspb6       | 307.54925  | -0.9446621 | 0.21389786 | -4.4164168 | 1.00E-05   | 0.00037786 |
| C4b         | 38.9861282 | -0.9448082 | 0.4197759  | -2.2507443 | 0.02440174 | 0.140389   |
| A530054K11f | 1914.49817 | -0.9463508 | 0.22965611 | -4.1207296 | 3.78E-05   | 0.00111446 |
| Ckap5       | 15835.1202 | -0.9473319 | 0.1732393  | -5.4683432 | 4.54E-08   | 3.92E-06   |
| G2e3        | 4779.76035 | -0.9476744 | 0.19742084 | -4.8002753 | 1.58E-06   | 8.21E-05   |
| Ttk         | 5709.09519 | -0.9477224 | 0.15228891 | -6.2231872 | 4.87E-10   | 6.80E-08   |
| Nmnat2      | 2585.07619 | -0.947994  | 0.27851857 | -3.4037012 | 0.00066479 | 0.01084808 |
| Dclk2       | 2946.85281 | -0.9483538 | 0.24559898 | -3.8613915 | 0.00011274 | 0.00269319 |
| Bub1        | 13791.0926 | -0.9494159 | 0.21204233 | -4.477483  | 7.55E-06   | 0.00029963 |
| Ggt6        | 92.5593399 | -0.9507033 | 0.42248098 | -2.2502865 | NA         | NA         |
| Tceanc      | 794.961628 | -0.9507823 | 0.21139694 | -4.4976159 | 6.87E-06   | 0.00027472 |
| Nhs         | 62.5555886 | -0.9511686 | 0.37623864 | -2.5280991 | 0.0114682  | 0.08472551 |
| Aurkb       | 4299.45322 | -0.9516209 | 0.15676081 | -6.070528  | 1.27E-09   | 1.68E-07   |
| Poln        | 30.0189352 | -0.9526302 | 0.40001201 | -2.381504  | 0.0172421  | 0.11167511 |
| Gpr113      | 80.5009518 | -0.9528691 | 0.38233143 | -2.4922593 | 0.01269333 | 0.09046471 |
| Rragb       | 1637.27554 | -0.9532545 | 0.23088139 | -4.1287628 | 3.65E-05   | 0.00108655 |
| Tnfrsf26    | 16.6511765 | -0.954202  | 0.43174793 | -2.2100905 | 0.02709888 | 0.14948249 |
| Esrp1       | 109.201656 | -0.9550141 | 0.40895624 | -2.3352476 | 0.01953049 | 0.12168215 |
| Tnfaip8l3   | 21.7033312 | -0.9553943 | 0.43220692 | -2.2105021 | 0.02707033 | 0.14943938 |
| Mxra8       | 348.754209 | -0.9555905 | 0.24822765 | -3.8496536 | 0.00011828 | 0.00279552 |
| Scml4       | 44.1120531 | -0.9559565 | 0.37880427 | -2.5236159 | 0.01161548 | 0.08532466 |
| Fat2        | 138.423996 | -0.9560994 | 0.39547663 | -2.4175876 | 0.01562377 | 0.104332   |
| A330048O09  | 70.8665766 | -0.9563794 | 0.3763032  | -2.5415127 | 0.01103739 | 0.08256012 |
| Zfp85       | 463.555141 | -0.9564394 | 0.22214407 | -4.3054915 | 1.67E-05   | 0.0005707  |
| Prr15l      | 424.20774  | -0.9584135 | 0.26989768 | -3.5510252 | 0.00038373 | 0.00706206 |
| Mtap7d3     | 95.2295729 | -0.9594472 | 0.32332801 | -2.9674112 | 0.00300319 | 0.0328429  |
| Slc46a3     | 188.541011 | -0.9617625 | 0.36569516 | -2.629957  | 0.00853957 | 0.06949179 |
| 4930461G14l | 561.224616 | -0.9626772 | 0.29120744 | -3.3058127 | 0.00094701 | 0.01398576 |

|          |            |            |            |            |            |            |
|----------|------------|------------|------------|------------|------------|------------|
| Dkk3     | 1070.80761 | -0.9632346 | 0.26352713 | -3.655163  | 0.00025702 | 0.00517733 |
| Liph     | 2878.81922 | -0.9637551 | 0.29976279 | -3.2150593 | 0.00130418 | 0.01772972 |
| Hspb2    | 52.0151251 | -0.9683477 | 0.42074084 | -2.3015302 | 0.02136168 | 0.12925061 |
| BC055111 | 174.953002 | -0.9684377 | 0.26432648 | -3.6637939 | 0.00024851 | 0.00504508 |
| Copz2    | 1402.7627  | -0.9687014 | 0.43148481 | -2.2450417 | 0.02476546 | 0.1416891  |
| Msra     | 632.545407 | -0.9705725 | 0.1733429  | -5.5991473 | 2.15E-08   | 2.02E-06   |
| Ifi30    | 2710.31707 | -0.970805  | 0.24182809 | -4.0144427 | 5.96E-05   | 0.00158941 |
| Mpv17l   | 3041.11117 | -0.9714879 | 0.34177656 | -2.842465  | 0.00447661 | 0.04320681 |
| Zdhhc1   | 146.395168 | -0.9732322 | 0.2713184  | -3.5870481 | 0.00033444 | 0.00641297 |
| Cbs      | 3223.40288 | -0.9755591 | 0.33146541 | -2.94317   | 0.0032487  | 0.03461858 |
| Gna14    | 104.67867  | -0.9759292 | 0.43164819 | -2.2609366 | 0.02376318 | 0.13815664 |
| Zscan5b  | 792.242106 | -0.976261  | 0.43180045 | -2.2609078 | 0.02376497 | 0.13815664 |
| Fxyd6    | 4630.12645 | -0.9768626 | 0.42358135 | -2.3061983 | NA         | NA         |
| Cdkn1b   | 3090.39165 | -0.9778046 | 0.18798618 | -5.2014705 | 1.98E-07   | 1.37E-05   |
| Dcstamp  | 398.078944 | -0.9779076 | 0.36015764 | -2.715221  | 0.00662316 | 0.05773358 |
| Arl5c    | 350.206516 | -0.9788369 | 0.37275427 | -2.6259576 | 0.00864056 | 0.070057   |
| Cd7      | 56.757265  | -0.9792676 | 0.40108863 | -2.4415241 | 0.01462541 | 0.09992959 |
| Lhpp     | 1865.98954 | -0.9793523 | 0.18229395 | -5.3723799 | 7.77E-08   | 6.17E-06   |
| Ldhb     | 18597.0894 | -0.9793891 | 0.32484545 | -3.0149388 | 0.00257031 | 0.0291121  |
| Kif15    | 8191.95237 | -0.9796001 | 0.17922653 | -5.4657094 | 4.61E-08   | 3.94E-06   |
| Plbd1    | 412.102077 | -0.9806038 | 0.40970631 | -2.3934311 | 0.01669162 | 0.10938531 |
| Rassf6   | 30.0947112 | -0.9808588 | 0.4309249  | -2.276171  | 0.02283577 | 0.13492368 |
| Lzts1    | 44.1773831 | -0.9826584 | 0.41820889 | -2.3496833 | 0.01878939 | 0.11844095 |
| Fbxl2    | 445.604053 | -0.9826893 | 0.25879389 | -3.7971888 | 0.00014635 | 0.00336164 |
| Nes      | 2461.95129 | -0.9837689 | 0.25852956 | -3.8052475 | 0.00014166 | 0.00327339 |
| Abcc1    | 5816.76083 | -0.9843037 | 0.19360627 | -5.0840485 | 3.69E-07   | 2.36E-05   |
| Kcna2    | 47.756859  | -0.9878191 | 0.41875769 | -2.3589275 | 0.01832783 | 0.11661872 |
| Tspo2    | 222.654659 | -0.9885975 | 0.41653231 | -2.3733993 | 0.0176252  | 0.11358867 |
| Izumo1   | 48.1442307 | -0.9902427 | 0.43111969 | -2.296909  | 0.02162396 | 0.13008842 |
| Usp28    | 9640.78366 | -0.9906118 | 0.1819137  | -5.4455042 | 5.17E-08   | 4.32E-06   |
| Calb2    | 1194.397   | -0.9915493 | 0.38469425 | -2.5774997 | 0.0099518  | 0.07718724 |
| AA987161 | 1993.18331 | -0.992959  | 0.18778258 | -5.2878121 | 1.24E-07   | 9.34E-06   |
| Boll     | 199.439479 | -0.9942365 | 0.30976008 | -3.2096985 | 0.00132874 | 0.01793687 |
| Slc29a3  | 2012.22208 | -0.9944503 | 0.24465855 | -4.0646456 | 4.81E-05   | 0.00135523 |
| Upk3a    | 19.0349548 | -0.9946277 | 0.42335875 | -2.3493731 | 0.01880505 | 0.11849163 |
| Fam46c   | 132.22455  | -0.9965986 | 0.31188504 | -3.1954037 | 0.00139635 | 0.01867128 |
| Gm10768  | 58.6585227 | -0.9968363 | 0.42898766 | -2.3236946 | NA         | NA         |
| Agmat    | 14.9390169 | -0.9970227 | 0.42966354 | -2.3204731 | 0.0203153  | 0.12525197 |
| Thsd4    | 49.6572299 | -0.9975567 | 0.41196949 | -2.4214333 | 0.01545944 | 0.10349545 |
| Hs3st3b1 | 524.542258 | -0.9983235 | 0.34155699 | -2.9228606 | 0.00346832 | 0.03616167 |
| Napsa    | 82.1356381 | -0.9998268 | 0.38488299 | -2.5977423 | 0.00938389 | 0.07388771 |



|             |            |            |            |            |            |            |
|-------------|------------|------------|------------|------------|------------|------------|
| Kng1        | 35.5909421 | -1.0002411 | 0.41299647 | -2.4219119 | 0.01543909 | 0.10346038 |
| Kif14       | 3813.64339 | -1.0003409 | 0.20400112 | -4.903605  | 9.41E-07   | 5.34E-05   |
| Jph1        | 125.327302 | -1.0007732 | 0.41255385 | -2.4258    | 0.01527468 | 0.10269633 |
| Bnip3       | 3724.63354 | -1.0025753 | 0.42997417 | -2.3317105 | 0.01971592 | 0.1225919  |
| Asb9        | 52.7189741 | -1.0030456 | 0.40708703 | -2.4639586 | 0.0137412  | 0.09547055 |
| Mgst3       | 571.911057 | -1.0043664 | 0.34526644 | -2.9089603 | 0.00362633 | 0.03735909 |
| Dhx58       | 107.386472 | -1.0084872 | 0.37525215 | -2.6874921 | 0.00719908 | 0.06120971 |
| Tgm3        | 163.394528 | -1.0085558 | 0.39030783 | -2.5840008 | 0.00976616 | 0.07612706 |
| Cd19        | 28.3894853 | -1.0091659 | 0.4284608  | -2.3553284 | NA         | NA         |
| Depdc1a     | 810.993274 | -1.0099055 | 0.22217878 | -4.5454631 | 5.48E-06   | 0.00022671 |
| Igfbpl1     | 97.414011  | -1.0101931 | 0.37070013 | -2.725095  | 0.0064283  | 0.05629501 |
| 4930558J18R | 234.073751 | -1.0110953 | 0.2342296  | -4.3166847 | 1.58E-05   | 0.00054736 |
| Cnn2        | 1428.92723 | -1.0120678 | 0.30642321 | -3.3028433 | 0.0009571  | 0.01407758 |
| Ltb         | 86.0699848 | -1.0137079 | 0.37571547 | -2.6980733 | 0.00697421 | 0.05982125 |
| Apbb1       | 1030.83941 | -1.0137259 | 0.22370835 | -4.5314619 | 5.86E-06   | 0.00023909 |
| 1700028B04f | 37.6516275 | -1.01611   | 0.39367945 | -2.5810594 | 0.00984976 | 0.07662515 |
| Gas2l3      | 2639.33563 | -1.0177517 | 0.19523376 | -5.2129906 | 1.86E-07   | 1.30E-05   |
| A330021E22f | 132.49118  | -1.0180294 | 0.30082882 | -3.3840821 | 0.00071417 | 0.01144949 |
| Zfp872      | 31.0173101 | -1.0186662 | 0.43226799 | -2.3565616 | 0.01844501 | 0.1170291  |
| Syne3       | 148.574199 | -1.018725  | 0.29646112 | -3.4362854 | 0.00058975 | 0.00987211 |
| Ccdc66      | 1895.37789 | -1.0191078 | 0.19067353 | -5.3447784 | 9.05E-08   | 7.00E-06   |
| Acy3        | 252.526981 | -1.0196454 | 0.33508357 | -3.0429584 | 0.00234265 | 0.02735023 |
| Pdcl2       | 779.403838 | -1.0199201 | 0.23807652 | -4.2840012 | 1.84E-05   | 0.00061787 |
| Slc9a3r2    | 1584.61365 | -1.0204886 | 0.20350973 | -5.0144463 | 5.32E-07   | 3.24E-05   |
| Pbx1        | 749.460379 | -1.0216892 | 0.22241774 | -4.5935597 | 4.36E-06   | 0.00018898 |
| Chmp4c      | 3879.67655 | -1.0247626 | 0.16570888 | -6.1841137 | 6.25E-10   | 8.59E-08   |
| Il12rb1     | 61.2010268 | -1.0285378 | 0.42796699 | -2.4033111 | 0.01624736 | 0.10742462 |
| Ehhadh      | 860.57397  | -1.0287075 | 0.28060435 | -3.6660428 | 0.00024633 | 0.00500748 |
| Trpc5os     | 56.8202993 | -1.0294254 | 0.38931515 | -2.6441957 | 0.00818853 | 0.06769795 |
| Pap1        | 89.1152294 | -1.0316012 | 0.43108143 | -2.3930542 | 0.01670877 | 0.10943237 |
| Lipa        | 609.870065 | -1.0318293 | 0.26286917 | -3.9252578 | 8.66E-05   | 0.00218008 |
| Elavl4      | 97.4510537 | -1.0320733 | 0.3108144  | -3.3205454 | 0.00089842 | 0.01352497 |
| Kcnh6       | 40.3019691 | -1.0328179 | 0.36888578 | -2.7998311 | 0.00511293 | 0.0477545  |
| Ndr1        | 1382.11878 | -1.0332258 | 0.29361197 | -3.5190181 | 0.00043315 | 0.00777814 |
| Ttpa        | 1547.48409 | -1.0384061 | 0.27379109 | -3.792695  | 0.00014902 | 0.00340298 |
| Aldh1l1     | 3513.24517 | -1.0410235 | 0.25189775 | -4.1327223 | 3.58E-05   | 0.00107416 |
| Sema4a      | 354.781733 | -1.0436912 | 0.24720768 | -4.2219205 | 2.42E-05   | 0.00077829 |
| C8b         | 33.7000817 | -1.044144  | 0.42529852 | -2.4550849 | 0.01408513 | 0.09739345 |
| Sec14l5     | 41.6798476 | -1.0449293 | 0.42665698 | -2.4491087 | 0.01432102 | 0.09845545 |
| Hjurp       | 732.759343 | -1.0462243 | 0.27610022 | -3.7892919 | 0.00015108 | 0.0034348  |
| Slc1a1      | 2635.00481 | -1.046581  | 0.17739715 | -5.8996496 | 3.64E-09   | 4.10E-07   |

|         |            |            |            |            |            |            |
|---------|------------|------------|------------|------------|------------|------------|
| Cadps   | 77.0530122 | -1.0472954 | 0.37864711 | -2.7658877 | 0.00567681 | 0.05171649 |
| Anxa5   | 815.926762 | -1.0473074 | 0.28472891 | -3.6782616 | 0.00023483 | 0.00481771 |
| Gfod1   | 200.444866 | -1.0485363 | 0.30529891 | -3.434458  | 0.00059374 | 0.00991756 |
| Gfra1   | 33.5548894 | -1.0494668 | 0.43168966 | -2.4310676 | 0.0150544  | 0.10169897 |
| Nol3    | 219.320515 | -1.0500781 | 0.35336349 | -2.9716654 | 0.00296189 | 0.03252852 |
| Padi3   | 329.788864 | -1.0505782 | 0.38649071 | -2.7182495 | 0.00656283 | 0.05730804 |
| Zfp442  | 287.609141 | -1.0514839 | 0.29007652 | -3.6248499 | 0.00028913 | 0.00567708 |
| Fam83f  | 15.2789788 | -1.0540434 | 0.43007089 | -2.4508597 | 0.01425155 | 0.09815139 |
| Lym7    | 137.21086  | -1.0550003 | 0.38892395 | -2.7126134 | 0.00667549 | 0.05815721 |
| Armcx1  | 3100.72214 | -1.0590581 | 0.25788523 | -4.1067032 | 4.01E-05   | 0.00117984 |
| Tbc1d9  | 1058.35739 | -1.0615293 | 0.25641744 | -4.1398483 | 3.48E-05   | 0.00104536 |
| Rsph1   | 193.839829 | -1.0623325 | 0.34605514 | -3.0698361 | 0.00214176 | 0.02564015 |
| Stac2   | 736.455329 | -1.0625264 | 0.2703597  | -3.9300474 | 8.49E-05   | 0.00215806 |
| Gstp2   | 2459.84344 | -1.0634245 | 0.29680882 | -3.5828601 | 0.00033985 | 0.00648472 |
| Zc3h6   | 276.511928 | -1.0652476 | 0.37426106 | -2.8462689 | 0.00442348 | 0.04280621 |
| Fes     | 264.141986 | -1.0717223 | 0.26173613 | -4.094667  | 4.23E-05   | 0.00122889 |
| Cers4   | 1270.32893 | -1.0728929 | 0.43223904 | -2.4821749 | 0.01305831 | 0.09230448 |
| Kif20b  | 12550.9021 | -1.0731138 | 0.19027953 | -5.6396702 | 1.70E-08   | 1.67E-06   |
| Mybpc2  | 355.804223 | -1.0742593 | 0.38815438 | -2.7676084 | 0.00564693 | 0.05158766 |
| Zmynd10 | 19.514958  | -1.0776592 | 0.43099389 | -2.5004049 | 0.01240514 | 0.08917065 |
| Slc16a3 | 3457.45223 | -1.0812223 | 0.36736646 | -2.943171  | 0.00324869 | 0.03461858 |
| Kcnn1   | 332.94681  | -1.0821192 | 0.40592791 | -2.6657916 | 0.00768073 | 0.06438977 |
| Foxr2   | 81.7641355 | -1.0822039 | 0.34344377 | -3.1510367 | 0.00162692 | 0.02080612 |
| Clcn6   | 2095.42326 | -1.082564  | 0.22521836 | -4.8067308 | 1.53E-06   | 8.06E-05   |
| Vax2    | 403.094886 | -1.0842365 | 0.31519996 | -3.4398369 | 0.00058206 | 0.0097645  |
| Osm     | 1152.10206 | -1.0856128 | 0.25773791 | -4.2120805 | 2.53E-05   | 0.00080352 |
| Klk1    | 292.431081 | -1.0865538 | 0.30342502 | -3.5809632 | 0.00034233 | 0.00650803 |
| Fam163b | 23.0710532 | -1.0869401 | 0.43209448 | -2.5155149 | 0.01188587 | 0.08670295 |
| Dtna    | 151.478421 | -1.0870011 | 0.28722107 | -3.784545  | 0.00015399 | 0.0034671  |
| Mmel1   | 55.7144957 | -1.0870785 | 0.37361668 | -2.909609  | 0.00361881 | 0.03734316 |
| Zfp39   | 648.135033 | -1.0888083 | 0.20596405 | -5.2863997 | 1.25E-07   | 9.37E-06   |
| Oas1c   | 281.025447 | -1.0944265 | 0.31603194 | -3.4630249 | 0.00053414 | 0.00913234 |
| Spata21 | 95.2477766 | -1.0951795 | 0.42671526 | -2.5665347 | NA         | NA         |
| Bahcc1  | 2838.31847 | -1.0962149 | 0.22920985 | -4.7825821 | 1.73E-06   | 8.84E-05   |
| Myo1a   | 711.42046  | -1.0965362 | 0.29113546 | -3.7664124 | 0.00016561 | 0.00367915 |
| Zfp764  | 220.09921  | -1.0969979 | 0.29420795 | -3.728648  | 0.00019251 | 0.00416373 |
| Gng2    | 2673.90502 | -1.0976491 | 0.20483814 | -5.3586168 | 8.39E-08   | 6.55E-06   |
| Paqr5   | 35.2811978 | -1.0987833 | 0.42659343 | -2.5757155 | 0.01000329 | 0.07750931 |
| Sgol2   | 10611.6021 | -1.1015374 | 0.15973242 | -6.8961414 | 5.34E-12   | 1.15E-09   |
| Pir     | 2122.24435 | -1.1019205 | 0.19091051 | -5.7719216 | 7.84E-09   | 8.13E-07   |
| Cyth3   | 749.517973 | -1.1036476 | 0.29293487 | -3.7675527 | 0.00016486 | 0.00366763 |

|             |            |            |            |            |            |            |
|-------------|------------|------------|------------|------------|------------|------------|
| Prlr        | 53.8481778 | -1.1052279 | 0.43073133 | -2.5659334 | NA         | NA         |
| Top2a       | 72922.6616 | -1.1083264 | 0.15792752 | -7.0179432 | 2.25E-12   | 5.31E-10   |
| BC021614    | 418.858506 | -1.1136765 | 0.27019986 | -4.1216769 | 3.76E-05   | 0.001112   |
| Ldb3        | 257.510475 | -1.1137624 | 0.32040174 | -3.4761434 | 0.00050868 | 0.00876994 |
| Slc36a2     | 21.3679068 | -1.1147219 | 0.42247521 | -2.6385497 | 0.00832615 | 0.0682911  |
| AI427809    | 146.432365 | -1.1202099 | 0.43100929 | -2.5990388 | 0.00934852 | 0.07382763 |
| Prokr1      | 18.1927817 | -1.1204632 | 0.43187739 | -2.594401  | 0.00947559 | 0.07442166 |
| Rtkn2       | 1291.71356 | -1.1224559 | 0.16437742 | -6.8285283 | 8.58E-12   | 1.71E-09   |
| Opn3        | 71.1284866 | -1.1226602 | 0.33273879 | -3.3739986 | 0.00074085 | 0.01178008 |
| Gpx2        | 3658.07428 | -1.124627  | 0.2839119  | -3.9611829 | 7.46E-05   | 0.00193944 |
| Ap1s3       | 113.405884 | -1.1248116 | 0.35366791 | -3.1804176 | 0.00147063 | 0.01934836 |
| Cep112      | 378.532276 | -1.1250248 | 0.22549949 | -4.989035  | 6.07E-07   | 3.66E-05   |
| Ndufa4l2    | 243.38541  | -1.1264156 | 0.40838239 | -2.7582375 | 0.0058114  | 0.05260362 |
| Notum       | 3760.05594 | -1.1275847 | 0.17117337 | -6.5873837 | 4.48E-11   | 7.57E-09   |
| Fam57b      | 57.1148329 | -1.1279964 | 0.38887109 | -2.9006949 | 0.00372336 | 0.03793677 |
| Aipl1       | 19.0867663 | -1.1296095 | 0.4292411  | -2.6316434 | 0.0084973  | 0.06922027 |
| Kcnh8       | 14.5135736 | -1.1307309 | 0.40664417 | -2.7806396 | 0.00542519 | 0.05010161 |
| Sat1        | 5812.97782 | -1.1332513 | 0.25084555 | -4.5177252 | 6.25E-06   | 0.0002538  |
| Them5       | 133.043631 | -1.1347143 | 0.29938943 | -3.7900947 | 0.00015059 | 0.00343376 |
| Car12       | 106.184702 | -1.1360647 | 0.31761466 | -3.5768647 | 0.00034774 | 0.00657872 |
| Ciita       | 31.8991995 | -1.1363832 | 0.43087692 | -2.6373731 | 0.00835509 | 0.06842022 |
| Lef1        | 496.216847 | -1.1365424 | 0.42609284 | -2.6673587 | 0.007645   | 0.06417696 |
| Mpp2        | 266.23363  | -1.1368402 | 0.34719892 | -3.2743195 | 0.00105917 | 0.01525104 |
| Diras1      | 24.7721368 | -1.1370894 | 0.42203532 | -2.6942991 | 0.00705368 | 0.06030338 |
| Ppp1r3b     | 699.236601 | -1.1434978 | 0.22199851 | -5.1509255 | 2.59E-07   | 1.74E-05   |
| Mctp2       | 147.460967 | -1.1440909 | 0.39668056 | -2.8841617 | 0.00392457 | 0.03945121 |
| Rcn3        | 1674.00662 | -1.1452917 | 0.28208327 | -4.0601192 | 4.90E-05   | 0.00137928 |
| Bnc2        | 536.866498 | -1.1466354 | 0.27099507 | -4.2312038 | 2.32E-05   | 0.00075622 |
| Armxc3      | 66.7422089 | -1.1490805 | 0.32516899 | -3.5337948 | 0.00040964 | 0.00745064 |
| Rassf4      | 451.645941 | -1.1506733 | 0.39031624 | -2.9480538 | 0.00319781 | 0.03427237 |
| 4933431E20F | 65.1788353 | -1.1545191 | 0.4287734  | -2.6926091 | 0.00708953 | 0.06057656 |
| Cd6         | 57.100413  | -1.1550083 | 0.41507751 | -2.7826329 | 0.00539198 | 0.04988141 |
| Zfp712      | 315.869568 | -1.1558459 | 0.31735753 | -3.6420939 | 0.00027043 | 0.00537781 |
| Mfap4       | 114.96995  | -1.1580275 | 0.37581838 | -3.0813488 | 0.00206065 | 0.02495731 |
| 4933404O12I | 1437.67663 | -1.1581072 | 0.22373953 | -5.1761403 | 2.27E-07   | 1.55E-05   |
| Zfp385c     | 38.3200946 | -1.1611551 | 0.38386864 | -3.0248762 | 0.00248735 | 0.02844174 |
| Sema6a      | 152.773193 | -1.1622728 | 0.38159415 | -3.0458349 | 0.00232035 | 0.02723305 |
| Steap2      | 563.237046 | -1.1637592 | 0.28959069 | -4.0186348 | 5.85E-05   | 0.00156678 |
| Mki67       | 13429.9884 | -1.1645791 | 0.2070168  | -5.6255296 | 1.85E-08   | 1.78E-06   |
| 2810408A11f | 439.90286  | -1.1647727 | 0.3331658  | -3.4960753 | 0.00047216 | 0.00828723 |
| B3galnt1    | 329.463564 | -1.1679841 | 0.26099183 | -4.475175  | 7.63E-06   | 0.00029986 |

|             |            |            |            |            |            |            |
|-------------|------------|------------|------------|------------|------------|------------|
| Vpreb2      | 20.1508785 | -1.1700635 | 0.42670877 | -2.7420659 | 0.00610541 | 0.05439198 |
| Rasgrp1     | 1508.17931 | -1.1701769 | 0.26741515 | -4.3758812 | 1.21E-05   | 0.00044046 |
| Ttyh1       | 936.293172 | -1.1704046 | 0.2299255  | -5.0903646 | 3.57E-07   | 2.30E-05   |
| Gldc        | 13531.6308 | -1.1706636 | 0.23623213 | -4.9555645 | 7.21E-07   | 4.22E-05   |
| Ninj1       | 1199.44323 | -1.1714377 | 0.25563827 | -4.5824035 | 4.60E-06   | 0.00019675 |
| Acss1       | 3351.68597 | -1.177471  | 0.23882937 | -4.9301768 | 8.22E-07   | 4.73E-05   |
| Ccno        | 114.203778 | -1.1781057 | 0.32951439 | -3.5752785 | 0.00034986 | 0.00658668 |
| Kcns3       | 560.598007 | -1.1835099 | 0.30507929 | -3.8793519 | 0.00010474 | 0.00253303 |
| Kbtbd11     | 1155.41905 | -1.1847448 | 0.39677143 | -2.9859628 | 0.00282687 | 0.03139234 |
| Lefty2      | 10157.7353 | -1.1848231 | 0.42776906 | -2.7697728 | 0.00560954 | 0.05134431 |
| Camta1      | 1617.07102 | -1.185508  | 0.2424938  | -4.8888179 | 1.01E-06   | 5.67E-05   |
| Plxdc1      | 532.432282 | -1.1892518 | 0.32672679 | -3.6398968 | 0.00027275 | 0.00541007 |
| C1s2        | 35.5758463 | -1.189275  | 0.43138612 | -2.756869  | NA         | NA         |
| Tcl1b2      | 23.3212319 | -1.1899812 | 0.41111392 | -2.894529  | 0.00379728 | 0.03844497 |
| Ccdc136     | 1963.6105  | -1.1913474 | 0.33346336 | -3.5726486 | 0.00035339 | 0.00662114 |
| Pabpc4l     | 148.85565  | -1.1949278 | 0.3354393  | -3.5622773 | 0.00036765 | 0.00685534 |
| Ifngr2      | 303.333259 | -1.1979822 | 0.26203958 | -4.5717603 | 4.84E-06   | 0.00020438 |
| Zfp273      | 508.472715 | -1.1986357 | 0.28578013 | -4.1942585 | 2.74E-05   | 0.00086007 |
| Ttc12       | 966.04752  | -1.1987134 | 0.24969117 | -4.8007839 | 1.58E-06   | 8.21E-05   |
| Rnft2       | 309.16566  | -1.2004075 | 0.3026686  | -3.9660785 | 7.31E-05   | 0.00190323 |
| Pgap1       | 4191.96321 | -1.2043998 | 0.27848742 | -4.3247907 | 1.53E-05   | 0.00052997 |
| Cdh3        | 1963.67853 | -1.205559  | 0.33622251 | -3.5855986 | 0.00033631 | 0.00644076 |
| Nlrp4a      | 411.113227 | -1.2090621 | 0.33681438 | -3.5896986 | 0.00033106 | 0.00635595 |
| Rln3        | 92.883116  | -1.2097675 | 0.31885872 | -3.794055  | 0.00014821 | 0.00339435 |
| Acbd4       | 783.937745 | -1.2102302 | 0.28608147 | -4.230369  | 2.33E-05   | 0.00075745 |
| Cacng5      | 28.2237194 | -1.213911  | 0.42961162 | -2.8256009 | 0.0047192  | 0.04507882 |
| Cyp2s1      | 627.517899 | -1.2158631 | 0.36445943 | -3.3360724 | 0.00084971 | 0.0130314  |
| Matn1       | 133.339683 | -1.2159281 | 0.36389344 | -3.34144   | 0.00083345 | 0.01284075 |
| Rnf182      | 143.579162 | -1.216527  | 0.30121975 | -4.0386695 | 5.38E-05   | 0.00147174 |
| Peli3       | 130.94672  | -1.2197757 | 0.29208834 | -4.1760505 | 2.97E-05   | 0.00091703 |
| Klf17       | 24.4593038 | -1.2204725 | 0.42043257 | -2.9028971 | 0.00369728 | 0.03777187 |
| 1190005I06R | 295.744992 | -1.2248324 | 0.31961152 | -3.8322536 | 0.00012697 | 0.0029693  |
| Eppk1       | 283.606608 | -1.2256335 | 0.38759197 | -3.1621747 | 0.00156596 | 0.02017579 |
| Trim61      | 40.6314674 | -1.226016  | 0.41618093 | -2.9458726 | 0.00322045 | 0.03449119 |
| Sec14l4     | 307.006728 | -1.2267583 | 0.31946359 | -3.8400569 | 0.00012301 | 0.00289228 |
| 9430041J12R | 25.4393487 | -1.2312634 | 0.40442664 | -3.0444667 | 0.00233093 | 0.02730362 |
| Hdac7       | 1030.59711 | -1.2348413 | 0.2975713  | -4.1497326 | 3.33E-05   | 0.00101497 |
| Sulf1       | 2681.90551 | -1.2353732 | 0.24618571 | -5.0180539 | 5.22E-07   | 3.22E-05   |
| Lima1       | 19221.0708 | -1.2380195 | 0.19633292 | -6.3057153 | 2.87E-10   | 4.29E-08   |
| Hmmr        | 14220.2506 | -1.2390809 | 0.1740146  | -7.1205573 | 1.07E-12   | 2.70E-10   |
| Ubash3a     | 650.619906 | -1.2401513 | 0.22442892 | -5.5258087 | 3.28E-08   | 2.98E-06   |

|             |            |            |            |            |            |            |
|-------------|------------|------------|------------|------------|------------|------------|
| Gstm5       | 286.612793 | -1.2447461 | 0.38675706 | -3.2184185 | 0.001289   | 0.01758349 |
| Mb          | 48.0670826 | -1.2468159 | 0.39286819 | -3.173624  | 0.00150549 | 0.0196417  |
| Siglec5     | 195.45247  | -1.2502311 | 0.37235006 | -3.3576766 | 0.00078601 | 0.01232379 |
| Dio3        | 260.426148 | -1.256752  | 0.4257665  | -2.9517399 | 0.00315989 | 0.03395953 |
| Hck         | 1031.05091 | -1.2636945 | 0.38202064 | -3.307922  | 0.00093991 | 0.0139604  |
| Axl         | 355.990817 | -1.2660234 | 0.37963912 | -3.3348077 | 0.00085358 | 0.01307642 |
| Sacs        | 150.413953 | -1.2723493 | 0.36906598 | -3.4474847 | 0.00056583 | 0.00952301 |
| F730043M19  | 31.8015941 | -1.2746105 | 0.39326441 | -3.2411032 | 0.00119068 | 0.01666516 |
| Kctd12b     | 46.9234109 | -1.2759929 | 0.42056701 | -3.0339825 | 0.00241348 | 0.02794646 |
| Tgfb1       | 366.982183 | -1.2776882 | 0.30959664 | -4.1269447 | 3.68E-05   | 0.00109307 |
| Ephx1       | 1663.20376 | -1.2810832 | 0.20581483 | -6.2244456 | 4.83E-10   | 6.80E-08   |
| Rab44       | 76.0491551 | -1.2827109 | 0.37790698 | -3.3942503 | 0.00068817 | 0.01111671 |
| Ebf1        | 582.955118 | -1.2828517 | 0.26877031 | -4.773041  | 1.81E-06   | 9.15E-05   |
| Ccne2       | 1227.94051 | -1.2840556 | 0.17877351 | -7.182583  | 6.84E-13   | 1.80E-10   |
| Pde2a       | 82.7205694 | -1.2847874 | 0.29997685 | -4.2829553 | 1.84E-05   | 0.00061944 |
| A930015D03  | 132.265685 | -1.285942  | 0.40470598 | -3.1774721 | 0.00148565 | 0.01951296 |
| Lmo1        | 227.131168 | -1.2871685 | 0.26939874 | -4.7779307 | 1.77E-06   | 8.97E-05   |
| Tuba8       | 24.0859792 | -1.2874836 | 0.41992824 | -3.0659611 | 0.00216972 | 0.02590952 |
| Cort        | 34.7419946 | -1.2881519 | 0.42247742 | -3.0490431 | 0.00229572 | 0.02700504 |
| Dpysl5      | 932.797898 | -1.2942742 | 0.31255523 | -4.1409456 | 3.46E-05   | 0.00104239 |
| Muc2        | 21.9559378 | -1.2966039 | 0.42377948 | -3.0596193 | 0.00221618 | 0.02634646 |
| Gjb1        | 57.8595878 | -1.3017534 | 0.43200252 | -3.0133005 | 0.00258423 | 0.02924843 |
| Cdhr1       | 1250.18655 | -1.3034199 | 0.28693474 | -4.5425656 | 5.56E-06   | 0.00022863 |
| Gm5801      | 141.979719 | -1.304096  | 0.43173054 | -3.0206248 | 0.00252254 | 0.02877496 |
| Abcc8       | 65.7779095 | -1.3124716 | 0.40818026 | -3.2154215 | 0.00130253 | 0.01772972 |
| Pdzrn4      | 240.49617  | -1.3127918 | 0.35402295 | -3.708211  | 0.00020873 | 0.00444041 |
| Serpinb1a   | 1930.47771 | -1.3143025 | 0.23942654 | -5.4893769 | 4.03E-08   | 3.52E-06   |
| Serpinb6b   | 99.9928512 | -1.3182061 | 0.35863019 | -3.6756696 | 0.00023723 | 0.00485915 |
| Cenpf       | 10816.3655 | -1.3202856 | 0.22977502 | -5.7459925 | 9.14E-09   | 9.29E-07   |
| Syt4        | 28.3381204 | -1.3217886 | 0.42280542 | -3.1262338 | 0.00177061 | 0.02222333 |
| Fcgr3       | 30.0639828 | -1.3284561 | 0.42868345 | -3.0989208 | 0.00194227 | 0.0239526  |
| Esco2       | 12324.0556 | -1.3288729 | 0.16488551 | -8.0593672 | 7.67E-16   | 4.26E-13   |
| Ccdc170     | 229.611459 | -1.3314901 | 0.30105475 | -4.4227506 | 9.75E-06   | 0.00037053 |
| Pla1a       | 1593.71354 | -1.3318557 | 0.36601828 | -3.6387682 | 0.00027395 | 0.00542691 |
| Mfng        | 317.284025 | -1.334409  | 0.26370155 | -5.0603    | 4.19E-07   | 2.62E-05   |
| Abhd8       | 574.53654  | -1.3350877 | 0.20944903 | -6.3742842 | 1.84E-10   | 2.86E-08   |
| Ska1        | 1638.23388 | -1.3352235 | 0.20599254 | -6.4819021 | 9.06E-11   | 1.50E-08   |
| Akr1b8      | 475.950285 | -1.3401478 | 0.35663262 | -3.7577825 | 0.00017143 | 0.0037803  |
| C330021F23F | 238.403877 | -1.3404287 | 0.2960298  | -4.5280194 | 5.95E-06   | 0.00024238 |
| Qprt        | 587.692867 | -1.3409961 | 0.34453127 | -3.8922333 | 9.93E-05   | 0.00242864 |
| Cacna2d4    | 15.0389068 | -1.343357  | 0.4322704  | -3.1076776 | 0.00188564 | 0.02342135 |

|             |            |            |            |            |            |            |
|-------------|------------|------------|------------|------------|------------|------------|
| Ly6e        | 6874.8962  | -1.3468523 | 0.22041788 | -6.1104493 | 9.94E-10   | 1.34E-07   |
| Aldh3b2     | 62.5446379 | -1.3585576 | 0.43203895 | -3.1445257 | 0.00166356 | 0.02113567 |
| Dnajc5g     | 386.530307 | -1.3589514 | 0.35165396 | -3.8644563 | 0.00011134 | 0.00266985 |
| Myh14       | 1120.27812 | -1.3690754 | 0.31393939 | -4.3609544 | 1.29E-05   | 0.00046724 |
| Pnlip       | 35.8636361 | -1.3730791 | 0.41567301 | -3.3032674 | NA         | NA         |
| Pga5        | 303.015517 | -1.3745402 | 0.39380716 | -3.4903891 | 0.00048232 | 0.00840866 |
| Capn11      | 94.5919716 | -1.3821856 | 0.4205622  | -3.2865189 | 0.00101434 | 0.01474205 |
| Fut9        | 2999.09125 | -1.3837698 | 0.21888487 | -6.3219069 | 2.58E-10   | 3.90E-08   |
| Map2        | 275.930522 | -1.3849498 | 0.31898123 | -4.341791  | 1.41E-05   | 0.00050292 |
| Lrfn3       | 106.845896 | -1.3932215 | 0.358943   | -3.8814561 | 0.00010383 | 0.00251512 |
| 3632451O06I | 1036.01776 | -1.3995453 | 0.20710508 | -6.7576578 | 1.40E-11   | 2.69E-09   |
| Prom1       | 556.551085 | -1.3996388 | 0.21870813 | -6.3995736 | 1.56E-10   | 2.45E-08   |
| Dusp4       | 128.593001 | -1.4020433 | 0.39647639 | -3.5362591 | 0.00040584 | 0.00739012 |
| 4933408N05I | 16.3273315 | -1.4029296 | 0.43024953 | -3.2607347 | 0.00111124 | 0.01581051 |
| Glipr2      | 3057.57942 | -1.4069419 | 0.20487023 | -6.8674783 | 6.53E-12   | 1.37E-09   |
| Crnde       | 187.474545 | -1.4099323 | 0.31225522 | -4.5153203 | 6.32E-06   | 0.00025536 |
| Mcf2l       | 698.979732 | -1.4127909 | 0.27811599 | -5.079862  | 3.78E-07   | 2.41E-05   |
| Hebp1       | 1610.97299 | -1.4127943 | 0.36833164 | -3.8356584 | 0.00012523 | 0.00293729 |
| Scara5      | 125.365794 | -1.4130247 | 0.42757461 | -3.3047442 | NA         | NA         |
| 9430069I07R | 15.5693999 | -1.4187378 | 0.4319496  | -3.2844986 | 0.00102164 | 0.01480619 |
| Lst1        | 139.703054 | -1.4193171 | 0.39395696 | -3.6027212 | 0.0003149  | 0.00609087 |
| Pipox       | 3394.05571 | -1.4205378 | 0.21420152 | -6.6317821 | 3.32E-11   | 5.86E-09   |
| Ddo         | 28.9660208 | -1.4227478 | 0.43043231 | -3.3053927 | 0.00094843 | 0.01398661 |
| Lefty1      | 1771.02434 | -1.4282346 | 0.43188263 | -3.3069972 | 0.00094302 | 0.01398576 |
| 4930433N12I | 15.3962505 | -1.4356229 | 0.43164365 | -3.3259448 | 0.00088119 | 0.01334318 |
| Lingo3      | 125.292651 | -1.4408181 | 0.37015492 | -3.8924733 | 9.92E-05   | 0.00242864 |
| Gpx6        | 197.868644 | -1.4433149 | 0.3986337  | -3.6206546 | 0.00029386 | 0.00575541 |
| Acot1       | 272.4862   | -1.4510916 | 0.29189109 | -4.9713461 | 6.65E-07   | 3.92E-05   |
| Dtx1        | 1672.97982 | -1.455996  | 0.25928231 | -5.6154851 | 1.96E-08   | 1.87E-06   |
| Gm4349      | 116.057124 | -1.4583033 | 0.34437308 | -4.2346612 | 2.29E-05   | 0.00074781 |
| Tdrd12      | 5826.39537 | -1.4589246 | 0.22968603 | -6.3518212 | 2.13E-10   | 3.24E-08   |
| Ttll8       | 37.6777263 | -1.4598952 | 0.37302181 | -3.9136992 | 9.09E-05   | 0.00226156 |
| 1700123I01R | 117.200728 | -1.469797  | 0.35945739 | -4.0889326 | 4.33E-05   | 0.00125498 |
| Spire2      | 1400.03132 | -1.4751614 | 0.27971491 | -5.2738033 | 1.34E-07   | 9.90E-06   |
| E2f8        | 1224.10524 | -1.4812604 | 0.29962191 | -4.9437653 | 7.66E-07   | 4.43E-05   |
| 5033404E19F | 55.9859887 | -1.4849371 | 0.39443805 | -3.7646903 | 0.00016676 | 0.00369404 |
| Fam64a      | 2366.86261 | -1.491455  | 0.28277141 | -5.2744195 | 1.33E-07   | 9.90E-06   |
| Gm4975      | 640.426708 | -1.5039949 | 0.40026515 | -3.7574965 | 0.00017162 | 0.0037803  |
| Dpys        | 1462.71762 | -1.5040347 | 0.35037373 | -4.2926584 | 1.77E-05   | 0.00059814 |
| Tmprss13    | 24.5125342 | -1.5044315 | 0.4302291  | -3.4968148 | NA         | NA         |
| Ap3b2       | 1618.84586 | -1.5130506 | 0.37493385 | -4.0355135 | 5.45E-05   | 0.00148904 |

|          |            |            |            |            |            |            |
|----------|------------|------------|------------|------------|------------|------------|
| Mettl22  | 507.623791 | -1.5139102 | 0.24298837 | -6.2303812 | 4.65E-10   | 6.64E-08   |
| Selenbp1 | 158.973202 | -1.5268086 | 0.34313215 | -4.4496227 | 8.60E-06   | 0.00033277 |
| Lhfpl4   | 26.9968132 | -1.5289051 | 0.41992208 | -3.6409258 | 0.00027166 | 0.00539537 |
| Atp10a   | 203.294378 | -1.5306336 | 0.35578107 | -4.3021782 | 1.69E-05   | 0.00057678 |
| Pycr1    | 1605.57107 | -1.5353275 | 0.2291457  | -6.700224  | 2.08E-11   | 3.76E-09   |
| Usp29    | 415.701657 | -1.5397814 | 0.35500594 | -4.3373399 | 1.44E-05   | 0.00050644 |
| Nfe2l3   | 375.20372  | -1.5640932 | 0.31731929 | -4.9290833 | 8.26E-07   | 4.74E-05   |
| Trib2    | 166.673069 | -1.572299  | 0.31570436 | -4.9802892 | 6.35E-07   | 3.77E-05   |
| Gstm3    | 596.29711  | -1.5747164 | 0.33464102 | -4.7056887 | 2.53E-06   | 0.00012219 |
| T2       | 61.2057512 | -1.576015  | 0.4319062  | -3.6489751 | NA         | NA         |
| Gnb4     | 1073.36865 | -1.5807239 | 0.20940688 | -7.5485768 | 4.40E-14   | 1.56E-11   |
| Klf6     | 2438.41267 | -1.5844499 | 0.23170132 | -6.8383292 | 8.01E-12   | 1.64E-09   |
| Cntd1    | 342.359763 | -1.5876685 | 0.33898447 | -4.6836023 | 2.82E-06   | 0.00013243 |
| Aldh1b1  | 382.147195 | -1.5896929 | 0.29301249 | -5.4253417 | 5.78E-08   | 4.78E-06   |
| Alox12e  | 44.6495456 | -1.6029527 | 0.42339603 | -3.7859418 | 0.00015313 | 0.0034671  |
| Myb      | 393.065004 | -1.611212  | 0.39709607 | -4.0574866 | 4.96E-05   | 0.00138602 |
| Trim60   | 30.7248162 | -1.6169599 | 0.4261253  | -3.7945645 | 0.0001479  | 0.00339238 |
| Fam169b  | 656.862886 | -1.6217005 | 0.39190467 | -4.1379974 | NA         | NA         |
| Apela    | 4191.03871 | -1.6266109 | 0.35034446 | -4.6428901 | 3.44E-06   | 0.00015622 |
| Plk5     | 200.904609 | -1.629051  | 0.29803542 | -5.4659645 | 4.60E-08   | 3.94E-06   |
| Eci3     | 87.1561568 | -1.6318091 | 0.35631646 | -4.5796624 | 4.66E-06   | 0.00019843 |
| Sptbn2   | 1790.55836 | -1.6340538 | 0.2818958  | -5.7966588 | 6.76E-09   | 7.06E-07   |
| Creg2    | 80.9928184 | -1.6392619 | 0.41724886 | -3.9287391 | NA         | NA         |
| Cpne5    | 926.918651 | -1.6448636 | 0.20666232 | -7.9591846 | 1.73E-15   | 8.69E-13   |
| Lrrc8e   | 62.7605032 | -1.6554963 | 0.42524299 | -3.8930595 | 9.90E-05   | 0.0024285  |
| Calca    | 236.296296 | -1.6558532 | 0.33228774 | -4.9831907 | 6.25E-07   | 3.74E-05   |
| Matn3    | 89.5820311 | -1.6798581 | 0.29817719 | -5.6337579 | 1.76E-08   | 1.71E-06   |
| Anxa8    | 293.439563 | -1.6823468 | 0.30021057 | -5.6038891 | 2.10E-08   | 1.99E-06   |
| Rnf207   | 169.315153 | -1.6881374 | 0.35205684 | -4.7950705 | 1.63E-06   | 8.40E-05   |
| Clmn     | 924.892263 | -1.6908313 | 0.24220533 | -6.9809831 | 2.93E-12   | 6.70E-10   |
| Dmtn     | 4782.4693  | -1.7158944 | 0.18050181 | -9.5062446 | 1.98E-21   | 2.56E-18   |
| Chrnd    | 87.3987419 | -1.7163612 | 0.36026802 | -4.7641232 | 1.90E-06   | 9.39E-05   |
| Ccnd1    | 6292.13542 | -1.7255525 | 0.25345661 | -6.8080785 | 9.89E-12   | 1.94E-09   |
| Atp10d   | 1517.54837 | -1.7274216 | 0.38247922 | -4.5163803 | 6.29E-06   | 0.00025475 |
| Cald1    | 6115.36184 | -1.7417694 | 0.23583997 | -7.3853868 | 1.52E-13   | 4.55E-11   |
| Pglyrp1  | 640.771803 | -1.7421368 | 0.34553497 | -5.0418537 | 4.61E-07   | 2.88E-05   |
| Cbr3     | 1386.60232 | -1.7504469 | 0.251418   | -6.9622976 | 3.35E-12   | 7.54E-10   |
| Pou2f3   | 1498.17964 | -1.7757016 | 0.30412207 | -5.8387791 | 5.26E-09   | 5.68E-07   |
| Enpp3    | 413.056474 | -1.7895009 | 0.38075397 | -4.6998878 | 2.60E-06   | 0.00012494 |
| Sgpp2    | 97.9435735 | -1.833062  | 0.39571688 | -4.6322564 | 3.62E-06   | 0.0001621  |
| Nuggc    | 140.297039 | -1.8401055 | 0.43129603 | -4.2664558 | NA         | NA         |

|          |            |            |            |            |          |            |
|----------|------------|------------|------------|------------|----------|------------|
| Gm9112   | 59.4943092 | -1.8490517 | 0.41993578 | -4.4031773 | 1.07E-05 | 0.00039218 |
| Mvb12b   | 627.849302 | -1.8566029 | 0.32487912 | -5.7147499 | 1.10E-08 | 1.10E-06   |
| Pof1b    | 788.36262  | -1.8575807 | 0.38920987 | -4.7726967 | 1.82E-06 | 9.15E-05   |
| Id4      | 685.606564 | -1.8629601 | 0.24570435 | -7.5821212 | 3.40E-14 | 1.26E-11   |
| Lrtm2    | 49.660143  | -1.8648679 | 0.42242319 | -4.4146911 | 1.01E-05 | 0.00037905 |
| Neil3    | 484.587338 | -1.8687101 | 0.27754747 | -6.7329386 | 1.66E-11 | 3.12E-09   |
| Gm5091   | 31.4800902 | -1.8864299 | 0.43191989 | -4.3675458 | 1.26E-05 | 0.00045548 |
| Dmrtc2   | 145.141066 | -1.9005633 | 0.31593928 | -6.0155967 | 1.79E-09 | 2.28E-07   |
| Slco4a1  | 394.168608 | -1.9379759 | 0.27987569 | -6.9244168 | 4.38E-12 | 9.59E-10   |
| Gm6682   | 247.0041   | -1.9517848 | 0.42411237 | -4.6020465 | 4.18E-06 | 0.00018378 |
| Vax2os   | 720.691961 | -1.9750264 | 0.31416445 | -6.2866004 | 3.24E-10 | 4.81E-08   |
| Hhip     | 190.163207 | -1.9816116 | 0.3305646  | -5.9946273 | 2.04E-09 | 2.52E-07   |
| Nwd1     | 65.466098  | -1.9920876 | 0.41127182 | -4.843725  | 1.27E-06 | 6.83E-05   |
| Slc12a8  | 812.03706  | -1.9982578 | 0.24008224 | -8.3232219 | 8.56E-17 | 6.34E-14   |
| Hsh2d    | 210.095645 | -2.0175148 | 0.28715463 | -7.0258831 | 2.13E-12 | 5.16E-10   |
| Ccdc68   | 325.12584  | -2.051163  | 0.38989808 | -5.260767  | 1.43E-07 | 1.04E-05   |
| Dmrtc1b  | 48.5925577 | -2.0548084 | 0.40012796 | -5.1353782 | 2.82E-07 | 1.85E-05   |
| Ramp2    | 146.885076 | -2.0606029 | 0.34921866 | -5.9006095 | 3.62E-09 | 4.10E-07   |
| Atp6v0a4 | 633.07703  | -2.0624982 | 0.36435534 | -5.6606778 | 1.51E-08 | 1.49E-06   |
| Hmha1    | 1120.54028 | -2.0941209 | 0.25370792 | -8.254062  | 1.53E-16 | 1.04E-13   |
| Ndrg2    | 714.608207 | -2.1071731 | 0.27173788 | -7.7544326 | 8.87E-15 | 3.63E-12   |
| A2m      | 5756.41123 | -2.2312132 | 0.38325619 | -5.8217276 | 5.82E-09 | 6.20E-07   |
| Pxt1     | 54.240384  | -2.2408355 | 0.36768008 | -6.0945251 | 1.10E-09 | 1.47E-07   |
| Bst2     | 2532.15262 | -2.3564923 | 0.28215526 | -8.3517574 | 6.73E-17 | 5.23E-14   |
| Igfbp5   | 258.594209 | -2.4226944 | 0.336654   | -7.1963927 | 6.18E-13 | 1.70E-10   |
| Ccbe1    | 276.620954 | -2.4803241 | 0.37430393 | -6.6264974 | 3.44E-11 | 6.01E-09   |
| Nlrp3    | 113.84107  | -2.5435171 | 0.39912879 | -6.3726727 | 1.86E-10 | 2.86E-08   |
| Ccnd3    | 7373.98543 | -2.5971681 | 0.31682903 | -8.1973803 | 2.46E-16 | 1.53E-13   |
| Obox6    | 2313.95719 | -2.9583125 | 0.3753284  | -7.8819308 | 3.22E-15 | 1.52E-12   |
| Gm19784  | 30.5544806 | -3.0564313 | 0.42886329 | -7.1268195 | 1.03E-12 | 2.62E-10   |





**Supplementary Table 3: Comparisons of transcript abundance between Ctrl and Q-KO ES cells.**

| id          | baseMean   | log2 fold char | lfcSE      | stat       | p-value  | p-adj    |
|-------------|------------|----------------|------------|------------|----------|----------|
| Rhox13      | 1051.60585 | 4.09230298     | 0.27305684 | 14.9870002 | 8.93E-51 | 1.39E-46 |
| Akr1cl      | 1103.11351 | 3.68685325     | 0.36083072 | 10.2176812 | 1.65E-24 | 4.28E-21 |
| Rhox2h      | 103.628217 | 3.35537608     | 0.34866919 | 9.62337982 | 6.37E-22 | 9.91E-19 |
| Igfbp7      | 881.546459 | 3.20320114     | 0.3388073  | 9.45434522 | 3.25E-21 | 3.63E-18 |
| Slc13a5     | 2628.7357  | 3.14898428     | 0.29399032 | 10.7111835 | 9.02E-27 | 2.81E-23 |
| Afm         | 43.6074011 | 3.14303641     | 0.42157241 | 7.45550793 | 8.95E-14 | 2.96E-11 |
| Rin3        | 314.741815 | 2.92585934     | 0.31652124 | 9.24380097 | 2.38E-20 | 2.31E-17 |
| Atp12a      | 562.778586 | 2.90984535     | 0.29872755 | 9.74080017 | 2.02E-22 | 3.49E-19 |
| Asz1        | 712.305439 | 2.90328821     | 0.3737786  | 7.7674009  | 8.01E-15 | 3.37E-12 |
| Dppa1       | 61.4603294 | 2.88065634     | 0.42967763 | 6.70422693 | 2.02E-11 | 3.70E-09 |
| BC053393    | 282.650086 | 2.78470661     | 0.37702789 | 7.3859432  | 1.51E-13 | 4.55E-11 |
| Nell2       | 160.548233 | 2.77174097     | 0.38520434 | 7.19550823 | 6.22E-13 | 1.70E-10 |
| Cd74        | 436.252265 | 2.74526242     | 0.37035132 | 7.41258985 | 1.24E-13 | 3.93E-11 |
| Nap1l5      | 291.609812 | 2.73421477     | 0.27549526 | 9.92472539 | 3.25E-23 | 6.32E-20 |
| Crispld2    | 226.167751 | 2.69342409     | 0.33953671 | 7.93264468 | 2.15E-15 | 1.04E-12 |
| Otor        | 28.2785011 | 2.68141999     | 0.42911292 | 6.2487515  | 4.14E-10 | 6.01E-08 |
| AU022751    | 647.790422 | 2.67967947     | 0.37173328 | 7.20860792 | 5.65E-13 | 1.60E-10 |
| Rhox6       | 447.123946 | 2.63227342     | 0.37965617 | 6.93330859 | 4.11E-12 | 9.13E-10 |
| Lmod3       | 90.3306843 | 2.61638342     | 0.38239611 | 6.84207648 | 7.81E-12 | 1.62E-09 |
| Gm9         | 542.711861 | 2.59571189     | 0.29158509 | 8.90207343 | 5.48E-19 | 5.01E-16 |
| Gpnmb       | 1462.527   | 2.58030471     | 0.31215194 | 8.26618183 | 1.38E-16 | 9.78E-14 |
| Derl3       | 418.925972 | 2.56210295     | 0.23393794 | 10.9520626 | 6.50E-28 | 2.53E-24 |
| Gsto1       | 14423.8207 | 2.54521949     | 0.31395671 | 8.10691231 | 5.19E-16 | 2.99E-13 |
| Lrrc4       | 102.225832 | 2.53948248     | 0.35336528 | 7.18656476 | 6.64E-13 | 1.78E-10 |
| Cdx2        | 47.0771812 | 2.53806029     | 0.40789369 | 6.22235729 | 4.90E-10 | 6.80E-08 |
| Adcy2       | 333.539747 | 2.53098207     | 0.32168886 | 7.8677953  | 3.61E-15 | 1.65E-12 |
| H2bfm       | 121.809433 | 2.51010056     | 0.33364218 | 7.52333106 | 5.34E-14 | 1.85E-11 |
| Rec8        | 8003.94667 | 2.47868208     | 0.24933974 | 9.94098279 | 2.76E-23 | 6.13E-20 |
| Pik3r3      | 6466.42183 | 2.46600561     | 0.2016161  | 12.2311941 | 2.12E-34 | 1.65E-30 |
| Akr1c18     | 51.7511722 | 2.43181775     | 0.37525532 | 6.48043511 | 9.15E-11 | 1.50E-08 |
| Sez6l       | 218.545766 | 2.41413729     | 0.27848038 | 8.6689673  | 4.36E-18 | 3.77E-15 |
| AI118078    | 279.651828 | 2.40715755     | 0.30922827 | 7.7844032  | 7.00E-15 | 3.11E-12 |
| Tacstd2     | 27.1333578 | 2.39778417     | 0.42995583 | 5.57681516 | 2.45E-08 | 2.27E-06 |
| Cpne8       | 172.410098 | 2.33587661     | 0.39103843 | 5.97352181 | 2.32E-09 | 2.82E-07 |
| Tbx2        | 308.383466 | 2.31284206     | 0.3431984  | 6.73908164 | 1.59E-11 | 3.02E-09 |
| 2200002D01f | 297.566729 | 2.3127064      | 0.30814918 | 7.50515195 | 6.14E-14 | 2.07E-11 |
| Fam198b     | 3964.81624 | 2.30067777     | 0.28751677 | 8.00189079 | 1.23E-15 | 6.57E-13 |
| Gm1564      | 5943.91432 | 2.28530579     | 0.24173618 | 9.45371859 | 3.27E-21 | 3.63E-18 |
| Wls         | 1979.18121 | 2.25992156     | 0.31836313 | 7.09856557 | 1.26E-12 | 3.11E-10 |

|             |                   |                   |                   |                  |           |            |
|-------------|-------------------|-------------------|-------------------|------------------|-----------|------------|
| Kcnh1       | 118.240821        | 2.25017695        | 0.36644982        | 6.14047762       | 8.23E-10  | 1.12E-07   |
| Rhox2d      | 62.7943794        | 2.24446919        | 0.41007602        | 5.4733003        | 4.42E-08  | 3.84E-06   |
| Slc26a9     | 108.239165        | 2.21408205        | 0.4090818         | 5.41232113       | 6.22E-08  | 5.12E-06   |
| Luzp4       | 119.694545        | 2.19669262        | 0.31955562        | 6.87421054       | 6.23E-12  | 1.33E-09   |
| Rhox2g      | 50.2852088        | 2.18485832        | 0.42128236        | 5.18620893       | 2.15E-07  | 1.48E-05   |
| Ffar3       | 332.218329        | 2.15902602        | 0.29025428        | 7.43839521       | 1.02E-13  | 3.30E-11   |
| Pmaip1      | 3764.28861        | 2.15679488        | 0.30245211        | 7.13102926       | 9.96E-13  | 2.58E-10   |
| Lcp1        | 1525.47099        | 2.14706596        | 0.32499747        | 6.60640827       | 3.94E-11  | 6.73E-09   |
| <i>Prg4</i> | <i>52.4293478</i> | <i>2.14051512</i> | <i>0.43216623</i> | <i>4.9529902</i> | <i>NA</i> | <i>NA</i>  |
| Cyp11a1     | 57.3162529        | 2.13126033        | 0.3533505         | 6.03157574       | 1.62E-09  | 2.10E-07   |
| Cd34        | 154.329039        | 2.1311845         | 0.3394539         | 6.27827367       | 3.42E-10  | 5.02E-08   |
| Hoxb9       | 476.128646        | 2.12078927        | 0.26135616        | 8.11455629       | 4.88E-16  | 2.92E-13   |
| Sh3d21      | 611.433317        | 2.11564699        | 0.28863212        | 7.32990843       | 2.30E-13  | 6.76E-11   |
| C1qtnf9     | 38.6512382        | 2.08494277        | 0.40144231        | 5.19362983       | 2.06E-07  | 1.43E-05   |
| Mrc2        | 216.164522        | 2.08100502        | 0.3868049         | 5.3799862        | 7.45E-08  | 5.94E-06   |
| Mrc1        | 73.9029463        | 2.06140162        | 0.38566186        | 5.34510112       | 9.04E-08  | 7.00E-06   |
| Eomes       | 1009.32322        | 2.05584763        | 0.1822252         | 11.2819064       | 1.61E-29  | 8.36E-26   |
| Muc1        | 331.515239        | 2.05356452        | 0.21799407        | 9.42027691       | 4.50E-21  | 4.66E-18   |
| Gm16063     | 65.0354141        | 2.04916207        | 0.34796067        | 5.88906227       | 3.88E-09  | 4.35E-07   |
| Loxl4       | 208.912258        | 2.04770093        | 0.37584059        | 5.448323         | 5.08E-08  | 4.32E-06   |
| Rhox1       | 803.957581        | 2.03718097        | 0.25509049        | 7.98611102       | 1.39E-15  | 7.22E-13   |
| Rhox2b      | 82.0412765        | 2.02717931        | 0.39443105        | 5.13950242       | 2.75E-07  | 1.83E-05   |
| Rhox9       | 438.190286        | 2.02469142        | 0.41174395        | 4.91735557       | 8.77E-07  | 5.02E-05   |
| Eras        | 426.233089        | 2.02348669        | 0.26659574        | 7.59009381       | 3.20E-14  | 1.24E-11   |
| Parvg       | 122.767446        | 2.02095216        | 0.37655141        | 5.36700194       | 8.01E-08  | 6.32E-06   |
| Adam11      | 1265.73398        | 2.00793539        | 0.23643713        | 8.49247054       | 2.02E-17  | 1.66E-14   |
| Zcchc12     | 53.2861587        | 2.00779308        | 0.38797616        | 5.17504246       | 2.28E-07  | 1.55E-05   |
| Gm12169     | 125.917634        | 2.0032383         | 0.42911118        | 4.66834329       | 3.04E-06  | 0.00014012 |

trophectoder Refs

- YES Rawn and Cross, Annu Rev Cell Dev Biol 2008, 24, 159-81; MacLean et al., Cell 2005, 120,
- YES MacLean et al., Cell 2005, 120, 369-82.
- YES Marchand et al., Biol Reprod 2011, 84, 1258-71.
- YES Marchand et al., Biol Reprod 2011, 84, 1258-71; Guo et al., Dev Cell 2010, 18, 675-85; Iqb
- YES Guo et al., Dev Cell 2010, 18, 675-85; Sharifi-Zarchi et al., BMC Systems Biology 2015, 9:2:
- YES MacLean et al., Cell 2005, 120, 369-82; Chun et al., Dev Dyn 1999, 216, 257-66; Oda et al.
- YES Ralston et al., Development 2010, 137, 395-403.
- YES Kualet et al., Stem Cells Int 2015, 2015, 218518.
- YES Ralston et al., Development 2010, 137, 395-403.
- YES Guo et al., Dev Cell 2010, 18, 675-85; Sharifi-Zarchi et al., BMC Systems Biology 2015, 9:2:
- YES Ralston et al., Development 2010, 137, 395-403; Assou et al., PLOS One 2012, 7, e39306.
- YES Ralston et al., Development 2010, 137, 395-403.
- YES Ralston et al., Development 2010, 137, 395-403.

YES MacLean et al., Cell 2005, 120, 369-82; Oda et al., PLOS One 2013, 8, e68846.

YES MacLean et al., Cell 2005, 120, 369-82; Oda et al., PLOS One 2013, 8, e68846.

YES Guo et al., Dev Cell 2010, 18, 675-85; Ralston et al., Development 2010, 137, 395-403; Shi

YES Marchand et al., Biol Reprod 2011, 84, 1258-71; Hosseini et al., BMC Dev Biol 2015, 15:4

YES Guo et al., Dev Cell 2010, 18, 675-85; Ralston et al., Development 2010, 137, 395-403; Shi

YES Meseguer et al., Biol Reprod 2001, 64, 590-601; Thirkill et al., Biochim Biophys Acta 2007,

YES Marchand et al., Biol Reprod 2011, 84, 1258-71.

YES MacLean et al., Cell 2005, 120, 369-82.

YES MacLean et al., Cell 2005, 120, 369-82.

YES MacLean et al., Cell 2005, 120, 369-82; Oda et al., Genes Dev 2006, 20, 3382-94.

369-82.

al et al., Biol Reprod 2014, 90, 1-9; Sharifi-Zarchi et al., BMC Systems Biology 2015, 9:23.

3.

, Genes Dev 2006, 20, 3382-94; Oda et al., PLOS One 2013, 8, e68846.

3.

arifi-Zarchi et al., BMC Systems Biology 2015, 9:23; Kuales et al., Stem Cells Int 2015, 2015, 21851

9.

arifi-Zarchi et al., BMC Systems Biology 2015, 9:23  
, 1773, 1007-14.





8.

**Supplementary Table 3: Comparisons of transcript abundance between Ctrl and Q-KO ES cells.**

| id       | baseMean   | log2 fold char | lfcSE      | stat       | p-value  | p-adj    |
|----------|------------|----------------|------------|------------|----------|----------|
| Hsh2d    | 210.095645 | -2.0175148     | 0.28715463 | -7.0258831 | 2.13E-12 | 5.16E-10 |
| Ccdc68   | 325.12584  | -2.051163      | 0.38989808 | -5.260767  | 1.43E-07 | 1.04E-05 |
| Dmrtc1b  | 48.5925577 | -2.0548084     | 0.40012796 | -5.1353782 | 2.82E-07 | 1.85E-05 |
| Ramp2    | 146.885076 | -2.0606029     | 0.34921866 | -5.9006095 | 3.62E-09 | 4.10E-07 |
| Atp6v0a4 | 633.07703  | -2.0624982     | 0.36435534 | -5.6606778 | 1.51E-08 | 1.49E-06 |
| Hmha1    | 1120.54028 | -2.0941209     | 0.25370792 | -8.254062  | 1.53E-16 | 1.04E-13 |
| Ndrp2    | 714.608207 | -2.1071731     | 0.27173788 | -7.7544326 | 8.87E-15 | 3.63E-12 |
| A2m      | 5756.41123 | -2.2312132     | 0.38325619 | -5.8217276 | 5.82E-09 | 6.20E-07 |
| Pxt1     | 54.240384  | -2.2408355     | 0.36768008 | -6.0945251 | 1.10E-09 | 1.47E-07 |
| Bst2     | 2532.15262 | -2.3564923     | 0.28215526 | -8.3517574 | 6.73E-17 | 5.23E-14 |
| Igfbp5   | 258.594209 | -2.4226944     | 0.336654   | -7.1963927 | 6.18E-13 | 1.70E-10 |
| Ccbe1    | 276.620954 | -2.4803241     | 0.37430393 | -6.6264974 | 3.44E-11 | 6.01E-09 |
| Nlrp3    | 113.84107  | -2.5435171     | 0.39912879 | -6.3726727 | 1.86E-10 | 2.86E-08 |
| Ccnd3    | 7373.98543 | -2.5971681     | 0.31682903 | -8.1973803 | 2.46E-16 | 1.53E-13 |
| Obox6    | 2313.95719 | -2.9583125     | 0.3753284  | -7.8819308 | 3.22E-15 | 1.52E-12 |
| Gm19784  | 30.5544806 | -3.0564313     | 0.42886329 | -7.1268195 | 1.03E-12 | 2.62E-10 |



## Supplementary Table 4: Mapping of cyclin E-CDK2-dependent phosphosites on N

### Phosphorylation analysis of Nanog using LC-MS/MS

| ScanF | z | XCorr | Delta Corr | # Ions | Mat Total Ions | Reference Peptide   |
|-------|---|-------|------------|--------|----------------|---------------------|
| 20939 | 3 | 3.736 | 0.027      | 24     | 92             | sp Q80Z64.E.AAS#PRP |
| 11824 | 3 | 3.719 | 0.044      | 28     | 92             | sp Q80Z64.E.AAS#PRP |
| 20401 | 3 | 4.813 | 0.012      | 27     | 92             | sp Q80Z64.E.AAS#PRP |
| 19796 | 3 | 4.33  | 0.003      | 27     | 92             | sp Q80Z64.E.AAS#PRP |
| 22265 | 3 | 3.659 | 0.005      | 26     | 92             | sp Q80Z64.E.AASPRPS |
| 11050 | 2 | 1.894 | 0.062      | 17     | 28             | sp Q80Z64.E.DLPLQGS |
| 17277 | 2 | 1.894 | 0.114      | 17     | 28             | sp Q80Z64.E.DLPLQGS |
| 20939 | 3 | 3.736 | 0.027      | 24     | 92             | sp Q80Z64.E.AAS#PRP |
| 19796 | 3 | 4.33  | 0.003      | 27     | 92             | sp Q80Z64.E.AAS#PRP |
| 20401 | 3 | 4.813 | 0.012      | 27     | 92             | sp Q80Z64.E.AAS#PRP |
| 11824 | 3 | 3.719 | 0.044      | 28     | 92             | sp Q80Z64.E.AAS#PRP |
| 22265 | 3 | 3.659 | 0.005      | 26     | 92             | sp Q80Z64.E.AASPRPS |
| 29533 | 2 | 1.826 | 0.621      | 14     | 28             | sp Q80Z64.E.DLPLQGS |
| 29178 | 3 | 1.562 | 0.004      | 20     | 88             | sp Q80Z64.E.DLPLQGS |
| 29750 | 3 | 1.515 | 0.004      | 23     | 88             | sp Q80Z64.E.DLPLQGS |
| 11050 | 2 | 1.894 | 0.062      | 17     | 28             | sp Q80Z64.E.DLPLQGS |
| 26548 | 3 | 1.396 | 0.047      | 21     | 88             | sp Q80Z64.E.DLPLQGS |
| 17277 | 2 | 1.894 | 0.114      | 17     | 28             | sp Q80Z64.E.DLPLQGS |
| 10475 | 2 | 2.365 | 0.018      | 15     | 22             | sp Q80Z64.E.SHAHFS# |
| 7087  | 2 | 2.156 | 0.037      | 18     | 22             | sp Q80Z64.E.SHAHFST |

Vanog, Oct4 and Sox2.

| ModScore Peptide              | Max Score | Site 1 Posi | Site 1 Prot | Site 1 Scor | Site 2 Posi |
|-------------------------------|-----------|-------------|-------------|-------------|-------------|
| E.AAS#PRPSSDLPLQGSPDSST#SPK.Q | 103.919   | 3           | 52          | 25.174      | 21          |
| E.AAS#PRPSSDLPLQGSPDSSTSPK.Q  | 96.591    | 3           | 52          | 23.624      | 0           |
| E.AAS#PRPSSDLPLQGSPDS#STSPK.Q | 91.337    | 3           | 52          | 19.846      | 19          |
| E.AAS#PRPSSDLPLQGSPDSS#TSPK.Q | 120.317   | 3           | 52          | 16.062      | 20          |
| E.AAS#PRPSSDLPLQGSPDSS#TSPK.Q | 70.174    | 3           | 52          | 16.062      | 20          |
| E.DLPLQGS#PDSSTSPK.Q          | 130.006   | 7           | 65          | 13.38       | 0           |
| E.DLPLQGSPDSSTS#PK.Q          | 107.026   | 13          | 71          | 17.009      | 0           |
| E.AAS#PRPSSDLPLQGSPDSST#SPK.Q | 103.919   | 3           | 52          | 25.174      | 21          |
| E.AAS#PRPSSDLPLQGSPDSS#TSPK.Q | 120.317   | 3           | 52          | 16.062      | 20          |
| E.AAS#PRPSSDLPLQGSPDS#STSPK.Q | 91.337    | 3           | 52          | 19.846      | 19          |
| E.AAS#PRPSSDLPLQGSPDSSTSPK.Q  | 96.591    | 3           | 52          | 23.624      | 0           |
| E.AAS#PRPSSDLPLQGSPDSS#TSPK.Q | 70.174    | 3           | 52          | 16.062      | 20          |
| E.DLPLQGS#P.D                 | 94.662    | 7           | 65          | 1000        | 0           |
| E.DLPLQGS#PDSSTS#PKQKLSSPEA.D | 112.582   | 7           | 65          | 15.007      | 13          |
| E.DLPLQGS#PDSSTS#PKQKLSSPEA.D | 112.582   | 7           | 65          | 15.007      | 13          |
| E.DLPLQGS#PDSSTSPK.Q          | 130.006   | 7           | 65          | 13.38       | 0           |
| E.DLPLQGS#PDSSTSPKQKLSSPEA.D  | 61.361    | 7           | 65          | 23.624      | 0           |
| E.DLPLQGSPDSSTS#PK.Q          | 107.026   | 13          | 71          | 17.009      | 0           |
| E.SHAHFST#PQALE.L             | 97.565    | 7           | 287         | 16.073      | 0           |
| E.SHAHFST#PQALE.L             | 119.747   | 7           | 287         | 15.012      | 0           |

**Site 2 Prot Site 2 Score**

|    |        |
|----|--------|
|    | 7.71   |
|    | 0      |
|    | 0      |
|    | 0      |
|    | 0      |
|    | 0      |
|    | 0      |
|    | 7.71   |
|    | 0      |
|    | 0      |
|    | 0      |
|    | 0      |
|    | 0      |
| 71 | 18.805 |
| 71 | 1.197  |
|    | 0      |
|    | 0      |
|    | 0      |
|    | 0      |
|    | 0      |

## Supplementary Table 4: Mapping of cyclin E-CDK2-dependent phosphosites

### Phosphorylation analysis of Sox2 using LC-MS/MS

| ScanF | z | XCorr | Delta Corr | # Ions Mat | Total Ions |
|-------|---|-------|------------|------------|------------|
| 10547 | 2 | 3.188 | 0.194      | 14         | 34         |
| 10565 | 2 | 2.945 | 0.062      | 20         | 34         |
| 6705  | 4 | 2.442 | 0.184      | 30         | 234        |
| 7731  | 4 | 3.384 | 0.041      | 33         | 234        |
| 7747  | 4 | 3.192 | 0.105      | 32         | 234        |
| 48392 | 4 | 1.24  | 0.098      | 21         | 150        |
| 2264  | 3 | 2.636 | 0.038      | 26         | 64         |

## on Nanog, Oct4 and Sox2.

| Reference            | Peptide                          | ModScore   | Max Score |
|----------------------|----------------------------------|------------|-----------|
| sp P48432 SOX2_MOUSE | Y.SQQGT#PGM*ALGSM*GSVVK.S        | Y.SQQGT#I  | 68.171    |
| sp P48432 SOX2_MOUSE | Y.SQQGT#PGM*ALGSM*GSVVK.S        | Y.SQQGT#I  | 122.344   |
| sp P48432 SOX2_MOUSE | Y.NM*M*ETELKPPGPQQASGGGGGGGNATAA | Y.NM*M*I   | 17.463    |
| sp P48432 SOX2_MOUSE | Y.NM*M*ETELKPPGPQQASGGGGGGGNATAA | Y.NM*M*I   | 15.031    |
| sp P48432 SOX2_MOUSE | Y.NM*M*ETELKPPGPQQASGGGGGGGNATAA | Y.NM*M*I   | 20.075    |
| sp P48432 SOX2_MOUSE | K.S#EASSSPPVVTSSSHSRAPCQAGDLR.D  | K.SEASSS#I | 7.948     |
| sp P48432 SOX2_MOUSE | K.SEASSS#PPVVTSSSHSR.A           | K.SEASSS#I | 70.334    |



**Site 1 Posi Site 1 Prot Site 1 Score**

|    |     |        |
|----|-----|--------|
| 5  | 235 | 30.07  |
| 5  | 235 | 24.243 |
| 37 | 39  | 17.009 |
| 37 | 39  | 15.381 |
| 37 | 39  | 2.366  |
| 6  | 253 | 22.329 |
| 6  | 253 | 6.591  |

## Supplementary Table 4: Mapping of cyclin E-CDK2-dependent phosphosites on Nanog, Oct4 and Sox

### Phosphorylation analysis of Sox2 using LC-MS/MS

| ScanF | z | XCorr | Delta | Corr | # Ions | Peptide | Reference Peptide           | ModScore |
|-------|---|-------|-------|------|--------|---------|-----------------------------|----------|
| 2308  | 2 | 1.876 | 0.115 |      | 13     | 32 P1   | sp P48432 K.SQTYM* K.SQTYM* |          |
| 2312  | 2 | 2.46  | 0.065 |      | 16     | 32 P1   | sp P48432 K.SQTYM* K.SQTYM* |          |
| 2317  | 2 | 2.355 | 0.134 |      | 14     | 32 P1   | sp P48432 K.SQTYM* K.SQTYM* |          |
| 2318  | 3 | 1.915 | 0.118 |      | 21     | 64 P1   | sp P48432 K.SQTYM* K.SQTYM* |          |
| 2320  | 2 | 2.013 | 0.13  |      | 16     | 32 P1   | sp P48432 K.SQTYM* K.SQTYM* |          |
| 2323  | 2 | 2.815 | 0.099 |      | 17     | 32 P1   | sp P48432 K.SQTYM* K.SQTYM* |          |
| 2326  | 2 | 2.856 | 0.102 |      | 18     | 32 P1   | sp P48432 K.SQTYM* K.SQTYM* |          |
| 2327  | 3 | 2.656 | 0.187 |      | 20     | 64 P1   | sp P48432 K.SQTYM* K.SQTYM* |          |
| 2329  | 2 | 3.062 | 0.057 |      | 17     | 32 P1   | sp P48432 K.SQTYM* K.SQTYM* |          |
| 2333  | 3 | 2.422 | 0.183 |      | 24     | 64 P1   | sp P48432 K.SQTYM* K.SQTYM* |          |
| 2336  | 3 | 3.149 | 0.193 |      | 25     | 64 P1   | sp P48432 K.SQTYM* K.SQTYM* |          |
| 2339  | 3 | 2.827 | 0.197 |      | 26     | 64 P1   | sp P48432 K.SQTYM* K.SQTYM* |          |
| 2341  | 2 | 3.172 | 0.072 |      | 18     | 32 P1   | sp P48432 K.SQTYM* K.SQTYM* |          |
| 2344  | 2 | 2.707 | 0.074 |      | 15     | 32 P1   | sp P48432 K.SQTYM* K.SQTYM* |          |
| 2346  | 2 | 3.014 | 0.021 |      | 18     | 32 P1   | sp P48432 K.SQTYM* K.SQTYM* |          |
| 2347  | 3 | 2.537 | 0.231 |      | 21     | 64 P1   | sp P48432 K.SQTYM* K.SQTYM* |          |
| 2349  | 2 | 2.923 | 0.045 |      | 17     | 32 P1   | sp P48432 K.SQTYM* K.SQTYM* |          |
| 2352  | 2 | 3.026 | 0.046 |      | 17     | 32 P1   | sp P48432 K.SQTYM* K.SQTYM* |          |
| 2354  | 2 | 2.909 | 0.054 |      | 16     | 32 P1   | sp P48432 K.SQTYM* K.SQTYM* |          |
| 2356  | 2 | 3.261 | 0.049 |      | 20     | 32 P1   | sp P48432 K.SQTYM* K.SQTYM* |          |
| 2357  | 3 | 3.304 | 0.178 |      | 30     | 64 P1   | sp P48432 K.SQTYM* K.SQTYM* |          |
| 2359  | 2 | 3.181 | 0.03  |      | 17     | 32 P1   | sp P48432 K.SQTYM* K.SQTYM* |          |
| 2360  | 3 | 2.558 | 0.182 |      | 26     | 64 P1   | sp P48432 K.SQTYM* K.SQTYM* |          |
| 2362  | 2 | 3.045 | 0.067 |      | 19     | 32 P1   | sp P48432 K.SQTYM* K.SQTYM* |          |
| 2363  | 3 | 2.885 | 0.235 |      | 24     | 64 P1   | sp P48432 K.SQTYM* K.SQTYM* |          |
| 2365  | 2 | 2.977 | 0.106 |      | 21     | 32 P1   | sp P48432 K.SQTYM* K.SQTYM* |          |
| 2368  | 2 | 3.094 | 0.048 |      | 20     | 32 P1   | sp P48432 K.SQTYM* K.SQTYM* |          |
| 2369  | 3 | 2.932 | 0.24  |      | 25     | 64 P1   | sp P48432 K.SQTYM* K.SQTYM* |          |
| 2371  | 2 | 3.219 | 0.055 |      | 16     | 32 P1   | sp P48432 K.SQTYM* K.SQTYM* |          |
| 2372  | 3 | 3.345 | 0.114 |      | 28     | 64 P1   | sp P48432 K.SQTYM* K.SQTYM* |          |
| 2374  | 2 | 3.134 | 0.021 |      | 18     | 32 P1   | sp P48432 K.SQTYM* K.SQTYM* |          |
| 2377  | 2 | 2.761 | 0.074 |      | 17     | 32 P1   | sp P48432 K.SQTYM* K.SQTYM* |          |
| 2380  | 2 | 2.845 | 0.032 |      | 19     | 32 P1   | sp P48432 K.SQTYM* K.SQTYM* |          |
| 2382  | 2 | 3.204 | 0.071 |      | 17     | 32 P1   | sp P48432 K.SQTYM* K.SQTYM* |          |
| 2383  | 3 | 2.739 | 0.064 |      | 26     | 64 P1   | sp P48432 K.SQTYM* K.SQTYM* |          |
| 2385  | 2 | 3.285 | 0.082 |      | 16     | 32 P1   | sp P48432 K.SQTYM* K.SQTYM* |          |
| 2386  | 3 | 3.195 | 0.158 |      | 25     | 64 P1   | sp P48432 K.SQTYM* K.SQTYM* |          |
| 2388  | 2 | 2.921 | 0.016 |      | 15     | 32 P1   | sp P48432 K.SQTYM* K.SQTYM* |          |
| 2390  | 2 | 3.25  | 0.046 |      | 15     | 32 P1   | sp P48432 K.SQTYM* K.SQTYM* |          |
| 2391  | 3 | 2.947 | 0.123 |      | 25     | 64 P1   | sp P48432 K.SQTYM* K.SQTYM* |          |
| 2396  | 2 | 2.901 | 0.036 |      | 19     | 32 P1   | sp P48432 K.SQTYM* K.SQTYM* |          |

|      |   |       |       |    |       |                             |
|------|---|-------|-------|----|-------|-----------------------------|
| 2399 | 2 | 2.251 | 0.167 | 13 | 32 P1 | sp P48432 K.SQTYM* K.SQTYM* |
| 2402 | 2 | 2.182 | 0.112 | 14 | 32 P1 | sp P48432 K.SQTYM* K.SQTYM* |
| 2405 | 2 | 2.096 | 0.116 | 14 | 32 P1 | sp P48432 K.SQTYM* K.SQTYM* |
| 2407 | 2 | 2.158 | 0.131 | 15 | 32 P1 | sp P48432 K.SQTYM* K.SQTYM* |
| 2409 | 2 | 2.476 | 0.088 | 17 | 32 P1 | sp P48432 K.SQTYM* K.SQTYM* |
| 2412 | 2 | 1.978 | 0.093 | 15 | 32 P1 | sp P48432 K.SQTYM* K.SQTYM* |
| 2415 | 2 | 1.94  | 0.13  | 14 | 32 P1 | sp P48432 K.SQTYM* K.SQTYM* |
| 2417 | 2 | 1.942 | 0.036 | 14 | 32 P1 | sp P48432 K.SQTYM* K.SQTYM* |
| 2419 | 2 | 2.674 | 0.098 | 15 | 32 P1 | sp P48432 K.SQTYM* K.SQTYM* |
| 2421 | 2 | 1.858 | 0.086 | 15 | 32 P1 | sp P48432 K.SQTYM* K.SQTYM* |
| 2423 | 2 | 2.067 | 0.072 | 13 | 32 P1 | sp P48432 K.SQTYM* K.SQTYM* |
| 2425 | 2 | 1.373 | 0.112 | 11 | 32 P1 | sp P48432 K.SQTYM* K.SQTYM* |
| 2428 | 2 | 1.535 | 0.096 | 12 | 32 P1 | sp P48432 K.SQTYM* K.SQTYM* |
| 2432 | 2 | 1.567 | 0.08  | 12 | 32 P1 | sp P48432 K.SQTYM* K.SQTYM* |
| 2438 | 2 | 1.726 | 0.006 | 10 | 32 P1 | sp P48432 K.SQTYM* K.SQTYM* |
| 2467 | 2 | 2.133 | 0.072 | 10 | 32 P1 | sp P48432 K.SQTYM* K.SQTYM* |
| 2469 | 2 | 1.951 | 0.001 | 10 | 32 P1 | sp P48432 K.SQTYM* K.SQTYM* |
| 2472 | 2 | 2.085 | 0.013 | 16 | 32 P1 | sp P48432 K.SQTYM* K.SQTYM* |
| 2474 | 2 | 2.359 | 0.036 | 14 | 32 P1 | sp P48432 K.SQTYM* K.SQTYM* |
| 2477 | 2 | 2.124 | 0.027 | 13 | 32 P1 | sp P48432 K.SQTYM* K.SQTYM* |
| 2482 | 2 | 1.985 | 0.019 | 12 | 32 P1 | sp P48432 K.SQTYM* K.SQTYM* |
| 2487 | 2 | 2.453 | 0.016 | 15 | 32 P1 | sp P48432 K.SQTYM* K.SQTYM* |
| 2490 | 2 | 3.052 | 0.003 | 20 | 32 P1 | sp P48432 K.SQTYM* K.SQTYM* |
| 2492 | 2 | 2.565 | 0.03  | 15 | 32 P1 | sp P48432 K.SQTYM* K.SQTYM* |
| 2502 | 2 | 2.398 | 0.177 | 18 | 32 P1 | sp P48432 K.SQTYM* K.SQTYM* |
| 2510 | 2 | 1.207 | 0.132 | 11 | 32 P1 | sp P48432 K.SQTYM* K.SQTYM* |
| 2514 | 2 | 1.661 | 0.077 | 12 | 32 P1 | sp P48432 K.SQTYM* K.SQTYM* |
| 2518 | 2 | 1.161 | 0.005 | 12 | 32 P1 | sp P48432 K.SQTYM* K.SQTYM* |
| 2524 | 2 | 1.185 | 0.067 | 10 | 32 P1 | sp P48432 K.SQTYM* K.SQTYM* |
| 2526 | 2 | 1.35  | 0.082 | 11 | 32 P1 | sp P48432 K.SQTYM* K.SQTYM* |
| 2545 | 2 | 1.287 | 0     | 12 | 32 P1 | sp P48432 K.SQT#YM K.SQT#YM |
| 2809 | 2 | 1.67  | 0.03  | 10 | 32 P1 | sp P48432 K.SQTYM* K.SQTYM* |
| 2812 | 2 | 1.679 | 0.171 | 15 | 32 P1 | sp P48432 K.SQTYM* K.SQTYM* |
| 2815 | 2 | 1.134 | 0.079 | 10 | 32 P1 | sp P48432 K.SQTYM* K.SQTYM* |
| 2340 | 3 | 3.372 | 0.129 | 27 | 64 P1 | sp P48432 K.SQTYM* K.SQTYM* |
| 2334 | 3 | 3.286 | 0.191 | 27 | 64 P1 | sp P48432 K.SQTYM* K.SQT#YM |
| 2328 | 3 | 3.277 | 0.169 | 30 | 64 P1 | sp P48432 K.SQTYM* K.SQTYM* |
| 2325 | 3 | 3.259 | 0.169 | 25 | 64 P1 | sp P48432 K.SQTYM* K.SQTYM* |
| 2345 | 2 | 3.22  | 0.037 | 19 | 32 P1 | sp P48432 K.SQTYM* K.SQTYM* |
| 2327 | 2 | 3.205 | 0.048 | 18 | 32 P1 | sp P48432 K.SQTYM* K.SQTYM* |
| 2333 | 2 | 3.151 | 0.041 | 17 | 32 P1 | sp P48432 K.SQTYM* K.SQTYM* |
| 2321 | 2 | 3.145 | 0.062 | 17 | 32 P1 | sp P48432 K.SQTYM* K.SQTYM* |
| 2351 | 2 | 3.14  | 0.047 | 17 | 32 P1 | sp P48432 K.SQTYM* K.SQTYM* |
| 2357 | 2 | 3.136 | 0.081 | 19 | 32 P1 | sp P48432 K.SQTYM* K.SQTYM* |
| 2342 | 2 | 3.087 | 0.032 | 17 | 32 P1 | sp P48432 K.SQTYM* K.SQTYM* |
| 2306 | 2 | 3.076 | 0.052 | 18 | 32 P1 | sp P48432 K.SQTYM* K.SQTYM* |
| 2301 | 2 | 3.067 | 0.057 | 18 | 32 P1 | sp P48432 K.SQTYM* K.SQTYM* |

|      |   |       |       |    |       |                             |
|------|---|-------|-------|----|-------|-----------------------------|
| 2312 | 2 | 3.031 | 0.063 | 18 | 32 P1 | sp P48432 K.SQTYM* K.SQTYM* |
| 2339 | 2 | 2.979 | 0.088 | 19 | 32 P1 | sp P48432 K.SQTYM* K.SQTYM* |
| 2354 | 2 | 2.969 | 0.058 | 15 | 32 P1 | sp P48432 K.SQTYM* K.SQTYM* |
| 2348 | 2 | 2.949 | 0.069 | 17 | 32 P1 | sp P48432 K.SQTYM* K.SQTYM* |
| 2322 | 3 | 2.931 | 0.196 | 28 | 64 P1 | sp P48432 K.SQTYM* K.SQTYM* |
| 2330 | 2 | 2.925 | 0.094 | 17 | 32 P1 | sp P48432 K.SQTYM* K.SQTYM* |
| 2336 | 2 | 2.92  | 0.023 | 16 | 32 P1 | sp P48432 K.SQTYM* K.SQTYM* |
| 2337 | 3 | 2.916 | 0.113 | 27 | 64 P1 | sp P48432 K.SQTYM* K.SQTYM* |
| 2443 | 2 | 2.913 | 0.081 | 15 | 32 P1 | sp P48432 K.SQTYM* K.SQTYM* |
| 2324 | 2 | 2.897 | 0.056 | 19 | 32 P1 | sp P48432 K.SQTYM* K.SQTYM* |
| 2309 | 2 | 2.832 | 0.035 | 19 | 32 P1 | sp P48432 K.SQTYM* K.SQTYM* |
| 2316 | 3 | 2.829 | 0.167 | 26 | 64 P1 | sp P48432 K.SQTYM* K.SQTYM* |
| 2362 | 2 | 2.815 | 0.101 | 15 | 32 P1 | sp P48432 K.SQTYM* K.SQTYM* |
| 2303 | 2 | 2.8   | 0.061 | 19 | 32 P1 | sp P48432 K.SQTYM* K.SQTYM* |
| 2318 | 2 | 2.8   | 0.052 | 18 | 32 P1 | sp P48432 K.SQTYM* K.SQTYM* |
| 2315 | 2 | 2.795 | 0.041 | 17 | 32 P1 | sp P48432 K.SQTYM* K.SQTYM* |
| 2307 | 3 | 2.769 | 0.078 | 24 | 64 P1 | sp P48432 K.SQTYM* K.SQTYM* |
| 2364 | 2 | 2.767 | 0.09  | 19 | 32 P1 | sp P48432 K.SQTYM* K.SQTYM* |
| 2346 | 3 | 2.763 | 0.207 | 24 | 64 P1 | sp P48432 K.SQTYM* K.SQTYM* |
| 2360 | 2 | 2.762 | 0.128 | 20 | 32 P1 | sp P48432 K.SQTYM* K.SQTYM* |
| 2298 | 2 | 2.743 | 0.049 | 19 | 32 P1 | sp P48432 K.SQTYM* K.SQTYM* |
| 2372 | 2 | 2.737 | 0.09  | 17 | 32 P1 | sp P48432 K.SQTYM* K.SQTYM* |
| 2463 | 2 | 2.696 | 0.014 | 20 | 32 P1 | sp P48432 K.SQTYM* K.SQTYM* |
| 2331 | 3 | 2.674 | 0.196 | 25 | 64 P1 | sp P48432 K.SQTYM* K.SQTYM* |
| 2291 | 2 | 2.651 | 0.141 | 15 | 32 P1 | sp P48432 K.SQTYM* K.SQTYM* |
| 2349 | 3 | 2.621 | 0.129 | 24 | 64 P1 | sp P48432 K.SQTYM* K.SQTYM* |
| 2304 | 3 | 2.618 | 0.129 | 23 | 64 P1 | sp P48432 K.SQTYM* K.SQTYM* |
| 2789 | 2 | 2.602 | 0.037 | 16 | 32 P1 | sp P48432 K.SQTYM* K.SQTYM* |
| 2343 | 3 | 2.59  | 0.056 | 22 | 64 P1 | sp P48432 K.SQTYM* K.SQTYM* |
| 2368 | 2 | 2.578 | 0.097 | 17 | 32 P1 | sp P48432 K.SQTYM* K.SQTYM* |
| 2374 | 2 | 2.509 | 0.137 | 15 | 32 P1 | sp P48432 K.SQTYM* K.SQTYM* |
| 2352 | 3 | 2.468 | 0.233 | 21 | 64 P1 | sp P48432 K.SQTYM* K.SQTYM* |
| 2376 | 2 | 2.453 | 0.171 | 14 | 32 P1 | sp P48432 K.SQTYM* K.SQTYM* |
| 2313 | 3 | 2.442 | 0.208 | 24 | 64 P1 | sp P48432 K.SQTYM* K.SQTYM* |
| 2460 | 2 | 2.405 | 0.084 | 16 | 32 P1 | sp P48432 K.SQTYM* K.SQTYM* |
| 2319 | 3 | 2.361 | 0.205 | 23 | 64 P1 | sp P48432 K.SQTYM* K.SQTYM* |
| 2431 | 2 | 2.348 | 0.034 | 13 | 32 P1 | sp P48432 K.SQTYM* K.SQTYM* |
| 2310 | 3 | 2.312 | 0.221 | 23 | 64 P1 | sp P48432 K.SQTYM* K.SQTYM* |
| 2299 | 3 | 2.242 | 0.172 | 22 | 64 P1 | sp P48432 K.SQTYM* K.SQTYM* |
| 2392 | 2 | 2.189 | 0.109 | 15 | 32 P1 | sp P48432 K.SQTYM* K.SQTYM* |
| 2433 | 2 | 2.176 | 0.057 | 12 | 32 P1 | sp P48432 K.SQTYM* K.SQTYM* |
| 2168 | 3 | 2.159 | 0.178 | 22 | 64 P1 | sp P48432 K.SQT#YM K.SQT#YM |
| 2366 | 2 | 2.132 | 0.102 | 16 | 32 P1 | sp P48432 K.SQTYM* K.SQTYM* |
| 2295 | 2 | 2.128 | 0.12  | 16 | 32 P1 | sp P48432 K.SQTYM* K.SQTYM* |
| 2384 | 2 | 2.123 | 0.032 | 14 | 32 P1 | sp P48432 K.SQTYM* K.SQTYM* |
| 2785 | 2 | 2.119 | 0.179 | 13 | 32 P1 | sp P48432 K.SQTYM* K.SQTYM* |
| 2110 | 3 | 2.099 | 0.209 | 18 | 64 P1 | sp P48432 K.SQT#YM K.SQT#YM |

|      |   |       |       |    |       |                             |
|------|---|-------|-------|----|-------|-----------------------------|
| 2382 | 2 | 2.076 | 0.117 | 16 | 32 P1 | sp P48432 K.SQTYM* K.SQTYM* |
| 2370 | 2 | 1.938 | 0.152 | 14 | 32 P1 | sp P48432 K.SQTYM* K.SQTYM* |
| 2390 | 2 | 1.874 | 0.19  | 13 | 32 P1 | sp P48432 K.SQTYM* K.SQTYM* |
| 2358 | 3 | 1.832 | 0.16  | 21 | 64 P1 | sp P48432 K.SQTYM* K.SQTYM* |
| 2147 | 3 | 1.829 | 0.179 | 21 | 64 P1 | sp P48432 K.SQT#YM K.SQT#YM |
| 2380 | 2 | 1.821 | 0.179 | 12 | 32 P1 | sp P48432 K.SQTYM* K.SQTYM* |
| 2791 | 2 | 1.773 | 0.208 | 13 | 32 P1 | sp P48432 K.SQTYM* K.SQTYM* |
| 2388 | 2 | 1.757 | 0.091 | 10 | 32 P1 | sp P48432 K.SQTYM* K.SQTYM* |
| 2441 | 2 | 1.7   | 0.025 | 13 | 32 P1 | sp P48432 K.SQTYM* K.SQTYM* |
| 2386 | 2 | 1.609 | 0.019 | 11 | 32 P1 | sp P48432 K.SQTYM* K.SQTYM* |
| 2398 | 2 | 1.575 | 0.173 | 14 | 32 P1 | sp P48432 K.SQTYM* K.SQTYM* |
| 2429 | 2 | 1.556 | 0.001 | 14 | 32 P1 | sp P48432 K.SQTYM* K.SQTYM* |
| 2794 | 2 | 1.524 | 0.028 | 11 | 32 P1 | sp P48432 K.SQTYM* K.SQTYM* |
| 2489 | 2 | 1.518 | 0.039 | 11 | 32 P1 | sp P48432 K.SQTYM* K.SQTYM* |
| 2787 | 2 | 1.381 | 0.095 | 11 | 32 P1 | sp P48432 K.SQTYM* K.SQTYM* |
| 2484 | 2 | 1.229 | 0.005 | 11 | 32 P1 | sp P48432 K.SQT#YM K.SQT#YM |
| 2396 | 2 | 1.206 | 0.096 | 12 | 32 P1 | sp P48432 K.SQTYM* K.SQTYM* |
| 2405 | 2 | 1.163 | 0.142 | 12 | 32 P1 | sp P48432 K.SQTYM* K.SQTYM* |
| 2796 | 2 | 1.018 | 0.048 | 10 | 32 P1 | sp P48432 K.SQTYM* K.SQTYM* |
| 2469 | 2 | 2.241 | 0.01  | 12 | 32 P2 | sp P48432 K.SQTYM* K.SQTYM* |
| 2478 | 2 | 3.909 | 0.005 | 17 | 32 P2 | sp P48432 K.SQTYM* K.SQTYM* |
| 2484 | 2 | 2.393 | 0.047 | 16 | 32 P2 | sp P48432 K.SQTYM* K.SQTYM* |
| 2493 | 2 | 2.526 | 0.005 | 16 | 32 P2 | sp P48432 K.SQTYM* K.SQTYM* |
| 2496 | 2 | 2.729 | 0.018 | 18 | 32 P2 | sp P48432 K.SQTYM* K.SQTYM* |
| 2502 | 2 | 3.622 | 0.013 | 20 | 32 P2 | sp P48432 K.SQTYM* K.SQTYM* |
| 2505 | 2 | 2.986 | 0.074 | 18 | 32 P2 | sp P48432 K.SQTYM* K.SQTYM* |
| 2511 | 2 | 2.792 | 0.104 | 20 | 32 P2 | sp P48432 K.SQTYM* K.SQTYM* |
| 2517 | 2 | 2.583 | 0.007 | 17 | 32 P2 | sp P48432 K.SQTYM* K.SQTYM* |
| 2523 | 2 | 2.366 | 0.025 | 18 | 32 P2 | sp P48432 K.SQTYM* K.SQTYM* |
| 2526 | 2 | 2.257 | 0.011 | 17 | 32 P2 | sp P48432 K.SQTYM* K.SQTYM* |
| 2543 | 2 | 2.419 | 0.005 | 18 | 32 P2 | sp P48432 K.SQTYM* K.SQTYM* |
| 2586 | 3 | 1.314 | 0.085 | 18 | 64 P2 | sp P48432 K.SQT#YM K.SQT#YM |
| 2590 | 3 | 2.05  | 0.012 | 22 | 64 P2 | sp P48432 K.SQT#YM K.SQT#YM |
| 2599 | 2 | 1.227 | 0.094 | 9  | 32 P2 | sp P48432 K.SQTYM* K.SQT#YM |
| 2601 | 3 | 1.365 | 0.089 | 14 | 64 P2 | sp P48432 K.S#QTYM K.S#QTYM |
| 2511 | 2 | 3.526 | 0.004 | 17 | 32 P2 | sp P48432 K.SQTYM* K.SQTYM* |
| 2496 | 2 | 3.459 | 0.052 | 19 | 32 P2 | sp P48432 K.SQTYM* K.SQTYM* |
| 2472 | 2 | 3.291 | 0.019 | 20 | 32 P2 | sp P48432 K.SQTYM* K.SQTYM* |
| 2499 | 2 | 3.208 | 0.008 | 18 | 32 P2 | sp P48432 K.SQTYM* K.SQTYM* |
| 2493 | 2 | 2.97  | 0.007 | 14 | 32 P2 | sp P48432 K.SQTYM* K.SQTYM* |
| 2468 | 2 | 2.849 | 0.041 | 16 | 32 P2 | sp P48432 K.SQTYM* K.SQTYM* |
| 2490 | 2 | 2.703 | 0.041 | 19 | 32 P2 | sp P48432 K.SQTYM* K.SQTYM* |
| 2378 | 3 | 2.665 | 0.179 | 20 | 64 P2 | sp P48432 K.SQT#YM K.SQT#YM |
| 2508 | 2 | 2.616 | 0.018 | 17 | 32 P2 | sp P48432 K.SQTYM* K.SQTYM* |
| 2484 | 2 | 2.61  | 0.022 | 19 | 32 P2 | sp P48432 K.SQTYM* K.SQTYM* |
| 2481 | 2 | 2.508 | 0.017 | 16 | 32 P2 | sp P48432 K.SQTYM* K.SQTYM* |
| 2475 | 2 | 2.424 | 0.081 | 15 | 32 P2 | sp P48432 K.SQTYM* K.SQTYM* |

|      |   |       |       |    |       |                             |
|------|---|-------|-------|----|-------|-----------------------------|
| 2470 | 2 | 2.418 | 0.029 | 14 | 32 P2 | sp P48432 K.SQTYM* K.SQTYM* |
| 2534 | 2 | 1.939 | 0.113 | 15 | 32 P2 | sp P48432 K.SQTYM* K.SQTYM* |
| 2531 | 2 | 1.636 | 0.017 | 11 | 32 P2 | sp P48432 K.SQTYM* K.SQTYM* |
| 2547 | 2 | 1.21  | 0.002 | 10 | 32 P2 | sp P48432 K.SQT#YM K.SQT#YM |
| 2740 | 2 | 4.31  | 0.676 | 22 | 32 P3 | sp P48432 K.AQAYM* K.AQAYM* |
| 2685 | 2 | 4.222 | 0.668 | 22 | 32 P3 | sp P48432 K.AQAYM* K.AQAYM* |
| 2722 | 3 | 4.137 | 0.78  | 34 | 64 P3 | sp P48432 K.AQAYM* K.AQAYM* |
| 2706 | 2 | 4.111 | 0.686 | 22 | 32 P3 | sp P48432 K.AQAYM* K.AQAYM* |
| 2709 | 2 | 4.016 | 0.708 | 23 | 32 P3 | sp P48432 K.AQAYM* K.AQAYM* |
| 2729 | 3 | 3.991 | 0.756 | 31 | 64 P3 | sp P48432 K.AQAYM* K.AQAYM* |
| 2703 | 2 | 3.975 | 0.665 | 21 | 32 P3 | sp P48432 K.AQAYM* K.AQAYM* |
| 2688 | 2 | 3.97  | 0.681 | 24 | 32 P3 | sp P48432 K.AQAYM* K.AQAYM* |
| 2694 | 2 | 3.934 | 0.685 | 24 | 32 P3 | sp P48432 K.AQAYM* K.AQAYM* |
| 2697 | 2 | 3.924 | 0.652 | 23 | 32 P3 | sp P48432 K.AQAYM* K.AQAYM* |
| 2689 | 3 | 3.883 | 0.79  | 35 | 64 P3 | sp P48432 K.AQAYM* K.AQAYM* |
| 2794 | 3 | 3.874 | 0.812 | 29 | 64 P3 | sp P48432 K.AQAYM* K.AQAYM* |
| 2753 | 3 | 3.871 | 0.813 | 30 | 64 P3 | sp P48432 K.AQAYM* K.AQAYM* |
| 2731 | 2 | 3.844 | 0.733 | 22 | 32 P3 | sp P48432 K.AQAYM* K.AQAYM* |
| 2713 | 3 | 3.71  | 0.772 | 35 | 64 P3 | sp P48432 K.AQAYM* K.AQAYM* |
| 2712 | 2 | 3.697 | 0.636 | 24 | 32 P3 | sp P48432 K.AQAYM* K.AQAYM* |
| 2691 | 2 | 3.693 | 0.627 | 23 | 32 P3 | sp P48432 K.AQAYM* K.AQAYM* |
| 2719 | 3 | 3.683 | 0.739 | 35 | 64 P3 | sp P48432 K.AQAYM* K.AQAYM* |
| 2698 | 3 | 3.679 | 0.754 | 34 | 64 P3 | sp P48432 K.AQAYM* K.AQAYM* |
| 2721 | 2 | 3.678 | 0.723 | 24 | 32 P3 | sp P48432 K.AQAYM* K.AQAYM* |
| 2734 | 2 | 3.67  | 0.739 | 23 | 32 P3 | sp P48432 K.AQAYM* K.AQAYM* |
| 2695 | 3 | 3.657 | 0.776 | 36 | 64 P3 | sp P48432 K.AQAYM* K.AQAYM* |
| 2700 | 2 | 3.653 | 0.637 | 23 | 32 P3 | sp P48432 K.AQAYM* K.AQAYM* |
| 2704 | 3 | 3.651 | 0.739 | 35 | 64 P3 | sp P48432 K.AQAYM* K.AQAYM* |
| 2732 | 3 | 3.625 | 0.66  | 33 | 64 P3 | sp P48432 K.AQAYM* K.AQAYM* |
| 2744 | 3 | 3.623 | 0.66  | 30 | 64 P3 | sp P48432 K.AQAYM* K.AQAYM* |
| 2741 | 3 | 3.599 | 0.807 | 29 | 64 P3 | sp P48432 K.AQAYM* K.AQAYM* |
| 2715 | 2 | 3.587 | 0.641 | 23 | 32 P3 | sp P48432 K.AQAYM* K.AQAYM* |
| 2701 | 3 | 3.567 | 0.722 | 36 | 64 P3 | sp P48432 K.AQAYM* K.AQAYM* |
| 2718 | 2 | 3.562 | 0.765 | 21 | 32 P3 | sp P48432 K.AQAYM* K.AQAYM* |
| 2716 | 3 | 3.554 | 0.767 | 34 | 64 P3 | sp P48432 K.AQAYM* K.AQAYM* |
| 2686 | 3 | 3.543 | 0.752 | 36 | 64 P3 | sp P48432 K.AQAYM* K.AQAYM* |
| 2728 | 2 | 3.532 | 0.709 | 22 | 32 P3 | sp P48432 K.AQAYM* K.AQAYM* |
| 2724 | 2 | 3.529 | 0.568 | 22 | 32 P3 | sp P48432 K.AQAYM* K.AQAYM* |
| 2707 | 3 | 3.489 | 0.759 | 35 | 64 P3 | sp P48432 K.AQAYM* K.AQAYM* |
| 2768 | 3 | 3.483 | 0.751 | 29 | 64 P3 | sp P48432 K.AQAYM* K.AQAYM* |
| 2738 | 3 | 3.475 | 0.703 | 30 | 64 P3 | sp P48432 K.AQAYM* K.AQAYM* |
| 2683 | 2 | 3.411 | 0.704 | 22 | 32 P3 | sp P48432 K.AQAYM* K.AQAYM* |
| 2836 | 2 | 3.383 | 0.757 | 20 | 32 P3 | sp P48432 K.AQAYM* K.AQAYM* |
| 2746 | 2 | 3.379 | 0.753 | 21 | 32 P3 | sp P48432 K.AQAYM* K.AQAYM* |
| 2743 | 2 | 3.346 | 0.694 | 20 | 32 P3 | sp P48432 K.AQAYM* K.AQAYM* |
| 2752 | 2 | 3.332 | 0.701 | 22 | 32 P3 | sp P48432 K.AQAYM* K.AQAYM* |
| 2692 | 3 | 3.32  | 0.782 | 35 | 64 P3 | sp P48432 K.AQAYM* K.AQAYM* |

|      |   |       |       |    |       |                             |
|------|---|-------|-------|----|-------|-----------------------------|
| 2737 | 2 | 3.315 | 0.725 | 22 | 32 P3 | sp P48432 K.AQAYM* K.AQAYM* |
| 2735 | 3 | 3.309 | 0.713 | 32 | 64 P3 | sp P48432 K.AQAYM* K.AQAYM* |
| 2756 | 3 | 3.252 | 0.798 | 31 | 64 P3 | sp P48432 K.AQAYM* K.AQAYM* |
| 2767 | 2 | 3.231 | 0.764 | 19 | 32 P3 | sp P48432 K.AQAYM* K.AQAYM* |
| 2747 | 3 | 3.219 | 0.664 | 27 | 64 P3 | sp P48432 K.AQAYM* K.AQAYM* |
| 2725 | 3 | 3.167 | 0.69  | 31 | 64 P3 | sp P48432 K.AQAYM* K.AQAYM* |
| 2749 | 2 | 3.142 | 0.852 | 22 | 32 P3 | sp P48432 K.AQAYM* K.AQAYM* |
| 2777 | 3 | 3.142 | 0.762 | 26 | 64 P3 | sp P48432 K.AQAYM* K.AQAYM* |
| 2710 | 3 | 3.105 | 0.721 | 35 | 64 P3 | sp P48432 K.AQAYM* K.AQAYM* |
| 2779 | 2 | 3.099 | 0.766 | 19 | 32 P3 | sp P48432 K.AQAYM* K.AQAYM* |
| 2761 | 2 | 3.059 | 0.693 | 17 | 32 P3 | sp P48432 K.AQAYM* K.AQAYM* |
| 2770 | 2 | 3.021 | 0.679 | 21 | 32 P3 | sp P48432 K.AQAYM* K.AQAYM* |
| 2759 | 3 | 2.995 | 0.654 | 27 | 64 P3 | sp P48432 K.AQAYM* K.AQAYM* |
| 2758 | 2 | 2.981 | 0.714 | 20 | 32 P3 | sp P48432 K.AQAYM* K.AQAYM* |
| 2839 | 3 | 2.936 | 0.715 | 26 | 64 P3 | sp P48432 K.AQAYM* K.AQAYM* |
| 2774 | 3 | 2.885 | 0.829 | 28 | 64 P3 | sp P48432 K.AQAYM* K.AQAYM* |
| 2780 | 3 | 2.86  | 0.681 | 24 | 64 P3 | sp P48432 K.AQAYM* K.AQAYM* |
| 2843 | 3 | 2.848 | 0.62  | 22 | 64 P3 | sp P48432 K.AQAYM* K.AQAYM* |
| 2755 | 2 | 2.804 | 0.772 | 17 | 32 P3 | sp P48432 K.AQAYM* K.AQAYM* |
| 2762 | 3 | 2.794 | 0.716 | 29 | 64 P3 | sp P48432 K.AQAYM* K.AQAYM* |
| 2849 | 3 | 2.761 | 0.673 | 27 | 64 P3 | sp P48432 K.AQAYM* K.AQAYM* |
| 2809 | 2 | 2.731 | 0.737 | 19 | 32 P3 | sp P48432 K.AQAYM* K.AQAYM* |
| 2773 | 2 | 2.723 | 0.814 | 16 | 32 P3 | sp P48432 K.AQAYM* K.AQAYM* |
| 2765 | 3 | 2.723 | 0.734 | 26 | 64 P3 | sp P48432 K.AQAYM* K.AQAYM* |
| 2802 | 2 | 2.717 | 0.718 | 18 | 32 P3 | sp P48432 K.AQAYM* K.AQAYM* |
| 2771 | 3 | 2.709 | 0.76  | 26 | 64 P3 | sp P48432 K.AQAYM* K.AQAYM* |
| 2793 | 2 | 2.689 | 0.692 | 18 | 32 P3 | sp P48432 K.AQAYM* K.AQAYM* |
| 2800 | 2 | 2.649 | 0.865 | 14 | 32 P3 | sp P48432 K.AQAYM* K.AQAYM* |
| 2828 | 3 | 2.648 | 0.383 | 23 | 64 P3 | sp P48432 K.AQAYM* K.AQAYM* |
| 2819 | 2 | 2.571 | 0.846 | 17 | 32 P3 | sp P48432 K.AQAYM* K.AQAYM* |
| 2764 | 2 | 2.567 | 0.611 | 16 | 32 P3 | sp P48432 K.AQAYM* K.AQAYM* |
| 2845 | 3 | 2.557 | 0.582 | 23 | 64 P3 | sp P48432 K.AQAYM* K.AQAYM* |
| 2853 | 3 | 2.551 | 0.718 | 20 | 64 P3 | sp P48432 K.AQAYM* K.AQAYM* |
| 2776 | 2 | 2.55  | 0.791 | 18 | 32 P3 | sp P48432 K.AQAYM* K.AQAYM* |
| 2789 | 2 | 2.512 | 0.758 | 14 | 32 P3 | sp P48432 K.AQAYM* K.AQAYM* |
| 2807 | 3 | 2.507 | 0.595 | 23 | 64 P3 | sp P48432 K.AQAYM* K.AQAYM* |
| 2813 | 2 | 2.502 | 0.732 | 19 | 32 P3 | sp P48432 K.AQAYM* K.AQAYM* |
| 2834 | 3 | 2.413 | 0.737 | 26 | 64 P3 | sp P48432 K.AQAYM* K.AQAYM* |
| 2783 | 3 | 2.407 | 0.588 | 19 | 64 P3 | sp P48432 K.AQAYM* K.AQAYM* |
| 2837 | 3 | 2.389 | 0.537 | 19 | 64 P3 | sp P48432 K.AQAYM* K.AQAYM* |
| 3083 | 3 | 2.335 | 0.543 | 20 | 64 P3 | sp P48432 K.AQAYM K.AQAYM   |
| 2806 | 2 | 2.311 | 0.761 | 16 | 32 P3 | sp P48432 K.AQAYM* K.AQAYM* |
| 2750 | 3 | 2.304 | 0.74  | 27 | 64 P3 | sp P48432 K.AQAYM* K.AQAYM* |
| 2785 | 2 | 2.289 | 0.721 | 19 | 32 P3 | sp P48432 K.AQAYM* K.AQAYM* |
| 2782 | 2 | 2.277 | 0.697 | 15 | 32 P3 | sp P48432 K.AQAYM* K.AQAYM* |
| 2822 | 3 | 2.226 | 0.283 | 21 | 64 P3 | sp P48432 K.AQAYM* K.AQAYM* |
| 2791 | 3 | 2.212 | 0.613 | 24 | 64 P3 | sp P48432 K.AQAYM* K.AQAYM* |

|      |   |       |       |    |       |                             |
|------|---|-------|-------|----|-------|-----------------------------|
| 3079 | 3 | 2.211 | 0.508 | 22 | 64 P3 | sp P48432 K.AQAYM K.AQAYM   |
| 2851 | 2 | 2.183 | 0.727 | 14 | 32 P3 | sp P48432 K.AQAYM* K.AQAYM* |
| 2804 | 2 | 2.175 | 0.809 | 15 | 32 P3 | sp P48432 K.AQAYM* K.AQAYM* |
| 2847 | 2 | 2.166 | 0.752 | 13 | 32 P3 | sp P48432 K.AQAYM* K.AQAYM* |
| 2841 | 2 | 2.141 | 0.849 | 16 | 32 P3 | sp P48432 K.AQAYM* K.AQAYM* |
| 2814 | 3 | 2.092 | 0.658 | 20 | 64 P3 | sp P48432 K.AQAYM* K.AQAYM* |
| 2823 | 2 | 2.074 | 0.808 | 16 | 32 P3 | sp P48432 K.AQAYM* K.AQAYM* |
| 2787 | 3 | 2.072 | 0.669 | 19 | 64 P3 | sp P48432 K.AQAYM* K.AQAYM* |
| 2832 | 2 | 2.072 | 0.863 | 13 | 32 P3 | sp P48432 K.AQAYM* K.AQAYM* |
| 2816 | 2 | 2.071 | 0.83  | 17 | 32 P3 | sp P48432 K.AQAYM* K.AQAYM* |
| 2820 | 3 | 2.048 | 0.457 | 20 | 64 P3 | sp P48432 K.AQAYM* K.AQAYM* |
| 2860 | 2 | 2.019 | 0.801 | 14 | 32 P3 | sp P48432 K.AQAYM* K.AQAYM* |
| 2659 | 3 | 1.937 | 0.401 | 19 | 64 P3 | sp P48432 K.AQAYM* K.AQAYM* |
| 2855 | 2 | 1.86  | 0.721 | 15 | 32 P3 | sp P48432 K.AQAYM* K.AQAYM* |
| 2547 | 2 | 1.824 | 0.828 | 11 | 32 P3 | sp P48432 K.AQAYM* K.AQAYM* |
| 2893 | 2 | 1.69  | 0.847 | 13 | 32 P3 | sp P48432 K.AQAYM* K.AQAYM* |
| 2858 | 2 | 1.669 | 0.703 | 12 | 32 P3 | sp P48432 K.AQAYM* K.AQAYM* |
| 2904 | 2 | 1.657 | 0.696 | 14 | 32 P3 | sp P48432 K.AQAYM* K.AQAYM* |
| 2606 | 3 | 1.651 | 0.267 | 26 | 64 P3 | sp P48432 K.AQAYM K.AQAYM   |
| 2867 | 2 | 1.635 | 0.926 | 12 | 32 P3 | sp P48432 K.AQAYM* K.AQAYM* |
| 2811 | 2 | 1.623 | 0.782 | 13 | 32 P3 | sp P48432 K.AQAYM* K.AQAYM* |
| 2549 | 2 | 1.621 | 0.764 | 14 | 32 P3 | sp P48432 K.AQAYM* K.AQAYM* |
| 2922 | 2 | 1.529 | 0.758 | 13 | 32 P3 | sp P48432 K.AQAYM* K.AQAYM* |
| 2885 | 2 | 1.492 | 0.901 | 12 | 32 P3 | sp P48432 K.AQAYM* K.AQAYM* |
| 2381 | 2 | 1.428 | 0.461 | 10 | 32 P3 | sp P48432 K.AQAYM* K.AQAYM* |
| 2906 | 2 | 1.323 | 0.572 | 13 | 32 P3 | sp P48432 K.AQAYM* K.AQAYM* |
| 2939 | 2 | 1.302 | 0.473 | 11 | 32 P3 | sp P48432 K.AQAYM* K.AQAYM* |
| 3181 | 2 | 1.225 | 0.582 | 11 | 32 P3 | sp P48432 K.AQAYM* K.AQAYM* |
| 2926 | 2 | 1.205 | 0.808 | 11 | 32 P3 | sp P48432 K.AQAYM* K.AQAYM* |
| 2444 | 2 | 1.191 | 0.438 | 7  | 32 P3 | sp P48432 K.AQAYM* K.AQAYM* |
| 3117 | 2 | 1.178 | 0.416 | 11 | 32 P3 | sp P48432 K.AQAYM* K.AQAYM* |
| 2507 | 2 | 1.162 | 0.937 | 8  | 32 P3 | sp P48432 K.AQAYM* K.AQAYM* |
| 2624 | 3 | 1.149 | 0.329 | 21 | 64 P3 | sp P48432 K.AQAYM K.AQAYM   |
| 3012 | 2 | 1.139 | 0.504 | 13 | 32 P3 | sp P48432 K.AQAYM K.AQAYM   |
| 2889 | 2 | 1.122 | 0.681 | 11 | 32 P3 | sp P48432 K.AQAYM* K.AQAYM* |
| 2826 | 2 | 1.122 | 0.637 | 12 | 32 P3 | sp P48432 K.AQAYM* K.AQAYM* |
| 2378 | 2 | 1.101 | 0.377 | 9  | 32 P3 | sp P48432 K.AQAYM* K.AQAYM* |
| 2579 | 3 | 1.082 | 0.469 | 21 | 64 P3 | sp P48432 K.AQAYM K.AQAYM   |
| 2874 | 2 | 1.068 | 0.54  | 9  | 32 P3 | sp P48432 K.AQAYM* K.AQAYM* |
| 2364 | 2 | 1.054 | 0.811 | 9  | 32 P3 | sp P48432 K.AQAYM* K.AQAYM* |
| 2694 | 2 | 4.03  | 0.704 | 24 | 32 P3 | sp P48432 K.AQAYM* K.AQAYM* |
| 2682 | 2 | 4.001 | 0.708 | 23 | 32 P3 | sp P48432 K.AQAYM* K.AQAYM* |
| 2707 | 3 | 3.946 | 0.715 | 36 | 64 P3 | sp P48432 K.AQAYM* K.AQAYM* |
| 2700 | 2 | 3.913 | 0.69  | 22 | 32 P3 | sp P48432 K.AQAYM* K.AQAYM* |
| 2709 | 2 | 3.897 | 0.677 | 21 | 32 P3 | sp P48432 K.AQAYM* K.AQAYM* |
| 2716 | 3 | 3.871 | 0.75  | 34 | 64 P3 | sp P48432 K.AQAYM* K.AQAYM* |
| 2728 | 3 | 3.781 | 0.737 | 34 | 64 P3 | sp P48432 K.AQAYM* K.AQAYM* |



|      |   |       |       |    |       |                             |
|------|---|-------|-------|----|-------|-----------------------------|
| 2680 | 3 | 3.773 | 0.725 | 36 | 64 P3 | sp P48432 K.AQAYM* K.AQAYM* |
| 2734 | 3 | 3.754 | 0.78  | 33 | 64 P3 | sp P48432 K.AQAYM* K.AQAYM* |
| 2746 | 3 | 3.733 | 0.725 | 28 | 64 P3 | sp P48432 K.AQAYM* K.AQAYM* |
| 2724 | 2 | 3.706 | 0.711 | 20 | 32 P3 | sp P48432 K.AQAYM* K.AQAYM* |
| 2685 | 2 | 3.694 | 0.628 | 24 | 32 P3 | sp P48432 K.AQAYM* K.AQAYM* |
| 2736 | 2 | 3.685 | 0.753 | 25 | 32 P3 | sp P48432 K.AQAYM* K.AQAYM* |
| 2689 | 3 | 3.684 | 0.77  | 35 | 64 P3 | sp P48432 K.AQAYM* K.AQAYM* |
| 2703 | 2 | 3.683 | 0.665 | 23 | 32 P3 | sp P48432 K.AQAYM* K.AQAYM* |
| 2679 | 2 | 3.681 | 0.671 | 22 | 32 P3 | sp P48432 K.AQAYM* K.AQAYM* |
| 2712 | 2 | 3.674 | 0.782 | 22 | 32 P3 | sp P48432 K.AQAYM* K.AQAYM* |
| 2718 | 2 | 3.643 | 0.744 | 24 | 32 P3 | sp P48432 K.AQAYM* K.AQAYM* |
| 2677 | 2 | 3.641 | 0.824 | 24 | 32 P3 | sp P48432 K.AQAYM* K.AQAYM* |
| 2695 | 3 | 3.634 | 0.732 | 36 | 64 P3 | sp P48432 K.AQAYM* K.AQAYM* |
| 2697 | 2 | 3.629 | 0.62  | 23 | 32 P3 | sp P48432 K.AQAYM* K.AQAYM* |
| 2691 | 2 | 3.617 | 0.572 | 23 | 32 P3 | sp P48432 K.AQAYM* K.AQAYM* |
| 2769 | 3 | 3.569 | 0.719 | 28 | 64 P3 | sp P48432 K.AQAYM* K.AQAYM* |
| 2721 | 2 | 3.547 | 0.689 | 22 | 32 P3 | sp P48432 K.AQAYM* K.AQAYM* |
| 2704 | 3 | 3.542 | 0.708 | 33 | 64 P3 | sp P48432 K.AQAYM* K.AQAYM* |
| 2683 | 3 | 3.539 | 0.724 | 36 | 64 P3 | sp P48432 K.AQAYM* K.AQAYM* |
| 2706 | 2 | 3.536 | 0.689 | 23 | 32 P3 | sp P48432 K.AQAYM* K.AQAYM* |
| 2755 | 3 | 3.536 | 0.755 | 26 | 64 P3 | sp P48432 K.AQAYM* K.AQAYM* |
| 2686 | 3 | 3.503 | 0.722 | 37 | 64 P3 | sp P48432 K.AQAYM* K.AQAYM* |
| 2710 | 3 | 3.497 | 0.768 | 35 | 64 P3 | sp P48432 K.AQAYM* K.AQAYM* |
| 2715 | 2 | 3.493 | 0.658 | 21 | 32 P3 | sp P48432 K.AQAYM* K.AQAYM* |
| 2688 | 2 | 3.487 | 0.638 | 22 | 32 P3 | sp P48432 K.AQAYM* K.AQAYM* |
| 2713 | 3 | 3.485 | 0.75  | 34 | 64 P3 | sp P48432 K.AQAYM* K.AQAYM* |
| 2719 | 3 | 3.47  | 0.695 | 34 | 64 P3 | sp P48432 K.AQAYM* K.AQAYM* |
| 2739 | 2 | 3.469 | 0.665 | 18 | 32 P3 | sp P48432 K.AQAYM* K.AQAYM* |
| 2692 | 3 | 3.451 | 0.741 | 35 | 64 P3 | sp P48432 K.AQAYM* K.AQAYM* |
| 2722 | 3 | 3.429 | 0.728 | 35 | 64 P3 | sp P48432 K.AQAYM* K.AQAYM* |
| 2698 | 3 | 3.36  | 0.721 | 34 | 64 P3 | sp P48432 K.AQAYM* K.AQAYM* |
| 2701 | 3 | 3.345 | 0.754 | 36 | 64 P3 | sp P48432 K.AQAYM* K.AQAYM* |
| 2733 | 2 | 3.24  | 0.732 | 20 | 32 P3 | sp P48432 K.AQAYM* K.AQAYM* |
| 2752 | 3 | 3.228 | 0.595 | 28 | 64 P3 | sp P48432 K.AQAYM* K.AQAYM* |
| 2727 | 2 | 3.184 | 0.734 | 21 | 32 P3 | sp P48432 K.AQAYM* K.AQAYM* |
| 2740 | 3 | 3.155 | 0.581 | 30 | 64 P3 | sp P48432 K.AQAYM* K.AQAYM* |
| 2725 | 3 | 3.131 | 0.726 | 27 | 64 P3 | sp P48432 K.AQAYM* K.AQAYM* |
| 2742 | 2 | 3.102 | 0.609 | 18 | 32 P3 | sp P48432 K.AQAYM* K.AQAYM* |
| 2771 | 3 | 3.082 | 0.76  | 26 | 64 P3 | sp P48432 K.AQAYM* K.AQAYM* |
| 2775 | 3 | 3.074 | 0.845 | 23 | 64 P3 | sp P48432 K.AQAYM* K.AQAYM* |
| 2782 | 2 | 3.072 | 0.611 | 18 | 32 P3 | sp P48432 K.AQAYM* K.AQAYM* |
| 2786 | 3 | 3.027 | 0.798 | 21 | 64 P3 | sp P48432 K.AQAYM* K.AQAYM* |
| 2730 | 2 | 2.995 | 0.765 | 21 | 32 P3 | sp P48432 K.AQAYM* K.AQAYM* |
| 2749 | 3 | 2.972 | 0.665 | 27 | 64 P3 | sp P48432 K.AQAYM* K.AQAYM* |
| 2748 | 2 | 2.938 | 0.826 | 18 | 32 P3 | sp P48432 K.AQAYM* K.AQAYM* |
| 2793 | 2 | 2.9   | 0.571 | 16 | 32 P3 | sp P48432 K.AQAYM* K.AQAYM* |
| 2743 | 3 | 2.888 | 0.625 | 29 | 64 P3 | sp P48432 K.AQAYM* K.AQAYM* |

|      |   |       |       |    |       |                             |
|------|---|-------|-------|----|-------|-----------------------------|
| 2758 | 3 | 2.872 | 0.728 | 27 | 64 P3 | sp P48432 K.AQAYM* K.AQAYM* |
| 2766 | 3 | 2.864 | 0.749 | 24 | 64 P3 | sp P48432 K.AQAYM* K.AQAYM* |
| 2745 | 2 | 2.83  | 0.756 | 15 | 32 P3 | sp P48432 K.AQAYM* K.AQAYM* |
| 2761 | 3 | 2.819 | 0.583 | 26 | 64 P3 | sp P48432 K.AQAYM* K.AQAYM* |
| 2780 | 2 | 2.807 | 0.892 | 18 | 32 P3 | sp P48432 K.AQAYM* K.AQAYM* |
| 2763 | 2 | 2.798 | 0.878 | 20 | 32 P3 | sp P48432 K.AQAYM* K.AQAYM* |
| 2737 | 3 | 2.776 | 0.769 | 28 | 64 P3 | sp P48432 K.AQAYM* K.AQAYM* |
| 2731 | 3 | 2.736 | 0.609 | 29 | 64 P3 | sp P48432 K.AQAYM* K.AQAYM* |
| 2754 | 2 | 2.705 | 0.892 | 24 | 32 P3 | sp P48432 K.AQAYM* K.AQAYM* |
| 2765 | 2 | 2.693 | 0.843 | 19 | 32 P3 | sp P48432 K.AQAYM* K.AQAYM* |
| 2772 | 2 | 2.669 | 0.842 | 18 | 32 P3 | sp P48432 K.AQAYM* K.AQAYM* |
| 2784 | 2 | 2.659 | 0.766 | 13 | 32 P3 | sp P48432 K.AQAYM* K.AQAYM* |
| 2768 | 2 | 2.648 | 0.801 | 18 | 32 P3 | sp P48432 K.AQAYM* K.AQAYM* |
| 2774 | 2 | 2.59  | 0.64  | 17 | 32 P3 | sp P48432 K.AQAYM* K.AQAYM* |
| 2757 | 2 | 2.587 | 0.791 | 18 | 32 P3 | sp P48432 K.AQAYM* K.AQAYM* |
| 2751 | 2 | 2.469 | 0.653 | 17 | 32 P3 | sp P48432 K.AQAYM* K.AQAYM* |
| 3048 | 3 | 2.372 | 0.546 | 25 | 64 P3 | sp P48432 K.AQAYM K.AQAYM   |
| 2801 | 2 | 2.331 | 0     | 12 | 32 P3 | sp P48432 K.AQAYM* K.AQAYM* |
| 2760 | 2 | 2.278 | 0.769 | 15 | 32 P3 | sp P48432 K.AQAYM* K.AQAYM* |
| 2628 | 3 | 2.212 | 0.846 | 20 | 64 P3 | sp P48432 K.AQAYM* K.AQAYM* |
| 2777 | 2 | 2.195 | 0.964 | 16 | 32 P3 | sp P48432 K.AQAYM* K.AQAYM* |
| 2974 | 2 | 2.113 | 0.584 | 18 | 32 P3 | sp P48432 K.AQAYM K.AQAYM   |
| 3090 | 2 | 2.077 | 0.303 | 14 | 32 P3 | sp P48432 K.AQAYM* K.AQAYM* |
| 2789 | 2 | 2.07  | 0.594 | 15 | 32 P3 | sp P48432 K.AQAYM* K.AQAYM* |
| 2814 | 2 | 2.055 | 0.385 | 12 | 32 P3 | sp P48432 K.AQAYM* K.AQAYM* |
| 3052 | 3 | 2.049 | 0.793 | 25 | 64 P3 | sp P48432 K.AQAYM K.AQAYM   |
| 2821 | 2 | 2.03  | 0.957 | 12 | 32 P3 | sp P48432 K.AQAYM* K.AQAYM* |
| 2778 | 3 | 1.997 | 0.718 | 21 | 64 P3 | sp P48432 K.AQAYM* K.AQAYM* |
| 2791 | 2 | 1.949 | 0     | 15 | 32 P3 | sp P48432 K.AQAYM* K.AQAYM* |
| 3088 | 2 | 1.796 | 0.494 | 14 | 32 P3 | sp P48432 K.AQAYM* K.AQAYM* |
| 3086 | 2 | 1.769 | 0.391 | 14 | 32 P3 | sp P48432 K.AQAYM* K.AQAYM* |
| 2824 | 2 | 1.731 | 0.737 | 15 | 32 P3 | sp P48432 K.AQAYM* K.AQAYM* |
| 2978 | 2 | 1.657 | 0.499 | 11 | 32 P3 | sp P48432 K.AQAYM K.AQAYM   |
| 2800 | 3 | 1.617 | 0.749 | 19 | 64 P3 | sp P48432 K.AQAYM* K.AQAYM* |
| 2976 | 2 | 1.419 | 0.803 | 15 | 32 P3 | sp P48432 K.AQAYM K.AQAYM   |
| 2505 | 2 | 1.384 | 0.842 | 10 | 32 P3 | sp P48432 K.AQAYM* K.AQAYM* |
| 2632 | 3 | 1.364 | 0.491 | 22 | 64 P3 | sp P48432 K.AQAYM K.AQAYM   |
| 2816 | 2 | 1.36  | 0.805 | 9  | 32 P3 | sp P48432 K.AQAYM* K.AQAYM* |
| 2379 | 2 | 1.326 | 0.405 | 9  | 32 P3 | sp P48432 K.AQAYM* K.AQAYM* |
| 2818 | 2 | 1.325 | 0.639 | 9  | 32 P3 | sp P48432 K.AQAYM* K.AQAYM* |
| 2833 | 2 | 1.314 | 0.457 | 10 | 32 P3 | sp P48432 K.AQAYM* K.AQAYM* |
| 2892 | 2 | 1.265 | 0.607 | 10 | 32 P3 | sp P48432 K.AQAYM* K.AQAYM* |
| 2493 | 2 | 1.25  | 0.942 | 9  | 32 P3 | sp P48432 K.AQAYM* K.AQAYM* |
| 2812 | 2 | 1.207 | 0.793 | 10 | 32 P3 | sp P48432 K.AQAYM* K.AQAYM* |
| 2617 | 3 | 1.171 | 0.227 | 22 | 64 P3 | sp P48432 K.AQAYM K.AQAYM   |
| 2624 | 3 | 1.048 | 0.556 | 19 | 64 P3 | sp P48432 K.AQAYM K.AQAYM   |
| 3092 | 2 | 1.047 | 0.865 | 12 | 32 P3 | sp P48432 K.AQAYM* K.AQAYM* |

|      |   |       |       |   |       |                             |
|------|---|-------|-------|---|-------|-----------------------------|
| 2376 | 2 | 1.043 | 0.43  | 9 | 32 P3 | sp P48432 K.AQAYM* K.AQAYM* |
| 2372 | 2 | 1.023 | 0.465 | 8 | 32 P3 | sp P48432 K.AQAYM* K.AQAYM* |

2.

| Max Score | Site 1 Posi | Site 1 Scor | Site 2 Posi | Site 2 Score |
|-----------|-------------|-------------|-------------|--------------|
| 49.483    | 8           | 17.009      | 0           | 0            |
| 100.037   | 8           | 31.275      | 0           | 0            |
| 100.037   | 8           | 17.009      | 0           | 0            |
| 51.225    | 8           | 16.144      | 0           | 0            |
| 109.721   | 8           | 17.009      | 0           | 0            |
| 100.037   | 8           | 17.009      | 0           | 0            |
| 130.098   | 8           | 17.009      | 0           | 0            |
| 51.225    | 8           | 20.167      | 0           | 0            |
| 109.721   | 8           | 17.009      | 0           | 0            |
| 93.768    | 8           | 16.144      | 0           | 0            |
| 64.298    | 8           | 20.167      | 0           | 0            |
| 93.768    | 8           | 44.278      | 0           | 0            |
| 130.098   | 8           | 17.009      | 0           | 0            |
| 109.721   | 8           | 17.009      | 0           | 0            |
| 151.788   | 8           | 44.278      | 0           | 0            |
| 86.005    | 8           | 44.278      | 0           | 0            |
| 130.098   | 8           | 17.009      | 0           | 0            |
| 151.788   | 8           | 17.009      | 0           | 0            |
| 174.768   | 8           | 17.009      | 0           | 0            |
| 174.768   | 8           | 17.009      | 0           | 0            |
| 127.287   | 8           | 23.523      | 0           | 0            |
| 151.788   | 8           | 17.009      | 0           | 0            |
| 78.501    | 8           | 16.144      | 0           | 0            |
| 174.768   | 8           | 17.009      | 0           | 0            |
| 78.501    | 8           | 16.144      | 0           | 0            |
| 174.768   | 8           | 17.009      | 0           | 0            |
| 140.78    | 8           | 17.009      | 0           | 0            |
| 64.298    | 8           | 20.167      | 0           | 0            |
| 140.78    | 8           | 17.009      | 0           | 0            |
| 57.616    | 8           | 16.144      | 0           | 0            |
| 109.721   | 8           | 17.009      | 0           | 0            |
| 109.721   | 8           | 17.009      | 0           | 0            |
| 119.743   | 8           | 17.009      | 0           | 0            |
| 130.098   | 8           | 17.009      | 0           | 0            |
| 78.501    | 8           | 23.523      | 0           | 0            |
| 174.768   | 8           | 44.278      | 0           | 0            |
| 64.298    | 8           | 20.167      | 0           | 0            |
| 119.743   | 8           | 17.009      | 0           | 0            |
| 100.037   | 8           | 17.009      | 0           | 0            |
| 64.298    | 8           | 16.144      | 0           | 0            |
| 90.697    | 8           | 17.009      | 0           | 0            |

|         |    |        |   |   |
|---------|----|--------|---|---|
| 73.082  | 8  | 17.009 | 0 | 0 |
| 73.082  | 8  | 30.835 | 0 | 0 |
| 100.037 | 8  | 17.009 | 0 | 0 |
| 100.037 | 8  | 30.835 | 0 | 0 |
| 109.721 | 8  | 17.009 | 0 | 0 |
| 49.483  | 8  | 17.009 | 0 | 0 |
| 73.082  | 8  | 17.009 | 0 | 0 |
| 42.426  | 8  | 17.009 | 0 | 0 |
| 64.827  | 8  | 44.278 | 0 | 0 |
| 56.956  | 8  | 17.009 | 0 | 0 |
| 81.709  | 8  | 17.009 | 0 | 0 |
| 35.803  | 8  | 20.167 | 0 | 0 |
| 56.956  | 8  | 20.167 | 0 | 0 |
| 29.638  | 8  | 17.009 | 0 | 0 |
| 42.426  | 8  | 26.927 | 0 | 0 |
| 42.426  | 8  | 20.167 | 0 | 0 |
| 64.827  | 8  | 17.009 | 0 | 0 |
| 109.721 | 12 | 44.278 | 0 | 0 |
| 73.082  | 12 | 17.009 | 0 | 0 |
| 81.709  | 12 | 20.167 | 0 | 0 |
| 64.827  | 12 | 17.009 | 0 | 0 |
| 81.709  | 12 | 17.009 | 0 | 0 |
| 119.743 | 12 | 31.275 | 0 | 0 |
| 109.721 | 12 | 17.009 | 0 | 0 |
| 56.956  | 14 | 17.009 | 0 | 0 |
| 23.956  | 10 | 31.275 | 0 | 0 |
| 49.483  | 8  | 17.009 | 0 | 0 |
| 35.803  | 8  | 20.167 | 0 | 0 |
| 18.789  | 8  | 17.009 | 0 | 0 |
| 29.638  | 8  | 17.009 | 0 | 0 |
| 29.638  | 3  | 17.25  | 0 | 0 |
| 73.082  | 8  | 17.009 | 0 | 0 |
| 90.697  | 8  | 17.009 | 0 | 0 |
| 18.789  | 8  | 17.009 | 0 | 0 |
| 86.005  | 8  | 23.523 | 0 | 0 |
| 100.577 | 3  | 15.381 | 0 | 0 |
| 127.287 | 8  | 59.298 | 0 | 0 |
| 51.225  | 8  | 20.167 | 0 | 0 |
| 163.117 | 8  | 17.009 | 0 | 0 |
| 140.78  | 8  | 17.009 | 0 | 0 |
| 186.739 | 8  | 17.009 | 0 | 0 |
| 140.78  | 8  | 17.009 | 0 | 0 |
| 140.78  | 8  | 17.009 | 0 | 0 |
| 163.117 | 8  | 17.009 | 0 | 0 |
| 163.117 | 8  | 17.009 | 0 | 0 |
| 151.788 | 8  | 17.009 | 0 | 0 |
| 151.788 | 8  | 30.835 | 0 | 0 |

|         |    |        |   |   |
|---------|----|--------|---|---|
| 163.117 | 8  | 17.009 | 0 | 0 |
| 163.117 | 8  | 30.835 | 0 | 0 |
| 174.768 | 8  | 17.009 | 0 | 0 |
| 151.788 | 8  | 17.009 | 0 | 0 |
| 93.768  | 8  | 31.275 | 0 | 0 |
| 151.788 | 8  | 17.009 | 0 | 0 |
| 163.117 | 8  | 17.009 | 0 | 0 |
| 118.547 | 8  | 23.523 | 0 | 0 |
| 49.483  | 12 | 31.275 | 0 | 0 |
| 130.098 | 8  | 17.009 | 0 | 0 |
| 174.768 | 8  | 17.009 | 0 | 0 |
| 64.298  | 8  | 31.275 | 0 | 0 |
| 109.721 | 8  | 44.278 | 0 | 0 |
| 140.78  | 8  | 17.009 | 0 | 0 |
| 130.098 | 8  | 17.009 | 0 | 0 |
| 140.78  | 8  | 17.009 | 0 | 0 |
| 71.263  | 8  | 31.275 | 0 | 0 |
| 130.098 | 8  | 17.009 | 0 | 0 |
| 78.501  | 8  | 44.278 | 0 | 0 |
| 119.743 | 8  | 17.009 | 0 | 0 |
| 119.743 | 8  | 30.835 | 0 | 0 |
| 119.743 | 8  | 17.009 | 0 | 0 |
| 90.697  | 12 | 17.009 | 0 | 0 |
| 64.298  | 8  | 31.275 | 0 | 0 |
| 100.037 | 8  | 17.009 | 0 | 0 |
| 71.263  | 8  | 20.167 | 0 | 0 |
| 51.225  | 8  | 20.167 | 0 | 0 |
| 90.697  | 8  | 30.835 | 0 | 0 |
| 71.263  | 8  | 16.144 | 0 | 0 |
| 151.788 | 8  | 17.009 | 0 | 0 |
| 100.037 | 8  | 31.275 | 0 | 0 |
| 71.263  | 8  | 16.144 | 0 | 0 |
| 81.709  | 8  | 17.009 | 0 | 0 |
| 45.138  | 8  | 20.167 | 0 | 0 |
| 117.86  | 16 | 17.009 | 0 | 0 |
| 64.298  | 8  | 31.275 | 0 | 0 |
| 100.037 | 12 | 44.278 | 0 | 0 |
| 64.298  | 8  | 16.144 | 0 | 0 |
| 101.783 | 8  | 31.935 | 0 | 0 |
| 64.827  | 8  | 20.167 | 0 | 0 |
| 56.956  | 12 | 17.009 | 0 | 0 |
| 56.819  | 3  | 14.966 | 0 | 0 |
| 130.098 | 8  | 17.009 | 0 | 0 |
| 119.743 | 8  | 17.009 | 0 | 0 |
| 64.827  | 8  | 17.009 | 0 | 0 |
| 73.082  | 8  | 17.009 | 0 | 0 |
| 38.756  | 3  | 14.966 | 0 | 0 |

|         |    |        |   |   |
|---------|----|--------|---|---|
| 100.037 | 8  | 17.009 | 0 | 0 |
| 64.827  | 8  | 17.009 | 0 | 0 |
| 49.483  | 8  | 17.009 | 0 | 0 |
| 57.616  | 8  | 36.556 | 0 | 0 |
| 44.468  | 3  | 14.966 | 0 | 0 |
| 73.082  | 8  | 17.009 | 0 | 0 |
| 64.827  | 8  | 17.009 | 0 | 0 |
| 35.803  | 8  | 17.009 | 0 | 0 |
| 56.956  | 12 | 17.009 | 0 | 0 |
| 42.426  | 8  | 17.009 | 0 | 0 |
| 35.803  | 8  | 20.167 | 0 | 0 |
| 42.426  | 8  | 23.624 | 0 | 0 |
| 42.426  | 8  | 17.009 | 0 | 0 |
| 42.426  | 12 | 20.167 | 0 | 0 |
| 49.483  | 8  | 17.009 | 0 | 0 |
| 42.426  | 3  | 43.066 | 0 | 0 |
| 56.956  | 8  | 17.009 | 0 | 0 |
| 29.638  | 8  | 17.009 | 0 | 0 |
| 35.803  | 10 | 17.009 | 0 | 0 |
| 56.956  | 12 | 17.009 | 0 | 0 |
| 119.743 | 12 | 17.009 | 0 | 0 |
| 100.037 | 12 | 30.835 | 0 | 0 |
| 130.098 | 14 | 17.009 | 0 | 0 |
| 119.743 | 12 | 17.009 | 0 | 0 |
| 119.743 | 12 | 17.009 | 0 | 0 |
| 109.721 | 14 | 17.009 | 0 | 0 |
| 119.743 | 14 | 17.009 | 0 | 0 |
| 90.697  | 14 | 17.009 | 0 | 0 |
| 100.037 | 14 | 17.009 | 0 | 0 |
| 73.082  | 14 | 17.009 | 0 | 0 |
| 64.827  | 14 | 17.009 | 0 | 0 |
| 15.401  | 3  | 29.534 | 0 | 0 |
| 38.756  | 3  | 14.966 | 0 | 0 |
| 18.789  | 3  | 13.208 | 0 | 0 |
| 23.636  | 1  | 14.966 | 0 | 0 |
| 100.037 | 14 | 30.835 | 0 | 0 |
| 199.03  | 12 | 30.835 | 0 | 0 |
| 140.78  | 10 | 17.009 | 0 | 0 |
| 163.117 | 14 | 17.009 | 0 | 0 |
| 109.721 | 12 | 17.009 | 0 | 0 |
| 81.709  | 12 | 17.009 | 0 | 0 |
| 109.721 | 12 | 17.009 | 0 | 0 |
| 23.215  | 3  | 16.198 | 0 | 0 |
| 89.189  | 16 | 17.009 | 0 | 0 |
| 81.709  | 12 | 17.009 | 0 | 0 |
| 109.721 | 12 | 17.009 | 0 | 0 |
| 119.743 | 12 | 17.009 | 0 | 0 |

|         |    |        |   |   |
|---------|----|--------|---|---|
| 64.827  | 12 | 17.009 | 0 | 0 |
| 28.986  | 16 | 17.009 | 0 | 0 |
| 64.827  | 14 | 17.009 | 0 | 0 |
| 42.426  | 3  | 20.985 | 0 | 0 |
| 196.114 | 8  | 1000   | 0 | 0 |
| 221.315 | 8  | 1000   | 0 | 0 |
| 172.572 | 8  | 1000   | 0 | 0 |
| 208.556 | 8  | 1000   | 0 | 0 |
| 221.315 | 8  | 1000   | 0 | 0 |
| 143.877 | 8  | 1000   | 0 | 0 |
| 208.556 | 8  | 1000   | 0 | 0 |
| 221.315 | 8  | 1000   | 0 | 0 |
| 208.556 | 8  | 1000   | 0 | 0 |
| 208.556 | 8  | 1000   | 0 | 0 |
| 203.201 | 8  | 1000   | 0 | 0 |
| 100.577 | 8  | 1000   | 0 | 0 |
| 117.196 | 8  | 1000   | 0 | 0 |
| 208.556 | 8  | 1000   | 0 | 0 |
| 172.572 | 8  | 1000   | 0 | 0 |
| 221.315 | 8  | 1000   | 0 | 0 |
| 196.114 | 8  | 1000   | 0 | 0 |
| 134.755 | 8  | 1000   | 0 | 0 |
| 182.57  | 8  | 1000   | 0 | 0 |
| 208.556 | 8  | 1000   | 0 | 0 |
| 196.114 | 8  | 1000   | 0 | 0 |
| 203.201 | 8  | 1000   | 0 | 0 |
| 208.556 | 8  | 1000   | 0 | 0 |
| 172.572 | 8  | 1000   | 0 | 0 |
| 153.223 | 8  | 1000   | 0 | 0 |
| 125.86  | 8  | 1000   | 0 | 0 |
| 134.755 | 8  | 1000   | 0 | 0 |
| 183.987 | 8  | 1000   | 0 | 0 |
| 192.78  | 8  | 1000   | 0 | 0 |
| 183.987 | 8  | 1000   | 0 | 0 |
| 182.57  | 8  | 1000   | 0 | 0 |
| 182.57  | 8  | 1000   | 0 | 0 |
| 196.114 | 8  | 1000   | 0 | 0 |
| 196.114 | 8  | 1000   | 0 | 0 |
| 224.668 | 8  | 1000   | 0 | 0 |
| 100.577 | 8  | 1000   | 0 | 0 |
| 143.877 | 8  | 1000   | 0 | 0 |
| 172.173 | 8  | 1000   | 0 | 0 |
| 107.966 | 8  | 1000   | 0 | 0 |
| 183.987 | 8  | 1000   | 0 | 0 |
| 138.626 | 8  | 1000   | 0 | 0 |
| 172.173 | 8  | 1000   | 0 | 0 |
| 172.572 | 8  | 1000   | 0 | 0 |



|         |   |      |   |   |
|---------|---|------|---|---|
| 208.556 | 8 | 1000 | 0 | 0 |
| 117.196 | 8 | 1000 | 0 | 0 |
| 100.577 | 8 | 1000 | 0 | 0 |
| 138.626 | 8 | 1000 | 0 | 0 |
| 92.633  | 8 | 1000 | 0 | 0 |
| 153.223 | 8 | 1000 | 0 | 0 |
| 160.675 | 8 | 1000 | 0 | 0 |
| 77.505  | 8 | 1000 | 0 | 0 |
| 192.78  | 8 | 1000 | 0 | 0 |
| 98.407  | 8 | 1000 | 0 | 0 |
| 149.492 | 8 | 1000 | 0 | 0 |
| 183.987 | 8 | 1000 | 0 | 0 |
| 117.196 | 8 | 1000 | 0 | 0 |
| 172.173 | 8 | 1000 | 0 | 0 |
| 56.819  | 8 | 1000 | 0 | 0 |
| 108.766 | 8 | 1000 | 0 | 0 |
| 63.436  | 8 | 1000 | 0 | 0 |
| 50.493  | 8 | 1000 | 0 | 0 |
| 149.492 | 8 | 1000 | 0 | 0 |
| 117.196 | 8 | 1000 | 0 | 0 |
| 70.334  | 8 | 1000 | 0 | 0 |
| 107.966 | 8 | 1000 | 0 | 0 |
| 138.626 | 8 | 1000 | 0 | 0 |
| 108.766 | 8 | 1000 | 0 | 0 |
| 117.86  | 8 | 1000 | 0 | 0 |
| 92.633  | 8 | 1000 | 0 | 0 |
| 117.86  | 8 | 1000 | 0 | 0 |
| 117.86  | 8 | 1000 | 0 | 0 |
| 70.334  | 8 | 1000 | 0 | 0 |
| 117.86  | 8 | 1000 | 0 | 0 |
| 160.675 | 8 | 1000 | 0 | 0 |
| 56.819  | 8 | 1000 | 0 | 0 |
| 70.334  | 8 | 1000 | 0 | 0 |
| 80.318  | 8 | 1000 | 0 | 0 |
| 117.86  | 8 | 1000 | 0 | 0 |
| 50.493  | 8 | 1000 | 0 | 0 |
| 89.189  | 8 | 1000 | 0 | 0 |
| 63.436  | 8 | 1000 | 0 | 0 |
| 63.436  | 8 | 1000 | 0 | 0 |
| 33.37   | 8 | 1000 | 0 | 0 |
| 56.819  | 8 | 1000 | 0 | 0 |
| 107.966 | 8 | 1000 | 0 | 0 |
| 84.94   | 8 | 1000 | 0 | 0 |
| 128.081 | 8 | 1000 | 0 | 0 |
| 98.407  | 8 | 1000 | 0 | 0 |
| 33.37   | 8 | 1000 | 0 | 0 |
| 100.577 | 8 | 1000 | 0 | 0 |

|         |   |      |   |   |
|---------|---|------|---|---|
| 56.819  | 8 | 1000 | 0 | 0 |
| 80.318  | 8 | 1000 | 0 | 0 |
| 98.407  | 8 | 1000 | 0 | 0 |
| 48.532  | 8 | 1000 | 0 | 0 |
| 80.318  | 8 | 1000 | 0 | 0 |
| 56.819  | 8 | 1000 | 0 | 0 |
| 98.407  | 8 | 1000 | 0 | 0 |
| 44.468  | 8 | 1000 | 0 | 0 |
| 71.806  | 8 | 1000 | 0 | 0 |
| 98.407  | 8 | 1000 | 0 | 0 |
| 33.37   | 8 | 1000 | 0 | 0 |
| 80.318  | 8 | 1000 | 0 | 0 |
| 28.325  | 8 | 1000 | 0 | 0 |
| 98.407  | 8 | 1000 | 0 | 0 |
| 18.321  | 8 | 1000 | 0 | 0 |
| 55.899  | 8 | 1000 | 0 | 0 |
| 28.986  | 8 | 1000 | 0 | 0 |
| 48.532  | 8 | 1000 | 0 | 0 |
| 77.505  | 8 | 1000 | 0 | 0 |
| 55.899  | 8 | 1000 | 0 | 0 |
| 55.899  | 8 | 1000 | 0 | 0 |
| 71.806  | 8 | 1000 | 0 | 0 |
| 48.532  | 8 | 1000 | 0 | 0 |
| 35.054  | 8 | 1000 | 0 | 0 |
| 23.398  | 8 | 1000 | 0 | 0 |
| 48.532  | 8 | 1000 | 0 | 0 |
| 41.577  | 8 | 1000 | 0 | 0 |
| 55.899  | 8 | 1000 | 0 | 0 |
| 9.847   | 8 | 1000 | 0 | 0 |
| 13.791  | 8 | 1000 | 0 | 0 |
| 89.189  | 8 | 1000 | 0 | 0 |
| 23.398  | 8 | 1000 | 0 | 0 |
| 56.819  | 8 | 1000 | 0 | 0 |
| 23.398  | 8 | 1000 | 0 | 0 |
| 35.054  | 8 | 1000 | 0 | 0 |
| 63.662  | 8 | 1000 | 0 | 0 |
| 13.791  | 8 | 1000 | 0 | 0 |
| 33.37   | 8 | 1000 | 0 | 0 |
| 55.899  | 8 | 1000 | 0 | 0 |
| 23.398  | 8 | 1000 | 0 | 0 |
| 208.556 | 8 | 1000 | 0 | 0 |
| 196.114 | 8 | 1000 | 0 | 0 |
| 143.877 | 8 | 1000 | 0 | 0 |
| 221.315 | 8 | 1000 | 0 | 0 |
| 196.114 | 8 | 1000 | 0 | 0 |
| 162.789 | 8 | 1000 | 0 | 0 |
| 143.877 | 8 | 1000 | 0 | 0 |

|         |   |      |   |   |
|---------|---|------|---|---|
| 235.712 | 8 | 1000 | 0 | 0 |
| 134.755 | 8 | 1000 | 0 | 0 |
| 134.755 | 8 | 1000 | 0 | 0 |
| 196.114 | 8 | 1000 | 0 | 0 |
| 208.556 | 8 | 1000 | 0 | 0 |
| 183.987 | 8 | 1000 | 0 | 0 |
| 182.57  | 8 | 1000 | 0 | 0 |
| 221.315 | 8 | 1000 | 0 | 0 |
| 221.315 | 8 | 1000 | 0 | 0 |
| 247.791 | 8 | 1000 | 0 | 0 |
| 196.114 | 8 | 1000 | 0 | 0 |
| 196.114 | 8 | 1000 | 0 | 0 |
| 192.78  | 8 | 1000 | 0 | 0 |
| 208.556 | 8 | 1000 | 0 | 0 |
| 183.987 | 8 | 1000 | 0 | 0 |
| 108.766 | 8 | 1000 | 0 | 0 |
| 183.987 | 8 | 1000 | 0 | 0 |
| 172.572 | 8 | 1000 | 0 | 0 |
| 203.201 | 8 | 1000 | 0 | 0 |
| 221.315 | 8 | 1000 | 0 | 0 |
| 92.633  | 8 | 1000 | 0 | 0 |
| 182.57  | 8 | 1000 | 0 | 0 |
| 192.78  | 8 | 1000 | 0 | 0 |
| 208.556 | 8 | 1000 | 0 | 0 |
| 196.114 | 8 | 1000 | 0 | 0 |
| 192.78  | 8 | 1000 | 0 | 0 |
| 153.223 | 8 | 1000 | 0 | 0 |
| 160.675 | 8 | 1000 | 0 | 0 |
| 203.201 | 8 | 1000 | 0 | 0 |
| 172.572 | 8 | 1000 | 0 | 0 |
| 203.201 | 8 | 1000 | 0 | 0 |
| 203.201 | 8 | 1000 | 0 | 0 |
| 221.315 | 8 | 1000 | 0 | 0 |
| 117.196 | 8 | 1000 | 0 | 0 |
| 183.987 | 8 | 1000 | 0 | 0 |
| 143.877 | 8 | 1000 | 0 | 0 |
| 134.755 | 8 | 1000 | 0 | 0 |
| 196.114 | 8 | 1000 | 0 | 0 |
| 92.633  | 8 | 1000 | 0 | 0 |
| 70.334  | 8 | 1000 | 0 | 0 |
| 117.86  | 8 | 1000 | 0 | 0 |
| 70.334  | 8 | 1000 | 0 | 0 |
| 196.114 | 8 | 1000 | 0 | 0 |
| 125.86  | 8 | 1000 | 0 | 0 |
| 107.966 | 8 | 1000 | 0 | 0 |
| 117.86  | 8 | 1000 | 0 | 0 |
| 117.196 | 8 | 1000 | 0 | 0 |

|         |   |      |   |   |
|---------|---|------|---|---|
| 84.94   | 8 | 1000 | 0 | 0 |
| 56.819  | 8 | 1000 | 0 | 0 |
| 183.987 | 8 | 1000 | 0 | 0 |
| 100.577 | 8 | 1000 | 0 | 0 |
| 149.492 | 8 | 1000 | 0 | 0 |
| 128.081 | 8 | 1000 | 0 | 0 |
| 172.572 | 8 | 1000 | 0 | 0 |
| 117.196 | 8 | 1000 | 0 | 0 |
| 172.173 | 8 | 1000 | 0 | 0 |
| 117.86  | 8 | 1000 | 0 | 0 |
| 138.626 | 8 | 1000 | 0 | 0 |
| 98.407  | 8 | 1000 | 0 | 0 |
| 107.966 | 8 | 1000 | 0 | 0 |
| 138.626 | 8 | 1000 | 0 | 0 |
| 107.966 | 8 | 1000 | 0 | 0 |
| 128.081 | 8 | 1000 | 0 | 0 |
| 28.325  | 8 | 1000 | 0 | 0 |
| 98.407  | 8 | 1000 | 0 | 0 |
| 98.407  | 8 | 1000 | 0 | 0 |
| 63.436  | 8 | 1000 | 0 | 0 |
| 149.492 | 8 | 1000 | 0 | 0 |
| 89.189  | 8 | 1000 | 0 | 0 |
| 55.899  | 8 | 1000 | 0 | 0 |
| 89.189  | 8 | 1000 | 0 | 0 |
| 80.318  | 8 | 1000 | 0 | 0 |
| 50.493  | 8 | 1000 | 0 | 0 |
| 63.662  | 8 | 1000 | 0 | 0 |
| 100.577 | 8 | 1000 | 0 | 0 |
| 89.189  | 8 | 1000 | 0 | 0 |
| 63.662  | 8 | 1000 | 0 | 0 |
| 71.806  | 8 | 1000 | 0 | 0 |
| 63.662  | 8 | 1000 | 0 | 0 |
| 80.318  | 8 | 1000 | 0 | 0 |
| 33.37   | 8 | 1000 | 0 | 0 |
| 55.899  | 8 | 1000 | 0 | 0 |
| 35.054  | 8 | 1000 | 0 | 0 |
| 50.493  | 8 | 1000 | 0 | 0 |
| 48.532  | 8 | 1000 | 0 | 0 |
| 13.791  | 8 | 1000 | 0 | 0 |
| 28.986  | 8 | 1000 | 0 | 0 |
| 28.986  | 8 | 1000 | 0 | 0 |
| 35.054  | 8 | 1000 | 0 | 0 |
| 28.986  | 8 | 1000 | 0 | 0 |
| 48.532  | 8 | 1000 | 0 | 0 |
| 28.325  | 8 | 1000 | 0 | 0 |
| 23.636  | 8 | 1000 | 0 | 0 |
| 28.986  | 8 | 1000 | 0 | 0 |

|        |   |      |   |   |
|--------|---|------|---|---|
| 23.398 | 8 | 1000 | 0 | 0 |
| 9.847  | 8 | 1000 | 0 | 0 |

## Supplementary Table 4: Mapping of cyclin E-CDK2-dependent phosphosites or

### Phosphorylation analysis of Oct4 using LC-MS/MS

| ScanF | z | XCorr | Delta Corr | # Ions Matched | Total Ions | Reference |
|-------|---|-------|------------|----------------|------------|-----------|
| 33419 | 2 | 3.284 | 0.096      | 25             | 32         | sp Q01860 |
| 33447 | 3 | 2.582 | 0.142      | 34             | 64         | sp Q01860 |
| 33923 | 2 | 3.064 | 0.174      | 23             | 32         | sp Q01860 |
| 33950 | 3 | 3.093 | 0.109      | 34             | 64         | sp Q01860 |
| 34430 | 2 | 3.793 | 0.13       | 23             | 32         | sp Q01860 |
| 35515 | 3 | 2.721 | 0.286      | 27             | 64         | sp Q01860 |
| 36008 | 2 | 1.717 | 0.075      | 13             | 32         | sp Q01860 |
| 35629 | 2 | 1.061 | 0.226      | 11             | 32         | sp Q01860 |
| 36112 | 2 | 2.897 | 0.208      | 22             | 32         | sp Q01860 |
| 36260 | 3 | 3.207 | 0.141      | 26             | 64         | sp Q01860 |
| 36622 | 2 | 2.591 | 0.23       | 17             | 32         | sp Q01860 |
| 33494 | 3 | 1.967 | 0.072      | 22             | 72         | sp Q01860 |
| 34426 | 2 | 3.341 | 0.128      | 21             | 36         | sp Q01860 |
| 35028 | 3 | 2.622 | 0.103      | 26             | 72         | sp Q01860 |
| 40123 | 2 | 1.902 | 0.766      | 13             | 22         | sp Q01860 |
| 40936 | 2 | 2.319 | 0.623      | 18             | 22         | sp Q01860 |
| 41027 | 1 | 1.599 | 0.339      | 14             | 22         | sp Q01860 |
| 41902 | 2 | 2.505 | 0.736      | 17             | 22         | sp Q01860 |
| 41926 | 1 | 1.15  | 0.01       | 11             | 22         | sp Q01860 |
| 42416 | 2 | 2.673 | 0.556      | 16             | 22         | sp Q01860 |
| 42670 | 2 | 2.305 | 0.723      | 18             | 22         | sp Q01860 |
| 42719 | 1 | 1.555 | 0.178      | 11             | 22         | sp Q01860 |
| 44176 | 2 | 1.806 | 0.74       | 14             | 22         | sp Q01860 |
| 45022 | 2 | 1.959 | 0.664      | 16             | 22         | sp Q01860 |
| 46248 | 2 | 1.972 | 0.781      | 13             | 22         | sp Q01860 |
| 50730 | 2 | 1.757 | 0.392      | 11             | 22         | sp Q01860 |
| 53477 | 2 | 1.566 | 0.986      | 10             | 22         | sp Q01860 |
| 54370 | 2 | 2.008 | 0.797      | 14             | 22         | sp Q01860 |
| 35654 | 2 | 1.611 | 0.859      | 12             | 22         | sp Q01860 |
| 36192 | 2 | 2.179 | 0.658      | 18             | 22         | sp Q01860 |
| 36735 | 2 | 1.98  | 0.777      | 15             | 22         | sp Q01860 |
| 37344 | 2 | 1.534 | 0.714      | 10             | 22         | sp Q01860 |
| 38046 | 2 | 1.057 | 0.866      | 10             | 22         | sp Q01860 |
| 57669 | 2 | 4.248 | 0.225      | 20             | 44         | sp Q01860 |
| 57707 | 3 | 2.855 | 0.138      | 26             | 88         | sp Q01860 |
| 48274 | 2 | 2.123 | 0.511      | 10             | 38         | sp Q01860 |

1 Nanog, Oct4 and Sox2.

| Peptide                      | Gene Syml | ModScore | Max Score | Site 1 Posi | Site 1 Prot |
|------------------------------|-----------|----------|-----------|-------------|-------------|
| E.AFPPVSVTTLGS#PM*HSN.-      | E.AFPPVSV | 186.739  |           | 12          | 355         |
| E.AFPPVSVTTLGS#PM*HSN.-      | E.AFPPVSV | 154.883  |           | 12          | 355         |
| E.AFPPVSVTTLGS#PM*HSN.-      | E.AFPPVSV | 174.768  |           | 12          | 355         |
| E.AFPPVSVTTLGS#PM*HSN.-      | E.AFPPVSV | 127.287  |           | 12          | 355         |
| E.AFPPVSVTTLGS#PM*HSN.-      | E.AFPPVSV | 186.739  |           | 12          | 355         |
| E.AFPPVSVTTLGS#PM*HSN.-      | E.AFPPVSV | 101.783  |           | 12          | 355         |
| E.AFPPVSVTTLGS#PM*HSN.-      | E.AFPPVSV | 42.426   |           | 12          | 355         |
| E.AFPPVSVTTLGS#PMHSN.-       | E.AFPPVSV | 28.986   |           | 12          | 355         |
| E.AFPPVSVTTLGS#PMHSN.-       | E.AFPPVSV | 172.173  |           | 12          | 355         |
| E.AFPPVSVTTLGS#PMHSN.-       | E.AFPPVSV | 92.633   |           | 12          | 355         |
| E.AFPPVSVTTLGS#PMHSN.-       | E.AFPPVSV | 138.626  |           | 12          | 355         |
| E.GEAFPPVSVTTLGS#PM*HSN.-    | E.GEAFPPV | 63.447   |           | 14          | 355         |
| E.GEAFPPVSVTTLGS#PM*HSN.-    | E.GEAFPPV | 109.145  |           | 14          | 355         |
| E.GEAFPPVSVTTLGS#PM*HSN.-    | E.GEAFPPV | 29.333   |           | 14          | 355         |
| S.DFAFS#PPPGGGG.D            | S.DFAFS#P | 69.276   |           | 5           | 12          |
| S.DFAFS#PPPGGGG.D            | S.DFAFS#P | 134.26   |           | 5           | 12          |
| S.DFAFS#PPPGGGG.D            | S.DFAFS#P | 68.033   |           | 5           | 12          |
| S.DFAFS#PPPGGGG.D            | S.DFAFS#P | 122.281  |           | 5           | 12          |
| S.DFAFS#PPPGGGG.D            | S.DFAFS#P | 44.973   |           | 5           | 12          |
| S.DFAFS#PPPGGGG.D            | S.DFAFS#P | 60.102   |           | 5           | 12          |
| S.DFAFS#PPPGGGG.D            | S.DFAFS#P | 99.688   |           | 5           | 12          |
| S.DFAFS#PPPGGGG.D            | S.DFAFS#P | 44.973   |           | 5           | 12          |
| S.DFAFS#PPPGGGG.D            | S.DFAFS#P | 78.939   |           | 5           | 12          |
| S.DFAFS#PPPGGGG.D            | S.DFAFS#P | 78.939   |           | 5           | 12          |
| S.DFAFS#PPPGGGG.D            | S.DFAFS#P | 22.329   |           | 5           | 12          |
| S.DFAFS#PPPGGGG.D            | S.DFAFS#P | 22.329   |           | 5           | 12          |
| S.DFAFS#PPPGGGG.D            | S.DFAFS#P | 60.102   |           | 5           | 12          |
| S.DFAFS#PPPGGGG.D            | S.DFAFS#P | 78.939   |           | 5           | 12          |
| S.DFAFS#PPPGGGG.D            | S.DFAFS#P | 78.939   |           | 5           | 12          |
| S.DFAFS#PPPGGGG.D            | S.DFAFS#P | 134.26   |           | 5           | 12          |
| S.DFAFS#PPPGGGG.D            | S.DFAFS#P | 78.939   |           | 5           | 12          |
| S.DFAFS#PPPGGGG.D            | S.DFAFS#P | 51.436   |           | 5           | 12          |
| S.DFAFS#PPPGGGG.D            | S.DFAFS#P | 51.436   |           | 5           | 12          |
| S.DFAFS#PPPGGGGDGPGGPEPGWV.D | S.DFAFS#P | 104.939  |           | 5           | 12          |
| S.DFAFS#PPPGGGGDGPGGPEPGWV.D | S.DFAFS#P | 71.143   |           | 5           | 12          |
| F.SGGPVSFPLAPGPHFGT#PGY.G    | F.SGGPVSF | 41.743   |           | 17          | 322         |

**Site 1 Score**

48.315

28.529

48.315

19.846

34.073

28.529

13.38

24.243

53.534

19.846

34.073

13.208

20.167

13.208

1000

1000

1000

1000

1000

1000

1000

1000

1000

1000

1000

1000

1000

1000

1000

1000

1000

1000

1000

1000

1000

20.625



#### Supplementary Table 4: Mapping of cyclin E-CDK2-dependent phosphosites on Nanog, Oct4 and

|                                |                                                                                     |
|--------------------------------|-------------------------------------------------------------------------------------|
| <b>ScanF</b>                   | Mass spectra scan number                                                            |
| <b>z</b>                       | Charge state                                                                        |
| <b>XCorr</b>                   | Sequest peptide score                                                               |
| <b>Delta Corr</b>              | Delta correlation ( difference between Xcorr for peptide 1 and next peptide wit     |
| <b># Ions matched</b>          | Number of ions matched from total number of ions for a given peptide                |
| <b>Total</b>                   | Total number ions theoretically possible                                            |
| <b>Reference</b>               | Gene reference from Uniprot database                                                |
| <b>Peptide</b>                 | Peptide sequence                                                                    |
| <b>ModScore Peptide</b>        | Peptide with localised phosphorylation site localized (site indicated by a # sign   |
| <b>Max Score</b>               | Maximum Modscore to indicate the maximum score for a given peptide                  |
| <b>Site 1 Position</b>         | Position of phosphorylation site in the peptide sequence for first site             |
| <b>Site 1 Protein Position</b> | Positon in protein sequence for site 1                                              |
| <b>Site 1 Score</b>            | Score for the localisation of the phosphorylation site for the first site in the se |
| <b>Site 2 Protein Position</b> | Positon in protein sequence for site 2                                              |
| <b>Site 2 Position</b>         | Position of phosphorylation site in the peptide sequence for second site (if ap     |
| <b>Site 2 Score</b>            | Score for the localisation of the phosphorylation site for the second site in the   |

**1 Sox2.**

:h different peptide sequence)

1)

quence

plicable)

: sequence (if applicable)

**Supplementary Table 5: Statistics source date**

| <b>Figure 1b</b> |       | (x100,000) | (x100,000) | (x100,000) |
|------------------|-------|------------|------------|------------|
| Ctrl             | Day 1 | 1.64       | 1.62       | 1.47       |
|                  | Day 2 | 5.19       | 4.94       | 4.28       |
|                  | Day 3 | 14         | 13.18      | 11.25      |
|                  | Day 4 | 23.3       | 26.6       | 21.7       |
|                  | Day 5 | 32.7       | 28.5       | 32.7       |
| Q-KO             | Day 1 | 1.43       | 1.53       | 1.53       |
|                  | Day 2 | 2.96       | 3.08       | 3.32       |
|                  | Day 3 | 6.62       | 8.8        | 8.5        |
|                  | Day 4 | 15.4       | 16.2       | 17.6       |
|                  | Day 5 | 18.9       | 20.8       | 22.8       |

| <b>Figure 1d</b> |      |      |      |      |      |
|------------------|------|------|------|------|------|
| Ctrl             | G1   | 14.7 | 16.4 | 14.1 | 15   |
|                  | S    | 76.8 | 73.1 | 76   | 76.9 |
|                  | G2/M | 8.5  | 10.5 | 9.9  | 8.1  |
| Q-KO             | G1   | 42.9 | 44.1 | 41.1 | 47.4 |
|                  | S    | 47.5 | 47.4 | 44.6 | 39.5 |
|                  | G2/M | 9.6  | 8.5  | 14.3 | 13.1 |

| <b>Figure 1e</b> |      |     |     |     |
|------------------|------|-----|-----|-----|
| Ctrl             | G1   | 3   | 3.5 | 2.5 |
|                  | S    | 6   | 6.5 | 6   |
|                  | G2/M | 2.5 | 2.5 | 2.5 |
| Q-KO             | G1   | 6   | 6   | 7   |
|                  | S    | 6   | 6   | 6   |
|                  | G2/M | 3.5 | 2.5 | 2   |

| <b>Figure 2b</b> |       |        |        |        |
|------------------|-------|--------|--------|--------|
| Ctrl             | Day 1 | 29750  | 35650  | 38750  |
|                  | Day 3 | 76325  | 77000  | 81775  |
|                  | Day 5 | 128790 | 130230 | 125280 |
|                  | Day 7 | 131910 | 138690 | 122880 |
| Q-KO             | Day 1 | 24824  | 29150  | 33225  |
|                  | Day 3 | 35925  | 34750  | 35400  |
|                  | Day 5 | 31140  | 29550  | 28650  |
|                  | Day 7 | 33000  | 33840  | 25230  |

**Figure 2c**

|      |       |       |       |
|------|-------|-------|-------|
| Ctrl | 10678 | 10020 | 11473 |
| Q-KO | 490   | 425   | 504   |

**Figure 2e**

|      |      |      |      |      |
|------|------|------|------|------|
| Ctrl | G1   | 67   | 66.5 | 66.8 |
|      | S    | 10.1 | 16   | 13   |
|      | G2/M | 22.9 | 17.5 | 20.2 |
| Q-KO | G1   | 86.1 | 77.5 | 81.9 |
|      | S    | 2.9  | 3    | 2.9  |
|      | G2/M | 11   | 19.5 | 15.2 |

**Figure 3b**

|       | Undifferentia | Mixed (%)  | Differentiated (%) |
|-------|---------------|------------|--------------------|
| Ctrl1 | 87.1657754    | 9.09090909 | 3.74331551         |
|       | 88.8888889    | 8.1871345  | 2.92397661         |
|       | 85.3773585    | 9.90566038 | 4.71698113         |
| Ctrl2 | 86.1413043    | 10.326087  | 3.5326087          |
|       | 86.1702128    | 10.106383  | 3.72340426         |
|       | 84.9372385    | 10.460251  | 4.60251046         |
| Ctrl3 | 88.4792627    | 9.44700461 | 2.07373272         |
|       | 86.6666667    | 10.877193  | 2.45614035         |
|       | 85.3754941    | 12.6482213 | 1.97628458         |
| Q-KO1 | 35.8974359    | 38.4615385 | 25.6410256         |
|       | 33.5365854    | 39.0243902 | 27.4390244         |
|       | 33.3333333    | 39.6825397 | 26.984127          |
| Q-KO2 | 34.1772152    | 29.4303797 | 36.3924051         |
|       | 39.8230088    | 37.6106195 | 22.5663717         |
|       | 33.0097087    | 32.038835  | 34.9514563         |
| Q-KO2 | 28.3950617    | 30.0411523 | 41.563786          |
|       | 25            | 32.4074074 | 42.5925926         |
|       | 24.8322148    | 30.2013423 | 44.966443          |

**Figure 3f**

|      | Undifferentia | Mixed (%)  | Differentiated (%) |
|------|---------------|------------|--------------------|
| Ctrl | 87.2508402    | 9.57247679 | 3.17668297         |
|      | 86.7724868    | 9.52380952 | 3.7037037          |
|      | 88.2075472    | 9.66981132 | 2.12264151         |
| D-KO | 83.1325301    | 13.253012  | 3.61445783         |
|      | 78.5425101    | 16.5991903 | 4.8582996          |
|      | 76.7716535    | 20.4724409 | 2.75590551         |

|      |            |            |            |
|------|------------|------------|------------|
| E-KO | 72.4014337 | 22.5806452 | 5.01792115 |
|      | 73.3333333 | 22.3809524 | 4.28571429 |
|      | 78.1990521 | 17.535545  | 4.26540284 |
| Q-KO | 34.1463415 | 39.0243902 | 26.8292683 |
|      | 33.75      | 29.0625    | 37.1875    |
|      | 28.2786885 | 30.3278689 | 41.3934426 |

### Figure 3g

|      |            |            |            |
|------|------------|------------|------------|
| Ctrl | 3.17668297 | 3.7037037  | 2.12264151 |
| D-KO | 3.61445783 | 4.8582996  | 2.75590551 |
| E-KO | 5.01792115 | 4.28571429 | 4.06540284 |
| Q-KO | 26.8292683 | 37.1875    | 41.3934426 |

### Figure 3h

|      |                  |            |            |            |
|------|------------------|------------|------------|------------|
| Ctrl | Undifferentiated | 33.4943639 | 34.4173442 | 33.5981839 |
|      | Mixed (%)        | 23.9935588 | 23.4417344 | 22.2474461 |
|      | Differentiated   | 42.5120773 | 42.1409214 | 44.15437   |
| Q-KO | Undifferentiated | 57.4887892 | 71.3942308 | 61.0778443 |
|      | Mixed (%)        | 20.8071749 | 13.4615385 | 17.7644711 |
|      | Differentiated   | 21.7040359 | 15.1442308 | 21.1576846 |

### Figure 4a

|      |           |            |            |            |
|------|-----------|------------|------------|------------|
| Ctrl | Nanog     | 1.07922824 | 0.952638   | 0.9794203  |
|      | Oct4      | 0.9862327  | 1.02811383 | 0.9794203  |
|      | Sox2      | 1.17283495 | 0.952638   | 0.88884268 |
|      | Cdx2      | 1.03526492 | 0.96593633 | 1.00060063 |
|      | Ehox      | 0.882703   | 1.12505848 | 1.00388074 |
|      | Eomes     | 1.01395948 | 0.9930925  | 1.00352599 |
|      | Pax6      | 0.6359565  | 1.0118532  | 1.55509207 |
|      | Nestin    | 1.24833055 | 0.88884268 | 0.90751916 |
|      | Ngn2      | 1.75321144 | 0.57038186 | 1.16179665 |
|      | Fgf5      | 1.32868581 | 0.75262337 | 1.04065459 |
|      | Sox1      | 1.01045145 | 0.98965666 | 1.00005405 |
|      | Brachyury | 1.11728714 | 1.17283495 | 0.9631296  |
|      | Hand1     | 0.93952275 | 1.07177346 | 1.00564811 |
|      | Goosecoid | 1.40524675 | 0.66896378 | 0.98710526 |
|      | Runx1     | 1.22264028 | 0.73713461 | 1.10190512 |
|      | Sox17     | 1.39474367 | 0.87660572 | 0.82359102 |
|      | Gata4     | 1.02101213 | 0.8794203  | 1.27660572 |
|      | Gata6     | 1          | 1.0794223  | 0.90210121 |
|      | Sox9      | 0.63728031 | 0.87660572 | 1.28920712 |

|      |           |            |            |            |
|------|-----------|------------|------------|------------|
| Q-KO | Nanog     | 0.9930925  | 1.08673486 | 1.03991368 |
|      | Oct4      | 1.04246576 | 0.90751916 | 0.97499246 |
|      | Sox2      | 0.74742462 | 1.0942937  | 0.92085916 |
|      | Cdx2      | 18.1261422 | 14.2214829 | 17.1738125 |
|      | Ehox      | 7.43426175 | 6.73208051 | 7.08317113 |
|      | Eomes     | 8.39773347 | 9.44794129 | 8.92283738 |
|      | Pax6      | 12.7021429 | 7.50056877 | 12.1013558 |
|      | Nestin    | 2          | 1.91852824 | 1.95926412 |
|      | Ngn2      | 0.51763246 | 0.4413515  | 0.47949198 |
|      | Fgf5      | 0.53218509 | 0.75785828 | 0.64502169 |
|      | Sox1      | 0.30145196 | 0.94605765 | 0.6237548  |
|      | Brachyury | 2.46228883 | 1.47768536 | 1.71998709 |
|      | Hand1     | 1.40444488 | 1.00580783 | 1.30512635 |
|      | Goosecoid | 1.9668518  | 1.40841423 | 1.77263301 |
|      | Runx1     | 1.72078681 | 2.00381023 | 1.31229852 |
|      | Sox17     | 0.66896378 | 0.73204285 | 0.70050331 |
|      | Gata4     | 0.58236679 | 0.53588673 | 0.55912676 |
|      | Gata6     | 1.04971668 | 1.15668818 | 1.10320243 |
|      | Sox9      | 2.02946717 | 1.69349062 | 1.3114789  |

**Figure 4g**

|      |          |
|------|----------|
| Ctrl | 0.4709   |
|      | 1.1087   |
|      | 1.4191   |
| Q-KO | 6.230504 |
|      | 5.014804 |
|      | 3.109504 |

**Figure 7b**

|       |      |            |            |            |            |
|-------|------|------------|------------|------------|------------|
| Nanog | Ctrl | 1          | 1          | 1          | 1          |
|       | Q-KO | 2.81419647 | 2.28973075 | 7.41720206 | 7.88195681 |
| Oct4  | Ctrl | 1          | 1          | 1          | 1          |
|       | Q-KO | 6.26659693 | 12.9185717 | 7.74759502 | 8.74011802 |

**Figure 8b**

|              |       |            |            |            |
|--------------|-------|------------|------------|------------|
| Ctrl/VO      | Nanog | 1.0942937  | 1.02811383 | 0.90751916 |
|              | Oct4  | 1.10190512 | 0.93303299 | 0.97265495 |
|              | Sox2  | 1.00695555 | 1.00695555 | 0.9794203  |
| Ctrl/CVT-313 | Nanog | 1.37554182 | 1.17283495 | 1.18099266 |
|              | Oct4  | 1.05701804 | 1.01395948 | 1.03526492 |
|              | Sox2  | 1.12505848 | 1.61328352 | 1.39474367 |

|              |       |            |            |            |
|--------------|-------|------------|------------|------------|
| J1/VO        | Nanog | 0.84674531 | 0.97265495 | 1.13288389 |
|              | Oct4  | 0.90751916 | 0.9794203  | 1.12505848 |
|              | Sox2  | 0.92018765 | 1.02101213 | 1.07177346 |
| J1/CVT-313   | Nanog | 1.77768536 | 1.72907446 | 1.905276   |
|              | Oct4  | 1.22264028 | 1.43395525 | 1.35660433 |
|              | Sox2  | 1.12505848 | 1.10190512 | 1.13288389 |
| V6.5/VO      | Nanog | 0.94605765 | 1.18099266 | 1.02811383 |
|              | Oct4  | 0.97265495 | 1.02101213 | 1.00695555 |
|              | Sox2  | 1.08673486 | 1.10190512 | 0.83508792 |
| V6.5/CVT-313 | Nanog | 1.63580412 | 1.70526978 | 1.81503831 |
|              | Oct4  | 1.13288389 | 1.07177346 | 1.25701337 |
|              | Sox2  | 1.8276629  | 1.48452357 | 1.47426922 |

### Figure 8d

|       |         |            |            |            |
|-------|---------|------------|------------|------------|
| BT74  | VO      | 0.92018765 | 1.02811383 | 1.04971668 |
|       | CVT-313 | 1.00695555 | 1.04246576 | 1.01395948 |
| BT112 | VO      | 0.91193317 | 1.02597815 | 1.06954709 |
|       | CVT-313 | 1.48864526 | 1.60658799 | 1.65175533 |
| BT182 | VO      | 0.92018765 | 1.11728714 | 0.97265495 |
|       | CVT-313 | 1.02101213 | 0.96593633 | 1.01395948 |
| BT248 | VO      | 1.0942937  | 0.9794203  | 0.93952275 |
|       | CVT-313 | 1.06437018 | 1.10956947 | 0.84674531 |

### Figure 8g

|            |         |            |            |            |
|------------|---------|------------|------------|------------|
| CAL51      | VO      | 0.95926412 | 1.13288389 | 0.92658806 |
|            | CVT-313 | 1.06437018 | 1.22264028 | 0.7737825  |
| MDA-MB-436 | VO      | 1.13288389 | 0.96593633 | 0.92018765 |
|            | CVT-313 | 1.60213976 | 1.51571657 | 1.71713087 |
| HCC38      | VO      | 1          | 1.03526492 | 0.96593633 |
|            | CVT-313 | 1.32868581 | 1.47426922 | 1.4640857  |

### Supplementary Figure 1e

| Ctrl | %    | #1    | #2   | #3   | #4   |
|------|------|-------|------|------|------|
|      | G1   | 14.7  | 16.4 | 14.1 | 15   |
|      | S    | 76.8  | 73.1 | 76   | 76.9 |
|      | G2/M | 8.5   | 10.5 | 9.9  | 8.1  |
| D-KO | G1   | 20.2  | 19.5 | 19.7 | 19.4 |
|      | S    | 70.75 | 72.5 | 72.6 | 72.8 |
|      | G2/M | 9.1   | 8    | 7.7  | 7.8  |
| E-KO | G1   | 26.4  | 27   | 30.1 | 28.5 |
|      | S    | 62.4  | 58.3 | 58.4 | 63.2 |

|      |      |      |      |      |      |
|------|------|------|------|------|------|
|      | G2/M | 11.2 | 14.7 | 11.5 | 8.3  |
| Q-KO | G1   | 42.9 | 44.1 | 41.1 | 47.4 |
|      | S    | 47.5 | 47.4 | 44.6 | 39.5 |
|      | G2/M | 9.6  | 8.5  | 14.3 | 13.1 |

### Supplementary Figure 2a

|      |       |             |            |            |
|------|-------|-------------|------------|------------|
| Ctrl | Nanog | 1.07922824  | 0.952638   | 0.9794203  |
|      | Oct4  | 0.9862327   | 1.02811383 | 0.9794203  |
|      | Sox2  | 1.17283495  | 0.952638   | 0.88884268 |
|      | Cdx2  | 1.03526492  | 0.96593633 | 1.00060063 |
|      | Ehox  | 0.882703    | 1.12505848 | 1.00388074 |
|      | Eomes | 1.01395948  | 0.9930925  | 1.00352599 |
|      | Pax6  | 0.6359565   | 1.0118532  | 1.55509207 |
| E-KO | Nanog | 1.47938751  | 0.80944222 | 1.14341486 |
|      | Oct4  | 1.01395948  | 1          | 1.01697974 |
|      | Sox2  | 0.95926412  | 1.00695555 | 0.98410984 |
|      | Cdx2  | 2.54030197  | 1.82133967 | 2.18182082 |
|      | Ehox  | 2.337554497 | 2.4032721  | 2.3804133  |
|      | Eomes | 0.92338231  | 1.21841026 | 1.08089629 |
|      | Pax6  | 0.71946679  | 0.77110541 | 0.74528    |
| D-KO | Nanog | 0.94605765  | 1.00153784 | 1.06701804 |
|      | Oct4  | 1.02455682  | 1.00029429 | 0.98603176 |
|      | Sox2  | 0.95594532  | 1.10101513 | 1.04608494 |
|      | Cdx2  | 0.85559503  | 1.04848622 | 1.26137741 |
|      | Ehox  | 0.52374196  | 0.52965433 | 0.73556671 |
|      | Eomes | 1.43893358  | 1.22867192 | 1.21841026 |
|      | Pax6  | 2.15098878  | 1.8988767  | 1.84676462 |
| Q-KO | Nanog | 0.9930925   | 1.08673486 | 1.03991368 |
|      | Oct4  | 1.04246576  | 0.90751916 | 0.97499246 |
|      | Sox2  | 0.74742462  | 1.0942937  | 0.92085916 |
|      | Cdx2  | 18.1261422  | 14.2214829 | 17.1738125 |
|      | Ehox  | 7.43426175  | 6.73208051 | 7.08317113 |
|      | Eomes | 8.39773347  | 9.44794129 | 8.92283738 |
|      | Pax6  | 12.7021429  | 7.50056877 | 12.1013558 |

### Supplementary Figure 2b

|       |            |            |            |
|-------|------------|------------|------------|
|       | %          | %          | %          |
| Nanog | 100        | 100        | 100        |
|       | 61.6563927 | 63.9195159 | 67.088579  |
|       | 82.6631581 | 77.6259607 | 82.4770409 |
|       | 17.7949434 | 16.7914647 | 17.7404704 |



|      |            |            |            |
|------|------------|------------|------------|
| Oct4 | 100        | 100        | 100        |
|      | 45.9879495 | 42.724249  | 44.454272  |
|      | 55.0914509 | 50.3689053 | 51.1838931 |
|      | 11.6137503 | 9.12669809 | 10.3537471 |
| Sox2 | 100        | 100        | 100        |
|      | 70.8409702 | 69.0953463 | 72.9302097 |
|      | 30.2643962 | 27.8571975 | 28.6801388 |
|      | 3.34912465 | 2.75751627 | 3.06624276 |

### Supplementary Figure 4b

|      |            |            |            |
|------|------------|------------|------------|
| Ctrl | 0          | 0          | 0          |
|      | -0.8470488 | -0.5041392 | -0.2339147 |
|      | -0.8711556 | -1.3169966 | -0.7487569 |
|      | -1.6518364 | -1.4905396 | -1.4144238 |
|      | -2.0601632 | -1.8108432 | -1.4668305 |
|      | -2.5901462 | -2.5292092 | -1.6510955 |
|      | -4.779929  | -2.3818286 | -2.3751193 |
| Q-KO | 0          | 0          | 0          |
|      | -1.2041213 | -1.6569044 | -0.741492  |
|      | -1.9296656 | -2.4534877 | -2.2668396 |
|      | -2.8615835 | -4.9689996 | -3.7163974 |
|      | -4.0580617 | -6.3393018 | -3.2274411 |
|      | -4.5034921 | -5.671675  | -4.092867  |
|      | -4.8484012 | -6.7235202 | -5.1608334 |

### Supplementary Figure 4c

|      |            |            |            |
|------|------------|------------|------------|
| Ctrl | 0          | 0          | 0          |
|      | -0.4062743 | -0.4933422 | -0.3923757 |
|      | -0.2919817 | -0.6293816 | -0.5898413 |
|      | -0.8640625 | -0.6945423 | -0.7199832 |
|      | -1.3120184 | -0.7885742 | -1.0896771 |
|      | -1.4396391 | -1.2057118 | -1.5151601 |
|      | -3.0729481 | -1.67579   | -1.6311879 |
| Q-KO | 0          | 0          | 0          |
|      | -0.0074194 | -1.1555429 | -0.9248671 |
|      | -0.6016694 | -1.6938093 | -1.6174814 |
|      | -1.4442862 | -3.6893651 | -2.638045  |
|      | -1.9767007 | -4.8071362 | -4.8458134 |
|      | -2.2128046 | -4.8186812 | -4.8915563 |
|      | -5.4165666 | -6.9687505 | -5.4691288 |

### Supplementary Figure 4d

|      |            |             |            |
|------|------------|-------------|------------|
| Ctrl | 0          | 0           | 0          |
|      | -0.3690493 | -0.03347521 | 0.07826603 |
|      | -0.1674004 | -0.03603860 | -0.0123246 |
|      | -0.2942481 | -0.06704950 | 0.24088477 |
|      | -0.526489  | -0.04241135 | -0.3511051 |
|      | -1.6934622 | -0.22078644 | -0.9676764 |
|      | -2.1337967 | -3.36395896 | -1.6444182 |
| Q-KO | 0          | 0           | 0          |
|      | -0.6628446 | -0.9428382  | -0.8964172 |
|      | -3.863306  | -1.4009725  | -2.2176712 |
|      | -3.0954171 | -2.4543299  | -2.4383586 |
|      | -3.3440047 | -2.0643348  | -2.5210756 |
|      | -3.1338288 | -2.7724477  | -3.262071  |
|      | -3.8847819 | -6.1879054  | -5.2451342 |

### Supplementary Figure 5b

|   | WT         | 4A         | 4E         |
|---|------------|------------|------------|
| 0 | 0          | 0          | 0          |
| 1 | -0.7434058 | -0.8030555 | -0.0745015 |
| 2 | -1.410583  | -2.3939384 | -0.696064  |
| 3 | -2.1671003 | -4.4471256 | -1.0049311 |

### Supplementary Figure 5d

|   | WT         | 3A         | 3E         |
|---|------------|------------|------------|
| 0 | 0          | 0          | 0          |
| 1 | -0.4732316 | -1.59494   | -0.108865  |
| 2 | -0.3922983 | -2.6702565 | -0.0434846 |
| 3 | -1.0056984 | -3.1479708 | -0.1979352 |

### Supplementary Figure 5f

|   | WT         | 4A         | 4E         |
|---|------------|------------|------------|
| 0 | 0          | 0          | 0          |
| 2 | -0.7658248 | -2.5046622 | -0.110323  |
| 4 | -0.6000059 | -3.0607566 | -0.3402993 |
| 7 | -2.0295322 | -2.8491202 | -0.4526407 |

### Supplementary Figure 6a

|       | %          | %          | %          |
|-------|------------|------------|------------|
| Nanog | 27.3193653 | 25.387138  | 14.4338805 |
| Oct4  | 37.2909096 | 31.9897935 | 49.5223843 |

Sox2 4.19952836 17.7571212 7.90677325

**Supplementary Figure 7a**

|            | VO   | CVT-313 |
|------------|------|---------|
| BT74       | 9.4  | 17      |
|            | 10.4 | 14.6    |
|            | 17.8 | 13.5    |
| BT112      | 31.4 | 23.2    |
|            | 25.6 | 28.9    |
|            | 27.7 | 35.2    |
| BT182      | 8.2  | 26.5    |
|            | 5.6  | 24.6    |
|            | 5.4  | 23.3    |
| BT248      | 12.4 | 12.9    |
|            | 12.3 | 12.5    |
|            | 11.3 | 14.9    |
| MDA-MB-436 | 12.5 | 11.8    |
|            | 5.7  | 9.3     |
|            | 5.2  | 7.8     |
| HCC38      | 16.2 | 44.4    |
|            | 18.8 | 44.5    |
|            | 18.1 | 40.4    |
| CAL51      | 17.4 | 30      |
|            | 11.9 | 12.1    |
|            | 20.4 | 22.6    |

**Supplementary Figure 7b**

|       |        | G1   | S    | G2/M |
|-------|--------|------|------|------|
| BT74  | No CVT | 45.8 | 44.5 | 9.7  |
|       |        | 49.1 | 42.9 | 8    |
|       |        | 49.5 | 43.2 | 7.3  |
|       | CVT10  | 70.1 | 8.3  | 21.6 |
|       |        | 62.5 | 20   | 17.5 |
|       |        | 64.8 | 18.2 | 17   |
| BT112 | No CVT | 46.5 | 36.5 | 17   |
|       |        | 59.7 | 22.5 | 17.8 |
|       |        | 51.9 | 29.5 | 18.6 |
|       | CVT10  | 64.3 | 9.3  | 26.4 |
|       |        | 68.4 | 1.8  | 29.8 |
|       |        | 61   | 6.5  | 32.5 |
| BT182 | No CVT | 68.7 | 26   | 5.3  |

|       |        |      |      |      |
|-------|--------|------|------|------|
|       |        | 60.4 | 28.8 | 10.8 |
|       |        | 61.2 | 28.2 | 10.6 |
|       | CVT10  | 66.7 | 1.3  | 32   |
|       |        | 61.1 | 9.2  | 29.7 |
|       |        | 66.9 | 7.2  | 25.9 |
| BT248 | No CVT | 69.4 | 19.3 | 11.3 |
|       |        | 73.7 | 20.1 | 6.2  |
|       |        | 78   | 15.5 | 6.5  |
|       | CVT10  | 79.5 | 1    | 19.5 |
|       |        | 73.3 | 4.2  | 22.5 |
|       |        | 77.9 | 3.2  | 18.9 |

### Supplementary Figure 7c

|            |        | G1   | S    | G2/M |
|------------|--------|------|------|------|
| MDA-MB-436 | No CVT | 39.1 | 17.1 | 43.8 |
|            |        | 31.8 | 11.2 | 57   |
|            |        | 52.5 | 11.5 | 36   |
|            | CVT10  | 41.7 | 8.3  | 50   |
|            |        | 33.3 | 3.2  | 63.5 |
|            |        | 51.5 | 2.5  | 46   |
| HCC38      | No CVT | 64.4 | 26.3 | 9.3  |
|            |        | 67.9 | 23.3 | 8.8  |
|            |        | 66.3 | 24.1 | 9.6  |
|            | CVT10  | 54.5 | 9.3  | 36.2 |
|            |        | 55.2 | 8.1  | 36.7 |
|            |        | 54.8 | 9.4  | 35.8 |
| CAL51      | No CVT | 32.6 | 55.3 | 12.1 |
|            |        | 37.5 | 46   | 16.5 |
|            |        | 33.2 | 53.6 | 13.2 |
|            | CVT10  | 34.2 | 43.1 | 22.7 |
|            |        | 33.4 | 46.1 | 20.5 |
|            |        | 30   | 52.5 | 17.5 |

### Supplementary Figure 8a

| Apoptosis  | VO   | CVT10 |
|------------|------|-------|
| HA ctrl    | 10.1 | 14.4  |
|            | 11.8 | 15.5  |
|            | 7.4  | 10.3  |
| HA Sox2 EE | 8.4  | 11.6  |
|            | 9.5  | 10.4  |
|            | 9.8  | 13.2  |

|               | G1   | S    | G2/M |
|---------------|------|------|------|
| HA ctrl/VO    | 41   | 19.2 | 39.8 |
|               | 39.5 | 17.2 | 43.3 |
|               | 42.3 | 16.9 | 40.8 |
| HA ctrl/CVT-3 | 42.1 | 5.7  | 52.2 |
|               | 40.2 | 9.2  | 50.6 |
|               | 39.2 | 8.4  | 52.4 |
| HA Sox2 EE/v  | 36.6 | 19.3 | 44.1 |
|               | 39.3 | 17.9 | 42.8 |
|               | 40.4 | 19.5 | 40.1 |
| HA Sox2 EE/C  | 40.1 | 4.7  | 55.2 |
|               | 43.9 | 6.1  | 50   |
|               | 41.2 | 4.6  | 54.2 |

### Supplementary Figure 8b

| Apoptosis     | VO   | CVT10 |      |
|---------------|------|-------|------|
| HA ctrl       | 15.8 | 38.8  |      |
|               | 13.4 | 27.9  |      |
|               | 13.9 | 30.2  |      |
| HA Sox2 EE    | 17.1 | 41.6  |      |
|               | 17.6 | 35.6  |      |
|               | 17.2 | 32.4  |      |
|               | G1   | S     | G2/M |
| HA ctrl/VO    | 69   | 20.3  | 10.7 |
|               | 64.5 | 22    | 13.5 |
|               | 67.2 | 20.3  | 12.5 |
| HA ctrl/CVT-3 | 60.1 | 11.2  | 28.7 |
|               | 53.8 | 10.2  | 36   |
|               | 56.3 | 9.8   | 33.9 |
| HA Sox2 EE/v  | 68.5 | 21    | 10.5 |
|               | 67.1 | 19.2  | 13.7 |
|               | 67.5 | 20    | 12.5 |
| HA Sox2 EE/C  | 48.4 | 12.7  | 38.9 |
|               | 50.1 | 10.9  | 39   |
|               | 47.9 | 12.8  | 39.3 |

### Supplementary Figure 8c

| Apoptosis | VO   | CVT10 |
|-----------|------|-------|
| HA ctrl   | 16.3 | 25.5  |
|           | 13.9 | 19.4  |
|           | 12   | 18.7  |

|               |      |      |      |
|---------------|------|------|------|
| HA Oct4 EE    | 14.1 | 24   |      |
|               | 13.6 | 17.8 |      |
|               | 15.1 | 22.9 |      |
|               | G1   | S    | G2/M |
| HA ctrl/VO    | 39.1 | 48.7 | 12.2 |
|               | 25.5 | 56.7 | 17.8 |
|               | 30.3 | 54.8 | 14.9 |
| HA ctrl/CVT-3 | 33.9 | 50.1 | 16   |
|               | 29.2 | 53.3 | 17.5 |
|               | 31.8 | 54.1 | 14.1 |
| HA Oct4 EE/v  | 35.3 | 52.3 | 12.4 |
|               | 36.5 | 48.5 | 15   |
|               | 35.1 | 46.8 | 18.1 |
| HA Oct4 EE/C  | 34.3 | 51.5 | 14.2 |
|               | 34.7 | 47.3 | 18   |
|               | 38.5 | 50.5 | 11   |
